# Supplementary material for: Isolation and Genome Analysis of an Amoeba-Associated Bacterium Dyella terrae Strain Ely Copper Mine From Acid Rock Drainage in Vermont, United States
Source: Front Microbiol. 2022 May 23;13:856908. doi: 10.3389/fmicb.2022.856908 (PMC9169046; doi:10.3389/fmicb.2022.856908)
Supplement: Supplementary file 1 [file Table_2.XLSX]

## Sheet: Protein coding genes with K#s
KEGG annotations (K#s) of Dyella terrae species Ely Copper Mine genome (BioProject PRJ771916)
There are a total of 2149 genes annotated with K#s
Protein coding gene	Annotated K#
DYST_00001
DYST_00002	K02519
DYST_00003	K02834
DYST_00004	K03177
DYST_00006	K02956
DYST_00007	K00962
DYST_00008
DYST_00009	K03821
DYST_00010
DYST_00011	K08963
DYST_00012
DYST_00013	K02469
DYST_00014
DYST_00015
DYST_00016
DYST_00017	K24136
DYST_00018	K05516
DYST_00019	K02658
DYST_00020	K19745
DYST_00021
DYST_00022	K00382
DYST_00023	K00658
DYST_00024	K00164
DYST_00025
DYST_00026	K18850
DYST_00027	K07090
DYST_00028	K00380
DYST_00029	K00381
DYST_00030	K00390
DYST_00031	K00958
DYST_00032	K13634
DYST_00033	K02302
DYST_00034	K01738
DYST_00035
DYST_00036	K00799
DYST_00037
DYST_00038	K01756
DYST_00039	K01679
DYST_00040
DYST_00041
DYST_00042
DYST_00043	K01990
DYST_00044	K07979
DYST_00045
DYST_00046
DYST_00047	K20541
DYST_00048	K20542
DYST_00049	K20543
DYST_00050
DYST_00051
DYST_00052
DYST_00053	K00694
DYST_00054
DYST_00055
DYST_00056
DYST_00057
DYST_00058
DYST_00059
DYST_00060
DYST_00061
DYST_00062
DYST_00063
DYST_00064
DYST_00065
DYST_00066
DYST_00067
DYST_00068
DYST_00069
DYST_00070
DYST_00071
DYST_00072
DYST_00073
DYST_00074
DYST_00075
DYST_00076
DYST_00077
DYST_00078
DYST_00079
DYST_00080
DYST_00081
DYST_00082
DYST_00083
DYST_00084
DYST_00085
DYST_00086
DYST_00087
DYST_00089
DYST_00090	K03664
DYST_00091
DYST_00092	K09801
DYST_00093	K06186
DYST_00094	K03711
DYST_00095	K07675
DYST_00096	K07686
DYST_00097	K03631
DYST_00098	K03705
DYST_00099	K03687
DYST_00100	K04043
DYST_00101	K03686
DYST_00102	K00215
DYST_00104
DYST_00105
DYST_00106
DYST_00107
DYST_00108	K01956
DYST_00109	K01955
DYST_00110	K03624
DYST_00111
DYST_00112	K00219
DYST_00113	K08762
DYST_00114	K00945
DYST_00115	K02945
DYST_00116	K05788
DYST_00117
DYST_00118	K19804
DYST_00119	K13007
DYST_00120
DYST_00121	K00963
DYST_00122	K06894
DYST_00123	K05367
DYST_00124	K09471
DYST_00125	K06878
DYST_00126
DYST_00127
DYST_00128
DYST_00129	K06911
DYST_00132
DYST_00133	K06996
DYST_00134
DYST_00135
DYST_00136
DYST_00137
DYST_00138	K07798
DYST_00139	K07787
DYST_00140
DYST_00141
DYST_00142
DYST_00143
DYST_00144
DYST_00145	K03561
DYST_00146	K03559
DYST_00147	K03832
DYST_00148
DYST_00149
DYST_00150
DYST_00151
DYST_00152
DYST_00153
DYST_00154
DYST_00155
DYST_00156	K02454
DYST_00157
DYST_00158
DYST_00159	K02456
DYST_00160	K02457
DYST_00161
DYST_00162
DYST_00163
DYST_00164
DYST_00165
DYST_00166
DYST_00167	K02453
DYST_00168
DYST_00169	K20533
DYST_00170	K20532
DYST_00171	K20531
DYST_00172	K07344
DYST_00173
DYST_00174	K20266
DYST_00175	K20530
DYST_00176	K20529
DYST_00177	K20528
DYST_00178	K20527
DYST_00179
DYST_00180	K03205
DYST_00181
DYST_00182
DYST_00183	K07229
DYST_00184
DYST_00185
DYST_00186
DYST_00187
DYST_00188
DYST_00189
DYST_00190
DYST_00191
DYST_00192
DYST_00193	K03496
DYST_00194
DYST_00195
DYST_00196
DYST_00197
DYST_00198
DYST_00199
DYST_00200
DYST_00201	K03497
DYST_00202
DYST_00203	K03630
DYST_00204	K07458
DYST_00205
DYST_00206
DYST_00207
DYST_00208
DYST_00209
DYST_00210	K00558
DYST_00211	K07726
DYST_00212
DYST_00213
DYST_00214
DYST_00215	K07689
DYST_00216	K08300
DYST_00217
DYST_00218	K06179
DYST_00219
DYST_00220	K01724
DYST_00221	K07400
DYST_00222
DYST_00223
DYST_00224	K01183
DYST_00225
DYST_00226	K12251
DYST_00227	K10536
DYST_00228
DYST_00229	K06158
DYST_00230
DYST_00231	K07462
DYST_00232
DYST_00233
DYST_00234
DYST_00235
DYST_00236
DYST_00237
DYST_00238
DYST_00239
DYST_00240	K11617
DYST_00241	K07688
DYST_00242
DYST_00243	K01971
DYST_00244
DYST_00245
DYST_00246	K01118
DYST_00247
DYST_00248	K14287
DYST_00249	K13566
DYST_00250
DYST_00251
DYST_00252	K07727
DYST_00253	K00537
DYST_00254	K06178
DYST_00255	K06024
DYST_00256	K05896
DYST_00257	K02346
DYST_00258
DYST_00259	K01897
DYST_00260
DYST_00261	K01681
DYST_00262
DYST_00263
DYST_00264	K01682
DYST_00265	K01046
DYST_00266
DYST_00267
DYST_00268	K01141
DYST_00269	K13288
DYST_00270	K00796
DYST_00271	K03431
DYST_00272
DYST_00273	K07124
DYST_00274	K01803
DYST_00275	K03075
DYST_00277
DYST_00278
DYST_00279	K07497
DYST_00280	K07483
DYST_00281
DYST_00282
DYST_00283
DYST_00284
DYST_00285	K24790
DYST_00286
DYST_00287
DYST_00288
DYST_00289
DYST_00290
DYST_00291
DYST_00292	K03322
DYST_00293	K24160
DYST_00294	K23054
DYST_00295
DYST_00296
DYST_00297
DYST_00298	K00036
DYST_00299
DYST_00300	K00616
DYST_00301	K01810
DYST_00302	K01835
DYST_00303	K00615
DYST_00304	K00033
DYST_00305
DYST_00306
DYST_00307
DYST_00308
DYST_00309
DYST_00310
DYST_00311
DYST_00312
DYST_00313
DYST_00314
DYST_00315
DYST_00316
DYST_00317
DYST_00318
DYST_00319
DYST_00320
DYST_00321
DYST_00322
DYST_00323
DYST_00324
DYST_00325
DYST_00326
DYST_00327
DYST_00328
DYST_00329
DYST_00330
DYST_00331
DYST_00332
DYST_00333
DYST_00334
DYST_00335
DYST_00336
DYST_00337
DYST_00338
DYST_00339
DYST_00340
DYST_00341
DYST_00342
DYST_00343
DYST_00344	K07666
DYST_00345	K07645
DYST_00346
DYST_00347
DYST_00348
DYST_00349
DYST_00350	K01198
DYST_00351	K01206
DYST_00352
DYST_00353	K18578
DYST_00354	K05970
DYST_00355
DYST_00356
DYST_00357	K02529
DYST_00358	K01684
DYST_00359	K00854
DYST_00360	K01805
DYST_00361	K06609
DYST_00362	K01811
DYST_00363
DYST_00364	K01205
DYST_00365
DYST_00366
DYST_00367
DYST_00368
DYST_00369
DYST_00370
DYST_00371
DYST_00372
DYST_00373	K01953
DYST_00374	K01007
DYST_00375
DYST_00376
DYST_00377
DYST_00378
DYST_00379	K02836
DYST_00380
DYST_00381	K04567
DYST_00382
DYST_00384
DYST_00385	K09780
DYST_00386	K22066
DYST_00387	K03529
DYST_00388	K03528
DYST_00389	K06132
DYST_00390
DYST_00391
DYST_00392
DYST_00393
DYST_00394
DYST_00395	K07221
DYST_00396	K00209
DYST_00397	K01669
DYST_00398
DYST_00399
DYST_00400	K06140
DYST_00401
DYST_00402	K01972
DYST_00403	K04568
DYST_00404	K08234
DYST_00405	K06188
DYST_00406
DYST_00407	K07153
DYST_00408	K00566
DYST_00409
DYST_00410	K06891
DYST_00411	K03694
DYST_00412
DYST_00413
DYST_00414
DYST_00415
DYST_00416	K07687
DYST_00417	K02518
DYST_00418
DYST_00419
DYST_00420	K00831
DYST_00421	K14170
DYST_00422	K00800
DYST_00423	K00979
DYST_00424
DYST_00425
DYST_00426	K25307
DYST_00427	K03703
DYST_00428	K00995
DYST_00430	K11737
DYST_00431	K09990
DYST_00432
DYST_00433
DYST_00434
DYST_00435	K09912
DYST_00436
DYST_00437
DYST_00438	K00632
DYST_00439	K07516
DYST_00440
DYST_00441	K00940
DYST_00442	K06941
DYST_00443	K02656
DYST_00444
DYST_00445
DYST_00446
DYST_00447	K17713
DYST_00448	K03977
DYST_00449	K21029
DYST_00450	K03817
DYST_00451	K01491
DYST_00452	K00088
DYST_00453	K01951
DYST_00454
DYST_00455
DYST_00456
DYST_00457	K11991
DYST_00458
DYST_00459	K12410
DYST_00460	K07025
DYST_00461
DYST_00462	K07221
DYST_00463
DYST_00464
DYST_00465	K07305
DYST_00466
DYST_00467	K02014
DYST_00468	K03234
DYST_00469	K07674
DYST_00470	K11618
DYST_00471	K00433
DYST_00472
DYST_00473
DYST_00474
DYST_00475
DYST_00476
DYST_00477
DYST_00478
DYST_00479
DYST_00480	K00476
DYST_00481
DYST_00482
DYST_00483	K11904
DYST_00484
DYST_00485
DYST_00486
DYST_00487
DYST_00488
DYST_00489
DYST_00490
DYST_00491
DYST_00492	K03387
DYST_00493	K24119
DYST_00494	K00528
DYST_00495	K01662
DYST_00496	K03527
DYST_00497	K00099
DYST_00498	K00795
DYST_00499
DYST_00500
DYST_00501
DYST_00502
DYST_00503	K06045
DYST_00504	K00801
DYST_00505	K00091
DYST_00506
DYST_00507
DYST_00508	K03478
DYST_00509	K04034
DYST_00510	K00720
DYST_00511
DYST_00512
DYST_00513	K01823
DYST_00514
DYST_00515
DYST_00516	K01356
DYST_00517
DYST_00518	K14161
DYST_00519	K14162
DYST_00520	K07243
DYST_00521
DYST_00522
DYST_00523
DYST_00524
DYST_00525	K03429
DYST_00526
DYST_00527
DYST_00528
DYST_00529
DYST_00530
DYST_00531	K01091
DYST_00532	K11477
DYST_00533	K05817
DYST_00534	K09474
DYST_00535
DYST_00536
DYST_00537	K01607
DYST_00538
DYST_00539
DYST_00540
DYST_00541	K16137
DYST_00542
DYST_00543
DYST_00544
DYST_00545
DYST_00546	K09936
DYST_00547
DYST_00548	K02019
DYST_00549
DYST_00550
DYST_00551	K16091
DYST_00552
DYST_00553
DYST_00554
DYST_00555
DYST_00556	K02529
DYST_00557	K18577
DYST_00558
DYST_00559
DYST_00560	K12373
DYST_00561
DYST_00562	K08257
DYST_00563
DYST_00564
DYST_00565	K01684
DYST_00566	K01631
DYST_00567	K00883
DYST_00568	K05799
DYST_00569
DYST_00570
DYST_00571	K01785
DYST_00572
DYST_00573	K08138
DYST_00574	K07407
DYST_00575
DYST_00576
DYST_00577	K18826
DYST_00578
DYST_00579
DYST_00580
DYST_00581
DYST_00582
DYST_00583
DYST_00584
DYST_00585
DYST_00586
DYST_00587	K04763
DYST_00588
DYST_00589
DYST_00590
DYST_00591
DYST_00592
DYST_00593
DYST_00594
DYST_00595	K03350
DYST_00596	K02420
DYST_00597
DYST_00598	K13820
DYST_00599	K02400
DYST_00600
DYST_00601
DYST_00602
DYST_00603	K02393
DYST_00604	K02394
DYST_00605
DYST_00606
DYST_00607
DYST_00608	K02409
DYST_00609
DYST_00610
DYST_00611	K02412
DYST_00612
DYST_00613
DYST_00614	K02389
DYST_00615
DYST_00616
DYST_00617
DYST_00618
DYST_00619	K02419
DYST_00620
DYST_00621
DYST_00622
DYST_00623
DYST_00624
DYST_00625
DYST_00626
DYST_00627
DYST_00628
DYST_00629
DYST_00630
DYST_00631
DYST_00632	K17488
DYST_00633	K01342
DYST_00634
DYST_00635	K03088
DYST_00636
DYST_00637	K08738
DYST_00638
DYST_00639
DYST_00640
DYST_00641
DYST_00642
DYST_00643	K13017
DYST_00644	K16693
DYST_00645	K12988
DYST_00646
DYST_00647
DYST_00648
DYST_00649	K06219
DYST_00650
DYST_00651
DYST_00652	K04034
DYST_00653
DYST_00654	K21011
DYST_00655
DYST_00656
DYST_00657
DYST_00658	K02471
DYST_00659
DYST_00660
DYST_00661
DYST_00662
DYST_00663
DYST_00664
DYST_00665
DYST_00666
DYST_00667
DYST_00668	K18305
DYST_00669	K00128
DYST_00670
DYST_00671
DYST_00672
DYST_00673
DYST_00674
DYST_00675
DYST_00676
DYST_00677	K01206
DYST_00678
DYST_00679
DYST_00680
DYST_00681
DYST_00682
DYST_00683
DYST_00684
DYST_00685
DYST_00686
DYST_00687
DYST_00688
DYST_00689
DYST_00690
DYST_00691
DYST_00692
DYST_00693
DYST_00694
DYST_00695
DYST_00696
DYST_00697
DYST_00698
DYST_00699
DYST_00700	K01085
DYST_00701	K11902
DYST_00702
DYST_00703
DYST_00704
DYST_00705
DYST_00706	K12132
DYST_00707	K11915
DYST_00708	K11890
DYST_00709	K11891
DYST_00710	K11892
DYST_00711	K11893
DYST_00712
DYST_00713
DYST_00714	K11894
DYST_00715
DYST_00716	K11904
DYST_00717
DYST_00718
DYST_00719
DYST_00720	K11907
DYST_00721	K11895
DYST_00722	K11896
DYST_00723	K11897
DYST_00724	K11898
DYST_00725	K11903
DYST_00726	K11900
DYST_00727	K11901
DYST_00728
DYST_00729
DYST_00730	K00156
DYST_00731
DYST_00732	K18900
DYST_00733
DYST_00734
DYST_00735
DYST_00736
DYST_00737
DYST_00738	K07303
DYST_00739	K07302
DYST_00740	K07402
DYST_00741	K07141
DYST_00742	K01487
DYST_00743	K01725
DYST_00744	K01673
DYST_00745	K11921
DYST_00746
DYST_00747
DYST_00748
DYST_00749
DYST_00750
DYST_00751	K02014
DYST_00752
DYST_00753
DYST_00754
DYST_00755	K20973
DYST_00756	K07687
DYST_00757
DYST_00758
DYST_00759
DYST_00760
DYST_00761
DYST_00762	K01835
DYST_00763
DYST_00764
DYST_00765
DYST_00766	K07397
DYST_00767
DYST_00768
DYST_00769
DYST_00770
DYST_00771
DYST_00772
DYST_00773
DYST_00774
DYST_00775
DYST_00776
DYST_00777
DYST_00778
DYST_00779
DYST_00780
DYST_00781	K18444
DYST_00782
DYST_00783
DYST_00784
DYST_00785
DYST_00786	K01173
DYST_00787	K22278
DYST_00788
DYST_00789	K10914
DYST_00790
DYST_00791
DYST_00792
DYST_00793
DYST_00795
DYST_00796	K01875
DYST_00797
DYST_00798	K18991
DYST_00799
DYST_00800
DYST_00801	K07478
DYST_00802
DYST_00803
DYST_00804
DYST_00805
DYST_00806
DYST_00807
DYST_00808
DYST_00809	K21020
DYST_00810	K03634
DYST_00811	K03466
DYST_00812	K00259
DYST_00813	K00384
DYST_00814	K09919
DYST_00815
DYST_00816	K00684
DYST_00817
DYST_00818
DYST_00819	K08989
DYST_00820
DYST_00821
DYST_00822
DYST_00823	K03526
DYST_00824	K01420
DYST_00825
DYST_00826
DYST_00827	K03601
DYST_00828	K01652
DYST_00829
DYST_00830
DYST_00831
DYST_00832
DYST_00833
DYST_00834
DYST_00835	K03306
DYST_00836
DYST_00837	K16297
DYST_00838
DYST_00839	K18697
DYST_00840
DYST_00841	K13979
DYST_00842
DYST_00843
DYST_00844
DYST_00845
DYST_00846	K03088
DYST_00847
DYST_00848
DYST_00849
DYST_00850	K06147
DYST_00851
DYST_00852
DYST_00853	K06201
DYST_00854	K01444
DYST_00855	K03704
DYST_00856	K00772
DYST_00857	K19784
DYST_00858	K00760
DYST_00859	K01207
DYST_00860
DYST_00861	K03215
DYST_00862
DYST_00863
DYST_00864
DYST_00865	K03584
DYST_00866	K03595
DYST_00867	K03685
DYST_00868
DYST_00869	K03100
DYST_00870	K03596
DYST_00871	K04771
DYST_00872
DYST_00873
DYST_00874	K03088
DYST_00875
DYST_00876
DYST_00877	K01782
DYST_00878
DYST_00879
DYST_00880	K00012
DYST_00881	K03772
DYST_00882	K03455
DYST_00886
DYST_00887	K09773
DYST_00888	K01007
DYST_00889
DYST_00890	K03100
DYST_00892	K20074
DYST_00893
DYST_00894	K02342
DYST_00895	K03469
DYST_00896
DYST_00897	K01069
DYST_00898	K08307
DYST_00899	K03770
DYST_00902	K01338
DYST_00903	K03544
DYST_00904	K01358
DYST_00905	K03545
DYST_00907
DYST_00908	K03684
DYST_00910	K11939
DYST_00911
DYST_00912
DYST_00913
DYST_00914	K07126
DYST_00915	K07336
DYST_00916	K16090
DYST_00917	K22926
DYST_00918	K08679
DYST_00919
DYST_00920
DYST_00921	K20997
DYST_00922
DYST_00923
DYST_00924
DYST_00925
DYST_00926
DYST_00927	K12444
DYST_00928	K15667
DYST_00929
DYST_00930
DYST_00931
DYST_00932
DYST_00933	K19422
DYST_00934	K00754
DYST_00935	K23558
DYST_00936
DYST_00937	K22278
DYST_00938
DYST_00939
DYST_00940
DYST_00941	K16698
DYST_00942
DYST_00943
DYST_00944
DYST_00945	K01784
DYST_00946
DYST_00947
DYST_00948
DYST_00949	K16692
DYST_00950
DYST_00951	K01991
DYST_00952
DYST_00953
DYST_00954	K09838
DYST_00955
DYST_00956
DYST_00957
DYST_00958
DYST_00959
DYST_00960
DYST_00961
DYST_00962
DYST_00963
DYST_00964
DYST_00965
DYST_00966
DYST_00967
DYST_00968
DYST_00969
DYST_00970
DYST_00971	K03286
DYST_00972	K21449
DYST_00973	K21449
DYST_00974
DYST_00975	K04719
DYST_00976
DYST_00977
DYST_00978
DYST_00979
DYST_00980
DYST_00981
DYST_00982
DYST_00983	K07785
DYST_00984
DYST_00985
DYST_00986
DYST_00987
DYST_00988
DYST_00989
DYST_00990
DYST_00991
DYST_00992
DYST_00993	K02014
DYST_00994	K03649
DYST_00995
DYST_00996
DYST_00997
DYST_00998
DYST_00999
DYST_01000
DYST_01001
DYST_01002
DYST_01003
DYST_01004
DYST_01005
DYST_01006	K10536
DYST_01007
DYST_01008
DYST_01009
DYST_01010
DYST_01011
DYST_01012
DYST_01018	K03798
DYST_01019	K02427
DYST_01020	K07574
DYST_01021
DYST_01022	K06194
DYST_01023
DYST_01024	K00573
DYST_01025	K03787
DYST_01026
DYST_01027	K06176
DYST_01028	K01770
DYST_01029	K00991
DYST_01030	K05589
DYST_01031	K01689
DYST_01032
DYST_01033	K01627
DYST_01034	K01937
DYST_01035
DYST_01036	K02299
DYST_01037	K02298
DYST_01038	K02297
DYST_01039	K01262
DYST_01040
DYST_01041	K02622
DYST_01042
DYST_01043
DYST_01044	K01738
DYST_01045	K00452
DYST_01046
DYST_01047	K03294
DYST_01048	K03294
DYST_01049
DYST_01050	K08964
DYST_01051	K08967
DYST_01052	K09880
DYST_01053
DYST_01054	K02045
DYST_01055	K02047
DYST_01056	K02046
DYST_01057	K23163
DYST_01058
DYST_01059	K11755
DYST_01060	K02500
DYST_01061	K01814
DYST_01062	K02501
DYST_01063	K01089
DYST_01064	K00817
DYST_01065	K00013
DYST_01066	K00765
DYST_01067
DYST_01068
DYST_01069
DYST_01070
DYST_01071	K01745
DYST_01072
DYST_01073	K01892
DYST_01075
DYST_01076	K07003
DYST_01077
DYST_01078
DYST_01079
DYST_01080	K03556
DYST_01081	K01897
DYST_01082
DYST_01083	K08764
DYST_01084
DYST_01085
DYST_01086	K14729
DYST_01087
DYST_01088	K07516
DYST_01089	K00632
DYST_01090
DYST_01091
DYST_01092	K03522
DYST_01093	K03521
DYST_01094	K01796
DYST_01095	K00128
DYST_01096
DYST_01097
DYST_01098	K03931
DYST_01099
DYST_01100
DYST_01101	K14286
DYST_01102
DYST_01103	K12308
DYST_01104
DYST_01105	K00764
DYST_01106	K03558
DYST_01107
DYST_01108	K11754
DYST_01109
DYST_01110
DYST_01111
DYST_01112	K17686
DYST_01113	K19591
DYST_01114
DYST_01115
DYST_01116
DYST_01117
DYST_01118	K07274
DYST_01119
DYST_01120	K16301
DYST_01121
DYST_01122	K07267
DYST_01123	K02014
DYST_01124	K16138
DYST_01125	K18139
DYST_01126	K18138
DYST_01127	K03585
DYST_01128
DYST_01129	K12685
DYST_01130
DYST_01131	K18303
DYST_01132	K18302
DYST_01133	K18302
DYST_01134
DYST_01135
DYST_01136
DYST_01137	K14057
DYST_01138
DYST_01139
DYST_01140	K03781
DYST_01141
DYST_01142	K16137
DYST_01143
DYST_01144
DYST_01145
DYST_01146	K18893
DYST_01147
DYST_01148
DYST_01149	K05982
DYST_01150	K05802
DYST_01151
DYST_01152
DYST_01153
DYST_01154
DYST_01155
DYST_01156	K00675
DYST_01157	K07304
DYST_01158
DYST_01159
DYST_01160
DYST_01161
DYST_01162	K17836
DYST_01163	K01712
DYST_01164
DYST_01165
DYST_01166	K13529
DYST_01167	K00567
DYST_01168	K01513
DYST_01169
DYST_01170	K08224
DYST_01171
DYST_01172	K07017
DYST_01173
DYST_01174
DYST_01175
DYST_01176	K02484
DYST_01177	K07662
DYST_01178
DYST_01179
DYST_01180
DYST_01181
DYST_01182
DYST_01183
DYST_01184	K05603
DYST_01185
DYST_01186
DYST_01187	K01468
DYST_01188
DYST_01189	K16264
DYST_01190
DYST_01191	K09823
DYST_01192
DYST_01193	K02483
DYST_01194	K07644
DYST_01195	K15727
DYST_01196
DYST_01197
DYST_01198
DYST_01199
DYST_01200	K01885
DYST_01201
DYST_01202
DYST_01203
DYST_01204	K01963
DYST_01205	K01695
DYST_01206	K01696
DYST_01207
DYST_01208
DYST_01209	K01817
DYST_01210	K06173
DYST_01211	K08086
DYST_01212
DYST_01213	K00133
DYST_01214	K00015
DYST_01215	K01736
DYST_01216	K03790
DYST_01217	K07320
DYST_01218	K01613
DYST_01219
DYST_01220
DYST_01221	K06915
DYST_01222
DYST_01223	K04760
DYST_01224
DYST_01225	K02044
DYST_01226
DYST_01227	K14441
DYST_01228	K01061
DYST_01229
DYST_01230
DYST_01231	K01494
DYST_01232	K03593
DYST_01233
DYST_01234
DYST_01235
DYST_01236	K01560
DYST_01237
DYST_01238	K07038
DYST_01239	K01874
DYST_01240	K03616
DYST_01241	K10773
DYST_01242
DYST_01243
DYST_01244
DYST_01245	K07666
DYST_01246	K07645
DYST_01247	K03296
DYST_01248
DYST_01249
DYST_01250
DYST_01251	K01673
DYST_01252
DYST_01253
DYST_01254	K03683
DYST_01255	K02040
DYST_01256	K02037
DYST_01257	K02038
DYST_01258	K02036
DYST_01259	K02039
DYST_01260
DYST_01261	K11741
DYST_01263
DYST_01264	K03218
DYST_01265	K12573
DYST_01267	K15977
DYST_01268	K00344
DYST_01269
DYST_01270
DYST_01271	K11996
DYST_01272	K03636
DYST_01273	K03637
DYST_01274	K03637
DYST_01275	K03639
DYST_01276	K03750
DYST_01277	K02017
DYST_01278	K02018
DYST_01279	K02020
DYST_01280
DYST_01281	K03750
DYST_01282	K02379
DYST_01283
DYST_01284
DYST_01285
DYST_01286	K02567
DYST_01287	K02569
DYST_01288	K08234
DYST_01290	K00281
DYST_01291
DYST_01292	K13381
DYST_01293
DYST_01294
DYST_01295
DYST_01296	K08776
DYST_01297
DYST_01298
DYST_01299
DYST_01300
DYST_01301	K07451
DYST_01302	K00558
DYST_01303
DYST_01304
DYST_01305
DYST_01306	K01939
DYST_01307
DYST_01308	K04087
DYST_01309	K04088
DYST_01310	K03665
DYST_01311	K03666
DYST_01312	K00791
DYST_01313	K01673
DYST_01314
DYST_01315
DYST_01316
DYST_01317	K00060
DYST_01318
DYST_01319
DYST_01320	K00639
DYST_01321	K06178
DYST_01322	K16191
DYST_01323	K03286
DYST_01324	K01720
DYST_01325	K20455
DYST_01326	K09788
DYST_01327
DYST_01328	K00799
DYST_01329
DYST_01330
DYST_01331	K06992
DYST_01332
DYST_01333
DYST_01334	K01659
DYST_01335	K03417
DYST_01336	K01647
DYST_01337	K01908
DYST_01338
DYST_01339	K21743
DYST_01340	K00024
DYST_01341	K00812
DYST_01342
DYST_01343
DYST_01344	K03768
DYST_01345
DYST_01346
DYST_01347
DYST_01348
DYST_01349
DYST_01350
DYST_01351	K06207
DYST_01352
DYST_01353
DYST_01354
DYST_01355
DYST_01356
DYST_01357
DYST_01358	K10947
DYST_01359
DYST_01360
DYST_01361
DYST_01362
DYST_01363
DYST_01364
DYST_01365
DYST_01366
DYST_01367
DYST_01368
DYST_01369
DYST_01370
DYST_01371
DYST_01372
DYST_01373
DYST_01374
DYST_01375
DYST_01376	K18073
DYST_01377	K18072
DYST_01378
DYST_01379
DYST_01380
DYST_01381
DYST_01382
DYST_01383	K23777
DYST_01384	K03543
DYST_01385
DYST_01386
DYST_01387
DYST_01388
DYST_01389
DYST_01390
DYST_01391
DYST_01392
DYST_01393
DYST_01394
DYST_01395
DYST_01396	K01425
DYST_01397
DYST_01398	K15977
DYST_01399
DYST_01400
DYST_01401
DYST_01402	K23239
DYST_01403	K00121
DYST_01404
DYST_01405
DYST_01406	K12132
DYST_01407
DYST_01408
DYST_01409
DYST_01410	K00459
DYST_01411
DYST_01412	K11527
DYST_01413
DYST_01414	K07814
DYST_01415
DYST_01416	K09165
DYST_01417
DYST_01418
DYST_01419
DYST_01420	K00156
DYST_01421	K01214
DYST_01422
DYST_01423
DYST_01424
DYST_01425	K07290
DYST_01426
DYST_01427	K07300
DYST_01428
DYST_01429	K07118
DYST_01430
DYST_01431	K07233
DYST_01432
DYST_01433	K07115
DYST_01434
DYST_01435
DYST_01436
DYST_01437
DYST_01438	K09181
DYST_01439	K03723
DYST_01440
DYST_01441
DYST_01442
DYST_01443	K03411
DYST_01444	K00575
DYST_01445	K03406
DYST_01446
DYST_01447
DYST_01448	K19302
DYST_01449
DYST_01450
DYST_01451	K00252
DYST_01452
DYST_01453
DYST_01454
DYST_01455	K07248
DYST_01456	K03566
DYST_01457
DYST_01458	K00108
DYST_01459
DYST_01460	K07799
DYST_01461	K07788
DYST_01462
DYST_01463
DYST_01464
DYST_01465
DYST_01466
DYST_01467	K01081
DYST_01468	K00858
DYST_01469	K15371
DYST_01470	K03585
DYST_01471
DYST_01472	K11444
DYST_01473
DYST_01474
DYST_01475
DYST_01476	K00248
DYST_01477
DYST_01478	K24042
DYST_01479	K00548
DYST_01480
DYST_01482
DYST_01483	K16137
DYST_01484
DYST_01485	K14189
DYST_01486	K21698
DYST_01487	K10680
DYST_01488
DYST_01489
DYST_01490	K02556
DYST_01491	K02557
DYST_01492
DYST_01493	K06988
DYST_01494	K09771
DYST_01495
DYST_01496
DYST_01497
DYST_01498	K07658
DYST_01499	K07654
DYST_01500
DYST_01502	K03704
DYST_01503
DYST_01504
DYST_01505
DYST_01506
DYST_01507
DYST_01508	K07032
DYST_01509
DYST_01510
DYST_01511
DYST_01512
DYST_01513	K01195
DYST_01514
DYST_01515
DYST_01516
DYST_01517
DYST_01518
DYST_01519
DYST_01520
DYST_01521
DYST_01522
DYST_01523
DYST_01524
DYST_01525
DYST_01526
DYST_01527	K01008
DYST_01529	K01042
DYST_01530	K07089
DYST_01531	K02380
DYST_01532	K00127
DYST_01533	K00124
DYST_01534	K00123
DYST_01536
DYST_01537	K05499
DYST_01538
DYST_01539
DYST_01540
DYST_01541
DYST_01542
DYST_01543
DYST_01544	K01816
DYST_01545
DYST_01546
DYST_01547	K18967
DYST_01548	K01912
DYST_01549	K10254
DYST_01550
DYST_01551	K01303
DYST_01552
DYST_01553
DYST_01554	K03782
DYST_01555
DYST_01556
DYST_01557	K10209
DYST_01558
DYST_01559
DYST_01560
DYST_01561	K02557
DYST_01562
DYST_01563
DYST_01564
DYST_01565
DYST_01566
DYST_01567
DYST_01568	K19519
DYST_01569
DYST_01570
DYST_01571
DYST_01572
DYST_01573
DYST_01574
DYST_01575
DYST_01576
DYST_01577	K07304
DYST_01578
DYST_01579
DYST_01580
DYST_01581
DYST_01582
DYST_01583	K21088
DYST_01584
DYST_01585	K04046
DYST_01586	K00799
DYST_01587
DYST_01588	K03280
DYST_01589
DYST_01590	K00799
DYST_01591
DYST_01592	K01848
DYST_01593
DYST_01594
DYST_01595
DYST_01596
DYST_01597
DYST_01598	K12658
DYST_01599	K21061
DYST_01600
DYST_01601	K22549
DYST_01602	K21062
DYST_01603	K13877
DYST_01604	K01271
DYST_01605
DYST_01606	K03294
DYST_01607
DYST_01608	K09955
DYST_01609
DYST_01610	K00263
DYST_01611
DYST_01612
DYST_01613	K00253
DYST_01614
DYST_01615	K12688
DYST_01616	K00626
DYST_01617
DYST_01618	K01969
DYST_01619
DYST_01620
DYST_01621
DYST_01622
DYST_01623
DYST_01624
DYST_01625
DYST_01626	K00917
DYST_01627	K00852
DYST_01628	K02082
DYST_01629	K11645
DYST_01630
DYST_01631	K02081
DYST_01632
DYST_01633	K04045
DYST_01634
DYST_01635
DYST_01636
DYST_01637
DYST_01638
DYST_01639
DYST_01640
DYST_01641	K04759
DYST_01642
DYST_01643
DYST_01644	K13766
DYST_01645
DYST_01646
DYST_01647	K01968
DYST_01648
DYST_01649
DYST_01650
DYST_01651	K01640
DYST_01652	K07718
DYST_01653
DYST_01654
DYST_01655
DYST_01656	K03828
DYST_01657
DYST_01658	K03829
DYST_01659	K24217
DYST_01660	K08683
DYST_01661	K02356
DYST_01662	K11066
DYST_01663
DYST_01664
DYST_01665	K03392
DYST_01666
DYST_01667	K01556
DYST_01668
DYST_01669
DYST_01670
DYST_01671	K00147
DYST_01672	K00931
DYST_01673
DYST_01674	K01755
DYST_01675	K00145
DYST_01676	K12659
DYST_01677	K01438
DYST_01678
DYST_01679	K01940
DYST_01680
DYST_01681	K07734
DYST_01682	K00611
DYST_01683
DYST_01684	K01883
DYST_01685	K02426
DYST_01686	K06204
DYST_01687	K01465
DYST_01688
DYST_01689	K09914
DYST_01690	K09007
DYST_01691
DYST_01692	K22292
DYST_01693	K00568
DYST_01694
DYST_01695	K12960
DYST_01696	K02356
DYST_01697	K19810
DYST_01698	K21025
DYST_01699	K02884
DYST_01700	K00554
DYST_01701	K02860
DYST_01702	K03106
DYST_01703
DYST_01704	K01433
DYST_01705
DYST_01706
DYST_01707	K04485
DYST_01708	K01775
DYST_01709
DYST_01710
DYST_01711	K02314
DYST_01712	K02939
DYST_01713	K02963
DYST_01714	K02990
DYST_01715	K13628
DYST_01716	K01893
DYST_01717
DYST_01718
DYST_01719	K00059
DYST_01720	K23234
DYST_01721	K01673
DYST_01722
DYST_01723
DYST_01724	K01458
DYST_01725	K00383
DYST_01726	K00285
DYST_01727	K00285
DYST_01728
DYST_01729
DYST_01730	K23775
DYST_01731	K04063
DYST_01732
DYST_01733	K08178
DYST_01734
DYST_01735	K11927
DYST_01736
DYST_01737	K03790
DYST_01738	K01070
DYST_01739	K16066
DYST_01740	K05592
DYST_01741
DYST_01742	K15777
DYST_01743
DYST_01744
DYST_01745	K03088
DYST_01746
DYST_01747
DYST_01748	K06940
DYST_01749	K07054
DYST_01750	K00799
DYST_01751
DYST_01752
DYST_01753	K06287
DYST_01754	K18118
DYST_01755
DYST_01756	K00783
DYST_01757	K09710
DYST_01758
DYST_01759
DYST_01760	K03088
DYST_01761
DYST_01762
DYST_01763
DYST_01764	K07305
DYST_01765	K00969
DYST_01766	K02340
DYST_01767
DYST_01768	K01869
DYST_01769
DYST_01770	K06192
DYST_01771	K03808
DYST_01772
DYST_01773	K05838
DYST_01774
DYST_01775
DYST_01776
DYST_01777	K03088
DYST_01778
DYST_01779	K06324
DYST_01780
DYST_01781
DYST_01782	K07386
DYST_01783	K00077
DYST_01784	K16090
DYST_01785	K07336
DYST_01786	K02655
DYST_01787
DYST_01788
DYST_01789
DYST_01790
DYST_01791
DYST_01792	K03580
DYST_01793
DYST_01794	K25316
DYST_01795	K03293
DYST_01796	K09650
DYST_01797	K02014
DYST_01798
DYST_01799	K01759
DYST_01800
DYST_01801	K19303
DYST_01802	K06997
DYST_01803
DYST_01804	K02237
DYST_01805
DYST_01806
DYST_01807
DYST_01808	K00380
DYST_01809
DYST_01810	K03734
DYST_01811
DYST_01812
DYST_01813
DYST_01814	K07771
DYST_01815	K07645
DYST_01816
DYST_01817
DYST_01818
DYST_01819	K00823
DYST_01820	K08966
DYST_01821
DYST_01822	K25169
DYST_01823	K02003
DYST_01824
DYST_01825
DYST_01826
DYST_01827	K05710
DYST_01828
DYST_01829
DYST_01830
DYST_01831	K02483
DYST_01832
DYST_01833
DYST_01834	K09012
DYST_01835	K07386
DYST_01836
DYST_01837	K06872
DYST_01838	K09712
DYST_01839	K01593
DYST_01840	K11717
DYST_01841	K09015
DYST_01842	K09013
DYST_01843	K09014
DYST_01844	K13772
DYST_01845	K04751
DYST_01846	K03320
DYST_01847	K07102
DYST_01848	K00992
DYST_01849
DYST_01850
DYST_01851
DYST_01852
DYST_01853
DYST_01854	K03074
DYST_01855
DYST_01856	K03072
DYST_01857	K03210
DYST_01858	K00773
DYST_01859
DYST_01860
DYST_01861
DYST_01862
DYST_01863
DYST_01864
DYST_01865
DYST_01866
DYST_01867
DYST_01868
DYST_01869
DYST_01870
DYST_01871
DYST_01872
DYST_01873
DYST_01874
DYST_01875
DYST_01876
DYST_01877
DYST_01878
DYST_01879
DYST_01880
DYST_01881
DYST_01882
DYST_01883
DYST_01884
DYST_01885
DYST_01886	K18698
DYST_01887
DYST_01888
DYST_01889
DYST_01890
DYST_01891
DYST_01892
DYST_01893
DYST_01894
DYST_01895
DYST_01896
DYST_01897
DYST_01898
DYST_01899
DYST_01900	K07148
DYST_01901
DYST_01902
DYST_01903
DYST_01904
DYST_01905	K07568
DYST_01906
DYST_01907
DYST_01908	K07693
DYST_01909	K07778
DYST_01910
DYST_01911	K01992
DYST_01912	K01990
DYST_01913
DYST_01914	K07004
DYST_01915
DYST_01916
DYST_01917	K00761
DYST_01918
DYST_01919
DYST_01920	K01259
DYST_01921
DYST_01922
DYST_01923	K00058
DYST_01925
DYST_01926	K04764
DYST_01927	K01890
DYST_01928	K01889
DYST_01929	K02887
DYST_01930	K02916
DYST_01931	K02520
DYST_01932	K01868
DYST_01933	K08679
DYST_01934	K08973
DYST_01936	K03702
DYST_01937
DYST_01938
DYST_01939	K06905
DYST_01940
DYST_01941
DYST_01943	K06966
DYST_01944
DYST_01945
DYST_01946
DYST_01947
DYST_01948
DYST_01949
DYST_01950	K07390
DYST_01951	K04564
DYST_01952	K01589
DYST_01953	K01588
DYST_01954
DYST_01955
DYST_01956	K00767
DYST_01957
DYST_01958
DYST_01959	K03600
DYST_01960	K03599
DYST_01961	K00413
DYST_01962	K00412
DYST_01963	K00411
DYST_01964	K04691
DYST_01965
DYST_01966	K06168
DYST_01967
DYST_01968	K06217
DYST_01969	K07042
DYST_01970
DYST_01971
DYST_01972	K06189
DYST_01973
DYST_01974
DYST_01975	K03284
DYST_01976
DYST_01977
DYST_01978
DYST_01979	K02650
DYST_01980
DYST_01981	K23424
DYST_01982
DYST_01983
DYST_01984
DYST_01985
DYST_01986
DYST_01987
DYST_01988	K01791
DYST_01989	K00721
DYST_01990
DYST_01991	K02652
DYST_01992	K02653
DYST_01993	K02654
DYST_01994	K19353
DYST_01995	K00859
DYST_01996	K03574
DYST_01997	K00287
DYST_01998	K00560
DYST_01999	K13292
DYST_02000
DYST_02001
DYST_02002
DYST_02003
DYST_02004
DYST_02005	K06872
DYST_02006	K03744
DYST_02007	K00901
DYST_02008	K03305
DYST_02009	K15011
DYST_02010	K15012
DYST_02011	K13051
DYST_02012	K01027
DYST_02013
DYST_02014	K02483
DYST_02015	K10804
DYST_02016	K02003
DYST_02017	K02004
DYST_02018
DYST_02019
DYST_02020
DYST_02021	K04765
DYST_02022	K01082
DYST_02023	K08312
DYST_02024
DYST_02025
DYST_02026
DYST_02027
DYST_02028	K00833
DYST_02029
DYST_02030	K09761
[truncated: 2,844 more rows]

## Sheet: Pathways
Identified KEGG pathways (numbers of associated K# in parentheses)
00010 Glycolysis / Gluconeogenesis (30)
00020 Citrate cycle (TCA cycle) (19)
00030 Pentose phosphate pathway (22)
00040 Pentose and glucuronate interconversions (10)
00051 Fructose and mannose metabolism (13)
00052 Galactose metabolism (15)
00053 Ascorbate and aldarate metabolism (6)
00500 Starch and sucrose metabolism (17)
00520 Amino sugar and nucleotide sugar metabolism (32)
00620 Pyruvate metabolism (31)
00630 Glyoxylate and dicarboxylate metabolism (30)
00640 Propanoate metabolism (26)
00650 Butanoate metabolism (19)
00660 C5-Branched dibasic acid metabolism (7)
00562 Inositol phosphate metabolism (3)
00190 Oxidative phosphorylation (47)
00195 Photosynthesis (8)
00710 Carbon fixation in photosynthetic organisms (12)
00720 Carbon fixation pathways in prokaryotes (22)
00680 Methane metabolism (18)
00910 Nitrogen metabolism (8)
00920 Sulfur metabolism (16)
00061 Fatty acid biosynthesis (12)
00071 Fatty acid degradation (14)
00100 Steroid biosynthesis (2)
00120 Primary bile acid biosynthesis (2)
00121 Secondary bile acid biosynthesis (1)
00140 Steroid hormone biosynthesis (1)
00561 Glycerolipid metabolism (12)
00564 Glycerophospholipid metabolism (17)
00565 Ether lipid metabolism (2)
00600 Sphingolipid metabolism (3)
00590 Arachidonic acid metabolism (3)
00591 Linoleic acid metabolism (2)
00592 alpha-Linolenic acid metabolism (2)
01040 Biosynthesis of unsaturated fatty acids (4)
00230 Purine metabolism (44)
00240 Pyrimidine metabolism (30)
00250 Alanine, aspartate and glutamate metabolism (22)
00260 Glycine, serine and threonine metabolism (33)
00270 Cysteine and methionine metabolism (36)
00280 Valine, leucine and isoleucine degradation (23)
00290 Valine, leucine and isoleucine biosynthesis (12)
00300 Lysine biosynthesis (13)
00310 Lysine degradation (10)
00220 Arginine biosynthesis (13)
00330 Arginine and proline metabolism (19)
00340 Histidine metabolism (18)
00350 Tyrosine metabolism (12)
00360 Phenylalanine metabolism (10)
00380 Tryptophan metabolism (17)
00400 Phenylalanine, tyrosine and tryptophan biosynthesis (19)
00410 beta-Alanine metabolism (9)
00430 Taurine and hypotaurine metabolism (3)
00440 Phosphonate and phosphinate metabolism (1)
00450 Selenocompound metabolism (13)
00460 Cyanoamino acid metabolism (4)
00470 D-Amino acid metabolism (16)
00480 Glutathione metabolism (17)
00510 N-Glycan biosynthesis (1)
00513 Various types of N-glycan biosynthesis (1)
00514 Other types of O-glycan biosynthesis (1)
00531 Glycosaminoglycan degradation (5)
00603 Glycosphingolipid biosynthesis - globo and isoglobo series (2)
00604 Glycosphingolipid biosynthesis - ganglio series (1)
00540 Lipopolysaccharide biosynthesis (16)
00541 O-Antigen nucleotide sugar biosynthesis (16)
00550 Peptidoglycan biosynthesis (20)
00511 Other glycan degradation (5)
00730 Thiamine metabolism (9)
00740 Riboflavin metabolism (10)
00750 Vitamin B6 metabolism (7)
00760 Nicotinate and nicotinamide metabolism (17)
00770 Pantothenate and CoA biosynthesis (18)
00780 Biotin metabolism (10)
00785 Lipoic acid metabolism (2)
00790 Folate biosynthesis (21)
00670 One carbon pool by folate (13)
00830 Retinol metabolism (3)
00860 Porphyrin metabolism (26)
00130 Ubiquinone and other terpenoid-quinone biosynthesis (10)
00900 Terpenoid backbone biosynthesis (15)
00909 Sesquiterpenoid and triterpenoid biosynthesis (2)
00906 Carotenoid biosynthesis (2)
00981 Insect hormone biosynthesis (1)
00908 Zeatin biosynthesis (1)
00903 Limonene and pinene degradation (2)
00281 Geraniol degradation (5)
01051 Biosynthesis of ansamycins (1)
00523 Polyketide sugar unit biosynthesis (4)
01054 Nonribosomal peptide structures (1)
01055 Biosynthesis of vancomycin group antibiotics (1)
00940 Phenylpropanoid biosynthesis (1)
00944 Flavone and flavonol biosynthesis (1)
00901 Indole alkaloid biosynthesis (1)
00950 Isoquinoline alkaloid biosynthesis (3)
00960 Tropane, piperidine and pyridine alkaloid biosynthesis (4)
00965 Betalain biosynthesis (2)
00966 Glucosinolate biosynthesis (2)
00311 Penicillin and cephalosporin biosynthesis (2)
00332 Carbapenem biosynthesis (2)
00261 Monobactam biosynthesis (9)
00521 Streptomycin biosynthesis (8)
00524 Neomycin, kanamycin and gentamicin biosynthesis (1)
00525 Acarbose and validamycin biosynthesis (2)
00401 Novobiocin biosynthesis (3)
00405 Phenazine biosynthesis (4)
00333 Prodigiosin biosynthesis (2)
00998 Biosynthesis of various antibiotics (1)
00999 Biosynthesis of various plant secondary metabolites (3)
00362 Benzoate degradation (7)
00627 Aminobenzoate degradation (1)
00364 Fluorobenzoate degradation (2)
00625 Chloroalkane and chloroalkene degradation (4)
00361 Chlorocyclohexane and chlorobenzene degradation (2)
00623 Toluene degradation (1)
00622 Xylene degradation (1)
00633 Nitrotoluene degradation (1)
00642 Ethylbenzene degradation (1)
00643 Styrene degradation (2)
00930 Caprolactam degradation (1)
00626 Naphthalene degradation (2)
00980 Metabolism of xenobiotics by cytochrome P450 (4)
00982 Drug metabolism - cytochrome P450 (4)
00983 Drug metabolism - other enzymes (11)
03020 RNA polymerase (4)
03010 Ribosome (51)
00970 Aminoacyl-tRNA biosynthesis (25)
03008 Ribosome biogenesis in eukaryotes (3)
03060 Protein export (12)
04141 Protein processing in endoplasmic reticulum (1)
04120 Ubiquitin mediated proteolysis (2)
04122 Sulfur relay system (8)
03018 RNA degradation (16)
03030 DNA replication (14)
03410 Base excision repair (12)
03420 Nucleotide excision repair (7)
03430 Mismatch repair (16)
03440 Homologous recombination (22)
03450 Non-homologous end-joining (1)
02010 ABC transporters (37)
02060 Phosphotransferase system (PTS) (3)
03070 Bacterial secretion system (29)
02020 Two-component system (109)
04013 MAPK signaling pathway - fly (1)
04016 MAPK signaling pathway - plant (3)
04011 MAPK signaling pathway - yeast (1)
04630 JAK-STAT signaling pathway (1)
04066 HIF-1 signaling pathway (4)
04068 FoxO signaling pathway (3)
04020 Calcium signaling pathway (1)
04070 Phosphatidylinositol signaling system (3)
04072 Phospholipase D signaling pathway (1)
04151 PI3K-Akt signaling pathway (2)
04152 AMPK signaling pathway (4)
04150 mTOR signaling pathway (1)
04142 Lysosome (9)
04146 Peroxisome (9)
04138 Autophagy - yeast (1)
04137 Mitophagy - animal (1)
04110 Cell cycle (1)
04111 Cell cycle - yeast (1)
04112 Cell cycle - Caulobacter (13)
04113 Meiosis - yeast (2)
04114 Oocyte meiosis (1)
04210 Apoptosis (2)
04214 Apoptosis - fly (1)
04215 Apoptosis - multiple species (1)
04216 Ferroptosis (2)
04217 Necroptosis (2)
04115 p53 signaling pathway (2)
02024 Quorum sensing (32)
05111 Biofilm formation - Vibrio cholerae (14)
02025 Biofilm formation - Pseudomonas aeruginosa (29)
02026 Biofilm formation - Escherichia coli (16)
02030 Bacterial chemotaxis (15)
02040 Flagellar assembly (34)
04624 Toll and Imd signaling pathway (1)
04621 NOD-like receptor signaling pathway (3)
04612 Antigen processing and presentation (1)
04659 Th17 cell differentiation (1)
04657 IL-17 signaling pathway (1)
04910 Insulin signaling pathway (2)
04922 Glucagon signaling pathway (4)
04923 Regulation of lipolysis in adipocytes (1)
04920 Adipocytokine signaling pathway (2)
03320 PPAR signaling pathway (9)
04915 Estrogen signaling pathway (1)
04914 Progesterone-mediated oocyte maturation (2)
04921 Oxytocin signaling pathway (1)
04918 Thyroid hormone synthesis (2)
04919 Thyroid hormone signaling pathway (1)
04614 Renin-angiotensin system (1)
04260 Cardiac muscle contraction (4)
04970 Salivary secretion (1)
04972 Pancreatic secretion (1)
04973 Carbohydrate digestion and absorption (1)
04974 Protein digestion and absorption (1)
04975 Fat digestion and absorption (1)
04978 Mineral absorption (1)
04964 Proximal tubule bicarbonate reclamation (2)
04724 Glutamatergic synapse (2)
04727 GABAergic synapse (2)
04728 Dopaminergic synapse (1)
04726 Serotonergic synapse (1)
04723 Retrograde endocannabinoid signaling (1)
04361 Axon regeneration (2)
04211 Longevity regulating pathway (2)
04212 Longevity regulating pathway - worm (7)
04213 Longevity regulating pathway - multiple species (3)
04714 Thermogenesis (7)
04626 Plant-pathogen interaction (7)
05200 Pathways in cancer (4)
05206 MicroRNAs in cancer (2)
05205 Proteoglycans in cancer (2)
05204 Chemical carcinogenesis - DNA adducts (1)
05207 Chemical carcinogenesis - receptor activation (2)
05208 Chemical carcinogenesis - reactive oxygen species (6)
05203 Viral carcinogenesis (1)
05230 Central carbon metabolism in cancer (6)
05231 Choline metabolism in cancer (1)
05210 Colorectal cancer (1)
05225 Hepatocellular carcinoma (1)
05211 Renal cell carcinoma (1)
05215 Prostate cancer (1)
05222 Small cell lung cancer (1)
05166 Human T-cell leukemia virus 1 infection (1)
05170 Human immunodeficiency virus 1 infection (1)
05161 Hepatitis B (1)
05160 Hepatitis C (1)
05164 Influenza A (1)
05162 Measles (1)
05168 Herpes simplex virus 1 infection (1)
05163 Human cytomegalovirus infection (1)
05167 Kaposi sarcoma-associated herpesvirus infection (2)
05169 Epstein-Barr virus infection (1)
05165 Human papillomavirus infection (1)
05120 Epithelial cell signaling in Helicobacter pylori infection (1)
05130 Pathogenic Escherichia coli infection (2)
05132 Salmonella infection (5)
05131 Shigellosis (3)
05133 Pertussis (4)
05134 Legionellosis (5)
05150 Staphylococcus aureus infection (1)
05152 Tuberculosis (4)
05146 Amoebiasis (1)
05145 Toxoplasmosis (1)
05340 Primary immunodeficiency (1)
05010 Alzheimer disease (6)
05012 Parkinson disease (6)
05014 Amyotrophic lateral sclerosis (6)
05016 Huntington disease (6)
05017 Spinocerebellar ataxia (1)
05020 Prion disease (4)
05022 Pathways of neurodegeneration - multiple diseases (8)
05030 Cocaine addiction (1)
05031 Amphetamine addiction (1)
05034 Alcoholism (1)
05417 Lipid and atherosclerosis (4)
05418 Fluid shear stress and atherosclerosis (4)
05415 Diabetic cardiomyopathy (7)
05416 Viral myocarditis (1)
04930 Type II diabetes mellitus (1)
04940 Type I diabetes mellitus (1)
04936 Alcoholic liver disease (5)
04932 Non-alcoholic fatty liver disease (4)
04931 Insulin resistance (3)
04934 Cushing syndrome (1)
01501 beta-Lactam resistance (15)
01502 Vancomycin resistance (6)
01503 Cationic antimicrobial peptide (CAMP) resistance (13)
01524 Platinum drug resistance (3)
01523 Antifolate resistance (4)

## Sheet: Level 1- Metabolism
Level 1 KEGG Annotations for Metabolism
A09100	Metabolism
B
B	9101	Carbohydrate	metabolism
C	10	Glycolysis	/	Gluconeogenesis	[PATH:ko00010]
D	DYST_02793;	K00845	glk;	glucokinase	[EC:2.7.1.2]
D	DYST_02843;	K00845	glk;	glucokinase	[EC:2.7.1.2]
D	DYST_02853;	K00845	glk;	glucokinase	[EC:2.7.1.2]
D	DYST_00301;	K01810	GPI,	pgi;	glucose-6-phosphate	isomerase	[EC:5.3.1.9]
D	DYST_04621;	K01810	GPI,	pgi;	glucose-6-phosphate	isomerase	[EC:5.3.1.9]
D	DYST_02416;	K21071	pfk,	pfp;	ATP-dependent	phosphofructokinase	/	diphosphate-dependent	phosphofructokinase	[EC:2.7.1.11	2.7.1.90]
D	DYST_03067;	K03841	FBP,	fbp;	fructose-1,6-bisphosphatase	I	[EC:3.1.3.11]
D	DYST_02156;	K01623	ALDO;	fructose-bisphosphate	aldolase,	class	I	[EC:4.1.2.13]
D	DYST_01629;	K11645	fbaB;	fructose-bisphosphate	aldolase,	class	I	[EC:4.1.2.13]
D	DYST_00274;	K01803	TPI,	tpiA;	triosephosphate	isomerase	(TIM)	[EC:5.3.1.1]
D	DYST_02161;	K00134	GAPDH,	gapA;	glyceraldehyde	3-phosphate	dehydrogenase	(phosphorylating)	[EC:1.2.1.12]
D	DYST_02151;	K00927	PGK,	pgk;	phosphoglycerate	kinase	[EC:2.7.2.3]
D	DYST_03275;	K01834	PGAM,	gpmA;	2,3-bisphosphoglycerate-dependent	phosphoglycerate	mutase	[EC:5.4.2.11]
D	DYST_01031;	K01689	ENO,	eno;	enolase	[EC:4.2.1.11]
D	DYST_02158;	K00873	PK,	pyk;	pyruvate	kinase	[EC:2.7.1.40]
D	DYST_00374;	K01007	pps,	ppsA;	pyruvate,	water	dikinase	[EC:2.7.9.2]
D	DYST_00888;	K01007	pps,	ppsA;	pyruvate,	water	dikinase	[EC:2.7.9.2]
D	DYST_03608;	K00163	aceE;	pyruvate	dehydrogenase	E1	component	[EC:1.2.4.1]
D	DYST_03634;	K00627	DLAT,	aceF,	pdhC;	pyruvate	dehydrogenase	E2	component	(dihydrolipoamide	acetyltransferase)	[EC:2.3.1.12]
D	DYST_00022;	K00382	DLD,	lpd,	pdhD;	dihydrolipoamide	dehydrogenase	[EC:1.8.1.4]
D	DYST_03635;	K00382	DLD,	lpd,	pdhD;	dihydrolipoamide	dehydrogenase	[EC:1.8.1.4]
D	DYST_01403;	K00121	frmA,	ADH5,	adhC;	S-(hydroxymethyl)glutathione	dehydrogenase	/	alcohol	dehydrogenase	[EC:1.1.1.284	1.1.1.1]
D	DYST_04774;	K13953	adhP;	alcohol	dehydrogenase,	propanol-preferring	[EC:1.1.1.1]
D	DYST_04238;	K12957	ahr;	alcohol/geraniol	dehydrogenase	(NADP+)	[EC:1.1.1.2	1.1.1.183]
D	DYST_00841;	K13979	yahK;	alcohol	dehydrogenase	(NADP+)	[EC:1.1.1.2]
D	DYST_02787;	K22474	adhB;	alcohol	dehydrogenase	(quinone),	cytochrome	c	subunit	[EC:1.1.5.5]
D	DYST_00669;	K00128	ALDH;	aldehyde	dehydrogenase	(NAD+)	[EC:1.2.1.3]
D	DYST_01095;	K00128	ALDH;	aldehyde	dehydrogenase	(NAD+)	[EC:1.2.1.3]
D	DYST_04799;	K14085	ALDH7A1;	aldehyde	dehydrogenase	family	7	member	A1	[EC:1.2.1.31	1.2.1.8	1.2.1.3]
D	DYST_03077;	K01895	ACSS1_2,	acs;	acetyl-CoA	synthetase	[EC:6.2.1.1]
D	DYST_00571;	K01785	galM,	GALM;	aldose	1-epimerase	[EC:5.1.3.3]
D	DYST_02941;	K01785	galM,	GALM;	aldose	1-epimerase	[EC:5.1.3.3]
D	DYST_00700;	K01085	agp;	glucose-1-phosphatase	[EC:3.1.3.10]
D	DYST_00302;	K01835	pgm;	phosphoglucomutase	[EC:5.4.2.2]
D	DYST_00762;	K01835	pgm;	phosphoglucomutase	[EC:5.4.2.2]
D	DYST_02974;	K15778	pmm-pgm;	phosphomannomutase	/	phosphoglucomutase	[EC:5.4.2.8	5.4.2.2]
D	DYST_02091;	K01596	E4.1.1.32,	pckA,	PCK;	phosphoenolpyruvate	carboxykinase	(GTP)	[EC:4.1.1.32]
D	DYST_02877;	K01223	E3.2.1.86B,	bglA;	6-phospho-beta-glucosidase	[EC:3.2.1.86]
C	20	Citrate	cycle	(TCA	cycle)	[PATH:ko00020]
D	DYST_01336;	K01647	CS,	gltA;	citrate	synthase	[EC:2.3.3.1]
D	DYST_03785;	K01647	CS,	gltA;	citrate	synthase	[EC:2.3.3.1]
D	DYST_00261;	K01681	ACO,	acnA;	aconitate	hydratase	[EC:4.2.1.3]
D	DYST_00264;	K01682	acnB;	aconitate	hydratase	2	/	2-methylisocitrate	dehydratase	[EC:4.2.1.3	4.2.1.99]
D	DYST_03364;	K00031	IDH1,	IDH2,	icd;	isocitrate	dehydrogenase	[EC:1.1.1.42]
D	DYST_04603;	K00030	IDH3;	isocitrate	dehydrogenase	(NAD+)	[EC:1.1.1.41]
D	DYST_00024;	K00164	OGDH,	sucA;	2-oxoglutarate	dehydrogenase	E1	component	[EC:1.2.4.2]
D	DYST_00023;	K00658	DLST,	sucB;	2-oxoglutarate	dehydrogenase	E2	component	(dihydrolipoamide	succinyltransferase)	[EC:2.3.1.61]
D	DYST_00022;	K00382	DLD,	lpd,	pdhD;	dihydrolipoamide	dehydrogenase	[EC:1.8.1.4]
D	DYST_03635;	K00382	DLD,	lpd,	pdhD;	dihydrolipoamide	dehydrogenase	[EC:1.8.1.4]
D	DYST_03987;	K01902	sucD;	succinyl-CoA	synthetase	alpha	subunit	[EC:6.2.1.5]
D	DYST_03986;	K01903	sucC;	succinyl-CoA	synthetase	beta	subunit	[EC:6.2.1.5]
D	DYST_01754;	K18118	aarC,	cat1;	succinyl-CoA:acetate	CoA-transferase	[EC:2.8.3.18]
D	DYST_04861;	K00239	sdhA,	frdA;	succinate	dehydrogenase	/	fumarate	reductase,	flavoprotein	subunit	[EC:1.3.5.1	1.3.5.4]
D	DYST_04862;	K00240	sdhB,	frdB;	succinate	dehydrogenase	/	fumarate	reductase,	iron-sulfur	subunit	[EC:1.3.5.1	1.3.5.4]
D	DYST_04859;	K00241	sdhC,	frdC;	succinate	dehydrogenase	/	fumarate	reductase,	cytochrome	b	subunit
D	DYST_04860;	K00242	sdhD,	frdD;	succinate	dehydrogenase	/	fumarate	reductase,	membrane	anchor	subunit
D	DYST_04091;	K01676	E4.2.1.2A,	fumA,	fumB;	fumarate	hydratase,	class	I	[EC:4.2.1.2]
D	DYST_00039;	K01679	E4.2.1.2B,	fumC,	FH;	fumarate	hydratase,	class	II	[EC:4.2.1.2]
D	DYST_01340;	K00024	mdh;	malate	dehydrogenase	[EC:1.1.1.37]
D	DYST_02091;	K01596	E4.1.1.32,	pckA,	PCK;	phosphoenolpyruvate	carboxykinase	(GTP)	[EC:4.1.1.32]
D	DYST_03608;	K00163	aceE;	pyruvate	dehydrogenase	E1	component	[EC:1.2.4.1]
D	DYST_03634;	K00627	DLAT,	aceF,	pdhC;	pyruvate	dehydrogenase	E2	component	(dihydrolipoamide	acetyltransferase)	[EC:2.3.1.12]
C	30	Pentose	phosphate	pathway	[PATH:ko00030]
D	DYST_00301;	K01810	GPI,	pgi;	glucose-6-phosphate	isomerase	[EC:5.3.1.9]
D	DYST_04621;	K01810	GPI,	pgi;	glucose-6-phosphate	isomerase	[EC:5.3.1.9]
D	DYST_00298;	K00036	G6PD,	zwf;	glucose-6-phosphate	1-dehydrogenase	[EC:1.1.1.49	1.1.1.363]
D	DYST_03176;	K00036	G6PD,	zwf;	glucose-6-phosphate	1-dehydrogenase	[EC:1.1.1.49	1.1.1.363]
D	DYST_03177;	K01057	PGLS,	pgl,	devB;	6-phosphogluconolactonase	[EC:3.1.1.31]
D	DYST_00304;	K00033	PGD,	gnd,	gntZ;	6-phosphogluconate	dehydrogenase	[EC:1.1.1.44	1.1.1.343]
D	DYST_02809;	K00033	PGD,	gnd,	gntZ;	6-phosphogluconate	dehydrogenase	[EC:1.1.1.44	1.1.1.343]
D	DYST_03652;	K01783	rpe,	RPE;	ribulose-phosphate	3-epimerase	[EC:5.1.3.1]
D	DYST_00303;	K00615	E2.2.1.1,	tktA,	tktB;	transketolase	[EC:2.2.1.1]
D	DYST_02154;	K00615	E2.2.1.1,	tktA,	tktB;	transketolase	[EC:2.2.1.1]
D	DYST_02862;	K00615	E2.2.1.1,	tktA,	tktB;	transketolase	[EC:2.2.1.1]
D	DYST_00300;	K00616	E2.2.1.2,	talA,	talB;	transaldolase	[EC:2.2.1.2]
D	DYST_02296;	K00616	E2.2.1.2,	talA,	talB;	transaldolase	[EC:2.2.1.2]
D	DYST_03691;	K01807	rpiA;	ribose	5-phosphate	isomerase	A	[EC:5.3.1.6]
D	DYST_01627;	K00852	rbsK,	RBKS;	ribokinase	[EC:2.7.1.15]
D	DYST_03098;	K00852	rbsK,	RBKS;	ribokinase	[EC:2.7.1.15]
D	DYST_00302;	K01835	pgm;	phosphoglucomutase	[EC:5.4.2.2]
D	DYST_00762;	K01835	pgm;	phosphoglucomutase	[EC:5.4.2.2]
D	DYST_02974;	K15778	pmm-pgm;	phosphomannomutase	/	phosphoglucomutase	[EC:5.4.2.8	5.4.2.2]
D	DYST_04396;	K00948	PRPS,	prsA;	ribose-phosphate	pyrophosphokinase	[EC:2.7.6.1]
D	DYST_03178;	K01690	edd;	phosphogluconate	dehydratase	[EC:4.2.1.12]
D	DYST_03179;	K01625	eda;	2-dehydro-3-deoxyphosphogluconate	aldolase	/	(4S)-4-hydroxy-2-oxoglutarate	aldolase	[EC:4.1.2.14	4.1.3.42]
D	DYST_03487;	K00034	gdh;	glucose	1-dehydrogenase	[EC:1.1.1.47]
D	DYST_02786;	K06151	E1.1.99.3A;	gluconate	2-dehydrogenase	alpha	chain	[EC:1.1.99.3]
D	DYST_02785;	K06152	E1.1.99.3G;	gluconate	2-dehydrogenase	gamma	chain	[EC:1.1.99.3]
D	DYST_03941;	K00851	idnK,	gntK;	gluconokinase	[EC:2.7.1.12]
D	DYST_02156;	K01623	ALDO;	fructose-bisphosphate	aldolase,	class	I	[EC:4.1.2.13]
D	DYST_01629;	K11645	fbaB;	fructose-bisphosphate	aldolase,	class	I	[EC:4.1.2.13]
D	DYST_03067;	K03841	FBP,	fbp;	fructose-1,6-bisphosphatase	I	[EC:3.1.3.11]
D	DYST_02416;	K21071	pfk,	pfp;	ATP-dependent	phosphofructokinase	/	diphosphate-dependent	phosphofructokinase	[EC:2.7.1.11	2.7.1.90]
C	40	Pentose	and	glucuronate	interconversions	[PATH:ko00040]
D	DYST_01513;	K01195	uidA,	GUSB;	beta-glucuronidase	[EC:3.2.1.31]
D	DYST_00880;	K00012	UGDH,	ugd;	UDPglucose	6-dehydrogenase	[EC:1.1.1.22]
D	DYST_02127;	K00012	UGDH,	ugd;	UDPglucose	6-dehydrogenase	[EC:1.1.1.22]
D	DYST_00121;	K00963	UGP2,	galU,	galF;	UTP--glucose-1-phosphate	uridylyltransferase	[EC:2.7.7.9]
D	DYST_03652;	K01783	rpe,	RPE;	ribulose-phosphate	3-epimerase	[EC:5.1.3.1]
D	DYST_00359;	K00854	xylB,	XYLB;	xylulokinase	[EC:2.7.1.17]
D	DYST_00360;	K01805	xylA;	xylose	isomerase	[EC:5.3.1.5]
D	DYST_03391;	K22185	xylB;	D-xylose	1-dehydrogenase	[EC:1.1.1.175]
D	DYST_04224;	K00078	DHDH;	dihydrodiol	dehydrogenase	/	D-xylose	1-dehydrogenase	(NADP)	[EC:1.3.1.20	1.1.1.179]
D	DYST_01603;	K13877	aldH;	2,5-dioxopentanoate	dehydrogenase	[EC:1.2.1.26]
D	DYST_02459;	K01628	fucA;	L-fuculose-phosphate	aldolase	[EC:4.1.2.17]
C	51	Fructose	and	mannose	metabolism	[PATH:ko00051]
D	DYST_03969;	K00847	E2.7.1.4,	scrK;	fructokinase	[EC:2.7.1.4]
D	DYST_02142;	K16011	algA,	xanB,	rfbA,	wbpW,	pslB;	mannose-1-phosphate	guanylyltransferase	/	mannose-6-phosphate	isomerase	[EC:2.7.7.13	5.3.1.8]
D	DYST_02121;	K01840	manB;	phosphomannomutase	[EC:5.4.2.8]
D	DYST_02974;	K15778	pmm-pgm;	phosphomannomutase	/	phosphoglucomutase	[EC:5.4.2.8	5.4.2.2]
D	DYST_02459;	K01628	fucA;	L-fuculose-phosphate	aldolase	[EC:4.1.2.17]
D	DYST_02416;	K21071	pfk,	pfp;	ATP-dependent	phosphofructokinase	/	diphosphate-dependent	phosphofructokinase	[EC:2.7.1.11	2.7.1.90]
D	DYST_03067;	K03841	FBP,	fbp;	fructose-1,6-bisphosphatase	I	[EC:3.1.3.11]
D	DYST_00360;	K01805	xylA;	xylose	isomerase	[EC:5.3.1.5]
D	DYST_02156;	K01623	ALDO;	fructose-bisphosphate	aldolase,	class	I	[EC:4.1.2.13]
D	DYST_01629;	K11645	fbaB;	fructose-bisphosphate	aldolase,	class	I	[EC:4.1.2.13]
D	DYST_00274;	K01803	TPI,	tpiA;	triosephosphate	isomerase	(TIM)	[EC:5.3.1.1]
D	DYST_04128;	K02793	manXa;	mannose	PTS	system	EIIA	component	[EC:2.7.1.191]
D	DYST_02795;	K19270	hxpA;	mannitol-1-/sugar-/sorbitol-6-phosphatase	[EC:3.1.3.22	3.1.3.23	3.1.3.50]
C	52	Galactose	metabolism	[PATH:ko00052]
D	DYST_00571;	K01785	galM,	GALM;	aldose	1-epimerase	[EC:5.1.3.3]
D	DYST_02941;	K01785	galM,	GALM;	aldose	1-epimerase	[EC:5.1.3.3]
D	DYST_00945;	K01784	galE,	GALE;	UDP-glucose	4-epimerase	[EC:5.1.3.2]
D	DYST_02218;	K01784	galE,	GALE;	UDP-glucose	4-epimerase	[EC:5.1.3.2]
D	DYST_03208;	K01784	galE,	GALE;	UDP-glucose	4-epimerase	[EC:5.1.3.2]
D	DYST_00121;	K00963	UGP2,	galU,	galF;	UTP--glucose-1-phosphate	uridylyltransferase	[EC:2.7.7.9]
D	DYST_00302;	K01835	pgm;	phosphoglucomutase	[EC:5.4.2.2]
D	DYST_00762;	K01835	pgm;	phosphoglucomutase	[EC:5.4.2.2]
D	DYST_02974;	K15778	pmm-pgm;	phosphomannomutase	/	phosphoglucomutase	[EC:5.4.2.8	5.4.2.2]
D	DYST_02793;	K00845	glk;	glucokinase	[EC:2.7.1.2]
D	DYST_02843;	K00845	glk;	glucokinase	[EC:2.7.1.2]
D	DYST_02853;	K00845	glk;	glucokinase	[EC:2.7.1.2]
D	DYST_01103;	K12308	bgaB,	lacA;	beta-galactosidase	[EC:3.2.1.23]
D	DYST_00574;	K07407	E3.2.1.22B,	galA,	rafA;	alpha-galactosidase	[EC:3.2.1.22]
D	DYST_01626;	K00917	lacC;	tagatose	6-phosphate	kinase	[EC:2.7.1.144]
D	DYST_02416;	K21071	pfk,	pfp;	ATP-dependent	phosphofructokinase	/	diphosphate-dependent	phosphofructokinase	[EC:2.7.1.11	2.7.1.90]
D	DYST_00358;	K01684	dgoD;	galactonate	dehydratase	[EC:4.2.1.6]
D	DYST_00565;	K01684	dgoD;	galactonate	dehydratase	[EC:4.2.1.6]
D	DYST_03392;	K01684	dgoD;	galactonate	dehydratase	[EC:4.2.1.6]
D	DYST_00567;	K00883	dgoK;	2-dehydro-3-deoxygalactonokinase	[EC:2.7.1.58]
D	DYST_03394;	K00883	dgoK;	2-dehydro-3-deoxygalactonokinase	[EC:2.7.1.58]
D	DYST_00566;	K01631	dgoA;	2-dehydro-3-deoxyphosphogalactonate	aldolase	[EC:4.1.2.21]
D	DYST_03393;	K01631	dgoA;	2-dehydro-3-deoxyphosphogalactonate	aldolase	[EC:4.1.2.21]
D	DYST_02494;	K01187	malZ;	alpha-glucosidase	[EC:3.2.1.20]
D	DYST_02497;	K01187	malZ;	alpha-glucosidase	[EC:3.2.1.20]
D	DYST_01628;	K02082	agaS;	D-galactosamine	6-phosphate	deaminase/isomerase	[EC:3.5.99.-]
C	53	Ascorbate	and	aldarate	metabolism	[PATH:ko00053]
D	DYST_00880;	K00012	UGDH,	ugd;	UDPglucose	6-dehydrogenase	[EC:1.1.1.22]
D	DYST_02127;	K00012	UGDH,	ugd;	UDPglucose	6-dehydrogenase	[EC:1.1.1.22]
D	DYST_01513;	K01195	uidA,	GUSB;	beta-glucuronidase	[EC:3.2.1.31]
D	DYST_00918;	K08679	GAE,	cap1J;	UDP-glucuronate	4-epimerase	[EC:5.1.3.6]
D	DYST_01933;	K08679	GAE,	cap1J;	UDP-glucuronate	4-epimerase	[EC:5.1.3.6]
D	DYST_00669;	K00128	ALDH;	aldehyde	dehydrogenase	(NAD+)	[EC:1.2.1.3]
D	DYST_01095;	K00128	ALDH;	aldehyde	dehydrogenase	(NAD+)	[EC:1.2.1.3]
D	DYST_04799;	K14085	ALDH7A1;	aldehyde	dehydrogenase	family	7	member	A1	[EC:1.2.1.31	1.2.1.8	1.2.1.3]
D	DYST_01603;	K13877	aldH;	2,5-dioxopentanoate	dehydrogenase	[EC:1.2.1.26]
C	500	Starch	and	sucrose	metabolism	[PATH:ko00500]
D	DYST_02494;	K01187	malZ;	alpha-glucosidase	[EC:3.2.1.20]
D	DYST_02497;	K01187	malZ;	alpha-glucosidase	[EC:3.2.1.20]
D	DYST_00121;	K00963	UGP2,	galU,	galF;	UTP--glucose-1-phosphate	uridylyltransferase	[EC:2.7.7.9]
D	DYST_01168;	K01513	ENPP1_3,	CD203;	ectonucleotide	pyrophosphatase/phosphodiesterase	family	member	2021-01-03	[EC:3.1.4.1	3.6.1.9]
D	DYST_03369;	K05349	bglX;	beta-glucosidase	[EC:3.2.1.21]
D	DYST_03401;	K05349	bglX;	beta-glucosidase	[EC:3.2.1.21]
D	DYST_00053;	K00694	bcsA;	cellulose	synthase	(UDP-forming)	[EC:2.4.1.12]
D	DYST_02877;	K01223	E3.2.1.86B,	bglA;	6-phospho-beta-glucosidase	[EC:3.2.1.86]
D	DYST_02495;	K01176	AMY,	amyA,	malS;	alpha-amylase	[EC:3.2.1.1]
D	DYST_01421;	K01214	ISA,	treX;	isoamylase	[EC:3.2.1.68]
D	DYST_03999;	K00697	otsA;	trehalose	6-phosphate	synthase	[EC:2.4.1.15	2.4.1.347]
D	DYST_04001;	K01087	otsB;	trehalose	6-phosphate	phosphatase	[EC:3.1.3.12]
D	DYST_03978;	K01194	TREH,	treA,	treF;	alpha,alpha-trehalase	[EC:3.2.1.28]
D	DYST_04000;	K22934	E3.2.1.28;	alpha,alpha-trehalase	[EC:3.2.1.28]
D	DYST_00302;	K01835	pgm;	phosphoglucomutase	[EC:5.4.2.2]
D	DYST_00762;	K01835	pgm;	phosphoglucomutase	[EC:5.4.2.2]
D	DYST_02974;	K15778	pmm-pgm;	phosphomannomutase	/	phosphoglucomutase	[EC:5.4.2.8	5.4.2.2]
D	DYST_02793;	K00845	glk;	glucokinase	[EC:2.7.1.2]
D	DYST_02843;	K00845	glk;	glucokinase	[EC:2.7.1.2]
D	DYST_02853;	K00845	glk;	glucokinase	[EC:2.7.1.2]
D	DYST_00301;	K01810	GPI,	pgi;	glucose-6-phosphate	isomerase	[EC:5.3.1.9]
D	DYST_04621;	K01810	GPI,	pgi;	glucose-6-phosphate	isomerase	[EC:5.3.1.9]
D	DYST_03969;	K00847	E2.7.1.4,	scrK;	fructokinase	[EC:2.7.1.4]
C	520	Amino	sugar	and	nucleotide	sugar	metabolism	[PATH:ko00520]
D	DYST_00224;	K01183	E3.2.1.14;	chitinase	[EC:3.2.1.14]
D	DYST_01292;	K13381	chiA;	bifunctional	chitinase/lysozyme	[EC:3.2.1.14	3.2.1.17]
D	DYST_00859;	K01207	nagZ;	beta-N-acetylhexosaminidase	[EC:3.2.1.52]
D	DYST_00560;	K12373	HEXA_B;	hexosaminidase	[EC:3.2.1.52]
D	DYST_02840;	K12373	HEXA_B;	hexosaminidase	[EC:3.2.1.52]
D	DYST_02858;	K01443	nagA,	AMDHD2;	N-acetylglucosamine-6-phosphate	deacetylase	[EC:3.5.1.25]
D	DYST_03969;	K00847	E2.7.1.4,	scrK;	fructokinase	[EC:2.7.1.4]
D	DYST_02143;	K00820	glmS,	GFPT;	glutamine---fructose-6-phosphate	transaminase	(isomerizing)	[EC:2.6.1.16]
D	DYST_02857;	K00820	glmS,	GFPT;	glutamine---fructose-6-phosphate	transaminase	(isomerizing)	[EC:2.6.1.16]
D	DYST_00271;	K03431	glmM;	phosphoglucosamine	mutase	[EC:5.4.2.10]
D	DYST_03256;	K04042	glmU;	bifunctional	UDP-N-acetylglucosamine	pyrophosphorylase	/	glucosamine-1-phosphate	N-acetyltransferase	[EC:2.7.7.23	2.3.1.157]
D	DYST_02967;	K09001	anmK;	anhydro-N-acetylmuramic	acid	kinase	[EC:2.7.1.170]
D	DYST_01692;	K22292	mupP;	N-acetyl-D-muramate	6-phosphate	phosphatase	[EC:3.1.3.105]
D	DYST_01847;	K07102	amgK;	N-acetylmuramate	1-kinase	[EC:2.7.1.221]
D	DYST_01848;	K00992	murU;	N-acetyl-alpha-D-muramate	1-phosphate	uridylyltransferase	[EC:2.7.7.99]
D	DYST_04139;	K00790	murA;	UDP-N-acetylglucosamine	1-carboxyvinyltransferase	[EC:2.5.1.7]
D	DYST_04794;	K00075	murB;	UDP-N-acetylmuramate	dehydrogenase	[EC:1.3.1.98]
D	DYST_01988;	K01791	wecB;	UDP-N-acetylglucosamine	2-epimerase	(non-hydrolysing)	[EC:5.1.3.14]
D	DYST_00917;	K22926	tviB,	vipA;	UDP-N-acetylglucosamine	6-dehydrogenase	[EC:1.1.1.136]
D	DYST_00643;	K13017	wbpE,	wlbC;	UDP-2-acetamido-2-deoxy-ribo-hexuluronate	aminotransferase	[EC:2.6.1.98]
D	DYST_02122;	K08678	UXS1,	uxs;	UDP-glucuronate	decarboxylase	[EC:4.1.1.35]
D	DYST_00350;	K01198	xynB;	xylan	1,4-beta-xylosidase	[EC:3.2.1.37]
D	DYST_02793;	K00845	glk;	glucokinase	[EC:2.7.1.2]
D	DYST_02843;	K00845	glk;	glucokinase	[EC:2.7.1.2]
D	DYST_02853;	K00845	glk;	glucokinase	[EC:2.7.1.2]
D	DYST_00302;	K01835	pgm;	phosphoglucomutase	[EC:5.4.2.2]
D	DYST_00762;	K01835	pgm;	phosphoglucomutase	[EC:5.4.2.2]
D	DYST_02974;	K15778	pmm-pgm;	phosphomannomutase	/	phosphoglucomutase	[EC:5.4.2.8	5.4.2.2]
D	DYST_00121;	K00963	UGP2,	galU,	galF;	UTP--glucose-1-phosphate	uridylyltransferase	[EC:2.7.7.9]
D	DYST_00880;	K00012	UGDH,	ugd;	UDPglucose	6-dehydrogenase	[EC:1.1.1.22]
D	DYST_02127;	K00012	UGDH,	ugd;	UDPglucose	6-dehydrogenase	[EC:1.1.1.22]
D	DYST_00945;	K01784	galE,	GALE;	UDP-glucose	4-epimerase	[EC:5.1.3.2]
D	DYST_02218;	K01784	galE,	GALE;	UDP-glucose	4-epimerase	[EC:5.1.3.2]
D	DYST_03208;	K01784	galE,	GALE;	UDP-glucose	4-epimerase	[EC:5.1.3.2]
D	DYST_00918;	K08679	GAE,	cap1J;	UDP-glucuronate	4-epimerase	[EC:5.1.3.6]
D	DYST_01933;	K08679	GAE,	cap1J;	UDP-glucuronate	4-epimerase	[EC:5.1.3.6]
D	DYST_04128;	K02793	manXa;	mannose	PTS	system	EIIA	component	[EC:2.7.1.191]
D	DYST_00301;	K01810	GPI,	pgi;	glucose-6-phosphate	isomerase	[EC:5.3.1.9]
D	DYST_04621;	K01810	GPI,	pgi;	glucose-6-phosphate	isomerase	[EC:5.3.1.9]
D	DYST_02121;	K01840	manB;	phosphomannomutase	[EC:5.4.2.8]
D	DYST_02142;	K16011	algA,	xanB,	rfbA,	wbpW,	pslB;	mannose-1-phosphate	guanylyltransferase	/	mannose-6-phosphate	isomerase	[EC:2.7.7.13	5.3.1.8]
D	DYST_02511;	K00523	ascD,	ddhD,	rfbI;	CDP-4-dehydro-6-deoxyglucose	reductase,	E3	[EC:1.17.1.1]
C	620	Pyruvate	metabolism	[PATH:ko00620]
D	DYST_03077;	K01895	ACSS1_2,	acs;	acetyl-CoA	synthetase	[EC:6.2.1.1]
D	DYST_03608;	K00163	aceE;	pyruvate	dehydrogenase	E1	component	[EC:1.2.4.1]
D	DYST_03634;	K00627	DLAT,	aceF,	pdhC;	pyruvate	dehydrogenase	E2	component	(dihydrolipoamide	acetyltransferase)	[EC:2.3.1.12]
D	DYST_00022;	K00382	DLD,	lpd,	pdhD;	dihydrolipoamide	dehydrogenase	[EC:1.8.1.4]
D	DYST_03635;	K00382	DLD,	lpd,	pdhD;	dihydrolipoamide	dehydrogenase	[EC:1.8.1.4]
D	DYST_04774;	K13953	adhP;	alcohol	dehydrogenase,	propanol-preferring	[EC:1.1.1.1]
D	DYST_01403;	K00121	frmA,	ADH5,	adhC;	S-(hydroxymethyl)glutathione	dehydrogenase	/	alcohol	dehydrogenase	[EC:1.1.1.284	1.1.1.1]
D	DYST_04238;	K12957	ahr;	alcohol/geraniol	dehydrogenase	(NADP+)	[EC:1.1.1.2	1.1.1.183]
D	DYST_00841;	K13979	yahK;	alcohol	dehydrogenase	(NADP+)	[EC:1.1.1.2]
D	DYST_02787;	K22474	adhB;	alcohol	dehydrogenase	(quinone),	cytochrome	c	subunit	[EC:1.1.5.5]
D	DYST_02158;	K00873	PK,	pyk;	pyruvate	kinase	[EC:2.7.1.40]
D	DYST_04471;	K01962	accA;	acetyl-CoA	carboxylase	carboxyl	transferase	subunit	alpha	[EC:6.4.1.2	2.1.3.15]
D	DYST_02476;	K02160	accB,	bccP;	acetyl-CoA	carboxylase	biotin	carboxyl	carrier	protein
D	DYST_02477;	K01961	accC;	acetyl-CoA	carboxylase,	biotin	carboxylase	subunit	[EC:6.4.1.2	6.3.4.14]
D	DYST_01204;	K01963	accD;	acetyl-CoA	carboxylase	carboxyl	transferase	subunit	beta	[EC:6.4.1.2	2.1.3.15]
D	DYST_04384;	K01512	acyP;	acylphosphatase	[EC:3.6.1.7]
D	DYST_00669;	K00128	ALDH;	aldehyde	dehydrogenase	(NAD+)	[EC:1.2.1.3]
D	DYST_01095;	K00128	ALDH;	aldehyde	dehydrogenase	(NAD+)	[EC:1.2.1.3]
D	DYST_04799;	K14085	ALDH7A1;	aldehyde	dehydrogenase	family	7	member	A1	[EC:1.2.1.31	1.2.1.8	1.2.1.3]
D	DYST_01754;	K18118	aarC,	cat1;	succinyl-CoA:acetate	CoA-transferase	[EC:2.8.3.18]
D	DYST_00730;	K00156	poxB;	pyruvate	dehydrogenase	(quinone)	[EC:1.2.5.1]
D	DYST_01420;	K00156	poxB;	pyruvate	dehydrogenase	(quinone)	[EC:1.2.5.1]
D	DYST_01455;	K07248	aldA;	lactaldehyde	dehydrogenase	/	glycolaldehyde	dehydrogenase	[EC:1.2.1.22	1.2.1.21]
D	DYST_01799;	K01759	GLO1,	gloA;	lactoylglutathione	lyase	[EC:4.4.1.5]
D	DYST_02409;	K01759	GLO1,	gloA;	lactoylglutathione	lyase	[EC:4.4.1.5]
D	DYST_00897;	K01069	gloB,	gloC,	HAGH;	hydroxyacylglutathione	hydrolase	[EC:3.1.2.6]
D	DYST_03586;	K00029	E1.1.1.40,	maeB;	malate	dehydrogenase	(oxaloacetate-decarboxylating)(NADP+)	[EC:1.1.1.40]
D	DYST_01340;	K00024	mdh;	malate	dehydrogenase	[EC:1.1.1.37]
D	DYST_04091;	K01676	E4.2.1.2A,	fumA,	fumB;	fumarate	hydratase,	class	I	[EC:4.2.1.2]
D	DYST_00039;	K01679	E4.2.1.2B,	fumC,	FH;	fumarate	hydratase,	class	II	[EC:4.2.1.2]
D	DYST_03844;	K01595	ppc;	phosphoenolpyruvate	carboxylase	[EC:4.1.1.31]
D	DYST_02091;	K01596	E4.1.1.32,	pckA,	PCK;	phosphoenolpyruvate	carboxykinase	(GTP)	[EC:4.1.1.32]
D	DYST_00374;	K01007	pps,	ppsA;	pyruvate,	water	dikinase	[EC:2.7.9.2]
D	DYST_00888;	K01007	pps,	ppsA;	pyruvate,	water	dikinase	[EC:2.7.9.2]
D	DYST_03282;	K01638	aceB,	glcB;	malate	synthase	[EC:2.3.3.9]
D	DYST_01616;	K00626	ACAT,	atoB;	acetyl-CoA	C-acetyltransferase	[EC:2.3.1.9]
D	DYST_02999;	K00626	ACAT,	atoB;	acetyl-CoA	C-acetyltransferase	[EC:2.3.1.9]
D	DYST_02889;	K01649	leuA,	IMS;	2-isopropylmalate	synthase	[EC:2.3.3.13]
C	630	Glyoxylate	and	dicarboxylate	metabolism	[PATH:ko00630]
D	DYST_03281;	K01637	E4.1.3.1,	aceA;	isocitrate	lyase	[EC:4.1.3.1]
D	DYST_03077;	K01895	ACSS1_2,	acs;	acetyl-CoA	synthetase	[EC:6.2.1.1]
D	DYST_03282;	K01638	aceB,	glcB;	malate	synthase	[EC:2.3.3.9]
D	DYST_01340;	K00024	mdh;	malate	dehydrogenase	[EC:1.1.1.37]
D	DYST_01336;	K01647	CS,	gltA;	citrate	synthase	[EC:2.3.3.1]
D	DYST_03785;	K01647	CS,	gltA;	citrate	synthase	[EC:2.3.3.1]
D	DYST_00261;	K01681	ACO,	acnA;	aconitate	hydratase	[EC:4.2.1.3]
D	DYST_00264;	K01682	acnB;	aconitate	hydratase	2	/	2-methylisocitrate	dehydratase	[EC:4.2.1.3	4.2.1.99]
D	DYST_01616;	K00626	ACAT,	atoB;	acetyl-CoA	C-acetyltransferase	[EC:2.3.1.9]
D	DYST_02999;	K00626	ACAT,	atoB;	acetyl-CoA	C-acetyltransferase	[EC:2.3.1.9]
D	DYST_04846;	K00023	phbB;	acetoacetyl-CoA	reductase	[EC:1.1.1.36]
D	DYST_01592;	K01848	E5.4.99.2A,	mcmA1;	methylmalonyl-CoA	mutase,	N-terminal	domain	[EC:5.4.99.2]
D	DYST_03863;	K00104	glcD;	glycolate	oxidase	[EC:1.1.3.15]
D	DYST_03684;	K11473	glcF;	glycolate	oxidase	iron-sulfur	subunit
D	DYST_01140;	K03781	katE,	CAT,	catB,	srpA;	catalase	[EC:1.11.1.6]
D	DYST_01214;	K00015	gyaR,	GOR1;	glyoxylate	reductase	[EC:1.1.1.26]
D	DYST_00531;	K01091	gph;	phosphoglycolate	phosphatase	[EC:3.1.3.18]
D	DYST_02152;	K01091	gph;	phosphoglycolate	phosphatase	[EC:3.1.3.18]
D	DYST_03025;	K01915	glnA,	GLUL;	glutamine	synthetase	[EC:6.3.1.2]
D	DYST_04219;	K00600	glyA,	SHMT;	glycine	hydroxymethyltransferase	[EC:2.1.2.1]
D	DYST_01290;	K00281	GLDC,	gcvP;	glycine	dehydrogenase	[EC:1.4.4.2]
D	DYST_02108;	K00605	gcvT,	AMT;	aminomethyltransferase	[EC:2.1.2.10]
D	DYST_00022;	K00382	DLD,	lpd,	pdhD;	dihydrolipoamide	dehydrogenase	[EC:1.8.1.4]
D	DYST_03635;	K00382	DLD,	lpd,	pdhD;	dihydrolipoamide	dehydrogenase	[EC:1.8.1.4]
D	DYST_02107;	K02437	gcvH,	GCSH;	glycine	cleavage	system	H	protein
D	DYST_01544;	K01816	hyi,	gip;	hydroxypyruvate	isomerase	[EC:5.3.1.22]
D	DYST_04277;	K15918	GLYK;	D-glycerate	3-kinase	[EC:2.7.1.31]
D	DYST_01455;	K07248	aldA;	lactaldehyde	dehydrogenase	/	glycolaldehyde	dehydrogenase	[EC:1.2.1.22	1.2.1.21]
D	DYST_03179;	K01625	eda;	2-dehydro-3-deoxyphosphogluconate	aldolase	/	(4S)-4-hydroxy-2-oxoglutarate	aldolase	[EC:4.1.2.14	4.1.3.42]
D	DYST_01534;	K00123	fdoG,	fdhF,	fdwA;	formate	dehydrogenase	major	subunit	[EC:1.17.1.9]
D	DYST_01533;	K00124	fdoH,	fdsB;	formate	dehydrogenase	iron-sulfur	subunit
D	DYST_01532;	K00127	fdoI,	fdsG;	formate	dehydrogenase	subunit	gamma
D	DYST_01704;	K01433	purU;	formyltetrahydrofolate	deformylase	[EC:3.5.1.10]
D	DYST_01724;	K01458	hutG;	N-formylglutamate	deformylase	[EC:3.5.1.68]
C	640	Propanoate	metabolism	[PATH:ko00640]
D	DYST_03077;	K01895	ACSS1_2,	acs;	acetyl-CoA	synthetase	[EC:6.2.1.1]
D	DYST_01337;	K01908	ACSS3,	prpE;	propionyl-CoA	synthetase	[EC:6.2.1.17]
D	DYST_02175;	K00166	BCKDHA,	bkdA1;	2-oxoisovalerate	dehydrogenase	E1	component	alpha	subunit	[EC:1.2.4.4]
D	DYST_02176;	K00167	BCKDHB,	bkdA2;	2-oxoisovalerate	dehydrogenase	E1	component	beta	subunit	[EC:1.2.4.4]
D	DYST_02177;	K09699	DBT,	bkdB;	2-oxoisovalerate	dehydrogenase	E2	component	(dihydrolipoyl	transacylase)	[EC:2.3.1.168]
D	DYST_00022;	K00382	DLD,	lpd,	pdhD;	dihydrolipoamide	dehydrogenase	[EC:1.8.1.4]
D	DYST_03635;	K00382	DLD,	lpd,	pdhD;	dihydrolipoamide	dehydrogenase	[EC:1.8.1.4]
D	DYST_01476;	K00248	ACADS,	bcd;	butyryl-CoA	dehydrogenase	[EC:1.3.8.1]
D	DYST_00020;	K19745	acuI;	acrylyl-CoA	reductase	(NADPH)	[EC:1.3.1.-]
D	DYST_00877;	K01782	fadJ;	3-hydroxyacyl-CoA	dehydrogenase	/	enoyl-CoA	hydratase	/	3-hydroxybutyryl-CoA	epimerase	[EC:1.1.1.35	4.2.1.17	5.1.2.3]
D	DYST_01086;	K14729	FOX2;	multifunctional	beta-oxidation	protein	[EC:4.2.1.-	1.1.1.-]
D	DYST_04471;	K01962	accA;	acetyl-CoA	carboxylase	carboxyl	transferase	subunit	alpha	[EC:6.4.1.2	2.1.3.15]
D	DYST_02476;	K02160	accB,	bccP;	acetyl-CoA	carboxylase	biotin	carboxyl	carrier	protein
D	DYST_02477;	K01961	accC;	acetyl-CoA	carboxylase,	biotin	carboxylase	subunit	[EC:6.4.1.2	6.3.4.14]
D	DYST_01204;	K01963	accD;	acetyl-CoA	carboxylase	carboxyl	transferase	subunit	beta	[EC:6.4.1.2	2.1.3.15]
D	DYST_01819;	K00823	puuE;	4-aminobutyrate	aminotransferase	[EC:2.6.1.19]
D	DYST_01592;	K01848	E5.4.99.2A,	mcmA1;	methylmalonyl-CoA	mutase,	N-terminal	domain	[EC:5.4.99.2]
D	DYST_03986;	K01903	sucC;	succinyl-CoA	synthetase	beta	subunit	[EC:6.2.1.5]
D	DYST_03987;	K01902	sucD;	succinyl-CoA	synthetase	alpha	subunit	[EC:6.2.1.5]
D	DYST_01334;	K01659	prpC;	2-methylcitrate	synthase	[EC:2.3.3.5]
D	DYST_01324;	K01720	prpD;	2-methylcitrate	dehydratase	[EC:4.2.1.79]
D	DYST_01325;	K20455	acnD;	2-methylcitrate	dehydratase	(2-methyl-trans-aconitate	forming)	[EC:4.2.1.117]
D	DYST_01326;	K09788	prpF;	2-methylaconitate	isomerase	[EC:5.3.3.-]
D	DYST_00264;	K01682	acnB;	aconitate	hydratase	2	/	2-methylisocitrate	dehydratase	[EC:4.2.1.3	4.2.1.99]
D	DYST_01335;	K03417	prpB;	methylisocitrate	lyase	[EC:4.1.3.30]
D	DYST_02543;	K01734	mgsA;	methylglyoxal	synthase	[EC:4.2.3.3]
C	650	Butanoate	metabolism	[PATH:ko00650]
D	DYST_01616;	K00626	ACAT,	atoB;	acetyl-CoA	C-acetyltransferase	[EC:2.3.1.9]
D	DYST_02999;	K00626	ACAT,	atoB;	acetyl-CoA	C-acetyltransferase	[EC:2.3.1.9]
D	DYST_00439;	K07516	fadN;	3-hydroxyacyl-CoA	dehydrogenase	[EC:1.1.1.35]
D	DYST_01088;	K07516	fadN;	3-hydroxyacyl-CoA	dehydrogenase	[EC:1.1.1.35]
D	DYST_00877;	K01782	fadJ;	3-hydroxyacyl-CoA	dehydrogenase	/	enoyl-CoA	hydratase	/	3-hydroxybutyryl-CoA	epimerase	[EC:1.1.1.35	4.2.1.17	5.1.2.3]
D	DYST_04629;	K01715	crt;	enoyl-CoA	hydratase	[EC:4.2.1.17]
D	DYST_01476;	K00248	ACADS,	bcd;	butyryl-CoA	dehydrogenase	[EC:1.3.8.1]
D	DYST_00396;	K00209	fabV,	ter;	enoyl-[acyl-carrier	protein]	reductase	/	trans-2-enoyl-CoA	reductase	(NAD+)	[EC:1.3.1.9	1.3.1.44]
D	DYST_00009;	K03821	phaC,	phbC;	poly[(R)-3-hydroxyalkanoate]	polymerase	subunit	PhaC	[EC:2.3.1.304]
D	DYST_04177;	K05973	phaZ;	poly(3-hydroxybutyrate)	depolymerase	[EC:3.1.1.75]
D	DYST_04846;	K00023	phbB;	acetoacetyl-CoA	reductase	[EC:1.1.1.36]
D	DYST_04861;	K00239	sdhA,	frdA;	succinate	dehydrogenase	/	fumarate	reductase,	flavoprotein	subunit	[EC:1.3.5.1	1.3.5.4]
D	DYST_04862;	K00240	sdhB,	frdB;	succinate	dehydrogenase	/	fumarate	reductase,	iron-sulfur	subunit	[EC:1.3.5.1	1.3.5.4]
D	DYST_04859;	K00241	sdhC,	frdC;	succinate	dehydrogenase	/	fumarate	reductase,	cytochrome	b	subunit
D	DYST_04860;	K00242	sdhD,	frdD;	succinate	dehydrogenase	/	fumarate	reductase,	membrane	anchor	subunit
D	DYST_01819;	K00823	puuE;	4-aminobutyrate	aminotransferase	[EC:2.6.1.19]
D	DYST_01754;	K18118	aarC,	cat1;	succinyl-CoA:acetate	CoA-transferase	[EC:2.8.3.18]
D	DYST_01651;	K01640	HMGCL,	hmgL;	hydroxymethylglutaryl-CoA	lyase	[EC:4.1.3.4]
D	DYST_02012;	K01027	OXCT;	3-oxoacid	CoA-transferase	[EC:2.8.3.5]
D	DYST_02989;	K00019	BDH,	bdhA;	3-hydroxybutyrate	dehydrogenase	[EC:1.1.1.30]
D	DYST_02988;	K01574	adc;	acetoacetate	decarboxylase	[EC:4.1.1.4]
D	DYST_00828;	K01652	E2.2.1.6L,	ilvB,	ilvG,	ilvI;	acetolactate	synthase	I/II/III	large	subunit	[EC:2.2.1.6]
D	DYST_02897;	K01652	E2.2.1.6L,	ilvB,	ilvG,	ilvI;	acetolactate	synthase	I/II/III	large	subunit	[EC:2.2.1.6]
D	DYST_02898;	K01653	E2.2.1.6S,	ilvH,	ilvN;	acetolactate	synthase	I/III	small	subunit	[EC:2.2.1.6]
C	660	C5-Branched	dibasic	acid	metabolism	[PATH:ko00660]
D	DYST_00828;	K01652	E2.2.1.6L,	ilvB,	ilvG,	ilvI;	acetolactate	synthase	I/II/III	large	subunit	[EC:2.2.1.6]
D	DYST_02897;	K01652	E2.2.1.6L,	ilvB,	ilvG,	ilvI;	acetolactate	synthase	I/II/III	large	subunit	[EC:2.2.1.6]
D	DYST_02898;	K01653	E2.2.1.6S,	ilvH,	ilvN;	acetolactate	synthase	I/III	small	subunit	[EC:2.2.1.6]
D	DYST_03986;	K01903	sucC;	succinyl-CoA	synthetase	beta	subunit	[EC:6.2.1.5]
D	DYST_03987;	K01902	sucD;	succinyl-CoA	synthetase	alpha	subunit	[EC:6.2.1.5]
D	DYST_02892;	K01703	leuC,	IPMI-L;	3-isopropylmalate/(R)-2-methylmalate	dehydratase	large	subunit	[EC:4.2.1.33	4.2.1.35]
D	DYST_02893;	K01704	leuD,	IPMI-S;	3-isopropylmalate/(R)-2-methylmalate	dehydratase	small	subunit	[EC:4.2.1.33	4.2.1.35]
D	DYST_02894;	K00052	leuB,	IMDH;	3-isopropylmalate	dehydrogenase	[EC:1.1.1.85]
C	562	Inositol	phosphate	metabolism	[PATH:ko00562]
D	DYST_03042;	K01114	plc;	phospholipase	C	[EC:3.1.4.3]
D	DYST_04146;	K01092	E3.1.3.25,	IMPA,	suhB;	myo-inositol-1(or	4)-monophosphatase	[EC:3.1.3.25]
D	DYST_00274;	K01803	TPI,	tpiA;	triosephosphate	isomerase	(TIM)	[EC:5.3.1.1]
B
B	9102	Energy	metabolism
C	190	Oxidative	phosphorylation	[PATH:ko00190]
D	DYST_04907;	K00330	nuoA;	NADH-quinone	oxidoreductase	subunit	A	[EC:7.1.1.2]
D	DYST_04908;	K00331	nuoB;	NADH-quinone	oxidoreductase	subunit	B	[EC:7.1.1.2]
D	DYST_04909;	K00332	nuoC;	NADH-quinone	oxidoreductase	subunit	C	[EC:7.1.1.2]
D	DYST_04910;	K00333	nuoD;	NADH-quinone	oxidoreductase	subunit	D	[EC:7.1.1.2]
D	DYST_04911;	K00334	nuoE;	NADH-quinone	oxidoreductase	subunit	E	[EC:7.1.1.2]
D	DYST_04912;	K00335	nuoF;	NADH-quinone	oxidoreductase	subunit	F	[EC:7.1.1.2]
D	DYST_04913;	K00336	nuoG;	NADH-quinone	oxidoreductase	subunit	G	[EC:7.1.1.2]
D	DYST_04914;	K00337	nuoH;	NADH-quinone	oxidoreductase	subunit	H	[EC:7.1.1.2]
D	DYST_04915;	K00338	nuoI;	NADH-quinone	oxidoreductase	subunit	I	[EC:7.1.1.2]
D	DYST_04916;	K00339	nuoJ;	NADH-quinone	oxidoreductase	subunit	J	[EC:7.1.1.2]
D	DYST_04917;	K00340	nuoK;	NADH-quinone	oxidoreductase	subunit	K	[EC:7.1.1.2]
D	DYST_04918;	K00341	nuoL;	NADH-quinone	oxidoreductase	subunit	L	[EC:7.1.1.2]
D	DYST_04919;	K00342	nuoM;	NADH-quinone	oxidoreductase	subunit	M	[EC:7.1.1.2]
D	DYST_04920;	K00343	nuoN;	NADH-quinone	oxidoreductase	subunit	N	[EC:7.1.1.2]
D	DYST_03493;	K03953	NDUFA9;	NADH	dehydrogenase	(ubiquinone)	1	alpha	subcomplex	subunit	9
D	DYST_02295;	K03885	ndh;	NADH:ubiquinone	reductase	(H+-translocating)	[EC:7.1.1.2]
D	DYST_04861;	K00239	sdhA,	frdA;	succinate	dehydrogenase	/	fumarate	reductase,	flavoprotein	subunit	[EC:1.3.5.1	1.3.5.4]
D	DYST_04862;	K00240	sdhB,	frdB;	succinate	dehydrogenase	/	fumarate	reductase,	iron-sulfur	subunit	[EC:1.3.5.1	1.3.5.4]
D	DYST_04859;	K00241	sdhC,	frdC;	succinate	dehydrogenase	/	fumarate	reductase,	cytochrome	b	subunit
D	DYST_04860;	K00242	sdhD,	frdD;	succinate	dehydrogenase	/	fumarate	reductase,	membrane	anchor	subunit
D	DYST_01963;	K00411	UQCRFS1,	RIP1,	petA;	ubiquinol-cytochrome	c	reductase	iron-sulfur	subunit	[EC:7.1.1.8]
D	DYST_01962;	K00412	CYTB,	petB;	ubiquinol-cytochrome	c	reductase	cytochrome	b	subunit
D	DYST_01961;	K00413	CYC1,	CYT1,	petC;	ubiquinol-cytochrome	c	reductase	cytochrome	c1	subunit
D	DYST_03468;	K02257	COX10,	ctaB,	cyoE;	heme	o	synthase	[EC:2.5.1.141]
D	DYST_03186;	K02300	cyoD;	cytochrome	o	ubiquinol	oxidase	subunit	IV
D	DYST_03463;	K02276	coxC,	ctaE;	cytochrome	c	oxidase	subunit	III	[EC:7.1.1.9]
D	DYST_03461;	K02274	coxA,	ctaD;	cytochrome	c	oxidase	subunit	I	[EC:7.1.1.9]
D	DYST_03460;	K02275	coxB,	ctaC;	cytochrome	c	oxidase	subunit	II	[EC:7.1.1.9]
D	DYST_03467;	K02259	COX15,	ctaA;	heme	a	synthase	[EC:1.17.99.9]
D	DYST_03830;	K00404	ccoN;	cytochrome	c	oxidase	cbb3-type	subunit	I	[EC:7.1.1.9]
D	DYST_03831;	K00405	ccoO;	cytochrome	c	oxidase	cbb3-type	subunit	II
D	DYST_03833;	K00406	ccoP;	cytochrome	c	oxidase	cbb3-type	subunit	III
D	DYST_01036;	K02299	cyoC;	cytochrome	o	ubiquinol	oxidase	subunit	III
D	DYST_03187;	K02299	cyoC;	cytochrome	o	ubiquinol	oxidase	subunit	III
D	DYST_01037;	K02298	cyoB;	cytochrome	o	ubiquinol	oxidase	subunit	I	[EC:7.1.1.3]
D	DYST_03188;	K02298	cyoB;	cytochrome	o	ubiquinol	oxidase	subunit	I	[EC:7.1.1.3]
D	DYST_01038;	K02297	cyoA;	cytochrome	o	ubiquinol	oxidase	subunit	II	[EC:7.1.1.3]
D	DYST_03189;	K02297	cyoA;	cytochrome	o	ubiquinol	oxidase	subunit	II	[EC:7.1.1.3]
D	DYST_03701;	K00425	cydA;	cytochrome	bd	ubiquinol	oxidase	subunit	I	[EC:7.1.1.7]
D	DYST_03700;	K00426	cydB;	cytochrome	bd	ubiquinol	oxidase	subunit	II	[EC:7.1.1.7]
D	DYST_00637;	K08738	CYC;	cytochrome	c
D	DYST_03251;	K02111	ATPF1A,	atpA;	F-type	H+/Na+-transporting	ATPase	subunit	alpha	[EC:7.1.2.2	7.2.2.1]
D	DYST_03253;	K02112	ATPF1B,	atpD;	F-type	H+/Na+-transporting	ATPase	subunit	beta	[EC:7.1.2.2	7.2.2.1]
D	DYST_03252;	K02115	ATPF1G,	atpG;	F-type	H+-transporting	ATPase	subunit	gamma
D	DYST_03250;	K02113	ATPF1D,	atpH;	F-type	H+-transporting	ATPase	subunit	delta
D	DYST_03254;	K02114	ATPF1E,	atpC;	F-type	H+-transporting	ATPase	subunit	epsilon
D	DYST_03247;	K02108	ATPF0A,	atpB;	F-type	H+-transporting	ATPase	subunit	a
D	DYST_03249;	K02109	ATPF0B,	atpF;	F-type	H+-transporting	ATPase	subunit	b
D	DYST_03248;	K02110	ATPF0C,	atpE;	F-type	H+-transporting	ATPase	subunit	c
D	DYST_02427;	K01507	ppa;	inorganic	pyrophosphatase	[EC:3.6.1.1]
D	DYST_04597;	K00937	ppk1;	polyphosphate	kinase	[EC:2.7.4.1]
D	DYST_04791;	K00937	ppk1;	polyphosphate	kinase	[EC:2.7.4.1]
D	DYST_04387;	K22468	ppk2;	polyphosphate	kinase	[EC:2.7.4.34]
C	195	Photosynthesis	[PATH:ko00195]
D	DYST_03254;	K02114	ATPF1E,	atpC;	F-type	H+-transporting	ATPase	subunit	epsilon
D	DYST_03253;	K02112	ATPF1B,	atpD;	F-type	H+/Na+-transporting	ATPase	subunit	beta	[EC:7.1.2.2	7.2.2.1]
D	DYST_03252;	K02115	ATPF1G,	atpG;	F-type	H+-transporting	ATPase	subunit	gamma
D	DYST_03251;	K02111	ATPF1A,	atpA;	F-type	H+/Na+-transporting	ATPase	subunit	alpha	[EC:7.1.2.2	7.2.2.1]
D	DYST_03250;	K02113	ATPF1D,	atpH;	F-type	H+-transporting	ATPase	subunit	delta
D	DYST_03249;	K02109	ATPF0B,	atpF;	F-type	H+-transporting	ATPase	subunit	b
D	DYST_03248;	K02110	ATPF0C,	atpE;	F-type	H+-transporting	ATPase	subunit	c
D	DYST_03247;	K02108	ATPF0A,	atpB;	F-type	H+-transporting	ATPase	subunit	a
C	196	Photosynthesis	-	antenna	proteins	[PATH:ko00196]
C	710	Carbon	fixation	in	photosynthetic	organisms	[PATH:ko00710]
D	DYST_02151;	K00927	PGK,	pgk;	phosphoglycerate	kinase	[EC:2.7.2.3]
D	DYST_02161;	K00134	GAPDH,	gapA;	glyceraldehyde	3-phosphate	dehydrogenase	(phosphorylating)	[EC:1.2.1.12]
D	DYST_02156;	K01623	ALDO;	fructose-bisphosphate	aldolase,	class	I	[EC:4.1.2.13]
D	DYST_01629;	K11645	fbaB;	fructose-bisphosphate	aldolase,	class	I	[EC:4.1.2.13]
D	DYST_03067;	K03841	FBP,	fbp;	fructose-1,6-bisphosphatase	I	[EC:3.1.3.11]
D	DYST_00303;	K00615	E2.2.1.1,	tktA,	tktB;	transketolase	[EC:2.2.1.1]
D	DYST_02154;	K00615	E2.2.1.1,	tktA,	tktB;	transketolase	[EC:2.2.1.1]
D	DYST_02862;	K00615	E2.2.1.1,	tktA,	tktB;	transketolase	[EC:2.2.1.1]
D	DYST_03691;	K01807	rpiA;	ribose	5-phosphate	isomerase	A	[EC:5.3.1.6]
D	DYST_00274;	K01803	TPI,	tpiA;	triosephosphate	isomerase	(TIM)	[EC:5.3.1.1]
D	DYST_03652;	K01783	rpe,	RPE;	ribulose-phosphate	3-epimerase	[EC:5.1.3.1]
D	DYST_03844;	K01595	ppc;	phosphoenolpyruvate	carboxylase	[EC:4.1.1.31]
D	DYST_03586;	K00029	E1.1.1.40,	maeB;	malate	dehydrogenase	(oxaloacetate-decarboxylating)(NADP+)	[EC:1.1.1.40]
D	DYST_01340;	K00024	mdh;	malate	dehydrogenase	[EC:1.1.1.37]
C	720	Carbon	fixation	pathways	in	prokaryotes	[PATH:ko00720]
D	DYST_00374;	K01007	pps,	ppsA;	pyruvate,	water	dikinase	[EC:2.7.9.2]
D	DYST_00888;	K01007	pps,	ppsA;	pyruvate,	water	dikinase	[EC:2.7.9.2]
D	DYST_03844;	K01595	ppc;	phosphoenolpyruvate	carboxylase	[EC:4.1.1.31]
D	DYST_01340;	K00024	mdh;	malate	dehydrogenase	[EC:1.1.1.37]
D	DYST_04091;	K01676	E4.2.1.2A,	fumA,	fumB;	fumarate	hydratase,	class	I	[EC:4.2.1.2]
D	DYST_00039;	K01679	E4.2.1.2B,	fumC,	FH;	fumarate	hydratase,	class	II	[EC:4.2.1.2]
D	DYST_04861;	K00239	sdhA,	frdA;	succinate	dehydrogenase	/	fumarate	reductase,	flavoprotein	subunit	[EC:1.3.5.1	1.3.5.4]
D	DYST_04862;	K00240	sdhB,	frdB;	succinate	dehydrogenase	/	fumarate	reductase,	iron-sulfur	subunit	[EC:1.3.5.1	1.3.5.4]
D	DYST_04859;	K00241	sdhC,	frdC;	succinate	dehydrogenase	/	fumarate	reductase,	cytochrome	b	subunit
D	DYST_04860;	K00242	sdhD,	frdD;	succinate	dehydrogenase	/	fumarate	reductase,	membrane	anchor	subunit
D	DYST_03987;	K01902	sucD;	succinyl-CoA	synthetase	alpha	subunit	[EC:6.2.1.5]
D	DYST_03986;	K01903	sucC;	succinyl-CoA	synthetase	beta	subunit	[EC:6.2.1.5]
D	DYST_01616;	K00626	ACAT,	atoB;	acetyl-CoA	C-acetyltransferase	[EC:2.3.1.9]
D	DYST_02999;	K00626	ACAT,	atoB;	acetyl-CoA	C-acetyltransferase	[EC:2.3.1.9]
D	DYST_03364;	K00031	IDH1,	IDH2,	icd;	isocitrate	dehydrogenase	[EC:1.1.1.42]
D	DYST_00261;	K01681	ACO,	acnA;	aconitate	hydratase	[EC:4.2.1.3]
D	DYST_00264;	K01682	acnB;	aconitate	hydratase	2	/	2-methylisocitrate	dehydratase	[EC:4.2.1.3	4.2.1.99]
D	DYST_04471;	K01962	accA;	acetyl-CoA	carboxylase	carboxyl	transferase	subunit	alpha	[EC:6.4.1.2	2.1.3.15]
D	DYST_02476;	K02160	accB,	bccP;	acetyl-CoA	carboxylase	biotin	carboxyl	carrier	protein
D	DYST_02477;	K01961	accC;	acetyl-CoA	carboxylase,	biotin	carboxylase	subunit	[EC:6.4.1.2	6.3.4.14]
D	DYST_01204;	K01963	accD;	acetyl-CoA	carboxylase	carboxyl	transferase	subunit	beta	[EC:6.4.1.2	2.1.3.15]
D	DYST_01592;	K01848	E5.4.99.2A,	mcmA1;	methylmalonyl-CoA	mutase,	N-terminal	domain	[EC:5.4.99.2]
D	DYST_00451;	K01491	folD;	methylenetetrahydrofolate	dehydrogenase	(NADP+)	/	methenyltetrahydrofolate	cyclohydrolase	[EC:1.5.1.5	3.5.4.9]
D	DYST_03829;	K00297	metF,	MTHFR;	methylenetetrahydrofolate	reductase	(NADH)	[EC:1.5.1.54]
D	DYST_03077;	K01895	ACSS1_2,	acs;	acetyl-CoA	synthetase	[EC:6.2.1.1]
C	680	Methane	metabolism	[PATH:ko00680]
D	DYST_01403;	K00121	frmA,	ADH5,	adhC;	S-(hydroxymethyl)glutathione	dehydrogenase	/	alcohol	dehydrogenase	[EC:1.1.1.284	1.1.1.1]
D	DYST_01738;	K01070	frmB,	ESD,	fghA;	S-formylglutathione	hydrolase	[EC:3.1.2.12]
D	DYST_01534;	K00123	fdoG,	fdhF,	fdwA;	formate	dehydrogenase	major	subunit	[EC:1.17.1.9]
D	DYST_01533;	K00124	fdoH,	fdsB;	formate	dehydrogenase	iron-sulfur	subunit
D	DYST_01532;	K00127	fdoI,	fdsG;	formate	dehydrogenase	subunit	gamma
D	DYST_04219;	K00600	glyA,	SHMT;	glycine	hydroxymethyltransferase	[EC:2.1.2.1]
D	DYST_01031;	K01689	ENO,	eno;	enolase	[EC:4.2.1.11]
D	DYST_03844;	K01595	ppc;	phosphoenolpyruvate	carboxylase	[EC:4.1.1.31]
D	DYST_01340;	K00024	mdh;	malate	dehydrogenase	[EC:1.1.1.37]
D	DYST_02156;	K01623	ALDO;	fructose-bisphosphate	aldolase,	class	I	[EC:4.1.2.13]
D	DYST_01629;	K11645	fbaB;	fructose-bisphosphate	aldolase,	class	I	[EC:4.1.2.13]
D	DYST_03067;	K03841	FBP,	fbp;	fructose-1,6-bisphosphatase	I	[EC:3.1.3.11]
D	DYST_02416;	K21071	pfk,	pfp;	ATP-dependent	phosphofructokinase	/	diphosphate-dependent	phosphofructokinase	[EC:2.7.1.11	2.7.1.90]
D	DYST_03077;	K01895	ACSS1_2,	acs;	acetyl-CoA	synthetase	[EC:6.2.1.1]
D	DYST_00374;	K01007	pps,	ppsA;	pyruvate,	water	dikinase	[EC:2.7.9.2]
D	DYST_00888;	K01007	pps,	ppsA;	pyruvate,	water	dikinase	[EC:2.7.9.2]
D	DYST_03275;	K01834	PGAM,	gpmA;	2,3-bisphosphoglycerate-dependent	phosphoglycerate	mutase	[EC:5.4.2.11]
D	DYST_01923;	K00058	serA,	PHGDH;	D-3-phosphoglycerate	dehydrogenase	/	2-oxoglutarate	reductase	[EC:1.1.1.95	1.1.1.399]
D	DYST_00420;	K00831	serC,	PSAT1;	phosphoserine	aminotransferase	[EC:2.6.1.52]
C	910	Nitrogen	metabolism	[PATH:ko00910]
D	DYST_01286;	K02567	napA;	nitrate	reductase	(cytochrome)	[EC:1.9.6.1]
D	DYST_01410;	K00459	ncd2,	npd;	nitronate	monooxygenase	[EC:1.13.12.16]
D	DYST_01469;	K15371	GDH2;	glutamate	dehydrogenase	[EC:1.4.1.2]
D	DYST_03025;	K01915	glnA,	GLUL;	glutamine	synthetase	[EC:6.3.1.2]
D	DYST_02547;	K00265	gltB;	glutamate	synthase	(NADPH)	large	chain	[EC:1.4.1.13]
D	DYST_02546;	K00266	gltD;	glutamate	synthase	(NADPH)	small	chain	[EC:1.4.1.13]
D	DYST_00743;	K01725	cynS;	cyanate	lyase	[EC:4.2.1.104]
D	DYST_00744;	K01673	cynT,	can;	carbonic	anhydrase	[EC:4.2.1.1]
D	DYST_01251;	K01673	cynT,	can;	carbonic	anhydrase	[EC:4.2.1.1]
D	DYST_01313;	K01673	cynT,	can;	carbonic	anhydrase	[EC:4.2.1.1]
D	DYST_01721;	K01673	cynT,	can;	carbonic	anhydrase	[EC:4.2.1.1]
C	920	Sulfur	metabolism	[PATH:ko00920]
D	DYST_01057;	K23163	sbp;	sulfate/thiosulfate	transport	system	substrate-binding	protein
D	DYST_01056;	K02046	cysU;	sulfate/thiosulfate	transport	system	permease	protein
D	DYST_01055;	K02047	cysW;	sulfate/thiosulfate	transport	system	permease	protein
D	DYST_01054;	K02045	cysA;	sulfate/thiosulfate	transport	system	ATP-binding	protein	[EC:7.3.2.3]
D	DYST_02109;	K00955	cysNC;	bifunctional	enzyme	CysN/CysC	[EC:2.7.7.4	2.7.1.25]
D	DYST_02110;	K00957	cysD;	sulfate	adenylyltransferase	subunit	2	[EC:2.7.7.4]
D	DYST_00031;	K00958	sat,	met3;	sulfate	adenylyltransferase	[EC:2.7.7.4]
D	DYST_02022;	K01082	cysQ,	MET22,	BPNT1;	3'(2'),	5'-bisphosphate	nucleotidase	[EC:3.1.3.7]
D	DYST_00030;	K00390	cysH;	phosphoadenosine	phosphosulfate	reductase	[EC:1.8.4.8	1.8.4.10]
D	DYST_02345;	K00387	SUOX;	sulfite	oxidase	[EC:1.8.3.1]
D	DYST_00028;	K00380	cysJ;	sulfite	reductase	(NADPH)	flavoprotein	alpha-component	[EC:1.8.1.2]
D	DYST_01808;	K00380	cysJ;	sulfite	reductase	(NADPH)	flavoprotein	alpha-component	[EC:1.8.1.2]
D	DYST_00029;	K00381	cysI;	sulfite	reductase	(NADPH)	hemoprotein	beta-component	[EC:1.8.1.2]
D	DYST_04632;	K01011	TST,	MPST,	sseA;	thiosulfate/3-mercaptopyruvate	sulfurtransferase	[EC:2.8.1.1	2.8.1.2]
D	DYST_00034;	K01738	cysK;	cysteine	synthase	[EC:2.5.1.47]
D	DYST_01044;	K01738	cysK;	cysteine	synthase	[EC:2.5.1.47]
D	DYST_04834;	K00641	metX;	homoserine	O-acetyltransferase/O-succinyltransferase	[EC:2.3.1.31	2.3.1.46]
D	DYST_02074;	K01739	metB;	cystathionine	gamma-synthase	[EC:2.5.1.48]
B
B	9103	Lipid	metabolism
C	61	Fatty	acid	biosynthesis	[PATH:ko00061]
D	DYST_04471;	K01962	accA;	acetyl-CoA	carboxylase	carboxyl	transferase	subunit	alpha	[EC:6.4.1.2	2.1.3.15]
D	DYST_02476;	K02160	accB,	bccP;	acetyl-CoA	carboxylase	biotin	carboxyl	carrier	protein
D	DYST_02477;	K01961	accC;	acetyl-CoA	carboxylase,	biotin	carboxylase	subunit	[EC:6.4.1.2	6.3.4.14]
D	DYST_01204;	K01963	accD;	acetyl-CoA	carboxylase	carboxyl	transferase	subunit	beta	[EC:6.4.1.2	2.1.3.15]
D	DYST_03259;	K02078	acpP;	acyl	carrier	protein
D	DYST_04897;	K02078	acpP;	acyl	carrier	protein
D	DYST_04895;	K00645	fabD,	MCAT,	MCT1;	[acyl-carrier-protein]	S-malonyltransferase	[EC:2.3.1.39]
D	DYST_04894;	K00648	fabH;	3-oxoacyl-[acyl-carrier-protein]	synthase	III	[EC:2.3.1.180]
D	DYST_04898;	K09458	fabF,	OXSM,	CEM1;	3-oxoacyl-[acyl-carrier-protein]	synthase	II	[EC:2.3.1.179]
D	DYST_01719;	K00059	fabG,	OAR1;	3-oxoacyl-[acyl-carrier	protein]	reductase	[EC:1.1.1.100]
D	DYST_02978;	K00059	fabG,	OAR1;	3-oxoacyl-[acyl-carrier	protein]	reductase	[EC:1.1.1.100]
D	DYST_03267;	K00059	fabG,	OAR1;	3-oxoacyl-[acyl-carrier	protein]	reductase	[EC:1.1.1.100]
D	DYST_04121;	K00059	fabG,	OAR1;	3-oxoacyl-[acyl-carrier	protein]	reductase	[EC:1.1.1.100]
D	DYST_04572;	K00059	fabG,	OAR1;	3-oxoacyl-[acyl-carrier	protein]	reductase	[EC:1.1.1.100]
D	DYST_04896;	K00059	fabG,	OAR1;	3-oxoacyl-[acyl-carrier	protein]	reductase	[EC:1.1.1.100]
D	DYST_04479;	K02372	fabZ;	3-hydroxyacyl-[acyl-carrier-protein]	dehydratase	[EC:4.2.1.59]
D	DYST_00396;	K00209	fabV,	ter;	enoyl-[acyl-carrier	protein]	reductase	/	trans-2-enoyl-CoA	reductase	(NAD+)	[EC:1.3.1.9	1.3.1.44]
D	DYST_00259;	K01897	ACSL,	fadD;	long-chain	acyl-CoA	synthetase	[EC:6.2.1.3]
D	DYST_01081;	K01897	ACSL,	fadD;	long-chain	acyl-CoA	synthetase	[EC:6.2.1.3]
C	62	Fatty	acid	elongation	[PATH:ko00062]
C	71	Fatty	acid	degradation	[PATH:ko00071]
D	DYST_01616;	K00626	ACAT,	atoB;	acetyl-CoA	C-acetyltransferase	[EC:2.3.1.9]
D	DYST_02999;	K00626	ACAT,	atoB;	acetyl-CoA	C-acetyltransferase	[EC:2.3.1.9]
D	DYST_00438;	K00632	fadA,	fadI;	acetyl-CoA	acyltransferase	[EC:2.3.1.16]
D	DYST_01089;	K00632	fadA,	fadI;	acetyl-CoA	acyltransferase	[EC:2.3.1.16]
D	DYST_00877;	K01782	fadJ;	3-hydroxyacyl-CoA	dehydrogenase	/	enoyl-CoA	hydratase	/	3-hydroxybutyryl-CoA	epimerase	[EC:1.1.1.35	4.2.1.17	5.1.2.3]
D	DYST_00439;	K07516	fadN;	3-hydroxyacyl-CoA	dehydrogenase	[EC:1.1.1.35]
D	DYST_01088;	K07516	fadN;	3-hydroxyacyl-CoA	dehydrogenase	[EC:1.1.1.35]
D	DYST_01476;	K00248	ACADS,	bcd;	butyryl-CoA	dehydrogenase	[EC:1.3.8.1]
D	DYST_04056;	K00249	ACADM,	acd;	acyl-CoA	dehydrogenase	[EC:1.3.8.7]
D	DYST_04373;	K00249	ACADM,	acd;	acyl-CoA	dehydrogenase	[EC:1.3.8.7]
D	DYST_02088;	K06445	fadE;	acyl-CoA	dehydrogenase	[EC:1.3.99.-]
D	DYST_01451;	K00252	GCDH,	gcdH;	glutaryl-CoA	dehydrogenase	[EC:1.3.8.6]
D	DYST_00259;	K01897	ACSL,	fadD;	long-chain	acyl-CoA	synthetase	[EC:6.2.1.3]
D	DYST_01081;	K01897	ACSL,	fadD;	long-chain	acyl-CoA	synthetase	[EC:6.2.1.3]
D	DYST_04633;	K13238	ECI1,	DCI;	Delta3-Delta2-enoyl-CoA	isomerase	[EC:5.3.3.8]
D	DYST_01403;	K00121	frmA,	ADH5,	adhC;	S-(hydroxymethyl)glutathione	dehydrogenase	/	alcohol	dehydrogenase	[EC:1.1.1.284	1.1.1.1]
D	DYST_04774;	K13953	adhP;	alcohol	dehydrogenase,	propanol-preferring	[EC:1.1.1.1]
D	DYST_00669;	K00128	ALDH;	aldehyde	dehydrogenase	(NAD+)	[EC:1.2.1.3]
D	DYST_01095;	K00128	ALDH;	aldehyde	dehydrogenase	(NAD+)	[EC:1.2.1.3]
D	DYST_04799;	K14085	ALDH7A1;	aldehyde	dehydrogenase	family	7	member	A1	[EC:1.2.1.31	1.2.1.8	1.2.1.3]
C	73	Cutin,	suberine	and	wax	biosynthesis	[PATH:ko00073]
C	100	Steroid	biosynthesis	[PATH:ko00100]
D	DYST_00504;	K00801	FDFT1;	farnesyl-diphosphate	farnesyltransferase	[EC:2.5.1.21]
D	DYST_00935;	K23558	3BETAHSDD;	plant	3beta-hydroxysteroid-4alpha-carboxylate	3-dehydrogenase	[EC:1.1.1.418]
C	120	Primary	bile	acid	biosynthesis	[PATH:ko00120]
D	DYST_01094;	K01796	E5.1.99.4,	AMACR,	mcr;	alpha-methylacyl-CoA	racemase	[EC:5.1.99.4]
D	DYST_01083;	K08764	SCP2,	SCPX;	sterol	carrier	protein	2	[EC:2.3.1.176]
C	121	Secondary	bile	acid	biosynthesis	[PATH:ko00121]
C	140	Steroid	hormone	biosynthesis	[PATH:ko00140]
D	DYST_04052;	K00038	E1.1.1.53;	3alpha(or	20beta)-hydroxysteroid	dehydrogenase	[EC:1.1.1.53]
D	DYST_03159;	K17690	CYP3A5;	cytochrome	P450	family	3	subfamily	A5	[EC:1.14.14.1]
C	561	Glycerolipid	metabolism	[PATH:ko00561]
D	DYST_04277;	K15918	GLYK;	D-glycerate	3-kinase	[EC:2.7.1.31]
D	DYST_00669;	K00128	ALDH;	aldehyde	dehydrogenase	(NAD+)	[EC:1.2.1.3]
D	DYST_01095;	K00128	ALDH;	aldehyde	dehydrogenase	(NAD+)	[EC:1.2.1.3]
D	DYST_04799;	K14085	ALDH7A1;	aldehyde	dehydrogenase	family	7	member	A1	[EC:1.2.1.31	1.2.1.8	1.2.1.3]
D	DYST_00841;	K13979	yahK;	alcohol	dehydrogenase	(NADP+)	[EC:1.1.1.2]
D	DYST_02394;	K00864	glpK,	GK;	glycerol	kinase	[EC:2.7.1.30]
D	DYST_02820;	K00631	plsB;	glycerol-3-phosphate	O-acyltransferase	[EC:2.3.1.15]
D	DYST_02007;	K00901	dgkA,	DGK;	diacylglycerol	kinase	(ATP)	[EC:2.7.1.107]
D	DYST_00265;	K01046	lip,	TGL2;	triacylglycerol	lipase	[EC:3.1.1.3]
D	DYST_04728;	K23737	NPC3;	2-lysophosphatidate	phosphatase	[EC:3.1.3.106]
D	DYST_02780;	K01054	MGLL;	acylglycerol	lipase	[EC:3.1.1.23]
D	DYST_00525;	K03429	ugtP;	processive	1,2-diacylglycerol	beta-glucosyltransferase	[EC:2.4.1.315]
D	DYST_00574;	K07407	E3.2.1.22B,	galA,	rafA;	alpha-galactosidase	[EC:3.2.1.22]
C	564	Glycerophospholipid	metabolism	[PATH:ko00564]
D	DYST_02798;	K00057	gpsA;	glycerol-3-phosphate	dehydrogenase	(NAD(P)+)	[EC:1.1.1.94]
D	DYST_02820;	K00631	plsB;	glycerol-3-phosphate	O-acyltransferase	[EC:2.3.1.15]
D	DYST_02007;	K00901	dgkA,	DGK;	diacylglycerol	kinase	(ATP)	[EC:2.7.1.107]
D	DYST_03042;	K01114	plc;	phospholipase	C	[EC:3.1.4.3]
D	DYST_04559;	K01058	pldA;	phospholipase	A1/A2	[EC:3.1.1.32	3.1.1.4]
D	DYST_03124;	K14676	NTE,	NRE;	lysophospholipid	hydrolase	[EC:3.1.1.5]
D	DYST_02724;	K01126	E3.1.4.46,	glpQ,	ugpQ;	glycerophosphoryl	diester	phosphodiesterase	[EC:3.1.4.46]
D	DYST_01101;	K14286	AGXT2L1,	ETNPPL;	ethanolamine-phosphate	phospho-lyase	[EC:4.2.3.2]
D	DYST_04484;	K00981	E2.7.7.41,	CDS1,	CDS2,	cdsA;	phosphatidate	cytidylyltransferase	[EC:2.7.7.41]
D	DYST_03301;	K00998	pssA;	CDP-diacylglycerol---serine	O-phosphatidyltransferase	[EC:2.7.8.8]
D	DYST_04266;	K17103	CHO1,	pssA;	CDP-diacylglycerol---serine	O-phosphatidyltransferase	[EC:2.7.8.8]
D	DYST_01218;	K01613	psd,	PISD;	phosphatidylserine	decarboxylase	[EC:4.1.1.65]
D	DYST_00428;	K00995	pgsA,	PGS1;	CDP-diacylglycerol---glycerol-3-phosphate	3-phosphatidyltransferase	[EC:2.7.8.5]
D	DYST_04234;	K01095	pgpA;	phosphatidylglycerophosphatase	A	[EC:3.1.3.27]
D	DYST_00839;	K18697	pgpC;	phosphatidylglycerophosphatase	C	[EC:3.1.3.27]
D	DYST_02265;	K06131	clsA_B;	cardiolipin	synthase	A/B	[EC:2.7.8.-]
D	DYST_00389;	K06132	clsC;	cardiolipin	synthase	C	[EC:2.7.8.-]
C	565	Ether	lipid	metabolism	[PATH:ko00565]
D	DYST_04559;	K01058	pldA;	phospholipase	A1/A2	[EC:3.1.1.32	3.1.1.4]
D	DYST_03042;	K01114	plc;	phospholipase	C	[EC:3.1.4.3]
C	600	Sphingolipid	metabolism	[PATH:ko00600]
D	DYST_00510;	K00720	UGCG;	ceramide	glucosyltransferase	[EC:2.4.1.80]
D	DYST_02658;	K01201	GBA,	srfJ;	glucosylceramidase	[EC:3.2.1.45]
D	DYST_00574;	K07407	E3.2.1.22B,	galA,	rafA;	alpha-galactosidase	[EC:3.2.1.22]
C	590	Arachidonic	acid	metabolism	[PATH:ko00590]
D	DYST_04559;	K01058	pldA;	phospholipase	A1/A2	[EC:3.1.1.32	3.1.1.4]
D	DYST_03314;	K01254	LTA4H;	leukotriene-A4	hydrolase	[EC:3.3.2.6]
D	DYST_04555;	K00432	gpx,	btuE,	bsaA;	glutathione	peroxidase	[EC:1.11.1.9]
D	DYST_03432;	K08726	EPHX2;	soluble	epoxide	hydrolase	/	lipid-phosphate	phosphatase	[EC:3.3.2.10	3.1.3.76]
C	591	Linoleic	acid	metabolism	[PATH:ko00591]
D	DYST_04559;	K01058	pldA;	phospholipase	A1/A2	[EC:3.1.1.32	3.1.1.4]
D	DYST_02080;	K00508	E1.14.19.3;	linoleoyl-CoA	desaturase	[EC:1.14.19.3]
C	592	alpha-Linolenic	acid	metabolism	[PATH:ko00592]
D	DYST_04559;	K01058	pldA;	phospholipase	A1/A2	[EC:3.1.1.32	3.1.1.4]
D	DYST_00438;	K00632	fadA,	fadI;	acetyl-CoA	acyltransferase	[EC:2.3.1.16]
D	DYST_01089;	K00632	fadA,	fadI;	acetyl-CoA	acyltransferase	[EC:2.3.1.16]
C	1040	Biosynthesis	of	unsaturated	fatty	acids	[PATH:ko01040]
D	DYST_02804;	K00507	SCD,	desC;	stearoyl-CoA	desaturase	(Delta-9	desaturase)	[EC:1.14.19.1]
D	DYST_01083;	K08764	SCP2,	SCPX;	sterol	carrier	protein	2	[EC:2.3.1.176]
D	DYST_02015;	K10804	tesA;	acyl-CoA	thioesterase	I	[EC:3.1.2.-	3.1.2.2	3.1.1.2	3.1.1.5]
D	DYST_02752;	K10804	tesA;	acyl-CoA	thioesterase	I	[EC:3.1.2.-	3.1.2.2	3.1.1.2	3.1.1.5]
D	DYST_04777;	K10805	tesB;	acyl-CoA	thioesterase	II	[EC:3.1.2.-]
B
B	9104	Nucleotide	metabolism
C	230	Purine	metabolism	[PATH:ko00230]
D	DYST_04351;	K01515	nudF;	ADP-ribose	pyrophosphatase	[EC:3.6.1.13	3.6.1.-]
D	DYST_02023;	K08312	nudE;	ADP-ribose	diphosphatase	[EC:3.6.1.-]
D	DYST_00302;	K01835	pgm;	phosphoglucomutase	[EC:5.4.2.2]
D	DYST_00762;	K01835	pgm;	phosphoglucomutase	[EC:5.4.2.2]
D	DYST_02974;	K15778	pmm-pgm;	phosphomannomutase	/	phosphoglucomutase	[EC:5.4.2.8	5.4.2.2]
D	DYST_04396;	K00948	PRPS,	prsA;	ribose-phosphate	pyrophosphokinase	[EC:2.7.6.1]
D	DYST_01105;	K00764	purF,	PPAT;	amidophosphoribosyltransferase	[EC:2.4.2.14]
D	DYST_03222;	K01945	purD;	phosphoribosylamine---glycine	ligase	[EC:6.3.4.13]
D	DYST_04141;	K11175	purN;	phosphoribosylglycinamide	formyltransferase	1	[EC:2.1.2.2]
D	DYST_04771;	K08289	purT;	phosphoribosylglycinamide	formyltransferase	2	[EC:6.3.1.21]
D	DYST_04182;	K01952	PFAS,	purL;	phosphoribosylformylglycinamidine	synthase	[EC:6.3.5.3]
D	DYST_04142;	K01933	purM;	phosphoribosylformylglycinamidine	cyclo-ligase	[EC:6.3.3.1]
D	DYST_01952;	K01589	purK;	5-(carboxyamino)imidazole	ribonucleotide	synthase	[EC:6.3.4.18]
D	DYST_01953;	K01588	purE;	5-(carboxyamino)imidazole	ribonucleotide	mutase	[EC:5.4.99.18]
D	DYST_03649;	K01923	purC;	phosphoribosylaminoimidazole-succinocarboxamide	synthase	[EC:6.3.2.6]
D	DYST_00038;	K01756	purB,	ADSL;	adenylosuccinate	lyase	[EC:4.3.2.2]
D	DYST_02483;	K00602	purH;	phosphoribosylaminoimidazolecarboxamide	formyltransferase	/	IMP	cyclohydrolase	[EC:2.1.2.3	3.5.4.10]
D	DYST_04045;	K00759	APRT,	apt;	adenine	phosphoribosyltransferase	[EC:2.4.2.7]
D	DYST_01467;	K01081	E3.1.3.5;	5'-nucleotidase	[EC:3.1.3.5]
D	DYST_01025;	K03787	surE;	5'-nucleotidase	[EC:3.1.3.5]
D	DYST_03783;	K01239	iunH;	purine	nucleosidase	[EC:3.2.2.1]
D	DYST_00858;	K00760	hprT,	hpt,	HPRT1;	hypoxanthine	phosphoribosyltransferase	[EC:2.4.2.8]
D	DYST_00452;	K00088	IMPDH,	guaB;	IMP	dehydrogenase	[EC:1.1.1.205]
D	DYST_00441;	K00940	ndk,	NME;	nucleoside-diphosphate	kinase	[EC:2.7.4.6]
D	DYST_03767;	K02428	rdgB;	XTP/dITP	diphosphohydrolase	[EC:3.6.1.66]
D	DYST_00453;	K01951	guaA,	GMPS;	GMP	synthase	(glutamine-hydrolysing)	[EC:6.3.5.2]
D	DYST_02956;	K01951	guaA,	GMPS;	GMP	synthase	(glutamine-hydrolysing)	[EC:6.3.5.2]
D	DYST_00742;	K01487	guaD,	GDA;	guanine	deaminase	[EC:3.5.4.3]
D	DYST_03770;	K00942	gmk,	GUK1;	guanylate	kinase	[EC:2.7.4.8]
D	DYST_02371;	K00525	E1.17.4.1A,	nrdA,	nrdE;	ribonucleoside-diphosphate	reductase	alpha	chain	[EC:1.17.4.1]
D	DYST_02596;	K00525	E1.17.4.1A,	nrdA,	nrdE;	ribonucleoside-diphosphate	reductase	alpha	chain	[EC:1.17.4.1]
D	DYST_02598;	K00526	E1.17.4.1B,	nrdB,	nrdF;	ribonucleoside-diphosphate	reductase	beta	chain	[EC:1.17.4.1]
D	DYST_03780;	K01139	spoT;	GTP	diphosphokinase	/	guanosine-3',5'-bis(diphosphate)	3'-diphosphatase	[EC:2.7.6.5	3.1.7.2]
D	DYST_04596;	K01524	ppx-gppA;	exopolyphosphatase	/	guanosine-5'-triphosphate,3'-diphosphate	pyrophosphatase	[EC:3.6.1.11	3.6.1.40]
D	DYST_04107;	K00951	relA;	GTP	pyrophosphokinase	[EC:2.7.6.5]
D	DYST_01306;	K01939	purA,	ADSS;	adenylosuccinate	synthase	[EC:6.3.4.4]
D	DYST_02392;	K00856	ADK,	adoK;	adenosine	kinase	[EC:2.7.1.20]
D	DYST_02283;	K01241	amn;	AMP	nucleosidase	[EC:3.2.2.4]
D	DYST_01943;	K06966	ppnN;	pyrimidine/purine-5'-nucleotide	nucleosidase	[EC:3.2.2.10	3.2.2.-]
D	DYST_02860;	K01119	cpdB;	2',3'-cyclic-nucleotide	2'-phosphodiesterase	/	3'-nucleotidase	[EC:3.1.4.16	3.1.3.6]
D	DYST_02414;	K00939	adk,	AK;	adenylate	kinase	[EC:2.7.4.3]
D	DYST_03905;	K01525	apaH;	bis(5'-nucleosyl)-tetraphosphatase	(symmetrical)	[EC:3.6.1.41]
D	DYST_02109;	K00955	cysNC;	bifunctional	enzyme	CysN/CysC	[EC:2.7.7.4	2.7.1.25]
D	DYST_01168;	K01513	ENPP1_3,	CD203;	ectonucleotide	pyrophosphatase/phosphodiesterase	family	member	2021-01-03	[EC:3.1.4.1	3.6.1.9]
D	DYST_02021;	K04765	mazG;	nucleoside	triphosphate	diphosphatase	[EC:3.6.1.9]
D	DYST_02110;	K00957	cysD;	sulfate	adenylyltransferase	subunit	2	[EC:2.7.7.4]
D	DYST_00031;	K00958	sat,	met3;	sulfate	adenylyltransferase	[EC:2.7.7.4]
C	240	Pyrimidine	metabolism	[PATH:ko00240]
D	DYST_00109;	K01955	carB,	CPA2;	carbamoyl-phosphate	synthase	large	subunit	[EC:6.3.5.5]
D	DYST_00108;	K01956	carA,	CPA1;	carbamoyl-phosphate	synthase	small	subunit	[EC:6.3.5.5]
D	DYST_02042;	K00609	pyrB,	PYR2;	aspartate	carbamoyltransferase	catalytic	subunit	[EC:2.1.3.2]
D	DYST_01687;	K01465	URA4,	pyrC;	dihydroorotase	[EC:3.5.2.3]
D	DYST_04795;	K00254	DHODH,	pyrD;	dihydroorotate	dehydrogenase	[EC:1.3.5.2]
D	DYST_02972;	K00762	pyrE;	orotate	phosphoribosyltransferase	[EC:2.4.2.10]
D	DYST_04213;	K01591	pyrF;	orotidine-5'-phosphate	decarboxylase	[EC:4.1.1.23]
D	DYST_04487;	K09903	pyrH;	uridylate	kinase	[EC:2.7.4.22]
D	DYST_00441;	K00940	ndk,	NME;	nucleoside-diphosphate	kinase	[EC:2.7.4.6]
D	DYST_01168;	K01513	ENPP1_3,	CD203;	ectonucleotide	pyrophosphatase/phosphodiesterase	family	member	2021-01-03	[EC:3.1.4.1	3.6.1.9]
D	DYST_02021;	K04765	mazG;	nucleoside	triphosphate	diphosphatase	[EC:3.6.1.9]
D	DYST_01753;	K06287	yhdE;	nucleoside	triphosphate	pyrophosphatase	[EC:3.6.1.-]
D	DYST_02273;	K07043	upp;	UTP	pyrophosphatase	[EC:3.6.1.-]
D	DYST_01034;	K01937	pyrG,	CTPS;	CTP	synthase	[EC:6.3.4.2]
D	DYST_01231;	K01494	dcd;	dCTP	deaminase	[EC:3.5.4.13]
D	DYST_00114;	K00945	cmk;	CMP/dCMP	kinase	[EC:2.7.4.25]
D	DYST_01467;	K01081	E3.1.3.5;	5'-nucleotidase	[EC:3.1.3.5]
D	DYST_01025;	K03787	surE;	5'-nucleotidase	[EC:3.1.3.5]
D	DYST_01917;	K00761	upp,	UPRT;	uracil	phosphoribosyltransferase	[EC:2.4.2.9]
D	DYST_02860;	K01119	cpdB;	2',3'-cyclic-nucleotide	2'-phosphodiesterase	/	3'-nucleotidase	[EC:3.1.4.16	3.1.3.6]
D	DYST_01739;	K16066	ydfG;	3-hydroxy	acid	dehydrogenase	/	malonic	semialdehyde	reductase	[EC:1.1.1.381	1.1.1.-]
D	DYST_02445;	K09019	rutE;	3-hydroxypropanoate	dehydrogenase	[EC:1.1.1.-]
D	DYST_01943;	K06966	ppnN;	pyrimidine/purine-5'-nucleotide	nucleosidase	[EC:3.2.2.10	3.2.2.-]
D	DYST_04356;	K01489	cdd,	CDA;	cytidine	deaminase	[EC:3.5.4.5]
D	DYST_02371;	K00525	E1.17.4.1A,	nrdA,	nrdE;	ribonucleoside-diphosphate	reductase	alpha	chain	[EC:1.17.4.1]
D	DYST_02596;	K00525	E1.17.4.1A,	nrdA,	nrdE;	ribonucleoside-diphosphate	reductase	alpha	chain	[EC:1.17.4.1]
D	DYST_02598;	K00526	E1.17.4.1B,	nrdB,	nrdF;	ribonucleoside-diphosphate	reductase	beta	chain	[EC:1.17.4.1]
D	DYST_04902;	K00943	tmk,	DTYMK;	dTMP	kinase	[EC:2.7.4.9]
D	DYST_02975;	K01520	dut,	DUT;	dUTP	pyrophosphatase	[EC:3.6.1.23]
D	DYST_02812;	K00857	tdk,	TK;	thymidine	kinase	[EC:2.7.1.21]
D	DYST_01998;	K00560	thyA,	TYMS;	thymidylate	synthase	[EC:2.1.1.45]
B
B	9105	Amino	acid	metabolism
C	250	Alanine,	aspartate	and	glutamate	metabolism	[PATH:ko00250]
D	DYST_01341;	K00812	aspB;	aspartate	aminotransferase	[EC:2.6.1.1]
D	DYST_02011;	K13051	ASRGL1,	iaaA;	L-asparaginase	/	beta-aspartyl-peptidase	[EC:3.5.1.1	3.4.19.5]
D	DYST_00373;	K01953	asnB,	ASNS;	asparagine	synthase	(glutamine-hydrolysing)	[EC:6.3.5.4]
D	DYST_00249;	K13566	NIT2,	yafV;	omega-amidase	[EC:3.5.1.3]
D	DYST_03582;	K14260	alaA;	alanine-synthesizing	transaminase	[EC:2.6.1.66	2.6.1.2]
D	DYST_00812;	K00259	ald;	alanine	dehydrogenase	[EC:1.4.1.1]
D	DYST_01679;	K01940	argG,	ASS1;	argininosuccinate	synthase	[EC:6.3.4.5]
D	DYST_01674;	K01755	argH,	ASL;	argininosuccinate	lyase	[EC:4.3.2.1]
D	DYST_01306;	K01939	purA,	ADSS;	adenylosuccinate	synthase	[EC:6.3.4.4]
D	DYST_00038;	K01756	purB,	ADSL;	adenylosuccinate	lyase	[EC:4.3.2.2]
D	DYST_02042;	K00609	pyrB,	PYR2;	aspartate	carbamoyltransferase	catalytic	subunit	[EC:2.1.3.2]
D	DYST_01819;	K00823	puuE;	4-aminobutyrate	aminotransferase	[EC:2.6.1.19]
D	DYST_02547;	K00265	gltB;	glutamate	synthase	(NADPH)	large	chain	[EC:1.4.1.13]
D	DYST_02546;	K00266	gltD;	glutamate	synthase	(NADPH)	small	chain	[EC:1.4.1.13]
D	DYST_01469;	K15371	GDH2;	glutamate	dehydrogenase	[EC:1.4.1.2]
D	DYST_03458;	K13821	putA;	RHH-type	transcriptional	regulator,	proline	utilization	regulon	repressor	/	proline	dehydrogenase	/	delta	1-pyrroline-5-carboxylate	dehydrogenase	[EC:1.5.5.2	1.2.1.88]
D	DYST_03025;	K01915	glnA,	GLUL;	glutamine	synthetase	[EC:6.3.1.2]
D	DYST_00109;	K01955	carB,	CPA2;	carbamoyl-phosphate	synthase	large	subunit	[EC:6.3.5.5]
D	DYST_00108;	K01956	carA,	CPA1;	carbamoyl-phosphate	synthase	small	subunit	[EC:6.3.5.5]
D	DYST_01396;	K01425	glsA,	GLS;	glutaminase	[EC:3.5.1.2]
D	DYST_02143;	K00820	glmS,	GFPT;	glutamine---fructose-6-phosphate	transaminase	(isomerizing)	[EC:2.6.1.16]
D	DYST_02857;	K00820	glmS,	GFPT;	glutamine---fructose-6-phosphate	transaminase	(isomerizing)	[EC:2.6.1.16]
D	DYST_01105;	K00764	purF,	PPAT;	amidophosphoribosyltransferase	[EC:2.4.2.14]
C	260	Glycine,	serine	and	threonine	metabolism	[PATH:ko00260]
D	DYST_04092;	K00928	lysC;	aspartate	kinase	[EC:2.7.2.4]
D	DYST_02073;	K12525	metL;	bifunctional	aspartokinase	/	homoserine	dehydrogenase	2	[EC:2.7.2.4	1.1.1.3]
D	DYST_01213;	K00133	asd;	aspartate-semialdehyde	dehydrogenase	[EC:1.2.1.11]
D	DYST_02873;	K00003	hom;	homoserine	dehydrogenase	[EC:1.1.1.3]
D	DYST_02874;	K00872	thrB;	homoserine	kinase	[EC:2.7.1.39]
D	DYST_02875;	K01733	thrC;	threonine	synthase	[EC:4.2.3.1]
D	DYST_02056;	K01620	ltaE;	threonine	aldolase	[EC:4.1.2.48]
D	DYST_04219;	K00600	glyA,	SHMT;	glycine	hydroxymethyltransferase	[EC:2.1.2.1]
D	DYST_03275;	K01834	PGAM,	gpmA;	2,3-bisphosphoglycerate-dependent	phosphoglycerate	mutase	[EC:5.4.2.11]
D	DYST_04277;	K15918	GLYK;	D-glycerate	3-kinase	[EC:2.7.1.31]
D	DYST_01923;	K00058	serA,	PHGDH;	D-3-phosphoglycerate	dehydrogenase	/	2-oxoglutarate	reductase	[EC:1.1.1.95	1.1.1.399]
D	DYST_00420;	K00831	serC,	PSAT1;	phosphoserine	aminotransferase	[EC:2.6.1.52]
D	DYST_01739;	K16066	ydfG;	3-hydroxy	acid	dehydrogenase	/	malonic	semialdehyde	reductase	[EC:1.1.1.381	1.1.1.-]
D	DYST_01320;	K00639	kbl,	GCAT;	glycine	C-acetyltransferase	[EC:2.3.1.29]
D	DYST_01317;	K00060	tdh;	threonine	3-dehydrogenase	[EC:1.1.1.103]
D	DYST_01290;	K00281	GLDC,	gcvP;	glycine	dehydrogenase	[EC:1.4.4.2]
D	DYST_02108;	K00605	gcvT,	AMT;	aminomethyltransferase	[EC:2.1.2.10]
D	DYST_00022;	K00382	DLD,	lpd,	pdhD;	dihydrolipoamide	dehydrogenase	[EC:1.8.1.4]
D	DYST_03635;	K00382	DLD,	lpd,	pdhD;	dihydrolipoamide	dehydrogenase	[EC:1.8.1.4]
D	DYST_02107;	K02437	gcvH,	GCSH;	glycine	cleavage	system	H	protein
D	DYST_02500;	K00273	DAO,	aao;	D-amino-acid	oxidase	[EC:1.4.3.3]
D	DYST_03301;	K00998	pssA;	CDP-diacylglycerol---serine	O-phosphatidyltransferase	[EC:2.7.8.8]
D	DYST_04266;	K17103	CHO1,	pssA;	CDP-diacylglycerol---serine	O-phosphatidyltransferase	[EC:2.7.8.8]
D	DYST_04533;	K00499	CMO;	choline	monooxygenase	[EC:1.14.15.7]
D	DYST_01458;	K00108	betA,	CHDH;	choline	dehydrogenase	[EC:1.1.99.1]
D	DYST_04799;	K14085	ALDH7A1;	aldehyde	dehydrogenase	family	7	member	A1	[EC:1.2.1.31	1.2.1.8	1.2.1.3]
D	DYST_02144;	K01697	CBS;	cystathionine	beta-synthase	[EC:4.2.1.22]
D	DYST_02137;	K01758	CTH;	cystathionine	gamma-lyase	[EC:4.4.1.1]
D	DYST_02069;	K01752	E4.3.1.17,	sdaA,	sdaB,	tdcG;	L-serine	dehydratase	[EC:4.3.1.17]
D	DYST_02899;	K01754	E4.3.1.19,	ilvA,	tdcB;	threonine	dehydratase	[EC:4.3.1.19]
D	DYST_02940;	K12235	SRR;	serine	racemase	[EC:5.1.1.18]
D	DYST_01794;	K25316	racX,	ygeA;	amino-acid	racemase	[EC:5.1.1.10]
D	DYST_01205;	K01695	trpA;	tryptophan	synthase	alpha	chain	[EC:4.2.1.20]
D	DYST_01206;	K01696	trpB;	tryptophan	synthase	beta	chain	[EC:4.2.1.20]
C	270	Cysteine	and	methionine	metabolism	[PATH:ko00270]
D	DYST_00034;	K01738	cysK;	cysteine	synthase	[EC:2.5.1.47]
D	DYST_01044;	K01738	cysK;	cysteine	synthase	[EC:2.5.1.47]
D	DYST_02137;	K01758	CTH;	cystathionine	gamma-lyase	[EC:4.4.1.1]
D	DYST_02144;	K01697	CBS;	cystathionine	beta-synthase	[EC:4.2.1.22]
D	DYST_01479;	K00548	metH,	MTR;	5-methyltetrahydrofolate--homocysteine	methyltransferase	[EC:2.1.1.13]
D	DYST_01478;	K24042	yitJ;	methionine	synthase	/	methylenetetrahydrofolate	reductase	(NADH)	[EC:2.1.1.13	1.5.1.54]
D	DYST_02289;	K00549	metE;	5-methyltetrahydropteroyltriglutamate--homocysteine	methyltransferase	[EC:2.1.1.14]
D	DYST_03850;	K00789	metK,	MAT;	S-adenosylmethionine	synthetase	[EC:2.5.1.6]
D	DYST_03682;	K01611	speD,	AMD1;	S-adenosylmethionine	decarboxylase	[EC:4.1.1.50]
D	DYST_02991;	K00797	speE,	SRM,	SPE3;	spermidine	synthase	[EC:2.5.1.16]
D	DYST_00856;	K00772	mtaP,	MTAP;	5'-methylthioadenosine	phosphorylase	[EC:2.4.2.28]
D	DYST_01695;	K12960	mtaD;	5-methylthioadenosine/S-adenosylhomocysteine	deaminase	[EC:3.5.4.31	3.5.4.28]
D	DYST_00011;	K08963	mtnA;	methylthioribose-1-phosphate	isomerase	[EC:5.3.1.23]
D	DYST_01050;	K08964	mtnB;	methylthioribulose-1-phosphate	dehydratase	[EC:4.2.1.109]
D	DYST_01820;	K08966	mtnX;	2-hydroxy-3-keto-5-methylthiopentenyl-1-phosphate	phosphatase	[EC:3.1.3.87]
D	DYST_01052;	K09880	mtnC,	ENOPH1;	enolase-phosphatase	E1	[EC:3.1.3.77]
D	DYST_01051;	K08967	mtnD,	mtnZ,	ADI1;	1,2-dihydroxy-3-keto-5-methylthiopentene	dioxygenase	[EC:1.13.11.53	1.13.11.54]
D	DYST_03306;	K00832	tyrB;	aromatic-amino-acid	transaminase	[EC:2.6.1.57]
D	DYST_03502;	K08968	msrC;	L-methionine	(R)-S-oxide	reductase	[EC:1.8.4.14]
D	DYST_00210;	K00558	DNMT1,	dcm;	DNA	(cytosine-5)-methyltransferase	1	[EC:2.1.1.37]
D	DYST_01302;	K00558	DNMT1,	dcm;	DNA	(cytosine-5)-methyltransferase	1	[EC:2.1.1.37]
D	DYST_03841;	K01251	E3.3.1.1,	ahcY;	adenosylhomocysteinase	[EC:3.3.1.1]
D	DYST_04092;	K00928	lysC;	aspartate	kinase	[EC:2.7.2.4]
D	DYST_02073;	K12525	metL;	bifunctional	aspartokinase	/	homoserine	dehydrogenase	2	[EC:2.7.2.4	1.1.1.3]
D	DYST_01213;	K00133	asd;	aspartate-semialdehyde	dehydrogenase	[EC:1.2.1.11]
D	DYST_02873;	K00003	hom;	homoserine	dehydrogenase	[EC:1.1.1.3]
D	DYST_04834;	K00641	metX;	homoserine	O-acetyltransferase/O-succinyltransferase	[EC:2.3.1.31	2.3.1.46]
D	DYST_02074;	K01739	metB;	cystathionine	gamma-synthase	[EC:2.5.1.48]
D	DYST_02890;	K00826	E2.6.1.42,	ilvE;	branched-chain	amino	acid	aminotransferase	[EC:2.6.1.42]
D	DYST_03827;	K00826	E2.6.1.42,	ilvE;	branched-chain	amino	acid	aminotransferase	[EC:2.6.1.42]
D	DYST_03522;	K01919	gshA;	glutamate--cysteine	ligase	[EC:6.3.2.2]
D	DYST_02038;	K01920	gshB;	glutathione	synthase	[EC:6.3.2.3]
D	DYST_01341;	K00812	aspB;	aspartate	aminotransferase	[EC:2.6.1.1]
D	DYST_04632;	K01011	TST,	MPST,	sseA;	thiosulfate/3-mercaptopyruvate	sulfurtransferase	[EC:2.8.1.1	2.8.1.2]
D	DYST_01794;	K25316	racX,	ygeA;	amino-acid	racemase	[EC:5.1.1.10]
D	DYST_01340;	K00024	mdh;	malate	dehydrogenase	[EC:1.1.1.37]
D	DYST_02069;	K01752	E4.3.1.17,	sdaA,	sdaB,	tdcG;	L-serine	dehydratase	[EC:4.3.1.17]
D	DYST_01923;	K00058	serA,	PHGDH;	D-3-phosphoglycerate	dehydrogenase	/	2-oxoglutarate	reductase	[EC:1.1.1.95	1.1.1.399]
D	DYST_00420;	K00831	serC,	PSAT1;	phosphoserine	aminotransferase	[EC:2.6.1.52]
C	280	Valine,	leucine	and	isoleucine	degradation	[PATH:ko00280]
D	DYST_02890;	K00826	E2.6.1.42,	ilvE;	branched-chain	amino	acid	aminotransferase	[EC:2.6.1.42]
D	DYST_03827;	K00826	E2.6.1.42,	ilvE;	branched-chain	amino	acid	aminotransferase	[EC:2.6.1.42]
D	DYST_01610;	K00263	E1.4.1.9;	leucine	dehydrogenase	[EC:1.4.1.9]
D	DYST_02175;	K00166	BCKDHA,	bkdA1;	2-oxoisovalerate	dehydrogenase	E1	component	alpha	subunit	[EC:1.2.4.4]
D	DYST_02176;	K00167	BCKDHB,	bkdA2;	2-oxoisovalerate	dehydrogenase	E1	component	beta	subunit	[EC:1.2.4.4]
D	DYST_02177;	K09699	DBT,	bkdB;	2-oxoisovalerate	dehydrogenase	E2	component	(dihydrolipoyl	transacylase)	[EC:2.3.1.168]
D	DYST_00022;	K00382	DLD,	lpd,	pdhD;	dihydrolipoamide	dehydrogenase	[EC:1.8.1.4]
D	DYST_03635;	K00382	DLD,	lpd,	pdhD;	dihydrolipoamide	dehydrogenase	[EC:1.8.1.4]
D	DYST_01476;	K00248	ACADS,	bcd;	butyryl-CoA	dehydrogenase	[EC:1.3.8.1]
D	DYST_04056;	K00249	ACADM,	acd;	acyl-CoA	dehydrogenase	[EC:1.3.8.7]
D	DYST_04373;	K00249	ACADM,	acd;	acyl-CoA	dehydrogenase	[EC:1.3.8.7]
D	DYST_01613;	K00253	IVD,	ivd;	isovaleryl-CoA	dehydrogenase	[EC:1.3.8.4]
D	DYST_00877;	K01782	fadJ;	3-hydroxyacyl-CoA	dehydrogenase	/	enoyl-CoA	hydratase	/	3-hydroxybutyryl-CoA	epimerase	[EC:1.1.1.35	4.2.1.17	5.1.2.3]
D	DYST_01660;	K08683	HSD17B10;	3-hydroxyacyl-CoA	dehydrogenase	/	3-hydroxy-2-methylbutyryl-CoA	dehydrogenase	[EC:1.1.1.35	1.1.1.178]
D	DYST_00438;	K00632	fadA,	fadI;	acetyl-CoA	acyltransferase	[EC:2.3.1.16]
D	DYST_01089;	K00632	fadA,	fadI;	acetyl-CoA	acyltransferase	[EC:2.3.1.16]
D	DYST_01592;	K01848	E5.4.99.2A,	mcmA1;	methylmalonyl-CoA	mutase,	N-terminal	domain	[EC:5.4.99.2]
D	DYST_02986;	K00020	HIBADH,	mmsB;	3-hydroxyisobutyrate	dehydrogenase	[EC:1.1.1.31]
D	DYST_00669;	K00128	ALDH;	aldehyde	dehydrogenase	(NAD+)	[EC:1.2.1.3]
D	DYST_01095;	K00128	ALDH;	aldehyde	dehydrogenase	(NAD+)	[EC:1.2.1.3]
D	DYST_04799;	K14085	ALDH7A1;	aldehyde	dehydrogenase	family	7	member	A1	[EC:1.2.1.31	1.2.1.8	1.2.1.3]
D	DYST_01647;	K01968	E6.4.1.4A;	3-methylcrotonyl-CoA	carboxylase	alpha	subunit	[EC:6.4.1.4]
D	DYST_01618;	K01969	E6.4.1.4B;	3-methylcrotonyl-CoA	carboxylase	beta	subunit	[EC:6.4.1.4]
D	DYST_01644;	K13766	liuC;	methylglutaconyl-CoA	hydratase	[EC:4.2.1.18]
D	DYST_01651;	K01640	HMGCL,	hmgL;	hydroxymethylglutaryl-CoA	lyase	[EC:4.1.3.4]
D	DYST_02012;	K01027	OXCT;	3-oxoacid	CoA-transferase	[EC:2.8.3.5]
D	DYST_01616;	K00626	ACAT,	atoB;	acetyl-CoA	C-acetyltransferase	[EC:2.3.1.9]
D	DYST_02999;	K00626	ACAT,	atoB;	acetyl-CoA	C-acetyltransferase	[EC:2.3.1.9]
C	290	Valine,	leucine	and	isoleucine	biosynthesis	[PATH:ko00290]
D	DYST_02899;	K01754	E4.3.1.19,	ilvA,	tdcB;	threonine	dehydratase	[EC:4.3.1.19]
D	DYST_02892;	K01703	leuC,	IPMI-L;	3-isopropylmalate/(R)-2-methylmalate	dehydratase	large	subunit	[EC:4.2.1.33	4.2.1.35]
D	DYST_02893;	K01704	leuD,	IPMI-S;	3-isopropylmalate/(R)-2-methylmalate	dehydratase	small	subunit	[EC:4.2.1.33	4.2.1.35]
D	DYST_02894;	K00052	leuB,	IMDH;	3-isopropylmalate	dehydrogenase	[EC:1.1.1.85]
D	DYST_00828;	K01652	E2.2.1.6L,	ilvB,	ilvG,	ilvI;	acetolactate	synthase	I/II/III	large	subunit	[EC:2.2.1.6]
D	DYST_02897;	K01652	E2.2.1.6L,	ilvB,	ilvG,	ilvI;	acetolactate	synthase	I/II/III	large	subunit	[EC:2.2.1.6]
D	DYST_02898;	K01653	E2.2.1.6S,	ilvH,	ilvN;	acetolactate	synthase	I/III	small	subunit	[EC:2.2.1.6]
D	DYST_02896;	K00053	ilvC;	ketol-acid	reductoisomerase	[EC:1.1.1.86]
D	DYST_02895;	K01687	ilvD;	dihydroxy-acid	dehydratase	[EC:4.2.1.9]
D	DYST_02890;	K00826	E2.6.1.42,	ilvE;	branched-chain	amino	acid	aminotransferase	[EC:2.6.1.42]
D	DYST_03827;	K00826	E2.6.1.42,	ilvE;	branched-chain	amino	acid	aminotransferase	[EC:2.6.1.42]
D	DYST_01610;	K00263	E1.4.1.9;	leucine	dehydrogenase	[EC:1.4.1.9]
D	DYST_03582;	K14260	alaA;	alanine-synthesizing	transaminase	[EC:2.6.1.66	2.6.1.2]
D	DYST_02889;	K01649	leuA,	IMS;	2-isopropylmalate	synthase	[EC:2.3.3.13]
C	300	Lysine	biosynthesis	[PATH:ko00300]
D	DYST_02873;	K00003	hom;	homoserine	dehydrogenase	[EC:1.1.1.3]
D	DYST_04092;	K00928	lysC;	aspartate	kinase	[EC:2.7.2.4]
D	DYST_02073;	K12525	metL;	bifunctional	aspartokinase	/	homoserine	dehydrogenase	2	[EC:2.7.2.4	1.1.1.3]
D	DYST_01213;	K00133	asd;	aspartate-semialdehyde	dehydrogenase	[EC:1.2.1.11]
D	DYST_04612;	K01714	dapA;	4-hydroxy-tetrahydrodipicolinate	synthase	[EC:4.3.3.7]
D	DYST_00102;	K00215	dapB;	4-hydroxy-tetrahydrodipicolinate	reductase	[EC:1.17.1.8]
D	DYST_04494;	K00674	dapD;	2,3,4,5-tetrahydropyridine-2,6-dicarboxylate	N-succinyltransferase	[EC:2.3.1.117]
D	DYST_02407;	K00821	argD;	acetylornithine/N-succinyldiaminopimelate	aminotransferase	[EC:2.6.1.11	2.6.1.17]
D	DYST_04497;	K01439	dapE;	succinyl-diaminopimelate	desuccinylase	[EC:3.5.1.18]
D	DYST_03110;	K01778	dapF;	diaminopimelate	epimerase	[EC:5.1.1.7]
D	DYST_03667;	K01586	lysA;	diaminopimelate	decarboxylase	[EC:4.1.1.20]
D	DYST_03891;	K01928	murE;	UDP-N-acetylmuramoyl-L-alanyl-D-glutamate--2,6-diaminopimelate	ligase	[EC:6.3.2.13]
D	DYST_03892;	K01929	murF;	UDP-N-acetylmuramoyl-tripeptide--D-alanyl-D-alanine	ligase	[EC:6.3.2.10]
C	310	Lysine	degradation	[PATH:ko00310]
D	DYST_04799;	K14085	ALDH7A1;	aldehyde	dehydrogenase	family	7	member	A1	[EC:1.2.1.31	1.2.1.8	1.2.1.3]
D	DYST_00023;	K00658	DLST,	sucB;	2-oxoglutarate	dehydrogenase	E2	component	(dihydrolipoamide	succinyltransferase)	[EC:2.3.1.61]
D	DYST_00022;	K00382	DLD,	lpd,	pdhD;	dihydrolipoamide	dehydrogenase	[EC:1.8.1.4]
D	DYST_03635;	K00382	DLD,	lpd,	pdhD;	dihydrolipoamide	dehydrogenase	[EC:1.8.1.4]
D	DYST_01451;	K00252	GCDH,	gcdH;	glutaryl-CoA	dehydrogenase	[EC:1.3.8.6]
D	DYST_00877;	K01782	fadJ;	3-hydroxyacyl-CoA	dehydrogenase	/	enoyl-CoA	hydratase	/	3-hydroxybutyryl-CoA	epimerase	[EC:1.1.1.35	4.2.1.17	5.1.2.3]
D	DYST_01616;	K00626	ACAT,	atoB;	acetyl-CoA	C-acetyltransferase	[EC:2.3.1.9]
D	DYST_02999;	K00626	ACAT,	atoB;	acetyl-CoA	C-acetyltransferase	[EC:2.3.1.9]
D	DYST_01794;	K25316	racX,	ygeA;	amino-acid	racemase	[EC:5.1.1.10]
D	DYST_00577;	K18826	CAMKMT;	calmodulin-lysine	N-methyltransferase	[EC:2.1.1.60]
D	DYST_04070;	K11422	SETD1,	SET1;	[histone	H3]-lysine4	N-trimethyltransferase	SETD1	[EC:2.1.1.354]
D	DYST_00669;	K00128	ALDH;	aldehyde	dehydrogenase	(NAD+)	[EC:1.2.1.3]
D	DYST_01095;	K00128	ALDH;	aldehyde	dehydrogenase	(NAD+)	[EC:1.2.1.3]
C	220	Arginine	biosynthesis	[PATH:ko00220]
D	DYST_01682;	K00611	OTC,	argF,	argI;	ornithine	carbamoyltransferase	[EC:2.1.3.3]
D	DYST_01679;	K01940	argG,	ASS1;	argininosuccinate	synthase	[EC:6.3.4.5]
D	DYST_01674;	K01755	argH,	ASL;	argininosuccinate	lyase	[EC:4.3.2.1]
D	DYST_02184;	K01476	E3.5.3.1,	rocF,	arg;	arginase	[EC:3.5.3.1]
D	DYST_02652;	K01476	E3.5.3.1,	rocF,	arg;	arginase	[EC:3.5.3.1]
D	DYST_01396;	K01425	glsA,	GLS;	glutaminase	[EC:3.5.1.2]
D	DYST_03025;	K01915	glnA,	GLUL;	glutamine	synthetase	[EC:6.3.1.2]
D	DYST_01469;	K15371	GDH2;	glutamate	dehydrogenase	[EC:1.4.1.2]
D	DYST_01341;	K00812	aspB;	aspartate	aminotransferase	[EC:2.6.1.1]
D	DYST_03582;	K14260	alaA;	alanine-synthesizing	transaminase	[EC:2.6.1.66	2.6.1.2]
D	DYST_01675;	K00145	argC;	N-acetyl-gamma-glutamyl-phosphate	reductase	[EC:1.2.1.38]
D	DYST_01676;	K12659	ARG56;	N-acetyl-gamma-glutamyl-phosphate	reductase	/	acetylglutamate	kinase	[EC:1.2.1.38	2.7.2.8]
D	DYST_02407;	K00821	argD;	acetylornithine/N-succinyldiaminopimelate	aminotransferase	[EC:2.6.1.11	2.6.1.17]
D	DYST_01677;	K01438	argE;	acetylornithine	deacetylase	[EC:3.5.1.16]
C	330	Arginine	and	proline	metabolism	[PATH:ko00330]
D	DYST_02782;	K01584	adiA;	arginine	decarboxylase	[EC:4.1.1.19]
D	DYST_02990;	K01585	speA;	arginine	decarboxylase	[EC:4.1.1.19]
D	DYST_00227;	K10536	aguA;	agmatine	deiminase	[EC:3.5.3.12]
D	DYST_01006;	K10536	aguA;	agmatine	deiminase	[EC:3.5.3.12]
D	DYST_00226;	K12251	aguB;	N-carbamoylputrescine	amidase	[EC:3.5.1.53]
D	DYST_02991;	K00797	speE,	SRM,	SPE3;	spermidine	synthase	[EC:2.5.1.16]
D	DYST_03682;	K01611	speD,	AMD1;	S-adenosylmethionine	decarboxylase	[EC:4.1.1.50]
D	DYST_00669;	K00128	ALDH;	aldehyde	dehydrogenase	(NAD+)	[EC:1.2.1.3]
D	DYST_01095;	K00128	ALDH;	aldehyde	dehydrogenase	(NAD+)	[EC:1.2.1.3]
D	DYST_04799;	K14085	ALDH7A1;	aldehyde	dehydrogenase	family	7	member	A1	[EC:1.2.1.31	1.2.1.8	1.2.1.3]
D	DYST_00124;	K09471	puuB,	ordL;	gamma-glutamylputrescine	oxidase	[EC:1.4.3.-]
D	DYST_02184;	K01476	E3.5.3.1,	rocF,	arg;	arginase	[EC:3.5.3.1]
D	DYST_02652;	K01476	E3.5.3.1,	rocF,	arg;	arginase	[EC:3.5.3.1]
D	DYST_02049;	K00286	proC;	pyrroline-5-carboxylate	reductase	[EC:1.5.1.2]
D	DYST_03458;	K13821	putA;	RHH-type	transcriptional	regulator,	proline	utilization	regulon	repressor	/	proline	dehydrogenase	/	delta	1-pyrroline-5-carboxylate	dehydrogenase	[EC:1.5.5.2	1.2.1.88]
D	DYST_01672;	K00931	proB;	glutamate	5-kinase	[EC:2.7.2.11]
D	DYST_01671;	K00147	proA;	glutamate-5-semialdehyde	dehydrogenase	[EC:1.2.1.41]
D	DYST_01920;	K01259	pip;	proline	iminopeptidase	[EC:3.4.11.5]
D	DYST_02426;	K00472	P4HA;	prolyl	4-hydroxylase	[EC:1.14.11.2]
D	DYST_01341;	K00812	aspB;	aspartate	aminotransferase	[EC:2.6.1.1]
D	DYST_02500;	K00273	DAO,	aao;	D-amino-acid	oxidase	[EC:1.4.3.3]
C	340	Histidine	metabolism	[PATH:ko00340]
D	DYST_01066;	K00765	hisG;	ATP	phosphoribosyltransferase	[EC:2.4.2.17]
D	DYST_01059;	K11755	hisIE;	phosphoribosyl-AMP	cyclohydrolase	/	phosphoribosyl-ATP	pyrophosphohydrolase	[EC:3.5.4.19	3.6.1.31]
D	DYST_01061;	K01814	hisA;	phosphoribosylformimino-5-aminoimidazole	carboxamide	ribotide	isomerase	[EC:5.3.1.16]
D	DYST_01062;	K02501	hisH;	imidazole	glycerol-phosphate	synthase	subunit	HisH	[EC:4.3.2.10]
D	DYST_01060;	K02500	hisF;	imidazole	glycerol-phosphate	synthase	subunit	HisF	[EC:4.3.2.10]
D	DYST_01063;	K01089	hisB;	imidazoleglycerol-phosphate	dehydratase	/	histidinol-phosphatase	[EC:4.2.1.19	3.1.3.15]
D	DYST_01064;	K00817	hisC;	histidinol-phosphate	aminotransferase	[EC:2.6.1.9]
D	DYST_01065;	K00013	hisD;	histidinol	dehydrogenase	[EC:1.1.1.23]
D	DYST_01071;	K01745	hutH,	HAL;	histidine	ammonia-lyase	[EC:4.3.1.3]
D	DYST_01163;	K01712	hutU,	UROC1;	urocanate	hydratase	[EC:4.2.1.49]
D	DYST_01187;	K01468	hutI,	AMDHD1;	imidazolonepropionase	[EC:3.5.2.7]
D	DYST_01184;	K05603	hutF;	formimidoylglutamate	deiminase	[EC:3.5.3.13]
D	DYST_01724;	K01458	hutG;	N-formylglutamate	deformylase	[EC:3.5.1.68]
D	DYST_00669;	K00128	ALDH;	aldehyde	dehydrogenase	(NAD+)	[EC:1.2.1.3]
D	DYST_01095;	K00128	ALDH;	aldehyde	dehydrogenase	(NAD+)	[EC:1.2.1.3]
D	DYST_04799;	K14085	ALDH7A1;	aldehyde	dehydrogenase	family	7	member	A1	[EC:1.2.1.31	1.2.1.8	1.2.1.3]
D	DYST_04784;	K18911	egtD;	L-histidine	Nalpha-methyltransferase	[EC:2.1.1.44]
D	DYST_04783;	K18912	egtB;	gamma-glutamyl	hercynylcysteine	S-oxide	synthase	[EC:1.14.99.50]
C	350	Tyrosine	metabolism	[PATH:ko00350]
D	DYST_01341;	K00812	aspB;	aspartate	aminotransferase	[EC:2.6.1.1]
D	DYST_01064;	K00817	hisC;	histidinol-phosphate	aminotransferase	[EC:2.6.1.9]
D	DYST_03306;	K00832	tyrB;	aromatic-amino-acid	transaminase	[EC:2.6.1.57]
D	DYST_02170;	K00457	HPD,	hppD;	4-hydroxyphenylpyruvate	dioxygenase	[EC:1.13.11.27]
D	DYST_02168;	K00451	HGD,	hmgA;	homogentisate	1,2-dioxygenase	[EC:1.13.11.5]
D	DYST_02167;	K16171	faaH;	fumarylacetoacetate	(FAA)	hydrolase	[EC:3.7.1.2]
D	DYST_01839;	K01593	DDC,	TDC;	aromatic-L-amino-acid/L-tryptophan	decarboxylase	[EC:4.1.1.28	4.1.1.105]
D	DYST_01403;	K00121	frmA,	ADH5,	adhC;	S-(hydroxymethyl)glutathione	dehydrogenase	/	alcohol	dehydrogenase	[EC:1.1.1.284	1.1.1.1]
D	DYST_04774;	K13953	adhP;	alcohol	dehydrogenase,	propanol-preferring	[EC:1.1.1.1]
D	DYST_02150;	K01801	nagL;	maleylpyruvate	isomerase	[EC:5.2.1.4]
D	DYST_03805;	K16165	nagK;	fumarylpyruvate	hydrolase	[EC:3.7.1.20]
C	360	Phenylalanine	metabolism	[PATH:ko00360]
D	DYST_03055;	K00500	phhA,	PAH;	phenylalanine-4-hydroxylase	[EC:1.14.16.1]
D	DYST_01839;	K01593	DDC,	TDC;	aromatic-L-amino-acid/L-tryptophan	decarboxylase	[EC:4.1.1.28	4.1.1.105]
D	DYST_01548;	K01912	paaK;	phenylacetate-CoA	ligase	[EC:6.2.1.30]
D	DYST_01341;	K00812	aspB;	aspartate	aminotransferase	[EC:2.6.1.1]
D	DYST_01064;	K00817	hisC;	histidinol-phosphate	aminotransferase	[EC:2.6.1.9]
D	DYST_03306;	K00832	tyrB;	aromatic-amino-acid	transaminase	[EC:2.6.1.57]
D	DYST_02170;	K00457	HPD,	hppD;	4-hydroxyphenylpyruvate	dioxygenase	[EC:1.13.11.27]
D	DYST_01726;	K00285	dadA;	D-amino-acid	dehydrogenase	[EC:1.4.5.1]
D	DYST_01727;	K00285	dadA;	D-amino-acid	dehydrogenase	[EC:1.4.5.1]
D	DYST_01554;	K03782	katG;	catalase-peroxidase	[EC:1.11.1.21]
D	DYST_01827;	K05710	hcaC;	3-phenylpropionate/trans-cinnamate	dioxygenase	ferredoxin	component
C	380	Tryptophan	metabolism	[PATH:ko00380]
D	DYST_02174;	K00453	TDO2,	kynA;	tryptophan	2,3-dioxygenase	[EC:1.13.11.11]
D	DYST_04845;	K00486	KMO;	kynurenine	3-monooxygenase	[EC:1.14.13.9]
D	DYST_01667;	K01556	KYNU,	kynU;	kynureninase	[EC:3.7.1.3]
D	DYST_01045;	K00452	HAAO;	3-hydroxyanthranilate	3,4-dioxygenase	[EC:1.13.11.6]
D	DYST_01665;	K03392	ACMSD;	aminocarboxymuconate-semialdehyde	decarboxylase	[EC:4.1.1.45]
D	DYST_01720;	K23234	ALDH8A1;	aminomuconate-semialdehyde	dehydrogenase	[EC:1.2.1.32]
D	DYST_00023;	K00658	DLST,	sucB;	2-oxoglutarate	dehydrogenase	E2	component	(dihydrolipoamide	succinyltransferase)	[EC:2.3.1.61]
D	DYST_00022;	K00382	DLD,	lpd,	pdhD;	dihydrolipoamide	dehydrogenase	[EC:1.8.1.4]
D	DYST_03635;	K00382	DLD,	lpd,	pdhD;	dihydrolipoamide	dehydrogenase	[EC:1.8.1.4]
D	DYST_01451;	K00252	GCDH,	gcdH;	glutaryl-CoA	dehydrogenase	[EC:1.3.8.6]
D	DYST_00877;	K01782	fadJ;	3-hydroxyacyl-CoA	dehydrogenase	/	enoyl-CoA	hydratase	/	3-hydroxybutyryl-CoA	epimerase	[EC:1.1.1.35	4.2.1.17	5.1.2.3]
D	DYST_01616;	K00626	ACAT,	atoB;	acetyl-CoA	C-acetyltransferase	[EC:2.3.1.9]
D	DYST_02999;	K00626	ACAT,	atoB;	acetyl-CoA	C-acetyltransferase	[EC:2.3.1.9]
D	DYST_01839;	K01593	DDC,	TDC;	aromatic-L-amino-acid/L-tryptophan	decarboxylase	[EC:4.1.1.28	4.1.1.105]
D	DYST_00669;	K00128	ALDH;	aldehyde	dehydrogenase	(NAD+)	[EC:1.2.1.3]
D	DYST_01095;	K00128	ALDH;	aldehyde	dehydrogenase	(NAD+)	[EC:1.2.1.3]
D	DYST_04799;	K14085	ALDH7A1;	aldehyde	dehydrogenase	family	7	member	A1	[EC:1.2.1.31	1.2.1.8	1.2.1.3]
D	DYST_01140;	K03781	katE,	CAT,	catB,	srpA;	catalase	[EC:1.11.1.6]
D	DYST_01554;	K03782	katG;	catalase-peroxidase	[EC:1.11.1.21]
C	400	Phenylalanine,	tyrosine	and	tryptophan	biosynthesis	[PATH:ko00400]
D	DYST_04448;	K01626	E2.5.1.54,	aroF,	aroG,	aroH;	3-deoxy-7-phosphoheptulonate	synthase	[EC:2.5.1.54]
D	DYST_04536;	K01626	E2.5.1.54,	aroF,	aroG,	aroH;	3-deoxy-7-phosphoheptulonate	synthase	[EC:2.5.1.54]
D	DYST_04273;	K01735	aroB;	3-dehydroquinate	synthase	[EC:4.2.3.4]
D	DYST_02475;	K03786	aroQ,	qutE;	3-dehydroquinate	dehydratase	II	[EC:4.2.1.10]
D	DYST_03116;	K00014	aroE;	shikimate	dehydrogenase	[EC:1.1.1.25]
D	DYST_04274;	K00891	aroK,	aroL;	shikimate	kinase	[EC:2.7.1.71]
D	DYST_00422;	K00800	aroA;	3-phosphoshikimate	1-carboxyvinyltransferase	[EC:2.5.1.19]
D	DYST_01215;	K01736	aroC;	chorismate	synthase	[EC:4.2.3.5]
D	DYST_03659;	K01657	trpE;	anthranilate	synthase	component	I	[EC:4.1.3.27]
D	DYST_03676;	K01658	trpG;	anthranilate	synthase	component	II	[EC:4.1.3.27]
D	DYST_03677;	K00766	trpD;	anthranilate	phosphoribosyltransferase	[EC:2.4.2.18]
D	DYST_01209;	K01817	trpF;	phosphoribosylanthranilate	isomerase	[EC:5.3.1.24]
D	DYST_03678;	K01609	trpC;	indole-3-glycerol	phosphate	synthase	[EC:4.1.1.48]
D	DYST_01205;	K01695	trpA;	tryptophan	synthase	alpha	chain	[EC:4.2.1.20]
D	DYST_01206;	K01696	trpB;	tryptophan	synthase	beta	chain	[EC:4.2.1.20]
D	DYST_00421;	K14170	pheA;	chorismate	mutase	/	prephenate	dehydratase	[EC:5.4.99.5	4.2.1.51]
D	DYST_01341;	K00812	aspB;	aspartate	aminotransferase	[EC:2.6.1.1]
D	DYST_01064;	K00817	hisC;	histidinol-phosphate	aminotransferase	[EC:2.6.1.9]
D	DYST_03306;	K00832	tyrB;	aromatic-amino-acid	transaminase	[EC:2.6.1.57]
D	DYST_03055;	K00500	phhA,	PAH;	phenylalanine-4-hydroxylase	[EC:1.14.16.1]
B
B	9106	Metabolism	of	other	amino	acids
C	410	beta-Alanine	metabolism	[PATH:ko00410]
D	DYST_04620;	K01579	panD;	aspartate	1-decarboxylase	[EC:4.1.1.11]
D	DYST_01819;	K00823	puuE;	4-aminobutyrate	aminotransferase	[EC:2.6.1.19]
D	DYST_00669;	K00128	ALDH;	aldehyde	dehydrogenase	(NAD+)	[EC:1.2.1.3]
D	DYST_01095;	K00128	ALDH;	aldehyde	dehydrogenase	(NAD+)	[EC:1.2.1.3]
D	DYST_04799;	K14085	ALDH7A1;	aldehyde	dehydrogenase	family	7	member	A1	[EC:1.2.1.31	1.2.1.8	1.2.1.3]
D	DYST_04619;	K01918	panC;	pantoate--beta-alanine	ligase	[EC:6.3.2.1]
D	DYST_00877;	K01782	fadJ;	3-hydroxyacyl-CoA	dehydrogenase	/	enoyl-CoA	hydratase	/	3-hydroxybutyryl-CoA	epimerase	[EC:1.1.1.35	4.2.1.17	5.1.2.3]
D	DYST_01086;	K14729	FOX2;	multifunctional	beta-oxidation	protein	[EC:4.2.1.-	1.1.1.-]
D	DYST_01476;	K00248	ACADS,	bcd;	butyryl-CoA	dehydrogenase	[EC:1.3.8.1]
C	430	Taurine	and	hypotaurine	metabolism	[PATH:ko00430]
D	DYST_04173;	K00681	ggt;	gamma-glutamyltranspeptidase	/	glutathione	hydrolase	[EC:2.3.2.2	3.4.19.13]
D	DYST_00812;	K00259	ald;	alanine	dehydrogenase	[EC:1.4.1.1]
D	DYST_01469;	K15371	GDH2;	glutamate	dehydrogenase	[EC:1.4.1.2]
C	440	Phosphonate	and	phosphinate	metabolism	[PATH:ko00440]
D	DYST_02461;	K05306	phnX;	phosphonoacetaldehyde	hydrolase	[EC:3.11.1.1]
D	DYST_02465;	K06162	phnM;	alpha-D-ribose	1-methylphosphonate	5-triphosphate	diphosphatase	[EC:3.6.1.63]
C	450	Selenocompound	metabolism	[PATH:ko00450]
D	DYST_02074;	K01739	metB;	cystathionine	gamma-synthase	[EC:2.5.1.48]
D	DYST_01479;	K00548	metH,	MTR;	5-methyltetrahydrofolate--homocysteine	methyltransferase	[EC:2.1.1.13]
D	DYST_01478;	K24042	yitJ;	methionine	synthase	/	methylenetetrahydrofolate	reductase	(NADH)	[EC:2.1.1.13	1.5.1.54]
D	DYST_02289;	K00549	metE;	5-methyltetrahydropteroyltriglutamate--homocysteine	methyltransferase	[EC:2.1.1.14]
D	DYST_02137;	K01758	CTH;	cystathionine	gamma-lyase	[EC:4.4.1.1]
D	DYST_01840;	K11717	sufS;	cysteine	desulfurase	/	selenocysteine	lyase	[EC:2.8.1.7	4.4.1.16]
D	DYST_00813;	K00384	trxB,	TRR;	thioredoxin	reductase	(NADPH)	[EC:1.8.1.9]
D	DYST_04059;	K00384	trxB,	TRR;	thioredoxin	reductase	(NADPH)	[EC:1.8.1.9]
D	DYST_04080;	K12528	xdhD;	putative	selenate	reductase	molybdopterin-binding	subunit
D	DYST_02109;	K00955	cysNC;	bifunctional	enzyme	CysN/CysC	[EC:2.7.7.4	2.7.1.25]
D	DYST_02110;	K00957	cysD;	sulfate	adenylyltransferase	subunit	2	[EC:2.7.7.4]
D	DYST_00031;	K00958	sat,	met3;	sulfate	adenylyltransferase	[EC:2.7.7.4]
D	DYST_01527;	K01008	selD,	SEPHS;	selenide,	water	dikinase	[EC:2.7.9.3]
D	DYST_01529;	K01042	selA;	L-seryl-tRNA(Ser)	seleniumtransferase	[EC:2.9.1.1]
D	DYST_01239;	K01874	MARS,	metG;	methionyl-tRNA	synthetase	[EC:6.1.1.10]
C	460	Cyanoamino	acid	metabolism	[PATH:ko00460]
D	DYST_03369;	K05349	bglX;	beta-glucosidase	[EC:3.2.1.21]
D	DYST_03401;	K05349	bglX;	beta-glucosidase	[EC:3.2.1.21]
D	DYST_04173;	K00681	ggt;	gamma-glutamyltranspeptidase	/	glutathione	hydrolase	[EC:2.3.2.2	3.4.19.13]
D	DYST_02011;	K13051	ASRGL1,	iaaA;	L-asparaginase	/	beta-aspartyl-peptidase	[EC:3.5.1.1	3.4.19.5]
D	DYST_04219;	K00600	glyA,	SHMT;	glycine	hydroxymethyltransferase	[EC:2.1.2.1]
C	470	D-Amino	acid	metabolism	[PATH:ko00470]
D	DYST_01708;	K01775	alr;	alanine	racemase	[EC:5.1.1.1]
D	DYST_03897;	K01921	ddl;	D-alanine-D-alanine	ligase	[EC:6.3.2.4]
D	DYST_01794;	K25316	racX,	ygeA;	amino-acid	racemase	[EC:5.1.1.10]
D	DYST_01396;	K01425	glsA,	GLS;	glutaminase	[EC:3.5.1.2]
D	DYST_04094;	K01925	murD;	UDP-N-acetylmuramoylalanine--D-glutamate	ligase	[EC:6.3.2.9]
D	DYST_02940;	K12235	SRR;	serine	racemase	[EC:5.1.1.18]
D	DYST_03110;	K01778	dapF;	diaminopimelate	epimerase	[EC:5.1.1.7]
D	DYST_03667;	K01586	lysA;	diaminopimelate	decarboxylase	[EC:4.1.1.20]
D	DYST_02500;	K00273	DAO,	aao;	D-amino-acid	oxidase	[EC:1.4.3.3]
D	DYST_03675;	K19746	dauA;	D-arginine	dehydrogenase	[EC:1.4.99.6]
D	DYST_01598;	K12658	lhpA;	4-hydroxyproline	epimerase	[EC:5.1.1.8]
D	DYST_01601;	K22549	lhpC;	D-hydroxyproline	dehydrogenase	subunit	alpha	[EC:1.5.99.-]
D	DYST_01599;	K21061	lhpB;	D-hydroxyproline	dehydrogenase	subunit	beta	[EC:1.5.99.-]
D	DYST_01602;	K21062	lhpC;	1-pyrroline-4-hydroxy-2-carboxylate	deaminase	[EC:3.5.4.22]
D	DYST_01603;	K13877	aldH;	2,5-dioxopentanoate	dehydrogenase	[EC:1.2.1.26]
D	DYST_01726;	K00285	dadA;	D-amino-acid	dehydrogenase	[EC:1.4.5.1]
D	DYST_01727;	K00285	dadA;	D-amino-acid	dehydrogenase	[EC:1.4.5.1]
C	480	Glutathione	metabolism	[PATH:ko00480]
D	DYST_04173;	K00681	ggt;	gamma-glutamyltranspeptidase	/	glutathione	hydrolase	[EC:2.3.2.2	3.4.19.13]
D	DYST_02846;	K07160	pxpA;	5-oxoprolinase	(ATP-hydrolysing)	subunit	A	[EC:3.5.2.9]
D	DYST_02845;	K23124	pxpC;	5-oxoprolinase	(ATP-hydrolysing)	subunit	C	[EC:3.5.2.9]
D	DYST_03522;	K01919	gshA;	glutamate--cysteine	ligase	[EC:6.3.2.2]
D	DYST_02038;	K01920	gshB;	glutathione	synthase	[EC:6.3.2.3]
D	DYST_02060;	K01255	CARP,	pepA;	leucyl	aminopeptidase	[EC:3.4.11.1]
D	DYST_02375;	K01255	CARP,	pepA;	leucyl	aminopeptidase	[EC:3.4.11.1]
D	DYST_02942;	K01256	pepN;	aminopeptidase	N	[EC:3.4.11.2]
D	DYST_04049;	K01256	pepN;	aminopeptidase	N	[EC:3.4.11.2]
D	DYST_00036;	K00799	GST,	gst;	glutathione	S-transferase	[EC:2.5.1.18]
D	DYST_01328;	K00799	GST,	gst;	glutathione	S-transferase	[EC:2.5.1.18]
D	DYST_01586;	K00799	GST,	gst;	glutathione	S-transferase	[EC:2.5.1.18]
D	DYST_01590;	K00799	GST,	gst;	glutathione	S-transferase	[EC:2.5.1.18]
D	DYST_01750;	K00799	GST,	gst;	glutathione	S-transferase	[EC:2.5.1.18]
D	DYST_02487;	K00799	GST,	gst;	glutathione	S-transferase	[EC:2.5.1.18]
D	DYST_02588;	K00799	GST,	gst;	glutathione	S-transferase	[EC:2.5.1.18]
D	DYST_02610;	K00799	GST,	gst;	glutathione	S-transferase	[EC:2.5.1.18]
D	DYST_02651;	K00799	GST,	gst;	glutathione	S-transferase	[EC:2.5.1.18]
D	DYST_02826;	K00799	GST,	gst;	glutathione	S-transferase	[EC:2.5.1.18]
D	DYST_03063;	K00799	GST,	gst;	glutathione	S-transferase	[EC:2.5.1.18]
D	DYST_03845;	K00799	GST,	gst;	glutathione	S-transferase	[EC:2.5.1.18]
D	DYST_01725;	K00383	GSR,	gor;	glutathione	reductase	(NADPH)	[EC:1.8.1.7]
D	DYST_03364;	K00031	IDH1,	IDH2,	icd;	isocitrate	dehydrogenase	[EC:1.1.1.42]
D	DYST_00304;	K00033	PGD,	gnd,	gntZ;	6-phosphogluconate	dehydrogenase	[EC:1.1.1.44	1.1.1.343]
D	DYST_02809;	K00033	PGD,	gnd,	gntZ;	6-phosphogluconate	dehydrogenase	[EC:1.1.1.44	1.1.1.343]
D	DYST_00298;	K00036	G6PD,	zwf;	glucose-6-phosphate	1-dehydrogenase	[EC:1.1.1.49	1.1.1.363]
D	DYST_03176;	K00036	G6PD,	zwf;	glucose-6-phosphate	1-dehydrogenase	[EC:1.1.1.49	1.1.1.363]
D	DYST_04555;	K00432	gpx,	btuE,	bsaA;	glutathione	peroxidase	[EC:1.11.1.9]
D	DYST_00017;	K24136	pgdX;	glutathione-dependent	peroxiredoxin	[EC:1.11.1.27]
D	DYST_02991;	K00797	speE,	SRM,	SPE3;	spermidine	synthase	[EC:2.5.1.16]
B
B	9107	Glycan	biosynthesis	and	metabolism
C	510	N-Glycan	biosynthesis	[PATH:ko00510]
D	DYST_01989;	K00721	DPM1;	dolichol-phosphate	mannosyltransferase	[EC:2.4.1.83]
C	513	Various	types	of	N-glycan	biosynthesis	[PATH:ko00513]
D	DYST_00560;	K12373	HEXA_B;	hexosaminidase	[EC:3.2.1.52]
D	DYST_02840;	K12373	HEXA_B;	hexosaminidase	[EC:3.2.1.52]
C	512	Mucin	type	O-glycan	biosynthesis	[PATH:ko00512]
C	515	Mannose	type	O-glycan	biosynthesis	[PATH:ko00515]
C	514	Other	types	of	O-glycan	biosynthesis	[PATH:ko00514]
D	DYST_04389;	K09667	OGT;	protein	O-GlcNAc	transferase	[EC:2.4.1.255]
C	532	Glycosaminoglycan	biosynthesis	-	chondroitin	sulfate	/	dermatan	sulfate	[PATH:ko00532]
C	534	Glycosaminoglycan	biosynthesis	-	heparan	sulfate	/	heparin	[PATH:ko00534]
C	533	Glycosaminoglycan	biosynthesis	-	keratan	sulfate	[PATH:ko00533]
C	531	Glycosaminoglycan	degradation	[PATH:ko00531]
D	DYST_01513;	K01195	uidA,	GUSB;	beta-glucuronidase	[EC:3.2.1.31]
D	DYST_00859;	K01207	nagZ;	beta-N-acetylhexosaminidase	[EC:3.2.1.52]
D	DYST_03022;	K01217	IDUA;	L-iduronidase	[EC:3.2.1.76]
D	DYST_02839;	K10532	HGSNAT;	heparan-alpha-glucosaminide	N-acetyltransferase	[EC:2.3.1.78]
D	DYST_00364;	K01205	NAGLU;	alpha-N-acetylglucosaminidase	[EC:3.2.1.50]
D	DYST_00560;	K12373	HEXA_B;	hexosaminidase	[EC:3.2.1.52]
D	DYST_02840;	K12373	HEXA_B;	hexosaminidase	[EC:3.2.1.52]
C	563	Glycosylphosphatidylinositol	(GPI)-anchor	biosynthesis	[PATH:ko00563]
C	601	Glycosphingolipid	biosynthesis	-	lacto	and	neolacto	series	[PATH:ko00601]
C	603	Glycosphingolipid	biosynthesis	-	globo	and	isoglobo	series	[PATH:ko00603]
D	DYST_00574;	K07407	E3.2.1.22B,	galA,	rafA;	alpha-galactosidase	[EC:3.2.1.22]
D	DYST_00560;	K12373	HEXA_B;	hexosaminidase	[EC:3.2.1.52]
D	DYST_02840;	K12373	HEXA_B;	hexosaminidase	[EC:3.2.1.52]
C	604	Glycosphingolipid	biosynthesis	-	ganglio	series	[PATH:ko00604]
D	DYST_00560;	K12373	HEXA_B;	hexosaminidase	[EC:3.2.1.52]
D	DYST_02840;	K12373	HEXA_B;	hexosaminidase	[EC:3.2.1.52]
C	540	Lipopolysaccharide	biosynthesis	[PATH:ko00540]
D	DYST_04478;	K00677	lpxA;	UDP-N-acetylglucosamine	acyltransferase	[EC:2.3.1.129]
D	DYST_03901;	K02535	lpxC;	UDP-3-O-[3-hydroxymyristoyl]	N-acetylglucosamine	deacetylase	[EC:3.5.1.108]
D	DYST_04480;	K02536	lpxD;	UDP-3-O-[3-hydroxymyristoyl]	glucosamine	N-acyltransferase	[EC:2.3.1.191]
D	DYST_04594;	K03269	lpxH;	UDP-2,3-diacylglucosamine	hydrolase	[EC:3.6.1.54]
D	DYST_04477;	K00748	lpxB;	lipid-A-disaccharide	synthase	[EC:2.4.1.182]
D	DYST_04871;	K00912	lpxK;	tetraacyldisaccharide	4'-kinase	[EC:2.7.1.130]
D	DYST_04137;	K06041	kdsD,	kpsF;	arabinose-5-phosphate	isomerase	[EC:5.3.1.13]
D	DYST_01033;	K01627	kdsA;	2-dehydro-3-deoxyphosphooctonate	aldolase	(KDO	8-P	synthase)	[EC:2.5.1.55]
D	DYST_04136;	K03270	kdsC;	3-deoxy-D-manno-octulosonate	8-phosphate	phosphatase	(KDO	8-P	phosphatase)	[EC:3.1.3.45]
D	DYST_00423;	K00979	kdsB;	3-deoxy-manno-octulosonate	cytidylyltransferase	(CMP-KDO	synthetase)	[EC:2.7.7.38]
D	DYST_02435;	K02527	kdtA,	waaA;	3-deoxy-D-manno-octulosonic-acid	transferase	[EC:2.4.99.12	2.4.99.13	2.4.99.14	2.4.99.15]
D	DYST_02436;	K02517	lpxL,	htrB;	Kdo2-lipid	IVA	lauroyltransferase/acyltransferase	[EC:2.3.1.241	2.3.1.-]
D	DYST_03201;	K02517	lpxL,	htrB;	Kdo2-lipid	IVA	lauroyltransferase/acyltransferase	[EC:2.3.1.241	2.3.1.-]
D	DYST_04607;	K12979	lpxO;	beta-hydroxylase	[EC:1.14.11.-]
D	DYST_03213;	K07264	arnT,	pmrK;	4-amino-4-deoxy-L-arabinose	transferase	[EC:2.4.2.43]
D	DYST_04875;	K11211	kdkA;	3-deoxy-D-manno-octulosonic	acid	kinase	[EC:2.7.1.166]
D	DYST_01994;	K19353	eptC;	heptose-I-phosphate	ethanolaminephosphotransferase	[EC:2.7.8.-]
D	DYST_01588;	K03280	waaK,	rfaK;	UDP-N-acetylglucosamine:(glucosyl)LPS	alpha-1,2-N-acetylglucosaminyltransferase	[EC:2.4.1.56]
C	542	O-Antigen	repeat	unit	biosynthesis	[PATH:ko00542]
C	541	O-Antigen	nucleotide	sugar	biosynthesis	[PATH:ko00541]
D	DYST_00121;	K00963	UGP2,	galU,	galF;	UTP--glucose-1-phosphate	uridylyltransferase	[EC:2.7.7.9]
D	DYST_00945;	K01784	galE,	GALE;	UDP-glucose	4-epimerase	[EC:5.1.3.2]
D	DYST_02218;	K01784	galE,	GALE;	UDP-glucose	4-epimerase	[EC:5.1.3.2]
D	DYST_03208;	K01784	galE,	GALE;	UDP-glucose	4-epimerase	[EC:5.1.3.2]
D	DYST_00880;	K00012	UGDH,	ugd;	UDPglucose	6-dehydrogenase	[EC:1.1.1.22]
D	DYST_02127;	K00012	UGDH,	ugd;	UDPglucose	6-dehydrogenase	[EC:1.1.1.22]
D	DYST_00918;	K08679	GAE,	cap1J;	UDP-glucuronate	4-epimerase	[EC:5.1.3.6]
D	DYST_01933;	K08679	GAE,	cap1J;	UDP-glucuronate	4-epimerase	[EC:5.1.3.6]
D	DYST_02139;	K00973	rfbA,	rmlA,	rffH;	glucose-1-phosphate	thymidylyltransferase	[EC:2.7.7.24]
D	DYST_02138;	K01710	rfbB,	rmlB,	rffG;	dTDP-glucose	4,6-dehydratase	[EC:4.2.1.46]
D	DYST_02585;	K01710	rfbB,	rmlB,	rffG;	dTDP-glucose	4,6-dehydratase	[EC:4.2.1.46]
D	DYST_02140;	K01790	rfbC,	rmlC;	dTDP-4-dehydrorhamnose	3,5-epimerase	[EC:5.1.3.13]
D	DYST_02141;	K00067	rfbD,	rmlD;	dTDP-4-dehydrorhamnose	reductase	[EC:1.1.1.133]
D	DYST_02511;	K00523	ascD,	ddhD,	rfbI;	CDP-4-dehydro-6-deoxyglucose	reductase,	E3	[EC:1.17.1.1]
D	DYST_02142;	K16011	algA,	xanB,	rfbA,	wbpW,	pslB;	mannose-1-phosphate	guanylyltransferase	/	mannose-6-phosphate	isomerase	[EC:2.7.7.13	5.3.1.8]
D	DYST_02121;	K01840	manB;	phosphomannomutase	[EC:5.4.2.8]
D	DYST_03256;	K04042	glmU;	bifunctional	UDP-N-acetylglucosamine	pyrophosphorylase	/	glucosamine-1-phosphate	N-acetyltransferase	[EC:2.7.7.23	2.3.1.157]
D	DYST_01988;	K01791	wecB;	UDP-N-acetylglucosamine	2-epimerase	(non-hydrolysing)	[EC:5.1.3.14]
D	DYST_00917;	K22926	tviB,	vipA;	UDP-N-acetylglucosamine	6-dehydrogenase	[EC:1.1.1.136]
D	DYST_00643;	K13017	wbpE,	wlbC;	UDP-2-acetamido-2-deoxy-ribo-hexuluronate	aminotransferase	[EC:2.6.1.98]
C	550	Peptidoglycan	biosynthesis	[PATH:ko00550]
D	DYST_04139;	K00790	murA;	UDP-N-acetylglucosamine	1-carboxyvinyltransferase	[EC:2.5.1.7]
D	DYST_04794;	K00075	murB;	UDP-N-acetylmuramate	dehydrogenase	[EC:1.3.1.98]
D	DYST_03896;	K01924	murC;	UDP-N-acetylmuramate--alanine	ligase	[EC:6.3.2.8]
D	DYST_04094;	K01925	murD;	UDP-N-acetylmuramoylalanine--D-glutamate	ligase	[EC:6.3.2.9]
D	DYST_03891;	K01928	murE;	UDP-N-acetylmuramoyl-L-alanyl-D-glutamate--2,6-diaminopimelate	ligase	[EC:6.3.2.13]
D	DYST_03897;	K01921	ddl;	D-alanine-D-alanine	ligase	[EC:6.3.2.4]
D	DYST_03892;	K01929	murF;	UDP-N-acetylmuramoyl-tripeptide--D-alanyl-D-alanine	ligase	[EC:6.3.2.10]
D	DYST_04485;	K00806	uppS;	undecaprenyl	diphosphate	synthase	[EC:2.5.1.31]
D	DYST_03027;	K06153	bacA;	undecaprenyl-diphosphatase	[EC:3.6.1.27]
D	DYST_01448;	K19302	bcrC;	undecaprenyl-diphosphatase	[EC:3.6.1.27]
D	DYST_03893;	K01000	mraY;	phospho-N-acetylmuramoyl-pentapeptide-transferase	[EC:2.7.8.13]
D	DYST_03895;	K02563	murG;	UDP-N-acetylglucosamine--N-acetylmuramyl-(pentapeptide)	pyrophosphoryl-undecaprenol	N-acetylglucosamine	transferase	[EC:2.4.1.227]
D	DYST_02098;	K03814	mtgA;	monofunctional	glycosyltransferase	[EC:2.4.1.129]
D	DYST_03787;	K05366	mrcA;	penicillin-binding	protein	1A	[EC:2.4.1.129	3.4.16.4]
D	DYST_04110;	K05365	mrcB;	penicillin-binding	protein	1B	[EC:2.4.1.129	3.4.16.4]
D	DYST_00123;	K05367	pbpC;	penicillin-binding	protein	1C	[EC:2.4.1.129]
D	DYST_02388;	K05515	mrdA;	penicillin-binding	protein	2	[EC:3.4.16.4]
D	DYST_03890;	K03587	ftsI;	cell	division	protein	FtsI	(penicillin-binding	protein	3)	[EC:3.4.16.4]
D	DYST_02384;	K07258	dacC,	dacA,	dacD;	serine-type	D-Ala-D-Ala	carboxypeptidase	(penicillin-binding	protein	5/6)	[EC:3.4.16.4]
D	DYST_03849;	K07258	dacC,	dacA,	dacD;	serine-type	D-Ala-D-Ala	carboxypeptidase	(penicillin-binding	protein	5/6)	[EC:3.4.16.4]
D	DYST_04556;	K07259	dacB;	serine-type	D-Ala-D-Ala	carboxypeptidase/endopeptidase	(penicillin-binding	protein	4)	[EC:3.4.16.4	3.4.21.-]
C	511	Other	glycan	degradation	[PATH:ko00511]
D	DYST_00560;	K12373	HEXA_B;	hexosaminidase	[EC:3.2.1.52]
D	DYST_02840;	K12373	HEXA_B;	hexosaminidase	[EC:3.2.1.52]
D	DYST_03944;	K01192	E3.2.1.25,	MANBA,	manB;	beta-mannosidase	[EC:3.2.1.25]
D	DYST_00351;	K01206	FUCA;	alpha-L-fucosidase	[EC:3.2.1.51]
D	DYST_00677;	K01206	FUCA;	alpha-L-fucosidase	[EC:3.2.1.51]
D	DYST_00854;	K01444	AGA,	aspG;	N4-(beta-N-acetylglucosaminyl)-L-asparaginase	[EC:3.5.1.26]
D	DYST_02658;	K01201	GBA,	srfJ;	glucosylceramidase	[EC:3.2.1.45]
C	571	Lipoarabinomannan	(LAM)	biosynthesis	[PATH:ko00571]
C	572	Arabinogalactan	biosynthesis	-	Mycobacterium	[PATH:ko00572]
B
B	9108	Metabolism	of	cofactors	and	vitamins
C	730	Thiamine	metabolism	[PATH:ko00730]
D	DYST_02430;	K03147	thiC;	phosphomethylpyrimidine	synthase	[EC:4.1.99.17]
D	DYST_04608;	K00941	thiD;	hydroxymethylpyrimidine/phosphomethylpyrimidine	kinase	[EC:2.7.1.49	2.7.4.7]
D	DYST_00495;	K01662	dxs;	1-deoxy-D-xylulose-5-phosphate	synthase	[EC:2.2.1.7]
D	DYST_04062;	K01662	dxs;	1-deoxy-D-xylulose-5-phosphate	synthase	[EC:2.2.1.7]
D	DYST_03817;	K03149	thiG;	thiazole	synthase	[EC:2.8.1.10]
D	DYST_02403;	K00788	thiE;	thiamine-phosphate	pyrophosphorylase	[EC:2.5.1.3]
D	DYST_04233;	K00946	thiL;	thiamine-monophosphate	kinase	[EC:2.7.4.16]
D	DYST_02325;	K06949	rsgA,	engC;	ribosome	biogenesis	GTPase	/	thiamine	phosphate	phosphatase	[EC:3.6.1.-	3.1.3.100]
D	DYST_03583;	K06949	rsgA,	engC;	ribosome	biogenesis	GTPase	/	thiamine	phosphate	phosphatase	[EC:3.6.1.-	3.1.3.100]
D	DYST_02727;	K01077	E3.1.3.1,	phoA,	phoB;	alkaline	phosphatase	[EC:3.1.3.1]
D	DYST_02414;	K00939	adk,	AK;	adenylate	kinase	[EC:2.7.4.3]
C	740	Riboflavin	metabolism	[PATH:ko00740]
D	DYST_04228;	K14652	ribBA;	3,4-dihydroxy	2-butanone	4-phosphate	synthase	/	GTP	cyclohydrolase	II	[EC:4.1.99.12	3.5.4.25]
D	DYST_04222;	K11752	ribD;	diaminohydroxyphosphoribosylaminopyrimidine	deaminase	/	5-amino-6-(5-phosphoribosylamino)uracil	reductase	[EC:3.5.4.26	1.1.1.193]
D	DYST_02374;	K20862	yigB;	FMN	hydrolase	/	5-amino-6-(5-phospho-D-ribitylamino)uracil	phosphatase	[EC:3.1.3.102	3.1.3.104]
D	DYST_04230;	K00794	ribH,	RIB4;	6,7-dimethyl-8-ribityllumazine	synthase	[EC:2.5.1.78]
D	DYST_04227;	K00793	ribE,	RIB5;	riboflavin	synthase	[EC:2.5.1.9]
D	DYST_04644;	K11753	ribF;	riboflavin	kinase	/	FMN	adenylyltransferase	[EC:2.7.1.26	2.7.7.2]
D	DYST_00534;	K09474	phoN;	acid	phosphatase	(class	A)	[EC:3.1.3.2]
D	DYST_03456;	K09474	phoN;	acid	phosphatase	(class	A)	[EC:3.1.3.2]
D	DYST_01168;	K01513	ENPP1_3,	CD203;	ectonucleotide	pyrophosphatase/phosphodiesterase	family	member	2021-01-03	[EC:3.1.4.1	3.6.1.9]
D	DYST_00975;	K04719	bluB;	5,6-dimethylbenzimidazole	synthase	[EC:1.13.11.79]
D	DYST_04351;	K01515	nudF;	ADP-ribose	pyrophosphatase	[EC:3.6.1.13	3.6.1.-]
C	750	Vitamin	B6	metabolism	[PATH:ko00750]
D	DYST_04278;	K00275	pdxH,	PNPO;	pyridoxamine	5'-phosphate	oxidase	[EC:1.4.3.5]
D	DYST_02745;	K05275	E1.1.1.65;	pyridoxine	4-dehydrogenase	[EC:1.1.1.65]
D	DYST_00420;	K00831	serC,	PSAT1;	phosphoserine	aminotransferase	[EC:2.6.1.52]
D	DYST_03908;	K00097	pdxA;	4-hydroxythreonine-4-phosphate	dehydrogenase	[EC:1.1.1.262]
D	DYST_03082;	K03474	pdxJ;	pyridoxine	5-phosphate	synthase	[EC:2.6.99.2]
D	DYST_02875;	K01733	thrC;	threonine	synthase	[EC:4.2.3.1]
C	760	Nicotinate	and	nicotinamide	metabolism	[PATH:ko00760]
D	DYST_01956;	K00767	nadC,	QPRT;	nicotinate-nucleotide	pyrophosphorylase	(carboxylating)	[EC:2.4.2.19]
D	DYST_04551;	K00763	pncB,	NAPRT1;	nicotinate	phosphoribosyltransferase	[EC:6.3.4.21]
D	DYST_01467;	K01081	E3.1.3.5;	5'-nucleotidase	[EC:3.1.3.5]
D	DYST_01025;	K03787	surE;	5'-nucleotidase	[EC:3.1.3.5]
D	DYST_01765;	K00969	nadD;	nicotinate-nucleotide	adenylyltransferase	[EC:2.7.7.18]
D	DYST_01168;	K01513	ENPP1_3,	CD203;	ectonucleotide	pyrophosphatase/phosphodiesterase	family	member	2021-01-03	[EC:3.1.4.1	3.6.1.9]
D	DYST_02021;	K04765	mazG;	nucleoside	triphosphate	diphosphatase	[EC:3.6.1.9]
D	DYST_03227;	K03426	E3.6.1.22,	NUDT12,	nudC;	NAD+	diphosphatase	[EC:3.6.1.22]
D	DYST_03994;	K01916	nadE;	NAD+	synthase	[EC:6.3.1.5]
D	DYST_04584;	K03743	pncC;	nicotinamide-nucleotide	amidase	[EC:3.5.1.42]
D	DYST_03783;	K01239	iunH;	purine	nucleosidase	[EC:3.2.2.1]
D	DYST_02268;	K08281	pncA;	nicotinamidase/pyrazinamidase	[EC:3.5.1.19	3.5.1.-]
D	DYST_00459;	K12410	npdA;	NAD-dependent	deacetylase	[EC:2.3.1.286]
D	DYST_01468;	K00858	ppnK,	NADK;	NAD+	kinase	[EC:2.7.1.23]
D	DYST_04357;	K00324	pntA;	H+-translocating	NAD(P)	transhydrogenase	subunit	alpha	[EC:1.6.1.2	7.1.1.1]
D	DYST_04363;	K00325	pntB;	H+-translocating	NAD(P)	transhydrogenase	subunit	beta	[EC:1.6.1.2	7.1.1.1]
C	770	Pantothenate	and	CoA	biosynthesis	[PATH:ko00770]
D	DYST_00828;	K01652	E2.2.1.6L,	ilvB,	ilvG,	ilvI;	acetolactate	synthase	I/II/III	large	subunit	[EC:2.2.1.6]
D	DYST_02897;	K01652	E2.2.1.6L,	ilvB,	ilvG,	ilvI;	acetolactate	synthase	I/II/III	large	subunit	[EC:2.2.1.6]
D	DYST_02898;	K01653	E2.2.1.6S,	ilvH,	ilvN;	acetolactate	synthase	I/III	small	subunit	[EC:2.2.1.6]
D	DYST_02896;	K00053	ilvC;	ketol-acid	reductoisomerase	[EC:1.1.1.86]
D	DYST_02895;	K01687	ilvD;	dihydroxy-acid	dehydratase	[EC:4.2.1.9]
D	DYST_04618;	K00606	panB;	3-methyl-2-oxobutanoate	hydroxymethyltransferase	[EC:2.1.2.11]
D	DYST_01783;	K00077	panE,	apbA;	2-dehydropantoate	2-reductase	[EC:1.1.1.169]
D	DYST_03630;	K00077	panE,	apbA;	2-dehydropantoate	2-reductase	[EC:1.1.1.169]
D	DYST_04619;	K01918	panC;	pantoate--beta-alanine	ligase	[EC:6.3.2.1]
D	DYST_02191;	K03525	coaX;	type	III	pantothenate	kinase	[EC:2.7.1.33]
D	DYST_02976;	K13038	coaBC,	dfp;	phosphopantothenoylcysteine	decarboxylase	/	phosphopantothenate---cysteine	ligase	[EC:4.1.1.36	6.3.2.5]
D	DYST_01168;	K01513	ENPP1_3,	CD203;	ectonucleotide	pyrophosphatase/phosphodiesterase	family	member	2021-01-03	[EC:3.1.4.1	3.6.1.9]
D	DYST_02021;	K04765	mazG;	nucleoside	triphosphate	diphosphatase	[EC:3.6.1.9]
D	DYST_04170;	K00954	E2.7.7.3A,	coaD,	kdtB;	pantetheine-phosphate	adenylyltransferase	[EC:2.7.7.3]
D	DYST_01995;	K00859	coaE;	dephospho-CoA	kinase	[EC:2.7.1.24]
D	DYST_03081;	K06133	LYS5,	acpT;	4'-phosphopantetheinyl	transferase	[EC:2.7.8.-]
D	DYST_03353;	K08682	acpH;	acyl	carrier	protein	phosphodiesterase	[EC:3.1.4.14]
D	DYST_02890;	K00826	E2.6.1.42,	ilvE;	branched-chain	amino	acid	aminotransferase	[EC:2.6.1.42]
D	DYST_03827;	K00826	E2.6.1.42,	ilvE;	branched-chain	amino	acid	aminotransferase	[EC:2.6.1.42]
D	DYST_04620;	K01579	panD;	aspartate	1-decarboxylase	[EC:4.1.1.11]
D	DYST_00669;	K00128	ALDH;	aldehyde	dehydrogenase	(NAD+)	[EC:1.2.1.3]
D	DYST_01095;	K00128	ALDH;	aldehyde	dehydrogenase	(NAD+)	[EC:1.2.1.3]
C	780	Biotin	metabolism	[PATH:ko00780]
D	DYST_02934;	K02169	bioC;	malonyl-CoA	O-methyltransferase	[EC:2.1.1.197]
D	DYST_04898;	K09458	fabF,	OXSM,	CEM1;	3-oxoacyl-[acyl-carrier-protein]	synthase	II	[EC:2.3.1.179]
D	DYST_01719;	K00059	fabG,	OAR1;	3-oxoacyl-[acyl-carrier	protein]	reductase	[EC:1.1.1.100]
D	DYST_02978;	K00059	fabG,	OAR1;	3-oxoacyl-[acyl-carrier	protein]	reductase	[EC:1.1.1.100]
D	DYST_03267;	K00059	fabG,	OAR1;	3-oxoacyl-[acyl-carrier	protein]	reductase	[EC:1.1.1.100]
D	DYST_04121;	K00059	fabG,	OAR1;	3-oxoacyl-[acyl-carrier	protein]	reductase	[EC:1.1.1.100]
D	DYST_04572;	K00059	fabG,	OAR1;	3-oxoacyl-[acyl-carrier	protein]	reductase	[EC:1.1.1.100]
D	DYST_04896;	K00059	fabG,	OAR1;	3-oxoacyl-[acyl-carrier	protein]	reductase	[EC:1.1.1.100]
D	DYST_04479;	K02372	fabZ;	3-hydroxyacyl-[acyl-carrier-protein]	dehydratase	[EC:4.2.1.59]
D	DYST_02933;	K02170	bioH;	pimeloyl-[acyl-carrier	protein]	methyl	ester	esterase	[EC:3.1.1.85]
D	DYST_02931;	K00652	bioF;	8-amino-7-oxononanoate	synthase	[EC:2.3.1.47]
D	DYST_02028;	K00833	bioA;	adenosylmethionine---8-amino-7-oxononanoate	aminotransferase	[EC:2.6.1.62]
D	DYST_03503;	K01935	bioD;	dethiobiotin	synthetase	[EC:6.3.3.3]
D	DYST_02930;	K01012	bioB;	biotin	synthase	[EC:2.8.1.6]
D	DYST_02192;	K03524	birA;	BirA	family	transcriptional	regulator,	biotin	operon	repressor	/	biotin---[acetyl-CoA-carboxylase]	ligase	[EC:6.3.4.15]
C	785	Lipoic	acid	metabolism	[PATH:ko00785]
D	DYST_02382;	K03801	lipB;	lipoyl(octanoyl)	transferase	[EC:2.3.1.181]
D	DYST_02381;	K03644	lipA,	LIAS,	LIP1,	LIP5;	lipoyl	synthase	[EC:2.8.1.8]
C	790	Folate	biosynthesis	[PATH:ko00790]
D	DYST_02523;	K01495	GCH1,	folE;	GTP	cyclohydrolase	IA	[EC:3.5.4.16]
D	DYST_01690;	K09007	folE2;	GTP	cyclohydrolase	IB	[EC:3.5.4.16]
D	DYST_02727;	K01077	E3.1.3.1,	phoA,	phoB;	alkaline	phosphatase	[EC:3.1.3.1]
D	DYST_03484;	K01633	folB;	7,8-dihydroneopterin	aldolase/epimerase/oxygenase	[EC:4.1.2.25	5.1.99.8	1.13.11.81]
D	DYST_03485;	K00950	folK;	2-amino-4-hydroxy-6-hydroxymethyldihydropteridine	diphosphokinase	[EC:2.7.6.3]
D	DYST_04617;	K00950	folK;	2-amino-4-hydroxy-6-hydroxymethyldihydropteridine	diphosphokinase	[EC:2.7.6.3]
D	DYST_00270;	K00796	folP;	dihydropteroate	synthase	[EC:2.5.1.15]
D	DYST_01997;	K00287	DHFR,	folA;	dihydrofolate	reductase	[EC:1.5.1.3]
D	DYST_01108;	K11754	folC;	dihydrofolate	synthase	/	folylpolyglutamate	synthase	[EC:6.3.2.12	6.3.2.17]
D	DYST_04228;	K14652	ribBA;	3,4-dihydroxy	2-butanone	4-phosphate	synthase	/	GTP	cyclohydrolase	II	[EC:4.1.99.12	3.5.4.25]
D	DYST_04899;	K01665	pabB;	para-aminobenzoate	synthetase	component	I	[EC:2.6.1.85]
D	DYST_04900;	K02619	pabC;	4-amino-4-deoxychorismate	lyase	[EC:4.1.3.38]
D	DYST_03244;	K01737	queD,	ptpS,	PTS;	6-pyruvoyltetrahydropterin/6-carboxytetrahydropterin	synthase	[EC:4.2.3.12	4.1.2.50]
D	DYST_00220;	K01724	PCBD,	phhB;	4a-hydroxytetrahydrobiopterin	dehydratase	[EC:4.2.1.96]
D	DYST_03055;	K00500	phhA,	PAH;	phenylalanine-4-hydroxylase	[EC:1.14.16.1]
D	DYST_04032;	K10026	queE;	7-carboxy-7-deazaguanine	synthase	[EC:4.3.99.3]
D	DYST_04033;	K06920	queC;	7-cyano-7-deazaguanine	synthase	[EC:6.3.4.20]
D	DYST_02708;	K06879	queF;	7-cyano-7-deazaguanine	reductase	[EC:1.7.1.13]
D	DYST_00632;	K17488	mptA;	GTP	cyclohydrolase	IV	[EC:3.5.4.39]
D	DYST_01275;	K03639	moaA,	CNX2;	GTP	3',8-cyclase	[EC:4.1.99.22]
D	DYST_01273;	K03637	moaC,	CNX3;	cyclic	pyranopterin	monophosphate	synthase	[EC:4.6.1.17]
D	DYST_01274;	K03637	moaC,	CNX3;	cyclic	pyranopterin	monophosphate	synthase	[EC:4.6.1.17]
D	DYST_01276;	K03750	moeA;	molybdopterin	molybdotransferase	[EC:2.10.1.1]
D	DYST_01281;	K03750	moeA;	molybdopterin	molybdotransferase	[EC:2.10.1.1]
D	DYST_00741;	K07141	mocA;	molybdenum	cofactor	cytidylyltransferase	[EC:2.7.7.76]
C	670	One	carbon	pool	by	folate	[PATH:ko00670]
D	DYST_01997;	K00287	DHFR,	folA;	dihydrofolate	reductase	[EC:1.5.1.3]
D	DYST_00451;	K01491	folD;	methylenetetrahydrofolate	dehydrogenase	(NADP+)	/	methenyltetrahydrofolate	cyclohydrolase	[EC:1.5.1.5	3.5.4.9]
D	DYST_04219;	K00600	glyA,	SHMT;	glycine	hydroxymethyltransferase	[EC:2.1.2.1]
D	DYST_04141;	K11175	purN;	phosphoribosylglycinamide	formyltransferase	1	[EC:2.1.2.2]
D	DYST_02483;	K00602	purH;	phosphoribosylaminoimidazolecarboxamide	formyltransferase	/	IMP	cyclohydrolase	[EC:2.1.2.3	3.5.4.10]
D	DYST_03215;	K00604	MTFMT,	fmt;	methionyl-tRNA	formyltransferase	[EC:2.1.2.9]
D	DYST_02108;	K00605	gcvT,	AMT;	aminomethyltransferase	[EC:2.1.2.10]
D	DYST_01479;	K00548	metH,	MTR;	5-methyltetrahydrofolate--homocysteine	methyltransferase	[EC:2.1.1.13]
D	DYST_01478;	K24042	yitJ;	methionine	synthase	/	methylenetetrahydrofolate	reductase	(NADH)	[EC:2.1.1.13	1.5.1.54]
D	DYST_01998;	K00560	thyA,	TYMS;	thymidylate	synthase	[EC:2.1.1.45]
D	DYST_01704;	K01433	purU;	formyltetrahydrofolate	deformylase	[EC:3.5.1.10]
D	DYST_03829;	K00297	metF,	MTHFR;	methylenetetrahydrofolate	reductase	(NADH)	[EC:1.5.1.54]
D	DYST_03693;	K01934	MTHFS;	5-formyltetrahydrofolate	cyclo-ligase	[EC:6.3.3.2]
C	830	Retinol	metabolism	[PATH:ko00830]
D	DYST_01403;	K00121	frmA,	ADH5,	adhC;	S-(hydroxymethyl)glutathione	dehydrogenase	/	alcohol	dehydrogenase	[EC:1.1.1.284	1.1.1.1]
D	DYST_04774;	K13953	adhP;	alcohol	dehydrogenase,	propanol-preferring	[EC:1.1.1.1]
D	DYST_03159;	K17690	CYP3A5;	cytochrome	P450	family	3	subfamily	A5	[EC:1.14.14.1]
C	860	Porphyrin	metabolism	[PATH:ko00860]
D	DYST_01200;	K01885	EARS,	gltX;	glutamyl-tRNA	synthetase	[EC:6.1.1.17]
D	DYST_04391;	K02492	hemA;	glutamyl-tRNA	reductase	[EC:1.2.1.70]
D	DYST_02404;	K01845	hemL;	glutamate-1-semialdehyde	2,1-aminomutase	[EC:5.4.3.8]
D	DYST_03435;	K01698	hemB,	ALAD;	porphobilinogen	synthase	[EC:4.2.1.24]
D	DYST_03141;	K01749	hemC,	HMBS;	hydroxymethylbilane	synthase	[EC:2.5.1.61]
D	DYST_02507;	K01719	hemD,	UROS;	uroporphyrinogen-III	synthase	[EC:4.2.1.75]
D	DYST_04270;	K01599	hemE,	UROD;	uroporphyrinogen	decarboxylase	[EC:4.1.1.37]
D	DYST_03272;	K00228	CPOX,	hemF;	coproporphyrinogen	III	oxidase	[EC:1.3.3.3]
D	DYST_02166;	K02495	hemN,	hemZ;	oxygen-independent	coproporphyrinogen	III	oxidase	[EC:1.3.98.3]
D	DYST_01934;	K08973	hemJ;	protoporphyrinogen	IX	oxidase	[EC:1.3.99.-]
D	DYST_02556;	K01772	hemH,	FECH;	protoporphyrin/coproporphyrin	ferrochelatase	[EC:4.99.1.1	4.99.1.9]
D	DYST_00033;	K02302	cysG;	uroporphyrin-III	C-methyltransferase	/	precorrin-2	dehydrogenase	/	sirohydrochlorin	ferrochelatase	[EC:2.1.1.107	1.3.1.76	4.99.1.4]
D	DYST_03468;	K02257	COX10,	ctaB,	cyoE;	heme	o	synthase	[EC:2.5.1.141]
D	DYST_03467;	K02259	COX15,	ctaA;	heme	a	synthase	[EC:1.17.99.9]
D	DYST_04007;	K02224	cobB-cbiA;	cobyrinic	acid	a,c-diamide	synthase	[EC:6.3.5.9	6.3.5.11]
D	DYST_03913;	K00798	MMAB,	pduO;	cob(I)alamin	adenosyltransferase	[EC:2.5.1.17]
D	DYST_04006;	K19221	cobA,	btuR;	cob(I)alamin	adenosyltransferase	[EC:2.5.1.17]
D	DYST_04011;	K02232	cobQ,	cbiP;	adenosylcobyric	acid	synthase	[EC:6.3.5.10]
D	DYST_04009;	K02227	cbiB,	cobD;	adenosylcobinamide-phosphate	synthase	[EC:6.3.1.10]
D	DYST_04010;	K02225	cobC1,	cobC;	cobalamin	biosynthesis	protein	CobC
D	DYST_04012;	K02231	cobP,	cobU;	adenosylcobinamide	kinase	/	adenosylcobinamide-phosphate	guanylyltransferase	[EC:2.7.1.156	2.7.7.62]
D	DYST_04015;	K02233	E2.7.8.26,	cobS,	cobV;	adenosylcobinamide-GDP	ribazoletransferase	[EC:2.7.8.26]
D	DYST_04013;	K00768	E2.4.2.21,	cobU,	cobT;	nicotinate-nucleotide--dimethylbenzimidazole	phosphoribosyltransferase	[EC:2.4.2.21]
D	DYST_04014;	K02226	cobC,	phpB;	alpha-ribazole	phosphatase	[EC:3.1.3.73]
D	DYST_00509;	K04034	bchE;	anaerobic	magnesium-protoporphyrin	IX	monomethyl	ester	cyclase	[EC:1.21.98.3]
D	DYST_00652;	K04034	bchE;	anaerobic	magnesium-protoporphyrin	IX	monomethyl	ester	cyclase	[EC:1.21.98.3]
D	DYST_01513;	K01195	uidA,	GUSB;	beta-glucuronidase	[EC:3.2.1.31]
D	DYST_03231;	K03594	bfr;	bacterioferritin	[EC:1.16.3.1]
C	130	Ubiquinone	and	other	terpenoid-quinone	biosynthesis	[PATH:ko00130]
D	DYST_02903;	K03179	ubiA;	4-hydroxybenzoate	polyprenyltransferase	[EC:2.5.1.39]
D	DYST_03916;	K18800	ubiI;	2-polyprenylphenol	6-hydroxylase	[EC:1.14.13.240]
D	DYST_01693;	K00568	ubiG;	2-polyprenyl-6-hydroxyphenyl	methylase	/	3-demethylubiquinone-9	3-methyltransferase	[EC:2.1.1.222	2.1.1.64]
D	DYST_03915;	K03185	ubiH;	2-octaprenyl-6-methoxyphenol	hydroxylase	[EC:1.14.13.-]
D	DYST_02822;	K03183	ubiE;	demethylmenaquinone	methyltransferase	/	2-methoxy-6-polyprenyl-1,4-benzoquinol	methylase	[EC:2.1.1.163	2.1.1.201]
D	DYST_03683;	K06134	COQ7;	3-demethoxyubiquinol	3-hydroxylase	[EC:1.14.99.60]
D	DYST_02512;	K19222	menI,	DHNAT;	1,4-dihydroxy-2-naphthoyl-CoA	hydrolase	[EC:3.1.2.28]
D	DYST_04381;	K03809	wrbA;	NAD(P)H	dehydrogenase	(quinone)	[EC:1.6.5.2]
D	DYST_02170;	K00457	HPD,	hppD;	4-hydroxyphenylpyruvate	dioxygenase	[EC:1.13.11.27]
D	DYST_03854;	K05928	E2.1.1.95;	tocopherol	O-methyltransferase	[EC:2.1.1.95]
B
B	9109	Metabolism	of	terpenoids	and	polyketides
C	900	Terpenoid	backbone	biosynthesis	[PATH:ko00900]
D	DYST_00495;	K01662	dxs;	1-deoxy-D-xylulose-5-phosphate	synthase	[EC:2.2.1.7]
D	DYST_04062;	K01662	dxs;	1-deoxy-D-xylulose-5-phosphate	synthase	[EC:2.2.1.7]
D	DYST_00497;	K00099	dxr;	1-deoxy-D-xylulose-5-phosphate	reductoisomerase	[EC:1.1.1.267]
D	DYST_04483;	K00099	dxr;	1-deoxy-D-xylulose-5-phosphate	reductoisomerase	[EC:1.1.1.267]
D	DYST_01029;	K00991	ispD;	2-C-methyl-D-erythritol	4-phosphate	cytidylyltransferase	[EC:2.7.7.60]
D	DYST_04394;	K00919	ispE;	4-diphosphocytidyl-2-C-methyl-D-erythritol	kinase	[EC:2.7.1.148]
D	DYST_01028;	K01770	ispF;	2-C-methyl-D-erythritol	2,4-cyclodiphosphate	synthase	[EC:4.6.1.12]
D	DYST_00823;	K03526	gcpE,	ispG;	(E)-4-hydroxy-3-methylbut-2-enyl-diphosphate	synthase	[EC:1.17.7.1	1.17.7.3]
D	DYST_00496;	K03527	ispH,	lytB;	4-hydroxy-3-methylbut-2-en-1-yl	diphosphate	reductase	[EC:1.17.7.4]
D	DYST_04647;	K03527	ispH,	lytB;	4-hydroxy-3-methylbut-2-en-1-yl	diphosphate	reductase	[EC:1.17.7.4]
D	DYST_01616;	K00626	ACAT,	atoB;	acetyl-CoA	C-acetyltransferase	[EC:2.3.1.9]
D	DYST_02999;	K00626	ACAT,	atoB;	acetyl-CoA	C-acetyltransferase	[EC:2.3.1.9]
D	DYST_00513;	K01823	idi,	IDI;	isopentenyl-diphosphate	Delta-isomerase	[EC:5.3.3.2]
D	DYST_00498;	K00795	ispA;	farnesyl	diphosphate	synthase	[EC:2.5.1.1	2.5.1.10]
D	DYST_04467;	K13789	GGPS;	geranylgeranyl	diphosphate	synthase,	type	II	[EC:2.5.1.1	2.5.1.10	2.5.1.29]
D	DYST_03919;	K02523	ispB;	octaprenyl-diphosphate	synthase	[EC:2.5.1.90]
D	DYST_04485;	K00806	uppS;	undecaprenyl	diphosphate	synthase	[EC:2.5.1.31]
D	DYST_02697;	K00587	ICMT,	STE14;	protein-S-isoprenylcysteine	O-methyltransferase	[EC:2.1.1.100]
D	DYST_03855;	K15889	PCME;	prenylcysteine	alpha-carboxyl	methylesterase	[EC:3.1.1.-]
C	902	Monoterpenoid	biosynthesis	[PATH:ko00902]
C	909	Sesquiterpenoid	and	triterpenoid	biosynthesis	[PATH:ko00909]
D	DYST_00504;	K00801	FDFT1;	farnesyl-diphosphate	farnesyltransferase	[EC:2.5.1.21]
D	DYST_00503;	K06045	shc;	squalene-hopene/tetraprenyl-beta-curcumene	cyclase	[EC:5.4.99.17	4.2.1.129]
C	904	Diterpenoid	biosynthesis	[PATH:ko00904]
C	906	Carotenoid	biosynthesis	[PATH:ko00906]
D	DYST_00954;	K09838	ZEP,	ABA1;	zeaxanthin	epoxidase	[EC:1.14.15.21]
D	DYST_02694;	K09838	ZEP,	ABA1;	zeaxanthin	epoxidase	[EC:1.14.15.21]
D	DYST_01557;	K10209	crtN;	4,4'-diapophytoene	desaturase	[EC:1.3.8.2]
C	905	Brassinosteroid	biosynthesis	[PATH:ko00905]
C	981	Insect	hormone	biosynthesis	[PATH:ko00981]
D	DYST_00669;	K00128	ALDH;	aldehyde	dehydrogenase	(NAD+)	[EC:1.2.1.3]
D	DYST_01095;	K00128	ALDH;	aldehyde	dehydrogenase	(NAD+)	[EC:1.2.1.3]
C	908	Zeatin	biosynthesis	[PATH:ko00908]
D	DYST_01312;	K00791	miaA,	TRIT1;	tRNA	dimethylallyltransferase	[EC:2.5.1.75]
C	903	Limonene	and	pinene	degradation	[PATH:ko00903]
D	DYST_00669;	K00128	ALDH;	aldehyde	dehydrogenase	(NAD+)	[EC:1.2.1.3]
D	DYST_01095;	K00128	ALDH;	aldehyde	dehydrogenase	(NAD+)	[EC:1.2.1.3]
D	DYST_00877;	K01782	fadJ;	3-hydroxyacyl-CoA	dehydrogenase	/	enoyl-CoA	hydratase	/	3-hydroxybutyryl-CoA	epimerase	[EC:1.1.1.35	4.2.1.17	5.1.2.3]
C	281	Geraniol	degradation	[PATH:ko00281]
D	DYST_04238;	K12957	ahr;	alcohol/geraniol	dehydrogenase	(NADP+)	[EC:1.1.1.2	1.1.1.183]
D	DYST_02411;	K13775	atuG;	citronellol/citronellal	dehydrogenase
D	DYST_01651;	K01640	HMGCL,	hmgL;	hydroxymethylglutaryl-CoA	lyase	[EC:4.1.3.4]
D	DYST_00438;	K00632	fadA,	fadI;	acetyl-CoA	acyltransferase	[EC:2.3.1.16]
D	DYST_01089;	K00632	fadA,	fadI;	acetyl-CoA	acyltransferase	[EC:2.3.1.16]
D	DYST_00877;	K01782	fadJ;	3-hydroxyacyl-CoA	dehydrogenase	/	enoyl-CoA	hydratase	/	3-hydroxybutyryl-CoA	epimerase	[EC:1.1.1.35	4.2.1.17	5.1.2.3]
C	1052	Type	I	polyketide	structures	[PATH:ko01052]
C	522	Biosynthesis	of	12-,	-14	and	16-membered	macrolides	[PATH:ko00522]
C	1051	Biosynthesis	of	ansamycins	[PATH:ko01051]
D	DYST_00303;	K00615	E2.2.1.1,	tktA,	tktB;	transketolase	[EC:2.2.1.1]
D	DYST_02154;	K00615	E2.2.1.1,	tktA,	tktB;	transketolase	[EC:2.2.1.1]
D	DYST_02862;	K00615	E2.2.1.1,	tktA,	tktB;	transketolase	[EC:2.2.1.1]
C	1059	Biosynthesis	of	enediyne	antibiotics	[PATH:ko01059]
C	1056	Biosynthesis	of	type	II	polyketide	backbone	[PATH:ko01056]
C	1057	Biosynthesis	of	type	II	polyketide	products	[PATH:ko01057]
C	253	Tetracycline	biosynthesis	[PATH:ko00253]
C	523	Polyketide	sugar	unit	biosynthesis	[PATH:ko00523]
D	DYST_02139;	K00973	rfbA,	rmlA,	rffH;	glucose-1-phosphate	thymidylyltransferase	[EC:2.7.7.24]
D	DYST_02138;	K01710	rfbB,	rmlB,	rffG;	dTDP-glucose	4,6-dehydratase	[EC:4.2.1.46]
D	DYST_02585;	K01710	rfbB,	rmlB,	rffG;	dTDP-glucose	4,6-dehydratase	[EC:4.2.1.46]
D	DYST_02140;	K01790	rfbC,	rmlC;	dTDP-4-dehydrorhamnose	3,5-epimerase	[EC:5.1.3.13]
D	DYST_02141;	K00067	rfbD,	rmlD;	dTDP-4-dehydrorhamnose	reductase	[EC:1.1.1.133]
C	1054	Nonribosomal	peptide	structures	[PATH:ko01054]
D	DYST_00928;	K15667	ppsD,	fenA;	plipastatin/fengycin	lipopeptide	synthetase	D
C	1053	Biosynthesis	of	siderophore	group	nonribosomal	peptides	[PATH:ko01053]
C	1055	Biosynthesis	of	vancomycin	group	antibiotics	[PATH:ko01055]
D	DYST_02138;	K01710	rfbB,	rmlB,	rffG;	dTDP-glucose	4,6-dehydratase	[EC:4.2.1.46]
D	DYST_02585;	K01710	rfbB,	rmlB,	rffG;	dTDP-glucose	4,6-dehydratase	[EC:4.2.1.46]
B
B	9110	Biosynthesis	of	other	secondary	metabolites
C	940	Phenylpropanoid	biosynthesis	[PATH:ko00940]
D	DYST_01554;	K03782	katG;	catalase-peroxidase	[EC:1.11.1.21]
D	DYST_03369;	K05349	bglX;	beta-glucosidase	[EC:3.2.1.21]
D	DYST_03401;	K05349	bglX;	beta-glucosidase	[EC:3.2.1.21]
C	945	Stilbenoid,	diarylheptanoid	and	gingerol	biosynthesis	[PATH:ko00945]
C	941	Flavonoid	biosynthesis	[PATH:ko00941]
C	944	Flavone	and	flavonol	biosynthesis	[PATH:ko00944]
D	DYST_01513;	K01195	uidA,	GUSB;	beta-glucuronidase	[EC:3.2.1.31]
C	942	Anthocyanin	biosynthesis	[PATH:ko00942]
C	943	Isoflavonoid	biosynthesis	[PATH:ko00943]
C	901	Indole	alkaloid	biosynthesis	[PATH:ko00901]
D	DYST_01839;	K01593	DDC,	TDC;	aromatic-L-amino-acid/L-tryptophan	decarboxylase	[EC:4.1.1.28	4.1.1.105]
C	403	Indole	diterpene	alkaloid	biosynthesis	[PATH:ko00403]
C	950	Isoquinoline	alkaloid	biosynthesis	[PATH:ko00950]
D	DYST_01341;	K00812	aspB;	aspartate	aminotransferase	[EC:2.6.1.1]
D	DYST_03306;	K00832	tyrB;	aromatic-amino-acid	transaminase	[EC:2.6.1.57]
D	DYST_01839;	K01593	DDC,	TDC;	aromatic-L-amino-acid/L-tryptophan	decarboxylase	[EC:4.1.1.28	4.1.1.105]
C	960	Tropane,	piperidine	and	pyridine	alkaloid	biosynthesis	[PATH:ko00960]
D	DYST_02286;	K08081	TR1;	tropinone	reductase	I	[EC:1.1.1.206]
D	DYST_01341;	K00812	aspB;	aspartate	aminotransferase	[EC:2.6.1.1]
D	DYST_01064;	K00817	hisC;	histidinol-phosphate	aminotransferase	[EC:2.6.1.9]
D	DYST_03306;	K00832	tyrB;	aromatic-amino-acid	transaminase	[EC:2.6.1.57]
C	1058	Acridone	alkaloid	biosynthesis	[PATH:ko01058]
C	232	Caffeine	metabolism	[PATH:ko00232]
C	965	Betalain	biosynthesis	[PATH:ko00965]
D	DYST_01839;	K01593	DDC,	TDC;	aromatic-L-amino-acid/L-tryptophan	decarboxylase	[EC:4.1.1.28	4.1.1.105]
D	DYST_01742;	K15777	DOPA;	4,5-DOPA	dioxygenase	extradiol	[EC:1.13.11.-]
C	966	Glucosinolate	biosynthesis	[PATH:ko00966]
D	DYST_02892;	K01703	leuC,	IPMI-L;	3-isopropylmalate/(R)-2-methylmalate	dehydratase	large	subunit	[EC:4.2.1.33	4.2.1.35]
D	DYST_02890;	K00826	E2.6.1.42,	ilvE;	branched-chain	amino	acid	aminotransferase	[EC:2.6.1.42]
D	DYST_03827;	K00826	E2.6.1.42,	ilvE;	branched-chain	amino	acid	aminotransferase	[EC:2.6.1.42]
C	402	Benzoxazinoid	biosynthesis	[PATH:ko00402]
C	311	Penicillin	and	cephalosporin	biosynthesis	[PATH:ko00311]
D	DYST_02500;	K00273	DAO,	aao;	D-amino-acid	oxidase	[EC:1.4.3.3]
D	DYST_01162;	K17836	penP;	beta-lactamase	class	A	[EC:3.5.2.6]
C	332	Carbapenem	biosynthesis	[PATH:ko00332]
D	DYST_01672;	K00931	proB;	glutamate	5-kinase	[EC:2.7.2.11]
D	DYST_01671;	K00147	proA;	glutamate-5-semialdehyde	dehydrogenase	[EC:1.2.1.41]
C	261	Monobactam	biosynthesis	[PATH:ko00261]
D	DYST_02109;	K00955	cysNC;	bifunctional	enzyme	CysN/CysC	[EC:2.7.7.4	2.7.1.25]
D	DYST_02110;	K00957	cysD;	sulfate	adenylyltransferase	subunit	2	[EC:2.7.7.4]
D	DYST_00031;	K00958	sat,	met3;	sulfate	adenylyltransferase	[EC:2.7.7.4]
D	DYST_04092;	K00928	lysC;	aspartate	kinase	[EC:2.7.2.4]
D	DYST_02073;	K12525	metL;	bifunctional	aspartokinase	/	homoserine	dehydrogenase	2	[EC:2.7.2.4	1.1.1.3]
D	DYST_01213;	K00133	asd;	aspartate-semialdehyde	dehydrogenase	[EC:1.2.1.11]
D	DYST_04612;	K01714	dapA;	4-hydroxy-tetrahydrodipicolinate	synthase	[EC:4.3.3.7]
D	DYST_00102;	K00215	dapB;	4-hydroxy-tetrahydrodipicolinate	reductase	[EC:1.17.1.8]
C	331	Clavulanic	acid	biosynthesis	[PATH:ko00331]
C	521	Streptomycin	biosynthesis	[PATH:ko00521]
D	DYST_02793;	K00845	glk;	glucokinase	[EC:2.7.1.2]
D	DYST_02843;	K00845	glk;	glucokinase	[EC:2.7.1.2]
D	DYST_02853;	K00845	glk;	glucokinase	[EC:2.7.1.2]
D	DYST_00302;	K01835	pgm;	phosphoglucomutase	[EC:5.4.2.2]
D	DYST_00762;	K01835	pgm;	phosphoglucomutase	[EC:5.4.2.2]
D	DYST_02974;	K15778	pmm-pgm;	phosphomannomutase	/	phosphoglucomutase	[EC:5.4.2.8	5.4.2.2]
D	DYST_04146;	K01092	E3.1.3.25,	IMPA,	suhB;	myo-inositol-1(or	4)-monophosphatase	[EC:3.1.3.25]
D	DYST_02139;	K00973	rfbA,	rmlA,	rffH;	glucose-1-phosphate	thymidylyltransferase	[EC:2.7.7.24]
D	DYST_02138;	K01710	rfbB,	rmlB,	rffG;	dTDP-glucose	4,6-dehydratase	[EC:4.2.1.46]
D	DYST_02585;	K01710	rfbB,	rmlB,	rffG;	dTDP-glucose	4,6-dehydratase	[EC:4.2.1.46]
D	DYST_02140;	K01790	rfbC,	rmlC;	dTDP-4-dehydrorhamnose	3,5-epimerase	[EC:5.1.3.13]
D	DYST_02141;	K00067	rfbD,	rmlD;	dTDP-4-dehydrorhamnose	reductase	[EC:1.1.1.133]
C	524	Neomycin,	kanamycin	and	gentamicin	biosynthesis	[PATH:ko00524]
D	DYST_02793;	K00845	glk;	glucokinase	[EC:2.7.1.2]
D	DYST_02843;	K00845	glk;	glucokinase	[EC:2.7.1.2]
D	DYST_02853;	K00845	glk;	glucokinase	[EC:2.7.1.2]
C	525	Acarbose	and	validamycin	biosynthesis	[PATH:ko00525]
D	DYST_02139;	K00973	rfbA,	rmlA,	rffH;	glucose-1-phosphate	thymidylyltransferase	[EC:2.7.7.24]
D	DYST_02138;	K01710	rfbB,	rmlB,	rffG;	dTDP-glucose	4,6-dehydratase	[EC:4.2.1.46]
D	DYST_02585;	K01710	rfbB,	rmlB,	rffG;	dTDP-glucose	4,6-dehydratase	[EC:4.2.1.46]
C	401	Novobiocin	biosynthesis	[PATH:ko00401]
D	DYST_01341;	K00812	aspB;	aspartate	aminotransferase	[EC:2.6.1.1]
D	DYST_01064;	K00817	hisC;	histidinol-phosphate	aminotransferase	[EC:2.6.1.9]
D	DYST_03306;	K00832	tyrB;	aromatic-amino-acid	transaminase	[EC:2.6.1.57]
C	404	Staurosporine	biosynthesis	[PATH:ko00404]
C	405	Phenazine	biosynthesis	[PATH:ko00405]
D	DYST_04544;	K06998	phzF;	trans-2,3-dihydro-3-hydroxyanthranilate	isomerase	[EC:5.3.3.17]
D	DYST_03659;	K01657	trpE;	anthranilate	synthase	component	I	[EC:4.1.3.27]
D	DYST_03676;	K01658	trpG;	anthranilate	synthase	component	II	[EC:4.1.3.27]
C	333	Prodigiosin	biosynthesis	[PATH:ko00333]
D	DYST_04895;	K00645	fabD,	MCAT,	MCT1;	[acyl-carrier-protein]	S-malonyltransferase	[EC:2.3.1.39]
D	DYST_01719;	K00059	fabG,	OAR1;	3-oxoacyl-[acyl-carrier	protein]	reductase	[EC:1.1.1.100]
D	DYST_02978;	K00059	fabG,	OAR1;	3-oxoacyl-[acyl-carrier	protein]	reductase	[EC:1.1.1.100]
D	DYST_03267;	K00059	fabG,	OAR1;	3-oxoacyl-[acyl-carrier	protein]	reductase	[EC:1.1.1.100]
D	DYST_04121;	K00059	fabG,	OAR1;	3-oxoacyl-[acyl-carrier	protein]	reductase	[EC:1.1.1.100]
D	DYST_04572;	K00059	fabG,	OAR1;	3-oxoacyl-[acyl-carrier	protein]	reductase	[EC:1.1.1.100]
D	DYST_04896;	K00059	fabG,	OAR1;	3-oxoacyl-[acyl-carrier	protein]	reductase	[EC:1.1.1.100]
C	254	Aflatoxin	biosynthesis	[PATH:ko00254]
C	999	Biosynthesis	of	various	secondary	metabolites	-	part	1	[PATH:ko00999]
C	998	Biosynthesis	of	various	secondary	metabolites	-	part	2	[PATH:ko00998]
D	DYST_03259;	K02078	acpP;	acyl	carrier	protein
D	DYST_04897;	K02078	acpP;	acyl	carrier	protein
C	997	Biosynthesis	of	various	secondary	metabolites	-	part	3	[PATH:ko00997]
D	DYST_03850;	K00789	metK,	MAT;	S-adenosylmethionine	synthetase	[EC:2.5.1.6]
B
B	9111	Xenobiotics	biodegradation	and	metabolism
C	362	Benzoate	degradation	[PATH:ko00362]
D	DYST_03936;	K05783	benD-xylL;	dihydroxycyclohexadiene	carboxylate	dehydrogenase	[EC:1.3.1.25	1.3.1.-]
D	DYST_00438;	K00632	fadA,	fadI;	acetyl-CoA	acyltransferase	[EC:2.3.1.16]
D	DYST_01089;	K00632	fadA,	fadI;	acetyl-CoA	acyltransferase	[EC:2.3.1.16]
D	DYST_00537;	K01607	pcaC;	4-carboxymuconolactone	decarboxylase	[EC:4.1.1.44]
D	DYST_03440;	K01607	pcaC;	4-carboxymuconolactone	decarboxylase	[EC:4.1.1.44]
D	DYST_03610;	K01607	pcaC;	4-carboxymuconolactone	decarboxylase	[EC:4.1.1.44]
D	DYST_00877;	K01782	fadJ;	3-hydroxyacyl-CoA	dehydrogenase	/	enoyl-CoA	hydratase	/	3-hydroxybutyryl-CoA	epimerase	[EC:1.1.1.35	4.2.1.17	5.1.2.3]
D	DYST_00439;	K07516	fadN;	3-hydroxyacyl-CoA	dehydrogenase	[EC:1.1.1.35]
D	DYST_01088;	K07516	fadN;	3-hydroxyacyl-CoA	dehydrogenase	[EC:1.1.1.35]
D	DYST_01451;	K00252	GCDH,	gcdH;	glutaryl-CoA	dehydrogenase	[EC:1.3.8.6]
D	DYST_01616;	K00626	ACAT,	atoB;	acetyl-CoA	C-acetyltransferase	[EC:2.3.1.9]
D	DYST_02999;	K00626	ACAT,	atoB;	acetyl-CoA	C-acetyltransferase	[EC:2.3.1.9]
C	627	Aminobenzoate	degradation	[PATH:ko00627]
D	DYST_04384;	K01512	acyP;	acylphosphatase	[EC:3.6.1.7]
C	364	Fluorobenzoate	degradation	[PATH:ko00364]
D	DYST_03936;	K05783	benD-xylL;	dihydroxycyclohexadiene	carboxylate	dehydrogenase	[EC:1.3.1.25	1.3.1.-]
D	DYST_01228;	K01061	E3.1.1.45;	carboxymethylenebutenolidase	[EC:3.1.1.45]
C	625	Chloroalkane	and	chloroalkene	degradation	[PATH:ko00625]
D	DYST_02738;	K01563	dhaA;	haloalkane	dehalogenase	[EC:3.8.1.5]
D	DYST_04774;	K13953	adhP;	alcohol	dehydrogenase,	propanol-preferring	[EC:1.1.1.1]
D	DYST_01403;	K00121	frmA,	ADH5,	adhC;	S-(hydroxymethyl)glutathione	dehydrogenase	/	alcohol	dehydrogenase	[EC:1.1.1.284	1.1.1.1]
D	DYST_00669;	K00128	ALDH;	aldehyde	dehydrogenase	(NAD+)	[EC:1.2.1.3]
D	DYST_01095;	K00128	ALDH;	aldehyde	dehydrogenase	(NAD+)	[EC:1.2.1.3]
D	DYST_03432;	K08726	EPHX2;	soluble	epoxide	hydrolase	/	lipid-phosphate	phosphatase	[EC:3.3.2.10	3.1.3.76]
D	DYST_01236;	K01560	E3.8.1.2;	2-haloacid	dehalogenase	[EC:3.8.1.2]
C	361	Chlorocyclohexane	and	chlorobenzene	degradation	[PATH:ko00361]
D	DYST_02738;	K01563	dhaA;	haloalkane	dehalogenase	[EC:3.8.1.5]
D	DYST_01228;	K01061	E3.1.1.45;	carboxymethylenebutenolidase	[EC:3.1.1.45]
D	DYST_01236;	K01560	E3.8.1.2;	2-haloacid	dehalogenase	[EC:3.8.1.2]
C	623	Toluene	degradation	[PATH:ko00623]
D	DYST_01228;	K01061	E3.1.1.45;	carboxymethylenebutenolidase	[EC:3.1.1.45]
C	622	Xylene	degradation	[PATH:ko00622]
D	DYST_03936;	K05783	benD-xylL;	dihydroxycyclohexadiene	carboxylate	dehydrogenase	[EC:1.3.1.25	1.3.1.-]
C	633	Nitrotoluene	degradation	[PATH:ko00633]
D	DYST_01487;	K10680	nemA;	N-ethylmaleimide	reductase	[EC:1.-.-.-]
C	642	Ethylbenzene	degradation	[PATH:ko00642]
D	DYST_00438;	K00632	fadA,	fadI;	acetyl-CoA	acyltransferase	[EC:2.3.1.16]
D	DYST_01089;	K00632	fadA,	fadI;	acetyl-CoA	acyltransferase	[EC:2.3.1.16]
C	643	Styrene	degradation	[PATH:ko00643]
D	DYST_02168;	K00451	HGD,	hmgA;	homogentisate	1,2-dioxygenase	[EC:1.13.11.5]
D	DYST_02167;	K16171	faaH;	fumarylacetoacetate	(FAA)	hydrolase	[EC:3.7.1.2]
C	791	Atrazine	degradation	[PATH:ko00791]
C	930	Caprolactam	degradation	[PATH:ko00930]
D	DYST_00877;	K01782	fadJ;	3-hydroxyacyl-CoA	dehydrogenase	/	enoyl-CoA	hydratase	/	3-hydroxybutyryl-CoA	epimerase	[EC:1.1.1.35	4.2.1.17	5.1.2.3]
C	363	Bisphenol	degradation	[PATH:ko00363]
C	621	Dioxin	degradation	[PATH:ko00621]
C	626	Naphthalene	degradation	[PATH:ko00626]
D	DYST_04774;	K13953	adhP;	alcohol	dehydrogenase,	propanol-preferring	[EC:1.1.1.1]
D	DYST_01403;	K00121	frmA,	ADH5,	adhC;	S-(hydroxymethyl)glutathione	dehydrogenase	/	alcohol	dehydrogenase	[EC:1.1.1.284	1.1.1.1]
C	624	Polycyclic	aromatic	hydrocarbon	degradation	[PATH:ko00624]
C	365	Furfural	degradation	[PATH:ko00365]
C	984	Steroid	degradation	[PATH:ko00984]
D	DYST_02572;	K15983	kshB;	3-ketosteroid	9alpha-monooxygenase	subunit	B	[EC:1.14.15.30]
C	980	Metabolism	of	xenobiotics	by	cytochrome	P450	[PATH:ko00980]
D	DYST_00036;	K00799	GST,	gst;	glutathione	S-transferase	[EC:2.5.1.18]
D	DYST_01328;	K00799	GST,	gst;	glutathione	S-transferase	[EC:2.5.1.18]
D	DYST_01586;	K00799	GST,	gst;	glutathione	S-transferase	[EC:2.5.1.18]
D	DYST_01590;	K00799	GST,	gst;	glutathione	S-transferase	[EC:2.5.1.18]
D	DYST_01750;	K00799	GST,	gst;	glutathione	S-transferase	[EC:2.5.1.18]
D	DYST_02487;	K00799	GST,	gst;	glutathione	S-transferase	[EC:2.5.1.18]
D	DYST_02588;	K00799	GST,	gst;	glutathione	S-transferase	[EC:2.5.1.18]
D	DYST_02610;	K00799	GST,	gst;	glutathione	S-transferase	[EC:2.5.1.18]
D	DYST_02651;	K00799	GST,	gst;	glutathione	S-transferase	[EC:2.5.1.18]
D	DYST_02826;	K00799	GST,	gst;	glutathione	S-transferase	[EC:2.5.1.18]
D	DYST_03063;	K00799	GST,	gst;	glutathione	S-transferase	[EC:2.5.1.18]
D	DYST_03845;	K00799	GST,	gst;	glutathione	S-transferase	[EC:2.5.1.18]
D	DYST_04224;	K00078	DHDH;	dihydrodiol	dehydrogenase	/	D-xylose	1-dehydrogenase	(NADP)	[EC:1.3.1.20	1.1.1.179]
D	DYST_03159;	K17690	CYP3A5;	cytochrome	P450	family	3	subfamily	A5	[EC:1.14.14.1]
D	DYST_01403;	K00121	frmA,	ADH5,	adhC;	S-(hydroxymethyl)glutathione	dehydrogenase	/	alcohol	dehydrogenase	[EC:1.1.1.284	1.1.1.1]
D	DYST_04774;	K13953	adhP;	alcohol	dehydrogenase,	propanol-preferring	[EC:1.1.1.1]
C	982	Drug	metabolism	-	cytochrome	P450	[PATH:ko00982]
D	DYST_03159;	K17690	CYP3A5;	cytochrome	P450	family	3	subfamily	A5	[EC:1.14.14.1]
D	DYST_00036;	K00799	GST,	gst;	glutathione	S-transferase	[EC:2.5.1.18]
D	DYST_01328;	K00799	GST,	gst;	glutathione	S-transferase	[EC:2.5.1.18]
D	DYST_01586;	K00799	GST,	gst;	glutathione	S-transferase	[EC:2.5.1.18]
D	DYST_01590;	K00799	GST,	gst;	glutathione	S-transferase	[EC:2.5.1.18]
D	DYST_01750;	K00799	GST,	gst;	glutathione	S-transferase	[EC:2.5.1.18]
D	DYST_02487;	K00799	GST,	gst;	glutathione	S-transferase	[EC:2.5.1.18]
D	DYST_02588;	K00799	GST,	gst;	glutathione	S-transferase	[EC:2.5.1.18]
D	DYST_02610;	K00799	GST,	gst;	glutathione	S-transferase	[EC:2.5.1.18]
D	DYST_02651;	K00799	GST,	gst;	glutathione	S-transferase	[EC:2.5.1.18]
D	DYST_02826;	K00799	GST,	gst;	glutathione	S-transferase	[EC:2.5.1.18]
D	DYST_03063;	K00799	GST,	gst;	glutathione	S-transferase	[EC:2.5.1.18]
D	DYST_03845;	K00799	GST,	gst;	glutathione	S-transferase	[EC:2.5.1.18]
D	DYST_01403;	K00121	frmA,	ADH5,	adhC;	S-(hydroxymethyl)glutathione	dehydrogenase	/	alcohol	dehydrogenase	[EC:1.1.1.284	1.1.1.1]
D	DYST_04774;	K13953	adhP;	alcohol	dehydrogenase,	propanol-preferring	[EC:1.1.1.1]
C	983	Drug	metabolism	-	other	enzymes	[PATH:ko00983]
D	DYST_00858;	K00760	hprT,	hpt,	HPRT1;	hypoxanthine	phosphoribosyltransferase	[EC:2.4.2.8]
D	DYST_00452;	K00088	IMPDH,	guaB;	IMP	dehydrogenase	[EC:1.1.1.205]
D	DYST_00453;	K01951	guaA,	GMPS;	GMP	synthase	(glutamine-hydrolysing)	[EC:6.3.5.2]
D	DYST_02956;	K01951	guaA,	GMPS;	GMP	synthase	(glutamine-hydrolysing)	[EC:6.3.5.2]
D	DYST_01513;	K01195	uidA,	GUSB;	beta-glucuronidase	[EC:3.2.1.31]
D	DYST_04356;	K01489	cdd,	CDA;	cytidine	deaminase	[EC:3.5.4.5]
D	DYST_02812;	K00857	tdk,	TK;	thymidine	kinase	[EC:2.7.1.21]
D	DYST_00441;	K00940	ndk,	NME;	nucleoside-diphosphate	kinase	[EC:2.7.4.6]
D	DYST_02975;	K01520	dut,	DUT;	dUTP	pyrophosphatase	[EC:3.6.1.23]
D	DYST_01554;	K03782	katG;	catalase-peroxidase	[EC:1.11.1.21]
D	DYST_00036;	K00799	GST,	gst;	glutathione	S-transferase	[EC:2.5.1.18]
D	DYST_01328;	K00799	GST,	gst;	glutathione	S-transferase	[EC:2.5.1.18]
D	DYST_01586;	K00799	GST,	gst;	glutathione	S-transferase	[EC:2.5.1.18]
D	DYST_01590;	K00799	GST,	gst;	glutathione	S-transferase	[EC:2.5.1.18]
D	DYST_01750;	K00799	GST,	gst;	glutathione	S-transferase	[EC:2.5.1.18]
D	DYST_02487;	K00799	GST,	gst;	glutathione	S-transferase	[EC:2.5.1.18]
D	DYST_02588;	K00799	GST,	gst;	glutathione	S-transferase	[EC:2.5.1.18]
D	DYST_02610;	K00799	GST,	gst;	glutathione	S-transferase	[EC:2.5.1.18]
D	DYST_02651;	K00799	GST,	gst;	glutathione	S-transferase	[EC:2.5.1.18]
D	DYST_02826;	K00799	GST,	gst;	glutathione	S-transferase	[EC:2.5.1.18]
D	DYST_03063;	K00799	GST,	gst;	glutathione	S-transferase	[EC:2.5.1.18]
D	DYST_03845;	K00799	GST,	gst;	glutathione	S-transferase	[EC:2.5.1.18]

## Sheet: Level 1- Genetic Info Processin
Level 1 KEGG Annotations for Genetic Information Processing
A09120 Genetic Information Processing
B
B 09121 Transcription
C 03020 RNA polymerase [PATH:ko03020]
D DYST_04413; K03043 rpoB; DNA-directed RNA polymerase subunit beta [EC:2.7.7.6]
D DYST_04414; K03046 rpoC; DNA-directed RNA polymerase subunit beta' [EC:2.7.7.6]
D DYST_04444; K03040 rpoA; DNA-directed RNA polymerase subunit alpha [EC:2.7.7.6]
D DYST_03778; K03060 rpoZ; DNA-directed RNA polymerase subunit omega [EC:2.7.7.6]
C 03022 Basal transcription factors [PATH:ko03022]
C 03040 Spliceosome [PATH:ko03040]
B
B 09122 Translation
C 03010 Ribosome [PATH:ko03010]
D DYST_00115; K02945 RP-S1, rpsA; small subunit ribosomal protein S1
D DYST_04489; K02967 RP-S2, MRPS2, rpsB; small subunit ribosomal protein S2
D DYST_04426; K02982 RP-S3, rpsC; small subunit ribosomal protein S3
D DYST_04443; K02986 RP-S4, rpsD; small subunit ribosomal protein S4
D DYST_04437; K02988 RP-S5, MRPS5, rpsE; small subunit ribosomal protein S5
D DYST_01714; K02990 RP-S6, MRPS6, rpsF; small subunit ribosomal protein S6
D DYST_04416; K02992 RP-S7, MRPS7, rpsG; small subunit ribosomal protein S7
D DYST_04434; K02994 RP-S8, rpsH; small subunit ribosomal protein S8
D DYST_03686; K02996 RP-S9, MRPS9, rpsI; small subunit ribosomal protein S9
D DYST_04419; K02946 RP-S10, MRPS10, rpsJ; small subunit ribosomal protein S10
D DYST_04442; K02948 RP-S11, MRPS11, rpsK; small subunit ribosomal protein S11
D DYST_04415; K02950 RP-S12, MRPS12, rpsL; small subunit ribosomal protein S12
D DYST_04441; K02952 RP-S13, rpsM; small subunit ribosomal protein S13
D DYST_04433; K02954 RP-S14, MRPS14, rpsN; small subunit ribosomal protein S14
D DYST_00006; K02956 RP-S15, MRPS15, rpsO; small subunit ribosomal protein S15
D DYST_04429; K02961 RP-S17, MRPS17, rpsQ; small subunit ribosomal protein S17
D DYST_01713; K02963 RP-S18, MRPS18, rpsR; small subunit ribosomal protein S18
D DYST_04424; K02965 RP-S19, rpsS; small subunit ribosomal protein S19
D DYST_04642; K02968 RP-S20, rpsT; small subunit ribosomal protein S20
D DYST_03482; K02970 RP-S21, MRPS21, rpsU; small subunit ribosomal protein S21
D DYST_04410; K02863 RP-L1, MRPL1, rplA; large subunit ribosomal protein L1
D DYST_04423; K02886 RP-L2, MRPL2, rplB; large subunit ribosomal protein L2
D DYST_04420; K02906 RP-L3, MRPL3, rplC; large subunit ribosomal protein L3
D DYST_04421; K02926 RP-L4, MRPL4, rplD; large subunit ribosomal protein L4
D DYST_04432; K02931 RP-L5, MRPL5, rplE; large subunit ribosomal protein L5
D DYST_04435; K02933 RP-L6, MRPL6, rplF; large subunit ribosomal protein L6
D DYST_04412; K02935 RP-L7, MRPL12, rplL; large subunit ribosomal protein L7/L12
D DYST_01712; K02939 RP-L9, MRPL9, rplI; large subunit ribosomal protein L9
D DYST_04411; K02864 RP-L10, MRPL10, rplJ; large subunit ribosomal protein L10
D DYST_04409; K02867 RP-L11, MRPL11, rplK; large subunit ribosomal protein L11
D DYST_03685; K02871 RP-L13, MRPL13, rplM; large subunit ribosomal protein L13
D DYST_04430; K02874 RP-L14, MRPL14, rplN; large subunit ribosomal protein L14
D DYST_04439; K02876 RP-L15, MRPL15, rplO; large subunit ribosomal protein L15
D DYST_04427; K02878 RP-L16, MRPL16, rplP; large subunit ribosomal protein L16
D DYST_04445; K02879 RP-L17, MRPL17, rplQ; large subunit ribosomal protein L17
D DYST_04436; K02881 RP-L18, MRPL18, rplR; large subunit ribosomal protein L18
D DYST_01699; K02884 RP-L19, MRPL19, rplS; large subunit ribosomal protein L19
D DYST_01929; K02887 RP-L20, MRPL20, rplT; large subunit ribosomal protein L20
D DYST_04638; K02888 RP-L21, MRPL21, rplU; large subunit ribosomal protein L21
D DYST_04425; K02890 RP-L22, MRPL22, rplV; large subunit ribosomal protein L22
D DYST_04422; K02892 RP-L23, MRPL23, rplW; large subunit ribosomal protein L23
D DYST_04431; K02895 RP-L24, MRPL24, rplX; large subunit ribosomal protein L24
D DYST_04397; K02897 RP-L25, rplY; large subunit ribosomal protein L25
D DYST_04639; K02899 RP-L27, MRPL27, rpmA; large subunit ribosomal protein L27
D DYST_02800; K02902 RP-L28, MRPL28, rpmB; large subunit ribosomal protein L28
D DYST_04428; K02904 RP-L29, rpmC; large subunit ribosomal protein L29
D DYST_03784; K02909 RP-L31, rpmE; large subunit ribosomal protein L31
D DYST_04893; K02911 RP-L32, MRPL32, rpmF; large subunit ribosomal protein L32
D DYST_02801; K02913 RP-L33, MRPL33, rpmG; large subunit ribosomal protein L33
D DYST_03092; K02914 RP-L34, MRPL34, rpmH; large subunit ribosomal protein L34
D DYST_01930; K02916 RP-L35, MRPL35, rpmI; large subunit ribosomal protein L35
C 00970 Aminoacyl-tRNA biosynthesis [PATH:ko00970]
D DYST_01200; K01885 EARS, gltX; glutamyl-tRNA synthetase [EC:6.1.1.17]
D DYST_02116; K02433 gatA, QRSL1; aspartyl-tRNA(Asn)/glutamyl-tRNA(Gln) amidotransferase subunit A [EC:6.3.5.6 6.3.5.7]
D DYST_04043; K01886 QARS, glnS; glutaminyl-tRNA synthetase [EC:6.1.1.18]
D DYST_04589; K01872 AARS, alaS; alanyl-tRNA synthetase [EC:6.1.1.7]
D DYST_04018; K01876 DARS2, aspS; aspartyl-tRNA synthetase [EC:6.1.1.12]
D DYST_01716; K01893 NARS, asnS; asparaginyl-tRNA synthetase [EC:6.1.1.22]
D DYST_02954; K01878 glyQ; glycyl-tRNA synthetase alpha chain [EC:6.1.1.14]
D DYST_02953; K01879 glyS; glycyl-tRNA synthetase beta chain [EC:6.1.1.14]
D DYST_01932; K01868 TARS, thrS; threonyl-tRNA synthetase [EC:6.1.1.3]
D DYST_00796; K01875 SARS, serS; seryl-tRNA synthetase [EC:6.1.1.11]
D DYST_01529; K01042 selA; L-seryl-tRNA(Ser) seleniumtransferase [EC:2.9.1.1]
D DYST_01684; K01883 CARS, cysS; cysteinyl-tRNA synthetase [EC:6.1.1.16]
D DYST_01239; K01874 MARS, metG; methionyl-tRNA synthetase [EC:6.1.1.10]
D DYST_03215; K00604 MTFMT, fmt; methionyl-tRNA formyltransferase [EC:2.1.2.9]
D DYST_04269; K01873 VARS, valS; valyl-tRNA synthetase [EC:6.1.1.9]
D DYST_01768; K01869 LARS, leuS; leucyl-tRNA synthetase [EC:6.1.1.4]
D DYST_04645; K01870 IARS, ileS; isoleucyl-tRNA synthetase [EC:6.1.1.5]
D DYST_00381; K04567 KARS, lysS; lysyl-tRNA synthetase, class II [EC:6.1.1.6]
D DYST_02981; K01887 RARS, argS; arginyl-tRNA synthetase [EC:6.1.1.19]
D DYST_04264; K01881 PARS, proS; prolyl-tRNA synthetase [EC:6.1.1.15]
D DYST_01073; K01892 HARS, hisS; histidyl-tRNA synthetase [EC:6.1.1.21]
D DYST_01928; K01889 FARSA, pheS; phenylalanyl-tRNA synthetase alpha chain [EC:6.1.1.20]
D DYST_01927; K01890 FARSB, pheT; phenylalanyl-tRNA synthetase beta chain [EC:6.1.1.20]
D DYST_02965; K01866 YARS, tyrS; tyrosyl-tRNA synthetase [EC:6.1.1.1]
D DYST_02183; K01867 WARS, trpS; tryptophanyl-tRNA synthetase [EC:6.1.1.2]
C 03013 Nucleocytoplasmic transport [PATH:ko03013]
C 03015 mRNA surveillance pathway [PATH:ko03015]
C 03008 Ribosome biogenesis in eukaryotes [PATH:ko03008]
D DYST_00867; K03685 rnc, DROSHA, RNT1; ribonuclease III [EC:3.1.26.3]
D DYST_00269; K13288 orn, REX2, REXO2; oligoribonuclease [EC:3.1.-.-]
D DYST_02918; K07178 RIOK1; RIO kinase 1 [EC:2.7.11.1]
B
B 09123 Folding, sorting and degradation
C 03060 Protein export [PATH:ko03060]
D DYST_04440; K03076 secY; preprotein translocase subunit SecY
D DYST_00275; K03075 secG; preprotein translocase subunit SecG
D DYST_01856; K03072 secD; preprotein translocase subunit SecD
D DYST_01854; K03074 secF; preprotein translocase subunit SecF
D DYST_01857; K03210 yajC; preprotein translocase subunit YajC
D DYST_03094; K03217 yidC, spoIIIJ, OXA1, ccfA; YidC/Oxa1 family membrane protein insertase
D DYST_03904; K03070 secA; preprotein translocase subunit SecA [EC:7.4.2.8]
D DYST_02799; K03071 secB; preprotein translocase subunit SecB
D DYST_01702; K03106 SRP54, ffh; signal recognition particle subunit SRP54 [EC:3.6.5.4]
D DYST_04168; K03110 ftsY; fused signal recognition particle receptor
D DYST_02552; K03118 tatC; sec-independent protein translocase protein TatC
D DYST_00869; K03100 lepB; signal peptidase I [EC:3.4.21.89]
D DYST_00890; K03100 lepB; signal peptidase I [EC:3.4.21.89]
D DYST_04646; K03101 lspA; signal peptidase II [EC:3.4.23.36]
C 04141 Protein processing in endoplasmic reticulum [PATH:ko04141]
D DYST_04575; K04079 HSP90A, htpG; molecular chaperone HtpG
C 04130 SNARE interactions in vesicular transport [PATH:ko04130]
C 04120 Ubiquitin mediated proteolysis [PATH:ko04120]
D DYST_02252; K08770 UBC; ubiquitin C
D DYST_00595; K03350 APC3, CDC27; anaphase-promoting complex subunit 3
C 04122 Sulfur relay system [PATH:ko04122]
D DYST_04632; K01011 TST, MPST, sseA; thiosulfate/3-mercaptopyruvate sulfurtransferase [EC:2.8.1.1 2.8.1.2]
D DYST_01271; K11996 MOCS3, UBA4; adenylyltransferase and sulfurtransferase [EC:2.7.7.80 2.8.1.11]
D DYST_00408; K00566 mnmA, trmU; tRNA-uridine 2-sulfurtransferase [EC:2.8.1.13]
D DYST_01275; K03639 moaA, CNX2; GTP 3',8-cyclase [EC:4.1.99.22]
D DYST_01272; K03636 moaD, cysO; sulfur-carrier protein
D DYST_00449; K21029 moeB; molybdopterin-synthase adenylyltransferase [EC:2.7.7.80]
D DYST_01273; K03637 moaC, CNX3; cyclic pyranopterin monophosphate synthase [EC:4.6.1.17]
D DYST_01274; K03637 moaC, CNX3; cyclic pyranopterin monophosphate synthase [EC:4.6.1.17]
D DYST_03818; K03154 thiS; sulfur carrier protein
C 03050 Proteasome [PATH:ko03050]
C 03018 RNA degradation [PATH:ko03018]
D DYST_03233; K08311 nudH; putative (di)nucleoside polyphosphate hydrolase [EC:3.6.1.-]
D DYST_00216; K08300 rne; ribonuclease E [EC:3.1.26.12]
D DYST_02307; K03732 rhlB; ATP-dependent RNA helicase RhlB [EC:3.6.4.13]
D DYST_01031; K01689 ENO, eno; enolase [EC:4.2.1.11]
D DYST_00007; K00962 pnp, PNPT1; polyribonucleotide nucleotidyltransferase [EC:2.7.7.8]
D DYST_01735; K11927 rhlE; ATP-dependent RNA helicase RhlE [EC:3.6.4.13]
D DYST_01265; K12573 rnr, vacB; ribonuclease R [EC:3.1.13.1]
D DYST_01740; K05592 deaD, cshA; ATP-dependent RNA helicase DeaD [EC:3.6.4.13]
D DYST_04153; K03654 recQ; ATP-dependent DNA helicase RecQ [EC:3.6.4.12]
D DYST_02309; K03628 rho; transcription termination factor Rho
D DYST_00100; K04043 dnaK, HSPA9; molecular chaperone DnaK
D DYST_02457; K04077 groEL, HSPD1; chaperonin GroEL
D DYST_01311; K03666 hfq; host factor-I protein
D DYST_04597; K00937 ppk1; polyphosphate kinase [EC:2.7.4.1]
D DYST_04791; K00937 ppk1; polyphosphate kinase [EC:2.7.4.1]
D DYST_04387; K22468 ppk2; polyphosphate kinase [EC:2.7.4.34]
D DYST_04616; K00970 pcnB; poly(A) polymerase [EC:2.7.7.19]
B
B 09124 Replication and repair
C 03030 DNA replication [PATH:ko03030]
D DYST_00894; K02342 dnaQ; DNA polymerase III subunit epsilon [EC:2.7.7.7]
D DYST_04472; K02337 dnaE; DNA polymerase III subunit alpha [EC:2.7.7.7]
D DYST_04880; K02343 dnaX; DNA polymerase III subunit gamma/tau [EC:2.7.7.7]
D DYST_04903; K02341 holB; DNA polymerase III subunit delta' [EC:2.7.7.7]
D DYST_01766; K02340 holA; DNA polymerase III subunit delta [EC:2.7.7.7]
D DYST_02061; K02339 holC; DNA polymerase III subunit chi [EC:2.7.7.7]
D DYST_03090; K02338 dnaN; DNA polymerase III subunit beta [EC:2.7.7.7]
D DYST_01711; K02314 dnaB; replicative DNA helicase [EC:3.6.4.12]
D DYST_03477; K02316 dnaG; DNA primase [EC:2.7.7.101]
D DYST_03930; K03111 ssb; single-strand DNA-binding protein
D DYST_00895; K03469 rnhA, RNASEH1; ribonuclease HI [EC:3.1.26.4]
D DYST_04476; K03470 rnhB; ribonuclease HII [EC:3.1.26.4]
D DYST_02490; K02335 polA; DNA polymerase I [EC:2.7.7.7]
D DYST_00402; K01972 E6.5.1.2, ligA, ligB; DNA ligase (NAD+) [EC:6.5.1.2]
C 03410 Base excision repair [PATH:ko03410]
D DYST_02810; K10563 mutM, fpg; formamidopyrimidine-DNA glycosylase [EC:3.2.2.23 4.2.99.18]
D DYST_01241; K10773 NTH; endonuclease III [EC:4.2.99.18]
D DYST_01166; K13529 ada-alkA; AraC family transcriptional regulator, regulatory protein of adaptative response / DNA-3-methyladenine glycosylase II [EC:3.2.2.21]
D DYST_02936; K01246 tag; DNA-3-methyladenine glycosylase I [EC:3.2.2.20]
D DYST_00994; K03649 mug; double-stranded uracil-DNA glycosylase [EC:3.2.2.28]
D DYST_02303; K03648 UNG, UDG; uracil-DNA glycosylase [EC:3.2.2.27]
D DYST_04166; K03575 mutY; A/G-specific adenine glycosylase [EC:3.2.2.31]
D DYST_03940; K03652 MPG; DNA-3-methyladenine glycosylase [EC:3.2.2.21]
D DYST_02970; K01142 E3.1.11.2, xthA; exodeoxyribonuclease III [EC:3.1.11.2]
D DYST_03127; K01142 E3.1.11.2, xthA; exodeoxyribonuclease III [EC:3.1.11.2]
D DYST_02490; K02335 polA; DNA polymerase I [EC:2.7.7.7]
D DYST_00231; K07462 recJ; single-stranded-DNA-specific exonuclease [EC:3.1.-.-]
D DYST_00402; K01972 E6.5.1.2, ligA, ligB; DNA ligase (NAD+) [EC:6.5.1.2]
C 03420 Nucleotide excision repair [PATH:ko03420]
D DYST_01439; K03723 mfd; transcription-repair coupling factor (superfamily II helicase) [EC:3.6.4.-]
D DYST_04636; K03701 uvrA; excinuclease ABC subunit A
D DYST_01936; K03702 uvrB; excinuclease ABC subunit B
D DYST_00427; K03703 uvrC; excinuclease ABC subunit C
D DYST_02502; K03657 uvrD, pcrA; DNA helicase II / ATP-dependent DNA helicase PcrA [EC:3.6.4.12]
D DYST_02490; K02335 polA; DNA polymerase I [EC:2.7.7.7]
D DYST_00402; K01972 E6.5.1.2, ligA, ligB; DNA ligase (NAD+) [EC:6.5.1.2]
C 03430 Mismatch repair [PATH:ko03430]
D DYST_04581; K03555 mutS; DNA mismatch repair protein MutS
D DYST_04627; K03572 mutL; DNA mismatch repair protein MutL
D DYST_02502; K03657 uvrD, pcrA; DNA helicase II / ATP-dependent DNA helicase PcrA [EC:3.6.4.12]
D DYST_00268; K01141 sbcB, exoI; exodeoxyribonuclease I [EC:3.1.11.1]
D DYST_00827; K03601 xseA; exodeoxyribonuclease VII large subunit [EC:3.1.11.6]
D DYST_04468; K03602 xseB; exodeoxyribonuclease VII small subunit [EC:3.1.11.6]
D DYST_00231; K07462 recJ; single-stranded-DNA-specific exonuclease [EC:3.1.-.-]
D DYST_03930; K03111 ssb; single-strand DNA-binding protein
D DYST_04472; K02337 dnaE; DNA polymerase III subunit alpha [EC:2.7.7.7]
D DYST_03090; K02338 dnaN; DNA polymerase III subunit beta [EC:2.7.7.7]
D DYST_04880; K02343 dnaX; DNA polymerase III subunit gamma/tau [EC:2.7.7.7]
D DYST_01766; K02340 holA; DNA polymerase III subunit delta [EC:2.7.7.7]
D DYST_04903; K02341 holB; DNA polymerase III subunit delta' [EC:2.7.7.7]
D DYST_00894; K02342 dnaQ; DNA polymerase III subunit epsilon [EC:2.7.7.7]
D DYST_02061; K02339 holC; DNA polymerase III subunit chi [EC:2.7.7.7]
D DYST_00402; K01972 E6.5.1.2, ligA, ligB; DNA ligase (NAD+) [EC:6.5.1.2]
D DYST_03527; K06223 dam; DNA adenine methylase [EC:2.1.1.72]
C 03440 Homologous recombination [PATH:ko03440]
D DYST_00231; K07462 recJ; single-stranded-DNA-specific exonuclease [EC:3.1.-.-]
D DYST_03930; K03111 ssb; single-strand DNA-binding protein
D DYST_03089; K03629 recF; DNA replication and repair protein RecF
D DYST_00865; K03584 recO; DNA repair protein RecO (recombination protein O)
D DYST_04882; K06187 recR; recombination protein RecR
D DYST_04585; K03553 recA; recombination protein RecA
D DYST_02490; K02335 polA; DNA polymerase I [EC:2.7.7.7]
D DYST_04022; K03550 ruvA; holliday junction DNA helicase RuvA [EC:3.6.4.12]
D DYST_04024; K03551 ruvB; holliday junction DNA helicase RuvB [EC:3.6.4.12]
D DYST_04021; K01159 ruvC; crossover junction endodeoxyribonuclease RuvC [EC:3.1.21.10]
D DYST_03782; K03655 recG; ATP-dependent DNA helicase RecG [EC:3.6.4.12]
D DYST_04687; K03582 recB; exodeoxyribonuclease V beta subunit [EC:3.1.11.5]
D DYST_04688; K03583 recC; exodeoxyribonuclease V gamma subunit [EC:3.1.11.5]
D DYST_04686; K03581 recD; exodeoxyribonuclease V alpha subunit [EC:3.1.11.5]
D DYST_04472; K02337 dnaE; DNA polymerase III subunit alpha [EC:2.7.7.7]
D DYST_03090; K02338 dnaN; DNA polymerase III subunit beta [EC:2.7.7.7]
D DYST_04880; K02343 dnaX; DNA polymerase III subunit gamma/tau [EC:2.7.7.7]
D DYST_01766; K02340 holA; DNA polymerase III subunit delta [EC:2.7.7.7]
D DYST_04903; K02341 holB; DNA polymerase III subunit delta' [EC:2.7.7.7]
D DYST_00894; K02342 dnaQ; DNA polymerase III subunit epsilon [EC:2.7.7.7]
D DYST_02061; K02339 holC; DNA polymerase III subunit chi [EC:2.7.7.7]
D DYST_02294; K04066 priA; primosomal protein N' (replication factor Y) (superfamily II helicase) [EC:3.6.4.-]
C 03450 Non-homologous end-joining [PATH:ko03450]
D DYST_00243; K01971 ligD; bifunctional non-homologous end joining protein LigD [EC:6.5.1.1]
C 03460 Fanconi anemia pathway [PATH:ko03460]
B
B 09125 Information processing in viruses
C 03230 Viral genome structure [PATH:ko03230]
C 03240 Viral replication [PATH:ko03240]
#

## Sheet: Level 1- Environmental Info Pro
Level 1 KEGG Annotations for Environmental Information Processing
A09130 Environmental Information Processing
B
B 09131 Membrane transport
C 02010 ABC transporters [PATH:ko02010]
D DYST_01057; K23163 sbp; sulfate/thiosulfate transport system substrate-binding protein
D DYST_01056; K02046 cysU; sulfate/thiosulfate transport system permease protein
D DYST_01055; K02047 cysW; sulfate/thiosulfate transport system permease protein
D DYST_01054; K02045 cysA; sulfate/thiosulfate transport system ATP-binding protein [EC:7.3.2.3]
D DYST_01279; K02020 modA; molybdate transport system substrate-binding protein
D DYST_01278; K02018 modB; molybdate transport system permease protein
D DYST_01277; K02017 modC; molybdate transport system ATP-binding protein [EC:7.3.2.5]
D DYST_02878; K10112 msmX, msmK, malK, sugC, ggtA, msiK; multiple sugar transport system ATP-binding protein [EC:7.5.2.-]
D DYST_03775; K07323 mlaC; phospholipid transport system substrate-binding protein
D DYST_02113; K02067 mlaD, linM; phospholipid/cholesterol/gamma-HCH transport system substrate-binding protein
D DYST_03773; K02067 mlaD, linM; phospholipid/cholesterol/gamma-HCH transport system substrate-binding protein
D DYST_02111; K02066 mlaE, linK; phospholipid/cholesterol/gamma-HCH transport system permease protein
D DYST_03772; K02066 mlaE, linK; phospholipid/cholesterol/gamma-HCH transport system permease protein
D DYST_02112; K02065 mlaF, linL, mkl; phospholipid/cholesterol/gamma-HCH transport system ATP-binding protein
D DYST_03771; K02065 mlaF, linL, mkl; phospholipid/cholesterol/gamma-HCH transport system ATP-binding protein
D DYST_01255; K02040 pstS; phosphate transport system substrate-binding protein
D DYST_02373; K02040 pstS; phosphate transport system substrate-binding protein
D DYST_01256; K02037 pstC; phosphate transport system permease protein
D DYST_01257; K02038 pstA; phosphate transport system permease protein
D DYST_01258; K02036 pstB; phosphate transport system ATP-binding protein [EC:7.3.2.1]
D DYST_01225; K02044 phnD; phosphonate transport system substrate-binding protein
D DYST_04037; K02044 phnD; phosphonate transport system substrate-binding protein
D DYST_04552; K02073 metQ; D-methionine transport system substrate-binding protein
D DYST_04553; K02072 metI; D-methionine transport system permease protein
D DYST_04554; K02071 metN; D-methionine transport system ATP-binding protein
D DYST_04280; K06858 btuF; vitamin B12 transport system substrate-binding protein
D DYST_02131; K09690 wzm, rfbA; lipopolysaccharide transport system permease protein
D DYST_02132; K09691 wzt, rbfB; lipopolysaccharide transport system ATP-binding protein
D DYST_02562; K09696 natB; sodium transport system permease protein
D DYST_02563; K09697 natA; sodium transport system ATP-binding protein [EC:7.2.2.4]
D DYST_04865; K09808 lolC_E; lipoprotein-releasing system permease protein
D DYST_04866; K09810 lolD; lipoprotein-releasing system ATP-binding protein [EC:7.6.2.-]
D DYST_04841; K02195 ccmC; heme exporter protein C
D DYST_04842; K02194 ccmB; heme exporter protein B
D DYST_04843; K02193 ccmA; heme exporter protein A [EC:7.6.2.5]
D DYST_02059; K07091 lptF; lipopolysaccharide export system permease protein
D DYST_02058; K11720 lptG; lipopolysaccharide export system permease protein
D DYST_04133; K06861 lptB; lipopolysaccharide export system ATP-binding protein [EC:7.5.2.5]
D DYST_02305; K09811 ftsX; cell division transport system permease protein
D DYST_02306; K09812 ftsE; cell division transport system ATP-binding protein
D DYST_04870; K11085 msbA; ATP-binding cassette, subfamily B, bacterial MsbA [EC:7.5.2.6]
D DYST_02212; K13409 cvaB, mchF, raxB; ATP-binding cassette, subfamily B, bacterial CvaB/MchF/RaxB
D DYST_01146; K18893 vcaM; ATP-binding cassette, subfamily B, multidrug efflux pump
D DYST_00658; K02471 bacA, bclA; vitamin B12/bleomycin/antimicrobial peptide transport system ATP-binding/permease protein
C 02060 Phosphotransferase system (PTS) [PATH:ko02060]
D DYST_04126; K08483 ptsI; phosphoenolpyruvate-protein phosphotransferase (PTS system enzyme I) [EC:2.7.3.9]
D DYST_04127; K02784 ptsH; phosphocarrier protein HPr
D DYST_04128; K02793 manXa; mannose PTS system EIIA component [EC:2.7.1.191]
C 03070 Bacterial secretion system [PATH:ko03070]
D DYST_02434; K12340 tolC, bepC, cyaE, raxC, sapF, rsaF, hasF; outer membrane protein
D DYST_00167; K02453 gspD; general secretion pathway protein D
D DYST_03387; K02453 gspD; general secretion pathway protein D
D DYST_03378; K02455 gspF; general secretion pathway protein F
D DYST_00159; K02456 gspG; general secretion pathway protein G
D DYST_03379; K02456 gspG; general secretion pathway protein G
D DYST_00160; K02457 gspH; general secretion pathway protein H
D DYST_03380; K02457 gspH; general secretion pathway protein H
D DYST_00156; K02454 gspE; general secretion pathway protein E [EC:7.4.2.8]
D DYST_02955; K02454 gspE; general secretion pathway protein E [EC:7.4.2.8]
D DYST_03377; K02454 gspE; general secretion pathway protein E [EC:7.4.2.8]
D DYST_01856; K03072 secD; preprotein translocase subunit SecD
D DYST_01854; K03074 secF; preprotein translocase subunit SecF
D DYST_00275; K03075 secG; preprotein translocase subunit SecG
D DYST_04440; K03076 secY; preprotein translocase subunit SecY
D DYST_01857; K03210 yajC; preprotein translocase subunit YajC
D DYST_03094; K03217 yidC, spoIIIJ, OXA1, ccfA; YidC/Oxa1 family membrane protein insertase
D DYST_03904; K03070 secA; preprotein translocase subunit SecA [EC:7.4.2.8]
D DYST_04168; K03110 ftsY; fused signal recognition particle receptor
D DYST_02799; K03071 secB; preprotein translocase subunit SecB
D DYST_01702; K03106 SRP54, ffh; signal recognition particle subunit SRP54 [EC:3.6.5.4]
D DYST_02552; K03118 tatC; sec-independent protein translocase protein TatC
D DYST_03880; K03204 virB9, lvhB9; type IV secretion system protein VirB9
D DYST_03881; K03203 virB8, lvhB8; type IV secretion system protein VirB8
D DYST_03879; K03195 virB10, lvhB10; type IV secretion system protein VirB10
D DYST_03873; K03199 virB4, lvhB4; type IV secretion system protein VirB4 [EC:7.4.2.8]
D DYST_03878; K03196 virB11, lvhB11; type IV secretion system protein VirB11 [EC:7.4.2.8]
D DYST_00180; K03205 virD4, lvhD4; type IV secretion system protein VirD4 [EC:7.4.2.8]
D DYST_03865; K03205 virD4, lvhD4; type IV secretion system protein VirD4 [EC:7.4.2.8]
D DYST_00483; K11904 vgrG; type VI secretion system secreted protein VgrG
D DYST_00716; K11904 vgrG; type VI secretion system secreted protein VgrG
D DYST_00725; K11903 hcp; type VI secretion system secreted protein Hcp
D DYST_03606; K11903 hcp; type VI secretion system secreted protein Hcp
D DYST_03602; K11906 vasD, lip; type VI secretion system protein VasD
D DYST_00709; K11891 impL, vasK, icmF; type VI secretion system protein ImpL
D DYST_00710; K11892 impK, ompA, vasF, dotU; type VI secretion system protein ImpK
D DYST_00720; K11907 vasG, clpV; type VI secretion system protein VasG
D DYST_03594; K11907 vasG, clpV; type VI secretion system protein VasG
D DYST_00707; K11915 stp1, pppA; serine/threonine protein phosphatase Stp1 [EC:3.1.3.16]
B
B 09132 Signal transduction
C 02020 Two-component system [PATH:ko02020]
D DYST_04598; K07636 phoR; two-component system, OmpR family, phosphate regulon sensor histidine kinase PhoR [EC:2.7.13.3]
D DYST_04599; K07657 phoB; two-component system, OmpR family, phosphate regulon response regulator PhoB
D DYST_01498; K07658 phoB1, phoP; two-component system, OmpR family, alkaline phosphatase synthesis response regulator PhoP
D DYST_02727; K01077 E3.1.3.1, phoA, phoB; alkaline phosphatase [EC:3.1.3.1]
D DYST_01255; K02040 pstS; phosphate transport system substrate-binding protein
D DYST_02373; K02040 pstS; phosphate transport system substrate-binding protein
D DYST_02195; K07637 phoQ; two-component system, OmpR family, sensor histidine kinase PhoQ [EC:2.7.13.3]
D DYST_02196; K07660 phoP; two-component system, OmpR family, response regulator PhoP
D DYST_00534; K09474 phoN; acid phosphatase (class A) [EC:3.1.3.2]
D DYST_03456; K09474 phoN; acid phosphatase (class A) [EC:3.1.3.2]
D DYST_01177; K07662 cpxR; two-component system, OmpR family, response regulator CpxR
D DYST_00871; K04771 degP, htrA; serine protease Do [EC:3.4.21.107]
D DYST_02372; K04771 degP, htrA; serine protease Do [EC:3.4.21.107]
D DYST_01460; K07799 mdtA; membrane fusion protein, multidrug efflux system
D DYST_03359; K07799 mdtA; membrane fusion protein, multidrug efflux system
D DYST_01461; K07788 mdtB; multidrug efflux pump
D DYST_03360; K07788 mdtB; multidrug efflux pump
D DYST_01814; K07771 basR; two-component system, OmpR family, response regulator BasR
D DYST_03524; K07771 basR; two-component system, OmpR family, response regulator BasR
D DYST_01194; K07644 cusS, copS, silS; two-component system, OmpR family, heavy metal sensor histidine kinase CusS [EC:2.7.13.3]
D DYST_00138; K07798 cusB, silB; membrane fusion protein, copper/silver efflux system
D DYST_00139; K07787 cusA, silA; copper/silver efflux system protein
D DYST_00345; K07645 qseC; two-component system, OmpR family, sensor histidine kinase QseC [EC:2.7.13.3]
D DYST_01246; K07645 qseC; two-component system, OmpR family, sensor histidine kinase QseC [EC:2.7.13.3]
D DYST_01815; K07645 qseC; two-component system, OmpR family, sensor histidine kinase QseC [EC:2.7.13.3]
D DYST_02622; K07645 qseC; two-component system, OmpR family, sensor histidine kinase QseC [EC:2.7.13.3]
D DYST_03425; K07645 qseC; two-component system, OmpR family, sensor histidine kinase QseC [EC:2.7.13.3]
D DYST_00344; K07666 qseB; two-component system, OmpR family, response regulator QseB
D DYST_01245; K07666 qseB; two-component system, OmpR family, response regulator QseB
D DYST_02621; K07666 qseB; two-component system, OmpR family, response regulator QseB
D DYST_03424; K07666 qseB; two-component system, OmpR family, response regulator QseB
D DYST_04298; K02406 fliC, hag; flagellin
D DYST_04324; K02405 fliA, whiG; RNA polymerase sigma factor FliA
D DYST_01490; K02556 motA; chemotaxis protein MotA
D DYST_04328; K02556 motA; chemotaxis protein MotA
D DYST_03928; K07646 kdpD; two-component system, OmpR family, sensor histidine kinase KdpD [EC:2.7.13.3]
D DYST_03929; K07667 kdpE; two-component system, OmpR family, KDP operon response regulator KdpE
D DYST_03947; K07667 kdpE; two-component system, OmpR family, KDP operon response regulator KdpE
D DYST_03923; K01546 kdpA; potassium-transporting ATPase potassium-binding subunit
D DYST_03924; K01547 kdpB; potassium-transporting ATPase ATP-binding subunit [EC:7.2.2.6]
D DYST_03927; K01548 kdpC; potassium-transporting ATPase KdpC subunit
D DYST_02062; K07648 arcB; two-component system, OmpR family, aerobic respiration control sensor histidine kinase ArcB [EC:2.7.13.3]
D DYST_03523; K07649 tctE; two-component system, OmpR family, sensor histidine kinase TctE [EC:2.7.13.3]
D DYST_03467; K02259 COX15, ctaA; heme a synthase [EC:1.17.99.9]
D DYST_01499; K07654 mtrB; two-component system, OmpR family, sensor histidine kinase MtrB [EC:2.7.13.3]
D DYST_03091; K02313 dnaA; chromosomal replication initiator protein
D DYST_00983; K07785 nrsD, nreB; MFS transporter, NRE family, putaive nickel resistance protein
D DYST_04195; K14205 mprF, fmtC; phosphatidylglycerol lysyltransferase [EC:2.3.2.3]
D DYST_03657; K14980 chvG; two-component system, OmpR family, sensor histidine kinase ChvG [EC:2.7.13.3]
D DYST_03655; K14981 chvI; two-component system, OmpR family, response regulator ChvI
D DYST_01377; K18072 parS; two-component system, OmpR family, sensor kinase ParS [EC:2.7.13.3]
D DYST_01376; K18073 parR; two-component system, OmpR family, response regulator ParR
D DYST_03665; K08641 vanX; zinc D-Ala-D-Ala dipeptidase [EC:3.4.13.22]
D DYST_02533; K19611 fepA, pfeA, iroN, pirA; ferric enterobactin receptor
D DYST_04689; K19611 fepA, pfeA, iroN, pirA; ferric enterobactin receptor
D DYST_03038; K07705 lytT, lytR; two-component system, LytTR family, response regulator LytT
D DYST_03144; K08082 algZ; two-component system, LytTR family, sensor histidine kinase AlgZ [EC:2.7.13.3]
D DYST_03143; K08083 algR; two-component system, LytTR family, response regulator AlgR
D DYST_02563; K09697 natA; sodium transport system ATP-binding protein [EC:7.2.2.4]
D DYST_02562; K09696 natB; sodium transport system permease protein
D DYST_00469; K07674 narQ; two-component system, NarL family, nitrate/nitrite sensor histidine kinase NarQ [EC:2.7.13.3]
D DYST_00095; K07675 uhpB; two-component system, NarL family, sensor histidine kinase UhpB [EC:2.7.13.3]
D DYST_00096; K07686 uhpA; two-component system, NarL family, uhpT operon response regulator UhpA
D DYST_02315; K07677 rcsC; two-component system, NarL family, capsular synthesis sensor histidine kinase RcsC [EC:2.7.13.3]
D DYST_00416; K07687 rcsB; two-component system, NarL family, captular synthesis response regulator RcsB
D DYST_00756; K07687 rcsB; two-component system, NarL family, captular synthesis response regulator RcsB
D DYST_02314; K07687 rcsB; two-component system, NarL family, captular synthesis response regulator RcsB
D DYST_00215; K07689 uvrY, gacA, varA; two-component system, NarL family, invasion response regulator UvrY
D DYST_04590; K03563 csrA; carbon storage regulator
D DYST_00241; K07688 fimZ; two-component system, NarL family, response regulator, fimbrial Z protein, FimZ
D DYST_01909; K07778 desK; two-component system, NarL family, sensor histidine kinase DesK [EC:2.7.13.3]
D DYST_01908; K07693 desR; two-component system, NarL family, response regulator DesR
D DYST_00240; K11617 liaS; two-component system, NarL family, sensor histidine kinase LiaS [EC:2.7.13.3]
D DYST_00470; K11618 liaR; two-component system, NarL family, response regulator LiaR
D DYST_04493; K00990 glnD; [protein-PII] uridylyltransferase [EC:2.7.7.59]
D DYST_01845; K04751 glnB; nitrogen regulatory protein P-II 1
D DYST_03277; K04751 glnB; nitrogen regulatory protein P-II 1
D DYST_03004; K07708 glnL, ntrB; two-component system, NtrC family, nitrogen regulation sensor histidine kinase GlnL [EC:2.7.13.3]
D DYST_03003; K07712 glnG, ntrC; two-component system, NtrC family, nitrogen regulation response regulator GlnG
D DYST_03025; K01915 glnA, GLUL; glutamine synthetase [EC:6.3.1.2]
D DYST_04258; K13598 ntrY; two-component system, NtrC family, nitrogen regulation sensor histidine kinase NtrY [EC:2.7.13.3]
D DYST_04256; K07714 atoC; two-component system, NtrC family, response regulator AtoC
D DYST_03810; K02106 atoE; short-chain fatty acids transporter
D DYST_01616; K00626 ACAT, atoB; acetyl-CoA C-acetyltransferase [EC:2.3.1.9]
D DYST_02999; K00626 ACAT, atoB; acetyl-CoA C-acetyltransferase [EC:2.3.1.9]
D DYST_03984; K02668 pilS, pehS; two-component system, NtrC family, sensor histidine kinase PilS [EC:2.7.13.3]
D DYST_03976; K02667 pilR, pehR; two-component system, NtrC family, response regulator PilR
D DYST_04132; K03092 rpoN; RNA polymerase sigma-54 factor
D DYST_01979; K02650 pilA; type IV pilus assembly protein PilA
D DYST_01444; K00575 cheR; chemotaxis protein methyltransferase CheR [EC:2.1.1.80]
D DYST_02084; K00575 cheR; chemotaxis protein methyltransferase CheR [EC:2.1.1.80]
D DYST_04343; K00575 cheR; chemotaxis protein methyltransferase CheR [EC:2.1.1.80]
D DYST_01445; K03406 mcp; methyl-accepting chemotaxis protein
D DYST_04342; K03406 mcp; methyl-accepting chemotaxis protein
D DYST_04346; K03406 mcp; methyl-accepting chemotaxis protein
D DYST_04340; K05875 tar; methyl-accepting chemotaxis protein II, aspartate sensor receptor
D DYST_02321; K05877 tap; methyl-accepting chemotaxis protein IV, peptide sensor receptor
D DYST_04330; K03408 cheW; purine-binding chemotaxis protein CheW
D DYST_04341; K03408 cheW; purine-binding chemotaxis protein CheW
D DYST_04327; K03407 cheA; two-component system, chemotaxis family, sensor kinase CheA [EC:2.7.13.3]
D DYST_04339; K03407 cheA; two-component system, chemotaxis family, sensor kinase CheA [EC:2.7.13.3]
D DYST_04325; K03413 cheY; two-component system, chemotaxis family, chemotaxis protein CheY
D DYST_04338; K03413 cheY; two-component system, chemotaxis family, chemotaxis protein CheY
D DYST_04345; K03412 cheB; two-component system, chemotaxis family, protein-glutamate methylesterase/glutaminase [EC:3.1.1.61 3.5.1.44]
D DYST_04287; K03415 cheV; two-component system, chemotaxis family, chemotaxis protein CheV
D DYST_02034; K02660 pilJ; twitching motility protein PilJ
D DYST_02035; K02659 pilI; twitching motility protein PilI
D DYST_02033; K06596 chpA; chemosensory pili system protein ChpA (sensor histidine kinase/response regulator)
D DYST_02037; K02657 pilG; twitching motility two-component system response regulator PilG
D DYST_00019; K02658 pilH; twitching motility two-component system response regulator PilH
D DYST_02036; K02658 pilH; twitching motility two-component system response regulator PilH
D DYST_02032; K06597 chpB; chemosensory pili system protein ChpB (putative protein-glutamate methylesterase)
D DYST_02031; K06598 chpC; chemosensory pili system protein ChpC
D DYST_01472; K11444 wspR; two-component system, chemotaxis family, response regulator WspR [EC:2.7.7.65]
D DYST_02311; K11444 wspR; two-component system, chemotaxis family, response regulator WspR [EC:2.7.7.65]
D DYST_03973; K11354 cph1; two-component system, chemotaxis family, sensor kinase Cph1 [EC:2.7.13.3]
D DYST_03343; K13587 cckA; two-component system, cell cycle sensor histidine kinase and response regulator CckA [EC:2.7.13.3]
D DYST_00781; K18444 rrp1; two-component system, glycerol uptake and utilization response regulator
D DYST_02086; K18444 rrp1; two-component system, glycerol uptake and utilization response regulator
D DYST_04303; K10941 flrA, fleQ, flaK; sigma-54 dependent transcriptional regulator, flagellar regulatory protein
D DYST_00789; K10914 crp; CRP/FNR family transcriptional regulator, cyclic AMP receptor protein
D DYST_03681; K10914 crp; CRP/FNR family transcriptional regulator, cyclic AMP receptor protein
D DYST_01396; K01425 glsA, GLS; glutaminase [EC:3.5.1.2]
D DYST_01652; K07718 yesM; two-component system, sensor histidine kinase YesM [EC:2.7.13.3]
D DYST_02009; K15011 regB, regS, actS; two-component system, sensor histidine kinase RegB [EC:2.7.13.3]
D DYST_02010; K15012 regA, regR, actR; two-component system, response regulator RegA
D DYST_01963; K00411 UQCRFS1, RIP1, petA; ubiquinol-cytochrome c reductase iron-sulfur subunit [EC:7.1.1.8]
D DYST_01962; K00412 CYTB, petB; ubiquinol-cytochrome c reductase cytochrome b subunit
D DYST_01961; K00413 CYC1, CYT1, petC; ubiquinol-cytochrome c reductase cytochrome c1 subunit
D DYST_00637; K08738 CYC; cytochrome c
D DYST_03830; K00404 ccoN; cytochrome c oxidase cbb3-type subunit I [EC:7.1.1.9]
D DYST_03831; K00405 ccoO; cytochrome c oxidase cbb3-type subunit II
D DYST_03833; K00406 ccoP; cytochrome c oxidase cbb3-type subunit III
D DYST_03701; K00425 cydA; cytochrome bd ubiquinol oxidase subunit I [EC:7.1.1.7]
D DYST_03700; K00426 cydB; cytochrome bd ubiquinol oxidase subunit II [EC:7.1.1.7]
D DYST_02434; K12340 tolC, bepC, cyaE, raxC, sapF, rsaF, hasF; outer membrane protein
D DYST_00951; K01991 wza, gfcE; polysaccharide biosynthesis/export protein
D DYST_00426; K25307 wzb, etp; low molecular weight protein-tyrosine phosphatase [EC:3.1.3.48]
D DYST_00949; K16692 etk-wzc; tyrosine-protein kinase Etk/Wzc [EC:2.7.10.-]
D DYST_01988; K01791 wecB; UDP-N-acetylglucosamine 2-epimerase (non-hydrolysing) [EC:5.1.3.14]
D DYST_03012; K23514 fecI, prhI; RNA polymerase sigma-19 factor, ECF subfamily
D DYST_02452; K07165 fecR; transmembrane sensor
D DYST_03010; K07165 fecR; transmembrane sensor
D DYST_00755; K20973 sagS; two-component system, sensor histidine kinase SagS [EC:2.7.13.3]
D DYST_04347; K20978 hsbA; HptB-dependent secretion and biofilm anti anti-sigma factor
C 04010 MAPK signaling pathway [PATH:ko04010]
C 04013 MAPK signaling pathway - fly [PATH:ko04013]
D DYST_01951; K04564 SOD2; superoxide dismutase, Fe-Mn family [EC:1.15.1.1]
C 04016 MAPK signaling pathway - plant [PATH:ko04016]
D DYST_00441; K00940 ndk, NME; nucleoside-diphosphate kinase [EC:2.7.4.6]
D DYST_01112; K17686 copA, ctpA, ATP7; P-type Cu+ transporter [EC:7.2.2.8]
D DYST_01140; K03781 katE, CAT, catB, srpA; catalase [EC:1.11.1.6]
C 04011 MAPK signaling pathway - yeast [PATH:ko04011]
D DYST_01140; K03781 katE, CAT, catB, srpA; catalase [EC:1.11.1.6]
C 04012 ErbB signaling pathway [PATH:ko04012]
C 04014 Ras signaling pathway [PATH:ko04014]
C 04015 Rap1 signaling pathway [PATH:ko04015]
C 04310 Wnt signaling pathway [PATH:ko04310]
C 04330 Notch signaling pathway [PATH:ko04330]
C 04340 Hedgehog signaling pathway [PATH:ko04340]
C 04341 Hedgehog signaling pathway - fly [PATH:ko04341]
C 04350 TGF-beta signaling pathway [PATH:ko04350]
C 04390 Hippo signaling pathway [PATH:ko04390]
C 04391 Hippo signaling pathway - fly [PATH:ko04391]
C 04392 Hippo signaling pathway - multiple species [PATH:ko04392]
C 04370 VEGF signaling pathway [PATH:ko04370]
C 04371 Apelin signaling pathway [PATH:ko04371]
C 04630 JAK-STAT signaling pathway [PATH:ko04630]
C 04064 NF-kappa B signaling pathway [PATH:ko04064]
C 04668 TNF signaling pathway [PATH:ko04668]
C 04066 HIF-1 signaling pathway [PATH:ko04066]
D DYST_02161; K00134 GAPDH, gapA; glyceraldehyde 3-phosphate dehydrogenase (phosphorylating) [EC:1.2.1.12]
D DYST_02156; K01623 ALDO; fructose-bisphosphate aldolase, class I [EC:4.1.2.13]
D DYST_01031; K01689 ENO, eno; enolase [EC:4.2.1.11]
D DYST_02151; K00927 PGK, pgk; phosphoglycerate kinase [EC:2.7.2.3]
C 04068 FoxO signaling pathway [PATH:ko04068]
D DYST_01140; K03781 katE, CAT, catB, srpA; catalase [EC:1.11.1.6]
D DYST_01951; K04564 SOD2; superoxide dismutase, Fe-Mn family [EC:1.15.1.1]
D DYST_02091; K01596 E4.1.1.32, pckA, PCK; phosphoenolpyruvate carboxykinase (GTP) [EC:4.1.1.32]
C 04020 Calcium signaling pathway [PATH:ko04020]
D DYST_00480; K00476 ASPH; aspartate beta-hydroxylase [EC:1.14.11.16]
D DYST_02277; K00476 ASPH; aspartate beta-hydroxylase [EC:1.14.11.16]
C 04070 Phosphatidylinositol signaling system [PATH:ko04070]
D DYST_04146; K01092 E3.1.3.25, IMPA, suhB; myo-inositol-1(or 4)-monophosphatase [EC:3.1.3.25]
D DYST_02007; K00901 dgkA, DGK; diacylglycerol kinase (ATP) [EC:2.7.1.107]
D DYST_04484; K00981 E2.7.7.41, CDS1, CDS2, cdsA; phosphatidate cytidylyltransferase [EC:2.7.7.41]
C 04072 Phospholipase D signaling pathway [PATH:ko04072]
D DYST_02007; K00901 dgkA, DGK; diacylglycerol kinase (ATP) [EC:2.7.1.107]
C 04071 Sphingolipid signaling pathway [PATH:ko04071]
C 04024 cAMP signaling pathway [PATH:ko04024]
C 04022 cGMP-PKG signaling pathway [PATH:ko04022]
C 04151 PI3K-Akt signaling pathway [PATH:ko04151]
D DYST_04575; K04079 HSP90A, htpG; molecular chaperone HtpG
D DYST_02091; K01596 E4.1.1.32, pckA, PCK; phosphoenolpyruvate carboxykinase (GTP) [EC:4.1.1.32]
C 04152 AMPK signaling pathway [PATH:ko04152]
D DYST_03067; K03841 FBP, fbp; fructose-1,6-bisphosphatase I [EC:3.1.3.11]
D DYST_02091; K01596 E4.1.1.32, pckA, PCK; phosphoenolpyruvate carboxykinase (GTP) [EC:4.1.1.32]
D DYST_00468; K03234 EEF2; elongation factor 2
D DYST_02804; K00507 SCD, desC; stearoyl-CoA desaturase (Delta-9 desaturase) [EC:1.14.19.1]
C 04150 mTOR signaling pathway [PATH:ko04150]
D DYST_03643; K13780 SLC7A5, LAT1; solute carrier family 7 (L-type amino acid transporter), member 5
D DYST_04082; K13780 SLC7A5, LAT1; solute carrier family 7 (L-type amino acid transporter), member 5
C 04075 Plant hormone signal transduction [PATH:ko04075]
B
B 09133 Signaling molecules and interaction
C 04080 Neuroactive ligand-receptor interaction [PATH:ko04080]
C 04060 Cytokine-cytokine receptor interaction [PATH:ko04060]
C 04061 Viral protein interaction with cytokine and cytokine receptor [PATH:ko04061]
C 04512 ECM-receptor interaction [PATH:ko04512]
C 04514 Cell adhesion molecules [PATH:ko04514]

## Sheet: Level 1-Organismal Systems
Level 1 KEGG Annotations for Organismal Systems
A09150 Organismal Systems
B
B 09151 Immune system
C 04640 Hematopoietic cell lineage [PATH:ko04640]
C 04610 Complement and coagulation cascades [PATH:ko04610]
C 04611 Platelet activation [PATH:ko04611]
C 04613 Neutrophil extracellular trap formation [PATH:ko04613]
C 04620 Toll-like receptor signaling pathway [PATH:ko04620]
C 04624 Toll and Imd signaling pathway [PATH:ko04624]
D DYST_03444; K10380 ANK; ankyrin
C 04621 NOD-like receptor signaling pathway [PATH:ko04621]
D DYST_02308; K03671 trxA; thioredoxin 1
D DYST_04575; K04079 HSP90A, htpG; molecular chaperone HtpG
D DYST_04298; K02406 fliC, hag; flagellin
C 04622 RIG-I-like receptor signaling pathway [PATH:ko04622]
C 04623 Cytosolic DNA-sensing pathway [PATH:ko04623]
C 04625 C-type lectin receptor signaling pathway [PATH:ko04625]
C 04650 Natural killer cell mediated cytotoxicity [PATH:ko04650]
C 04612 Antigen processing and presentation [PATH:ko04612]
D DYST_04575; K04079 HSP90A, htpG; molecular chaperone HtpG
C 04660 T cell receptor signaling pathway [PATH:ko04660]
C 04658 Th1 and Th2 cell differentiation [PATH:ko04658]
C 04659 Th17 cell differentiation [PATH:ko04659]
D DYST_04575; K04079 HSP90A, htpG; molecular chaperone HtpG
C 04657 IL-17 signaling pathway [PATH:ko04657]
D DYST_04575; K04079 HSP90A, htpG; molecular chaperone HtpG
C 04662 B cell receptor signaling pathway [PATH:ko04662]
C 04664 Fc epsilon RI signaling pathway [PATH:ko04664]
C 04666 Fc gamma R-mediated phagocytosis [PATH:ko04666]
C 04670 Leukocyte transendothelial migration [PATH:ko04670]
C 04672 Intestinal immune network for IgA production [PATH:ko04672]
C 04062 Chemokine signaling pathway [PATH:ko04062]
B
B 09152 Endocrine system
C 04911 Insulin secretion [PATH:ko04911]
C 04910 Insulin signaling pathway [PATH:ko04910]
D DYST_03067; K03841 FBP, fbp; fructose-1,6-bisphosphatase I [EC:3.1.3.11]
D DYST_02091; K01596 E4.1.1.32, pckA, PCK; phosphoenolpyruvate carboxykinase (GTP) [EC:4.1.1.32]
C 04922 Glucagon signaling pathway [PATH:ko04922]
D DYST_02091; K01596 E4.1.1.32, pckA, PCK; phosphoenolpyruvate carboxykinase (GTP) [EC:4.1.1.32]
D DYST_03067; K03841 FBP, fbp; fructose-1,6-bisphosphatase I [EC:3.1.3.11]
D DYST_03275; K01834 PGAM, gpmA; 2,3-bisphosphoglycerate-dependent phosphoglycerate mutase [EC:5.4.2.11]
D DYST_02158; K00873 PK, pyk; pyruvate kinase [EC:2.7.1.40]
C 04923 Regulation of lipolysis in adipocytes [PATH:ko04923]
D DYST_02780; K01054 MGLL; acylglycerol lipase [EC:3.1.1.23]
C 04920 Adipocytokine signaling pathway [PATH:ko04920]
D DYST_00259; K01897 ACSL, fadD; long-chain acyl-CoA synthetase [EC:6.2.1.3]
D DYST_01081; K01897 ACSL, fadD; long-chain acyl-CoA synthetase [EC:6.2.1.3]
D DYST_02091; K01596 E4.1.1.32, pckA, PCK; phosphoenolpyruvate carboxykinase (GTP) [EC:4.1.1.32]
C 03320 PPAR signaling pathway [PATH:ko03320]
D DYST_03586; K00029 E1.1.1.40, maeB; malate dehydrogenase (oxaloacetate-decarboxylating)(NADP+) [EC:1.1.1.40]
D DYST_02804; K00507 SCD, desC; stearoyl-CoA desaturase (Delta-9 desaturase) [EC:1.14.19.1]
D DYST_00113; K08762 DBI, ACBP; diazepam-binding inhibitor (GABA receptor modulator, acyl-CoA-binding protein)
D DYST_00259; K01897 ACSL, fadD; long-chain acyl-CoA synthetase [EC:6.2.1.3]
D DYST_01081; K01897 ACSL, fadD; long-chain acyl-CoA synthetase [EC:6.2.1.3]
D DYST_01083; K08764 SCP2, SCPX; sterol carrier protein 2 [EC:2.3.1.176]
D DYST_04056; K00249 ACADM, acd; acyl-CoA dehydrogenase [EC:1.3.8.7]
D DYST_04373; K00249 ACADM, acd; acyl-CoA dehydrogenase [EC:1.3.8.7]
D DYST_02252; K08770 UBC; ubiquitin C
D DYST_02091; K01596 E4.1.1.32, pckA, PCK; phosphoenolpyruvate carboxykinase (GTP) [EC:4.1.1.32]
D DYST_02394; K00864 glpK, GK; glycerol kinase [EC:2.7.1.30]
C 04929 GnRH secretion [PATH:ko04929]
C 04912 GnRH signaling pathway [PATH:ko04912]
C 04913 Ovarian steroidogenesis [PATH:ko04913]
C 04915 Estrogen signaling pathway [PATH:ko04915]
D DYST_04575; K04079 HSP90A, htpG; molecular chaperone HtpG
C 04914 Progesterone-mediated oocyte maturation [PATH:ko04914]
D DYST_04575; K04079 HSP90A, htpG; molecular chaperone HtpG
D DYST_00595; K03350 APC3, CDC27; anaphase-promoting complex subunit 3
C 04917 Prolactin signaling pathway [PATH:ko04917]
C 04921 Oxytocin signaling pathway [PATH:ko04921]
D DYST_00468; K03234 EEF2; elongation factor 2
C 04926 Relaxin signaling pathway [PATH:ko04926]
C 04935 Growth hormone synthesis, secretion and action [PATH:ko04935]
C 04918 Thyroid hormone synthesis [PATH:ko04918]
D DYST_04555; K00432 gpx, btuE, bsaA; glutathione peroxidase [EC:1.11.1.9]
D DYST_01725; K00383 GSR, gor; glutathione reductase (NADPH) [EC:1.8.1.7]
C 04919 Thyroid hormone signaling pathway [PATH:ko04919]
D DYST_03042; K01114 plc; phospholipase C [EC:3.1.4.3]
C 04928 Parathyroid hormone synthesis, secretion and action [PATH:ko04928]
C 04916 Melanogenesis [PATH:ko04916]
C 04924 Renin secretion [PATH:ko04924]
C 04614 Renin-angiotensin system [PATH:ko04614]
D DYST_02424; K01322 PREP; prolyl oligopeptidase [EC:3.4.21.26]
D DYST_02425; K01322 PREP; prolyl oligopeptidase [EC:3.4.21.26]
C 04925 Aldosterone synthesis and secretion [PATH:ko04925]
C 04927 Cortisol synthesis and secretion [PATH:ko04927]
B
B
C 04260 Cardiac muscle contraction [PATH:ko04260]
D DYST_00480; K00476 ASPH; aspartate beta-hydroxylase [EC:1.14.11.16]
D DYST_02277; K00476 ASPH; aspartate beta-hydroxylase [EC:1.14.11.16]
D DYST_01963; K00411 UQCRFS1, RIP1, petA; ubiquinol-cytochrome c reductase iron-sulfur subunit [EC:7.1.1.8]
D DYST_01962; K00412 CYTB, petB; ubiquinol-cytochrome c reductase cytochrome b subunit
D DYST_01961; K00413 CYC1, CYT1, petC; ubiquinol-cytochrome c reductase cytochrome c1 subunit
C 04261 Adrenergic signaling in cardiomyocytes [PATH:ko04261]
C 04270 Vascular smooth muscle contraction [PATH:ko04270]
B
B 09154 Digestive system
C 04970 Salivary secretion [PATH:ko04970]
D DYST_02495; K01176 AMY, amyA, malS; alpha-amylase [EC:3.2.1.1]
C 04971 Gastric acid secretion [PATH:ko04971]
C 04972 Pancreatic secretion [PATH:ko04972]
D DYST_02495; K01176 AMY, amyA, malS; alpha-amylase [EC:3.2.1.1]
C 04976 Bile secretion [PATH:ko04976]
C 04973 Carbohydrate digestion and absorption [PATH:ko04973]
D DYST_02495; K01176 AMY, amyA, malS; alpha-amylase [EC:3.2.1.1]
C 04974 Protein digestion and absorption [PATH:ko04974]
D DYST_03102; K01278 DPP4, CD26; dipeptidyl-peptidase 4 [EC:3.4.14.5]
C 04975 Fat digestion and absorption [PATH:ko04975]
D DYST_01616; K00626 ACAT, atoB; acetyl-CoA C-acetyltransferase [EC:2.3.1.9]
D DYST_02999; K00626 ACAT, atoB; acetyl-CoA C-acetyltransferase [EC:2.3.1.9]
C 04979 Cholesterol metabolism [PATH:ko04979]
C 04977 Vitamin digestion and absorption [PATH:ko04977]
C 04978 Mineral absorption [PATH:ko04978]
D DYST_01112; K17686 copA, ctpA, ATP7; P-type Cu+ transporter [EC:7.2.2.8]
B
B 09155 Excretory system
C 04962 Vasopressin-regulated water reabsorption [PATH:ko04962]
C 04960 Aldosterone-regulated sodium reabsorption [PATH:ko04960]
C 04961 Endocrine and other factor-regulated calcium reabsorption [PATH:ko04961]
C 04964 Proximal tubule bicarbonate reclamation [PATH:ko04964]
D DYST_01396; K01425 glsA, GLS; glutaminase [EC:3.5.1.2]
D DYST_02091; K01596 E4.1.1.32, pckA, PCK; phosphoenolpyruvate carboxykinase (GTP) [EC:4.1.1.32]
C 04966 Collecting duct acid secretion [PATH:ko04966]
B
B 09156 Nervous system
C 04724 Glutamatergic synapse [PATH:ko04724]
D DYST_01396; K01425 glsA, GLS; glutaminase [EC:3.5.1.2]
D DYST_03025; K01915 glnA, GLUL; glutamine synthetase [EC:6.3.1.2]
C 04727 GABAergic synapse [PATH:ko04727]
D DYST_01396; K01425 glsA, GLS; glutaminase [EC:3.5.1.2]
D DYST_03025; K01915 glnA, GLUL; glutamine synthetase [EC:6.3.1.2]
C 04725 Cholinergic synapse [PATH:ko04725]
C 04728 Dopaminergic synapse [PATH:ko04728]
D DYST_01839; K01593 DDC, TDC; aromatic-L-amino-acid/L-tryptophan decarboxylase [EC:4.1.1.28 4.1.1.105]
C 04726 Serotonergic synapse [PATH:ko04726]
D DYST_01839; K01593 DDC, TDC; aromatic-L-amino-acid/L-tryptophan decarboxylase [EC:4.1.1.28 4.1.1.105]
C 04720 Long-term potentiation [PATH:ko04720]
C 04730 Long-term depression [PATH:ko04730]
C 04723 Retrograde endocannabinoid signaling [PATH:ko04723]
D DYST_02780; K01054 MGLL; acylglycerol lipase [EC:3.1.1.23]
D DYST_03493; K03953 NDUFA9; NADH dehydrogenase (ubiquinone) 1 alpha subcomplex subunit 9
C 04721 Synaptic vesicle cycle [PATH:ko04721]
C 04722 Neurotrophin signaling pathway [PATH:ko04722]
B
B 09157 Sensory system
C 04744 Phototransduction [PATH:ko04744]
C 04745 Phototransduction - fly [PATH:ko04745]
C 04740 Olfactory transduction [PATH:ko04740]
C 04742 Taste transduction [PATH:ko04742]
C 04750 Inflammatory mediator regulation of TRP channels [PATH:ko04750]
B
B 09158 Development and regeneration
C 04320 Dorso-ventral axis formation [PATH:ko04320]
C 04360 Axon guidance [PATH:ko04360]
C 04361 Axon regeneration [PATH:ko04361]
D DYST_02007; K00901 dgkA, DGK; diacylglycerol kinase (ATP) [EC:2.7.1.107]
D DYST_01839; K01593 DDC, TDC; aromatic-L-amino-acid/L-tryptophan decarboxylase [EC:4.1.1.28 4.1.1.105]
C 04380 Osteoclast differentiation [PATH:ko04380]
B
B 09149 Aging
C 04211 Longevity regulating pathway [PATH:ko04211]
D DYST_01951; K04564 SOD2; superoxide dismutase, Fe-Mn family [EC:1.15.1.1]
D DYST_01140; K03781 katE, CAT, catB, srpA; catalase [EC:1.11.1.6]
C 04212 Longevity regulating pathway - worm [PATH:ko04212]
D DYST_01951; K04564 SOD2; superoxide dismutase, Fe-Mn family [EC:1.15.1.1]
D DYST_01140; K03781 katE, CAT, catB, srpA; catalase [EC:1.11.1.6]
D DYST_00036; K00799 GST, gst; glutathione S-transferase [EC:2.5.1.18]
D DYST_01328; K00799 GST, gst; glutathione S-transferase [EC:2.5.1.18]
D DYST_01586; K00799 GST, gst; glutathione S-transferase [EC:2.5.1.18]
D DYST_01590; K00799 GST, gst; glutathione S-transferase [EC:2.5.1.18]
D DYST_01750; K00799 GST, gst; glutathione S-transferase [EC:2.5.1.18]
D DYST_02487; K00799 GST, gst; glutathione S-transferase [EC:2.5.1.18]
D DYST_02588; K00799 GST, gst; glutathione S-transferase [EC:2.5.1.18]
D DYST_02610; K00799 GST, gst; glutathione S-transferase [EC:2.5.1.18]
D DYST_02651; K00799 GST, gst; glutathione S-transferase [EC:2.5.1.18]
D DYST_02826; K00799 GST, gst; glutathione S-transferase [EC:2.5.1.18]
D DYST_03063; K00799 GST, gst; glutathione S-transferase [EC:2.5.1.18]
D DYST_03845; K00799 GST, gst; glutathione S-transferase [EC:2.5.1.18]
D DYST_02804; K00507 SCD, desC; stearoyl-CoA desaturase (Delta-9 desaturase) [EC:1.14.19.1]
D DYST_00904; K01358 clpP, CLPP; ATP-dependent Clp protease, protease subunit [EC:3.4.21.92]
D DYST_00100; K04043 dnaK, HSPA9; molecular chaperone DnaK
D DYST_02457; K04077 groEL, HSPD1; chaperonin GroEL
C 04213 Longevity regulating pathway - multiple species [PATH:ko04213]
D DYST_01951; K04564 SOD2; superoxide dismutase, Fe-Mn family [EC:1.15.1.1]
D DYST_01140; K03781 katE, CAT, catB, srpA; catalase [EC:1.11.1.6]
D DYST_04002; K03695 clpB; ATP-dependent Clp protease ATP-binding subunit ClpB
B
B 09159 Environmental adaptation
C 04710 Circadian rhythm [PATH:ko04710]
C 04713 Circadian entrainment [PATH:ko04713]
C 04711 Circadian rhythm - fly [PATH:ko04711]
C 04712 Circadian rhythm - plant [PATH:ko04712]
C 04714 Thermogenesis [PATH:ko04714]
D DYST_02780; K01054 MGLL; acylglycerol lipase [EC:3.1.1.23]
D DYST_00259; K01897 ACSL, fadD; long-chain acyl-CoA synthetase [EC:6.2.1.3]
D DYST_01081; K01897 ACSL, fadD; long-chain acyl-CoA synthetase [EC:6.2.1.3]
D DYST_03493; K03953 NDUFA9; NADH dehydrogenase (ubiquinone) 1 alpha subcomplex subunit 9
D DYST_01963; K00411 UQCRFS1, RIP1, petA; ubiquinol-cytochrome c reductase iron-sulfur subunit [EC:7.1.1.8]
D DYST_01962; K00412 CYTB, petB; ubiquinol-cytochrome c reductase cytochrome b subunit
D DYST_01961; K00413 CYC1, CYT1, petC; ubiquinol-cytochrome c reductase cytochrome c1 subunit
D DYST_03468; K02257 COX10, ctaB, cyoE; heme o synthase [EC:2.5.1.141]
D DYST_03467; K02259 COX15, ctaA; heme a synthase [EC:1.17.99.9]
C 04626 Plant-pathogen interaction [PATH:ko04626]
D DYST_04298; K02406 fliC, hag; flagellin
D DYST_04405; K02358 tuf, TUFM; elongation factor Tu
D DYST_04418; K02358 tuf, TUFM; elongation factor Tu
D DYST_02394; K00864 glpK, GK; glycerol kinase [EC:2.7.1.30]
D DYST_04575; K04079 HSP90A, htpG; molecular chaperone HtpG
D DYST_02213; K13408 cvaA, mchE, raxA; membrane fusion protein
D DYST_02212; K13409 cvaB, mchF, raxB; ATP-binding cassette, subfamily B, bacterial CvaB/MchF/RaxB
D DYST_02434; K12340 tolC, bepC, cyaE, raxC, sapF, rsaF, hasF; outer membrane protein

## Sheet: Level 1- Cellular Processes
Level 1 KEGG Annotations for Cellular Processes
A09140	Cellular	Processes
B
B	9141	Transport	and	catabolism
C	4144	Endocytosis	[PATH:ko04144]
C	4145	Phagosome	[PATH:ko04145]
C	4142	Lysosome	[PATH:ko04142]
D	DYST_03434;	K01279	TPP1,	CLN2;	tripeptidyl-peptidase	I	[EC:3.4.14.9]
D	DYST_02658;	K01201	GBA,	srfJ;	glucosylceramidase	[EC:3.2.1.45]
D	DYST_03022;	K01217	IDUA;	L-iduronidase	[EC:3.2.1.76]
D	DYST_00364;	K01205	NAGLU;	alpha-N-acetylglucosaminidase	[EC:3.2.1.50]
D	DYST_01513;	K01195	uidA,	GUSB;	beta-glucuronidase	[EC:3.2.1.31]
D	DYST_00351;	K01206	FUCA;	alpha-L-fucosidase	[EC:3.2.1.51]
D	DYST_00677;	K01206	FUCA;	alpha-L-fucosidase	[EC:3.2.1.51]
D	DYST_00560;	K12373	HEXA_B;	hexosaminidase	[EC:3.2.1.52]
D	DYST_02840;	K12373	HEXA_B;	hexosaminidase	[EC:3.2.1.52]
D	DYST_03944;	K01192	E3.2.1.25,	MANBA,	manB;	beta-mannosidase	[EC:3.2.1.25]
D	DYST_00854;	K01444	AGA,	aspG;	N4-(beta-N-acetylglucosaminyl)-L-asparaginase	[EC:3.5.1.26]
D	DYST_02839;	K10532	HGSNAT;	heparan-alpha-glucosaminide	N-acetyltransferase	[EC:2.3.1.78]
C	4146	Peroxisome	[PATH:ko04146]
D	DYST_01094;	K01796	E5.1.99.4,	AMACR,	mcr;	alpha-methylacyl-CoA	racemase	[EC:5.1.99.4]
D	DYST_01083;	K08764	SCP2,	SCPX;	sterol	carrier	protein	2	[EC:2.3.1.176]
D	DYST_00259;	K01897	ACSL,	fadD;	long-chain	acyl-CoA	synthetase	[EC:6.2.1.3]
D	DYST_01081;	K01897	ACSL,	fadD;	long-chain	acyl-CoA	synthetase	[EC:6.2.1.3]
D	DYST_03227;	K03426	E3.6.1.22,	NUDT12,	nudC;	NAD+	diphosphatase	[EC:3.6.1.22]
D	DYST_02500;	K00273	DAO,	aao;	D-amino-acid	oxidase	[EC:1.4.3.3]
D	DYST_03364;	K00031	IDH1,	IDH2,	icd;	isocitrate	dehydrogenase	[EC:1.1.1.42]
D	DYST_01651;	K01640	HMGCL,	hmgL;	hydroxymethylglutaryl-CoA	lyase	[EC:4.1.3.4]
D	DYST_01140;	K03781	katE,	CAT,	catB,	srpA;	catalase	[EC:1.11.1.6]
D	DYST_01951;	K04564	SOD2;	superoxide	dismutase,	Fe-Mn	family	[EC:1.15.1.1]
D	DYST_03432;	K08726	EPHX2;	soluble	epoxide	hydrolase	/	lipid-phosphate	phosphatase	[EC:3.3.2.10	3.1.3.76]
C	4140	Autophagy	-	animal	[PATH:ko04140]
C	4138	Autophagy	-	yeast	[PATH:ko04138]
D	DYST_03346;	K01336	E3.4.21.48;	cerevisin	[EC:3.4.21.48]
C	4136	Autophagy	-	other	[PATH:ko04136]
C	4137	Mitophagy	-	animal	[PATH:ko04137]
D	DYST_02252;	K08770	UBC;	ubiquitin	C
C	4139	Mitophagy	-	yeast	[PATH:ko04139]
B
B	9143	Cell	growth	and	death
C	4110	Cell	cycle	[PATH:ko04110]
D	DYST_00595;	K03350	APC3,	CDC27;	anaphase-promoting	complex	subunit	3
C	4111	Cell	cycle	-	yeast	[PATH:ko04111]
D	DYST_00595;	K03350	APC3,	CDC27;	anaphase-promoting	complex	subunit	3
C	4112	Cell	cycle	-	Caulobacter	[PATH:ko04112]
D	DYST_03091;	K02313	dnaA;	chromosomal	replication	initiator	protein
D	DYST_01711;	K02314	dnaB;	replicative	DNA	helicase	[EC:3.6.4.12]
D	DYST_00902;	K01338	lon;	ATP-dependent	Lon	protease	[EC:3.4.21.53]
D	DYST_03900;	K03531	ftsZ;	cell	division	protein	FtsZ
D	DYST_03898;	K03589	ftsQ;	cell	division	protein	FtsQ
D	DYST_03899;	K03590	ftsA;	cell	division	protein	FtsA
D	DYST_03894;	K03588	ftsW,	spoVE;	cell	division	protein	FtsW
D	DYST_03895;	K02563	murG;	UDP-N-acetylglucosamine--N-acetylmuramyl-(pentapeptide)	pyrophosphoryl-undecaprenol	N-acetylglucosamine	transferase	[EC:2.4.1.227]
D	DYST_04482;	K11749	rseP;	regulator	of	sigma	E	protease	[EC:3.4.24.-]
D	DYST_03343;	K13587	cckA;	two-component	system,	cell	cycle	sensor	histidine	kinase	and	response	regulator	CckA	[EC:2.7.13.3]
D	DYST_00903;	K03544	clpX,	CLPX;	ATP-dependent	Clp	protease	ATP-binding	subunit	ClpX
D	DYST_00904;	K01358	clpP,	CLPP;	ATP-dependent	Clp	protease,	protease	subunit	[EC:3.4.21.92]
C	4113	Meiosis	-	yeast	[PATH:ko04113]
D	DYST_02576;	K08139	HXT;	MFS	transporter,	SP	family,	sugar:H+	symporter
D	DYST_00595;	K03350	APC3,	CDC27;	anaphase-promoting	complex	subunit	3
C	4114	Oocyte	meiosis	[PATH:ko04114]
D	DYST_00595;	K03350	APC3,	CDC27;	anaphase-promoting	complex	subunit	3
C	4210	Apoptosis	[PATH:ko04210]
D	DYST_00637;	K08738	CYC;	cytochrome	c
D	DYST_00786;	K01173	ENDOG;	endonuclease	G,	mitochondrial
C	4214	Apoptosis	-	fly	[PATH:ko04214]
D	DYST_00637;	K08738	CYC;	cytochrome	c
C	4215	Apoptosis	-	multiple	species	[PATH:ko04215]
D	DYST_00637;	K08738	CYC;	cytochrome	c
C	4216	Ferroptosis	[PATH:ko04216]
D	DYST_00259;	K01897	ACSL,	fadD;	long-chain	acyl-CoA	synthetase	[EC:6.2.1.3]
D	DYST_01081;	K01897	ACSL,	fadD;	long-chain	acyl-CoA	synthetase	[EC:6.2.1.3]
C	4217	Necroptosis	[PATH:ko04217]
D	DYST_03025;	K01915	glnA,	GLUL;	glutamine	synthetase	[EC:6.3.1.2]
D	DYST_04575;	K04079	HSP90A,	htpG;	molecular	chaperone	HtpG
D	DYST_04595;	K03767	PPIA;	peptidyl-prolyl	cis-trans	isomerase	A	(cyclophilin	A)	[EC:5.2.1.8]
C	4115	p53	signaling	pathway	[PATH:ko04115]
D	DYST_00637;	K08738	CYC;	cytochrome	c
C	4218	Cellular	senescence	[PATH:ko04218]
B
B	9144	Cellular	community	-	eukaryotes
C	4510	Focal	adhesion	[PATH:ko04510]
C	4520	Adherens	junction	[PATH:ko04520]
C	4530	Tight	junction	[PATH:ko04530]
C	4540	Gap	junction	[PATH:ko04540]
C	4550	Signaling	pathways	regulating	pluripotency	of	stem	cells	[PATH:ko04550]
B
B	9145	Cellular	community	-	prokaryotes
C	2024	Quorum	sensing	[PATH:ko02024]
D	DYST_01311;	K03666	hfq;	host	factor-I	protein
D	DYST_03659;	K01657	trpE;	anthranilate	synthase	component	I	[EC:4.1.3.27]
D	DYST_03676;	K01658	trpG;	anthranilate	synthase	component	II	[EC:4.1.3.27]
D	DYST_04448;	K01626	E2.5.1.54,	aroF,	aroG,	aroH;	3-deoxy-7-phosphoheptulonate	synthase	[EC:2.5.1.54]
D	DYST_04536;	K01626	E2.5.1.54,	aroF,	aroG,	aroH;	3-deoxy-7-phosphoheptulonate	synthase	[EC:2.5.1.54]
D	DYST_04544;	K06998	phzF;	trans-2,3-dihydro-3-hydroxyanthranilate	isomerase	[EC:5.3.3.17]
D	DYST_00345;	K07645	qseC;	two-component	system,	OmpR	family,	sensor	histidine	kinase	QseC	[EC:2.7.13.3]
D	DYST_01246;	K07645	qseC;	two-component	system,	OmpR	family,	sensor	histidine	kinase	QseC	[EC:2.7.13.3]
D	DYST_01815;	K07645	qseC;	two-component	system,	OmpR	family,	sensor	histidine	kinase	QseC	[EC:2.7.13.3]
D	DYST_02622;	K07645	qseC;	two-component	system,	OmpR	family,	sensor	histidine	kinase	QseC	[EC:2.7.13.3]
D	DYST_03425;	K07645	qseC;	two-component	system,	OmpR	family,	sensor	histidine	kinase	QseC	[EC:2.7.13.3]
D	DYST_00344;	K07666	qseB;	two-component	system,	OmpR	family,	response	regulator	QseB
D	DYST_01245;	K07666	qseB;	two-component	system,	OmpR	family,	response	regulator	QseB
D	DYST_02621;	K07666	qseB;	two-component	system,	OmpR	family,	response	regulator	QseB
D	DYST_03424;	K07666	qseB;	two-component	system,	OmpR	family,	response	regulator	QseB
D	DYST_03929;	K07667	kdpE;	two-component	system,	OmpR	family,	KDP	operon	response	regulator	KdpE
D	DYST_03947;	K07667	kdpE;	two-component	system,	OmpR	family,	KDP	operon	response	regulator	KdpE
D	DYST_00178;	K20527	trbB;	type	IV	secretion	system	protein	TrbB	[EC:7.4.2.8]
D	DYST_00177;	K20528	trbC;	type	IV	secretion	system	protein	TrbC
D	DYST_00176;	K20529	trbD;	type	IV	secretion	system	protein	TrbD
D	DYST_00175;	K20530	trbE;	type	IV	secretion	system	protein	TrbE	[EC:7.4.2.8]
D	DYST_00174;	K20266	trbJ;	type	IV	secretion	system	protein	TrbJ
D	DYST_00172;	K07344	trbL;	type	IV	secretion	system	protein	TrbL
D	DYST_00171;	K20531	trbF;	type	IV	secretion	system	protein	TrbF
D	DYST_00170;	K20532	trbG;	type	IV	secretion	system	protein	TrbG
D	DYST_00169;	K20533	trbI;	type	IV	secretion	system	protein	TrbI
D	DYST_00259;	K01897	ACSL,	fadD;	long-chain	acyl-CoA	synthetase	[EC:6.2.1.3]
D	DYST_01081;	K01897	ACSL,	fadD;	long-chain	acyl-CoA	synthetase	[EC:6.2.1.3]
D	DYST_00789;	K10914	crp;	CRP/FNR	family	transcriptional	regulator,	cyclic	AMP	receptor	protein
D	DYST_03681;	K10914	crp;	CRP/FNR	family	transcriptional	regulator,	cyclic	AMP	receptor	protein
D	DYST_01191;	K09823	zur;	Fur	family	transcriptional	regulator,	zinc	uptake	regulator
D	DYST_04222;	K11752	ribD;	diaminohydroxyphosphoribosylaminopyrimidine	deaminase	/	5-amino-6-(5-phosphoribosylamino)uracil	reductase	[EC:3.5.4.26	1.1.1.193]
D	DYST_00546;	K09936	TC.BAT2;	bacterial/archaeal	transporter	family-2	protein
D	DYST_01125;	K18139	oprM,	emhC,	ttgC,	cusC,	adeK,	smeF,	mtrE,	cmeC,	gesC;	outer	membrane	protein,	multidrug	efflux	system
D	DYST_03094;	K03217	yidC,	spoIIIJ,	OXA1,	ccfA;	YidC/Oxa1	family	membrane	protein	insertase
D	DYST_02705;	K14645	K14645;	serine	protease	[EC:3.4.21.-]
D	DYST_00275;	K03075	secG;	preprotein	translocase	subunit	SecG
D	DYST_04440;	K03076	secY;	preprotein	translocase	subunit	SecY
D	DYST_01857;	K03210	yajC;	preprotein	translocase	subunit	YajC
D	DYST_03904;	K03070	secA;	preprotein	translocase	subunit	SecA	[EC:7.4.2.8]
D	DYST_04168;	K03110	ftsY;	fused	signal	recognition	particle	receptor
D	DYST_02799;	K03071	secB;	preprotein	translocase	subunit	SecB
D	DYST_01702;	K03106	SRP54,	ffh;	signal	recognition	particle	subunit	SRP54	[EC:3.6.5.4]
D	DYST_03042;	K01114	plc;	phospholipase	C	[EC:3.1.4.3]
C	5111	Biofilm	formation	-	Vibrio	cholerae	[PATH:ko05111]
D	DYST_01311;	K03666	hfq;	host	factor-I	protein
D	DYST_01988;	K01791	wecB;	UDP-N-acetylglucosamine	2-epimerase	(non-hydrolysing)	[EC:5.1.3.14]
D	DYST_01548;	K01912	paaK;	phenylacetate-CoA	ligase	[EC:6.2.1.30]
D	DYST_00167;	K02453	gspD;	general	secretion	pathway	protein	D
D	DYST_03387;	K02453	gspD;	general	secretion	pathway	protein	D
D	DYST_00156;	K02454	gspE;	general	secretion	pathway	protein	E	[EC:7.4.2.8]
D	DYST_02955;	K02454	gspE;	general	secretion	pathway	protein	E	[EC:7.4.2.8]
D	DYST_03377;	K02454	gspE;	general	secretion	pathway	protein	E	[EC:7.4.2.8]
D	DYST_03378;	K02455	gspF;	general	secretion	pathway	protein	F
D	DYST_00159;	K02456	gspG;	general	secretion	pathway	protein	G
D	DYST_03379;	K02456	gspG;	general	secretion	pathway	protein	G
D	DYST_00160;	K02457	gspH;	general	secretion	pathway	protein	H
D	DYST_03380;	K02457	gspH;	general	secretion	pathway	protein	H
D	DYST_00215;	K07689	uvrY,	gacA,	varA;	two-component	system,	NarL	family,	invasion	response	regulator	UvrY
D	DYST_04590;	K03563	csrA;	carbon	storage	regulator
D	DYST_00789;	K10914	crp;	CRP/FNR	family	transcriptional	regulator,	cyclic	AMP	receptor	protein
D	DYST_03681;	K10914	crp;	CRP/FNR	family	transcriptional	regulator,	cyclic	AMP	receptor	protein
D	DYST_02481;	K03557	fis;	Fis	family	transcriptional	regulator,	factor	for	inversion	stimulation	protein
D	DYST_04303;	K10941	flrA,	fleQ,	flaK;	sigma-54	dependent	transcriptional	regulator,	flagellar	regulatory	protein
D	DYST_04132;	K03092	rpoN;	RNA	polymerase	sigma-54	factor
D	DYST_04324;	K02405	fliA,	whiG;	RNA	polymerase	sigma	factor	FliA
C	2025	Biofilm	formation	-	Pseudomonas	aeruginosa	[PATH:ko02025]
D	DYST_02034;	K02660	pilJ;	twitching	motility	protein	PilJ
D	DYST_02035;	K02659	pilI;	twitching	motility	protein	PilI
D	DYST_02033;	K06596	chpA;	chemosensory	pili	system	protein	ChpA	(sensor	histidine	kinase/response	regulator)
D	DYST_02031;	K06598	chpC;	chemosensory	pili	system	protein	ChpC
D	DYST_00019;	K02658	pilH;	twitching	motility	two-component	system	response	regulator	PilH
D	DYST_02036;	K02658	pilH;	twitching	motility	two-component	system	response	regulator	PilH
D	DYST_02037;	K02657	pilG;	twitching	motility	two-component	system	response	regulator	PilG
D	DYST_00789;	K10914	crp;	CRP/FNR	family	transcriptional	regulator,	cyclic	AMP	receptor	protein
D	DYST_03681;	K10914	crp;	CRP/FNR	family	transcriptional	regulator,	cyclic	AMP	receptor	protein
D	DYST_04303;	K10941	flrA,	fleQ,	flaK;	sigma-54	dependent	transcriptional	regulator,	flagellar	regulatory	protein
D	DYST_03659;	K01657	trpE;	anthranilate	synthase	component	I	[EC:4.1.3.27]
D	DYST_03676;	K01658	trpG;	anthranilate	synthase	component	II	[EC:4.1.3.27]
D	DYST_00215;	K07689	uvrY,	gacA,	varA;	two-component	system,	NarL	family,	invasion	response	regulator	UvrY
D	DYST_04590;	K03563	csrA;	carbon	storage	regulator
D	DYST_00755;	K20973	sagS;	two-component	system,	sensor	histidine	kinase	SagS	[EC:2.7.13.3]
D	DYST_04347;	K20978	hsbA;	HptB-dependent	secretion	and	biofilm	anti	anti-sigma	factor
D	DYST_04324;	K02405	fliA,	whiG;	RNA	polymerase	sigma	factor	FliA
D	DYST_00707;	K11915	stp1,	pppA;	serine/threonine	protein	phosphatase	Stp1	[EC:3.1.3.16]
D	DYST_00708;	K11890	impM;	type	VI	secretion	system	protein	ImpM
D	DYST_00709;	K11891	impL,	vasK,	icmF;	type	VI	secretion	system	protein	ImpL
D	DYST_00711;	K11893	impJ,	vasE;	type	VI	secretion	system	protein	ImpJ
D	DYST_03603;	K11893	impJ,	vasE;	type	VI	secretion	system	protein	ImpJ
D	DYST_00701;	K11902	impA;	type	VI	secretion	system	protein	ImpA
D	DYST_00727;	K11901	impB;	type	VI	secretion	system	protein	ImpB
D	DYST_03595;	K11901	impB;	type	VI	secretion	system	protein	ImpB
D	DYST_00726;	K11900	impC;	type	VI	secretion	system	protein	ImpC
D	DYST_03596;	K11900	impC;	type	VI	secretion	system	protein	ImpC
D	DYST_00725;	K11903	hcp;	type	VI	secretion	system	secreted	protein	Hcp
D	DYST_03606;	K11903	hcp;	type	VI	secretion	system	secreted	protein	Hcp
D	DYST_00721;	K11895	impH,	vasB;	type	VI	secretion	system	protein	ImpH
D	DYST_03599;	K11895	impH,	vasB;	type	VI	secretion	system	protein	ImpH
D	DYST_00720;	K11907	vasG,	clpV;	type	VI	secretion	system	protein	VasG
D	DYST_03594;	K11907	vasG,	clpV;	type	VI	secretion	system	protein	VasG
D	DYST_01472;	K11444	wspR;	two-component	system,	chemotaxis	family,	response	regulator	WspR	[EC:2.7.7.65]
D	DYST_02311;	K11444	wspR;	two-component	system,	chemotaxis	family,	response	regulator	WspR	[EC:2.7.7.65]
D	DYST_00809;	K21020	siaD;	diguanylate	cyclase	[EC:2.7.7.65]
D	DYST_00921;	K20997	pslA;	polysaccharide	biosynthesis	protein	PslA
D	DYST_02142;	K16011	algA,	xanB,	rfbA,	wbpW,	pslB;	mannose-1-phosphate	guanylyltransferase	/	mannose-6-phosphate	isomerase	[EC:2.7.7.13	5.3.1.8]
D	DYST_00654;	K21011	pelF;	polysaccharide	biosynthesis	protein	PelF
D	DYST_01698;	K21025	fimX;	multidomain	signaling	protein	FimX
C	2026	Biofilm	formation	-	Escherichia	coli	[PATH:ko02026]
D	DYST_00789;	K10914	crp;	CRP/FNR	family	transcriptional	regulator,	cyclic	AMP	receptor	protein
D	DYST_03681;	K10914	crp;	CRP/FNR	family	transcriptional	regulator,	cyclic	AMP	receptor	protein
D	DYST_04324;	K02405	fliA,	whiG;	RNA	polymerase	sigma	factor	FliA
D	DYST_01686;	K06204	dksA;	DnaK	suppressor	protein
D	DYST_01583;	K21088	ydaM;	diguanylate	cyclase	[EC:2.7.7.65]
D	DYST_00053;	K00694	bcsA;	cellulose	synthase	(UDP-forming)	[EC:2.4.1.12]
D	DYST_00951;	K01991	wza,	gfcE;	polysaccharide	biosynthesis/export	protein
D	DYST_02618;	K12687	flu;	antigen	43
D	DYST_00215;	K07689	uvrY,	gacA,	varA;	two-component	system,	NarL	family,	invasion	response	regulator	UvrY
D	DYST_04590;	K03563	csrA;	carbon	storage	regulator
D	DYST_04530;	K11936	pgaC,	icaA;	poly-beta-1,6-N-acetyl-D-glucosamine	synthase	[EC:2.4.1.-]
D	DYST_04048;	K04761	oxyR;	LysR	family	transcriptional	regulator,	hydrogen	peroxide-inducible	genes	activator
D	DYST_02062;	K07648	arcB;	two-component	system,	OmpR	family,	aerobic	respiration	control	sensor	histidine	kinase	ArcB	[EC:2.7.13.3]
D	DYST_02315;	K07677	rcsC;	two-component	system,	NarL	family,	capsular	synthesis	sensor	histidine	kinase	RcsC	[EC:2.7.13.3]
D	DYST_00416;	K07687	rcsB;	two-component	system,	NarL	family,	captular	synthesis	response	regulator	RcsB
D	DYST_00756;	K07687	rcsB;	two-component	system,	NarL	family,	captular	synthesis	response	regulator	RcsB
D	DYST_02314;	K07687	rcsB;	two-component	system,	NarL	family,	captular	synthesis	response	regulator	RcsB
D	DYST_01456;	K03566	gcvA;	LysR	family	transcriptional	regulator,	glycine	cleavage	system	transcriptional	activator
D	DYST_03371;	K03566	gcvA;	LysR	family	transcriptional	regulator,	glycine	cleavage	system	transcriptional	activator
D	DYST_04611;	K03567	gcvR;	glycine	cleavage	system	transcriptional	repressor
B
B	9142	Cell	motility
C	2030	Bacterial	chemotaxis	[PATH:ko02030]
D	DYST_01445;	K03406	mcp;	methyl-accepting	chemotaxis	protein
D	DYST_04342;	K03406	mcp;	methyl-accepting	chemotaxis	protein
D	DYST_04346;	K03406	mcp;	methyl-accepting	chemotaxis	protein
D	DYST_04340;	K05875	tar;	methyl-accepting	chemotaxis	protein	II,	aspartate	sensor	receptor
D	DYST_02321;	K05877	tap;	methyl-accepting	chemotaxis	protein	IV,	peptide	sensor	receptor
D	DYST_04327;	K03407	cheA;	two-component	system,	chemotaxis	family,	sensor	kinase	CheA	[EC:2.7.13.3]
D	DYST_04339;	K03407	cheA;	two-component	system,	chemotaxis	family,	sensor	kinase	CheA	[EC:2.7.13.3]
D	DYST_04330;	K03408	cheW;	purine-binding	chemotaxis	protein	CheW
D	DYST_04341;	K03408	cheW;	purine-binding	chemotaxis	protein	CheW
D	DYST_04325;	K03413	cheY;	two-component	system,	chemotaxis	family,	chemotaxis	protein	CheY
D	DYST_04338;	K03413	cheY;	two-component	system,	chemotaxis	family,	chemotaxis	protein	CheY
D	DYST_04326;	K03414	cheZ;	chemotaxis	protein	CheZ
D	DYST_04345;	K03412	cheB;	two-component	system,	chemotaxis	family,	protein-glutamate	methylesterase/glutaminase	[EC:3.1.1.61	3.5.1.44]
D	DYST_04287;	K03415	cheV;	two-component	system,	chemotaxis	family,	chemotaxis	protein	CheV
D	DYST_01443;	K03411	cheD;	chemotaxis	protein	CheD	[EC:3.5.1.44]
D	DYST_04344;	K03411	cheD;	chemotaxis	protein	CheD	[EC:3.5.1.44]
D	DYST_01444;	K00575	cheR;	chemotaxis	protein	methyltransferase	CheR	[EC:2.1.1.80]
D	DYST_02084;	K00575	cheR;	chemotaxis	protein	methyltransferase	CheR	[EC:2.1.1.80]
D	DYST_04343;	K00575	cheR;	chemotaxis	protein	methyltransferase	CheR	[EC:2.1.1.80]
D	DYST_04306;	K02410	fliG;	flagellar	motor	switch	protein	FliG
D	DYST_04313;	K02416	fliM;	flagellar	motor	switch	protein	FliM
D	DYST_04314;	K02417	fliN;	flagellar	motor	switch	protein	FliN
D	DYST_01490;	K02556	motA;	chemotaxis	protein	MotA
D	DYST_04328;	K02556	motA;	chemotaxis	protein	MotA
D	DYST_01491;	K02557	motB;	chemotaxis	protein	MotB
D	DYST_01561;	K02557	motB;	chemotaxis	protein	MotB
D	DYST_03374;	K02557	motB;	chemotaxis	protein	MotB
D	DYST_04329;	K02557	motB;	chemotaxis	protein	MotB
C	2040	Flagellar	assembly	[PATH:ko02040]
D	DYST_04304;	K02408	fliE;	flagellar	hook-basal	body	complex	protein	FliE
D	DYST_00608;	K02409	fliF;	flagellar	M-ring	protein	FliF
D	DYST_04305;	K02409	fliF;	flagellar	M-ring	protein	FliF
D	DYST_04306;	K02410	fliG;	flagellar	motor	switch	protein	FliG
D	DYST_04307;	K02411	fliH;	flagellar	assembly	protein	FliH
D	DYST_00611;	K02412	fliI;	flagellum-specific	ATP	synthase	[EC:7.4.2.8]
D	DYST_04308;	K02412	fliI;	flagellum-specific	ATP	synthase	[EC:7.4.2.8]
D	DYST_04309;	K02413	fliJ;	flagellar	protein	FliJ
D	DYST_04312;	K02415	fliL;	flagellar	protein	FliL
D	DYST_04313;	K02416	fliM;	flagellar	motor	switch	protein	FliM
D	DYST_04314;	K02417	fliN;	flagellar	motor	switch	protein	FliN
D	DYST_00619;	K02419	fliP;	flagellar	biosynthesis	protein	FliP
D	DYST_04316;	K02419	fliP;	flagellar	biosynthesis	protein	FliP
D	DYST_00596;	K02420	fliQ;	flagellar	biosynthesis	protein	FliQ
D	DYST_04317;	K02420	fliQ;	flagellar	biosynthesis	protein	FliQ
D	DYST_04318;	K02421	fliR;	flagellar	biosynthesis	protein	FliR
D	DYST_00599;	K02400	flhA;	flagellar	biosynthesis	protein	FlhA
D	DYST_04320;	K02400	flhA;	flagellar	biosynthesis	protein	FlhA
D	DYST_04319;	K02401	flhB;	flagellar	biosynthesis	protein	FlhB
D	DYST_00598;	K13820	fliR-flhB;	flagellar	biosynthesis	protein	FliR/FlhB
D	DYST_04285;	K02386	flgA;	flagellar	basal	body	P-ring	formation	protein	FlgA
D	DYST_04288;	K02387	flgB;	flagellar	basal-body	rod	protein	FlgB
D	DYST_04289;	K02388	flgC;	flagellar	basal-body	rod	protein	FlgC
D	DYST_00614;	K02389	flgD;	flagellar	basal-body	rod	modification	protein	FlgD
D	DYST_04290;	K02389	flgD;	flagellar	basal-body	rod	modification	protein	FlgD
D	DYST_04291;	K02390	flgE;	flagellar	hook	protein	FlgE
D	DYST_04292;	K02391	flgF;	flagellar	basal-body	rod	protein	FlgF
D	DYST_04293;	K02392	flgG;	flagellar	basal-body	rod	protein	FlgG
D	DYST_00603;	K02393	flgH;	flagellar	L-ring	protein	FlgH
D	DYST_00604;	K02394	flgI;	flagellar	P-ring	protein	FlgI
D	DYST_04294;	K02394	flgI;	flagellar	P-ring	protein	FlgI
D	DYST_04295;	K02395	flgJ;	peptidoglycan	hydrolase	FlgJ
D	DYST_04296;	K02396	flgK;	flagellar	hook-associated	protein	1
D	DYST_04297;	K02397	flgL;	flagellar	hook-associated	protein	3	FlgL
D	DYST_04298;	K02406	fliC,	hag;	flagellin
D	DYST_04299;	K02407	fliD;	flagellar	hook-associated	protein	2
D	DYST_04300;	K02422	fliS;	flagellar	secretion	chaperone	FliS
D	DYST_01490;	K02556	motA;	chemotaxis	protein	MotA
D	DYST_04328;	K02556	motA;	chemotaxis	protein	MotA
D	DYST_01491;	K02557	motB;	chemotaxis	protein	MotB
D	DYST_01561;	K02557	motB;	chemotaxis	protein	MotB
D	DYST_03374;	K02557	motB;	chemotaxis	protein	MotB
D	DYST_04329;	K02557	motB;	chemotaxis	protein	MotB
D	DYST_03199;	K03086	rpoD;	RNA	polymerase	primary	sigma	factor
D	DYST_04303;	K10941	flrA,	fleQ,	flaK;	sigma-54	dependent	transcriptional	regulator,	flagellar	regulatory	protein
D	DYST_04132;	K03092	rpoN;	RNA	polymerase	sigma-54	factor
D	DYST_04324;	K02405	fliA,	whiG;	RNA	polymerase	sigma	factor	FliA
C	4810	Regulation	of	actin	cytoskeleton	[PATH:ko04810]
#

## Sheet: Level 1-BRITE Hierarchies
Level 1 KEGG Annotations for BRITE Hierarchies
A09180 Brite Hierarchies
B
B 09181 Protein families: metabolism
C 01000 Enzymes [BR:ko01000]
C 01001 Protein kinases [BR:ko01001]
D DYST_04703; K08796 BRSK; BR serine/threonine kinase [EC:2.7.11.1]
D DYST_02918; K07178 RIOK1; RIO kinase 1 [EC:2.7.11.1]
D DYST_00706; K12132 prkC, stkP; eukaryotic-like serine/threonine-protein kinase [EC:2.7.11.1]
D DYST_01406; K12132 prkC, stkP; eukaryotic-like serine/threonine-protein kinase [EC:2.7.11.1]
D DYST_00949; K16692 etk-wzc; tyrosine-protein kinase Etk/Wzc [EC:2.7.10.-]
D DYST_04598; K07636 phoR; two-component system, OmpR family, phosphate regulon sensor histidine kinase PhoR [EC:2.7.13.3]
D DYST_02195; K07637 phoQ; two-component system, OmpR family, sensor histidine kinase PhoQ [EC:2.7.13.3]
D DYST_01194; K07644 cusS, copS, silS; two-component system, OmpR family, heavy metal sensor histidine kinase CusS [EC:2.7.13.3]
D DYST_00345; K07645 qseC; two-component system, OmpR family, sensor histidine kinase QseC [EC:2.7.13.3]
D DYST_01246; K07645 qseC; two-component system, OmpR family, sensor histidine kinase QseC [EC:2.7.13.3]
D DYST_01815; K07645 qseC; two-component system, OmpR family, sensor histidine kinase QseC [EC:2.7.13.3]
D DYST_02622; K07645 qseC; two-component system, OmpR family, sensor histidine kinase QseC [EC:2.7.13.3]
D DYST_03425; K07645 qseC; two-component system, OmpR family, sensor histidine kinase QseC [EC:2.7.13.3]
D DYST_03928; K07646 kdpD; two-component system, OmpR family, sensor histidine kinase KdpD [EC:2.7.13.3]
D DYST_02062; K07648 arcB; two-component system, OmpR family, aerobic respiration control sensor histidine kinase ArcB [EC:2.7.13.3]
D DYST_03523; K07649 tctE; two-component system, OmpR family, sensor histidine kinase TctE [EC:2.7.13.3]
D DYST_01499; K07654 mtrB; two-component system, OmpR family, sensor histidine kinase MtrB [EC:2.7.13.3]
D DYST_03657; K14980 chvG; two-component system, OmpR family, sensor histidine kinase ChvG [EC:2.7.13.3]
D DYST_01377; K18072 parS; two-component system, OmpR family, sensor kinase ParS [EC:2.7.13.3]
D DYST_01176; K02484 K02484; two-component system, OmpR family, sensor kinase [EC:2.7.13.3]
D DYST_00469; K07674 narQ; two-component system, NarL family, nitrate/nitrite sensor histidine kinase NarQ [EC:2.7.13.3]
D DYST_00095; K07675 uhpB; two-component system, NarL family, sensor histidine kinase UhpB [EC:2.7.13.3]
D DYST_02315; K07677 rcsC; two-component system, NarL family, capsular synthesis sensor histidine kinase RcsC [EC:2.7.13.3]
D DYST_01909; K07778 desK; two-component system, NarL family, sensor histidine kinase DesK [EC:2.7.13.3]
D DYST_00240; K11617 liaS; two-component system, NarL family, sensor histidine kinase LiaS [EC:2.7.13.3]
D DYST_02769; K02480 K02480; two-component system, NarL family, sensor kinase [EC:2.7.13.3]
D DYST_03144; K08082 algZ; two-component system, LytTR family, sensor histidine kinase AlgZ [EC:2.7.13.3]
D DYST_02754; K02478 K02478; two-component system, LytTR family, sensor kinase [EC:2.7.13.3]
D DYST_03037; K02478 K02478; two-component system, LytTR family, sensor kinase [EC:2.7.13.3]
D DYST_03004; K07708 glnL, ntrB; two-component system, NtrC family, nitrogen regulation sensor histidine kinase GlnL [EC:2.7.13.3]
D DYST_04258; K13598 ntrY; two-component system, NtrC family, nitrogen regulation sensor histidine kinase NtrY [EC:2.7.13.3]
D DYST_03984; K02668 pilS, pehS; two-component system, NtrC family, sensor histidine kinase PilS [EC:2.7.13.3]
D DYST_04327; K03407 cheA; two-component system, chemotaxis family, sensor kinase CheA [EC:2.7.13.3]
D DYST_04339; K03407 cheA; two-component system, chemotaxis family, sensor kinase CheA [EC:2.7.13.3]
D DYST_02033; K06596 chpA; chemosensory pili system protein ChpA (sensor histidine kinase/response regulator)
D DYST_03973; K11354 cph1; two-component system, chemotaxis family, sensor kinase Cph1 [EC:2.7.13.3]
D DYST_03343; K13587 cckA; two-component system, cell cycle sensor histidine kinase and response regulator CckA [EC:2.7.13.3]
D DYST_01652; K07718 yesM; two-component system, sensor histidine kinase YesM [EC:2.7.13.3]
D DYST_02009; K15011 regB, regS, actS; two-component system, sensor histidine kinase RegB [EC:2.7.13.3]
D DYST_00755; K20973 sagS; two-component system, sensor histidine kinase SagS [EC:2.7.13.3]
D DYST_01412; K11527 K11527; two-component system, sensor histidine kinase and response regulator [EC:2.7.13.3]
C 01009 Protein phosphatases and associated proteins [BR:ko01009]
D DYST_03841; K01251 E3.3.1.1, ahcY; adenosylhomocysteinase [EC:3.3.1.1]
D DYST_00595; K03350 APC3, CDC27; anaphase-promoting complex subunit 3
D DYST_04575; K04079 HSP90A, htpG; molecular chaperone HtpG
D DYST_00892; K20074 prpC, phpP; PPM family protein phosphatase [EC:3.1.3.16]
D DYST_03432; K08726 EPHX2; soluble epoxide hydrolase / lipid-phosphate phosphatase [EC:3.3.2.10 3.1.3.76]
C 01002 Peptidases and inhibitors [BR:ko01002]
D DYST_04646; K03101 lspA; signal peptidase II [EC:3.4.23.36]
D DYST_01993; K02654 pilD, pppA; leader peptidase (prepilin peptidase) / N-methyltransferase [EC:3.4.23.43 2.1.1.-]
D DYST_02849; K01304 pcp; pyroglutamyl-peptidase [EC:3.4.19.3]
D DYST_00453; K01951 guaA, GMPS; GMP synthase (glutamine-hydrolysing) [EC:6.3.5.2]
D DYST_02956; K01951 guaA, GMPS; GMP synthase (glutamine-hydrolysing) [EC:6.3.5.2]
D DYST_02212; K13409 cvaB, mchF, raxB; ATP-binding cassette, subfamily B, bacterial CvaB/MchF/RaxB
D DYST_01801; K19303 mepH; murein DD-endopeptidase [EC:3.4.-.-]
D DYST_01105; K00764 purF, PPAT; amidophosphoribosyltransferase [EC:2.4.2.14]
D DYST_02547; K00265 gltB; glutamate synthase (NADPH) large chain [EC:1.4.1.13]
D DYST_02143; K00820 glmS, GFPT; glutamine---fructose-6-phosphate transaminase (isomerizing) [EC:2.6.1.16]
D DYST_02857; K00820 glmS, GFPT; glutamine---fructose-6-phosphate transaminase (isomerizing) [EC:2.6.1.16]
D DYST_00373; K01953 asnB, ASNS; asparagine synthase (glutamine-hydrolysing) [EC:6.3.5.4]
D DYST_02082; K07052 K07052; CAAX protease family protein
D DYST_04508; K07052 K07052; CAAX protease family protein
D DYST_03314; K01254 LTA4H; leukotriene-A4 hydrolase [EC:3.3.2.6]
D DYST_02942; K01256 pepN; aminopeptidase N [EC:3.4.11.2]
D DYST_04049; K01256 pepN; aminopeptidase N [EC:3.4.11.2]
D DYST_01296; K08776 NPEPPS; puromycin-sensitive aminopeptidase [EC:3.4.11.14]
D DYST_03125; K01414 prlC; oligopeptidase A [EC:3.4.24.70]
D DYST_03505; K01284 dcp; peptidyl-dipeptidase Dcp [EC:3.4.15.5]
D DYST_01782; K07386 pepO; putative endopeptidase [EC:3.4.24.-]
D DYST_01835; K07386 pepO; putative endopeptidase [EC:3.4.24.-]
D DYST_02592; K07386 pepO; putative endopeptidase [EC:3.4.24.-]
D DYST_04097; K07386 pepO; putative endopeptidase [EC:3.4.24.-]
D DYST_03665; K08641 vanX; zinc D-Ala-D-Ala dipeptidase [EC:3.4.13.22]
D DYST_03294; K07263 pqqL; zinc protease [EC:3.4.24.-]
D DYST_02060; K01255 CARP, pepA; leucyl aminopeptidase [EC:3.4.11.1]
D DYST_02375; K01255 CARP, pepA; leucyl aminopeptidase [EC:3.4.11.1]
D DYST_04583; K01273 DPEP; membrane dipeptidase [EC:3.4.13.19]
D DYST_04497; K01439 dapE; succinyl-diaminopimelate desuccinylase [EC:3.5.1.18]
D DYST_04491; K01265 map; methionyl aminopeptidase [EC:3.4.11.18]
D DYST_01604; K01271 pepQ; Xaa-Pro dipeptidase [EC:3.4.13.9]
D DYST_02673; K01271 pepQ; Xaa-Pro dipeptidase [EC:3.4.13.9]
D DYST_03703; K01271 pepQ; Xaa-Pro dipeptidase [EC:3.4.13.9]
D DYST_01039; K01262 pepP; Xaa-Pro aminopeptidase [EC:3.4.11.9]
D DYST_03698; K01262 pepP; Xaa-Pro aminopeptidase [EC:3.4.11.9]
D DYST_04729; K01301 NAALAD; N-acetylated-alpha-linked acidic dipeptidase [EC:3.4.17.21]
D DYST_03803; K01302 CPQ; carboxypeptidase Q [EC:3.4.17.-]
D DYST_01018; K03798 ftsH, hflB; cell division protease FtsH [EC:3.4.24.-]
D DYST_04574; K03799 htpX; heat shock protein HtpX [EC:3.4.24.-]
D DYST_04600; K01423 bepA; beta-barrel assembly-enhancing protease [EC:3.4.-.-]
D DYST_04482; K11749 rseP; regulator of sigma E protease [EC:3.4.24.-]
D DYST_02602; K02172 blaR1; bla regulator protein blaR1
D DYST_02194; K09933 mtfA; MtfA peptidase
D DYST_00871; K04771 degP, htrA; serine protease Do [EC:3.4.21.107]
D DYST_02372; K04771 degP, htrA; serine protease Do [EC:3.4.21.107]
D DYST_01964; K04691 hhoB, degS; serine protease DegS [EC:3.4.21.-]
D DYST_00633; K01342 aprE; subtilisin [EC:3.4.21.62]
D DYST_03346; K01336 E3.4.21.48; cerevisin [EC:3.4.21.48]
D DYST_02705; K14645 K14645; serine protease [EC:3.4.21.-]
D DYST_02424; K01322 PREP; prolyl oligopeptidase [EC:3.4.21.26]
D DYST_02425; K01322 PREP; prolyl oligopeptidase [EC:3.4.21.26]
D DYST_03102; K01278 DPP4, CD26; dipeptidyl-peptidase 4 [EC:3.4.14.5]
D DYST_01551; K01303 APEH; acylaminoacyl-peptidase [EC:3.4.19.1]
D DYST_03071; K01303 APEH; acylaminoacyl-peptidase [EC:3.4.19.1]
D DYST_03317; K01288 KEX1; carboxypeptidase D [EC:3.4.16.6]
D DYST_00837; K16297 SCPL-II; serine carboxypeptidase-like clade II [EC:3.4.16.-]
D DYST_02384; K07258 dacC, dacA, dacD; serine-type D-Ala-D-Ala carboxypeptidase (penicillin-binding protein 5/6) [EC:3.4.16.4]
D DYST_03849; K07258 dacC, dacA, dacD; serine-type D-Ala-D-Ala carboxypeptidase (penicillin-binding protein 5/6) [EC:3.4.16.4]
D DYST_04556; K07259 dacB; serine-type D-Ala-D-Ala carboxypeptidase/endopeptidase (penicillin-binding protein 4) [EC:3.4.16.4 3.4.21.-]
D DYST_00904; K01358 clpP, CLPP; ATP-dependent Clp protease, protease subunit [EC:3.4.21.92]
D DYST_00902; K01338 lon; ATP-dependent Lon protease [EC:3.4.21.53]
D DYST_00516; K01356 lexA; repressor LexA [EC:3.4.21.88]
D DYST_00869; K03100 lepB; signal peptidase I [EC:3.4.21.89]
D DYST_00890; K03100 lepB; signal peptidase I [EC:3.4.21.89]
D DYST_01920; K01259 pip; proline iminopeptidase [EC:3.4.11.5]
D DYST_03432; K08726 EPHX2; soluble epoxide hydrolase / lipid-phosphate phosphatase [EC:3.3.2.10 3.1.3.76]
D DYST_02780; K01054 MGLL; acylglycerol lipase [EC:3.1.1.23]
D DYST_02380; K03797 E3.4.21.102, prc, ctpA; carboxyl-terminal processing protease [EC:3.4.21.102]
D DYST_02549; K03797 E3.4.21.102, prc, ctpA; carboxyl-terminal processing protease [EC:3.4.21.102]
D DYST_02290; K04773 sppA; protease IV [EC:3.4.21.-]
D DYST_03434; K01279 TPP1, CLN2; tripeptidyl-peptidase I [EC:3.4.14.9]
D DYST_01796; K09650 PARL, PSARL, PCP1; rhomboid-like protein [EC:3.4.21.105]
D DYST_04229; K01297 ldcA; muramoyltetrapeptide carboxypeptidase [EC:3.4.17.13]
D DYST_03105; K01419 hslV, clpQ; ATP-dependent HslUV protease, peptidase subunit HslV [EC:3.4.25.2]
D DYST_02011; K13051 ASRGL1, iaaA; L-asparaginase / beta-aspartyl-peptidase [EC:3.5.1.1 3.4.19.5]
D DYST_04173; K00681 ggt; gamma-glutamyltranspeptidase / glutathione hydrolase [EC:2.3.2.2 3.4.19.13]
D DYST_04464; K03592 pmbA; PmbA protein
D DYST_04458; K03568 tldD; TldD protein
D DYST_00122; K06894 yfhM; alpha-2-macroglobulin
D DYST_01308; K04087 hflC; modulator of FtsH protease HflC
D DYST_01309; K04088 hflK; modulator of FtsH protease HflK
C 01003 Glycosyltransferases [BR:ko01003]
D DYST_01989; K00721 DPM1; dolichol-phosphate mannosyltransferase [EC:2.4.1.83]
D DYST_04389; K09667 OGT; protein O-GlcNAc transferase [EC:2.4.1.255]
D DYST_01981; K23424 TMTC; protein O-mannosyl-transferase [EC:2.4.1.-]
D DYST_00510; K00720 UGCG; ceramide glucosyltransferase [EC:2.4.1.80]
D DYST_00525; K03429 ugtP; processive 1,2-diacylglycerol beta-glucosyltransferase [EC:2.4.1.315]
D DYST_00053; K00694 bcsA; cellulose synthase (UDP-forming) [EC:2.4.1.12]
D DYST_02098; K03814 mtgA; monofunctional glycosyltransferase [EC:2.4.1.129]
D DYST_00123; K05367 pbpC; penicillin-binding protein 1C [EC:2.4.1.129]
D DYST_04110; K05365 mrcB; penicillin-binding protein 1B [EC:2.4.1.129 3.4.16.4]
D DYST_03787; K05366 mrcA; penicillin-binding protein 1A [EC:2.4.1.129 3.4.16.4]
D DYST_00654; K21011 pelF; polysaccharide biosynthesis protein PelF
D DYST_04530; K11936 pgaC, icaA; poly-beta-1,6-N-acetyl-D-glucosamine synthase [EC:2.4.1.-]
D DYST_03999; K00697 otsA; trehalose 6-phosphate synthase [EC:2.4.1.15 2.4.1.347]
D DYST_00941; K16698 tuaG; teichuronic acid biosynthesis glycosyltransferase TuaG [EC:2.4.-.-]
C 01005 Lipopolysaccharide biosynthesis proteins [BR:ko01005]
D DYST_04478; K00677 lpxA; UDP-N-acetylglucosamine acyltransferase [EC:2.3.1.129]
D DYST_04477; K00748 lpxB; lipid-A-disaccharide synthase [EC:2.4.1.182]
D DYST_03901; K02535 lpxC; UDP-3-O-[3-hydroxymyristoyl] N-acetylglucosamine deacetylase [EC:3.5.1.108]
D DYST_04480; K02536 lpxD; UDP-3-O-[3-hydroxymyristoyl] glucosamine N-acyltransferase [EC:2.3.1.191]
D DYST_04594; K03269 lpxH; UDP-2,3-diacylglucosamine hydrolase [EC:3.6.1.54]
D DYST_04871; K00912 lpxK; tetraacyldisaccharide 4'-kinase [EC:2.7.1.130]
D DYST_02436; K02517 lpxL, htrB; Kdo2-lipid IVA lauroyltransferase/acyltransferase [EC:2.3.1.241 2.3.1.-]
D DYST_03201; K02517 lpxL, htrB; Kdo2-lipid IVA lauroyltransferase/acyltransferase [EC:2.3.1.241 2.3.1.-]
D DYST_04607; K12979 lpxO; beta-hydroxylase [EC:1.14.11.-]
D DYST_02435; K02527 kdtA, waaA; 3-deoxy-D-manno-octulosonic-acid transferase [EC:2.4.99.12 2.4.99.13 2.4.99.14 2.4.99.15]
D DYST_03213; K07264 arnT, pmrK; 4-amino-4-deoxy-L-arabinose transferase [EC:2.4.2.43]
D DYST_04875; K11211 kdkA; 3-deoxy-D-manno-octulosonic acid kinase [EC:2.7.1.166]
D DYST_01033; K01627 kdsA; 2-dehydro-3-deoxyphosphooctonate aldolase (KDO 8-P synthase) [EC:2.5.1.55]
D DYST_00423; K00979 kdsB; 3-deoxy-manno-octulosonate cytidylyltransferase (CMP-KDO synthetase) [EC:2.7.7.38]
D DYST_04136; K03270 kdsC; 3-deoxy-D-manno-octulosonate 8-phosphate phosphatase (KDO 8-P phosphatase) [EC:3.1.3.45]
D DYST_04137; K06041 kdsD, kpsF; arabinose-5-phosphate isomerase [EC:5.3.1.13]
D DYST_03206; K12984 waaE, kdtX; (heptosyl)LPS beta-1,4-glucosyltransferase [EC:2.4.1.-]
D DYST_01588; K03280 waaK, rfaK; UDP-N-acetylglucosamine:(glucosyl)LPS alpha-1,2-N-acetylglucosaminyltransferase [EC:2.4.1.56]
D DYST_01994; K19353 eptC; heptose-I-phosphate ethanolaminephosphotransferase [EC:2.7.8.-]
D DYST_04874; K12982 opsX; heptosyltransferase I [EC:2.4.-.-]
D DYST_00645; K12988 wapR; alpha-1,3-rhamnosyltransferase [EC:2.4.1.-]
D DYST_00119; K13007 wbpL; glycosyltransferase WbpL [EC:2.4.1.-]
D DYST_02099; K20534 gtrB, csbB; polyisoprenyl-phosphate glycosyltransferase [EC:2.4.-.-]
C 01011 Peptidoglycan biosynthesis and degradation proteins [BR:ko01011]
D DYST_04139; K00790 murA; UDP-N-acetylglucosamine 1-carboxyvinyltransferase [EC:2.5.1.7]
D DYST_04794; K00075 murB; UDP-N-acetylmuramate dehydrogenase [EC:1.3.1.98]
D DYST_03896; K01924 murC; UDP-N-acetylmuramate--alanine ligase [EC:6.3.2.8]
D DYST_04094; K01925 murD; UDP-N-acetylmuramoylalanine--D-glutamate ligase [EC:6.3.2.9]
D DYST_03891; K01928 murE; UDP-N-acetylmuramoyl-L-alanyl-D-glutamate--2,6-diaminopimelate ligase [EC:6.3.2.13]
D DYST_03897; K01921 ddl; D-alanine-D-alanine ligase [EC:6.3.2.4]
D DYST_01708; K01775 alr; alanine racemase [EC:5.1.1.1]
D DYST_04229; K01297 ldcA; muramoyltetrapeptide carboxypeptidase [EC:3.4.17.13]
D DYST_03893; K01000 mraY; phospho-N-acetylmuramoyl-pentapeptide-transferase [EC:2.7.8.13]
D DYST_03895; K02563 murG; UDP-N-acetylglucosamine--N-acetylmuramyl-(pentapeptide) pyrophosphoryl-undecaprenol N-acetylglucosamine transferase [EC:2.4.1.227]
D DYST_03027; K06153 bacA; undecaprenyl-diphosphatase [EC:3.6.1.27]
D DYST_01448; K19302 bcrC; undecaprenyl-diphosphatase [EC:3.6.1.27]
D DYST_04643; K03980 murJ, mviN; putative peptidoglycan lipid II flippase
D DYST_03787; K05366 mrcA; penicillin-binding protein 1A [EC:2.4.1.129 3.4.16.4]
D DYST_04110; K05365 mrcB; penicillin-binding protein 1B [EC:2.4.1.129 3.4.16.4]
D DYST_00123; K05367 pbpC; penicillin-binding protein 1C [EC:2.4.1.129]
D DYST_02388; K05515 mrdA; penicillin-binding protein 2 [EC:3.4.16.4]
D DYST_03890; K03587 ftsI; cell division protein FtsI (penicillin-binding protein 3) [EC:3.4.16.4]
D DYST_02384; K07258 dacC, dacA, dacD; serine-type D-Ala-D-Ala carboxypeptidase (penicillin-binding protein 5/6) [EC:3.4.16.4]
D DYST_03849; K07258 dacC, dacA, dacD; serine-type D-Ala-D-Ala carboxypeptidase (penicillin-binding protein 5/6) [EC:3.4.16.4]
D DYST_04556; K07259 dacB; serine-type D-Ala-D-Ala carboxypeptidase/endopeptidase (penicillin-binding protein 4) [EC:3.4.16.4 3.4.21.-]
D DYST_02098; K03814 mtgA; monofunctional glycosyltransferase [EC:2.4.1.129]
D DYST_03665; K08641 vanX; zinc D-Ala-D-Ala dipeptidase [EC:3.4.13.22]
D DYST_01801; K19303 mepH; murein DD-endopeptidase [EC:3.4.-.-]
D DYST_03494; K08309 slt; soluble lytic murein transglycosylase [EC:4.2.2.-]
D DYST_02386; K08305 mltB; membrane-bound lytic murein transglycosylase B [EC:4.2.2.-]
D DYST_00898; K08307 mltD, dniR; membrane-bound lytic murein transglycosylase D [EC:4.2.2.-]
D DYST_04626; K01448 amiABC; N-acetylmuramoyl-L-alanine amidase [EC:3.5.1.28]
D DYST_01662; K11066 E3.5.1.28D, amiD; N-acetylmuramoyl-L-alanine amidase [EC:3.5.1.28]
C 01004 Lipid biosynthesis proteins [BR:ko01004]
D DYST_04895; K00645 fabD, MCAT, MCT1; [acyl-carrier-protein] S-malonyltransferase [EC:2.3.1.39]
D DYST_04894; K00648 fabH; 3-oxoacyl-[acyl-carrier-protein] synthase III [EC:2.3.1.180]
D DYST_04898; K09458 fabF, OXSM, CEM1; 3-oxoacyl-[acyl-carrier-protein] synthase II [EC:2.3.1.179]
D DYST_01719; K00059 fabG, OAR1; 3-oxoacyl-[acyl-carrier protein] reductase [EC:1.1.1.100]
D DYST_02978; K00059 fabG, OAR1; 3-oxoacyl-[acyl-carrier protein] reductase [EC:1.1.1.100]
D DYST_03267; K00059 fabG, OAR1; 3-oxoacyl-[acyl-carrier protein] reductase [EC:1.1.1.100]
D DYST_04121; K00059 fabG, OAR1; 3-oxoacyl-[acyl-carrier protein] reductase [EC:1.1.1.100]
D DYST_04572; K00059 fabG, OAR1; 3-oxoacyl-[acyl-carrier protein] reductase [EC:1.1.1.100]
D DYST_04896; K00059 fabG, OAR1; 3-oxoacyl-[acyl-carrier protein] reductase [EC:1.1.1.100]
D DYST_04479; K02372 fabZ; 3-hydroxyacyl-[acyl-carrier-protein] dehydratase [EC:4.2.1.59]
D DYST_00396; K00209 fabV, ter; enoyl-[acyl-carrier protein] reductase / trans-2-enoyl-CoA reductase (NAD+) [EC:1.3.1.9 1.3.1.44]
D DYST_02015; K10804 tesA; acyl-CoA thioesterase I [EC:3.1.2.- 3.1.2.2 3.1.1.2 3.1.1.5]
D DYST_02752; K10804 tesA; acyl-CoA thioesterase I [EC:3.1.2.- 3.1.2.2 3.1.1.2 3.1.1.5]
D DYST_04777; K10805 tesB; acyl-CoA thioesterase II [EC:3.1.2.-]
D DYST_02804; K00507 SCD, desC; stearoyl-CoA desaturase (Delta-9 desaturase) [EC:1.14.19.1]
D DYST_02080; K00508 E1.14.19.3; linoleoyl-CoA desaturase [EC:1.14.19.3]
D DYST_00927; K12444 ppsE; phthiocerol/phenolphthiocerol synthesis type-I polyketide synthase E [EC:2.3.1.292]
D DYST_03077; K01895 ACSS1_2, acs; acetyl-CoA synthetase [EC:6.2.1.1]
D DYST_01337; K01908 ACSS3, prpE; propionyl-CoA synthetase [EC:6.2.1.17]
D DYST_00259; K01897 ACSL, fadD; long-chain acyl-CoA synthetase [EC:6.2.1.3]
D DYST_01081; K01897 ACSL, fadD; long-chain acyl-CoA synthetase [EC:6.2.1.3]
D DYST_03348; K00666 K00666; fatty-acyl-CoA synthase [EC:6.2.1.-]
D DYST_03508; K00666 K00666; fatty-acyl-CoA synthase [EC:6.2.1.-]
D DYST_02820; K00631 plsB; glycerol-3-phosphate O-acyltransferase [EC:2.3.1.15]
C 01008 Polyketide biosynthesis proteins [BR:ko01008]
D DYST_00927; K12444 ppsE; phthiocerol/phenolphthiocerol synthesis type-I polyketide synthase E [EC:2.3.1.292]
D DYST_00928; K15667 ppsD, fenA; plipastatin/fengycin lipopeptide synthetase D
C 01006 Prenyltransferases [BR:ko01006]
D DYST_00498; K00795 ispA; farnesyl diphosphate synthase [EC:2.5.1.1 2.5.1.10]
D DYST_04467; K13789 GGPS; geranylgeranyl diphosphate synthase, type II [EC:2.5.1.1 2.5.1.10 2.5.1.29]
D DYST_03919; K02523 ispB; octaprenyl-diphosphate synthase [EC:2.5.1.90]
D DYST_04485; K00806 uppS; undecaprenyl diphosphate synthase [EC:2.5.1.31]
D DYST_00504; K00801 FDFT1; farnesyl-diphosphate farnesyltransferase [EC:2.5.1.21]
D DYST_01312; K00791 miaA, TRIT1; tRNA dimethylallyltransferase [EC:2.5.1.75]
D DYST_02903; K03179 ubiA; 4-hydroxybenzoate polyprenyltransferase [EC:2.5.1.39]
D DYST_03468; K02257 COX10, ctaB, cyoE; heme o synthase [EC:2.5.1.141]
C 01007 Amino acid related enzymes [BR:ko01007]
D DYST_01200; K01885 EARS, gltX; glutamyl-tRNA synthetase [EC:6.1.1.17]
D DYST_04043; K01886 QARS, glnS; glutaminyl-tRNA synthetase [EC:6.1.1.18]
D DYST_04573; K01894 gluQ; glutamyl-Q tRNA(Asp) synthetase [EC:6.1.1.-]
D DYST_02965; K01866 YARS, tyrS; tyrosyl-tRNA synthetase [EC:6.1.1.1]
D DYST_02183; K01867 WARS, trpS; tryptophanyl-tRNA synthetase [EC:6.1.1.2]
D DYST_01684; K01883 CARS, cysS; cysteinyl-tRNA synthetase [EC:6.1.1.16]
D DYST_02981; K01887 RARS, argS; arginyl-tRNA synthetase [EC:6.1.1.19]
D DYST_01239; K01874 MARS, metG; methionyl-tRNA synthetase [EC:6.1.1.10]
D DYST_04645; K01870 IARS, ileS; isoleucyl-tRNA synthetase [EC:6.1.1.5]
D DYST_04269; K01873 VARS, valS; valyl-tRNA synthetase [EC:6.1.1.9]
D DYST_01768; K01869 LARS, leuS; leucyl-tRNA synthetase [EC:6.1.1.4]
D DYST_00381; K04567 KARS, lysS; lysyl-tRNA synthetase, class II [EC:6.1.1.6]
D DYST_04018; K01876 DARS2, aspS; aspartyl-tRNA synthetase [EC:6.1.1.12]
D DYST_01716; K01893 NARS, asnS; asparaginyl-tRNA synthetase [EC:6.1.1.22]
D DYST_01073; K01892 HARS, hisS; histidyl-tRNA synthetase [EC:6.1.1.21]
D DYST_02954; K01878 glyQ; glycyl-tRNA synthetase alpha chain [EC:6.1.1.14]
D DYST_02953; K01879 glyS; glycyl-tRNA synthetase beta chain [EC:6.1.1.14]
D DYST_00796; K01875 SARS, serS; seryl-tRNA synthetase [EC:6.1.1.11]
D DYST_04264; K01881 PARS, proS; prolyl-tRNA synthetase [EC:6.1.1.15]
D DYST_01932; K01868 TARS, thrS; threonyl-tRNA synthetase [EC:6.1.1.3]
D DYST_04589; K01872 AARS, alaS; alanyl-tRNA synthetase [EC:6.1.1.7]
D DYST_01928; K01889 FARSA, pheS; phenylalanyl-tRNA synthetase alpha chain [EC:6.1.1.20]
D DYST_01927; K01890 FARSB, pheT; phenylalanyl-tRNA synthetase beta chain [EC:6.1.1.20]
D DYST_01341; K00812 aspB; aspartate aminotransferase [EC:2.6.1.1]
D DYST_03582; K14260 alaA; alanine-synthesizing transaminase [EC:2.6.1.66 2.6.1.2]
D DYST_03306; K00832 tyrB; aromatic-amino-acid transaminase [EC:2.6.1.57]
D DYST_00248; K14287 ybdL; methionine transaminase [EC:2.6.1.88]
D DYST_01064; K00817 hisC; histidinol-phosphate aminotransferase [EC:2.6.1.9]
D DYST_01320; K00639 kbl, GCAT; glycine C-acetyltransferase [EC:2.3.1.29]
D DYST_02931; K00652 bioF; 8-amino-7-oxononanoate synthase [EC:2.3.1.47]
D DYST_02407; K00821 argD; acetylornithine/N-succinyldiaminopimelate aminotransferase [EC:2.6.1.11 2.6.1.17]
D DYST_01819; K00823 puuE; 4-aminobutyrate aminotransferase [EC:2.6.1.19]
D DYST_02028; K00833 bioA; adenosylmethionine---8-amino-7-oxononanoate aminotransferase [EC:2.6.1.62]
D DYST_02404; K01845 hemL; glutamate-1-semialdehyde 2,1-aminomutase [EC:5.4.3.8]
D DYST_02890; K00826 E2.6.1.42, ilvE; branched-chain amino acid aminotransferase [EC:2.6.1.42]
D DYST_03827; K00826 E2.6.1.42, ilvE; branched-chain amino acid aminotransferase [EC:2.6.1.42]
D DYST_00420; K00831 serC, PSAT1; phosphoserine aminotransferase [EC:2.6.1.52]
D DYST_00643; K13017 wbpE, wlbC; UDP-2-acetamido-2-deoxy-ribo-hexuluronate aminotransferase [EC:2.6.1.98]
C 00199 Cytochrome P450 [BR:ko00199]
D DYST_03159; K17690 CYP3A5; cytochrome P450 family 3 subfamily A5 [EC:1.14.14.1]
C 00194 Photosynthesis proteins [BR:ko00194]
D DYST_03254; K02114 ATPF1E, atpC; F-type H+-transporting ATPase subunit epsilon
D DYST_03253; K02112 ATPF1B, atpD; F-type H+/Na+-transporting ATPase subunit beta [EC:7.1.2.2 7.2.2.1]
D DYST_03252; K02115 ATPF1G, atpG; F-type H+-transporting ATPase subunit gamma
D DYST_03251; K02111 ATPF1A, atpA; F-type H+/Na+-transporting ATPase subunit alpha [EC:7.1.2.2 7.2.2.1]
D DYST_03250; K02113 ATPF1D, atpH; F-type H+-transporting ATPase subunit delta
D DYST_03249; K02109 ATPF0B, atpF; F-type H+-transporting ATPase subunit b
D DYST_03248; K02110 ATPF0C, atpE; F-type H+-transporting ATPase subunit c
D DYST_03247; K02108 ATPF0A, atpB; F-type H+-transporting ATPase subunit a
B
B 09182 Protein families: genetic information processing
C 03000 Transcription factors [BR:ko03000]
D DYST_00210; K00558 DNMT1, dcm; DNA (cytosine-5)-methyltransferase 1 [EC:2.1.1.37]
D DYST_01302; K00558 DNMT1, dcm; DNA (cytosine-5)-methyltransferase 1 [EC:2.1.1.37]
D DYST_03335; K04033 eutR; AraC family transcriptional regulator, ethanolamine operon transcriptional activator
D DYST_00798; K18991 mtrA; AraC family transcriptional regulator, activator of mtrCDE
D DYST_03413; K21746 rclR; AraC family transcriptional regulator, reactive chlorine species (RCS)-specific activator of rcl operon
D DYST_04788; K13652 K13652; AraC family transcriptional regulator
D DYST_03509; K07506 K07506; AraC family transcriptional regulator
D DYST_03812; K10778 ada; AraC family transcriptional regulator, regulatory protein of adaptative response / methylated-DNA-[protein]-cysteine methyltransferase [EC:2.1.1.63]
D DYST_01166; K13529 ada-alkA; AraC family transcriptional regulator, regulatory protein of adaptative response / DNA-3-methyladenine glycosylase II [EC:3.2.2.21]
D DYST_02559; K13530 adaA; AraC family transcriptional regulator, regulatory protein of adaptative response / methylphosphotriester-DNA alkyltransferase methyltransferase [EC:2.1.1.-]
D DYST_03194; K13633 ftrA; AraC family transcriptional regulator, transcriptional activator FtrA
D DYST_01456; K03566 gcvA; LysR family transcriptional regulator, glycine cleavage system transcriptional activator
D DYST_03371; K03566 gcvA; LysR family transcriptional regulator, glycine cleavage system transcriptional activator
D DYST_04048; K04761 oxyR; LysR family transcriptional regulator, hydrogen peroxide-inducible genes activator
D DYST_03989; K05596 iciA; LysR family transcriptional regulator, chromosome initiation inhibitor
D DYST_00533; K05817 hcaR; LysR family transcriptional regulator, hca operon transcriptional activator
D DYST_00745; K11921 cynR; LysR family transcriptional regulator, cyn operon transcriptional activator
D DYST_00032; K13634 cysB; LysR family transcriptional regulator, cys regulon transcriptional activator
D DYST_01137; K14057 abgR; LysR family transcriptional regulator, regulator of abg operon
D DYST_02264; K16135 dmlR; LysR family transcriptional regulator, transcriptional activator for dmlA
D DYST_00732; K18900 bpeT; LysR family transcriptional regulator, regulator for bpeEF and oprC
D DYST_01486; K21698 aaeR; LysR family transcriptional regulator, transcriptional activator for aaeXAB operon
D DYST_03283; K21711 pycR; LysR family transcriptional regulator, putative pyruvate carboxylase regulator
D DYST_01631; K02081 agaR; DeoR family transcriptional regulator, aga operon transcriptional repressor
D DYST_01834; K09012 sufR; DeoR family transcriptional regulator, suf operon transcriptional repressor
D DYST_00357; K02529 lacI, galR; LacI family transcriptional regulator
D DYST_00556; K02529 lacI, galR; LacI family transcriptional regulator
D DYST_02491; K02529 lacI, galR; LacI family transcriptional regulator
D DYST_02856; K02529 lacI, galR; LacI family transcriptional regulator
D DYST_02884; K02529 lacI, galR; LacI family transcriptional regulator
D DYST_03971; K02529 lacI, galR; LacI family transcriptional regulator
D DYST_01537; K05499 cytR; LacI family transcriptional regulator, repressor for deo operon, udp, cdd, tsx, nupC, and nupG
D DYST_02464; K02043 phnF; GntR family transcriptional regulator, phosphonate transport system regulatory protein
D DYST_03175; K24967 nagR; GntR family transcriptional regulator, N-acetylglucosamine utilization regulator
D DYST_00568; K05799 pdhR; GntR family transcriptional regulator, transcriptional repressor for pyruvate dehydrogenase complex
D DYST_02470; K00375 K00375; GntR family transcriptional regulator / MocR family aminotransferase
D DYST_04378; K00375 K00375; GntR family transcriptional regulator / MocR family aminotransferase
D DYST_00044; K07979 ytrA; GntR family transcriptional regulator
D DYST_00541; K16137 nemR; TetR/AcrR family transcriptional regulator, transcriptional repressor for nem operon
D DYST_01142; K16137 nemR; TetR/AcrR family transcriptional regulator, transcriptional repressor for nem operon
D DYST_01483; K16137 nemR; TetR/AcrR family transcriptional regulator, transcriptional repressor for nem operon
D DYST_01124; K16138 uidR; TetR/AcrR family transcriptional regulator, repressor for uid operon
D DYST_02432; K18301 mexL; TetR/AcrR family transcriptional regulator, mexJK operon transcriptional repressor
D DYST_01383; K23777 cecR; TetR/AcrR family transcriptional regulator, regulator of cefoperazone and chloramphenicol sensitivity
D DYST_02690; K24699 mftR; TetR/AcrR family transcriptional regulator, regulator of mycofactocin system
D DYST_02828; K03719 lrp; Lrp/AsnC family transcriptional regulator, leucine-responsive regulatory protein
D DYST_01080; K03556 malT; LuxR family transcriptional regulator, maltose regulon positive regulatory protein
D DYST_02695; K06075 slyA; MarR family transcriptional regulator, transcriptional regulator for hemolysin
D DYST_03800; K06075 slyA; MarR family transcriptional regulator, transcriptional regulator for hemolysin
D DYST_03296; K15974 emrR, mprA; MarR family transcriptional regulator, negative regulator of the multidrug operon emrRAB
D DYST_01730; K23775 ohrR; MarR family transcriptional regulator, organic hydroperoxide resistance regulator
D DYST_01113; K19591 cueR; MerR family transcriptional regulator, copper efflux regulator
D DYST_03437; K13639 soxR; MerR family transcriptional regulator, redox-sensitive transcriptional activator SoxR
D DYST_01339; K21743 mta; MerR family transcriptional regulator, multidrug-efflux activator
D DYST_00094; K03711 fur, zur, furB; Fur family transcriptional regulator, ferric uptake regulator
D DYST_01191; K09823 zur; Fur family transcriptional regulator, zinc uptake regulator
D DYST_00789; K10914 crp; CRP/FNR family transcriptional regulator, cyclic AMP receptor protein
D DYST_03681; K10914 crp; CRP/FNR family transcriptional regulator, cyclic AMP receptor protein
D DYST_00824; K01420 fnr; CRP/FNR family transcriptional regulator, anaerobic regulatory protein
D DYST_01844; K13772 rirA; Rrf2 family transcriptional regulator, iron-responsive regulator
D DYST_02712; K21886 nmtR; ArsR family transcriptional regulator, nickel/cobalt-responsive transcriptional repressor
D DYST_01358; K10947 padR; PadR family transcriptional regulator, regulatory protein PadR
D DYST_03672; K15835 murR; RpiR family transcriptional regulator, murPQ operon repressor
D DYST_02601; K02171 blaI; BlaI family transcriptional regulator, penicillinase repressor
D DYST_02192; K03524 birA; BirA family transcriptional regulator, biotin operon repressor / biotin---[acetyl-CoA-carboxylase] ligase [EC:6.3.4.15]
D DYST_02481; K03557 fis; Fis family transcriptional regulator, factor for inversion stimulation protein
D DYST_03577; K07724 ner, nlp, sfsB; Ner family transcriptional regulator
D DYST_04303; K10941 flrA, fleQ, flaK; sigma-54 dependent transcriptional regulator, flagellar regulatory protein
D DYST_00548; K02019 modE; molybdate transport system regulatory protein
D DYST_00211; K07726 K07726; putative transcriptional regulator
D DYST_00252; K07727 K07727; putative transcriptional regulator
D DYST_02686; K07727 K07727; putative transcriptional regulator
D DYST_02565; K07729 K07729; putative transcriptional regulator
D DYST_02106; K03764 metJ; MetJ family transcriptional regulator, methionine regulon repressor
D DYST_03458; K13821 putA; RHH-type transcriptional regulator, proline utilization regulon repressor / proline dehydrogenase / delta 1-pyrroline-5-carboxylate dehydrogenase [EC:1.5.5.2 1.2.1.88]
D DYST_01402; K23239 frmR; FrmR/RcnR family transcriptional regulator, repressor of frmRAB operon
D DYST_00201; K03497 parB, spo0J; ParB family transcriptional regulator, chromosome partitioning protein
D DYST_03133; K03497 parB, spo0J; ParB family transcriptional regulator, chromosome partitioning protein
D DYST_00098; K03705 hrcA; heat-inducible transcriptional repressor
D DYST_02947; K22486 hilA; transcriptional regulator HilA, main transcriptional regulator of SPI1
D DYST_04611; K03567 gcvR; glycine cleavage system transcriptional repressor
D DYST_00400; K06140 rnk; regulator of nucleoside diphosphate kinase
D DYST_01681; K07734 paiB; transcriptional regulator
D DYST_02040; K07735 algH; putative transcriptional regulator
D DYST_01686; K06204 dksA; DnaK suppressor protein
D DYST_04220; K07738 nrdR; transcriptional repressor NrdR
D DYST_03887; K03925 mraZ; transcriptional regulator MraZ
C 03021 Transcription machinery [BR:ko03021]
D DYST_04444; K03040 rpoA; DNA-directed RNA polymerase subunit alpha [EC:2.7.7.6]
D DYST_04413; K03043 rpoB; DNA-directed RNA polymerase subunit beta [EC:2.7.7.6]
D DYST_04414; K03046 rpoC; DNA-directed RNA polymerase subunit beta' [EC:2.7.7.6]
D DYST_03778; K03060 rpoZ; DNA-directed RNA polymerase subunit omega [EC:2.7.7.6]
D DYST_03199; K03086 rpoD; RNA polymerase primary sigma factor
D DYST_00635; K03088 rpoE; RNA polymerase sigma-70 factor, ECF subfamily
D DYST_00846; K03088 rpoE; RNA polymerase sigma-70 factor, ECF subfamily
D DYST_00874; K03088 rpoE; RNA polymerase sigma-70 factor, ECF subfamily
D DYST_01745; K03088 rpoE; RNA polymerase sigma-70 factor, ECF subfamily
D DYST_01760; K03088 rpoE; RNA polymerase sigma-70 factor, ECF subfamily
D DYST_01777; K03088 rpoE; RNA polymerase sigma-70 factor, ECF subfamily
D DYST_02092; K03088 rpoE; RNA polymerase sigma-70 factor, ECF subfamily
D DYST_02638; K03088 rpoE; RNA polymerase sigma-70 factor, ECF subfamily
D DYST_03310; K03088 rpoE; RNA polymerase sigma-70 factor, ECF subfamily
D DYST_04360; K03088 rpoE; RNA polymerase sigma-70 factor, ECF subfamily
D DYST_04606; K03088 rpoE; RNA polymerase sigma-70 factor, ECF subfamily
D DYST_03012; K23514 fecI, prhI; RNA polymerase sigma-19 factor, ECF subfamily
D DYST_02302; K03089 rpoH; RNA polymerase sigma-32 factor
D DYST_04132; K03092 rpoN; RNA polymerase sigma-54 factor
D DYST_04324; K02405 fliA, whiG; RNA polymerase sigma factor FliA
D DYST_01792; K03580 hepA; ATP-dependent helicase HepA [EC:3.6.4.-]
D DYST_04231; K03625 nusB; transcription antitermination protein NusB
D DYST_04408; K02601 nusG; transcription termination/antitermination protein NusG
D DYST_01960; K03599 sspA, mglA; stringent starvation protein A
D DYST_01959; K03600 sspB; stringent starvation protein B
D DYST_01686; K06204 dksA; DnaK suppressor protein
D DYST_00110; K03624 greA; transcription elongation factor GreA
D DYST_01223; K04760 greB; transcription elongation factor GreB
D DYST_02309; K03628 rho; transcription termination factor Rho
C 03019 Messenger RNA biogenesis [BR:ko03019]
D DYST_00216; K08300 rne; ribonuclease E [EC:3.1.26.12]
D DYST_04455; K08301 rng, cafA; ribonuclease G [EC:3.1.26.-]
D DYST_00867; K03685 rnc, DROSHA, RNT1; ribonuclease III [EC:3.1.26.3]
D DYST_01265; K12573 rnr, vacB; ribonuclease R [EC:3.1.13.1]
D DYST_00269; K13288 orn, REX2, REXO2; oligoribonuclease [EC:3.1.-.-]
D DYST_02307; K03732 rhlB; ATP-dependent RNA helicase RhlB [EC:3.6.4.13]
D DYST_01735; K11927 rhlE; ATP-dependent RNA helicase RhlE [EC:3.6.4.13]
D DYST_01740; K05592 deaD, cshA; ATP-dependent RNA helicase DeaD [EC:3.6.4.13]
D DYST_04153; K03654 recQ; ATP-dependent DNA helicase RecQ [EC:3.6.4.12]
D DYST_01031; K01689 ENO, eno; enolase [EC:4.2.1.11]
D DYST_00007; K00962 pnp, PNPT1; polyribonucleotide nucleotidyltransferase [EC:2.7.7.8]
D DYST_02309; K03628 rho; transcription termination factor Rho
D DYST_00100; K04043 dnaK, HSPA9; molecular chaperone DnaK
D DYST_02457; K04077 groEL, HSPD1; chaperonin GroEL
D DYST_01311; K03666 hfq; host factor-I protein
D DYST_04597; K00937 ppk1; polyphosphate kinase [EC:2.7.4.1]
D DYST_04791; K00937 ppk1; polyphosphate kinase [EC:2.7.4.1]
D DYST_04387; K22468 ppk2; polyphosphate kinase [EC:2.7.4.34]
D DYST_04616; K00970 pcnB; poly(A) polymerase [EC:2.7.7.19]
D DYST_03233; K08311 nudH; putative (di)nucleoside polyphosphate hydrolase [EC:3.6.1.-]
D DYST_04590; K03563 csrA; carbon storage regulator
D DYST_04129; K06958 rapZ; RNase adapter protein RapZ
C 03041 Spliceosome [BR:ko03041]
C 03011 Ribosome [BR:ko03011]
D DYST_04489; K02967 RP-S2, MRPS2, rpsB; small subunit ribosomal protein S2
D DYST_04437; K02988 RP-S5, MRPS5, rpsE; small subunit ribosomal protein S5
D DYST_01714; K02990 RP-S6, MRPS6, rpsF; small subunit ribosomal protein S6
D DYST_04416; K02992 RP-S7, MRPS7, rpsG; small subunit ribosomal protein S7
D DYST_03686; K02996 RP-S9, MRPS9, rpsI; small subunit ribosomal protein S9
D DYST_04419; K02946 RP-S10, MRPS10, rpsJ; small subunit ribosomal protein S10
D DYST_04442; K02948 RP-S11, MRPS11, rpsK; small subunit ribosomal protein S11
D DYST_04415; K02950 RP-S12, MRPS12, rpsL; small subunit ribosomal protein S12
D DYST_04433; K02954 RP-S14, MRPS14, rpsN; small subunit ribosomal protein S14
D DYST_00006; K02956 RP-S15, MRPS15, rpsO; small subunit ribosomal protein S15
D DYST_04429; K02961 RP-S17, MRPS17, rpsQ; small subunit ribosomal protein S17
D DYST_01713; K02963 RP-S18, MRPS18, rpsR; small subunit ribosomal protein S18
D DYST_03482; K02970 RP-S21, MRPS21, rpsU; small subunit ribosomal protein S21
D DYST_04410; K02863 RP-L1, MRPL1, rplA; large subunit ribosomal protein L1
D DYST_04423; K02886 RP-L2, MRPL2, rplB; large subunit ribosomal protein L2
D DYST_04420; K02906 RP-L3, MRPL3, rplC; large subunit ribosomal protein L3
D DYST_04421; K02926 RP-L4, MRPL4, rplD; large subunit ribosomal protein L4
D DYST_04432; K02931 RP-L5, MRPL5, rplE; large subunit ribosomal protein L5
D DYST_04435; K02933 RP-L6, MRPL6, rplF; large subunit ribosomal protein L6
D DYST_01712; K02939 RP-L9, MRPL9, rplI; large subunit ribosomal protein L9
D DYST_04411; K02864 RP-L10, MRPL10, rplJ; large subunit ribosomal protein L10
D DYST_04409; K02867 RP-L11, MRPL11, rplK; large subunit ribosomal protein L11
D DYST_04412; K02935 RP-L7, MRPL12, rplL; large subunit ribosomal protein L7/L12
D DYST_03685; K02871 RP-L13, MRPL13, rplM; large subunit ribosomal protein L13
D DYST_04430; K02874 RP-L14, MRPL14, rplN; large subunit ribosomal protein L14
D DYST_04439; K02876 RP-L15, MRPL15, rplO; large subunit ribosomal protein L15
D DYST_04427; K02878 RP-L16, MRPL16, rplP; large subunit ribosomal protein L16
D DYST_04445; K02879 RP-L17, MRPL17, rplQ; large subunit ribosomal protein L17
D DYST_04436; K02881 RP-L18, MRPL18, rplR; large subunit ribosomal protein L18
D DYST_01699; K02884 RP-L19, MRPL19, rplS; large subunit ribosomal protein L19
D DYST_01929; K02887 RP-L20, MRPL20, rplT; large subunit ribosomal protein L20
D DYST_04638; K02888 RP-L21, MRPL21, rplU; large subunit ribosomal protein L21
D DYST_04425; K02890 RP-L22, MRPL22, rplV; large subunit ribosomal protein L22
D DYST_04422; K02892 RP-L23, MRPL23, rplW; large subunit ribosomal protein L23
D DYST_04431; K02895 RP-L24, MRPL24, rplX; large subunit ribosomal protein L24
D DYST_04639; K02899 RP-L27, MRPL27, rpmA; large subunit ribosomal protein L27
D DYST_02800; K02902 RP-L28, MRPL28, rpmB; large subunit ribosomal protein L28
D DYST_04893; K02911 RP-L32, MRPL32, rpmF; large subunit ribosomal protein L32
D DYST_02801; K02913 RP-L33, MRPL33, rpmG; large subunit ribosomal protein L33
D DYST_03092; K02914 RP-L34, MRPL34, rpmH; large subunit ribosomal protein L34
D DYST_01930; K02916 RP-L35, MRPL35, rpmI; large subunit ribosomal protein L35
D DYST_00115; K02945 RP-S1, rpsA; small subunit ribosomal protein S1
D DYST_04426; K02982 RP-S3, rpsC; small subunit ribosomal protein S3
D DYST_04443; K02986 RP-S4, rpsD; small subunit ribosomal protein S4
D DYST_04434; K02994 RP-S8, rpsH; small subunit ribosomal protein S8
D DYST_04441; K02952 RP-S13, rpsM; small subunit ribosomal protein S13
D DYST_04424; K02965 RP-S19, rpsS; small subunit ribosomal protein S19
D DYST_04642; K02968 RP-S20, rpsT; small subunit ribosomal protein S20
D DYST_04397; K02897 RP-L25, rplY; large subunit ribosomal protein L25
D DYST_04428; K02904 RP-L29, rpmC; large subunit ribosomal protein L29
D DYST_03784; K02909 RP-L31, rpmE; large subunit ribosomal protein L31
C 03009 Ribosome biogenesis [BR:ko03009]
D DYST_00867; K03685 rnc, DROSHA, RNT1; ribonuclease III [EC:3.1.26.3]
D DYST_02918; K07178 RIOK1; RIO kinase 1 [EC:2.7.11.1]
D DYST_00269; K13288 orn, REX2, REXO2; oligoribonuclease [EC:3.1.-.-]
D DYST_00866; K03595 era, ERAL1; GTPase
D DYST_04641; K03979 obgE, cgtA, MTG2; GTPase [EC:3.6.5.-]
D DYST_01686; K06204 dksA; DnaK suppressor protein
D DYST_04231; K03625 nusB; transcription antitermination protein NusB
D DYST_04408; K02601 nusG; transcription termination/antitermination protein NusG
D DYST_04524; K06183 rsuA; 16S rRNA pseudouridine516 synthase [EC:5.4.99.19]
D DYST_03907; K02528 ksgA; 16S rRNA (adenine1518-N6/adenine1519-N6)-dimethyltransferase [EC:2.1.1.182]
D DYST_03214; K03500 rsmB, sun; 16S rRNA (cytosine967-C5)-methyltransferase [EC:2.1.1.176]
D DYST_04523; K00564 rsmC; 16S rRNA (guanine1207-N2)-methyltransferase [EC:2.1.1.172]
D DYST_04169; K08316 rsmD; 16S rRNA (guanine966-N2)-methyltransferase [EC:2.1.1.171]
D DYST_02030; K09761 rsmE; 16S rRNA (uracil1498-N3)-methyltransferase [EC:2.1.1.193]
D DYST_03131; K03501 gidB, rsmG; 16S rRNA (guanine527-N7)-methyltransferase [EC:2.1.1.170]
D DYST_03888; K03438 mraW, rsmH; 16S rRNA (cytosine1402-N4)-methyltransferase [EC:2.1.1.199]
D DYST_03885; K07056 rsmI; 16S rRNA (cytidine1402-2'-O)-methyltransferase [EC:2.1.1.198]
D DYST_01264; K03218 rlmB; 23S rRNA (guanosine2251-2'-O)-methyltransferase [EC:2.1.1.185]
D DYST_01019; K02427 rlmE, rrmJ, ftsJ; 23S rRNA (uridine2552-2'-O)-methyltransferase [EC:2.1.1.166]
D DYST_01756; K00783 rlmH; 23S rRNA (pseudouridine1915-N3)-methyltransferase [EC:2.1.1.177]
D DYST_02515; K06969 rlmI; 23S rRNA (cytosine1962-C5)-methyltransferase [EC:2.1.1.191]
D DYST_01433; K07115 rlmJ; 23S rRNA (adenine2030-N6)-methyltransferase [EC:2.1.1.266]
D DYST_04780; K12297 rlmKL; 23S rRNA (guanine2069-N7)-methyltransferase / 23S rRNA (guanine2445-N2)-methyltransferase [EC:2.1.1.264 2.1.1.173]
D DYST_00442; K06941 rlmN; 23S rRNA (adenine2503-C2)-methyltransferase [EC:2.1.1.192]
D DYST_00861; K03215 rumA; 23S rRNA (uracil1939-C5)-methyltransferase [EC:2.1.1.190]
D DYST_04522; K06177 rluA; tRNA pseudouridine32 synthase / 23S rRNA pseudouridine746 synthase [EC:5.4.99.28 5.4.99.29]
D DYST_00254; K06178 rluB; 23S rRNA pseudouridine2605 synthase [EC:5.4.99.22]
D DYST_01321; K06178 rluB; 23S rRNA pseudouridine2605 synthase [EC:5.4.99.22]
D DYST_00218; K06179 rluC; 23S rRNA pseudouridine955/2504/2580 synthase [EC:5.4.99.24]
D DYST_03996; K06180 rluD; 23S rRNA pseudouridine1911/1915/1917 synthase [EC:5.4.99.23]
D DYST_03373; K06181 rluE; 23S rRNA pseudouridine2457 synthase [EC:5.4.99.20]
D DYST_02575; K06182 rluF; 23S rRNA pseudouridine2604 synthase [EC:5.4.99.21]
D DYST_02644; K06182 rluF; 23S rRNA pseudouridine2604 synthase [EC:5.4.99.21]
D DYST_04268; K03789 rimI; [ribosomal protein S18]-alanine N-acetyltransferase [EC:2.3.1.266]
D DYST_01216; K03790 rimJ; [ribosomal protein S5]-alanine N-acetyltransferase [EC:2.3.1.267]
D DYST_01737; K03790 rimJ; [ribosomal protein S5]-alanine N-acetyltransferase [EC:2.3.1.267]
D DYST_03823; K05844 rimK; ribosomal protein S6--L-glutamate ligase [EC:6.3.2.-]
D DYST_00450; K03817 rimL; ribosomal-protein-serine acetyltransferase [EC:2.3.1.-]
D DYST_01701; K02860 rimM; 16S rRNA processing protein RimM
D DYST_01227; K14441 rimO; ribosomal protein S12 methylthiotransferase [EC:2.8.4.4]
D DYST_02479; K02687 prmA; ribosomal protein L11 methyltransferase [EC:2.1.1.-]
D DYST_01217; K07320 prmB; ribosomal protein L3 glutamine methyltransferase [EC:2.1.1.298]
D DYST_00026; K18850 ycfD; 50S ribosomal protein L16 3-hydroxylase [EC:1.14.11.47]
D DYST_00216; K08300 rne; ribonuclease E [EC:3.1.26.12]
D DYST_04455; K08301 rng, cafA; ribonuclease G [EC:3.1.26.-]
D DYST_02041; K07447 ruvX; putative pre-16S rRNA nuclease [EC:3.1.-.-]
D DYST_01740; K05592 deaD, cshA; ATP-dependent RNA helicase DeaD [EC:3.6.4.13]
D DYST_02579; K05591 dbpA; ATP-dependent RNA helicase DbpA [EC:3.6.4.13]
D DYST_02325; K06949 rsgA, engC; ribosome biogenesis GTPase / thiamine phosphate phosphatase [EC:3.6.1.- 3.1.3.100]
D DYST_03583; K06949 rsgA, engC; ribosome biogenesis GTPase / thiamine phosphate phosphatase [EC:3.6.1.- 3.1.3.100]
D DYST_00448; K03977 engA, der; GTPase
D DYST_01310; K03665 hflX; GTPase
D DYST_03220; K07566 tsaC, rimN, SUA5; L-threonylcarbamoyladenylate synthase [EC:2.7.7.87]
D DYST_03780; K01139 spoT; GTP diphosphokinase / guanosine-3',5'-bis(diphosphate) 3'-diphosphatase [EC:2.7.6.5 3.1.7.2]
D DYST_00003; K02834 rbfA; ribosome-binding factor A
D DYST_04922; K09748 rimP; ribosome maturation factor RimP
D DYST_01757; K09710 ybeB; ribosome-associated protein
D DYST_01969; K07042 ybeY, yqfG; probable rRNA maturation factor
D DYST_01020; K07574 yhbY; RNA-binding protein
D DYST_04461; K09889 yjgA; ribosome-associated protein
D DYST_04131; K05808 yhbH; putative sigma-54 modulation protein
D DYST_04399; K06942 ychF; ribosome-binding ATPase
C 03016 Transfer RNA biogenesis [BR:ko03016]
D DYST_03492; K00974 cca; tRNA nucleotidyltransferase (CCA-adding enzyme) [EC:2.7.7.72 3.1.3.- 3.1.4.-]
D DYST_01200; K01885 EARS, gltX; glutamyl-tRNA synthetase [EC:6.1.1.17]
D DYST_04264; K01881 PARS, proS; prolyl-tRNA synthetase [EC:6.1.1.15]
D DYST_04645; K01870 IARS, ileS; isoleucyl-tRNA synthetase [EC:6.1.1.5]
D DYST_01768; K01869 LARS, leuS; leucyl-tRNA synthetase [EC:6.1.1.4]
D DYST_01239; K01874 MARS, metG; methionyl-tRNA synthetase [EC:6.1.1.10]
D DYST_04043; K01886 QARS, glnS; glutaminyl-tRNA synthetase [EC:6.1.1.18]
D DYST_02981; K01887 RARS, argS; arginyl-tRNA synthetase [EC:6.1.1.19]
D DYST_00381; K04567 KARS, lysS; lysyl-tRNA synthetase, class II [EC:6.1.1.6]
D DYST_04018; K01876 DARS2, aspS; aspartyl-tRNA synthetase [EC:6.1.1.12]
D DYST_04589; K01872 AARS, alaS; alanyl-tRNA synthetase [EC:6.1.1.7]
D DYST_01716; K01893 NARS, asnS; asparaginyl-tRNA synthetase [EC:6.1.1.22]
D DYST_01932; K01868 TARS, thrS; threonyl-tRNA synthetase [EC:6.1.1.3]
D DYST_00796; K01875 SARS, serS; seryl-tRNA synthetase [EC:6.1.1.11]
D DYST_01684; K01883 CARS, cysS; cysteinyl-tRNA synthetase [EC:6.1.1.16]
D DYST_04269; K01873 VARS, valS; valyl-tRNA synthetase [EC:6.1.1.9]
D DYST_01073; K01892 HARS, hisS; histidyl-tRNA synthetase [EC:6.1.1.21]
D DYST_01928; K01889 FARSA, pheS; phenylalanyl-tRNA synthetase alpha chain [EC:6.1.1.20]
D DYST_01927; K01890 FARSB, pheT; phenylalanyl-tRNA synthetase beta chain [EC:6.1.1.20]
D DYST_02965; K01866 YARS, tyrS; tyrosyl-tRNA synthetase [EC:6.1.1.1]
D DYST_02183; K01867 WARS, trpS; tryptophanyl-tRNA synthetase [EC:6.1.1.2]
D DYST_03200; K07560 dtd, DTD; D-aminoacyl-tRNA deacylase [EC:3.1.1.96]
D DYST_03816; K03439 trmB, METTL1, TRM8; tRNA (guanine-N7-)-methyltransferase [EC:2.1.1.33]
D DYST_01210; K06173 truA, PUS1; tRNA pseudouridine38-40 synthase [EC:5.4.99.12]
D DYST_00004; K03177 truB, PUS4, TRUB1; tRNA pseudouridine55 synthase [EC:5.4.99.25]
D DYST_01027; K06176 truD, PUS7; tRNA pseudouridine13 synthase [EC:5.4.99.27]
D DYST_01271; K11996 MOCS3, UBA4; adenylyltransferase and sulfurtransferase [EC:2.7.7.80 2.8.1.11]
D DYST_03483; K01409 KAE1, tsaD, QRI7; N6-L-threonylcarbamoyladenine synthase [EC:2.3.1.234]
D DYST_03220; K07566 tsaC, rimN, SUA5; L-threonylcarbamoyladenylate synthase [EC:2.7.7.87]
D DYST_01312; K00791 miaA, TRIT1; tRNA dimethylallyltransferase [EC:2.5.1.75]
D DYST_03095; K03650 mnmE, trmE, MSS1; tRNA modification GTPase [EC:3.6.-.-]
D DYST_02945; K03495 gidA, mnmG, MTO1; tRNA uridine 5-carboxymethylaminomethyl modification enzyme
D DYST_01527; K01008 selD, SEPHS; selenide, water dikinase [EC:2.7.9.3]
D DYST_02022; K01082 cysQ, MET22, BPNT1; 3'(2'), 5'-bisphosphate nucleotidase [EC:3.1.3.7]
D DYST_03093; K03536 rnpA; ribonuclease P protein component [EC:3.1.26.5]
D DYST_01254; K03683 rnt; ribonuclease T [EC:3.1.13.-]
D DYST_03768; K00989 rph; ribonuclease PH [EC:2.7.7.56]
D DYST_00908; K03684 rnd; ribonuclease D [EC:3.1.13.5]
D DYST_04215; K06020 ettA; energy-dependent translational throttle protein EttA
D DYST_02954; K01878 glyQ; glycyl-tRNA synthetase alpha chain [EC:6.1.1.14]
D DYST_02953; K01879 glyS; glycyl-tRNA synthetase beta chain [EC:6.1.1.14]
D DYST_04573; K01894 gluQ; glutamyl-Q tRNA(Asp) synthetase [EC:6.1.1.-]
D DYST_00457; K11991 tadA; tRNA(adenine34) deaminase [EC:3.5.4.33]
D DYST_02198; K05539 dusA; tRNA-dihydrouridine synthase A [EC:1.-.-.-]
D DYST_03857; K05540 dusB; tRNA-dihydrouridine synthase B [EC:1.-.-.-]
D DYST_01966; K06168 miaB; tRNA-2-methylthio-N6-dimethylallyladenosine synthase [EC:2.8.4.3]
D DYST_00649; K06219 smtA, cmoM; tRNA 5-carboxymethoxyuridine methyltransferase [EC:2.1.1.-]
D DYST_01700; K00554 trmD; tRNA (guanine37-N1)-methyltransferase [EC:2.1.1.228]
D DYST_04147; K15396 trmJ; tRNA (cytidine32/uridine32-2'-O)-methyltransferase [EC:2.1.1.200]
D DYST_03292; K03216 trmL, cspR; tRNA (cytidine/uridine-2'-O-)-methyltransferase [EC:2.1.1.207]
D DYST_03287; K06175 truC; tRNA pseudouridine65 synthase [EC:5.4.99.26]
D DYST_04522; K06177 rluA; tRNA pseudouridine32 synthase / 23S rRNA pseudouridine746 synthase [EC:5.4.99.28 5.4.99.29]
D DYST_00408; K00566 mnmA, trmU; tRNA-uridine 2-sulfurtransferase [EC:2.8.1.13]
D DYST_03305; K14058 ttcA; tRNA 2-thiocytidine biosynthesis protein TtcA
D DYST_01715; K13628 iscA; iron-sulfur cluster assembly protein
D DYST_04856; K06980 ygfZ; tRNA-modifying protein YgfZ
D DYST_01905; K07568 queA; S-adenosylmethionine:tRNA ribosyltransferase-isomerase [EC:2.4.99.17]
D DYST_04033; K06920 queC; 7-cyano-7-deazaguanine synthase [EC:6.3.4.20]
D DYST_03244; K01737 queD, ptpS, PTS; 6-pyruvoyltetrahydropterin/6-carboxytetrahydropterin synthase [EC:4.2.3.12 4.1.2.50]
D DYST_04032; K10026 queE; 7-carboxy-7-deazaguanine synthase [EC:4.3.99.3]
D DYST_02708; K06879 queF; 7-cyano-7-deazaguanine reductase [EC:1.7.1.13]
D DYST_04622; K18979 queG; epoxyqueuosine reductase [EC:1.17.99.6]
D DYST_01858; K00773 tgt; queuine tRNA-ribosyltransferase [EC:2.4.2.29]
D DYST_04469; K04075 tilS, mesJ; tRNA(Ile)-lysidine synthase [EC:6.3.4.19]
D DYST_04119; K14742 tsaB; tRNA threonylcarbamoyladenosine biosynthesis protein TsaB
D DYST_04625; K06925 tsaE; tRNA threonylcarbamoyladenosine biosynthesis protein TsaE
D DYST_04571; K22132 tcdA; tRNA threonylcarbamoyladenosine dehydratase
D DYST_01265; K12573 rnr, vacB; ribonuclease R [EC:3.1.13.1]
D DYST_00007; K00962 pnp, PNPT1; polyribonucleotide nucleotidyltransferase [EC:2.7.7.8]
C 03012 Translation factors [BR:ko03012]
D DYST_00002; K02519 infB, MTIF2; translation initiation factor IF-2
D DYST_01931; K02520 infC, MTIF3; translation initiation factor IF-3
D DYST_00229; K06158 ABCF3; ATP-binding cassette, subfamily F, member 3
D DYST_00468; K03234 EEF2; elongation factor 2
D DYST_04488; K02357 tsf, TSFM; elongation factor Ts
D DYST_04405; K02358 tuf, TUFM; elongation factor Tu
D DYST_04418; K02358 tuf, TUFM; elongation factor Tu
D DYST_04072; K02355 fusA, GFM, EFG; elongation factor G
D DYST_04417; K02355 fusA, GFM, EFG; elongation factor G
D DYST_04390; K02835 prfA, MTRF1, MRF1; peptide chain release factor 1
D DYST_04486; K02838 frr, MRRF, RRF; ribosome recycling factor
D DYST_04061; K02493 hemK, prmC, HEMK; release factor glutamine methyltransferase [EC:2.1.1.297]
D DYST_04398; K01056 PTH1, pth, spoVC; peptidyl-tRNA hydrolase, PTH1 family [EC:3.1.1.29]
D DYST_00417; K02518 infA; translation initiation factor IF-1
D DYST_01661; K02356 efp; elongation factor P
D DYST_01696; K02356 efp; elongation factor P
D DYST_00403; K04568 epmA, poxA; elongation factor P--(R)-beta-lysine ligase [EC:6.3.1.-]
D DYST_01697; K19810 epmB; L-lysine 2,3-aminomutase [EC:5.4.3.-]
D DYST_00379; K02836 prfB; peptide chain release factor 2
D DYST_02081; K02837 prfC; peptide chain release factor 3
D DYST_03286; K15034 yaeJ; ribosome-associated protein
C 03110 Chaperones and folding catalysts [BR:ko03110]
D DYST_00411; K03694 clpA; ATP-dependent Clp protease ATP-binding subunit ClpA
D DYST_04002; K03695 clpB; ATP-dependent Clp protease ATP-binding subunit ClpB
D DYST_00903; K03544 clpX, CLPX; ATP-dependent Clp protease ATP-binding subunit ClpX
D DYST_03104; K03667 hslU; ATP-dependent HslUV protease ATP-binding subunit HslU
D DYST_04575; K04079 HSP90A, htpG; molecular chaperone HtpG
D DYST_00100; K04043 dnaK, HSPA9; molecular chaperone DnaK
D DYST_01633; K04045 hscC; molecular chaperone HscC
D DYST_01585; K04046 yegD; hypothetical chaperone protein
D DYST_02457; K04077 groEL, HSPD1; chaperonin GroEL
D DYST_00101; K03686 dnaJ; molecular chaperone DnaJ
D DYST_00018; K05516 cbpA; curved DNA-binding protein
D DYST_03651; K05801 djlA; DnaJ like chaperone protein
D DYST_02097; K04083 hslO; molecular chaperone Hsp33
D DYST_00099; K03687 GRPE; molecular chaperone GrpE
D DYST_02732; K04080 ibpA; molecular chaperone IbpA
D DYST_04578; K04762 hslR; ribosome-associated heat shock protein Hsp15
D DYST_02458; K04078 groES, HSPE1; chaperonin GroES
D DYST_00871; K04771 degP, htrA; serine protease Do [EC:3.4.21.107]
D DYST_02372; K04771 degP, htrA; serine protease Do [EC:3.4.21.107]
D DYST_01018; K03798 ftsH, hflB; cell division protease FtsH [EC:3.4.24.-]
D DYST_03247; K02108 ATPF0A, atpB; F-type H+-transporting ATPase subunit a
D DYST_04086; K07346 fimC; fimbrial chaperone protein
D DYST_02799; K03071 secB; preprotein translocase subunit SecB
D DYST_04763; K09796 pccA; periplasmic copper chaperone A
D DYST_00633; K01342 aprE; subtilisin [EC:3.4.21.62]
D DYST_03346; K01336 E3.4.21.48; cerevisin [EC:3.4.21.48]
D DYST_02705; K14645 K14645; serine protease [EC:3.4.21.-]
D DYST_03434; K01279 TPP1, CLN2; tripeptidyl-peptidase I [EC:3.4.14.9]
D DYST_00560; K12373 HEXA_B; hexosaminidase [EC:3.2.1.52]
D DYST_02840; K12373 HEXA_B; hexosaminidase [EC:3.2.1.52]
D DYST_04595; K03767 PPIA; peptidyl-prolyl cis-trans isomerase A (cyclophilin A) [EC:5.2.1.8]
D DYST_01344; K03768 PPIB, ppiB; peptidyl-prolyl cis-trans isomerase B (cyclophilin B) [EC:5.2.1.8]
D DYST_00899; K03770 ppiD; peptidyl-prolyl cis-trans isomerase D [EC:5.2.1.8]
D DYST_00881; K03772 fkpA; FKBP-type peptidyl-prolyl cis-trans isomerase FkpA [EC:5.2.1.8]
D DYST_04630; K03773 fklB; FKBP-type peptidyl-prolyl cis-trans isomerase FklB [EC:5.2.1.8]
D DYST_04557; K03775 slyD; FKBP-type peptidyl-prolyl cis-trans isomerase SlyD [EC:5.2.1.8]
D DYST_03909; K03771 surA; peptidyl-prolyl cis-trans isomerase SurA [EC:5.2.1.8]
D DYST_02308; K03671 trxA; thioredoxin 1
D DYST_04528; K03672 trxC; thioredoxin 2 [EC:1.8.1.8]
D DYST_01773; K05838 ybbN; putative thioredoxin
D DYST_04601; K03676 grxC, GLRX, GLRX2; glutaredoxin 3
D DYST_01950; K07390 grxD, GLRX5; monothiol glutaredoxin
D DYST_03525; K07390 grxD, GLRX5; monothiol glutaredoxin
D DYST_03498; K03673 dsbA; protein dithiol oxidoreductase (disulfide-forming) [EC:1.8.4.15]
D DYST_03499; K03673 dsbA; protein dithiol oxidoreductase (disulfide-forming) [EC:1.8.4.15]
D DYST_04447; K03611 dsbB; protein dithiol:quinone oxidoreductase [EC:1.8.5.9]
D DYST_04181; K03981 dsbC; thiol:disulfide interchange protein DsbC [EC:5.3.4.1]
D DYST_02473; K04084 dsbD, dipZ; thioredoxin:protein disulfide reductase [EC:1.8.4.16]
D DYST_04837; K02199 ccmG, dsbE; cytochrome c biogenesis protein CcmG, thiol:disulfide interchange protein DsbE
C 04131 Membrane trafficking [BR:ko04131]
D DYST_04703; K08796 BRSK; BR serine/threonine kinase [EC:2.7.11.1]
D DYST_00441; K00940 ndk, NME; nucleoside-diphosphate kinase [EC:2.7.4.6]
D DYST_02156; K01623 ALDO; fructose-bisphosphate aldolase, class I [EC:4.1.2.13]
D DYST_02161; K00134 GAPDH, gapA; glyceraldehyde 3-phosphate dehydrogenase (phosphorylating) [EC:1.2.1.12]
D DYST_03275; K01834 PGAM, gpmA; 2,3-bisphosphoglycerate-dependent phosphoglycerate mutase [EC:5.4.2.11]
D DYST_02158; K00873 PK, pyk; pyruvate kinase [EC:2.7.1.40]
D DYST_04575; K04079 HSP90A, htpG; molecular chaperone HtpG
D DYST_02555; K20523 SH3YL1; SH3 domain-containing YSC84-like protein 1
C 04121 Ubiquitin system [BR:ko04121]
D DYST_02252; K08770 UBC; ubiquitin C
D DYST_01271; K11996 MOCS3, UBA4; adenylyltransferase and sulfurtransferase [EC:2.7.7.80 2.8.1.11]
D DYST_00595; K03350 APC3, CDC27; anaphase-promoting complex subunit 3
C 03051 Proteasome [BR:ko03051]
D DYST_04575; K04079 HSP90A, htpG; molecular chaperone HtpG
C 03032 DNA replication proteins [BR:ko03032]
D DYST_00895; K03469 rnhA, RNASEH1; ribonuclease HI [EC:3.1.26.4]
D DYST_00210; K00558 DNMT1, dcm; DNA (cytosine-5)-methyltransferase 1 [EC:2.1.1.37]
D DYST_01302; K00558 DNMT1, dcm; DNA (cytosine-5)-methyltransferase 1 [EC:2.1.1.37]
D DYST_01926; K04764 ihfA, himA; integration host factor subunit alpha
D DYST_00116; K05788 ihfB, himD; integration host factor subunit beta
D DYST_03091; K02313 dnaA; chromosomal replication initiator protein
D DYST_01711; K02314 dnaB; replicative DNA helicase [EC:3.6.4.12]
D DYST_03477; K02316 dnaG; DNA primase [EC:2.7.7.101]
D DYST_03930; K03111 ssb; single-strand DNA-binding protein
D DYST_04472; K02337 dnaE; DNA polymerase III subunit alpha [EC:2.7.7.7]
D DYST_03090; K02338 dnaN; DNA polymerase III subunit beta [EC:2.7.7.7]
D DYST_02061; K02339 holC; DNA polymerase III subunit chi [EC:2.7.7.7]
D DYST_01766; K02340 holA; DNA polymerase III subunit delta [EC:2.7.7.7]
D DYST_04903; K02341 holB; DNA polymerase III subunit delta' [EC:2.7.7.7]
D DYST_00894; K02342 dnaQ; DNA polymerase III subunit epsilon [EC:2.7.7.7]
D DYST_04880; K02343 dnaX; DNA polymerase III subunit gamma/tau [EC:2.7.7.7]
D DYST_04476; K03470 rnhB; ribonuclease HII [EC:3.1.26.4]
D DYST_02490; K02335 polA; DNA polymerase I [EC:2.7.7.7]
D DYST_00402; K01972 E6.5.1.2, ligA, ligB; DNA ligase (NAD+) [EC:6.5.1.2]
D DYST_03527; K06223 dam; DNA adenine methylase [EC:2.1.1.72]
D DYST_04145; K10763 hda; DnaA-homolog protein
D DYST_00013; K02469 gyrA; DNA gyrase subunit A [EC:5.6.2.2]
D DYST_03088; K02470 gyrB; DNA gyrase subunit B [EC:5.6.2.2]
D DYST_04514; K02621 parC; topoisomerase IV subunit A [EC:5.6.2.2]
D DYST_01041; K02622 parE; topoisomerase IV subunit B [EC:5.6.2.2]
D DYST_03219; K03168 topA; DNA topoisomerase I [EC:5.6.2.1]
C 03036 Chromosome and associated proteins [BR:ko03036]
D DYST_04389; K09667 OGT; protein O-GlcNAc transferase [EC:2.4.1.255]
D DYST_04070; K11422 SETD1, SET1; [histone H3]-lysine4 N-trimethyltransferase SETD1 [EC:2.1.1.354]
D DYST_00210; K00558 DNMT1, dcm; DNA (cytosine-5)-methyltransferase 1 [EC:2.1.1.37]
D DYST_01302; K00558 DNMT1, dcm; DNA (cytosine-5)-methyltransferase 1 [EC:2.1.1.37]
D DYST_00867; K03685 rnc, DROSHA, RNT1; ribonuclease III [EC:3.1.26.3]
D DYST_04703; K08796 BRSK; BR serine/threonine kinase [EC:2.7.11.1]
D DYST_02156; K01623 ALDO; fructose-bisphosphate aldolase, class I [EC:4.1.2.13]
D DYST_00595; K03350 APC3, CDC27; anaphase-promoting complex subunit 3
D DYST_01926; K04764 ihfA, himA; integration host factor subunit alpha
D DYST_00116; K05788 ihfB, himD; integration host factor subunit beta
D DYST_00018; K05516 cbpA; curved DNA-binding protein
D DYST_03091; K02313 dnaA; chromosomal replication initiator protein
D DYST_04102; K04047 dps; starvation-inducible DNA-binding protein
D DYST_02481; K03557 fis; Fis family transcriptional regulator, factor for inversion stimulation protein
D DYST_01311; K03666 hfq; host factor-I protein
D DYST_03989; K05596 iciA; LysR family transcriptional regulator, chromosome initiation inhibitor
D DYST_02828; K03719 lrp; Lrp/AsnC family transcriptional regulator, leucine-responsive regulatory protein
D DYST_00387; K03529 smc; chromosome segregation protein
D DYST_00256; K05896 scpA; segregation and condensation protein A
D DYST_00255; K06024 scpB; segregation and condensation protein B
D DYST_03899; K03590 ftsA; cell division protein FtsA
D DYST_01030; K05589 ftsB; cell division protein FtsB
D DYST_02306; K09812 ftsE; cell division transport system ATP-binding protein
D DYST_03890; K03587 ftsI; cell division protein FtsI (penicillin-binding protein 3) [EC:3.4.16.4]
D DYST_00811; K03466 ftsK, spoIIIE; DNA segregation ATPase FtsK/SpoIIIE, S-DNA-T family
D DYST_03097; K03466 ftsK, spoIIIE; DNA segregation ATPase FtsK/SpoIIIE, S-DNA-T family
D DYST_03898; K03589 ftsQ; cell division protein FtsQ
D DYST_03894; K03588 ftsW, spoVE; cell division protein FtsW
D DYST_02305; K09811 ftsX; cell division transport system permease protein
D DYST_03900; K03531 ftsZ; cell division protein FtsZ
D DYST_00388; K03528 zipA; cell division protein ZipA
D DYST_03695; K09888 zapA; cell division protein ZapA
D DYST_03351; K06916 zapE; cell division protein ZapE
D DYST_04626; K01448 amiABC; N-acetylmuramoyl-L-alanine amidase [EC:3.5.1.28]
D DYST_01127; K03585 acrA, mexA, adeI, smeD, mtrC, cmeA; membrane fusion protein, multidrug efflux system
D DYST_01470; K03585 acrA, mexA, adeI, smeD, mtrC, cmeA; membrane fusion protein, multidrug efflux system
D DYST_04754; K03610 minC; septum site-determining protein MinC
D DYST_04753; K03609 minD; septum site-determining protein MinD
D DYST_04752; K03608 minE; cell division topological specificity factor
D DYST_02391; K03569 mreB; rod shape-determining protein MreB and related proteins
D DYST_02390; K03570 mreC; rod shape-determining protein MreC
D DYST_02389; K03571 mreD; rod shape-determining protein MreD
D DYST_02387; K05837 rodA, mrdB; rod shape determining protein RodA
D DYST_00193; K03496 parA, soj; chromosome partitioning protein
D DYST_03132; K03496 parA, soj; chromosome partitioning protein
D DYST_00201; K03497 parB, spo0J; ParB family transcriptional regulator, chromosome partitioning protein
D DYST_03133; K03497 parB, spo0J; ParB family transcriptional regulator, chromosome partitioning protein
D DYST_04514; K02621 parC; topoisomerase IV subunit A [EC:5.6.2.2]
D DYST_01041; K02622 parE; topoisomerase IV subunit B [EC:5.6.2.2]
D DYST_02945; K03495 gidA, mnmG, MTO1; tRNA uridine 5-carboxymethylaminomethyl modification enzyme
D DYST_03131; K03501 gidB, rsmG; 16S rRNA (guanine527-N7)-methyltransferase [EC:2.1.1.170]
D DYST_03108; K03733 xerC; integrase/recombinase XerC
D DYST_04816; K03733 xerC; integrase/recombinase XerC
D DYST_04825; K03733 xerC; integrase/recombinase XerC
D DYST_00587; K04763 xerD; integrase/recombinase XerD
D DYST_04180; K04763 xerD; integrase/recombinase XerD
D DYST_01232; K03593 mrp, NUBPL; ATP-binding protein involved in chromosome partitioning
D DYST_03501; K03978 engB; GTP-binding protein
C 03400 DNA repair and recombination proteins [BR:ko03400]
D DYST_01167; K00567 ogt, MGMT; methylated-DNA-[protein]-cysteine S-methyltransferase [EC:2.1.1.63]
D DYST_00397; K01669 phrB; deoxyribodipyrimidine photo-lyase [EC:4.1.99.3]
D DYST_02303; K03648 UNG, UDG; uracil-DNA glycosylase [EC:3.2.2.27]
D DYST_03940; K03652 MPG; DNA-3-methyladenine glycosylase [EC:3.2.2.21]
D DYST_04166; K03575 mutY; A/G-specific adenine glycosylase [EC:3.2.2.31]
D DYST_01241; K10773 NTH; endonuclease III [EC:4.2.99.18]
D DYST_02159; K05986 NUCS; nuclease S1 [EC:3.1.30.1]
D DYST_01996; K03574 mutT, NUDT15, MTH2; 8-oxo-dGTP diphosphatase [EC:3.6.1.55]
D DYST_04502; K03574 mutT, NUDT15, MTH2; 8-oxo-dGTP diphosphatase [EC:3.6.1.55]
D DYST_02975; K01520 dut, DUT; dUTP pyrophosphatase [EC:3.6.1.23]
D DYST_03812; K10778 ada; AraC family transcriptional regulator, regulatory protein of adaptative response / methylated-DNA-[protein]-cysteine methyltransferase [EC:2.1.1.63]
D DYST_02559; K13530 adaA; AraC family transcriptional regulator, regulatory protein of adaptative response / methylphosphotriester-DNA alkyltransferase methyltransferase [EC:2.1.1.-]
D DYST_00994; K03649 mug; double-stranded uracil-DNA glycosylase [EC:3.2.2.28]
D DYST_01166; K13529 ada-alkA; AraC family transcriptional regulator, regulatory protein of adaptative response / DNA-3-methyladenine glycosylase II [EC:3.2.2.21]
D DYST_02936; K01246 tag; DNA-3-methyladenine glycosylase I [EC:3.2.2.20]
D DYST_02810; K10563 mutM, fpg; formamidopyrimidine-DNA glycosylase [EC:3.2.2.23 4.2.99.18]
D DYST_02970; K01142 E3.1.11.2, xthA; exodeoxyribonuclease III [EC:3.1.11.2]
D DYST_03127; K01142 E3.1.11.2, xthA; exodeoxyribonuclease III [EC:3.1.11.2]
D DYST_01149; K05982 E3.1.21.7, nfi; deoxyribonuclease V [EC:3.1.21.7]
D DYST_00231; K07462 recJ; single-stranded-DNA-specific exonuclease [EC:3.1.-.-]
D DYST_00402; K01972 E6.5.1.2, ligA, ligB; DNA ligase (NAD+) [EC:6.5.1.2]
D DYST_02490; K02335 polA; DNA polymerase I [EC:2.7.7.7]
D DYST_04636; K03701 uvrA; excinuclease ABC subunit A
D DYST_01936; K03702 uvrB; excinuclease ABC subunit B
D DYST_00427; K03703 uvrC; excinuclease ABC subunit C
D DYST_02502; K03657 uvrD, pcrA; DNA helicase II / ATP-dependent DNA helicase PcrA [EC:3.6.4.12]
D DYST_04413; K03043 rpoB; DNA-directed RNA polymerase subunit beta [EC:2.7.7.6]
D DYST_04414; K03046 rpoC; DNA-directed RNA polymerase subunit beta' [EC:2.7.7.6]
D DYST_04444; K03040 rpoA; DNA-directed RNA polymerase subunit alpha [EC:2.7.7.6]
D DYST_03778; K03060 rpoZ; DNA-directed RNA polymerase subunit omega [EC:2.7.7.6]
D DYST_01439; K03723 mfd; transcription-repair coupling factor (superfamily II helicase) [EC:3.6.4.-]
D DYST_04581; K03555 mutS; DNA mismatch repair protein MutS
D DYST_04627; K03572 mutL; DNA mismatch repair protein MutL
D DYST_00268; K01141 sbcB, exoI; exodeoxyribonuclease I [EC:3.1.11.1]
D DYST_00827; K03601 xseA; exodeoxyribonuclease VII large subunit [EC:3.1.11.6]
D DYST_04468; K03602 xseB; exodeoxyribonuclease VII small subunit [EC:3.1.11.6]
D DYST_04472; K02337 dnaE; DNA polymerase III subunit alpha [EC:2.7.7.7]
D DYST_03090; K02338 dnaN; DNA polymerase III subunit beta [EC:2.7.7.7]
D DYST_02061; K02339 holC; DNA polymerase III subunit chi [EC:2.7.7.7]
D DYST_01766; K02340 holA; DNA polymerase III subunit delta [EC:2.7.7.7]
D DYST_04903; K02341 holB; DNA polymerase III subunit delta' [EC:2.7.7.7]
D DYST_00894; K02342 dnaQ; DNA polymerase III subunit epsilon [EC:2.7.7.7]
D DYST_04880; K02343 dnaX; DNA polymerase III subunit gamma/tau [EC:2.7.7.7]
D DYST_03930; K03111 ssb; single-strand DNA-binding protein
D DYST_03527; K06223 dam; DNA adenine methylase [EC:2.1.1.72]
D DYST_00204; K07458 vsr; DNA mismatch endonuclease, patch repair protein [EC:3.1.-.-]
D DYST_04687; K03582 recB; exodeoxyribonuclease V beta subunit [EC:3.1.11.5]
D DYST_04688; K03583 recC; exodeoxyribonuclease V gamma subunit [EC:3.1.11.5]
D DYST_04686; K03581 recD; exodeoxyribonuclease V alpha subunit [EC:3.1.11.5]
D DYST_04585; K03553 recA; recombination protein RecA
D DYST_04022; K03550 ruvA; holliday junction DNA helicase RuvA [EC:3.6.4.12]
D DYST_04024; K03551 ruvB; holliday junction DNA helicase RuvB [EC:3.6.4.12]
D DYST_04021; K01159 ruvC; crossover junction endodeoxyribonuclease RuvC [EC:3.1.21.10]
D DYST_02294; K04066 priA; primosomal protein N' (replication factor Y) (superfamily II helicase) [EC:3.6.4.-]
D DYST_01707; K04485 radA, sms; DNA repair protein RadA/Sms
D DYST_03089; K03629 recF; DNA replication and repair protein RecF
D DYST_03782; K03655 recG; ATP-dependent DNA helicase RecG [EC:3.6.4.12]
D DYST_00865; K03584 recO; DNA repair protein RecO (recombination protein O)
D DYST_04882; K06187 recR; recombination protein RecR
D DYST_00097; K03631 recN; DNA repair protein RecN (Recombination protein N)
D DYST_03307; K03554 rdgC; recombination associated protein RdgC
D DYST_01221; K06915 herA; DNA double-strand break repair helicase HerA and related ATPase
D DYST_00243; K01971 ligD; bifunctional non-homologous end joining protein LigD [EC:6.5.1.1]
D DYST_00013; K02469 gyrA; DNA gyrase subunit A [EC:5.6.2.2]
D DYST_03088; K02470 gyrB; DNA gyrase subunit B [EC:5.6.2.2]
D DYST_03219; K03168 topA; DNA topoisomerase I [EC:5.6.2.1]
D DYST_02481; K03557 fis; Fis family transcriptional regulator, factor for inversion stimulation protein
D DYST_01926; K04764 ihfA, himA; integration host factor subunit alpha
D DYST_00116; K05788 ihfB, himD; integration host factor subunit beta
D DYST_04153; K03654 recQ; ATP-dependent DNA helicase RecQ [EC:3.6.4.12]
D DYST_00257; K02346 dinB; DNA polymerase IV [EC:2.7.7.7]
D DYST_03641; K02346 dinB; DNA polymerase IV [EC:2.7.7.7]
D DYST_00516; K01356 lexA; repressor LexA [EC:3.4.21.88]
D DYST_00518; K14161 imuB; protein ImuB
D DYST_00519; K14162 dnaE2; error-prone DNA polymerase [EC:2.7.7.7]
D DYST_04588; K03565 recX; regulatory protein
D DYST_02814; K03656 rep; ATP-dependent DNA helicase Rep [EC:3.6.4.12]
D DYST_02536; K03722 dinG; ATP-dependent DNA helicase DinG [EC:3.6.4.12]
D DYST_04113; K03722 dinG; ATP-dependent DNA helicase DinG [EC:3.6.4.12]
D DYST_02777; K03724 lhr; ATP-dependent helicase Lhr and Lhr-like helicase [EC:3.6.4.-]
D DYST_02371; K00525 E1.17.4.1A, nrdA, nrdE; ribonucleoside-diphosphate reductase alpha chain [EC:1.17.4.1]
D DYST_02596; K00525 E1.17.4.1A, nrdA, nrdE; ribonucleoside-diphosphate reductase alpha chain [EC:1.17.4.1]
D DYST_02598; K00526 E1.17.4.1B, nrdB, nrdF; ribonucleoside-diphosphate reductase beta chain [EC:1.17.4.1]
C 03029 Mitochondrial biogenesis [BR:ko03029]
D DYST_01962; K00412 CYTB, petB; ubiquinol-cytochrome c reductase cytochrome b subunit
D DYST_00002; K02519 infB, MTIF2; translation initiation factor IF-2
D DYST_01931; K02520 infC, MTIF3; translation initiation factor IF-3
D DYST_04488; K02357 tsf, TSFM; elongation factor Ts
D DYST_04405; K02358 tuf, TUFM; elongation factor Tu
D DYST_04418; K02358 tuf, TUFM; elongation factor Tu
D DYST_04072; K02355 fusA, GFM, EFG; elongation factor G
D DYST_04417; K02355 fusA, GFM, EFG; elongation factor G
D DYST_01660; K08683 HSD17B10; 3-hydroxyacyl-CoA dehydrogenase / 3-hydroxy-2-methylbutyryl-CoA dehydrogenase [EC:1.1.1.35 1.1.1.178]
D DYST_04893; K02911 RP-L32, MRPL32, rpmF; large subunit ribosomal protein L32
D DYST_01714; K02990 RP-S6, MRPS6, rpsF; small subunit ribosomal protein S6
D DYST_00866; K03595 era, ERAL1; GTPase
D DYST_02965; K01866 YARS, tyrS; tyrosyl-tRNA synthetase [EC:6.1.1.1]
D DYST_01768; K01869 LARS, leuS; leucyl-tRNA synthetase [EC:6.1.1.4]
D DYST_04018; K01876 DARS2, aspS; aspartyl-tRNA synthetase [EC:6.1.1.12]
D DYST_02981; K01887 RARS, argS; arginyl-tRNA synthetase [EC:6.1.1.19]
D DYST_02116; K02433 gatA, QRSL1; aspartyl-tRNA(Asn)/glutamyl-tRNA(Gln) amidotransferase subunit A [EC:6.3.5.6 6.3.5.7]
D DYST_00786; K01173 ENDOG; endonuclease G, mitochondrial
D DYST_03930; K03111 ssb; single-strand DNA-binding protein
D DYST_04481; K07277 SAM50, TOB55, bamA; outer membrane protein insertion porin family
D DYST_00100; K04043 dnaK, HSPA9; molecular chaperone DnaK
D DYST_00099; K03687 GRPE; molecular chaperone GrpE
D DYST_02457; K04077 groEL, HSPD1; chaperonin GroEL
D DYST_02458; K04078 groES, HSPE1; chaperonin GroES
D DYST_00101; K03686 dnaJ; molecular chaperone DnaJ
D DYST_01950; K07390 grxD, GLRX5; monothiol glutaredoxin
D DYST_03525; K07390 grxD, GLRX5; monothiol glutaredoxin
D DYST_00386; K22066 BOLA1; BolA-like protein 1
D DYST_01232; K03593 mrp, NUBPL; ATP-binding protein involved in chromosome partitioning
D DYST_03468; K02257 COX10, ctaB, cyoE; heme o synthase [EC:2.5.1.141]
D DYST_03467; K02259 COX15, ctaA; heme a synthase [EC:1.17.99.9]
D DYST_03094; K03217 yidC, spoIIIJ, OXA1, ccfA; YidC/Oxa1 family membrane protein insertase
D DYST_03185; K14998 SURF1, SHY1; surfeit locus 1 family protein
D DYST_03465; K14998 SURF1, SHY1; surfeit locus 1 family protein
D DYST_04764; K07152 SCO1; protein SCO1
D DYST_01796; K09650 PARL, PSARL, PCP1; rhomboid-like protein [EC:3.4.21.105]
D DYST_04575; K04079 HSP90A, htpG; molecular chaperone HtpG
B
B 09183 Protein families: signaling and cellular processes
C 02000 Transporters [BR:ko02000]
D DYST_04870; K11085 msbA; ATP-binding cassette, subfamily B, bacterial MsbA [EC:7.5.2.6]
D DYST_02057; K24819 ndvA; ATP-binding cassette, subfamily B, beta-glucan exporter [EC:7.5.2.3]
D DYST_02212; K13409 cvaB, mchF, raxB; ATP-binding cassette, subfamily B, bacterial CvaB/MchF/RaxB
D DYST_01146; K18893 vcaM; ATP-binding cassette, subfamily B, multidrug efflux pump
D DYST_00850; K06147 ABCB-BAC; ATP-binding cassette, subfamily B, bacterial
D DYST_00658; K02471 bacA, bclA; vitamin B12/bleomycin/antimicrobial peptide transport system ATP-binding/permease protein
D DYST_03848; K15738 uup; ABC transport system ATP-binding/permease protein
D DYST_01057; K23163 sbp; sulfate/thiosulfate transport system substrate-binding protein
D DYST_01056; K02046 cysU; sulfate/thiosulfate transport system permease protein
D DYST_01055; K02047 cysW; sulfate/thiosulfate transport system permease protein
D DYST_01054; K02045 cysA; sulfate/thiosulfate transport system ATP-binding protein [EC:7.3.2.3]
D DYST_01279; K02020 modA; molybdate transport system substrate-binding protein
D DYST_01278; K02018 modB; molybdate transport system permease protein
D DYST_01277; K02017 modC; molybdate transport system ATP-binding protein [EC:7.3.2.5]
D DYST_02878; K10112 msmX, msmK, malK, sugC, ggtA, msiK; multiple sugar transport system ATP-binding protein [EC:7.5.2.-]
D DYST_02113; K02067 mlaD, linM; phospholipid/cholesterol/gamma-HCH transport system substrate-binding protein
D DYST_03773; K02067 mlaD, linM; phospholipid/cholesterol/gamma-HCH transport system substrate-binding protein
D DYST_02111; K02066 mlaE, linK; phospholipid/cholesterol/gamma-HCH transport system permease protein
D DYST_03772; K02066 mlaE, linK; phospholipid/cholesterol/gamma-HCH transport system permease protein
D DYST_02112; K02065 mlaF, linL, mkl; phospholipid/cholesterol/gamma-HCH transport system ATP-binding protein
D DYST_03771; K02065 mlaF, linL, mkl; phospholipid/cholesterol/gamma-HCH transport system ATP-binding protein
D DYST_02114; K18480 linN; cholesterol transport system auxiliary component
D DYST_03775; K07323 mlaC; phospholipid transport system substrate-binding protein
D DYST_02881; K02027 ABC.MS.S; multiple sugar transport system substrate-binding protein
D DYST_02880; K02025 ABC.MS.P; multiple sugar transport system permease protein
D DYST_02879; K02026 ABC.MS.P1; multiple sugar transport system permease protein
D DYST_01255; K02040 pstS; phosphate transport system substrate-binding protein
D DYST_02373; K02040 pstS; phosphate transport system substrate-binding protein
D DYST_01256; K02037 pstC; phosphate transport system permease protein
D DYST_01257; K02038 pstA; phosphate transport system permease protein
D DYST_01258; K02036 pstB; phosphate transport system ATP-binding protein [EC:7.3.2.1]
D DYST_01225; K02044 phnD; phosphonate transport system substrate-binding protein
D DYST_04037; K02044 phnD; phosphonate transport system substrate-binding protein
D DYST_04552; K02073 metQ; D-methionine transport system substrate-binding protein
D DYST_04553; K02072 metI; D-methionine transport system permease protein
D DYST_04554; K02071 metN; D-methionine transport system ATP-binding protein
D DYST_03519; K25132 hmuT, phuT, bhuT, hemT; heme transport system substrate-binding protein
D DYST_03520; K25133 hmuU, phuU, bhuU, hemU; heme transport system permease protein
D DYST_03521; K10834 hmuV, phuV, bhuV, hemV; heme transport system ATP-binding protein [EC:7.6.2.5]
D DYST_02287; K02013 ABC.FEV.A; iron complex transport system ATP-binding protein [EC:7.2.2.-]
D DYST_04280; K06858 btuF; vitamin B12 transport system substrate-binding protein
D DYST_02131; K09690 wzm, rfbA; lipopolysaccharide transport system permease protein
D DYST_02132; K09691 wzt, rbfB; lipopolysaccharide transport system ATP-binding protein
D DYST_02059; K07091 lptF; lipopolysaccharide export system permease protein
D DYST_02058; K11720 lptG; lipopolysaccharide export system permease protein
D DYST_04133; K06861 lptB; lipopolysaccharide export system ATP-binding protein [EC:7.5.2.5]
D DYST_02562; K09696 natB; sodium transport system permease protein
D DYST_02563; K09697 natA; sodium transport system ATP-binding protein [EC:7.2.2.4]
D DYST_04760; K25151 gldF; gliding motility-associated transport system permease protein
D DYST_04759; K25152 gldA; gliding motility-associated transport system ATP-binding protein
D DYST_02807; K25153 gldG; gliding motility-associatede transport system auxiliary component
D DYST_04761; K25153 gldG; gliding motility-associatede transport system auxiliary component
D DYST_03014; K25180 ybhR; drug efflux transport system permease protein
D DYST_03015; K25181 ybhS; drug efflux transport system permease protein
D DYST_03016; K25182 ybhF; drug efflux transport system ATP-binding protein
D DYST_03019; K25183 ybhG; membrane fusion protein YbhG
D DYST_04865; K09808 lolC_E; lipoprotein-releasing system permease protein
D DYST_04866; K09810 lolD; lipoprotein-releasing system ATP-binding protein [EC:7.6.2.-]
D DYST_04249; K24948 yknZ, yvrN; antimicrobial peptide resistance transport system permease protein
D DYST_01822; K25169 devC; heterocyst specific transport system permease protein
D DYST_04841; K02195 ccmC; heme exporter protein C
D DYST_04842; K02194 ccmB; heme exporter protein B
D DYST_04843; K02193 ccmA; heme exporter protein A [EC:7.6.2.5]
D DYST_02305; K09811 ftsX; cell division transport system permease protein
D DYST_02306; K09812 ftsE; cell division transport system ATP-binding protein
D DYST_02805; K25158 ecsA; ABC-2 type transport system ATP-binding protein
D DYST_01911; K01992 ABC-2.P; ABC-2 type transport system permease protein
D DYST_02574; K01992 ABC-2.P; ABC-2 type transport system permease protein
D DYST_00043; K01990 ABC-2.A; ABC-2 type transport system ATP-binding protein
D DYST_01912; K01990 ABC-2.A; ABC-2 type transport system ATP-binding protein
D DYST_02573; K01990 ABC-2.A; ABC-2 type transport system ATP-binding protein
D DYST_02017; K02004 ABC.CD.P; putative ABC transport system permease protein
D DYST_03808; K02004 ABC.CD.P; putative ABC transport system permease protein
D DYST_04246; K02004 ABC.CD.P; putative ABC transport system permease protein
D DYST_04250; K02004 ABC.CD.P; putative ABC transport system permease protein
D DYST_04252; K02004 ABC.CD.P; putative ABC transport system permease protein
D DYST_04253; K02004 ABC.CD.P; putative ABC transport system permease protein
D DYST_01823; K02003 ABC.CD.A; putative ABC transport system ATP-binding protein
D DYST_02016; K02003 ABC.CD.A; putative ABC transport system ATP-binding protein
D DYST_03807; K02003 ABC.CD.A; putative ABC transport system ATP-binding protein
D DYST_04245; K02003 ABC.CD.A; putative ABC transport system ATP-binding protein
D DYST_01842; K09013 sufC; Fe-S cluster assembly ATP-binding protein
D DYST_03643; K13780 SLC7A5, LAT1; solute carrier family 7 (L-type amino acid transporter), member 5
D DYST_04082; K13780 SLC7A5, LAT1; solute carrier family 7 (L-type amino acid transporter), member 5
D DYST_02485; K14347 SLC10A7, P7; solute carrier family 10 (sodium/bile acid cotransporter), member 7
D DYST_02291; K03327 TC.MATE, SLC47A, norM, mdtK, dinF; multidrug resistance protein, MATE family
D DYST_03389; K08137 galP; MFS transporter, SP family, galactose:H+ symporter
D DYST_00573; K08138 xylE; MFS transporter, SP family, xylose:H+ symportor
D DYST_02576; K08139 HXT; MFS transporter, SP family, sugar:H+ symporter
D DYST_00361; K06609 iolT; MFS transporter, SP family, major inositol transporter
D DYST_02855; K02429 fucP; MFS transporter, FHS family, L-fucose permease
D DYST_03970; K02429 fucP; MFS transporter, FHS family, L-fucose permease
D DYST_03859; K11537 xapB; MFS transporter, NHS family, xanthosine permease
D DYST_02742; K03761 kgtP; MFS transporter, MHS family, alpha-ketoglutarate permease
D DYST_01733; K08178 JEN; MFS transporter, SHS family, lactate transporter
D DYST_00983; K07785 nrsD, nreB; MFS transporter, NRE family, putaive nickel resistance protein
D DYST_02969; K08218 ampG; MFS transporter, PAT family, beta-lactamase induction signal transducer AmpG
D DYST_02529; K08151 tetA; MFS transporter, DHA1 family, tetracycline resistance protein
D DYST_04520; K07552 bcr, tcaB; MFS transporter, DHA1 family, multidrug resistance protein
D DYST_02263; K19577 ydhP; MFS transporter, DHA1 family, inner membrane transport protein
D DYST_02657; K03446 emrB; MFS transporter, DHA2 family, multidrug resistance protein
D DYST_02789; K03446 emrB; MFS transporter, DHA2 family, multidrug resistance protein
D DYST_03152; K03446 emrB; MFS transporter, DHA2 family, multidrug resistance protein
D DYST_04848; K03446 emrB; MFS transporter, DHA2 family, multidrug resistance protein
D DYST_04793; K08223 fsr; MFS transporter, FSR family, fosmidomycin resistance protein
D DYST_01170; K08224 ynfM; MFS transporter, YNFM family, putative membrane transport protein
D DYST_04126; K08483 ptsI; phosphoenolpyruvate-protein phosphotransferase (PTS system enzyme I) [EC:2.7.3.9]
D DYST_04127; K02784 ptsH; phosphocarrier protein HPr
D DYST_04128; K02793 manXa; mannose PTS system EIIA component [EC:2.7.1.191]
D DYST_00405; K06188 aqpZ; aquaporin Z
D DYST_02406; K10716 kch, trkA, mthK, pch; voltage-gated potassium channel
D DYST_02274; K08715 IRPC; inward rectifier potassium channel
D DYST_01846; K03320 amt, AMT, MEP; ammonium transporter, Amt family
D DYST_00036; K00799 GST, gst; glutathione S-transferase [EC:2.5.1.18]
D DYST_01328; K00799 GST, gst; glutathione S-transferase [EC:2.5.1.18]
D DYST_01586; K00799 GST, gst; glutathione S-transferase [EC:2.5.1.18]
D DYST_01590; K00799 GST, gst; glutathione S-transferase [EC:2.5.1.18]
D DYST_01750; K00799 GST, gst; glutathione S-transferase [EC:2.5.1.18]
D DYST_02487; K00799 GST, gst; glutathione S-transferase [EC:2.5.1.18]
D DYST_02588; K00799 GST, gst; glutathione S-transferase [EC:2.5.1.18]
D DYST_02610; K00799 GST, gst; glutathione S-transferase [EC:2.5.1.18]
D DYST_02651; K00799 GST, gst; glutathione S-transferase [EC:2.5.1.18]
D DYST_02826; K00799 GST, gst; glutathione S-transferase [EC:2.5.1.18]
D DYST_03063; K00799 GST, gst; glutathione S-transferase [EC:2.5.1.18]
D DYST_03845; K00799 GST, gst; glutathione S-transferase [EC:2.5.1.18]
D DYST_01960; K03599 sspA, mglA; stringent starvation protein A
D DYST_03961; K07114 yfbK; Ca-activated chloride channel homolog
D DYST_03804; K03282 mscL; large conductance mechanosensitive channel
D DYST_01150; K05802 mscK, kefA, aefA; potassium-dependent mechanosensitive channel
D DYST_03633; K03442 mscS; small conductance mechanosensitive channel
D DYST_01490; K02556 motA; chemotaxis protein MotA
D DYST_04328; K02556 motA; chemotaxis protein MotA
D DYST_01491; K02557 motB; chemotaxis protein MotB
D DYST_01561; K02557 motB; chemotaxis protein MotB
D DYST_03374; K02557 motB; chemotaxis protein MotB
D DYST_04329; K02557 motB; chemotaxis protein MotB
D DYST_00145; K03561 exbB; biopolymer transport protein ExbB
D DYST_03085; K03561 exbB; biopolymer transport protein ExbB
D DYST_04868; K03561 exbB; biopolymer transport protein ExbB
D DYST_00146; K03559 exbD; biopolymer transport protein ExbD
D DYST_03084; K03559 exbD; biopolymer transport protein ExbD
D DYST_04869; K03559 exbD; biopolymer transport protein ExbD
D DYST_04026; K03562 tolQ; biopolymer transport protein TolQ
D DYST_03083; K03560 tolR; biopolymer transport protein TolR
D DYST_04027; K03560 tolR; biopolymer transport protein TolR
D DYST_01975; K03284 corA; magnesium transporter
D DYST_04518; K06199 crcB, FEX; fluoride exporter
D DYST_03154; K08994 yneE, BEST; ion channel-forming bestrophin family protein
D DYST_04148; K03699 tlyC; magnesium and cobalt exporter, CNNM family
D DYST_00395; K07221 oprO_P; phosphate-selective porin OprO and OprP
D DYST_00462; K07221 oprO_P; phosphate-selective porin OprO and OprP
D DYST_01322; K16191 K16191, arfA; peptidoglycan-binding protein ArfA
D DYST_00971; K03286 TC.OOP; OmpA-OmpF porin, OOP family
D DYST_01323; K03286 TC.OOP; OmpA-OmpF porin, OOP family
D DYST_03338; K03286 TC.OOP; OmpA-OmpF porin, OOP family
D DYST_03446; K06076 fadL; long-chain fatty acid transport protein
D DYST_02569; K07347 fimD, fimC, mrkC, htrE, cssD; outer membrane usher protein
D DYST_03171; K07347 fimD, fimC, mrkC, htrE, cssD; outer membrane usher protein
D DYST_04085; K07347 fimD, fimC, mrkC, htrE, cssD; outer membrane usher protein
D DYST_01129; K12685 ssp; subtilase-type serine protease [EC:3.4.21.-]
D DYST_02949; K12686 apeE, estA, lip-1; outer membrane lipase/esterase
D DYST_02618; K12687 flu; antigen 43
D DYST_01615; K12688 sphB1, nalP, ausP; autotransporter serine protease [EC:3.4.21.-]
D DYST_02533; K19611 fepA, pfeA, iroN, pirA; ferric enterobactin receptor
D DYST_04689; K19611 fepA, pfeA, iroN, pirA; ferric enterobactin receptor
D DYST_00916; K16090 fiu; catecholate siderophore receptor
D DYST_01784; K16090 fiu; catecholate siderophore receptor
D DYST_00551; K16091 fecA; Fe(3+) dicitrate transport protein
D DYST_04004; K16092 btuB; vitamin B12 transporter
D DYST_02067; K16088 TC.FEV.OM1, fhuE, fpvA, fptA; outer-membrane receptor for ferric coprogen and ferric-rhodotorulic acid
D DYST_03517; K16087 TC.FEV.OM3, tbpA, hemR, lbpA, hpuB, bhuR, hugA, hmbR; hemoglobin/transferrin/lactoferrin receptor protein
D DYST_00467; K02014 TC.FEV.OM; iron complex outermembrane recepter protein
D DYST_00751; K02014 TC.FEV.OM; iron complex outermembrane recepter protein
D DYST_00993; K02014 TC.FEV.OM; iron complex outermembrane recepter protein
D DYST_01123; K02014 TC.FEV.OM; iron complex outermembrane recepter protein
D DYST_01797; K02014 TC.FEV.OM; iron complex outermembrane recepter protein
D DYST_02779; K02014 TC.FEV.OM; iron complex outermembrane recepter protein
D DYST_03448; K02014 TC.FEV.OM; iron complex outermembrane recepter protein
D DYST_03951; K02014 TC.FEV.OM; iron complex outermembrane recepter protein
D DYST_02434; K12340 tolC, bepC, cyaE, raxC, sapF, rsaF, hasF; outer membrane protein
D DYST_03033; K18300 oprN; outer membrane protein, multidrug efflux system
D DYST_01125; K18139 oprM, emhC, ttgC, cusC, adeK, smeF, mtrE, cmeC, gesC; outer membrane protein, multidrug efflux system
D DYST_04850; K15550 mdtP; outer membrane protein, multidrug efflux system
D DYST_00951; K01991 wza, gfcE; polysaccharide biosynthesis/export protein
D DYST_01122; K07267 oprB; porin
D DYST_04481; K07277 SAM50, TOB55, bamA; outer membrane protein insertion porin family
D DYST_00447; K17713 bamB; outer membrane protein assembly factor BamB
D DYST_03995; K05807 bamD; outer membrane protein assembly factor BamD
D DYST_00093; K06186 bamE, smpA; outer membrane protein assembly factor BamE
D DYST_04100; K07278 tamA; translocation and assembly module TamA
D DYST_04099; K09800 tamB; translocation and assembly module TamB
D DYST_00972; K21449 ata, sadA, emaA; trimeric autotransporter adhesin
D DYST_00973; K21449 ata, sadA, emaA; trimeric autotransporter adhesin
D DYST_03910; K04744 lptD, imp, ostA; LPS-assembly protein
D DYST_00049; K20543 bcsC; cellulose synthase operon protein C
D DYST_01972; K06189 corC, tlyC; hemolysin (HlyC) family protein
D DYST_02492; K16211 malY, malT; maltose/moltooligosaccharide transporter
D DYST_00430; K11737 cycA; D-serine/D-alanine/glycine transporter
D DYST_02784; K03759 adiC; arginine:agmatine antiporter
D DYST_04806; K03759 adiC; arginine:agmatine antiporter
D DYST_01189; K16264 czcD, zitB; cobalt-zinc-cadmium efflux system protein
D DYST_03473; K15726 czcA, cusA, cnrA; heavy metal efflux system protein
D DYST_00139; K07787 cusA, silA; copper/silver efflux system protein
D DYST_03032; K18299 mexF; multidrug efflux pump
D DYST_00668; K18305 mexG; transmembrane protein
D DYST_01131; K18303 mexK; multidrug efflux pump
D DYST_01126; K18138 acrB, mexB, adeJ, smeE, mtrD, cmeB; multidrug efflux pump
D DYST_01461; K07788 mdtB; multidrug efflux pump
D DYST_03360; K07788 mdtB; multidrug efflux pump
D DYST_03648; K03297 emrE, qac, mmr, smr; small multidrug resistance pump
D DYST_01261; K11741 sugE; quaternary ammonium compound-resistance protein SugE
D DYST_02607; K11742 mdtI; spermidine export protein MdtI
D DYST_02608; K11743 mdtJ; spermidine export protein MdtJ
D DYST_02488; K08978 TC.BAT1; bacterial/archaeal transporter family protein
D DYST_00910; K11939 rhtA; inner membrane transporter RhtA
D DYST_00546; K09936 TC.BAT2; bacterial/archaeal transporter family-2 protein
D DYST_01494; K09771 TC.SMR3; small multidrug resistance family-3 protein
D DYST_01427; K07300 chaA, CAX; Ca2+:H+ antiporter
D DYST_04785; K07300 chaA, CAX; Ca2+:H+ antiporter
D DYST_03674; K11102 gltP, gltT; proton glutamate symport protein
D DYST_00293; K24160 NHA1, SOD2; sodium/hydrogen antiporter
D DYST_03442; K11747 kefB; glutathione-regulated potassium-efflux system protein KefB
D DYST_04691; K06901 pbuG, azgA, ghxP, ghxQ, adeQ; adenine/guanine/hypoxanthine permease
D DYST_00292; K03322 mntH; manganese transport protein
D DYST_03471; K03324 yjbB; phosphate:Na+ symporter
D DYST_02660; K03325 ACR3, arsB; arsenite transporter
D DYST_00644; K16693 wzxE; enterobacterial common antigen flippase
D DYST_04643; K03980 murJ, mviN; putative peptidoglycan lipid II flippase
D DYST_04576; K24180 mleP; malate permease and related proteins
D DYST_04023; K03549 kup; KUP system potassium uptake protein
D DYST_03990; K06895 lysE, argO; L-lysine exporter family protein LysE/ArgO
D DYST_03860; K05835 rhtC; threonine efflux protein
D DYST_04144; K03548 perM; putative permease
D DYST_04496; K22736 VIT; vacuolar iron transporter family protein
D DYST_03420; K05595 marC; multiple antibiotic resistance protein
D DYST_03894; K03588 ftsW, spoVE; cell division protein FtsW
D DYST_00520; K07243 FTR, FTH1, efeU; high-affinity iron transporter
D DYST_01120; K16301 efeB; deferrochelatase/peroxidase EfeB [EC:1.11.1.-]
D DYST_00147; K03832 tonB; periplasmic protein TonB
D DYST_02039; K03832 tonB; periplasmic protein TonB
D DYST_02105; K03832 tonB; periplasmic protein TonB
D DYST_02248; K03832 tonB; periplasmic protein TonB
D DYST_02319; K03640 pal; peptidoglycan-associated lipoprotein
D DYST_04030; K03640 pal; peptidoglycan-associated lipoprotein
D DYST_04029; K03641 tolB; TolB protein
D DYST_02423; K15987 hppA; K(+)-stimulated pyrophosphate-energized sodium pump [EC:7.1.3.2]
D DYST_03419; K06196 ccdA; cytochrome c-type biogenesis protein
D DYST_01384; K03543 emrA; membrane fusion protein, multidrug efflux system
D DYST_02656; K03543 emrA; membrane fusion protein, multidrug efflux system
D DYST_02790; K03543 emrA; membrane fusion protein, multidrug efflux system
D DYST_03151; K03543 emrA; membrane fusion protein, multidrug efflux system
D DYST_04849; K03543 emrA; membrane fusion protein, multidrug efflux system
D DYST_01195; K15727 czcB, cusB, cnrB; membrane fusion protein, heavy metal efflux system
D DYST_03472; K15727 czcB, cusB, cnrB; membrane fusion protein, heavy metal efflux system
D DYST_00138; K07798 cusB, silB; membrane fusion protein, copper/silver efflux system
D DYST_02213; K13408 cvaA, mchE, raxA; membrane fusion protein
D DYST_03031; K18298 mexE; membrane fusion protein, multidrug efflux system
D DYST_01132; K18302 mexJ; membrane fusion protein, multidrug efflux system
D DYST_01133; K18302 mexJ; membrane fusion protein, multidrug efflux system
D DYST_01127; K03585 acrA, mexA, adeI, smeD, mtrC, cmeA; membrane fusion protein, multidrug efflux system
D DYST_01470; K03585 acrA, mexA, adeI, smeD, mtrC, cmeA; membrane fusion protein, multidrug efflux system
D DYST_01460; K07799 mdtA; membrane fusion protein, multidrug efflux system
D DYST_03359; K07799 mdtA; membrane fusion protein, multidrug efflux system
D DYST_01641; K04759 feoB; ferrous iron transport protein B
D DYST_04838; K02198 ccmF; cytochrome c-type biogenesis protein CcmF
D DYST_01118; K07274 mipA, ompV; MipA family protein
C 02044 Secretion system [BR:ko02044]
D DYST_02434; K12340 tolC, bepC, cyaE, raxC, sapF, rsaF, hasF; outer membrane protein
D DYST_02213; K13408 cvaA, mchE, raxA; membrane fusion protein
D DYST_02212; K13409 cvaB, mchF, raxB; ATP-binding cassette, subfamily B, bacterial CvaB/MchF/RaxB
D DYST_00167; K02453 gspD; general secretion pathway protein D
D DYST_03387; K02453 gspD; general secretion pathway protein D
D DYST_00156; K02454 gspE; general secretion pathway protein E [EC:7.4.2.8]
D DYST_02955; K02454 gspE; general secretion pathway protein E [EC:7.4.2.8]
D DYST_03377; K02454 gspE; general secretion pathway protein E [EC:7.4.2.8]
D DYST_03378; K02455 gspF; general secretion pathway protein F
D DYST_00159; K02456 gspG; general secretion pathway protein G
D DYST_03379; K02456 gspG; general secretion pathway protein G
D DYST_00160; K02457 gspH; general secretion pathway protein H
D DYST_03380; K02457 gspH; general secretion pathway protein H
D DYST_01993; K02654 pilD, pppA; leader peptidase (prepilin peptidase) / N-methyltransferase [EC:3.4.23.43 2.1.1.-]
D DYST_01979; K02650 pilA; type IV pilus assembly protein PilA
D DYST_01991; K02652 pilB; type IV pilus assembly protein PilB
D DYST_01992; K02653 pilC; type IV pilus assembly protein PilC
D DYST_01786; K02655 pilE; type IV pilus assembly protein PilE
D DYST_04683; K02655 pilE; type IV pilus assembly protein PilE
D DYST_00443; K02656 pilF; type IV pilus assembly protein PilF
D DYST_02037; K02657 pilG; twitching motility two-component system response regulator PilG
D DYST_00019; K02658 pilH; twitching motility two-component system response regulator PilH
D DYST_02036; K02658 pilH; twitching motility two-component system response regulator PilH
D DYST_02035; K02659 pilI; twitching motility protein PilI
D DYST_02034; K02660 pilJ; twitching motility protein PilJ
D DYST_03788; K02662 pilM; type IV pilus assembly protein PilM
D DYST_03789; K02663 pilN; type IV pilus assembly protein PilN
D DYST_03790; K02664 pilO; type IV pilus assembly protein PilO
D DYST_03791; K02666 pilQ; type IV pilus assembly protein PilQ
D DYST_02048; K02669 pilT; twitching motility protein PilT
D DYST_02047; K02670 pilU; twitching motility protein PilU
D DYST_04682; K02674 pilY1; type IV pilus assembly protein PilY1
D DYST_04906; K02676 pilZ; type IV pilus assembly protein PilZ
D DYST_03331; K02279 cpaB, rcpC; pilus assembly protein CpaB
D DYST_03330; K02280 cpaC, rcpA; pilus assembly protein CpaC
D DYST_03329; K02282 cpaE, tadZ; pilus assembly protein CpaE
D DYST_03328; K02283 cpaF, tadA; pilus assembly protein CpaF [EC:7.4.2.8]
D DYST_03327; K12510 tadB; tight adherence protein B
D DYST_03326; K12511 tadC; tight adherence protein C
D DYST_02050; K02221 yggT; YggT family protein
D DYST_01804; K02237 comEA; competence protein ComEA
D DYST_04867; K02238 comEC; competence protein ComEC
D DYST_00599; K02400 flhA; flagellar biosynthesis protein FlhA
D DYST_04320; K02400 flhA; flagellar biosynthesis protein FlhA
D DYST_04319; K02401 flhB; flagellar biosynthesis protein FlhB
D DYST_00608; K02409 fliF; flagellar M-ring protein FliF
D DYST_04305; K02409 fliF; flagellar M-ring protein FliF
D DYST_04307; K02411 fliH; flagellar assembly protein FliH
D DYST_00611; K02412 fliI; flagellum-specific ATP synthase [EC:7.4.2.8]
D DYST_04308; K02412 fliI; flagellum-specific ATP synthase [EC:7.4.2.8]
D DYST_04314; K02417 fliN; flagellar motor switch protein FliN
D DYST_00619; K02419 fliP; flagellar biosynthesis protein FliP
D DYST_04316; K02419 fliP; flagellar biosynthesis protein FliP
D DYST_00596; K02420 fliQ; flagellar biosynthesis protein FliQ
D DYST_04317; K02420 fliQ; flagellar biosynthesis protein FliQ
D DYST_04318; K02421 fliR; flagellar biosynthesis protein FliR
D DYST_00598; K13820 fliR-flhB; flagellar biosynthesis protein FliR/FlhB
D DYST_03873; K03199 virB4, lvhB4; type IV secretion system protein VirB4 [EC:7.4.2.8]
D DYST_03881; K03203 virB8, lvhB8; type IV secretion system protein VirB8
D DYST_03880; K03204 virB9, lvhB9; type IV secretion system protein VirB9
D DYST_03879; K03195 virB10, lvhB10; type IV secretion system protein VirB10
D DYST_03878; K03196 virB11, lvhB11; type IV secretion system protein VirB11 [EC:7.4.2.8]
D DYST_00180; K03205 virD4, lvhD4; type IV secretion system protein VirD4 [EC:7.4.2.8]
D DYST_03865; K03205 virD4, lvhD4; type IV secretion system protein VirD4 [EC:7.4.2.8]
D DYST_04181; K03981 dsbC; thiol:disulfide interchange protein DsbC [EC:5.3.4.1]
D DYST_00178; K20527 trbB; type IV secretion system protein TrbB [EC:7.4.2.8]
D DYST_00177; K20528 trbC; type IV secretion system protein TrbC
D DYST_00176; K20529 trbD; type IV secretion system protein TrbD
D DYST_00175; K20530 trbE; type IV secretion system protein TrbE [EC:7.4.2.8]
D DYST_00171; K20531 trbF; type IV secretion system protein TrbF
D DYST_00170; K20532 trbG; type IV secretion system protein TrbG
D DYST_00169; K20533 trbI; type IV secretion system protein TrbI
D DYST_00174; K20266 trbJ; type IV secretion system protein TrbJ
D DYST_00172; K07344 trbL; type IV secretion system protein TrbL
D DYST_01129; K12685 ssp; subtilase-type serine protease [EC:3.4.21.-]
D DYST_02949; K12686 apeE, estA, lip-1; outer membrane lipase/esterase
D DYST_02618; K12687 flu; antigen 43
D DYST_01615; K12688 sphB1, nalP, ausP; autotransporter serine protease [EC:3.4.21.-]
D DYST_03337; K12690 hsf; adhesin Hsf
D DYST_00709; K11891 impL, vasK, icmF; type VI secretion system protein ImpL
D DYST_00710; K11892 impK, ompA, vasF, dotU; type VI secretion system protein ImpK
D DYST_00711; K11893 impJ, vasE; type VI secretion system protein ImpJ
D DYST_03603; K11893 impJ, vasE; type VI secretion system protein ImpJ
D DYST_00721; K11895 impH, vasB; type VI secretion system protein ImpH
D DYST_03599; K11895 impH, vasB; type VI secretion system protein ImpH
D DYST_00722; K11896 impG, vasA; type VI secretion system protein ImpG
D DYST_03598; K11896 impG, vasA; type VI secretion system protein ImpG
D DYST_00723; K11897 impF; type VI secretion system protein ImpF
D DYST_00726; K11900 impC; type VI secretion system protein ImpC
D DYST_03596; K11900 impC; type VI secretion system protein ImpC
D DYST_00727; K11901 impB; type VI secretion system protein ImpB
D DYST_03595; K11901 impB; type VI secretion system protein ImpB
D DYST_00701; K11902 impA; type VI secretion system protein ImpA
D DYST_00725; K11903 hcp; type VI secretion system secreted protein Hcp
D DYST_03606; K11903 hcp; type VI secretion system secreted protein Hcp
D DYST_00483; K11904 vgrG; type VI secretion system secreted protein VgrG
D DYST_00716; K11904 vgrG; type VI secretion system secreted protein VgrG
D DYST_03597; K11905 K11905; type VI secretion system protein
D DYST_03602; K11906 vasD, lip; type VI secretion system protein VasD
D DYST_00720; K11907 vasG, clpV; type VI secretion system protein VasG
D DYST_03594; K11907 vasG, clpV; type VI secretion system protein VasG
D DYST_03591; K11910 vasJ; type VI secretion system protein VasJ
D DYST_00708; K11890 impM; type VI secretion system protein ImpM
D DYST_00714; K11894 impI, vasC; type VI secretion system protein ImpI
D DYST_00724; K11898 impE; type VI secretion system protein ImpE
D DYST_00707; K11915 stp1, pppA; serine/threonine protein phosphatase Stp1 [EC:3.1.3.16]
D DYST_02053; K07345 fimA; major type 1 subunit fimbrin (pilin)
D DYST_04086; K07346 fimC; fimbrial chaperone protein
D DYST_02569; K07347 fimD, fimC, mrkC, htrE, cssD; outer membrane usher protein
D DYST_03171; K07347 fimD, fimC, mrkC, htrE, cssD; outer membrane usher protein
D DYST_04085; K07347 fimD, fimC, mrkC, htrE, cssD; outer membrane usher protein
D DYST_03904; K03070 secA; preprotein translocase subunit SecA [EC:7.4.2.8]
D DYST_02799; K03071 secB; preprotein translocase subunit SecB
D DYST_01856; K03072 secD; preprotein translocase subunit SecD
D DYST_01854; K03074 secF; preprotein translocase subunit SecF
D DYST_00275; K03075 secG; preprotein translocase subunit SecG
D DYST_04440; K03076 secY; preprotein translocase subunit SecY
D DYST_01702; K03106 SRP54, ffh; signal recognition particle subunit SRP54 [EC:3.6.5.4]
D DYST_04168; K03110 ftsY; fused signal recognition particle receptor
D DYST_01857; K03210 yajC; preprotein translocase subunit YajC
D DYST_03094; K03217 yidC, spoIIIJ, OXA1, ccfA; YidC/Oxa1 family membrane protein insertase
D DYST_02552; K03118 tatC; sec-independent protein translocase protein TatC
C 02042 Bacterial toxins [BR:ko02042]
D DYST_04148; K03699 tlyC; magnesium and cobalt exporter, CNNM family
D DYST_02244; K11068 hlyIII; hemolysin III
D DYST_03042; K01114 plc; phospholipase C [EC:3.1.4.3]
C 02022 Two-component system [BR:ko02022]
D DYST_04598; K07636 phoR; two-component system, OmpR family, phosphate regulon sensor histidine kinase PhoR [EC:2.7.13.3]
D DYST_04599; K07657 phoB; two-component system, OmpR family, phosphate regulon response regulator PhoB
D DYST_01498; K07658 phoB1, phoP; two-component system, OmpR family, alkaline phosphatase synthesis response regulator PhoP
D DYST_02195; K07637 phoQ; two-component system, OmpR family, sensor histidine kinase PhoQ [EC:2.7.13.3]
D DYST_02196; K07660 phoP; two-component system, OmpR family, response regulator PhoP
D DYST_01177; K07662 cpxR; two-component system, OmpR family, response regulator CpxR
D DYST_01814; K07771 basR; two-component system, OmpR family, response regulator BasR
D DYST_03524; K07771 basR; two-component system, OmpR family, response regulator BasR
D DYST_01194; K07644 cusS, copS, silS; two-component system, OmpR family, heavy metal sensor histidine kinase CusS [EC:2.7.13.3]
D DYST_00345; K07645 qseC; two-component system, OmpR family, sensor histidine kinase QseC [EC:2.7.13.3]
D DYST_01246; K07645 qseC; two-component system, OmpR family, sensor histidine kinase QseC [EC:2.7.13.3]
D DYST_01815; K07645 qseC; two-component system, OmpR family, sensor histidine kinase QseC [EC:2.7.13.3]
D DYST_02622; K07645 qseC; two-component system, OmpR family, sensor histidine kinase QseC [EC:2.7.13.3]
D DYST_03425; K07645 qseC; two-component system, OmpR family, sensor histidine kinase QseC [EC:2.7.13.3]
D DYST_00344; K07666 qseB; two-component system, OmpR family, response regulator QseB
D DYST_01245; K07666 qseB; two-component system, OmpR family, response regulator QseB
D DYST_02621; K07666 qseB; two-component system, OmpR family, response regulator QseB
D DYST_03424; K07666 qseB; two-component system, OmpR family, response regulator QseB
D DYST_03928; K07646 kdpD; two-component system, OmpR family, sensor histidine kinase KdpD [EC:2.7.13.3]
D DYST_03929; K07667 kdpE; two-component system, OmpR family, KDP operon response regulator KdpE
D DYST_03947; K07667 kdpE; two-component system, OmpR family, KDP operon response regulator KdpE
D DYST_02062; K07648 arcB; two-component system, OmpR family, aerobic respiration control sensor histidine kinase ArcB [EC:2.7.13.3]
D DYST_03523; K07649 tctE; two-component system, OmpR family, sensor histidine kinase TctE [EC:2.7.13.3]
D DYST_01499; K07654 mtrB; two-component system, OmpR family, sensor histidine kinase MtrB [EC:2.7.13.3]
D DYST_03657; K14980 chvG; two-component system, OmpR family, sensor histidine kinase ChvG [EC:2.7.13.3]
D DYST_03655; K14981 chvI; two-component system, OmpR family, response regulator ChvI
D DYST_01377; K18072 parS; two-component system, OmpR family, sensor kinase ParS [EC:2.7.13.3]
D DYST_01376; K18073 parR; two-component system, OmpR family, response regulator ParR
D DYST_01176; K02484 K02484; two-component system, OmpR family, sensor kinase [EC:2.7.13.3]
D DYST_01193; K02483 K02483; two-component system, OmpR family, response regulator
D DYST_01831; K02483 K02483; two-component system, OmpR family, response regulator
D DYST_02014; K02483 K02483; two-component system, OmpR family, response regulator
D DYST_02301; K02483 K02483; two-component system, OmpR family, response regulator
D DYST_02624; K02483 K02483; two-component system, OmpR family, response regulator
D DYST_00469; K07674 narQ; two-component system, NarL family, nitrate/nitrite sensor histidine kinase NarQ [EC:2.7.13.3]
D DYST_00095; K07675 uhpB; two-component system, NarL family, sensor histidine kinase UhpB [EC:2.7.13.3]
D DYST_00096; K07686 uhpA; two-component system, NarL family, uhpT operon response regulator UhpA
D DYST_02315; K07677 rcsC; two-component system, NarL family, capsular synthesis sensor histidine kinase RcsC [EC:2.7.13.3]
D DYST_00416; K07687 rcsB; two-component system, NarL family, captular synthesis response regulator RcsB
D DYST_00756; K07687 rcsB; two-component system, NarL family, captular synthesis response regulator RcsB
D DYST_02314; K07687 rcsB; two-component system, NarL family, captular synthesis response regulator RcsB
D DYST_00215; K07689 uvrY, gacA, varA; two-component system, NarL family, invasion response regulator UvrY
D DYST_00241; K07688 fimZ; two-component system, NarL family, response regulator, fimbrial Z protein, FimZ
D DYST_01909; K07778 desK; two-component system, NarL family, sensor histidine kinase DesK [EC:2.7.13.3]
D DYST_01908; K07693 desR; two-component system, NarL family, response regulator DesR
D DYST_00240; K11617 liaS; two-component system, NarL family, sensor histidine kinase LiaS [EC:2.7.13.3]
D DYST_00470; K11618 liaR; two-component system, NarL family, response regulator LiaR
D DYST_02769; K02480 K02480; two-component system, NarL family, sensor kinase [EC:2.7.13.3]
D DYST_02773; K02479 K02479; two-component system, NarL family, response regulator
D DYST_04757; K02479 K02479; two-component system, NarL family, response regulator
D DYST_03038; K07705 lytT, lytR; two-component system, LytTR family, response regulator LytT
D DYST_03144; K08082 algZ; two-component system, LytTR family, sensor histidine kinase AlgZ [EC:2.7.13.3]
D DYST_03143; K08083 algR; two-component system, LytTR family, response regulator AlgR
D DYST_02754; K02478 K02478; two-component system, LytTR family, sensor kinase [EC:2.7.13.3]
D DYST_03037; K02478 K02478; two-component system, LytTR family, sensor kinase [EC:2.7.13.3]
D DYST_02670; K02477 K02477; two-component system, LytTR family, response regulator
D DYST_02753; K02477 K02477; two-component system, LytTR family, response regulator
D DYST_03004; K07708 glnL, ntrB; two-component system, NtrC family, nitrogen regulation sensor histidine kinase GlnL [EC:2.7.13.3]
D DYST_03003; K07712 glnG, ntrC; two-component system, NtrC family, nitrogen regulation response regulator GlnG
D DYST_04258; K13598 ntrY; two-component system, NtrC family, nitrogen regulation sensor histidine kinase NtrY [EC:2.7.13.3]
D DYST_04256; K07714 atoC; two-component system, NtrC family, response regulator AtoC
D DYST_03984; K02668 pilS, pehS; two-component system, NtrC family, sensor histidine kinase PilS [EC:2.7.13.3]
D DYST_03976; K02667 pilR, pehR; two-component system, NtrC family, response regulator PilR
D DYST_04327; K03407 cheA; two-component system, chemotaxis family, sensor kinase CheA [EC:2.7.13.3]
D DYST_04339; K03407 cheA; two-component system, chemotaxis family, sensor kinase CheA [EC:2.7.13.3]
D DYST_04325; K03413 cheY; two-component system, chemotaxis family, chemotaxis protein CheY
D DYST_04338; K03413 cheY; two-component system, chemotaxis family, chemotaxis protein CheY
D DYST_04345; K03412 cheB; two-component system, chemotaxis family, protein-glutamate methylesterase/glutaminase [EC:3.1.1.61 3.5.1.44]
D DYST_04287; K03415 cheV; two-component system, chemotaxis family, chemotaxis protein CheV
D DYST_02033; K06596 chpA; chemosensory pili system protein ChpA (sensor histidine kinase/response regulator)
D DYST_02037; K02657 pilG; twitching motility two-component system response regulator PilG
D DYST_00019; K02658 pilH; twitching motility two-component system response regulator PilH
D DYST_02036; K02658 pilH; twitching motility two-component system response regulator PilH
D DYST_02032; K06597 chpB; chemosensory pili system protein ChpB (putative protein-glutamate methylesterase)
D DYST_01472; K11444 wspR; two-component system, chemotaxis family, response regulator WspR [EC:2.7.7.65]
D DYST_02311; K11444 wspR; two-component system, chemotaxis family, response regulator WspR [EC:2.7.7.65]
D DYST_03973; K11354 cph1; two-component system, chemotaxis family, sensor kinase Cph1 [EC:2.7.13.3]
D DYST_03343; K13587 cckA; two-component system, cell cycle sensor histidine kinase and response regulator CckA [EC:2.7.13.3]
D DYST_00781; K18444 rrp1; two-component system, glycerol uptake and utilization response regulator
D DYST_02086; K18444 rrp1; two-component system, glycerol uptake and utilization response regulator
D DYST_01652; K07718 yesM; two-component system, sensor histidine kinase YesM [EC:2.7.13.3]
D DYST_02009; K15011 regB, regS, actS; two-component system, sensor histidine kinase RegB [EC:2.7.13.3]
D DYST_02010; K15012 regA, regR, actR; two-component system, response regulator RegA
D DYST_00755; K20973 sagS; two-component system, sensor histidine kinase SagS [EC:2.7.13.3]
D DYST_03974; K02485 rssB, hnr; two-component system, response regulator
D DYST_01412; K11527 K11527; two-component system, sensor histidine kinase and response regulator [EC:2.7.13.3]
C 02035 Bacterial motility proteins [BR:ko02035]
D DYST_04327; K03407 cheA; two-component system, chemotaxis family, sensor kinase CheA [EC:2.7.13.3]
D DYST_04339; K03407 cheA; two-component system, chemotaxis family, sensor kinase CheA [EC:2.7.13.3]
D DYST_04330; K03408 cheW; purine-binding chemotaxis protein CheW
D DYST_04341; K03408 cheW; purine-binding chemotaxis protein CheW
D DYST_01443; K03411 cheD; chemotaxis protein CheD [EC:3.5.1.44]
D DYST_04344; K03411 cheD; chemotaxis protein CheD [EC:3.5.1.44]
D DYST_01444; K00575 cheR; chemotaxis protein methyltransferase CheR [EC:2.1.1.80]
D DYST_02084; K00575 cheR; chemotaxis protein methyltransferase CheR [EC:2.1.1.80]
D DYST_04343; K00575 cheR; chemotaxis protein methyltransferase CheR [EC:2.1.1.80]
D DYST_04345; K03412 cheB; two-component system, chemotaxis family, protein-glutamate methylesterase/glutaminase [EC:3.1.1.61 3.5.1.44]
D DYST_04325; K03413 cheY; two-component system, chemotaxis family, chemotaxis protein CheY
D DYST_04338; K03413 cheY; two-component system, chemotaxis family, chemotaxis protein CheY
D DYST_04326; K03414 cheZ; chemotaxis protein CheZ
D DYST_04287; K03415 cheV; two-component system, chemotaxis family, chemotaxis protein CheV
D DYST_01445; K03406 mcp; methyl-accepting chemotaxis protein
D DYST_04342; K03406 mcp; methyl-accepting chemotaxis protein
D DYST_04346; K03406 mcp; methyl-accepting chemotaxis protein
D DYST_04340; K05875 tar; methyl-accepting chemotaxis protein II, aspartate sensor receptor
D DYST_02321; K05877 tap; methyl-accepting chemotaxis protein IV, peptide sensor receptor
D DYST_04307; K02411 fliH; flagellar assembly protein FliH
D DYST_00611; K02412 fliI; flagellum-specific ATP synthase [EC:7.4.2.8]
D DYST_04308; K02412 fliI; flagellum-specific ATP synthase [EC:7.4.2.8]
D DYST_04309; K02413 fliJ; flagellar protein FliJ
D DYST_00619; K02419 fliP; flagellar biosynthesis protein FliP
D DYST_04316; K02419 fliP; flagellar biosynthesis protein FliP
D DYST_00596; K02420 fliQ; flagellar biosynthesis protein FliQ
D DYST_04317; K02420 fliQ; flagellar biosynthesis protein FliQ
D DYST_04318; K02421 fliR; flagellar biosynthesis protein FliR
D DYST_00598; K13820 fliR-flhB; flagellar biosynthesis protein FliR/FlhB
D DYST_00599; K02400 flhA; flagellar biosynthesis protein FlhA
D DYST_04320; K02400 flhA; flagellar biosynthesis protein FlhA
D DYST_04319; K02401 flhB; flagellar biosynthesis protein FlhB
D DYST_04306; K02410 fliG; flagellar motor switch protein FliG
D DYST_04313; K02416 fliM; flagellar motor switch protein FliM
D DYST_04314; K02417 fliN; flagellar motor switch protein FliN
D DYST_00608; K02409 fliF; flagellar M-ring protein FliF
D DYST_04305; K02409 fliF; flagellar M-ring protein FliF
D DYST_00604; K02394 flgI; flagellar P-ring protein FlgI
D DYST_04294; K02394 flgI; flagellar P-ring protein FlgI
D DYST_04285; K02386 flgA; flagellar basal body P-ring formation protein FlgA
D DYST_00603; K02393 flgH; flagellar L-ring protein FlgH
D DYST_04312; K02415 fliL; flagellar protein FliL
D DYST_04304; K02408 fliE; flagellar hook-basal body complex protein FliE
D DYST_04288; K02387 flgB; flagellar basal-body rod protein FlgB
D DYST_04289; K02388 flgC; flagellar basal-body rod protein FlgC
D DYST_00614; K02389 flgD; flagellar basal-body rod modification protein FlgD
D DYST_04290; K02389 flgD; flagellar basal-body rod modification protein FlgD
D DYST_04292; K02391 flgF; flagellar basal-body rod protein FlgF
D DYST_04293; K02392 flgG; flagellar basal-body rod protein FlgG
D DYST_04295; K02395 flgJ; peptidoglycan hydrolase FlgJ
D DYST_04291; K02390 flgE; flagellar hook protein FlgE
D DYST_04296; K02396 flgK; flagellar hook-associated protein 1
D DYST_04297; K02397 flgL; flagellar hook-associated protein 3 FlgL
D DYST_04298; K02406 fliC, hag; flagellin
D DYST_04299; K02407 fliD; flagellar hook-associated protein 2
D DYST_04300; K02422 fliS; flagellar secretion chaperone FliS
D DYST_04324; K02405 fliA, whiG; RNA polymerase sigma factor FliA
D DYST_01490; K02556 motA; chemotaxis protein MotA
D DYST_04328; K02556 motA; chemotaxis protein MotA
D DYST_01491; K02557 motB; chemotaxis protein MotB
D DYST_01561; K02557 motB; chemotaxis protein MotB
D DYST_03374; K02557 motB; chemotaxis protein MotB
D DYST_04329; K02557 motB; chemotaxis protein MotB
D DYST_04303; K10941 flrA, fleQ, flaK; sigma-54 dependent transcriptional regulator, flagellar regulatory protein
D DYST_04322; K02404 flhF; flagellar biosynthesis protein FlhF
D DYST_04323; K04562 flhG, fleN; flagellar biosynthesis protein FlhG
D DYST_02037; K02657 pilG; twitching motility two-component system response regulator PilG
D DYST_00019; K02658 pilH; twitching motility two-component system response regulator PilH
D DYST_02036; K02658 pilH; twitching motility two-component system response regulator PilH
D DYST_02035; K02659 pilI; twitching motility protein PilI
D DYST_02034; K02660 pilJ; twitching motility protein PilJ
D DYST_02033; K06596 chpA; chemosensory pili system protein ChpA (sensor histidine kinase/response regulator)
D DYST_03976; K02667 pilR, pehR; two-component system, NtrC family, response regulator PilR
D DYST_03984; K02668 pilS, pehS; two-component system, NtrC family, sensor histidine kinase PilS [EC:2.7.13.3]
D DYST_02048; K02669 pilT; twitching motility protein PilT
D DYST_02047; K02670 pilU; twitching motility protein PilU
D DYST_02032; K06597 chpB; chemosensory pili system protein ChpB (putative protein-glutamate methylesterase)
D DYST_02031; K06598 chpC; chemosensory pili system protein ChpC
D DYST_01979; K02650 pilA; type IV pilus assembly protein PilA
D DYST_01991; K02652 pilB; type IV pilus assembly protein PilB
D DYST_01992; K02653 pilC; type IV pilus assembly protein PilC
D DYST_01993; K02654 pilD, pppA; leader peptidase (prepilin peptidase) / N-methyltransferase [EC:3.4.23.43 2.1.1.-]
D DYST_00443; K02656 pilF; type IV pilus assembly protein PilF
D DYST_03791; K02666 pilQ; type IV pilus assembly protein PilQ
D DYST_03790; K02664 pilO; type IV pilus assembly protein PilO
D DYST_03789; K02663 pilN; type IV pilus assembly protein PilN
D DYST_03788; K02662 pilM; type IV pilus assembly protein PilM
D DYST_04906; K02676 pilZ; type IV pilus assembly protein PilZ
D DYST_04682; K02674 pilY1; type IV pilus assembly protein PilY1
D DYST_01786; K02655 pilE; type IV pilus assembly protein PilE
D DYST_04683; K02655 pilE; type IV pilus assembly protein PilE
D DYST_03331; K02279 cpaB, rcpC; pilus assembly protein CpaB
D DYST_03330; K02280 cpaC, rcpA; pilus assembly protein CpaC
D DYST_03329; K02282 cpaE, tadZ; pilus assembly protein CpaE
D DYST_03328; K02283 cpaF, tadA; pilus assembly protein CpaF [EC:7.4.2.8]
D DYST_02053; K07345 fimA; major type 1 subunit fimbrin (pilin)
D DYST_04086; K07346 fimC; fimbrial chaperone protein
D DYST_02569; K07347 fimD, fimC, mrkC, htrE, cssD; outer membrane usher protein
D DYST_03171; K07347 fimD, fimC, mrkC, htrE, cssD; outer membrane usher protein
D DYST_04085; K07347 fimD, fimC, mrkC, htrE, cssD; outer membrane usher protein
C 04812 Cytoskeleton proteins [BR:ko04812]
D DYST_03444; K10380 ANK; ankyrin
D DYST_02391; K03569 mreB; rod shape-determining protein MreB and related proteins
D DYST_03900; K03531 ftsZ; cell division protein FtsZ
D DYST_03899; K03590 ftsA; cell division protein FtsA
D DYST_04754; K03610 minC; septum site-determining protein MinC
D DYST_04753; K03609 minD; septum site-determining protein MinD
D DYST_04752; K03608 minE; cell division topological specificity factor
D DYST_00193; K03496 parA, soj; chromosome partitioning protein
D DYST_03132; K03496 parA, soj; chromosome partitioning protein
D DYST_00201; K03497 parB, spo0J; ParB family transcriptional regulator, chromosome partitioning protein
D DYST_03133; K03497 parB, spo0J; ParB family transcriptional regulator, chromosome partitioning protein
C 04147 Exosome [BR:ko04147]
D DYST_04575; K04079 HSP90A, htpG; molecular chaperone HtpG
D DYST_02156; K01623 ALDO; fructose-bisphosphate aldolase, class I [EC:4.1.2.13]
D DYST_01031; K01689 ENO, eno; enolase [EC:4.2.1.11]
D DYST_02161; K00134 GAPDH, gapA; glyceraldehyde 3-phosphate dehydrogenase (phosphorylating) [EC:1.2.1.12]
D DYST_02151; K00927 PGK, pgk; phosphoglycerate kinase [EC:2.7.2.3]
D DYST_02158; K00873 PK, pyk; pyruvate kinase [EC:2.7.1.40]
D DYST_04595; K03767 PPIA; peptidyl-prolyl cis-trans isomerase A (cyclophilin A) [EC:5.2.1.8]
D DYST_04583; K01273 DPEP; membrane dipeptidase [EC:3.4.13.19]
D DYST_00468; K03234 EEF2; elongation factor 2
D DYST_02457; K04077 groEL, HSPD1; chaperonin GroEL
D DYST_00100; K04043 dnaK, HSPA9; molecular chaperone DnaK
D DYST_00301; K01810 GPI, pgi; glucose-6-phosphate isomerase [EC:5.3.1.9]
D DYST_04621; K01810 GPI, pgi; glucose-6-phosphate isomerase [EC:5.3.1.9]
D DYST_03102; K01278 DPP4, CD26; dipeptidyl-peptidase 4 [EC:3.4.14.5]
D DYST_00452; K00088 IMPDH, guaB; IMP dehydrogenase [EC:1.1.1.205]
D DYST_04405; K02358 tuf, TUFM; elongation factor Tu
D DYST_04418; K02358 tuf, TUFM; elongation factor Tu
D DYST_02410; K02503 HINT1, hinT, hit; histidine triad (HIT) family protein
D DYST_04884; K02503 HINT1, hinT, hit; histidine triad (HIT) family protein
D DYST_02485; K14347 SLC10A7, P7; solute carrier family 10 (sodium/bile acid cotransporter), member 7
D DYST_00259; K01897 ACSL, fadD; long-chain acyl-CoA synthetase [EC:6.2.1.3]
D DYST_01081; K01897 ACSL, fadD; long-chain acyl-CoA synthetase [EC:6.2.1.3]
D DYST_01616; K00626 ACAT, atoB; acetyl-CoA C-acetyltransferase [EC:2.3.1.9]
D DYST_02999; K00626 ACAT, atoB; acetyl-CoA C-acetyltransferase [EC:2.3.1.9]
D DYST_03841; K01251 E3.3.1.1, ahcY; adenosylhomocysteinase [EC:3.3.1.1]
D DYST_02414; K00939 adk, AK; adenylate kinase [EC:2.7.4.3]
D DYST_04045; K00759 APRT, apt; adenine phosphoribosyltransferase [EC:2.4.2.7]
D DYST_01674; K01755 argH, ASL; argininosuccinate lyase [EC:4.3.2.1]
D DYST_01679; K01940 argG, ASS1; argininosuccinate synthase [EC:6.3.4.5]
D DYST_02137; K01758 CTH; cystathionine gamma-lyase [EC:4.4.1.1]
D DYST_01839; K01593 DDC, TDC; aromatic-L-amino-acid/L-tryptophan decarboxylase [EC:4.1.1.28 4.1.1.105]
D DYST_03067; K03841 FBP, fbp; fructose-1,6-bisphosphatase I [EC:3.1.3.11]
D DYST_00351; K01206 FUCA; alpha-L-fucosidase [EC:3.2.1.51]
D DYST_00677; K01206 FUCA; alpha-L-fucosidase [EC:3.2.1.51]
D DYST_02394; K00864 glpK, GK; glycerol kinase [EC:2.7.1.30]
D DYST_03025; K01915 glnA, GLUL; glutamine synthetase [EC:6.3.1.2]
D DYST_03435; K01698 hemB, ALAD; porphobilinogen synthase [EC:4.2.1.24]
D DYST_02170; K00457 HPD, hppD; 4-hydroxyphenylpyruvate dioxygenase [EC:1.13.11.27]
D DYST_00364; K01205 NAGLU; alpha-N-acetylglucosaminidase [EC:3.2.1.50]
D DYST_00220; K01724 PCBD, phhB; 4a-hydroxytetrahydrobiopterin dehydratase [EC:4.2.1.96]
D DYST_02727; K01077 E3.1.3.1, phoA, phoB; alkaline phosphatase [EC:3.1.3.1]
D DYST_01923; K00058 serA, PHGDH; D-3-phosphoglycerate dehydrogenase / 2-oxoglutarate reductase [EC:1.1.1.95 1.1.1.399]
D DYST_02483; K00602 purH; phosphoribosylaminoimidazolecarboxamide formyltransferase / IMP cyclohydrolase [EC:2.1.2.3 3.5.4.10]
D DYST_03434; K01279 TPP1, CLN2; tripeptidyl-peptidase I [EC:3.4.14.9]
D DYST_00022; K00382 DLD, lpd, pdhD; dihydrolipoamide dehydrogenase [EC:1.8.1.4]
D DYST_03635; K00382 DLD, lpd, pdhD; dihydrolipoamide dehydrogenase [EC:1.8.1.4]
D DYST_01092; K03522 fixB, etfA; electron transfer flavoprotein alpha subunit
D DYST_02120; K03522 fixB, etfA; electron transfer flavoprotein alpha subunit
D DYST_00298; K00036 G6PD, zwf; glucose-6-phosphate 1-dehydrogenase [EC:1.1.1.49 1.1.1.363]
D DYST_03176; K00036 G6PD, zwf; glucose-6-phosphate 1-dehydrogenase [EC:1.1.1.49 1.1.1.363]
D DYST_01660; K08683 HSD17B10; 3-hydroxyacyl-CoA dehydrogenase / 3-hydroxy-2-methylbutyryl-CoA dehydrogenase [EC:1.1.1.35 1.1.1.178]
D DYST_00274; K01803 TPI, tpiA; triosephosphate isomerase (TIM) [EC:5.3.1.1]
D DYST_03275; K01834 PGAM, gpmA; 2,3-bisphosphoglycerate-dependent phosphoglycerate mutase [EC:5.4.2.11]
C 02048 Prokaryotic defense system [BR:ko02048]
D DYST_03527; K06223 dam; DNA adenine methylase [EC:2.1.1.72]
D DYST_00210; K00558 DNMT1, dcm; DNA (cytosine-5)-methyltransferase 1 [EC:2.1.1.37]
D DYST_01302; K00558 DNMT1, dcm; DNA (cytosine-5)-methyltransferase 1 [EC:2.1.1.37]
D DYST_01301; K07451 mcrA; 5-methylcytosine-specific restriction enzyme A [EC:3.1.21.-]
D DYST_02208; K18843 hicB; antitoxin HicB
D DYST_03760; K18843 hicB; antitoxin HicB
D DYST_03900; K03531 ftsZ; cell division protein FtsZ
D DYST_02391; K03569 mreB; rod shape-determining protein MreB and related proteins
D DYST_04514; K02621 parC; topoisomerase IV subunit A [EC:5.6.2.2]
D DYST_01041; K02622 parE; topoisomerase IV subunit B [EC:5.6.2.2]
D DYST_01200; K01885 EARS, gltX; glutamyl-tRNA synthetase [EC:6.1.1.17]
C 04030 G protein-coupled receptors [BR:ko04030]
C 04050 Cytokine receptors [BR:ko04050]
C 04054 Pattern recognition receptors [BR:ko04054]
C 03310 Nuclear receptors [BR:ko03310]
C 04040 Ion channels [BR:ko04040]
D DYST_04239; K04883 KCNAB2; potassium voltage-gated channel Shaker-related subfamily A, beta member 2
C 04031 GTP-binding proteins [BR:ko04031]
C 04052 Cytokines and growth factors [BR:ko04052]
C 04515 Cell adhesion molecules [BR:ko04515]
C 04090 CD molecules [BR:ko04090]
D DYST_03102; K01278 DPP4, CD26; dipeptidyl-peptidase 4 [EC:3.4.14.5]
D DYST_01168; K01513 ENPP1_3, CD203; ectonucleotide pyrophosphatase/phosphodiesterase family member 1/3 [EC:3.1.4.1 3.6.1.9]
C 01504 Antimicrobial resistance genes [BR:ko01504]
D DYST_01886; K18698 blaTEM; beta-lactamase class A TEM [EC:3.5.2.6]
D DYST_02767; K00662 aacC; aminoglycoside 3-N-acetyltransferase [EC:2.3.1.81]
D DYST_02529; K08151 tetA; MFS transporter, DHA1 family, tetracycline resistance protein
D DYST_02602; K02172 blaR1; bla regulator protein blaR1
D DYST_02601; K02171 blaI; BlaI family transcriptional regulator, penicillinase repressor
D DYST_01162; K17836 penP; beta-lactamase class A [EC:3.5.2.6]
D DYST_01377; K18072 parS; two-component system, OmpR family, sensor kinase ParS [EC:2.7.13.3]
D DYST_01376; K18073 parR; two-component system, OmpR family, response regulator ParR
D DYST_01194; K07644 cusS, copS, silS; two-component system, OmpR family, heavy metal sensor histidine kinase CusS [EC:2.7.13.3]
D DYST_03665; K08641 vanX; zinc D-Ala-D-Ala dipeptidase [EC:3.4.13.22]
D DYST_04195; K14205 mprF, fmtC; phosphatidylglycerol lysyltransferase [EC:2.3.2.3]
D DYST_02195; K07637 phoQ; two-component system, OmpR family, sensor histidine kinase PhoQ [EC:2.7.13.3]
D DYST_02196; K07660 phoP; two-component system, OmpR family, response regulator PhoP
D DYST_01127; K03585 acrA, mexA, adeI, smeD, mtrC, cmeA; membrane fusion protein, multidrug efflux system
D DYST_01470; K03585 acrA, mexA, adeI, smeD, mtrC, cmeA; membrane fusion protein, multidrug efflux system
D DYST_01126; K18138 acrB, mexB, adeJ, smeE, mtrD, cmeB; multidrug efflux pump
D DYST_01125; K18139 oprM, emhC, ttgC, cusC, adeK, smeF, mtrE, cmeC, gesC; outer membrane protein, multidrug efflux system
D DYST_03031; K18298 mexE; membrane fusion protein, multidrug efflux system
D DYST_03032; K18299 mexF; multidrug efflux pump
D DYST_03033; K18300 oprN; outer membrane protein, multidrug efflux system
D DYST_02432; K18301 mexL; TetR/AcrR family transcriptional regulator, mexJK operon transcriptional repressor
D DYST_01132; K18302 mexJ; membrane fusion protein, multidrug efflux system
D DYST_01133; K18302 mexJ; membrane fusion protein, multidrug efflux system
D DYST_01131; K18303 mexK; multidrug efflux pump
D DYST_01113; K19591 cueR; MerR family transcriptional regulator, copper efflux regulator
D DYST_02434; K12340 tolC, bepC, cyaE, raxC, sapF, rsaF, hasF; outer membrane protein
D DYST_00732; K18900 bpeT; LysR family transcriptional regulator, regulator for bpeEF and oprC
C 00535 Proteoglycans [BR:ko00535]
C 00536 Glycosaminoglycan binding proteins [BR:ko00536]
D DYST_04670; K15125 fhaB; filamentous hemagglutinin
C 00537 Glycosylphosphatidylinositol (GPI)-anchored proteins [BR:ko00537]
D DYST_02727; K01077 E3.1.3.1, phoA, phoB; alkaline phosphatase [EC:3.1.3.1]
D DYST_01168; K01513 ENPP1_3, CD203; ectonucleotide pyrophosphatase/phosphodiesterase family member 1/3 [EC:3.1.4.1 3.6.1.9]
D DYST_03978; K01194 TREH, treA, treF; alpha,alpha-trehalase [EC:3.2.1.28]
D DYST_04583; K01273 DPEP; membrane dipeptidase [EC:3.4.13.19]
D DYST_00562; K08257 E3.2.1.101; mannan endo-1,6-alpha-mannosidase [EC:3.2.1.101]
C 04091 Lectins [BR:ko04091]
C 04990 Domain-containing proteins not elsewhere classified [BR:ko04990]
D DYST_01568; K19519 TGFBI, BIGH3; transforming growth factor-beta-induced protein
D DYST_00285; K24790 POSTN; periostin
B
B 09185 Viral protein families
C 03200 Viral proteins [BR:ko03200]
C 03210 Viral fusion proteins [BR:ko03210]
B
B 09184 RNA family
C 03100 Non-coding RNAs [BR:ko03100]

## Sheet: Level 1-Not Included in BRITE
Level 1 KEGG Annotations for Not Included in Pathway or Brite
A09190 Not Included in Pathway or Brite
B
B 09191 Unclassified: metabolism
C 99980 Enzymes with EC numbers
D DYST_00505; K00091 E1.1.1.219; dihydroflavonol-4-reductase [EC:1.1.1.219]
D DYST_03447; K00154 E1.2.1.68; coniferyl-aldehyde dehydrogenase [EC:1.2.1.68]
D DYST_02262; K22419 VEP1; Delta4-3-oxosteroid 5beta-reductase [EC:1.3.1.3]
D DYST_00112; K00219 fadH; 2,4-dienoyl-CoA reductase (NADPH2) [EC:1.3.1.34]
D DYST_03035; K23256 curA; NADPH-dependent curcumin reductase [EC:1.3.1.-]
D DYST_00739; K07302 iorA; isoquinoline 1-oxidoreductase subunit alpha [EC:1.3.99.16]
D DYST_00738; K07303 iorB; isoquinoline 1-oxidoreductase subunit beta [EC:1.3.99.16]
D DYST_01493; K06988 fno; 8-hydroxy-5-deazaflavin:NADPH oxidoreductase [EC:1.5.1.40]
D DYST_02117; K00311 ETFDH; electron-transferring-flavoprotein dehydrogenase [EC:1.5.5.1]
D DYST_01268; K00344 qor, CRYZ; NADPH:quinone reductase [EC:1.6.5.5]
D DYST_02275; K00344 qor, CRYZ; NADPH:quinone reductase [EC:1.6.5.5]
D DYST_00246; K01118 acpD, azoR; FMN-dependent NADH-azoreductase [EC:1.7.1.17]
D DYST_00492; K03387 ahpF; NADH-dependent peroxiredoxin subunit F [EC:1.8.1.-]
D DYST_01157; K07304 msrA; peptide-methionine (S)-S-oxide reductase [EC:1.8.4.11]
D DYST_01577; K07304 msrA; peptide-methionine (S)-S-oxide reductase [EC:1.8.4.11]
D DYST_04046; K07304 msrA; peptide-methionine (S)-S-oxide reductase [EC:1.8.4.11]
D DYST_00465; K07305 msrB; peptide-methionine (R)-S-oxide reductase [EC:1.8.4.12]
D DYST_01764; K07305 msrB; peptide-methionine (R)-S-oxide reductase [EC:1.8.4.12]
D DYST_03911; K07305 msrB; peptide-methionine (R)-S-oxide reductase [EC:1.8.4.12]
D DYST_02471; K11209 yghU, yfcG; GSH-dependent disulfide-bond oxidoreductase [EC:1.8.4.-]
D DYST_03100; K11209 yghU, yfcG; GSH-dependent disulfide-bond oxidoreductase [EC:1.8.4.-]
D DYST_03997; K05810 yfiH; polyphenol oxidase [EC:1.10.3.-]
D DYST_00471; K00433 cpo; non-heme chloroperoxidase [EC:1.11.1.10]
D DYST_03622; K03564 BCP, PRXQ, DOT5; thioredoxin-dependent peroxiredoxin [EC:1.11.1.24]
D DYST_04610; K03564 BCP, PRXQ, DOT5; thioredoxin-dependent peroxiredoxin [EC:1.11.1.24]
D DYST_02163; K11065 tpx; thioredoxin-dependent peroxiredoxin [EC:1.11.1.24]
D DYST_00493; K24119 ahpC; NADH-dependent peroxiredoxin subunit C [EC:1.11.1.26]
D DYST_01731; K04063 osmC, ohr; lipoyl-dependent peroxiredoxin [EC:1.11.1.28]
D DYST_02626; K04063 osmC, ohr; lipoyl-dependent peroxiredoxin [EC:1.11.1.28]
D DYST_03935; K04063 osmC, ohr; lipoyl-dependent peroxiredoxin [EC:1.11.1.28]
D DYST_02763; K07223 yfeX; porphyrinogen peroxidase [EC:1.11.1.-]
D DYST_00129; K06911 PIR; quercetin 2,3-dioxygenase [EC:1.13.11.24]
D DYST_03129; K06911 PIR; quercetin 2,3-dioxygenase [EC:1.13.11.24]
D DYST_00915; K07336 K07336; PKHD-type hydroxylase [EC:1.14.11.-]
D DYST_01785; K07336 K07336; PKHD-type hydroxylase [EC:1.14.11.-]
D DYST_02720; K15537 AGMO; alkylglycerol monooxygenase [EC:1.14.16.5]
D DYST_00294; K23054 desC; sn-1 stearoyl-lipid 9-desaturase [EC:1.14.19.28]
D DYST_00183; K07229 yqjH; ferric-chelate reductase (NADPH) [EC:1.16.1.9]
D DYST_02730; K07229 yqjH; ferric-chelate reductase (NADPH) [EC:1.16.1.9]
D DYST_01779; K06324 cotA; spore coat protein A, manganese oxidase [EC:1.16.3.3]
D DYST_00494; K00528 fpr; ferredoxin/flavodoxin---NADP+ reductase [EC:1.18.1.2 1.19.1.1]
D DYST_02237; K00528 fpr; ferredoxin/flavodoxin---NADP+ reductase [EC:1.18.1.2 1.19.1.1]
D DYST_00253; K00537 arsC; arsenate reductase (glutaredoxin) [EC:1.20.4.1]
D DYST_02661; K03741 arsC; arsenate reductase (thioredoxin) [EC:1.20.4.4]
D DYST_01485; K14189 dltE; uncharacterized oxidoreductase [EC:1.-.-.-]
D DYST_01024; K00573 E2.1.1.77, pcm; protein-L-isoaspartate(D-aspartate) O-methyltransferase [EC:2.1.1.77]
D DYST_02433; K00573 E2.1.1.77, pcm; protein-L-isoaspartate(D-aspartate) O-methyltransferase [EC:2.1.1.77]
D DYST_04516; K00574 cfa; cyclopropane-fatty-acyl-phospholipid synthase [EC:2.1.1.79]
D DYST_01156; K00675 nhoA; N-hydroxyarylamine O-acetyltransferase [EC:2.3.1.118]
D DYST_03053; K22617 olsA; lyso-ornithine lipid O-acyltransferase [EC:2.3.1.270]
D DYST_04699; K03824 yhbS; putative acetyltransferase [EC:2.3.1.-]
D DYST_02482; K03827 yjaB; putative acetyltransferase [EC:2.3.1.-]
D DYST_01656; K03828 yjgM; putative acetyltransferase [EC:2.3.1.-]
D DYST_01658; K03829 yedL; putative acetyltransferase [EC:2.3.1.-]
D DYST_04096; K03829 yedL; putative acetyltransferase [EC:2.3.1.-]
D DYST_04504; K14660 nodE; nodulation protein E [EC:2.3.1.-]
D DYST_01659; K24217 mnaT; L-amino acid N-acyltransferase [EC:2.3.1.-]
D DYST_02580; K22757 QCT, qpcT; glutaminyl-peptide cyclotransferase [EC:2.3.2.5]
D DYST_00816; K00684 aat; leucyl/phenylalanyl-tRNA---protein transferase [EC:2.3.2.6]
D DYST_04886; K22452 tgpA; protein-glutamine gamma-glutamyltransferase [EC:2.3.2.13]
D DYST_04775; K21420 bpt; leucyl-tRNA---protein transferase [EC:2.3.2.29]
D DYST_00934; K00754 bshA; L-malate glycosyltransferase [EC:2.4.1.-]
D DYST_02864; K13670 pimF; putative glycosyltransferase [EC:2.4.-.-]
D DYST_00933; K19422 epsD; glycosyltransferase EpsD [EC:2.4.-.-]
D DYST_01999; K13292 lgt, umpA; phosphatidylglycerol---prolipoprotein diacylglyceryl transferase [EC:2.5.1.145]
D DYST_01810; K03734 apbE; FAD:protein FMN transferase [EC:2.7.1.180]
D DYST_00887; K09773 ppsR; [pyruvate, water dikinase]-phosphate phosphotransferase / [pyruvate, water dikinase] kinase [EC:2.7.4.28 2.7.11.33]
D DYST_02447; K00982 glnE; [glutamine synthetase] adenylyltransferase / [glutamine synthetase]-adenylyl-L-tyrosine phosphorylase [EC:2.7.7.42 2.7.7.89]
D DYST_03412; K13069 E2.7.7.65; diguanylate cyclase [EC:2.7.7.65]
D DYST_01547; K18967 dge1; diguanylate cyclase [EC:2.7.7.65]
D DYST_04723; K18967 dge1; diguanylate cyclase [EC:2.7.7.65]
D DYST_04527; K08997 SELENOO, selO; serine/tyrosine/threonine adenylyltransferase [EC:2.7.7.-]
D DYST_04130; K06023 hprK, ptsK; HPr kinase/phosphorylase [EC:2.7.11.- 2.7.4.-]
D DYST_02281; K01021 TPST; protein-tyrosine sulfotransferase [EC:2.8.2.20]
D DYST_03639; K01021 TPST; protein-tyrosine sulfotransferase [EC:2.8.2.20]
D DYST_04512; K03928 yvaK; carboxylesterase [EC:3.1.1.1]
D DYST_00354; K05970 SIAE; sialate O-acetylesterase [EC:3.1.1.53]
D DYST_03799; K23518 MACROD, ymdB; O-acetyl-ADP-ribose deacetylase [EC:3.1.1.106]
D DYST_04025; K07107 ybgC; acyl-CoA thioester hydrolase [EC:3.1.2.-]
D DYST_04635; K07107 ybgC; acyl-CoA thioester hydrolase [EC:3.1.2.-]
D DYST_02995; K08296 sixA; phosphohistidine phosphatase [EC:3.1.3.-]
D DYST_01414; K07814 K07814; cyclic di-GMP phosphodiesterase [EC:3.1.4.-]
D DYST_03375; K03424 tatD; TatD DNase family protein [EC:3.1.21.-]
D DYST_04653; K03424 tatD; TatD DNase family protein [EC:3.1.21.-]
D DYST_04852; K03424 tatD; TatD DNase family protein [EC:3.1.21.-]
D DYST_00048; K20542 bcsZ; endoglucanase [EC:3.2.1.4]
D DYST_00557; K18577 EBM; mannosylglycoprotein endo-beta-mannosidase [EC:3.2.1.152]
D DYST_00353; K18578 CEL74A; xyloglucan-specific exo-beta-1,4-glucanase [EC:3.2.1.155]
D DYST_00362; K01811 xylS, yicI; alpha-D-xyloside xylohydrolase [EC:3.2.1.177]
D DYST_03216; K01462 PDF, def; peptide deformylase [EC:3.5.1.88]
D DYST_04193; K01462 PDF, def; peptide deformylase [EC:3.5.1.88]
D DYST_02706; K07116 pvdQ, quiP; acyl-homoserine-lactone acylase [EC:3.5.1.97]
D DYST_04499; K07116 pvdQ, quiP; acyl-homoserine-lactone acylase [EC:3.5.1.97]
D DYST_00787; K22278 pgdA; peptidoglycan-N-acetylglucosamine deacetylase [EC:3.5.1.104]
D DYST_00937; K22278 pgdA; peptidoglycan-N-acetylglucosamine deacetylase [EC:3.5.1.104]
D DYST_00508; K03478 chbG; chitin disaccharide deacetylase [EC:3.5.1.105]
D DYST_03781; K09022 ridA, tdcF, RIDA; 2-iminobutanoate/2-iminopropanoate deaminase [EC:3.5.99.10]
D DYST_04631; K18665 NUDT8; nudix motif 8 [EC:3.6.1.-]
D DYST_04890; K25422 yceF; 7-methyl-GTP pyrophosphatase [EC:3.6.1.-]
D DYST_03792; K03924 moxR; MoxR-like ATPase [EC:3.6.3.-]
D DYST_03958; K03924 moxR; MoxR-like ATPase [EC:3.6.3.-]
D DYST_04888; K03924 moxR; MoxR-like ATPase [EC:3.6.3.-]
D DYST_04104; K03578 hrpA; ATP-dependent helicase HrpA [EC:3.6.4.13]
D DYST_03388; K03579 hrpB; ATP-dependent helicase HrpB [EC:3.6.4.13]
D DYST_01549; K10254 ohyA, sph; oleate hydratase [EC:4.2.1.53]
D DYST_04623; K23997 nnr; ADP-dependent NAD(P)H-hydrate dehydratase / NAD(P)H-hydrate epimerase [EC:4.2.1.136 5.1.99.6]
D DYST_03671; K19802 ycjG, ykfB; L-Ala-D/L-Glu epimerase [EC:5.1.1.20]
D DYST_03968; K18479 yihS; sulfoquinovose isomerase [EC:5.3.1.31]
D DYST_02413; K02558 mpl; UDP-N-acetylmuramate: L-alanyl-gamma-D-glutamyl-meso-diaminopimelate ligase [EC:6.3.2.45]
D DYST_01240; K03616 rnfB; H+/Na+-translocating ferredoxin:NAD+ oxidoreductase subunit B [EC:7.1.1.11 7.2.1.2]
D DYST_03837; K01533 copB; P-type Cu2+ transporter [EC:7.2.2.9]
D DYST_03470; K01531 mgtA, mgtB; P-type Mg2+ transporter [EC:7.2.2.14]
C 99981 Carbohydrate metabolism
C 99982 Energy metabolism
D DYST_01282; K02379 fdhD; FdhD protein
D DYST_04614; K05524 fdxA; ferredoxin
D DYST_01287; K02569 napC; cytochrome c-type protein NapC
D DYST_01093; K03521 fixA, etfB; electron transfer flavoprotein beta subunit
D DYST_02119; K03521 fixA, etfB; electron transfer flavoprotein beta subunit
D DYST_01416; K09165 K09165; dodecin
C 99983 Lipid metabolism
C 99984 Nucleotide metabolism
C 99985 Amino acid metabolism
D DYST_00404; K08234 yaeR; glyoxylase I family protein
D DYST_01288; K08234 yaeR; glyoxylase I family protein
D DYST_01802; K06997 yggS, PROSC; PLP dependent protein
D DYST_03303; K22479 argA; N-acetyltransferase
C 99986 Glycan metabolism
D DYST_00118; K19804 lapB; lipopolysaccharide assembly protein B
D DYST_00047; K20541 bcsB; cellulose synthase operon protein B
C 99987 Cofactor metabolism
D DYST_02505; K02498 hemY; HemY protein
D DYST_03290; K03688 ubiB, aarF; ubiquinone biosynthesis protein
D DYST_03291; K03690 ubiJ; ubiquinone biosynthesis accessory factor UbiJ
D DYST_03278; K09806 ubiK; ubiquinone biosynthesis accessory factor UbiK
C 99988 Secondary metabolism
D DYST_03157; K04753 sufI; suppressor of ftsI
D DYST_00857; K19784 chrR, NQR; chromate reductase, NAD(P)H dehydrogenase (quinone)
D DYST_04790; K19784 chrR, NQR; chromate reductase, NAD(P)H dehydrogenase (quinone)
C 99999 Others
D DYST_02348; K21831 choE; cholinesterase
D DYST_01267; K15977 K15977; putative oxidoreductase
D DYST_01398; K15977 K15977; putative oxidoreductase
D DYST_03965; K15977 K15977; putative oxidoreductase
D DYST_03145; K06999 K06999; phospholipase/carboxylesterase
D DYST_01438; K09181 yfiQ; acetyltransferase
B
B 09192 Unclassified: genetic information processing
C 99973 Transcription
D DYST_00855; K03704 cspA; cold shock protein
D DYST_01502; K03704 cspA; cold shock protein
D DYST_04563; K03704 cspA; cold shock protein
D DYST_04564; K03704 cspA; cold shock protein
D DYST_02948; K06959 tex; protein Tex
C 99974 Translation
C 99975 Protein processing
D DYST_00410; K06891 clpS; ATP-dependent Clp protease adaptor protein ClpS
D DYST_00905; K03545 tig; trigger factor
D DYST_01531; K02380 fdhE; FdhE protein
D DYST_00090; K03664 smpB; SsrA-binding protein
D DYST_03279; K07391 comM; magnesium chelatase family protein
D DYST_00766; K07397 yhfA; putative redox protein
D DYST_00221; K07400 nfuA; Fe/S biogenesis protein NfuA
D DYST_00740; K07402 xdhC; xanthine dehydrogenase accessory factor
D DYST_04750; K07403 nfeD; membrane-bound serine protease (ClpP class)
C 99976 Replication and repair
D DYST_04152; K07443 ybaZ; methylated-DNA-protein-cysteine methyltransferase related protein
D DYST_00203; K03630 radC; DNA repair protein RadC
D DYST_02980; K03630 radC; DNA repair protein RadC
D DYST_02517; K09760 rmuC; DNA recombination protein RmuC
D DYST_03883; K07460 yraN; putative endonuclease
D DYST_02597; K07461 K07461; putative endonuclease
D DYST_04730; K07461 K07461; putative endonuclease
D DYST_03218; K04096 smf; DNA processing protein
D DYST_00801; K07478 ycaJ; putative ATPase
D DYST_00280; K07483 K07483; transposase
D DYST_02228; K07486 K07486; transposase
D DYST_03742; K07486 K07486; transposase
D DYST_03709; K07487 K07487; transposase
D DYST_03727; K07487 K07487; transposase
D DYST_03173; K07491 rayT; REP-associated tyrosine transposase
D DYST_00279; K07497 K07497; putative transposase
D DYST_03574; K07497 K07497; putative transposase
C 99998 Others
D DYST_02185; K03972 pspE; phage shock protein E
D DYST_04881; K09747 ebfC; nucleoid-associated protein EbfC
B
B 09193 Unclassified: signaling and cellular processes
C 99977 Transport
D DYST_01795; K03293 TC.AAT; amino acid transporter, AAT family
D DYST_01047; K03294 TC.APA; basic amino acid/polyamine antiporter, APA family
D DYST_01048; K03294 TC.APA; basic amino acid/polyamine antiporter, APA family
D DYST_01606; K03294 TC.APA; basic amino acid/polyamine antiporter, APA family
D DYST_04474; K03294 TC.APA; basic amino acid/polyamine antiporter, APA family
D DYST_04532; K03294 TC.APA; basic amino acid/polyamine antiporter, APA family
D DYST_01247; K03296 TC.HAE1; hydrophobic/amphiphilic exporter-1 (mainly G- bacteria), HAE1 family
D DYST_02299; K03296 TC.HAE1; hydrophobic/amphiphilic exporter-1 (mainly G- bacteria), HAE1 family
D DYST_03802; K03296 TC.HAE1; hydrophobic/amphiphilic exporter-1 (mainly G- bacteria), HAE1 family
D DYST_02008; K03305 TC.POT; proton-dependent oligopeptide transporter, POT family
D DYST_02172; K03305 TC.POT; proton-dependent oligopeptide transporter, POT family
D DYST_02173; K03305 TC.POT; proton-dependent oligopeptide transporter, POT family
D DYST_00835; K03306 TC.PIT; inorganic phosphate transporter, PiT family
D DYST_04150; K03306 TC.PIT; inorganic phosphate transporter, PiT family
D DYST_00882; K03455 TC.KEF; monovalent cation:H+ antiporter-2, CPA2 family
C 99978 Cell growth
D DYST_02844; K06351 kipI; inhibitor of KinA
D DYST_02548; K22719 envC; murein hydrolase activator
C 99993 Cell motility
D DYST_01211; K08086 fimV; pilus assembly protein FimV
D DYST_02568; K15540 ecpD; chaperone protein EcpD
C 99995 Signaling proteins
D DYST_04189; K06200 cstA; carbon starvation protein
D DYST_01351; K06207 typA, bipA; GTP-binding protein
D DYST_01968; K06217 phoH, phoL; phosphate starvation-inducible protein PhoH and related proteins
D DYST_04609; K07175 phoH2; PhoH-like ATPase
D DYST_04540; K09767 yajQ; cyclic-di-GMP-binding protein
C 99992 Structural proteins
D DYST_00810; K03634 lolA; outer membrane lipoprotein carrier protein
D DYST_04393; K02494 lolB; outer membrane lipoprotein LolB
D DYST_02385; K03642 rlpA; rare lipoprotein A
D DYST_03777; K04754 mlaA, vacJ; phospholipid-binding lipoprotein MlaA
D DYST_01022; K06194 nlpD; lipoprotein NlpD
D DYST_03056; K07275 ompW; outer membrane protein
D DYST_04885; K07285 slp; outer membrane lipoprotein
D DYST_01425; K07290 yhjG; AsmA family protein
D DYST_04260; K07340 ybbJ; inner membrane protein
D DYST_02298; K02005 ABC.CD.TX; HlyD family secretion protein
D DYST_03806; K02005 ABC.CD.TX; HlyD family secretion protein
D DYST_04118; K06143 creD; inner membrane protein
D DYST_04839; K02197 ccmE; cytochrome c-type biogenesis protein CcmE
D DYST_04835; K02200 ccmH; cytochrome c-type biogenesis protein CcmH
D DYST_04836; K02200 ccmH; cytochrome c-type biogenesis protein CcmH
C 99994 Others
D DYST_01259; K02039 phoU; phosphate transport system protein
D DYST_02460; K03926 cutA; periplasmic divalent cation tolerance protein
D DYST_00853; K06201 cutC; copper homeostasis protein
D DYST_03906; K06195 apaG; ApaG protein
D DYST_03518; K07225 hmuS; putative hemin transport protein
D DYST_01431; K07233 pcoB, copB; copper resistance protein B
C 99979 Unclassified viral proteins
D DYST_03218; K04096 smf; DNA processing protein
D DYST_00090; K03664 smpB; SsrA-binding protein
B
B 09194 Poorly characterized
C 99996 General function prediction only
D DYST_03106; K02442 glpM; membrane protein GlpM
D DYST_01106; K03558 cvpA; membrane protein required for colicin V production
D DYST_01770; K06192 pqiB; paraquat-inducible protein B
D DYST_03422; K06877 K06877; DEAD/DEAH box helicase domain-containing protein
D DYST_00125; K06878 K06878; tRNA-binding protein
D DYST_02987; K07001 K07001; NTE family protein
D DYST_03068; K07001 K07001; NTE family protein
D DYST_03137; K07001 K07001; NTE family protein
D DYST_04079; K07001 K07001; NTE family protein
D DYST_00460; K07025 K07025; putative hydrolase of the HAD superfamily
D DYST_03228; K15724 erpA; iron-sulfur cluster insertion protein
D DYST_01843; K09014 sufB; Fe-S cluster assembly protein SufB
D DYST_01841; K09015 sufD; Fe-S cluster assembly protein SufD
D DYST_01238; K07038 K07038; inner membrane protein
D DYST_04382; K07058 K07058; membrane protein
D DYST_04901; K07082 K07082; UPF0755 protein
D DYST_01685; K02426 sufE; cysteine desulfuration protein SufE
D DYST_02932; K07146 K07146; UPF0176 protein
D DYST_00407; K07153 hflD; high frequency lysogenization protein
D DYST_02905; K04750 phnB; PhnB protein
D DYST_04724; K04750 phnB; PhnB protein
D DYST_00532; K11477 glcG; glc operon protein GlcG
D DYST_02663; K11811 arsH; arsenical resistance protein ArsH
D DYST_02006; K03744 lemA; LemA protein
D DYST_01771; K03808 pqiA; paraquat-inducible protein A
D DYST_02078; K08987 K08987; putative membrane protein
D DYST_00819; K08989 K08989; putative membrane protein
D DYST_02541; K09858 K09858; SEC-C motif domain protein
D DYST_01689; K09914 K09914; putative lipoprotein
D DYST_01098; K03931 ygjK; putative isomerase
D DYST_02939; K06193 phnA; protein PhnA
C 99997 Function unknown
D DYST_01837; K06872 K06872; uncharacterized protein
D DYST_02005; K06872 K06872; uncharacterized protein
D DYST_02417; K06889 K06889; uncharacterized protein
D DYST_01939; K06905 K06905; uncharacterized protein
D DYST_01748; K06940 K06940; uncharacterized protein
D DYST_03117; K06940 K06940; uncharacterized protein
D DYST_04755; K06977 K06977; uncharacterized protein
D DYST_03167; K06978 K06978; uncharacterized protein
D DYST_04787; K06978 K06978; uncharacterized protein
D DYST_02736; K06983 K06983; uncharacterized protein
D DYST_01331; K06992 K06992; uncharacterized protein
D DYST_00133; K06996 K06996; uncharacterized protein
D DYST_01076; K07003 K07003; uncharacterized protein
D DYST_01914; K07004 K07004; uncharacterized protein
D DYST_01172; K07017 K07017; uncharacterized protein
D DYST_03352; K07018 K07018; uncharacterized protein
D DYST_03052; K07019 K07019; uncharacterized protein
D DYST_01508; K07032 K07032; uncharacterized protein
D DYST_02415; K07032 K07032; uncharacterized protein
D DYST_01749; K07054 K07054; uncharacterized protein
D DYST_03631; K07077 K07077; uncharacterized protein
D DYST_01530; K07089 K07089; uncharacterized protein
D DYST_00027; K07090 K07090; uncharacterized protein
D DYST_02714; K07112 K07112; uncharacterized protein
D DYST_02715; K07112 K07112; uncharacterized protein
D DYST_01429; K07118 K07118; uncharacterized protein
D DYST_03884; K07121 K07121; uncharacterized protein
D DYST_00273; K07124 K07124; uncharacterized protein
D DYST_03966; K07124 K07124; uncharacterized protein
D DYST_00914; K07126 K07126; uncharacterized protein
D DYST_02070; K07126 K07126; uncharacterized protein
D DYST_02532; K07137 K07137; uncharacterized protein
D DYST_01900; K07148 K07148; uncharacterized protein
D DYST_02412; K07157 K07157; uncharacterized protein
D DYST_03481; K09117 K09117; uncharacterized protein
D DYST_03943; K09704 K09704; uncharacterized protein
D DYST_02551; K09705 K09705; uncharacterized protein
D DYST_01838; K09712 K09712; uncharacterized protein
D DYST_04543; K09768 K09768; uncharacterized protein
D DYST_00385; K09780 K09780; uncharacterized protein
D DYST_03840; K09792 K09792; uncharacterized protein
D DYST_02241; K09793 K09793; uncharacterized protein
D DYST_00092; K09801 K09801; uncharacterized protein
D DYST_02437; K09824 virK; uncharacterized protein
D DYST_02454; K09824 virK; uncharacterized protein
D DYST_03697; K09895 K09895; uncharacterized protein
D DYST_03445; K09902 K09902; uncharacterized protein
D DYST_00435; K09912 K09912; uncharacterized protein
D DYST_00814; K09919 K09919; uncharacterized protein
D DYST_03109; K09921 K09921; uncharacterized protein
D DYST_04561; K09927 K09927; uncharacterized protein
D DYST_03415; K09930 K09930; uncharacterized protein
D DYST_04465; K09940 K09940; uncharacterized protein
D DYST_04716; K09954 K09954; uncharacterized protein
D DYST_01608; K09955 K09955; uncharacterized protein
D DYST_02701; K09958 K09958; uncharacterized protein
D DYST_03155; K09965 K09965; uncharacterized protein
D DYST_04515; K09973 K09973; uncharacterized protein
D DYST_02537; K09975 K09975; uncharacterized protein
D DYST_02530; K09983 K09983; uncharacterized protein
D DYST_03191; K09984 K09984; uncharacterized protein
D DYST_00431; K09990 K09990; uncharacterized protein
D DYST_03421; K07502 yprB; uncharacterized protein
#VALUE!

## Sheet: Level 1- Human Diseases
A09160 Human Diseases
B
B 09161 Cancer: overview
C 05200 Pathways in cancer [PATH:ko05200]
D DYST_00637; K08738 CYC; cytochrome c
D DYST_00036; K00799 GST, gst; glutathione S-transferase [EC:2.5.1.18]
D DYST_01328; K00799 GST, gst; glutathione S-transferase [EC:2.5.1.18]
D DYST_01586; K00799 GST, gst; glutathione S-transferase [EC:2.5.1.18]
D DYST_01590; K00799 GST, gst; glutathione S-transferase [EC:2.5.1.18]
D DYST_01750; K00799 GST, gst; glutathione S-transferase [EC:2.5.1.18]
D DYST_02487; K00799 GST, gst; glutathione S-transferase [EC:2.5.1.18]
D DYST_02588; K00799 GST, gst; glutathione S-transferase [EC:2.5.1.18]
D DYST_02610; K00799 GST, gst; glutathione S-transferase [EC:2.5.1.18]
D DYST_02651; K00799 GST, gst; glutathione S-transferase [EC:2.5.1.18]
D DYST_02826; K00799 GST, gst; glutathione S-transferase [EC:2.5.1.18]
D DYST_03063; K00799 GST, gst; glutathione S-transferase [EC:2.5.1.18]
D DYST_03845; K00799 GST, gst; glutathione S-transferase [EC:2.5.1.18]
D DYST_00039; K01679 E4.2.1.2B, fumC, FH; fumarate hydratase, class II [EC:4.2.1.2]
D DYST_04575; K04079 HSP90A, htpG; molecular chaperone HtpG
C 05202 Transcriptional misregulation in cancer [PATH:ko05202]
C 05206 MicroRNAs in cancer [PATH:ko05206]
D DYST_00210; K00558 DNMT1, dcm; DNA (cytosine-5)-methyltransferase 1 [EC:2.1.1.37]
D DYST_01302; K00558 DNMT1, dcm; DNA (cytosine-5)-methyltransferase 1 [EC:2.1.1.37]
D DYST_01396; K01425 glsA, GLS; glutaminase [EC:3.5.1.2]
C 05205 Proteoglycans in cancer [PATH:ko05205]
D DYST_03444; K10380 ANK; ankyrin
D DYST_00867; K03685 rnc, DROSHA, RNT1; ribonuclease III [EC:3.1.26.3]
C 05204 Chemical carcinogenesis - DNA adducts [PATH:ko05204]
D DYST_00036; K00799 GST, gst; glutathione S-transferase [EC:2.5.1.18]
D DYST_01328; K00799 GST, gst; glutathione S-transferase [EC:2.5.1.18]
D DYST_01586; K00799 GST, gst; glutathione S-transferase [EC:2.5.1.18]
D DYST_01590; K00799 GST, gst; glutathione S-transferase [EC:2.5.1.18]
D DYST_01750; K00799 GST, gst; glutathione S-transferase [EC:2.5.1.18]
D DYST_02487; K00799 GST, gst; glutathione S-transferase [EC:2.5.1.18]
D DYST_02588; K00799 GST, gst; glutathione S-transferase [EC:2.5.1.18]
D DYST_02610; K00799 GST, gst; glutathione S-transferase [EC:2.5.1.18]
D DYST_02651; K00799 GST, gst; glutathione S-transferase [EC:2.5.1.18]
D DYST_02826; K00799 GST, gst; glutathione S-transferase [EC:2.5.1.18]
D DYST_03063; K00799 GST, gst; glutathione S-transferase [EC:2.5.1.18]
D DYST_03845; K00799 GST, gst; glutathione S-transferase [EC:2.5.1.18]
D DYST_03159; K17690 CYP3A5; cytochrome P450 family 3 subfamily A5 [EC:1.14.14.1]
C 05207 Chemical carcinogenesis - receptor activation [PATH:ko05207]
D DYST_04575; K04079 HSP90A, htpG; molecular chaperone HtpG
D DYST_03432; K08726 EPHX2; soluble epoxide hydrolase / lipid-phosphate phosphatase [EC:3.3.2.10 3.1.3.76]
D DYST_00036; K00799 GST, gst; glutathione S-transferase [EC:2.5.1.18]
D DYST_01328; K00799 GST, gst; glutathione S-transferase [EC:2.5.1.18]
D DYST_01586; K00799 GST, gst; glutathione S-transferase [EC:2.5.1.18]
D DYST_01590; K00799 GST, gst; glutathione S-transferase [EC:2.5.1.18]
D DYST_01750; K00799 GST, gst; glutathione S-transferase [EC:2.5.1.18]
D DYST_02487; K00799 GST, gst; glutathione S-transferase [EC:2.5.1.18]
D DYST_02588; K00799 GST, gst; glutathione S-transferase [EC:2.5.1.18]
D DYST_02610; K00799 GST, gst; glutathione S-transferase [EC:2.5.1.18]
D DYST_02651; K00799 GST, gst; glutathione S-transferase [EC:2.5.1.18]
D DYST_02826; K00799 GST, gst; glutathione S-transferase [EC:2.5.1.18]
D DYST_03063; K00799 GST, gst; glutathione S-transferase [EC:2.5.1.18]
D DYST_03845; K00799 GST, gst; glutathione S-transferase [EC:2.5.1.18]
C 05208 Chemical carcinogenesis - reactive oxygen species [PATH:ko05208]
D DYST_00036; K00799 GST, gst; glutathione S-transferase [EC:2.5.1.18]
D DYST_01328; K00799 GST, gst; glutathione S-transferase [EC:2.5.1.18]
D DYST_01586; K00799 GST, gst; glutathione S-transferase [EC:2.5.1.18]
D DYST_01590; K00799 GST, gst; glutathione S-transferase [EC:2.5.1.18]
D DYST_01750; K00799 GST, gst; glutathione S-transferase [EC:2.5.1.18]
D DYST_02487; K00799 GST, gst; glutathione S-transferase [EC:2.5.1.18]
D DYST_02588; K00799 GST, gst; glutathione S-transferase [EC:2.5.1.18]
D DYST_02610; K00799 GST, gst; glutathione S-transferase [EC:2.5.1.18]
D DYST_02651; K00799 GST, gst; glutathione S-transferase [EC:2.5.1.18]
D DYST_02826; K00799 GST, gst; glutathione S-transferase [EC:2.5.1.18]
D DYST_03063; K00799 GST, gst; glutathione S-transferase [EC:2.5.1.18]
D DYST_03845; K00799 GST, gst; glutathione S-transferase [EC:2.5.1.18]
D DYST_03493; K03953 NDUFA9; NADH dehydrogenase (ubiquinone) 1 alpha subcomplex subunit 9
D DYST_01963; K00411 UQCRFS1, RIP1, petA; ubiquinol-cytochrome c reductase iron-sulfur subunit [EC:7.1.1.8]
D DYST_01962; K00412 CYTB, petB; ubiquinol-cytochrome c reductase cytochrome b subunit
D DYST_01961; K00413 CYC1, CYT1, petC; ubiquinol-cytochrome c reductase cytochrome c1 subunit
D DYST_01951; K04564 SOD2; superoxide dismutase, Fe-Mn family [EC:1.15.1.1]
D DYST_01140; K03781 katE, CAT, catB, srpA; catalase [EC:1.11.1.6]
D DYST_03432; K08726 EPHX2; soluble epoxide hydrolase / lipid-phosphate phosphatase [EC:3.3.2.10 3.1.3.76]
C 05203 Viral carcinogenesis [PATH:ko05203]
D DYST_02158; K00873 PK, pyk; pyruvate kinase [EC:2.7.1.40]
C 05230 Central carbon metabolism in cancer [PATH:ko05230]
D DYST_02158; K00873 PK, pyk; pyruvate kinase [EC:2.7.1.40]
D DYST_01396; K01425 glsA, GLS; glutaminase [EC:3.5.1.2]
D DYST_00298; K00036 G6PD, zwf; glucose-6-phosphate 1-dehydrogenase [EC:1.1.1.49 1.1.1.363]
D DYST_03176; K00036 G6PD, zwf; glucose-6-phosphate 1-dehydrogenase [EC:1.1.1.49 1.1.1.363]
D DYST_03275; K01834 PGAM, gpmA; 2,3-bisphosphoglycerate-dependent phosphoglycerate mutase [EC:5.4.2.11]
D DYST_03364; K00031 IDH1, IDH2, icd; isocitrate dehydrogenase [EC:1.1.1.42]
D DYST_03643; K13780 SLC7A5, LAT1; solute carrier family 7 (L-type amino acid transporter), member 5
D DYST_04082; K13780 SLC7A5, LAT1; solute carrier family 7 (L-type amino acid transporter), member 5
C 05231 Choline metabolism in cancer [PATH:ko05231]
D DYST_02007; K00901 dgkA, DGK; diacylglycerol kinase (ATP) [EC:2.7.1.107]
C 05235 PD-L1 expression and PD-1 checkpoint pathway in cancer [PATH:ko05235]
B
B 09162 Cancer: specific types
C 05210 Colorectal cancer [PATH:ko05210]
D DYST_00637; K08738 CYC; cytochrome c
C 05212 Pancreatic cancer [PATH:ko05212]
C 05225 Hepatocellular carcinoma [PATH:ko05225]
D DYST_00036; K00799 GST, gst; glutathione S-transferase [EC:2.5.1.18]
D DYST_01328; K00799 GST, gst; glutathione S-transferase [EC:2.5.1.18]
D DYST_01586; K00799 GST, gst; glutathione S-transferase [EC:2.5.1.18]
D DYST_01590; K00799 GST, gst; glutathione S-transferase [EC:2.5.1.18]
D DYST_01750; K00799 GST, gst; glutathione S-transferase [EC:2.5.1.18]
D DYST_02487; K00799 GST, gst; glutathione S-transferase [EC:2.5.1.18]
D DYST_02588; K00799 GST, gst; glutathione S-transferase [EC:2.5.1.18]
D DYST_02610; K00799 GST, gst; glutathione S-transferase [EC:2.5.1.18]
D DYST_02651; K00799 GST, gst; glutathione S-transferase [EC:2.5.1.18]
D DYST_02826; K00799 GST, gst; glutathione S-transferase [EC:2.5.1.18]
D DYST_03063; K00799 GST, gst; glutathione S-transferase [EC:2.5.1.18]
D DYST_03845; K00799 GST, gst; glutathione S-transferase [EC:2.5.1.18]
C 05226 Gastric cancer [PATH:ko05226]
C 05214 Glioma [PATH:ko05214]
C 05216 Thyroid cancer [PATH:ko05216]
C 05221 Acute myeloid leukemia [PATH:ko05221]
C 05220 Chronic myeloid leukemia [PATH:ko05220]
C 05217 Basal cell carcinoma [PATH:ko05217]
C 05218 Melanoma [PATH:ko05218]
C 05211 Renal cell carcinoma [PATH:ko05211]
D DYST_00039; K01679 E4.2.1.2B, fumC, FH; fumarate hydratase, class II [EC:4.2.1.2]
C 05219 Bladder cancer [PATH:ko05219]
C 05215 Prostate cancer [PATH:ko05215]
D DYST_04575; K04079 HSP90A, htpG; molecular chaperone HtpG
C 05213 Endometrial cancer [PATH:ko05213]
C 05224 Breast cancer [PATH:ko05224]
C 05222 Small cell lung cancer [PATH:ko05222]
D DYST_00637; K08738 CYC; cytochrome c
C 05223 Non-small cell lung cancer [PATH:ko05223]
B
B 09172 Infectious disease: viral
C 05166 Human T-cell leukemia virus 1 infection [PATH:ko05166]
D DYST_00595; K03350 APC3, CDC27; anaphase-promoting complex subunit 3
C 05170 Human immunodeficiency virus 1 infection [PATH:ko05170]
D DYST_00637; K08738 CYC; cytochrome c
C 05161 Hepatitis B [PATH:ko05161]
D DYST_00637; K08738 CYC; cytochrome c
C 05160 Hepatitis C [PATH:ko05160]
D DYST_00637; K08738 CYC; cytochrome c
C 05171 Coronavirus disease - COVID-19 [PATH:ko05171]
C 05164 Influenza A [PATH:ko05164]
D DYST_00637; K08738 CYC; cytochrome c
C 05162 Measles [PATH:ko05162]
D DYST_00637; K08738 CYC; cytochrome c
C 05168 Herpes simplex virus 1 infection [PATH:ko05168]
D DYST_00637; K08738 CYC; cytochrome c
C 05163 Human cytomegalovirus infection [PATH:ko05163]
D DYST_00637; K08738 CYC; cytochrome c
C 05167 Kaposi sarcoma-associated herpesvirus infection [PATH:ko05167]
D DYST_00637; K08738 CYC; cytochrome c
D DYST_02252; K08770 UBC; ubiquitin C
C 05169 Epstein-Barr virus infection [PATH:ko05169]
D DYST_00637; K08738 CYC; cytochrome c
C 05165 Human papillomavirus infection [PATH:ko05165]
D DYST_02158; K00873 PK, pyk; pyruvate kinase [EC:2.7.1.40]
B
B 09171 Infectious disease: bacterial
C 05110 Vibrio cholerae infection [PATH:ko05110]
C 05120 Epithelial cell signaling in Helicobacter pylori infection [PATH:ko05120]
D DYST_03878; K03196 virB11, lvhB11; type IV secretion system protein VirB11 [EC:7.4.2.8]
C 05130 Pathogenic Escherichia coli infection [PATH:ko05130]
D DYST_02161; K00134 GAPDH, gapA; glyceraldehyde 3-phosphate dehydrogenase (phosphorylating) [EC:1.2.1.12]
D DYST_00637; K08738 CYC; cytochrome c
[truncated: 260 more rows]

[truncated: 1 more sheets: Modules]
