# Supplementary material for: Isolation and Genome Analysis of an Amoeba-Associated Bacterium Dyella terrae Strain Ely Copper Mine From Acid Rock Drainage in Vermont, United States
Source: Front Microbiol. 2022 May 23;13:856908. doi: 10.3389/fmicb.2022.856908 (PMC9169046; doi:10.3389/fmicb.2022.856908)
Supplement: Supplementary file 2 [file Table_3.XLSX]

## Sheet: Protein coding genes with K#s
KEGG annotations (K#s) of Dyella terrae KACC 12748 genome (BioProject: PRJNA523522)
There are a total of 1891 genes annotated with K#s
Protein coding gene	Annotated K#
lcl|SIZZ01000001.1_prot_TBR38676.1_1
lcl|SIZZ01000001.1_prot_TBR38677.1_2	K02946
lcl|SIZZ01000001.1_prot_TBR38678.1_3	K02906
lcl|SIZZ01000001.1_prot_TBR38679.1_4	K02926
lcl|SIZZ01000001.1_prot_TBR38680.1_5	K02892
lcl|SIZZ01000001.1_prot_TBR38681.1_6	K02886
lcl|SIZZ01000001.1_prot_TBR38682.1_7	K02965
lcl|SIZZ01000001.1_prot_TBR38683.1_8	K02890
lcl|SIZZ01000001.1_prot_TBR38684.1_9	K02982
lcl|SIZZ01000001.1_prot_TBR38685.1_10	K02878
lcl|SIZZ01000001.1_prot_TBR38686.1_11	K02904
lcl|SIZZ01000001.1_prot_TBR38687.1_12	K02961
lcl|SIZZ01000001.1_prot_TBR38688.1_13	K02874
lcl|SIZZ01000001.1_prot_TBR38689.1_14	K02895
lcl|SIZZ01000001.1_prot_TBR38690.1_15	K02931
lcl|SIZZ01000001.1_prot_TBR38691.1_16	K02954
lcl|SIZZ01000001.1_prot_TBR38692.1_17	K02994
lcl|SIZZ01000001.1_prot_TBR38693.1_18	K02933
lcl|SIZZ01000001.1_prot_TBR38694.1_19	K02881
lcl|SIZZ01000001.1_prot_TBR38695.1_20	K02988
lcl|SIZZ01000001.1_prot_TBR38696.1_21
lcl|SIZZ01000001.1_prot_TBR38697.1_22	K02876
lcl|SIZZ01000001.1_prot_TBR38698.1_23	K03076
lcl|SIZZ01000001.1_prot_TBR38699.1_24	K02952
lcl|SIZZ01000001.1_prot_TBR38700.1_25	K02948
lcl|SIZZ01000001.1_prot_TBR38701.1_26	K02986
lcl|SIZZ01000001.1_prot_TBR38702.1_27	K03040
lcl|SIZZ01000001.1_prot_TBR38703.1_28	K02879
lcl|SIZZ01000001.1_prot_TBR38704.1_29	K03611
lcl|SIZZ01000001.1_prot_TBR38705.1_30	K01626
lcl|SIZZ01000001.1_prot_TBR38706.1_31	K02433
lcl|SIZZ01000001.1_prot_TBR38707.1_32
lcl|SIZZ01000001.1_prot_TBR38708.1_33
lcl|SIZZ01000001.1_prot_TBR38709.1_34	K03649
lcl|SIZZ01000001.1_prot_TBR38710.1_35
lcl|SIZZ01000001.1_prot_TBR38711.1_36	K07669
lcl|SIZZ01000001.1_prot_TBR38712.1_37	K08301
lcl|SIZZ01000001.1_prot_TBR38713.1_38
lcl|SIZZ01000001.1_prot_TBR38714.1_39	K03568
lcl|SIZZ01000001.1_prot_TBR38715.1_40
lcl|SIZZ01000001.1_prot_TBR38716.1_41
lcl|SIZZ01000001.1_prot_TBR38717.1_42
lcl|SIZZ01000001.1_prot_TBR38718.1_43	K22505
lcl|SIZZ01000001.1_prot_TBR38719.1_44
lcl|SIZZ01000001.1_prot_TBR38720.1_45
lcl|SIZZ01000001.1_prot_TBR38721.1_46
lcl|SIZZ01000001.1_prot_TBR38722.1_47
lcl|SIZZ01000001.1_prot_TBR38723.1_48	K22504
lcl|SIZZ01000001.1_prot_TBR38724.1_49	K22511
lcl|SIZZ01000001.1_prot_TBR38725.1_50	K03230
lcl|SIZZ01000001.1_prot_TBR38726.1_51
lcl|SIZZ01000001.1_prot_TBR38727.1_52	K22506
lcl|SIZZ01000001.1_prot_TBR38728.1_53
lcl|SIZZ01000001.1_prot_TBR38729.1_54	K03225
lcl|SIZZ01000001.1_prot_TBR38730.1_55	K22507
lcl|SIZZ01000001.1_prot_TBR38731.1_56	K22508
lcl|SIZZ01000001.1_prot_TBR38732.1_57	K22509
lcl|SIZZ01000001.1_prot_TBR38733.1_58	K22510
lcl|SIZZ01000001.1_prot_TBR38734.1_59
lcl|SIZZ01000001.1_prot_TBR38735.1_60	K13285
lcl|SIZZ01000001.1_prot_TBR38736.1_61
lcl|SIZZ01000001.1_prot_TBR38737.1_62
lcl|SIZZ01000001.1_prot_TBR38738.1_63
lcl|SIZZ01000001.1_prot_TBR38739.1_64	K09889
lcl|SIZZ01000001.1_prot_TBR38740.1_65
lcl|SIZZ01000001.1_prot_TBR38741.1_66	K03592
lcl|SIZZ01000001.1_prot_TBR38742.1_67	K09940
lcl|SIZZ01000001.1_prot_TBR38743.1_68	K13789
lcl|SIZZ01000001.1_prot_TBR38744.1_69	K03602
lcl|SIZZ01000001.1_prot_TBR40624.1_70	K04075
lcl|SIZZ01000001.1_prot_TBR38745.1_71
lcl|SIZZ01000001.1_prot_TBR38746.1_72	K01962
lcl|SIZZ01000001.1_prot_TBR38747.1_73	K02337
lcl|SIZZ01000001.1_prot_TBR38748.1_74
lcl|SIZZ01000001.1_prot_TBR38749.1_75	K03294
lcl|SIZZ01000001.1_prot_TBR38750.1_76	K03470
lcl|SIZZ01000001.1_prot_TBR38751.1_77	K00748
lcl|SIZZ01000001.1_prot_TBR38752.1_78	K00677
lcl|SIZZ01000001.1_prot_TBR38753.1_79	K02372
lcl|SIZZ01000001.1_prot_TBR38754.1_80	K02536
lcl|SIZZ01000001.1_prot_TBR38755.1_81	K07277
lcl|SIZZ01000001.1_prot_TBR38756.1_82	K11749
lcl|SIZZ01000001.1_prot_TBR40625.1_83	K00099
lcl|SIZZ01000001.1_prot_TBR38757.1_84	K00981
lcl|SIZZ01000001.1_prot_TBR38758.1_85	K00806
lcl|SIZZ01000001.1_prot_TBR38759.1_86	K02838
lcl|SIZZ01000001.1_prot_TBR38760.1_87	K09903
lcl|SIZZ01000001.1_prot_TBR38761.1_88
lcl|SIZZ01000001.1_prot_TBR38762.1_89	K02357
lcl|SIZZ01000001.1_prot_TBR38763.1_90	K02967
lcl|SIZZ01000001.1_prot_TBR38764.1_91	K01265
lcl|SIZZ01000001.1_prot_TBR38765.1_92	K00990
lcl|SIZZ01000001.1_prot_TBR38766.1_93	K00674
lcl|SIZZ01000001.1_prot_TBR38767.1_94
lcl|SIZZ01000001.1_prot_TBR38768.1_95
lcl|SIZZ01000001.1_prot_TBR38769.1_96	K22736
lcl|SIZZ01000001.1_prot_TBR38770.1_97	K01439
lcl|SIZZ01000001.1_prot_TBR38771.1_98	K07116
lcl|SIZZ01000001.1_prot_TBR38772.1_99
lcl|SIZZ01000001.1_prot_TBR38773.1_100	K03574
lcl|SIZZ01000001.1_prot_TBR40626.1_101	K03574
lcl|SIZZ01000001.1_prot_TBR38774.1_102	K14660
lcl|SIZZ01000001.1_prot_TBR38775.1_103
lcl|SIZZ01000001.1_prot_TBR38776.1_104
lcl|SIZZ01000001.1_prot_TBR38777.1_105
lcl|SIZZ01000001.1_prot_TBR38778.1_106
lcl|SIZZ01000001.1_prot_TBR38779.1_107
lcl|SIZZ01000001.1_prot_TBR38780.1_108
lcl|SIZZ01000001.1_prot_TBR38781.1_109	K03928
lcl|SIZZ01000001.1_prot_TBR38782.1_110
lcl|SIZZ01000001.1_prot_TBR38783.1_111	K03800
lcl|SIZZ01000001.1_prot_TBR38784.1_112
lcl|SIZZ01000001.1_prot_TBR38785.1_113	K02621
lcl|SIZZ01000001.1_prot_TBR38786.1_114	K03933
lcl|SIZZ01000001.1_prot_TBR38787.1_115	K09973
lcl|SIZZ01000001.1_prot_TBR40627.1_116	K01259
lcl|SIZZ01000001.1_prot_TBR38788.1_117	K00574
lcl|SIZZ01000001.1_prot_TBR38789.1_118
lcl|SIZZ01000001.1_prot_TBR38790.1_119	K06199
lcl|SIZZ01000001.1_prot_TBR38791.1_120	K07552
lcl|SIZZ01000001.1_prot_TBR40628.1_121
lcl|SIZZ01000001.1_prot_TBR38792.1_122	K03608
lcl|SIZZ01000001.1_prot_TBR38793.1_123	K03609
lcl|SIZZ01000001.1_prot_TBR38794.1_124	K03610
lcl|SIZZ01000001.1_prot_TBR38795.1_125	K06977
lcl|SIZZ01000001.1_prot_TBR38796.1_126
lcl|SIZZ01000001.1_prot_TBR38797.1_127	K02479
lcl|SIZZ01000001.1_prot_TBR38798.1_128
lcl|SIZZ01000001.1_prot_TBR38799.1_129	K25152
lcl|SIZZ01000001.1_prot_TBR38800.1_130	K25151
lcl|SIZZ01000001.1_prot_TBR38801.1_131	K25153
lcl|SIZZ01000001.1_prot_TBR38802.1_132
lcl|SIZZ01000001.1_prot_TBR38803.1_133	K09796
lcl|SIZZ01000001.1_prot_TBR40629.1_134	K07152
lcl|SIZZ01000001.1_prot_TBR38804.1_135
lcl|SIZZ01000001.1_prot_TBR40630.1_136
lcl|SIZZ01000001.1_prot_TBR38805.1_137
lcl|SIZZ01000001.1_prot_TBR38806.1_138
lcl|SIZZ01000001.1_prot_TBR38807.1_139
lcl|SIZZ01000001.1_prot_TBR38808.1_140
lcl|SIZZ01000001.1_prot_TBR38809.1_141	K08289
lcl|SIZZ01000001.1_prot_TBR38810.1_142
lcl|SIZZ01000001.1_prot_TBR38811.1_143	K21420
lcl|SIZZ01000001.1_prot_TBR38812.1_144
lcl|SIZZ01000001.1_prot_TBR38813.1_145	K10805
lcl|SIZZ01000001.1_prot_TBR38814.1_146
lcl|SIZZ01000001.1_prot_TBR38815.1_147
lcl|SIZZ01000001.1_prot_TBR38816.1_148	K12297
lcl|SIZZ01000001.1_prot_TBR40631.1_149
lcl|SIZZ01000001.1_prot_TBR38817.1_150
lcl|SIZZ01000001.1_prot_TBR38818.1_151	K18912
lcl|SIZZ01000001.1_prot_TBR38819.1_152	K18911
lcl|SIZZ01000001.1_prot_TBR38820.1_153	K03723
lcl|SIZZ01000001.1_prot_TBR38821.1_154	K09181
lcl|SIZZ01000001.1_prot_TBR38822.1_155
lcl|SIZZ01000001.1_prot_TBR38823.1_156
lcl|SIZZ01000001.1_prot_TBR38824.1_157
lcl|SIZZ01000001.1_prot_TBR38825.1_158
lcl|SIZZ01000001.1_prot_TBR38826.1_159
lcl|SIZZ01000001.1_prot_TBR38827.1_160	K00639
lcl|SIZZ01000001.1_prot_TBR38828.1_161
lcl|SIZZ01000001.1_prot_TBR40632.1_162	K00060
lcl|SIZZ01000001.1_prot_TBR38829.1_163
lcl|SIZZ01000001.1_prot_TBR38830.1_164
lcl|SIZZ01000001.1_prot_TBR38831.1_165	K01673
lcl|SIZZ01000001.1_prot_TBR38832.1_166	K00791
lcl|SIZZ01000001.1_prot_TBR38833.1_167	K03666
lcl|SIZZ01000001.1_prot_TBR38834.1_168	K03665
lcl|SIZZ01000001.1_prot_TBR38835.1_169	K04088
lcl|SIZZ01000001.1_prot_TBR38836.1_170	K04087
lcl|SIZZ01000001.1_prot_TBR40633.1_171
lcl|SIZZ01000001.1_prot_TBR38837.1_172	K01939
lcl|SIZZ01000001.1_prot_TBR38838.1_173	K08776
lcl|SIZZ01000001.1_prot_TBR40634.1_174
lcl|SIZZ01000001.1_prot_TBR38839.1_175
lcl|SIZZ01000001.1_prot_TBR38840.1_176	K00281
lcl|SIZZ01000001.1_prot_TBR38841.1_177	K08234
lcl|SIZZ01000001.1_prot_TBR38842.1_178
lcl|SIZZ01000001.1_prot_TBR40635.1_179	K12573
lcl|SIZZ01000001.1_prot_TBR38843.1_180	K03218
lcl|SIZZ01000001.1_prot_TBR38844.1_181
lcl|SIZZ01000001.1_prot_TBR38845.1_182	K11741
lcl|SIZZ01000001.1_prot_TBR38846.1_183	K02039
lcl|SIZZ01000001.1_prot_TBR38847.1_184	K02036
lcl|SIZZ01000001.1_prot_TBR38848.1_185	K02038
lcl|SIZZ01000001.1_prot_TBR38849.1_186	K02037
lcl|SIZZ01000001.1_prot_TBR40636.1_187	K02040
lcl|SIZZ01000001.1_prot_TBR38850.1_188	K03683
lcl|SIZZ01000001.1_prot_TBR38851.1_189
lcl|SIZZ01000001.1_prot_TBR38852.1_190
lcl|SIZZ01000001.1_prot_TBR38853.1_191
lcl|SIZZ01000001.1_prot_TBR38854.1_192	K01673
lcl|SIZZ01000001.1_prot_TBR38855.1_193
lcl|SIZZ01000001.1_prot_TBR38856.1_194	K10773
lcl|SIZZ01000001.1_prot_TBR38857.1_195	K03616
lcl|SIZZ01000001.1_prot_TBR38858.1_196	K01874
lcl|SIZZ01000001.1_prot_TBR38859.1_197	K07038
lcl|SIZZ01000001.1_prot_TBR38860.1_198
lcl|SIZZ01000001.1_prot_TBR38861.1_199	K01560
lcl|SIZZ01000001.1_prot_TBR38862.1_200	K02444
lcl|SIZZ01000001.1_prot_TBR38863.1_201
lcl|SIZZ01000001.1_prot_TBR38864.1_202
lcl|SIZZ01000001.1_prot_TBR38865.1_203
lcl|SIZZ01000001.1_prot_TBR38866.1_204	K03593
lcl|SIZZ01000001.1_prot_TBR40637.1_205
lcl|SIZZ01000001.1_prot_TBR38867.1_206	K01494
lcl|SIZZ01000001.1_prot_TBR38868.1_207
lcl|SIZZ01000001.1_prot_TBR38869.1_208
lcl|SIZZ01000001.1_prot_TBR38870.1_209	K01061
lcl|SIZZ01000001.1_prot_TBR38871.1_210	K14441
lcl|SIZZ01000001.1_prot_TBR40638.1_211
lcl|SIZZ01000001.1_prot_TBR40639.1_212	K02044
lcl|SIZZ01000001.1_prot_TBR38872.1_213
lcl|SIZZ01000001.1_prot_TBR38873.1_214	K04760
lcl|SIZZ01000001.1_prot_TBR38874.1_215	K06915
lcl|SIZZ01000001.1_prot_TBR38875.1_216
lcl|SIZZ01000001.1_prot_TBR40640.1_217
lcl|SIZZ01000001.1_prot_TBR38876.1_218	K01613
lcl|SIZZ01000001.1_prot_TBR38877.1_219	K07320
lcl|SIZZ01000001.1_prot_TBR38878.1_220	K03790
lcl|SIZZ01000001.1_prot_TBR38879.1_221	K01736
lcl|SIZZ01000001.1_prot_TBR38880.1_222	K00015
lcl|SIZZ01000001.1_prot_TBR38881.1_223	K00133
lcl|SIZZ01000001.1_prot_TBR38882.1_224
lcl|SIZZ01000001.1_prot_TBR38883.1_225	K08086
lcl|SIZZ01000001.1_prot_TBR38884.1_226	K06173
lcl|SIZZ01000001.1_prot_TBR38885.1_227	K01817
lcl|SIZZ01000001.1_prot_TBR38886.1_228
lcl|SIZZ01000001.1_prot_TBR38887.1_229	K01696
lcl|SIZZ01000001.1_prot_TBR38888.1_230	K01695
lcl|SIZZ01000001.1_prot_TBR38889.1_231	K01963
lcl|SIZZ01000001.1_prot_TBR38890.1_232
lcl|SIZZ01000001.1_prot_TBR38891.1_233
lcl|SIZZ01000001.1_prot_TBR38892.1_234
lcl|SIZZ01000001.1_prot_TBR38893.1_235
lcl|SIZZ01000001.1_prot_TBR38894.1_236
lcl|SIZZ01000001.1_prot_TBR38895.1_237	K01885
lcl|SIZZ01000001.1_prot_TBR38896.1_238
lcl|SIZZ01000001.1_prot_TBR38897.1_239	K09823
lcl|SIZZ01000001.1_prot_TBR38898.1_240	K02014
lcl|SIZZ01000001.1_prot_TBR38899.1_241
lcl|SIZZ01000001.1_prot_TBR38900.1_242	K16264
lcl|SIZZ01000001.1_prot_TBR38901.1_243
lcl|SIZZ01000001.1_prot_TBR38902.1_244	K09946
lcl|SIZZ01000001.1_prot_TBR38903.1_245	K01468
lcl|SIZZ01000001.1_prot_TBR38904.1_246
lcl|SIZZ01000001.1_prot_TBR38905.1_247
lcl|SIZZ01000001.1_prot_TBR38906.1_248	K05603
lcl|SIZZ01000001.1_prot_TBR38907.1_249
lcl|SIZZ01000001.1_prot_TBR38908.1_250
lcl|SIZZ01000001.1_prot_TBR38909.1_251
lcl|SIZZ01000001.1_prot_TBR38910.1_252
lcl|SIZZ01000001.1_prot_TBR38911.1_253	K07662
lcl|SIZZ01000001.1_prot_TBR38912.1_254	K02484
lcl|SIZZ01000001.1_prot_TBR38913.1_255
lcl|SIZZ01000001.1_prot_TBR38914.1_256
lcl|SIZZ01000001.1_prot_TBR38915.1_257	K08224
lcl|SIZZ01000001.1_prot_TBR38916.1_258	K01513
lcl|SIZZ01000001.1_prot_TBR38917.1_259
lcl|SIZZ01000001.1_prot_TBR38918.1_260	K00567
lcl|SIZZ01000001.1_prot_TBR38919.1_261	K13529
lcl|SIZZ01000001.1_prot_TBR38920.1_262	K01712
lcl|SIZZ01000001.1_prot_TBR40641.1_263
lcl|SIZZ01000001.1_prot_TBR38921.1_264
lcl|SIZZ01000001.1_prot_TBR40642.1_265
lcl|SIZZ01000001.1_prot_TBR38922.1_266	K07304
lcl|SIZZ01000001.1_prot_TBR38923.1_267	K00675
lcl|SIZZ01000001.1_prot_TBR38924.1_268
lcl|SIZZ01000001.1_prot_TBR38925.1_269
lcl|SIZZ01000001.1_prot_TBR38926.1_270
lcl|SIZZ01000001.1_prot_TBR38927.1_271	K14206
lcl|SIZZ01000001.1_prot_TBR38928.1_272
lcl|SIZZ01000001.1_prot_TBR38929.1_273
lcl|SIZZ01000001.1_prot_TBR38930.1_274
lcl|SIZZ01000001.1_prot_TBR38931.1_275
lcl|SIZZ01000001.1_prot_TBR38932.1_276	K06177
lcl|SIZZ01000001.1_prot_TBR38933.1_277	K00564
lcl|SIZZ01000001.1_prot_TBR38934.1_278	K06183
lcl|SIZZ01000001.1_prot_TBR38935.1_279	K08997
lcl|SIZZ01000001.1_prot_TBR38936.1_280	K03672
lcl|SIZZ01000001.1_prot_TBR40643.1_281
lcl|SIZZ01000001.1_prot_TBR38937.1_282
lcl|SIZZ01000001.1_prot_TBR38938.1_283
lcl|SIZZ01000001.1_prot_TBR38939.1_284	K04750
lcl|SIZZ01000001.1_prot_TBR38940.1_285
lcl|SIZZ01000001.1_prot_TBR38941.1_286	K01626
lcl|SIZZ01000001.1_prot_TBR38942.1_287	K04063
lcl|SIZZ01000001.1_prot_TBR38943.1_288	K06975
lcl|SIZZ01000001.1_prot_TBR38944.1_289
lcl|SIZZ01000001.1_prot_TBR38945.1_290	K09767
lcl|SIZZ01000001.1_prot_TBR38946.1_291
lcl|SIZZ01000001.1_prot_TBR38947.1_292
lcl|SIZZ01000001.1_prot_TBR38948.1_293
lcl|SIZZ01000001.1_prot_TBR38949.1_294	K09768
lcl|SIZZ01000001.1_prot_TBR38950.1_295
lcl|SIZZ01000001.1_prot_TBR38951.1_296
lcl|SIZZ01000001.1_prot_TBR38952.1_297
lcl|SIZZ01000001.1_prot_TBR38953.1_298
lcl|SIZZ01000001.1_prot_TBR40644.1_299
lcl|SIZZ01000001.1_prot_TBR38954.1_300	K11102
lcl|SIZZ01000001.1_prot_TBR38955.1_301
lcl|SIZZ01000001.1_prot_TBR38956.1_302	K00763
lcl|SIZZ01000001.1_prot_TBR38957.1_303	K02073
lcl|SIZZ01000001.1_prot_TBR38958.1_304	K02072
lcl|SIZZ01000001.1_prot_TBR38959.1_305	K02071
lcl|SIZZ01000001.1_prot_TBR38960.1_306	K00432
lcl|SIZZ01000001.1_prot_TBR38961.1_307	K07259
lcl|SIZZ01000001.1_prot_TBR38962.1_308	K03327
lcl|SIZZ01000001.1_prot_TBR38963.1_309	K03775
lcl|SIZZ01000001.1_prot_TBR38964.1_310
lcl|SIZZ01000001.1_prot_TBR38965.1_311	K01058
lcl|SIZZ01000001.1_prot_TBR40645.1_312
lcl|SIZZ01000001.1_prot_TBR40646.1_313	K09927
lcl|SIZZ01000001.1_prot_TBR38966.1_314
lcl|SIZZ01000001.1_prot_TBR38967.1_315	K03704
lcl|SIZZ01000001.1_prot_TBR38968.1_316	K03704
lcl|SIZZ01000001.1_prot_TBR40647.1_317
lcl|SIZZ01000001.1_prot_TBR38969.1_318
lcl|SIZZ01000001.1_prot_TBR40648.1_319
lcl|SIZZ01000001.1_prot_TBR38970.1_320
lcl|SIZZ01000001.1_prot_TBR38971.1_321
lcl|SIZZ01000001.1_prot_TBR38972.1_322	K22132
lcl|SIZZ01000001.1_prot_TBR38973.1_323	K00023
lcl|SIZZ01000001.1_prot_TBR38974.1_324	K01894
lcl|SIZZ01000001.1_prot_TBR38975.1_325	K03799
lcl|SIZZ01000001.1_prot_TBR38976.1_326	K04079
lcl|SIZZ01000001.1_prot_TBR40649.1_327	K24180
lcl|SIZZ01000001.1_prot_TBR38977.1_328	K04762
lcl|SIZZ01000001.1_prot_TBR38978.1_329	K02485
lcl|SIZZ01000001.1_prot_TBR38979.1_330	K16137
lcl|SIZZ01000001.1_prot_TBR38980.1_331	K00799
lcl|SIZZ01000001.1_prot_TBR38981.1_332	K03555
lcl|SIZZ01000001.1_prot_TBR38982.1_333	K03743
lcl|SIZZ01000001.1_prot_TBR38983.1_334	K03553
lcl|SIZZ01000001.1_prot_TBR38984.1_335	K03565
lcl|SIZZ01000001.1_prot_TBR38985.1_336	K01872
lcl|SIZZ01000001.1_prot_TBR38986.1_337	K03563
lcl|SIZZ01000001.1_prot_TBR40650.1_338
lcl|SIZZ01000001.1_prot_TBR38987.1_339	K23239
lcl|SIZZ01000001.1_prot_TBR38988.1_340
lcl|SIZZ01000001.1_prot_TBR38989.1_341	K03269
lcl|SIZZ01000001.1_prot_TBR38990.1_342	K03767
lcl|SIZZ01000001.1_prot_TBR38991.1_343	K01524
lcl|SIZZ01000001.1_prot_TBR38992.1_344	K00937
lcl|SIZZ01000001.1_prot_TBR38993.1_345	K07636
lcl|SIZZ01000001.1_prot_TBR38994.1_346	K07657
lcl|SIZZ01000001.1_prot_TBR38995.1_347	K01423
lcl|SIZZ01000001.1_prot_TBR38996.1_348	K03676
lcl|SIZZ01000001.1_prot_TBR38997.1_349
lcl|SIZZ01000001.1_prot_TBR38998.1_350	K00030
lcl|SIZZ01000001.1_prot_TBR38999.1_351
lcl|SIZZ01000001.1_prot_TBR39000.1_352	K03088
lcl|SIZZ01000001.1_prot_TBR39001.1_353	K12979
lcl|SIZZ01000001.1_prot_TBR39002.1_354	K00941
lcl|SIZZ01000001.1_prot_TBR39003.1_355	K07175
lcl|SIZZ01000001.1_prot_TBR39004.1_356	K03564
lcl|SIZZ01000001.1_prot_TBR40651.1_357	K03567
lcl|SIZZ01000001.1_prot_TBR39005.1_358	K01714
lcl|SIZZ01000001.1_prot_TBR39006.1_359
lcl|SIZZ01000001.1_prot_TBR39007.1_360
lcl|SIZZ01000001.1_prot_TBR39008.1_361	K01710
lcl|SIZZ01000001.1_prot_TBR39009.1_362	K05524
lcl|SIZZ01000001.1_prot_TBR39010.1_363	K00970
lcl|SIZZ01000001.1_prot_TBR39011.1_364	K00950
lcl|SIZZ01000001.1_prot_TBR39012.1_365	K00606
lcl|SIZZ01000001.1_prot_TBR39013.1_366	K01918
lcl|SIZZ01000001.1_prot_TBR39014.1_367	K01579
lcl|SIZZ01000001.1_prot_TBR39015.1_368	K01810
lcl|SIZZ01000001.1_prot_TBR39016.1_369	K18979
lcl|SIZZ01000001.1_prot_TBR40652.1_370	K23997
lcl|SIZZ01000001.1_prot_TBR39017.1_371	K06925
lcl|SIZZ01000001.1_prot_TBR39018.1_372	K01448
lcl|SIZZ01000001.1_prot_TBR39019.1_373	K03572
lcl|SIZZ01000001.1_prot_TBR39020.1_374
lcl|SIZZ01000001.1_prot_TBR39021.1_375	K01715
lcl|SIZZ01000001.1_prot_TBR39022.1_376	K03773
lcl|SIZZ01000001.1_prot_TBR39023.1_377
lcl|SIZZ01000001.1_prot_TBR39024.1_378	K18665
lcl|SIZZ01000001.1_prot_TBR39025.1_379	K01011
lcl|SIZZ01000001.1_prot_TBR39026.1_380	K13238
lcl|SIZZ01000001.1_prot_TBR39027.1_381
lcl|SIZZ01000001.1_prot_TBR39028.1_382	K07107
lcl|SIZZ01000001.1_prot_TBR39029.1_383	K03701
lcl|SIZZ01000001.1_prot_384
lcl|SIZZ01000001.1_prot_TBR39030.1_385	K02888
lcl|SIZZ01000001.1_prot_TBR39031.1_386	K02899
lcl|SIZZ01000001.1_prot_TBR39032.1_387	K03979
lcl|SIZZ01000001.1_prot_TBR39033.1_388
lcl|SIZZ01000001.1_prot_TBR39034.1_389
lcl|SIZZ01000001.1_prot_TBR40653.1_390
lcl|SIZZ01000001.1_prot_TBR39035.1_391	K02968
lcl|SIZZ01000001.1_prot_TBR39036.1_392	K03980
lcl|SIZZ01000001.1_prot_TBR39037.1_393	K11753
lcl|SIZZ01000001.1_prot_TBR39038.1_394	K01870
lcl|SIZZ01000001.1_prot_TBR39039.1_395	K03101
lcl|SIZZ01000001.1_prot_TBR39040.1_396	K03527
lcl|SIZZ01000001.1_prot_TBR39041.1_397
lcl|SIZZ01000001.1_prot_TBR39042.1_398	K07687
lcl|SIZZ01000001.1_prot_TBR39043.1_399	K07688
lcl|SIZZ01000001.1_prot_TBR39044.1_400
lcl|SIZZ01000001.1_prot_TBR39045.1_401	K05275
lcl|SIZZ01000001.1_prot_TBR40654.1_402	K07017
lcl|SIZZ01000001.1_prot_TBR39046.1_403
lcl|SIZZ01000001.1_prot_TBR39047.1_404	K02362
lcl|SIZZ01000001.1_prot_TBR39048.1_405
lcl|SIZZ01000001.1_prot_TBR39049.1_406	K17836
lcl|SIZZ01000001.1_prot_TBR39050.1_407	K02168
lcl|SIZZ01000001.1_prot_TBR40655.1_408
lcl|SIZZ01000001.1_prot_TBR39051.1_409
lcl|SIZZ01000001.1_prot_TBR39052.1_410
lcl|SIZZ01000001.1_prot_TBR39053.1_411
lcl|SIZZ01000001.1_prot_TBR39054.1_412
lcl|SIZZ01000001.1_prot_TBR39055.1_413
lcl|SIZZ01000001.1_prot_TBR39056.1_414	K09012
lcl|SIZZ01000001.1_prot_TBR39057.1_415
lcl|SIZZ01000001.1_prot_TBR39058.1_416	K22105
lcl|SIZZ01000001.1_prot_TBR39059.1_417	K22770
lcl|SIZZ01000001.1_prot_TBR39060.1_418	K22769
lcl|SIZZ01000001.1_prot_TBR40656.1_419	K12262
lcl|SIZZ01000001.1_prot_TBR39061.1_420	K22736
lcl|SIZZ01000001.1_prot_TBR39062.1_421
lcl|SIZZ01000001.1_prot_TBR39063.1_422	K14708
lcl|SIZZ01000001.1_prot_TBR39064.1_423	K03640
lcl|SIZZ01000001.1_prot_TBR39065.1_424
lcl|SIZZ01000001.1_prot_TBR39066.1_425
lcl|SIZZ01000001.1_prot_TBR39067.1_426
lcl|SIZZ01000001.1_prot_TBR39068.1_427
lcl|SIZZ01000001.1_prot_TBR39069.1_428
lcl|SIZZ01000001.1_prot_TBR39070.1_429	K12685
lcl|SIZZ01000001.1_prot_430
lcl|SIZZ01000001.1_prot_TBR39071.1_431	K11003
lcl|SIZZ01000001.1_prot_TBR39072.1_432
lcl|SIZZ01000001.1_prot_TBR39073.1_433	K19591
lcl|SIZZ01000001.1_prot_TBR39074.1_434	K17686
lcl|SIZZ01000001.1_prot_TBR39075.1_435
lcl|SIZZ01000001.1_prot_TBR39076.1_436	K08139
lcl|SIZZ01000001.1_prot_TBR39077.1_437
lcl|SIZZ01000001.1_prot_TBR39078.1_438	K13979
lcl|SIZZ01000001.1_prot_TBR39079.1_439
lcl|SIZZ01000001.1_prot_TBR39080.1_440
lcl|SIZZ01000001.1_prot_TBR39081.1_441	K01652
lcl|SIZZ01000001.1_prot_TBR39082.1_442	K03601
lcl|SIZZ01000001.1_prot_TBR39083.1_443	K06131
lcl|SIZZ01000001.1_prot_TBR39084.1_444
lcl|SIZZ01000001.1_prot_TBR39085.1_445
lcl|SIZZ01000001.1_prot_TBR39086.1_446	K11754
lcl|SIZZ01000001.1_prot_TBR39087.1_447
lcl|SIZZ01000001.1_prot_TBR39088.1_448	K03558
lcl|SIZZ01000001.1_prot_TBR39089.1_449	K00764
lcl|SIZZ01000001.1_prot_TBR39090.1_450
lcl|SIZZ01000001.1_prot_TBR40657.1_451	K11066
lcl|SIZZ01000001.1_prot_TBR39091.1_452
lcl|SIZZ01000001.1_prot_TBR39092.1_453
lcl|SIZZ01000001.1_prot_TBR39093.1_454
lcl|SIZZ01000001.1_prot_TBR39094.1_455
lcl|SIZZ01000001.1_prot_TBR39095.1_456
lcl|SIZZ01000001.1_prot_TBR39096.1_457
lcl|SIZZ01000001.1_prot_TBR39097.1_458	K01892
lcl|SIZZ01000001.1_prot_TBR39098.1_459	K01745
lcl|SIZZ01000001.1_prot_TBR39099.1_460
lcl|SIZZ01000001.1_prot_TBR39100.1_461
lcl|SIZZ01000001.1_prot_TBR39101.1_462	K00765
lcl|SIZZ01000001.1_prot_TBR39102.1_463	K00013
lcl|SIZZ01000001.1_prot_TBR39103.1_464	K00817
lcl|SIZZ01000001.1_prot_TBR39104.1_465	K01089
lcl|SIZZ01000001.1_prot_TBR39105.1_466	K02501
lcl|SIZZ01000001.1_prot_TBR39106.1_467	K01814
lcl|SIZZ01000001.1_prot_TBR39107.1_468	K02500
lcl|SIZZ01000001.1_prot_TBR39108.1_469	K11755
lcl|SIZZ01000001.1_prot_TBR39109.1_470
lcl|SIZZ01000001.1_prot_TBR39110.1_471	K09880
lcl|SIZZ01000001.1_prot_TBR39111.1_472	K08967
lcl|SIZZ01000001.1_prot_TBR39112.1_473	K08964
lcl|SIZZ01000001.1_prot_TBR39113.1_474
lcl|SIZZ01000001.1_prot_TBR39114.1_475	K03294
lcl|SIZZ01000001.1_prot_TBR39115.1_476	K13863
lcl|SIZZ01000001.1_prot_TBR39116.1_477
lcl|SIZZ01000001.1_prot_TBR39117.1_478
lcl|SIZZ01000001.1_prot_TBR39118.1_479	K00452
lcl|SIZZ01000001.1_prot_TBR39119.1_480	K02622
lcl|SIZZ01000001.1_prot_TBR39120.1_481	K01262
lcl|SIZZ01000001.1_prot_TBR39121.1_482	K01937
lcl|SIZZ01000001.1_prot_TBR39122.1_483	K01627
lcl|SIZZ01000001.1_prot_TBR39123.1_484	K01689
lcl|SIZZ01000001.1_prot_TBR39124.1_485	K05589
lcl|SIZZ01000001.1_prot_TBR39125.1_486	K00991
lcl|SIZZ01000001.1_prot_TBR40658.1_487	K01770
lcl|SIZZ01000001.1_prot_TBR39126.1_488	K06213
lcl|SIZZ01000001.1_prot_TBR39127.1_489	K06176
lcl|SIZZ01000001.1_prot_TBR39128.1_490
lcl|SIZZ01000001.1_prot_TBR39129.1_491	K03787
lcl|SIZZ01000001.1_prot_TBR39130.1_492	K00573
lcl|SIZZ01000001.1_prot_TBR39131.1_493
lcl|SIZZ01000001.1_prot_TBR39132.1_494	K06194
lcl|SIZZ01000001.1_prot_TBR39133.1_495
lcl|SIZZ01000001.1_prot_TBR39134.1_496	K07574
lcl|SIZZ01000001.1_prot_TBR39135.1_497	K02427
lcl|SIZZ01000001.1_prot_TBR40659.1_498	K03798
lcl|SIZZ01000001.1_prot_TBR39136.1_499
lcl|SIZZ01000001.1_prot_TBR39137.1_500
lcl|SIZZ01000001.1_prot_TBR39138.1_501	K00641
lcl|SIZZ01000001.1_prot_TBR39139.1_502	K02200
lcl|SIZZ01000001.1_prot_TBR39140.1_503	K02200
lcl|SIZZ01000001.1_prot_TBR39141.1_504	K02199
lcl|SIZZ01000001.1_prot_TBR39142.1_505	K02198
lcl|SIZZ01000001.1_prot_TBR39143.1_506	K02197
lcl|SIZZ01000001.1_prot_TBR39144.1_507
lcl|SIZZ01000001.1_prot_TBR39145.1_508	K02195
lcl|SIZZ01000001.1_prot_TBR39146.1_509	K02194
lcl|SIZZ01000001.1_prot_TBR39147.1_510	K02193
lcl|SIZZ01000001.1_prot_TBR39148.1_511
lcl|SIZZ01000001.1_prot_TBR39149.1_512	K00486
lcl|SIZZ01000001.1_prot_TBR39150.1_513	K00023
lcl|SIZZ01000001.1_prot_TBR39151.1_514
lcl|SIZZ01000001.1_prot_TBR39152.1_515	K03446
lcl|SIZZ01000001.1_prot_TBR39153.1_516	K03543
lcl|SIZZ01000001.1_prot_TBR39154.1_517	K15550
lcl|SIZZ01000001.1_prot_TBR40660.1_518
lcl|SIZZ01000001.1_prot_TBR39155.1_519	K03424
lcl|SIZZ01000001.1_prot_TBR39156.1_520
lcl|SIZZ01000001.1_prot_TBR40661.1_521
lcl|SIZZ01000001.1_prot_TBR40662.1_522
lcl|SIZZ01000001.1_prot_TBR40663.1_523	K06980
lcl|SIZZ01000001.1_prot_TBR39157.1_524
lcl|SIZZ01000001.1_prot_TBR39158.1_525	K00241
lcl|SIZZ01000001.1_prot_TBR39159.1_526	K00242
lcl|SIZZ01000001.1_prot_TBR39160.1_527	K00239
lcl|SIZZ01000001.1_prot_TBR39161.1_528	K00240
lcl|SIZZ01000001.1_prot_TBR39162.1_529
lcl|SIZZ01000001.1_prot_TBR39163.1_530
lcl|SIZZ01000001.1_prot_TBR39164.1_531	K09808
lcl|SIZZ01000001.1_prot_TBR39165.1_532	K09810
lcl|SIZZ01000001.1_prot_TBR39166.1_533	K02238
lcl|SIZZ01000001.1_prot_TBR40664.1_534	K03561
lcl|SIZZ01000001.1_prot_TBR39167.1_535	K03559
lcl|SIZZ01000001.1_prot_TBR39168.1_536	K11085
lcl|SIZZ01000001.1_prot_TBR39169.1_537	K00912
lcl|SIZZ01000001.1_prot_TBR39170.1_538
lcl|SIZZ01000001.1_prot_TBR39171.1_539
lcl|SIZZ01000001.1_prot_TBR40665.1_540	K12982
lcl|SIZZ01000001.1_prot_TBR39172.1_541	K11211
lcl|SIZZ01000001.1_prot_TBR39173.1_542
lcl|SIZZ01000001.1_prot_TBR39174.1_543	K02343
lcl|SIZZ01000001.1_prot_TBR39175.1_544	K09747
lcl|SIZZ01000001.1_prot_TBR39176.1_545	K06187
lcl|SIZZ01000001.1_prot_TBR39177.1_546
lcl|SIZZ01000001.1_prot_TBR39178.1_547	K02503
lcl|SIZZ01000001.1_prot_TBR39179.1_548	K07285
lcl|SIZZ01000001.1_prot_TBR39180.1_549	K22452
lcl|SIZZ01000001.1_prot_TBR39181.1_550
lcl|SIZZ01000001.1_prot_TBR39182.1_551	K03924
lcl|SIZZ01000001.1_prot_TBR39183.1_552
lcl|SIZZ01000001.1_prot_TBR39184.1_553
lcl|SIZZ01000001.1_prot_TBR39185.1_554	K25422
lcl|SIZZ01000001.1_prot_TBR39186.1_555
lcl|SIZZ01000001.1_prot_TBR40666.1_556
lcl|SIZZ01000001.1_prot_TBR39187.1_557	K02911
lcl|SIZZ01000001.1_prot_TBR39188.1_558	K00648
lcl|SIZZ01000001.1_prot_TBR39189.1_559	K00645
lcl|SIZZ01000001.1_prot_TBR39190.1_560	K00059
lcl|SIZZ01000001.1_prot_TBR39191.1_561	K02078
lcl|SIZZ01000001.1_prot_TBR39192.1_562	K09458
lcl|SIZZ01000001.1_prot_TBR39193.1_563	K01665
lcl|SIZZ01000001.1_prot_TBR39194.1_564	K02619
lcl|SIZZ01000001.1_prot_TBR39195.1_565	K07082
lcl|SIZZ01000001.1_prot_TBR39196.1_566	K00943
lcl|SIZZ01000001.1_prot_TBR39197.1_567	K02341
lcl|SIZZ01000001.1_prot_TBR39198.1_568
lcl|SIZZ01000001.1_prot_TBR39199.1_569
lcl|SIZZ01000001.1_prot_TBR39200.1_570	K02676
lcl|SIZZ01000001.1_prot_TBR40667.1_571	K00330
lcl|SIZZ01000001.1_prot_TBR39201.1_572	K00331
lcl|SIZZ01000001.1_prot_TBR39202.1_573	K00332
lcl|SIZZ01000001.1_prot_TBR39203.1_574	K00333
lcl|SIZZ01000001.1_prot_TBR39204.1_575	K00334
lcl|SIZZ01000001.1_prot_TBR39205.1_576	K00335
lcl|SIZZ01000001.1_prot_TBR39206.1_577	K00336
lcl|SIZZ01000001.1_prot_TBR39207.1_578	K00337
lcl|SIZZ01000001.1_prot_TBR39208.1_579	K00338
lcl|SIZZ01000001.1_prot_TBR39209.1_580	K00339
lcl|SIZZ01000001.1_prot_TBR39210.1_581	K00340
lcl|SIZZ01000001.1_prot_TBR39211.1_582	K00341
lcl|SIZZ01000001.1_prot_TBR39212.1_583	K00342
lcl|SIZZ01000001.1_prot_TBR40668.1_584	K00343
lcl|SIZZ01000001.1_prot_TBR39213.1_585	K09748
lcl|SIZZ01000001.1_prot_TBR39214.1_586	K02600
lcl|SIZZ01000001.1_prot_TBR39215.1_587	K02519
lcl|SIZZ01000001.1_prot_TBR39216.1_588	K02834
lcl|SIZZ01000001.1_prot_TBR39217.1_589	K03177
lcl|SIZZ01000001.1_prot_TBR39218.1_590	K02956
lcl|SIZZ01000001.1_prot_TBR39219.1_591	K00962
lcl|SIZZ01000001.1_prot_TBR39220.1_592	K22881
lcl|SIZZ01000001.1_prot_TBR39221.1_593	K03821
lcl|SIZZ01000001.1_prot_TBR39222.1_594
lcl|SIZZ01000001.1_prot_TBR39223.1_595	K08963
lcl|SIZZ01000001.1_prot_TBR39224.1_596
lcl|SIZZ01000001.1_prot_TBR39225.1_597	K02469
lcl|SIZZ01000001.1_prot_TBR39226.1_598	K24136
lcl|SIZZ01000001.1_prot_TBR39227.1_599	K13993
lcl|SIZZ01000001.1_prot_TBR39228.1_600	K05516
lcl|SIZZ01000001.1_prot_TBR39229.1_601	K02658
lcl|SIZZ01000001.1_prot_TBR39230.1_602	K19745
lcl|SIZZ01000001.1_prot_TBR39231.1_603
lcl|SIZZ01000001.1_prot_TBR39232.1_604	K00382
lcl|SIZZ01000001.1_prot_TBR39233.1_605	K00658
lcl|SIZZ01000001.1_prot_TBR39234.1_606	K00164
lcl|SIZZ01000001.1_prot_TBR39235.1_607
lcl|SIZZ01000001.1_prot_TBR39236.1_608	K18850
lcl|SIZZ01000001.1_prot_TBR39237.1_609	K00380
lcl|SIZZ01000001.1_prot_TBR39238.1_610	K00381
lcl|SIZZ01000001.1_prot_TBR39239.1_611	K00390
lcl|SIZZ01000001.1_prot_TBR39240.1_612	K00958
lcl|SIZZ01000001.1_prot_TBR39241.1_613	K13634
lcl|SIZZ01000001.1_prot_TBR39242.1_614	K02302
lcl|SIZZ01000001.1_prot_TBR39243.1_615	K01738
lcl|SIZZ01000001.1_prot_TBR39244.1_616	K01756
lcl|SIZZ01000001.1_prot_TBR39245.1_617	K01679
lcl|SIZZ01000001.1_prot_TBR39246.1_618
lcl|SIZZ01000001.1_prot_TBR39247.1_619
lcl|SIZZ01000001.1_prot_TBR39248.1_620
lcl|SIZZ01000001.1_prot_TBR39249.1_621
lcl|SIZZ01000001.1_prot_TBR39250.1_622	K01990
lcl|SIZZ01000001.1_prot_TBR39251.1_623	K07979
lcl|SIZZ01000001.1_prot_TBR39252.1_624
lcl|SIZZ01000001.1_prot_TBR39253.1_625
lcl|SIZZ01000001.1_prot_626
lcl|SIZZ01000001.1_prot_627
lcl|SIZZ01000001.1_prot_628
lcl|SIZZ01000001.1_prot_629
lcl|SIZZ01000001.1_prot_630
lcl|SIZZ01000001.1_prot_TBR40669.1_631
lcl|SIZZ01000001.1_prot_TBR39254.1_632
lcl|SIZZ01000001.1_prot_TBR39255.1_633	K06889
lcl|SIZZ01000001.1_prot_TBR39256.1_634
lcl|SIZZ01000001.1_prot_TBR39257.1_635
lcl|SIZZ01000001.1_prot_TBR40670.1_636	K01971
lcl|SIZZ01000001.1_prot_TBR40671.1_637
lcl|SIZZ01000001.1_prot_TBR39258.1_638
lcl|SIZZ01000001.1_prot_TBR39259.1_639	K03704
lcl|SIZZ01000001.1_prot_TBR39260.1_640
lcl|SIZZ01000001.1_prot_TBR39261.1_641	K14059
lcl|SIZZ01000001.1_prot_TBR39262.1_642
lcl|SIZZ01000001.1_prot_TBR39263.1_643
lcl|SIZZ01000001.1_prot_TBR39264.1_644
lcl|SIZZ01000001.1_prot_TBR39265.1_645
lcl|SIZZ01000001.1_prot_TBR40672.1_646
lcl|SIZZ01000001.1_prot_TBR39266.1_647
lcl|SIZZ01000001.1_prot_TBR39267.1_648
lcl|SIZZ01000001.1_prot_TBR39268.1_649
lcl|SIZZ01000001.1_prot_TBR39269.1_650
lcl|SIZZ01000001.1_prot_TBR39270.1_651
lcl|SIZZ01000001.1_prot_TBR39271.1_652
lcl|SIZZ01000001.1_prot_TBR39272.1_653
lcl|SIZZ01000001.1_prot_TBR39273.1_654
lcl|SIZZ01000001.1_prot_TBR39274.1_655
lcl|SIZZ01000001.1_prot_TBR40673.1_656
lcl|SIZZ01000001.1_prot_TBR39275.1_657
lcl|SIZZ01000001.1_prot_TBR39276.1_658
lcl|SIZZ01000001.1_prot_TBR39277.1_659
lcl|SIZZ01000001.1_prot_TBR39278.1_660	K03664
lcl|SIZZ01000001.1_prot_TBR39279.1_661
lcl|SIZZ01000001.1_prot_TBR39280.1_662	K09801
lcl|SIZZ01000001.1_prot_TBR39281.1_663	K06186
lcl|SIZZ01000001.1_prot_TBR39282.1_664	K03711
lcl|SIZZ01000001.1_prot_TBR40674.1_665	K07675
lcl|SIZZ01000001.1_prot_TBR39283.1_666	K07686
lcl|SIZZ01000001.1_prot_TBR39284.1_667	K03631
lcl|SIZZ01000001.1_prot_TBR39285.1_668	K03705
lcl|SIZZ01000001.1_prot_TBR39286.1_669	K03687
lcl|SIZZ01000001.1_prot_TBR39287.1_670	K04043
lcl|SIZZ01000001.1_prot_TBR39288.1_671
lcl|SIZZ01000001.1_prot_TBR39289.1_672	K03686
lcl|SIZZ01000001.1_prot_TBR39290.1_673	K00215
lcl|SIZZ01000001.1_prot_TBR39291.1_674	K00868
lcl|SIZZ01000001.1_prot_TBR39292.1_675
lcl|SIZZ01000001.1_prot_TBR40675.1_676
lcl|SIZZ01000001.1_prot_TBR39293.1_677
lcl|SIZZ01000001.1_prot_TBR39294.1_678	K01956
lcl|SIZZ01000001.1_prot_TBR39295.1_679	K01955
lcl|SIZZ01000001.1_prot_TBR39296.1_680	K03624
lcl|SIZZ01000001.1_prot_TBR39297.1_681	K02919
lcl|SIZZ01000001.1_prot_TBR39298.1_682
lcl|SIZZ01000001.1_prot_TBR39299.1_683
lcl|SIZZ01000001.1_prot_TBR39300.1_684	K00219
lcl|SIZZ01000001.1_prot_TBR39301.1_685	K08762
lcl|SIZZ01000001.1_prot_TBR39302.1_686	K00945
lcl|SIZZ01000001.1_prot_TBR39303.1_687	K02945
lcl|SIZZ01000001.1_prot_TBR39304.1_688	K05788
lcl|SIZZ01000001.1_prot_TBR39305.1_689
lcl|SIZZ01000001.1_prot_TBR39306.1_690	K19804
lcl|SIZZ01000001.1_prot_TBR39307.1_691	K13007
lcl|SIZZ01000001.1_prot_TBR39308.1_692	K24300
lcl|SIZZ01000001.1_prot_TBR39309.1_693	K00963
lcl|SIZZ01000001.1_prot_TBR39310.1_694	K06894
lcl|SIZZ01000001.1_prot_TBR39311.1_695	K05367
lcl|SIZZ01000001.1_prot_TBR39312.1_696	K09471
lcl|SIZZ01000001.1_prot_TBR39313.1_697	K06878
lcl|SIZZ01000001.1_prot_TBR40676.1_698	K17837
lcl|SIZZ01000001.1_prot_TBR39314.1_699
lcl|SIZZ01000001.1_prot_TBR39315.1_700	K09990
lcl|SIZZ01000001.1_prot_TBR39316.1_701	K00632
lcl|SIZZ01000001.1_prot_TBR39317.1_702	K07516
lcl|SIZZ01000001.1_prot_TBR39318.1_703
lcl|SIZZ01000001.1_prot_TBR39319.1_704	K00940
lcl|SIZZ01000001.1_prot_TBR39320.1_705	K06941
lcl|SIZZ01000001.1_prot_TBR39321.1_706	K02656
lcl|SIZZ01000001.1_prot_TBR39322.1_707
lcl|SIZZ01000001.1_prot_TBR39323.1_708
lcl|SIZZ01000001.1_prot_TBR39324.1_709	K17713
lcl|SIZZ01000001.1_prot_TBR39325.1_710	K03977
lcl|SIZZ01000001.1_prot_TBR39326.1_711	K21029
lcl|SIZZ01000001.1_prot_TBR39327.1_712	K03817
lcl|SIZZ01000001.1_prot_TBR39328.1_713	K01491
lcl|SIZZ01000001.1_prot_TBR39329.1_714	K00088
lcl|SIZZ01000001.1_prot_TBR39330.1_715	K01951
lcl|SIZZ01000001.1_prot_TBR39331.1_716	K11991
lcl|SIZZ01000001.1_prot_TBR39332.1_717
lcl|SIZZ01000001.1_prot_TBR39333.1_718	K12410
lcl|SIZZ01000001.1_prot_TBR40677.1_719	K07025
lcl|SIZZ01000001.1_prot_TBR39334.1_720
lcl|SIZZ01000001.1_prot_TBR39335.1_721	K07165
lcl|SIZZ01000001.1_prot_TBR39336.1_722
lcl|SIZZ01000001.1_prot_TBR39337.1_723
lcl|SIZZ01000001.1_prot_TBR39338.1_724
lcl|SIZZ01000001.1_prot_TBR39339.1_725
lcl|SIZZ01000001.1_prot_TBR39340.1_726
lcl|SIZZ01000001.1_prot_TBR39341.1_727	K00406
lcl|SIZZ01000001.1_prot_TBR39342.1_728
lcl|SIZZ01000001.1_prot_TBR39343.1_729	K00405
lcl|SIZZ01000001.1_prot_TBR39344.1_730	K00404
lcl|SIZZ01000001.1_prot_TBR39345.1_731
lcl|SIZZ01000001.1_prot_TBR39346.1_732
lcl|SIZZ01000001.1_prot_TBR39347.1_733
lcl|SIZZ01000001.1_prot_TBR39348.1_734
lcl|SIZZ01000001.1_prot_TBR39349.1_735	K00433
lcl|SIZZ01000001.1_prot_TBR39350.1_736
lcl|SIZZ01000001.1_prot_TBR40678.1_737	K20541
lcl|SIZZ01000001.1_prot_TBR40679.1_738	K20542
lcl|SIZZ01000001.1_prot_TBR39351.1_739	K20543
lcl|SIZZ01000001.1_prot_TBR39352.1_740
lcl|SIZZ01000001.1_prot_TBR39353.1_741
lcl|SIZZ01000001.1_prot_TBR39354.1_742
lcl|SIZZ01000001.1_prot_TBR39355.1_743	K00694
lcl|SIZZ01000001.1_prot_TBR39356.1_744
lcl|SIZZ01000001.1_prot_TBR39357.1_745
lcl|SIZZ01000001.1_prot_TBR39358.1_746	K21085
lcl|SIZZ01000001.1_prot_TBR39359.1_747
lcl|SIZZ01000001.1_prot_TBR39360.1_748	K02014
lcl|SIZZ01000001.1_prot_TBR39361.1_749
lcl|SIZZ01000001.1_prot_TBR39362.1_750	K03088
lcl|SIZZ01000001.1_prot_TBR39363.1_751
lcl|SIZZ01000001.1_prot_TBR39364.1_752
lcl|SIZZ01000001.1_prot_TBR39365.1_753	K01674
lcl|SIZZ01000001.1_prot_TBR39366.1_754
lcl|SIZZ01000001.1_prot_TBR39367.1_755
lcl|SIZZ01000001.1_prot_TBR39368.1_756	K03756
lcl|SIZZ01000001.1_prot_TBR39369.1_757	K10001
lcl|SIZZ01000001.1_prot_TBR39370.1_758
lcl|SIZZ01000001.1_prot_TBR39371.1_759	K01585
lcl|SIZZ01000001.1_prot_TBR39372.1_760	K01584
lcl|SIZZ01000001.1_prot_TBR39373.1_761	K03294
lcl|SIZZ01000001.1_prot_TBR39374.1_762	K01581
lcl|SIZZ01000001.1_prot_TBR39375.1_763
lcl|SIZZ01000001.1_prot_TBR39376.1_764	K04063
lcl|SIZZ01000001.1_prot_TBR39377.1_765
lcl|SIZZ01000001.1_prot_TBR39378.1_766
lcl|SIZZ01000001.1_prot_TBR39379.1_767
lcl|SIZZ01000001.1_prot_TBR39380.1_768
lcl|SIZZ01000001.1_prot_TBR39381.1_769
lcl|SIZZ01000001.1_prot_TBR39382.1_770
lcl|SIZZ01000001.1_prot_TBR39383.1_771	K04063
lcl|SIZZ01000001.1_prot_TBR39384.1_772	K00059
lcl|SIZZ01000001.1_prot_TBR39385.1_773
lcl|SIZZ01000001.1_prot_TBR39386.1_774
lcl|SIZZ01000001.1_prot_TBR39387.1_775
lcl|SIZZ01000001.1_prot_TBR39388.1_776
lcl|SIZZ01000001.1_prot_TBR39389.1_777
lcl|SIZZ01000001.1_prot_TBR39390.1_778
lcl|SIZZ01000001.1_prot_TBR39391.1_779
lcl|SIZZ01000001.1_prot_780
lcl|SIZZ01000001.1_prot_781
lcl|SIZZ01000001.1_prot_782
lcl|SIZZ01000001.1_prot_783
lcl|SIZZ01000001.1_prot_784
lcl|SIZZ01000001.1_prot_785
lcl|SIZZ01000001.1_prot_TBR40680.1_786	K07279
lcl|SIZZ01000001.1_prot_TBR39392.1_787
lcl|SIZZ01000001.1_prot_TBR39393.1_788
lcl|SIZZ01000001.1_prot_TBR39394.1_789
lcl|SIZZ01000001.1_prot_TBR39395.1_790
lcl|SIZZ01000001.1_prot_TBR39396.1_791
lcl|SIZZ01000001.1_prot_792
lcl|SIZZ01000001.1_prot_TBR39397.1_793
lcl|SIZZ01000001.1_prot_TBR39398.1_794
lcl|SIZZ01000001.1_prot_TBR39399.1_795
lcl|SIZZ01000001.1_prot_TBR39400.1_796
lcl|SIZZ01000001.1_prot_TBR39401.1_797
lcl|SIZZ01000001.1_prot_TBR39402.1_798	K07497
lcl|SIZZ01000001.1_prot_TBR39403.1_799
lcl|SIZZ01000001.1_prot_TBR39404.1_800
lcl|SIZZ01000001.1_prot_TBR39405.1_801
lcl|SIZZ01000001.1_prot_TBR39406.1_802
lcl|SIZZ01000001.1_prot_TBR39407.1_803
lcl|SIZZ01000001.1_prot_TBR39408.1_804
lcl|SIZZ01000001.1_prot_805	K07491
lcl|SIZZ01000001.1_prot_TBR39409.1_806
lcl|SIZZ01000001.1_prot_TBR39410.1_807
lcl|SIZZ01000001.1_prot_TBR39411.1_808
lcl|SIZZ01000001.1_prot_TBR39412.1_809	K07486
lcl|SIZZ01000001.1_prot_TBR39413.1_810	K01465
lcl|SIZZ01000001.1_prot_TBR39414.1_811	K00209
lcl|SIZZ01000001.1_prot_TBR39415.1_812	K07003
lcl|SIZZ01000001.1_prot_TBR39416.1_813
lcl|SIZZ01000001.1_prot_TBR39417.1_814
lcl|SIZZ01000001.1_prot_TBR39418.1_815	K03556
lcl|SIZZ01000001.1_prot_TBR39419.1_816
lcl|SIZZ01000001.1_prot_TBR39420.1_817	K00344
lcl|SIZZ01000001.1_prot_TBR39421.1_818	K03119
lcl|SIZZ01000001.1_prot_TBR39422.1_819
lcl|SIZZ01000001.1_prot_TBR40681.1_820	K23016
lcl|SIZZ01000001.1_prot_TBR39423.1_821	K07002
lcl|SIZZ01000001.1_prot_TBR39424.1_822
lcl|SIZZ01000001.1_prot_TBR39425.1_823	K00666
lcl|SIZZ01000001.1_prot_TBR39426.1_824
lcl|SIZZ01000001.1_prot_TBR39427.1_825	K00163
lcl|SIZZ01000001.1_prot_TBR39428.1_826	K09699
lcl|SIZZ01000001.1_prot_TBR39429.1_827
lcl|SIZZ01000001.1_prot_TBR39430.1_828
lcl|SIZZ01000001.1_prot_TBR40682.1_829
lcl|SIZZ01000001.1_prot_TBR40683.1_830
lcl|SIZZ01000001.1_prot_TBR39431.1_831
lcl|SIZZ01000001.1_prot_TBR39432.1_832
lcl|SIZZ01000001.1_prot_TBR39433.1_833
lcl|SIZZ01000001.1_prot_TBR39434.1_834
lcl|SIZZ01000001.1_prot_TBR39435.1_835
lcl|SIZZ01000001.1_prot_TBR39436.1_836
lcl|SIZZ01000001.1_prot_TBR39437.1_837
lcl|SIZZ01000001.1_prot_TBR39438.1_838
lcl|SIZZ01000001.1_prot_TBR39439.1_839
lcl|SIZZ01000001.1_prot_TBR40684.1_840	K00971
lcl|SIZZ01000001.1_prot_TBR39440.1_841	K00066
lcl|SIZZ01000001.1_prot_TBR40685.1_842	K19290
lcl|SIZZ01000001.1_prot_TBR39441.1_843	K19291
lcl|SIZZ01000001.1_prot_TBR39442.1_844	K19292
lcl|SIZZ01000001.1_prot_TBR39443.1_845	K16081
lcl|SIZZ01000001.1_prot_TBR40686.1_846	K01795
lcl|SIZZ01000001.1_prot_TBR39444.1_847	K19294
lcl|SIZZ01000001.1_prot_TBR39445.1_848	K19295
lcl|SIZZ01000001.1_prot_TBR39446.1_849	K19296
lcl|SIZZ01000001.1_prot_TBR39447.1_850	K19293
lcl|SIZZ01000001.1_prot_TBR40687.1_851	K01729
lcl|SIZZ01000001.1_prot_TBR39448.1_852
lcl|SIZZ01000001.1_prot_TBR39449.1_853	K08995
lcl|SIZZ01000001.1_prot_TBR39450.1_854
lcl|SIZZ01000001.1_prot_TBR39451.1_855
lcl|SIZZ01000001.1_prot_TBR39452.1_856	K14194
lcl|SIZZ01000001.1_prot_TBR39453.1_857
lcl|SIZZ01000001.1_prot_TBR39454.1_858
lcl|SIZZ01000001.1_prot_TBR39455.1_859
lcl|SIZZ01000001.1_prot_TBR39456.1_860
lcl|SIZZ01000001.1_prot_TBR39457.1_861
lcl|SIZZ01000001.1_prot_TBR40688.1_862
lcl|SIZZ01000001.1_prot_TBR39458.1_863
lcl|SIZZ01000001.1_prot_TBR39459.1_864
lcl|SIZZ01000001.1_prot_TBR39460.1_865	K04034
lcl|SIZZ01000001.1_prot_TBR39461.1_866
lcl|SIZZ01000001.1_prot_TBR39462.1_867
lcl|SIZZ01000001.1_prot_TBR39463.1_868
lcl|SIZZ01000001.1_prot_TBR39464.1_869	K04034
lcl|SIZZ01000001.1_prot_TBR39465.1_870
lcl|SIZZ01000001.1_prot_TBR39466.1_871
lcl|SIZZ01000001.1_prot_TBR39467.1_872
lcl|SIZZ01000001.1_prot_TBR39468.1_873
lcl|SIZZ01000001.1_prot_TBR40689.1_874
lcl|SIZZ01000001.1_prot_TBR39469.1_875	K12988
lcl|SIZZ01000001.1_prot_TBR39470.1_876	K16693
lcl|SIZZ01000001.1_prot_TBR39471.1_877	K13017
lcl|SIZZ01000001.1_prot_TBR39472.1_878
lcl|SIZZ01000001.1_prot_TBR39473.1_879
lcl|SIZZ01000001.1_prot_TBR39474.1_880
lcl|SIZZ01000001.1_prot_TBR39475.1_881
lcl|SIZZ01000001.1_prot_TBR39476.1_882
lcl|SIZZ01000001.1_prot_TBR39477.1_883
lcl|SIZZ01000001.1_prot_TBR40690.1_884	K08738
lcl|SIZZ01000001.1_prot_TBR39478.1_885
lcl|SIZZ01000001.1_prot_TBR39479.1_886	K03088
lcl|SIZZ01000001.1_prot_TBR39480.1_887
lcl|SIZZ01000001.1_prot_TBR39481.1_888	K01342
lcl|SIZZ01000001.1_prot_TBR39482.1_889
lcl|SIZZ01000001.1_prot_TBR39483.1_890
lcl|SIZZ01000001.1_prot_TBR39484.1_891	K09924
lcl|SIZZ01000001.1_prot_TBR39485.1_892
lcl|SIZZ01000001.1_prot_TBR39486.1_893	K06134
lcl|SIZZ01000001.1_prot_TBR39487.1_894
lcl|SIZZ01000001.1_prot_TBR39488.1_895
lcl|SIZZ01000001.1_prot_TBR39489.1_896	K00059
lcl|SIZZ01000001.1_prot_TBR39490.1_897	K13953
lcl|SIZZ01000001.1_prot_TBR39491.1_898
lcl|SIZZ01000001.1_prot_TBR39492.1_899
lcl|SIZZ01000001.1_prot_TBR39493.1_900
lcl|SIZZ01000001.1_prot_TBR39494.1_901
lcl|SIZZ01000001.1_prot_TBR39495.1_902
lcl|SIZZ01000001.1_prot_TBR39496.1_903
lcl|SIZZ01000001.1_prot_TBR40691.1_904	K06714
lcl|SIZZ01000001.1_prot_TBR39497.1_905
lcl|SIZZ01000001.1_prot_TBR39498.1_906	K01971
lcl|SIZZ01000001.1_prot_TBR39499.1_907	K10979
lcl|SIZZ01000001.1_prot_TBR39500.1_908
lcl|SIZZ01000001.1_prot_TBR40692.1_909
lcl|SIZZ01000001.1_prot_TBR39501.1_910
lcl|SIZZ01000001.1_prot_TBR39502.1_911
lcl|SIZZ01000001.1_prot_TBR39503.1_912
lcl|SIZZ01000001.1_prot_TBR39504.1_913	K07124
lcl|SIZZ01000001.1_prot_TBR39505.1_914
lcl|SIZZ01000001.1_prot_TBR39506.1_915
lcl|SIZZ01000001.1_prot_TBR40693.1_916
lcl|SIZZ01000001.1_prot_TBR39507.1_917
lcl|SIZZ01000001.1_prot_TBR39508.1_918
lcl|SIZZ01000001.1_prot_TBR39509.1_919	K02045
lcl|SIZZ01000001.1_prot_TBR39510.1_920	K02047
lcl|SIZZ01000001.1_prot_TBR39511.1_921	K02046
lcl|SIZZ01000001.1_prot_TBR39512.1_922	K23163
lcl|SIZZ01000001.1_prot_TBR39513.1_923
lcl|SIZZ01000001.1_prot_TBR39514.1_924
lcl|SIZZ01000001.1_prot_TBR39515.1_925	K14979
lcl|SIZZ01000001.1_prot_TBR39516.1_926	K07777
lcl|SIZZ01000001.1_prot_TBR39517.1_927	K07001
lcl|SIZZ01000001.1_prot_TBR40694.1_928
lcl|SIZZ01000001.1_prot_TBR39518.1_929
lcl|SIZZ01000001.1_prot_TBR39519.1_930
lcl|SIZZ01000001.1_prot_TBR39520.1_931
lcl|SIZZ01000001.1_prot_TBR39521.1_932
lcl|SIZZ01000001.1_prot_TBR39522.1_933
lcl|SIZZ01000001.1_prot_TBR39523.1_934
lcl|SIZZ01000001.1_prot_TBR39524.1_935
lcl|SIZZ01000001.1_prot_TBR40695.1_936
lcl|SIZZ01000001.1_prot_TBR39525.1_937
lcl|SIZZ01000001.1_prot_TBR39526.1_938
lcl|SIZZ01000001.1_prot_TBR39527.1_939
lcl|SIZZ01000001.1_prot_TBR39528.1_940	K21449
lcl|SIZZ01000001.1_prot_TBR39529.1_941
lcl|SIZZ01000001.1_prot_TBR39530.1_942
lcl|SIZZ01000001.1_prot_TBR39531.1_943	K03528
lcl|SIZZ01000001.1_prot_TBR39532.1_944	K03529
lcl|SIZZ01000001.1_prot_TBR39533.1_945	K22066
lcl|SIZZ01000001.1_prot_TBR39534.1_946	K09780
lcl|SIZZ01000001.1_prot_TBR39535.1_947	K04567
lcl|SIZZ01000001.1_prot_TBR39536.1_948	K02836
lcl|SIZZ01000001.1_prot_TBR39537.1_949	K01953
lcl|SIZZ01000001.1_prot_TBR39538.1_950
lcl|SIZZ01000001.1_prot_TBR39539.1_951
lcl|SIZZ01000001.1_prot_TBR40696.1_952	K01993
lcl|SIZZ01000001.1_prot_TBR39540.1_953	K01992
lcl|SIZZ01000001.1_prot_TBR39541.1_954	K01992
lcl|SIZZ01000001.1_prot_TBR39542.1_955
lcl|SIZZ01000001.1_prot_TBR39543.1_956
lcl|SIZZ01000001.1_prot_TBR39544.1_957	K07462
lcl|SIZZ01000001.1_prot_TBR39545.1_958
lcl|SIZZ01000001.1_prot_TBR39546.1_959	K06158
lcl|SIZZ01000001.1_prot_TBR39547.1_960
lcl|SIZZ01000001.1_prot_TBR39548.1_961	K10536
lcl|SIZZ01000001.1_prot_TBR39549.1_962	K12251
lcl|SIZZ01000001.1_prot_TBR40697.1_963
lcl|SIZZ01000001.1_prot_TBR39550.1_964	K01183
lcl|SIZZ01000001.1_prot_TBR39551.1_965
lcl|SIZZ01000001.1_prot_TBR39552.1_966
lcl|SIZZ01000001.1_prot_TBR39553.1_967	K07400
lcl|SIZZ01000001.1_prot_TBR39554.1_968	K01724
lcl|SIZZ01000001.1_prot_TBR39555.1_969
lcl|SIZZ01000001.1_prot_TBR39556.1_970	K06179
lcl|SIZZ01000001.1_prot_TBR39557.1_971	K08300
lcl|SIZZ01000001.1_prot_TBR39558.1_972	K07689
lcl|SIZZ01000001.1_prot_TBR39559.1_973
lcl|SIZZ01000001.1_prot_TBR39560.1_974	K00995
lcl|SIZZ01000001.1_prot_TBR39561.1_975	K03703
lcl|SIZZ01000001.1_prot_TBR39562.1_976	K25307
lcl|SIZZ01000001.1_prot_TBR39563.1_977	K00979
lcl|SIZZ01000001.1_prot_TBR39564.1_978	K00800
lcl|SIZZ01000001.1_prot_TBR39565.1_979	K14170
lcl|SIZZ01000001.1_prot_TBR39566.1_980	K00831
lcl|SIZZ01000001.1_prot_TBR39567.1_981
lcl|SIZZ01000001.1_prot_TBR39568.1_982
lcl|SIZZ01000001.1_prot_TBR39569.1_983	K02518
lcl|SIZZ01000001.1_prot_TBR39570.1_984	K03694
lcl|SIZZ01000001.1_prot_TBR39571.1_985	K06891
lcl|SIZZ01000001.1_prot_TBR39572.1_986
lcl|SIZZ01000001.1_prot_TBR39573.1_987	K00566
lcl|SIZZ01000001.1_prot_TBR40698.1_988	K07153
lcl|SIZZ01000001.1_prot_TBR39574.1_989
lcl|SIZZ01000001.1_prot_TBR40699.1_990	K01682
lcl|SIZZ01000001.1_prot_TBR39575.1_991	K01681
lcl|SIZZ01000001.1_prot_TBR39576.1_992
lcl|SIZZ01000001.1_prot_TBR39577.1_993	K01897
lcl|SIZZ01000001.1_prot_TBR39578.1_994
lcl|SIZZ01000001.1_prot_TBR39579.1_995	K02346
lcl|SIZZ01000001.1_prot_TBR39580.1_996	K05896
lcl|SIZZ01000001.1_prot_TBR39581.1_997	K06024
lcl|SIZZ01000001.1_prot_TBR39582.1_998	K06178
lcl|SIZZ01000001.1_prot_TBR39583.1_999	K00537
lcl|SIZZ01000001.1_prot_TBR39584.1_1000	K13566
lcl|SIZZ01000001.1_prot_TBR39585.1_1001	K14287
lcl|SIZZ01000001.1_prot_TBR39586.1_1002
lcl|SIZZ01000001.1_prot_TBR39587.1_1003	K01118
lcl|SIZZ01000001.1_prot_TBR39588.1_1004
lcl|SIZZ01000001.1_prot_1005
lcl|SIZZ01000001.1_prot_TBR40700.1_1006
lcl|SIZZ01000001.1_prot_TBR39589.1_1007
lcl|SIZZ01000001.1_prot_TBR40701.1_1008
lcl|SIZZ01000001.1_prot_TBR39590.1_1009
lcl|SIZZ01000001.1_prot_TBR39591.1_1010
lcl|SIZZ01000001.1_prot_TBR39592.1_1011	K07347
lcl|SIZZ01000001.1_prot_TBR39593.1_1012	K07346
lcl|SIZZ01000001.1_prot_TBR40702.1_1013
lcl|SIZZ01000001.1_prot_TBR39594.1_1014
lcl|SIZZ01000001.1_prot_TBR39595.1_1015
lcl|SIZZ01000001.1_prot_TBR39596.1_1016
lcl|SIZZ01000001.1_prot_TBR39597.1_1017
lcl|SIZZ01000001.1_prot_TBR39598.1_1018	K03075
lcl|SIZZ01000001.1_prot_TBR39599.1_1019	K01803
lcl|SIZZ01000001.1_prot_TBR39600.1_1020	K07124
lcl|SIZZ01000001.1_prot_TBR39601.1_1021
lcl|SIZZ01000001.1_prot_TBR39602.1_1022	K03431
lcl|SIZZ01000001.1_prot_TBR39603.1_1023	K00796
lcl|SIZZ01000001.1_prot_TBR39604.1_1024	K13288
lcl|SIZZ01000001.1_prot_TBR39605.1_1025	K01141
lcl|SIZZ01000001.1_prot_TBR39606.1_1026
lcl|SIZZ01000001.1_prot_TBR39607.1_1027
lcl|SIZZ01000001.1_prot_TBR40703.1_1028	K06188
lcl|SIZZ01000001.1_prot_TBR39608.1_1029	K08234
lcl|SIZZ01000001.1_prot_TBR40704.1_1030	K04568
lcl|SIZZ01000001.1_prot_TBR39609.1_1031	K01972
lcl|SIZZ01000001.1_prot_TBR39610.1_1032	K06140
lcl|SIZZ01000001.1_prot_TBR39611.1_1033
lcl|SIZZ01000001.1_prot_TBR39612.1_1034
lcl|SIZZ01000001.1_prot_TBR39613.1_1035
lcl|SIZZ01000001.1_prot_TBR39614.1_1036
lcl|SIZZ01000001.1_prot_TBR39615.1_1037	K01669
lcl|SIZZ01000001.1_prot_TBR39616.1_1038
lcl|SIZZ01000001.1_prot_TBR39617.1_1039
lcl|SIZZ01000001.1_prot_TBR39618.1_1040
lcl|SIZZ01000001.1_prot_TBR40705.1_1041
lcl|SIZZ01000001.1_prot_TBR39619.1_1042
lcl|SIZZ01000001.1_prot_TBR39620.1_1043
lcl|SIZZ01000001.1_prot_TBR39621.1_1044
lcl|SIZZ01000001.1_prot_TBR39622.1_1045	K01875
lcl|SIZZ01000001.1_prot_TBR39623.1_1046
lcl|SIZZ01000001.1_prot_TBR39624.1_1047
lcl|SIZZ01000001.1_prot_TBR39625.1_1048	K07478
lcl|SIZZ01000001.1_prot_TBR39626.1_1049	K03634
lcl|SIZZ01000001.1_prot_TBR39627.1_1050	K03466
lcl|SIZZ01000001.1_prot_TBR39628.1_1051	K00259
lcl|SIZZ01000001.1_prot_TBR39629.1_1052	K00384
lcl|SIZZ01000001.1_prot_TBR39630.1_1053	K07396
lcl|SIZZ01000001.1_prot_TBR39631.1_1054	K09919
lcl|SIZZ01000001.1_prot_TBR39632.1_1055	K00684
lcl|SIZZ01000001.1_prot_TBR39633.1_1056
lcl|SIZZ01000001.1_prot_TBR39634.1_1057
lcl|SIZZ01000001.1_prot_TBR39635.1_1058
lcl|SIZZ01000001.1_prot_TBR39636.1_1059
lcl|SIZZ01000001.1_prot_TBR39637.1_1060	K03526
lcl|SIZZ01000001.1_prot_TBR39638.1_1061	K01420
lcl|SIZZ01000001.1_prot_TBR39639.1_1062	K00404
lcl|SIZZ01000001.1_prot_TBR39640.1_1063	K00405
lcl|SIZZ01000001.1_prot_TBR39641.1_1064
lcl|SIZZ01000001.1_prot_TBR39642.1_1065	K00406
lcl|SIZZ01000001.1_prot_TBR39643.1_1066
lcl|SIZZ01000001.1_prot_TBR39644.1_1067	K01533
lcl|SIZZ01000001.1_prot_TBR39645.1_1068
lcl|SIZZ01000001.1_prot_TBR39646.1_1069	K09792
lcl|SIZZ01000001.1_prot_TBR39647.1_1070
lcl|SIZZ01000001.1_prot_TBR39648.1_1071	K06147
lcl|SIZZ01000001.1_prot_TBR39649.1_1072	K06201
lcl|SIZZ01000001.1_prot_TBR39650.1_1073	K01444
lcl|SIZZ01000001.1_prot_TBR39651.1_1074	K03704
lcl|SIZZ01000001.1_prot_TBR39652.1_1075	K00772
lcl|SIZZ01000001.1_prot_TBR39653.1_1076	K19784
lcl|SIZZ01000001.1_prot_TBR39654.1_1077	K00760
lcl|SIZZ01000001.1_prot_TBR39655.1_1078	K01207
lcl|SIZZ01000001.1_prot_TBR39656.1_1079
lcl|SIZZ01000001.1_prot_TBR39657.1_1080	K03215
lcl|SIZZ01000001.1_prot_TBR39658.1_1081
lcl|SIZZ01000001.1_prot_TBR39659.1_1082
lcl|SIZZ01000001.1_prot_TBR39660.1_1083
lcl|SIZZ01000001.1_prot_TBR39661.1_1084	K03584
lcl|SIZZ01000001.1_prot_TBR40706.1_1085	K03595
lcl|SIZZ01000001.1_prot_TBR39662.1_1086	K03685
lcl|SIZZ01000001.1_prot_TBR39663.1_1087
lcl|SIZZ01000001.1_prot_TBR39664.1_1088	K03100
lcl|SIZZ01000001.1_prot_TBR39665.1_1089	K03596
lcl|SIZZ01000001.1_prot_TBR39666.1_1090	K04771
lcl|SIZZ01000001.1_prot_TBR39667.1_1091	K03597
lcl|SIZZ01000001.1_prot_TBR39668.1_1092	K03088
lcl|SIZZ01000001.1_prot_TBR39669.1_1093
lcl|SIZZ01000001.1_prot_TBR39670.1_1094
lcl|SIZZ01000001.1_prot_TBR39671.1_1095	K01782
lcl|SIZZ01000001.1_prot_TBR39672.1_1096
lcl|SIZZ01000001.1_prot_TBR39673.1_1097
lcl|SIZZ01000001.1_prot_TBR39674.1_1098	K00012
lcl|SIZZ01000001.1_prot_TBR39675.1_1099	K03772
lcl|SIZZ01000001.1_prot_TBR39676.1_1100	K03455
lcl|SIZZ01000001.1_prot_TBR39677.1_1101
lcl|SIZZ01000001.1_prot_TBR39678.1_1102	K09773
lcl|SIZZ01000001.1_prot_TBR39679.1_1103	K01007
lcl|SIZZ01000001.1_prot_TBR39680.1_1104	K03100
lcl|SIZZ01000001.1_prot_TBR39681.1_1105
lcl|SIZZ01000001.1_prot_TBR39682.1_1106	K20074
lcl|SIZZ01000001.1_prot_TBR39683.1_1107	K02342
lcl|SIZZ01000001.1_prot_TBR40707.1_1108	K03469
lcl|SIZZ01000001.1_prot_TBR39684.1_1109
lcl|SIZZ01000001.1_prot_TBR39685.1_1110	K01069
lcl|SIZZ01000001.1_prot_TBR40708.1_1111	K08307
lcl|SIZZ01000001.1_prot_TBR39686.1_1112	K00208
lcl|SIZZ01000001.1_prot_TBR39687.1_1113	K03770
lcl|SIZZ01000001.1_prot_TBR39688.1_1114	K03530
lcl|SIZZ01000001.1_prot_TBR39689.1_1115	K01338
lcl|SIZZ01000001.1_prot_TBR39690.1_1116	K03544
lcl|SIZZ01000001.1_prot_TBR39691.1_1117	K01358
lcl|SIZZ01000001.1_prot_TBR39692.1_1118	K03545
lcl|SIZZ01000001.1_prot_TBR39693.1_1119
lcl|SIZZ01000001.1_prot_TBR39694.1_1120	K03684
lcl|SIZZ01000001.1_prot_TBR39695.1_1121
lcl|SIZZ01000001.1_prot_TBR40709.1_1122	K16088
lcl|SIZZ01000001.1_prot_TBR39696.1_1123
lcl|SIZZ01000001.1_prot_TBR39697.1_1124
lcl|SIZZ01000001.1_prot_TBR39698.1_1125
lcl|SIZZ01000001.1_prot_TBR39699.1_1126
lcl|SIZZ01000001.1_prot_TBR39700.1_1127
lcl|SIZZ01000001.1_prot_TBR39701.1_1128
lcl|SIZZ01000001.1_prot_TBR39702.1_1129	K00117
lcl|SIZZ01000001.1_prot_TBR39703.1_1130
lcl|SIZZ01000001.1_prot_TBR39704.1_1131	K14085
lcl|SIZZ01000001.1_prot_TBR39705.1_1132
lcl|SIZZ01000001.1_prot_TBR39706.1_1133
lcl|SIZZ01000001.1_prot_TBR39707.1_1134	K00254
lcl|SIZZ01000001.1_prot_TBR40710.1_1135	K00075
lcl|SIZZ01000001.1_prot_TBR39708.1_1136	K07461
lcl|SIZZ01000001.1_prot_TBR39709.1_1137	K08223
lcl|SIZZ01000001.1_prot_TBR39710.1_1138
lcl|SIZZ01000001.1_prot_TBR39711.1_1139	K00937
lcl|SIZZ01000001.1_prot_TBR39712.1_1140	K19784
lcl|SIZZ01000001.1_prot_TBR39713.1_1141
lcl|SIZZ01000001.1_prot_TBR39714.1_1142
lcl|SIZZ01000001.1_prot_TBR39715.1_1143
lcl|SIZZ01000001.1_prot_TBR39716.1_1144
lcl|SIZZ01000001.1_prot_TBR39717.1_1145	K00252
lcl|SIZZ01000001.1_prot_TBR39718.1_1146
lcl|SIZZ01000001.1_prot_TBR39719.1_1147
lcl|SIZZ01000001.1_prot_TBR39720.1_1148	K01081
lcl|SIZZ01000001.1_prot_TBR39721.1_1149	K00858
lcl|SIZZ01000001.1_prot_TBR39722.1_1150	K15371
lcl|SIZZ01000001.1_prot_TBR39723.1_1151	K03585
lcl|SIZZ01000001.1_prot_TBR39724.1_1152	K03296
lcl|SIZZ01000001.1_prot_TBR39725.1_1153	K11444
lcl|SIZZ01000001.1_prot_TBR39726.1_1154	K00248
lcl|SIZZ01000001.1_prot_TBR39727.1_1155
lcl|SIZZ01000001.1_prot_TBR39728.1_1156	K24042
lcl|SIZZ01000001.1_prot_TBR40711.1_1157	K00548
lcl|SIZZ01000001.1_prot_TBR39729.1_1158
lcl|SIZZ01000001.1_prot_TBR40712.1_1159	K15378
lcl|SIZZ01000001.1_prot_TBR39730.1_1160
lcl|SIZZ01000001.1_prot_TBR39731.1_1161	K00153
lcl|SIZZ01000001.1_prot_TBR39732.1_1162	K03930
lcl|SIZZ01000001.1_prot_TBR39733.1_1163
lcl|SIZZ01000001.1_prot_TBR39734.1_1164
lcl|SIZZ01000001.1_prot_TBR39735.1_1165	K07017
lcl|SIZZ01000001.1_prot_TBR39736.1_1166	K01187
lcl|SIZZ01000001.1_prot_TBR39737.1_1167
lcl|SIZZ01000001.1_prot_TBR40713.1_1168	K01217
lcl|SIZZ01000001.1_prot_TBR39738.1_1169	K02529
lcl|SIZZ01000001.1_prot_TBR39739.1_1170
lcl|SIZZ01000001.1_prot_TBR39740.1_1171	K07666
lcl|SIZZ01000001.1_prot_TBR39741.1_1172	K07645
lcl|SIZZ01000001.1_prot_TBR39742.1_1173
lcl|SIZZ01000001.1_prot_TBR39743.1_1174
lcl|SIZZ01000001.1_prot_TBR39744.1_1175
lcl|SIZZ01000001.1_prot_TBR39745.1_1176	K07264
lcl|SIZZ01000001.1_prot_TBR39746.1_1177
lcl|SIZZ01000001.1_prot_TBR39747.1_1178	K06901
lcl|SIZZ01000001.1_prot_TBR39748.1_1179
lcl|SIZZ01000001.1_prot_TBR39749.1_1180	K03583
lcl|SIZZ01000001.1_prot_TBR40714.1_1181	K03582
lcl|SIZZ01000001.1_prot_TBR39750.1_1182	K03581
lcl|SIZZ01000001.1_prot_TBR39751.1_1183
lcl|SIZZ01000001.1_prot_TBR39752.1_1184
lcl|SIZZ01000001.1_prot_TBR39753.1_1185	K02655
lcl|SIZZ01000001.1_prot_TBR39754.1_1186	K02674
lcl|SIZZ01000001.1_prot_TBR39755.1_1187
lcl|SIZZ01000001.1_prot_TBR39756.1_1188
lcl|SIZZ01000001.1_prot_TBR39757.1_1189
lcl|SIZZ01000001.1_prot_TBR40715.1_1190	K18893
lcl|SIZZ01000001.1_prot_TBR39758.1_1191	K05982
lcl|SIZZ01000001.1_prot_TBR39759.1_1192	K05802
lcl|SIZZ01000001.1_prot_TBR39760.1_1193
lcl|SIZZ01000001.1_prot_TBR39761.1_1194	K13652
lcl|SIZZ01000001.1_prot_TBR39762.1_1195	K06978
lcl|SIZZ01000001.1_prot_TBR39763.1_1196
lcl|SIZZ01000001.1_prot_TBR39764.1_1197
lcl|SIZZ01000001.1_prot_TBR39765.1_1198
lcl|SIZZ01000001.1_prot_TBR39766.1_1199	K19302
lcl|SIZZ01000001.1_prot_TBR39767.1_1200
lcl|SIZZ01000001.1_prot_TBR39768.1_1201
lcl|SIZZ01000001.1_prot_TBR39769.1_1202
lcl|SIZZ01000001.1_prot_TBR39770.1_1203
lcl|SIZZ01000001.1_prot_TBR39771.1_1204
lcl|SIZZ01000001.1_prot_TBR39772.1_1205
lcl|SIZZ01000001.1_prot_TBR39773.1_1206
lcl|SIZZ01000001.1_prot_TBR40716.1_1207
lcl|SIZZ01000001.1_prot_TBR39774.1_1208
lcl|SIZZ01000001.1_prot_TBR39775.1_1209
lcl|SIZZ01000001.1_prot_TBR39776.1_1210	K06193
lcl|SIZZ01000001.1_prot_TBR39777.1_1211
lcl|SIZZ01000001.1_prot_TBR39778.1_1212
lcl|SIZZ01000001.1_prot_TBR39779.1_1213
lcl|SIZZ01000001.1_prot_TBR39780.1_1214	K13653
lcl|SIZZ01000001.1_prot_TBR39781.1_1215
lcl|SIZZ01000001.1_prot_TBR39782.1_1216	K01848
lcl|SIZZ01000001.1_prot_TBR39783.1_1217
lcl|SIZZ01000001.1_prot_TBR39784.1_1218
lcl|SIZZ01000001.1_prot_TBR39785.1_1219
lcl|SIZZ01000001.1_prot_TBR39786.1_1220
lcl|SIZZ01000001.1_prot_TBR39787.1_1221
lcl|SIZZ01000001.1_prot_TBR40717.1_1222
lcl|SIZZ01000001.1_prot_TBR39788.1_1223
lcl|SIZZ01000001.1_prot_TBR39789.1_1224	K23010
lcl|SIZZ01000001.1_prot_TBR39790.1_1225
lcl|SIZZ01000001.1_prot_TBR39791.1_1226	K00263
lcl|SIZZ01000001.1_prot_TBR39792.1_1227	K10816
lcl|SIZZ01000001.1_prot_TBR39793.1_1228	K10815
lcl|SIZZ01000001.1_prot_TBR39794.1_1229	K10814
lcl|SIZZ01000001.1_prot_TBR40718.1_1230	K02078
lcl|SIZZ01000001.1_prot_TBR39795.1_1231
lcl|SIZZ01000001.1_prot_TBR39796.1_1232
lcl|SIZZ01000001.1_prot_TBR40719.1_1233
lcl|SIZZ01000001.1_prot_TBR39797.1_1234	K09458
lcl|SIZZ01000001.1_prot_TBR39798.1_1235	K00647
lcl|SIZZ01000001.1_prot_TBR39799.1_1236
lcl|SIZZ01000001.1_prot_TBR40720.1_1237
lcl|SIZZ01000001.1_prot_TBR39800.1_1238	K02078
lcl|SIZZ01000001.1_prot_TBR39801.1_1239
lcl|SIZZ01000001.1_prot_TBR40721.1_1240
lcl|SIZZ01000001.1_prot_TBR39802.1_1241
lcl|SIZZ01000001.1_prot_TBR39803.1_1242	K07107
lcl|SIZZ01000001.1_prot_TBR39804.1_1243	K05929
lcl|SIZZ01000001.1_prot_TBR39805.1_1244
lcl|SIZZ01000001.1_prot_TBR39806.1_1245
lcl|SIZZ01000001.1_prot_TBR39807.1_1246	K00059
lcl|SIZZ01000001.1_prot_TBR39808.1_1247
lcl|SIZZ01000001.1_prot_TBR39809.1_1248
lcl|SIZZ01000001.1_prot_TBR39810.1_1249	K00253
lcl|SIZZ01000001.1_prot_TBR39811.1_1250	K12688
lcl|SIZZ01000001.1_prot_TBR39812.1_1251	K00626
lcl|SIZZ01000001.1_prot_TBR39813.1_1252
lcl|SIZZ01000001.1_prot_TBR39814.1_1253	K01969
lcl|SIZZ01000001.1_prot_1254
lcl|SIZZ01000001.1_prot_TBR39815.1_1255	K04045
lcl|SIZZ01000001.1_prot_TBR39816.1_1256
lcl|SIZZ01000001.1_prot_TBR39817.1_1257
lcl|SIZZ01000001.1_prot_TBR39818.1_1258	K04759
lcl|SIZZ01000001.1_prot_TBR39819.1_1259
lcl|SIZZ01000001.1_prot_TBR39820.1_1260	K13766
lcl|SIZZ01000001.1_prot_TBR39821.1_1261
lcl|SIZZ01000001.1_prot_TBR39822.1_1262	K01968
lcl|SIZZ01000001.1_prot_TBR39823.1_1263	K01640
lcl|SIZZ01000001.1_prot_TBR39824.1_1264	K06207
lcl|SIZZ01000001.1_prot_TBR39825.1_1265
lcl|SIZZ01000001.1_prot_TBR39826.1_1266
lcl|SIZZ01000001.1_prot_TBR39827.1_1267
lcl|SIZZ01000001.1_prot_TBR39828.1_1268
lcl|SIZZ01000001.1_prot_TBR39829.1_1269
lcl|SIZZ01000001.1_prot_TBR39830.1_1270	K00882
lcl|SIZZ01000001.1_prot_TBR39831.1_1271
lcl|SIZZ01000001.1_prot_TBR39832.1_1272	K02082
lcl|SIZZ01000001.1_prot_TBR39833.1_1273	K11645
lcl|SIZZ01000001.1_prot_TBR39834.1_1274
lcl|SIZZ01000001.1_prot_TBR39835.1_1275	K03436
lcl|SIZZ01000001.1_prot_TBR39836.1_1276
lcl|SIZZ01000001.1_prot_TBR39837.1_1277
lcl|SIZZ01000001.1_prot_TBR39838.1_1278
lcl|SIZZ01000001.1_prot_TBR39839.1_1279
lcl|SIZZ01000001.1_prot_TBR39840.1_1280
lcl|SIZZ01000001.1_prot_TBR39841.1_1281
lcl|SIZZ01000001.1_prot_TBR39842.1_1282
lcl|SIZZ01000001.1_prot_TBR39843.1_1283	K10947
lcl|SIZZ01000001.1_prot_TBR39844.1_1284
lcl|SIZZ01000001.1_prot_TBR39845.1_1285	K03168
lcl|SIZZ01000001.1_prot_TBR39846.1_1286	K07506
lcl|SIZZ01000001.1_prot_TBR39847.1_1287	K01563
lcl|SIZZ01000001.1_prot_TBR39848.1_1288
lcl|SIZZ01000001.1_prot_TBR39849.1_1289
lcl|SIZZ01000001.1_prot_TBR39850.1_1290
lcl|SIZZ01000001.1_prot_TBR39851.1_1291
lcl|SIZZ01000001.1_prot_TBR39852.1_1292	K07290
lcl|SIZZ01000001.1_prot_TBR39853.1_1293
lcl|SIZZ01000001.1_prot_TBR39854.1_1294	K07229
lcl|SIZZ01000001.1_prot_TBR39855.1_1295	K03298
lcl|SIZZ01000001.1_prot_TBR39856.1_1296
lcl|SIZZ01000001.1_prot_TBR39857.1_1297	K07118
lcl|SIZZ01000001.1_prot_TBR39858.1_1298	K07233
lcl|SIZZ01000001.1_prot_TBR39859.1_1299
lcl|SIZZ01000001.1_prot_TBR39860.1_1300	K07115
lcl|SIZZ01000001.1_prot_TBR39861.1_1301	K06178
lcl|SIZZ01000001.1_prot_TBR39862.1_1302	K03286
lcl|SIZZ01000001.1_prot_TBR39863.1_1303	K03286
lcl|SIZZ01000001.1_prot_TBR39864.1_1304	K01720
lcl|SIZZ01000001.1_prot_TBR39865.1_1305	K09788
lcl|SIZZ01000001.1_prot_TBR39866.1_1306	K20455
lcl|SIZZ01000001.1_prot_TBR39867.1_1307
lcl|SIZZ01000001.1_prot_TBR39868.1_1308	K00799
lcl|SIZZ01000001.1_prot_TBR40722.1_1309
lcl|SIZZ01000001.1_prot_TBR39869.1_1310
lcl|SIZZ01000001.1_prot_TBR39870.1_1311	K06992
lcl|SIZZ01000001.1_prot_TBR40723.1_1312
lcl|SIZZ01000001.1_prot_TBR39871.1_1313
lcl|SIZZ01000001.1_prot_TBR39872.1_1314	K01659
lcl|SIZZ01000001.1_prot_TBR39873.1_1315	K03417
lcl|SIZZ01000001.1_prot_TBR39874.1_1316	K05617
lcl|SIZZ01000001.1_prot_TBR39875.1_1317	K24119
lcl|SIZZ01000001.1_prot_TBR39876.1_1318	K03387
lcl|SIZZ01000001.1_prot_TBR39877.1_1319	K01908
lcl|SIZZ01000001.1_prot_TBR39878.1_1320	K00024
lcl|SIZZ01000001.1_prot_TBR39879.1_1321	K00812
lcl|SIZZ01000001.1_prot_TBR39880.1_1322
lcl|SIZZ01000001.1_prot_TBR39881.1_1323
lcl|SIZZ01000001.1_prot_TBR39882.1_1324	K12733
lcl|SIZZ01000001.1_prot_TBR39883.1_1325
lcl|SIZZ01000001.1_prot_TBR40724.1_1326
lcl|SIZZ01000001.1_prot_TBR39884.1_1327
lcl|SIZZ01000001.1_prot_TBR39885.1_1328
lcl|SIZZ01000001.1_prot_TBR39886.1_1329
lcl|SIZZ01000001.1_prot_TBR39887.1_1330
lcl|SIZZ01000001.1_prot_TBR39888.1_1331	K02014
lcl|SIZZ01000001.1_prot_TBR39889.1_1332
lcl|SIZZ01000001.1_prot_TBR39890.1_1333
lcl|SIZZ01000001.1_prot_TBR39891.1_1334	K03828
lcl|SIZZ01000001.1_prot_TBR39892.1_1335
lcl|SIZZ01000001.1_prot_TBR39893.1_1336	K03829
lcl|SIZZ01000001.1_prot_TBR39894.1_1337	K24217
lcl|SIZZ01000001.1_prot_TBR39895.1_1338	K08683
lcl|SIZZ01000001.1_prot_TBR39896.1_1339	K02356
lcl|SIZZ01000001.1_prot_TBR39897.1_1340
lcl|SIZZ01000001.1_prot_TBR39898.1_1341	K16137
lcl|SIZZ01000001.1_prot_TBR39899.1_1342
lcl|SIZZ01000001.1_prot_TBR39900.1_1343
lcl|SIZZ01000001.1_prot_TBR39901.1_1344	K03392
lcl|SIZZ01000001.1_prot_TBR39902.1_1345
lcl|SIZZ01000001.1_prot_TBR39903.1_1346	K01556
lcl|SIZZ01000001.1_prot_TBR39904.1_1347
lcl|SIZZ01000001.1_prot_TBR39905.1_1348	K01755
lcl|SIZZ01000001.1_prot_TBR39906.1_1349	K00145
lcl|SIZZ01000001.1_prot_TBR39907.1_1350	K12659
lcl|SIZZ01000001.1_prot_TBR39908.1_1351	K01438
lcl|SIZZ01000001.1_prot_TBR39909.1_1352
lcl|SIZZ01000001.1_prot_TBR39910.1_1353	K01940
lcl|SIZZ01000001.1_prot_TBR39911.1_1354
lcl|SIZZ01000001.1_prot_TBR39912.1_1355	K07734
lcl|SIZZ01000001.1_prot_TBR39913.1_1356	K00611
lcl|SIZZ01000001.1_prot_TBR39914.1_1357
lcl|SIZZ01000001.1_prot_TBR39915.1_1358	K01883
lcl|SIZZ01000001.1_prot_TBR39916.1_1359	K02426
lcl|SIZZ01000001.1_prot_TBR40725.1_1360	K06204
lcl|SIZZ01000001.1_prot_TBR39917.1_1361	K08998
lcl|SIZZ01000001.1_prot_TBR39918.1_1362	K01465
lcl|SIZZ01000001.1_prot_TBR39919.1_1363
lcl|SIZZ01000001.1_prot_TBR39920.1_1364	K09007
lcl|SIZZ01000001.1_prot_TBR39921.1_1365
lcl|SIZZ01000001.1_prot_TBR39922.1_1366	K22292
lcl|SIZZ01000001.1_prot_TBR40726.1_1367	K00568
lcl|SIZZ01000001.1_prot_TBR39923.1_1368
lcl|SIZZ01000001.1_prot_TBR39924.1_1369	K12960
lcl|SIZZ01000001.1_prot_TBR39925.1_1370	K02356
lcl|SIZZ01000001.1_prot_TBR39926.1_1371	K19810
lcl|SIZZ01000001.1_prot_TBR40727.1_1372	K21025
lcl|SIZZ01000001.1_prot_TBR39927.1_1373	K02884
lcl|SIZZ01000001.1_prot_TBR39928.1_1374	K00554
lcl|SIZZ01000001.1_prot_TBR39929.1_1375	K02860
lcl|SIZZ01000001.1_prot_TBR39930.1_1376	K02959
lcl|SIZZ01000001.1_prot_TBR39931.1_1377	K03106
lcl|SIZZ01000001.1_prot_TBR39932.1_1378
lcl|SIZZ01000001.1_prot_TBR39933.1_1379
lcl|SIZZ01000001.1_prot_TBR39934.1_1380	K04485
lcl|SIZZ01000001.1_prot_TBR39935.1_1381	K01775
lcl|SIZZ01000001.1_prot_TBR39936.1_1382	K02314
lcl|SIZZ01000001.1_prot_TBR39937.1_1383	K02939
lcl|SIZZ01000001.1_prot_TBR39938.1_1384	K02963
lcl|SIZZ01000001.1_prot_TBR39939.1_1385	K02990
lcl|SIZZ01000001.1_prot_TBR39940.1_1386	K13628
lcl|SIZZ01000001.1_prot_TBR39941.1_1387	K01893
lcl|SIZZ01000001.1_prot_TBR39942.1_1388
lcl|SIZZ01000001.1_prot_TBR39943.1_1389
lcl|SIZZ01000001.1_prot_TBR39944.1_1390	K00059
lcl|SIZZ01000001.1_prot_TBR40728.1_1391	K23234
lcl|SIZZ01000001.1_prot_TBR39945.1_1392	K01673
lcl|SIZZ01000001.1_prot_TBR39946.1_1393
lcl|SIZZ01000001.1_prot_TBR39947.1_1394
lcl|SIZZ01000001.1_prot_TBR39948.1_1395	K01458
lcl|SIZZ01000001.1_prot_TBR39949.1_1396	K00383
lcl|SIZZ01000001.1_prot_TBR39950.1_1397	K00285
lcl|SIZZ01000001.1_prot_TBR39951.1_1398
lcl|SIZZ01000001.1_prot_TBR39952.1_1399
lcl|SIZZ01000001.1_prot_TBR39953.1_1400
lcl|SIZZ01000001.1_prot_TBR39954.1_1401	K23775
lcl|SIZZ01000001.1_prot_TBR39955.1_1402	K04063
lcl|SIZZ01000001.1_prot_TBR39956.1_1403
lcl|SIZZ01000001.1_prot_TBR39957.1_1404	K08178
lcl|SIZZ01000001.1_prot_TBR39958.1_1405
lcl|SIZZ01000001.1_prot_TBR39959.1_1406	K11927
lcl|SIZZ01000001.1_prot_TBR39960.1_1407
lcl|SIZZ01000001.1_prot_TBR39961.1_1408	K03790
lcl|SIZZ01000001.1_prot_TBR39962.1_1409	K01070
lcl|SIZZ01000001.1_prot_TBR39963.1_1410	K16066
lcl|SIZZ01000001.1_prot_TBR39964.1_1411	K05592
lcl|SIZZ01000001.1_prot_TBR39965.1_1412	K15777
lcl|SIZZ01000001.1_prot_TBR39966.1_1413	K06940
lcl|SIZZ01000001.1_prot_TBR39967.1_1414	K07054
lcl|SIZZ01000001.1_prot_TBR39968.1_1415	K00799
lcl|SIZZ01000001.1_prot_TBR39969.1_1416
lcl|SIZZ01000001.1_prot_TBR39970.1_1417
lcl|SIZZ01000001.1_prot_TBR39971.1_1418
lcl|SIZZ01000001.1_prot_TBR39972.1_1419	K06287
lcl|SIZZ01000001.1_prot_TBR39973.1_1420	K18118
lcl|SIZZ01000001.1_prot_TBR39974.1_1421
lcl|SIZZ01000001.1_prot_TBR39975.1_1422	K00783
lcl|SIZZ01000001.1_prot_TBR39976.1_1423	K09710
lcl|SIZZ01000001.1_prot_TBR39977.1_1424	K00459
lcl|SIZZ01000001.1_prot_TBR39978.1_1425
lcl|SIZZ01000001.1_prot_TBR39979.1_1426
lcl|SIZZ01000001.1_prot_TBR40729.1_1427	K03088
lcl|SIZZ01000001.1_prot_TBR39980.1_1428
lcl|SIZZ01000001.1_prot_TBR39981.1_1429	K07305
lcl|SIZZ01000001.1_prot_TBR39982.1_1430	K00969
lcl|SIZZ01000001.1_prot_TBR39983.1_1431	K02340
lcl|SIZZ01000001.1_prot_TBR39984.1_1432
lcl|SIZZ01000001.1_prot_TBR39985.1_1433	K01869
lcl|SIZZ01000001.1_prot_TBR39986.1_1434
lcl|SIZZ01000001.1_prot_TBR39987.1_1435	K06192
lcl|SIZZ01000001.1_prot_TBR39988.1_1436	K03808
lcl|SIZZ01000001.1_prot_TBR39989.1_1437
lcl|SIZZ01000001.1_prot_TBR39990.1_1438	K05838
lcl|SIZZ01000001.1_prot_TBR39991.1_1439
lcl|SIZZ01000001.1_prot_TBR39992.1_1440
lcl|SIZZ01000001.1_prot_TBR39993.1_1441	K03088
lcl|SIZZ01000001.1_prot_TBR39994.1_1442
lcl|SIZZ01000001.1_prot_TBR39995.1_1443
lcl|SIZZ01000001.1_prot_TBR40730.1_1444
lcl|SIZZ01000001.1_prot_TBR40731.1_1445	K06518
lcl|SIZZ01000001.1_prot_TBR39996.1_1446
lcl|SIZZ01000001.1_prot_TBR39997.1_1447	K07386
lcl|SIZZ01000001.1_prot_1448
lcl|SIZZ01000001.1_prot_TBR39998.1_1449	K00077
lcl|SIZZ01000001.1_prot_TBR39999.1_1450	K16090
lcl|SIZZ01000001.1_prot_TBR40000.1_1451	K07336
lcl|SIZZ01000001.1_prot_TBR40001.1_1452	K07126
lcl|SIZZ01000001.1_prot_TBR40002.1_1453
lcl|SIZZ01000001.1_prot_TBR40003.1_1454
lcl|SIZZ01000001.1_prot_TBR40004.1_1455
lcl|SIZZ01000001.1_prot_TBR40005.1_1456
lcl|SIZZ01000001.1_prot_TBR40006.1_1457
lcl|SIZZ01000001.1_prot_TBR40007.1_1458
lcl|SIZZ01000001.1_prot_TBR40732.1_1459	K08085
lcl|SIZZ01000001.1_prot_TBR40008.1_1460	K03580
lcl|SIZZ01000001.1_prot_TBR40009.1_1461	K03293
lcl|SIZZ01000001.1_prot_TBR40010.1_1462	K09650
lcl|SIZZ01000001.1_prot_TBR40011.1_1463
lcl|SIZZ01000001.1_prot_TBR40012.1_1464
lcl|SIZZ01000001.1_prot_TBR40013.1_1465
lcl|SIZZ01000001.1_prot_TBR40014.1_1466	K23242
lcl|SIZZ01000001.1_prot_TBR40015.1_1467	K09771
lcl|SIZZ01000001.1_prot_TBR40016.1_1468
lcl|SIZZ01000001.1_prot_TBR40017.1_1469	K00799
lcl|SIZZ01000001.1_prot_TBR40018.1_1470
lcl|SIZZ01000001.1_prot_TBR40019.1_1471	K02495
lcl|SIZZ01000001.1_prot_TBR40020.1_1472	K19303
lcl|SIZZ01000001.1_prot_TBR40733.1_1473	K06997
lcl|SIZZ01000001.1_prot_TBR40021.1_1474
lcl|SIZZ01000001.1_prot_TBR40022.1_1475	K02237
lcl|SIZZ01000001.1_prot_TBR40023.1_1476
lcl|SIZZ01000001.1_prot_TBR40024.1_1477
lcl|SIZZ01000001.1_prot_TBR40025.1_1478
lcl|SIZZ01000001.1_prot_TBR40026.1_1479
lcl|SIZZ01000001.1_prot_TBR40027.1_1480
lcl|SIZZ01000001.1_prot_TBR40028.1_1481	K00380
lcl|SIZZ01000001.1_prot_TBR40029.1_1482	K03734
lcl|SIZZ01000001.1_prot_TBR40030.1_1483
lcl|SIZZ01000001.1_prot_TBR40031.1_1484
lcl|SIZZ01000001.1_prot_TBR40032.1_1485
lcl|SIZZ01000001.1_prot_TBR40033.1_1486	K07774
lcl|SIZZ01000001.1_prot_TBR40034.1_1487	K07649
lcl|SIZZ01000001.1_prot_TBR40035.1_1488	K00823
lcl|SIZZ01000001.1_prot_TBR40734.1_1489	K08966
lcl|SIZZ01000001.1_prot_TBR40036.1_1490
lcl|SIZZ01000001.1_prot_TBR40037.1_1491	K25169
lcl|SIZZ01000001.1_prot_TBR40038.1_1492	K02003
lcl|SIZZ01000001.1_prot_TBR40039.1_1493
lcl|SIZZ01000001.1_prot_TBR40040.1_1494
lcl|SIZZ01000001.1_prot_TBR40041.1_1495	K05710
lcl|SIZZ01000001.1_prot_TBR40042.1_1496
lcl|SIZZ01000001.1_prot_TBR40043.1_1497	K08635
lcl|SIZZ01000001.1_prot_TBR40044.1_1498
lcl|SIZZ01000001.1_prot_TBR40045.1_1499	K11717
lcl|SIZZ01000001.1_prot_TBR40046.1_1500	K09015
lcl|SIZZ01000001.1_prot_TBR40047.1_1501	K09013
lcl|SIZZ01000001.1_prot_TBR40048.1_1502	K09014
lcl|SIZZ01000001.1_prot_TBR40049.1_1503	K13772
lcl|SIZZ01000001.1_prot_TBR40050.1_1504	K04751
lcl|SIZZ01000001.1_prot_TBR40735.1_1505	K03320
lcl|SIZZ01000001.1_prot_TBR40051.1_1506	K15726
lcl|SIZZ01000001.1_prot_TBR40736.1_1507	K15727
lcl|SIZZ01000001.1_prot_TBR40737.1_1508
lcl|SIZZ01000001.1_prot_TBR40052.1_1509
lcl|SIZZ01000001.1_prot_TBR40053.1_1510	K13015
lcl|SIZZ01000001.1_prot_TBR40054.1_1511	K07102
lcl|SIZZ01000001.1_prot_TBR40055.1_1512	K00992
lcl|SIZZ01000001.1_prot_TBR40056.1_1513
lcl|SIZZ01000001.1_prot_TBR40057.1_1514
lcl|SIZZ01000001.1_prot_TBR40058.1_1515	K03074
lcl|SIZZ01000001.1_prot_TBR40059.1_1516	K03072
lcl|SIZZ01000001.1_prot_TBR40738.1_1517	K03210
lcl|SIZZ01000001.1_prot_TBR40060.1_1518	K00773
lcl|SIZZ01000001.1_prot_TBR40061.1_1519	K07568
lcl|SIZZ01000001.1_prot_TBR40062.1_1520
lcl|SIZZ01000001.1_prot_TBR40063.1_1521
lcl|SIZZ01000001.1_prot_TBR40064.1_1522	K07693
lcl|SIZZ01000001.1_prot_TBR40065.1_1523	K07778
lcl|SIZZ01000001.1_prot_TBR40066.1_1524	K07778
lcl|SIZZ01000001.1_prot_TBR40739.1_1525	K01992
lcl|SIZZ01000001.1_prot_TBR40067.1_1526	K01990
lcl|SIZZ01000001.1_prot_TBR40068.1_1527
lcl|SIZZ01000001.1_prot_TBR40069.1_1528
lcl|SIZZ01000001.1_prot_TBR40070.1_1529	K00761
lcl|SIZZ01000001.1_prot_TBR40071.1_1530
lcl|SIZZ01000001.1_prot_TBR40072.1_1531	K01259
lcl|SIZZ01000001.1_prot_TBR40073.1_1532
lcl|SIZZ01000001.1_prot_TBR40074.1_1533	K00058
lcl|SIZZ01000001.1_prot_TBR40075.1_1534	K03406
lcl|SIZZ01000001.1_prot_TBR40076.1_1535	K13486
lcl|SIZZ01000001.1_prot_TBR40077.1_1536	K03411
lcl|SIZZ01000001.1_prot_TBR40078.1_1537
lcl|SIZZ01000001.1_prot_TBR40740.1_1538
lcl|SIZZ01000001.1_prot_TBR40079.1_1539
lcl|SIZZ01000001.1_prot_TBR40080.1_1540
lcl|SIZZ01000001.1_prot_TBR40081.1_1541
lcl|SIZZ01000001.1_prot_TBR40082.1_1542
lcl|SIZZ01000001.1_prot_TBR40083.1_1543	K04764
lcl|SIZZ01000001.1_prot_TBR40084.1_1544	K01890
lcl|SIZZ01000001.1_prot_TBR40085.1_1545	K01889
lcl|SIZZ01000001.1_prot_TBR40086.1_1546	K02887
lcl|SIZZ01000001.1_prot_TBR40087.1_1547	K02916
lcl|SIZZ01000001.1_prot_TBR40088.1_1548	K02520
lcl|SIZZ01000001.1_prot_TBR40089.1_1549	K01868
lcl|SIZZ01000001.1_prot_TBR40090.1_1550	K08679
lcl|SIZZ01000001.1_prot_TBR40091.1_1551	K08973
lcl|SIZZ01000001.1_prot_TBR40092.1_1552
lcl|SIZZ01000001.1_prot_TBR40741.1_1553
lcl|SIZZ01000001.1_prot_TBR40093.1_1554
lcl|SIZZ01000001.1_prot_TBR40094.1_1555
lcl|SIZZ01000001.1_prot_1556
lcl|SIZZ01000001.1_prot_TBR40095.1_1557	K03702
lcl|SIZZ01000001.1_prot_TBR40096.1_1558
lcl|SIZZ01000001.1_prot_TBR40742.1_1559
lcl|SIZZ01000001.1_prot_TBR40097.1_1560
lcl|SIZZ01000001.1_prot_TBR40098.1_1561
lcl|SIZZ01000001.1_prot_TBR40099.1_1562
lcl|SIZZ01000001.1_prot_TBR40100.1_1563	K02488
lcl|SIZZ01000001.1_prot_TBR40101.1_1564
lcl|SIZZ01000001.1_prot_TBR40102.1_1565
lcl|SIZZ01000001.1_prot_TBR40743.1_1566
lcl|SIZZ01000001.1_prot_TBR40103.1_1567
lcl|SIZZ01000001.1_prot_TBR40104.1_1568
lcl|SIZZ01000001.1_prot_TBR40105.1_1569
lcl|SIZZ01000001.1_prot_TBR40106.1_1570	K06966
lcl|SIZZ01000001.1_prot_TBR40107.1_1571
lcl|SIZZ01000001.1_prot_TBR40108.1_1572
lcl|SIZZ01000001.1_prot_TBR40744.1_1573
lcl|SIZZ01000001.1_prot_TBR40109.1_1574
lcl|SIZZ01000001.1_prot_TBR40110.1_1575	K07390
lcl|SIZZ01000001.1_prot_TBR40111.1_1576	K04564
lcl|SIZZ01000001.1_prot_TBR40112.1_1577	K01589
lcl|SIZZ01000001.1_prot_TBR40113.1_1578	K01588
lcl|SIZZ01000001.1_prot_TBR40114.1_1579
lcl|SIZZ01000001.1_prot_TBR40115.1_1580
lcl|SIZZ01000001.1_prot_TBR40116.1_1581	K00767
lcl|SIZZ01000001.1_prot_TBR40117.1_1582
lcl|SIZZ01000001.1_prot_TBR40745.1_1583	K03600
lcl|SIZZ01000001.1_prot_TBR40118.1_1584	K03599
lcl|SIZZ01000001.1_prot_TBR40746.1_1585	K00413
lcl|SIZZ01000001.1_prot_TBR40119.1_1586	K00412
lcl|SIZZ01000001.1_prot_TBR40120.1_1587	K00411
lcl|SIZZ01000001.1_prot_TBR40121.1_1588	K04691
lcl|SIZZ01000001.1_prot_TBR40122.1_1589
lcl|SIZZ01000001.1_prot_TBR40123.1_1590	K06168
lcl|SIZZ01000001.1_prot_TBR40124.1_1591	K25181
lcl|SIZZ01000001.1_prot_TBR40747.1_1592	K01990
lcl|SIZZ01000001.1_prot_TBR40125.1_1593	K01993
lcl|SIZZ01000001.1_prot_TBR40126.1_1594
lcl|SIZZ01000001.1_prot_TBR40127.1_1595	K06217
lcl|SIZZ01000001.1_prot_TBR40128.1_1596	K07042
lcl|SIZZ01000001.1_prot_TBR40129.1_1597	K06189
lcl|SIZZ01000001.1_prot_TBR40130.1_1598
lcl|SIZZ01000001.1_prot_TBR40131.1_1599	K03284
lcl|SIZZ01000001.1_prot_TBR40132.1_1600
lcl|SIZZ01000001.1_prot_TBR40133.1_1601	K03305
lcl|SIZZ01000001.1_prot_TBR40134.1_1602
lcl|SIZZ01000001.1_prot_TBR40135.1_1603	K02650
lcl|SIZZ01000001.1_prot_TBR40136.1_1604
lcl|SIZZ01000001.1_prot_TBR40137.1_1605	K23424
lcl|SIZZ01000001.1_prot_TBR40748.1_1606
lcl|SIZZ01000001.1_prot_TBR40138.1_1607	K19429
lcl|SIZZ01000001.1_prot_TBR40139.1_1608
lcl|SIZZ01000001.1_prot_TBR40140.1_1609
lcl|SIZZ01000001.1_prot_TBR40141.1_1610	K16695
lcl|SIZZ01000001.1_prot_TBR40142.1_1611
lcl|SIZZ01000001.1_prot_TBR40143.1_1612
lcl|SIZZ01000001.1_prot_TBR40144.1_1613	K01854
lcl|SIZZ01000001.1_prot_TBR40145.1_1614
lcl|SIZZ01000001.1_prot_TBR40146.1_1615
lcl|SIZZ01000001.1_prot_TBR40147.1_1616	K13668
lcl|SIZZ01000001.1_prot_TBR40148.1_1617	K23684
lcl|SIZZ01000001.1_prot_TBR40149.1_1618	K02652
lcl|SIZZ01000001.1_prot_TBR40150.1_1619	K02653
lcl|SIZZ01000001.1_prot_TBR40151.1_1620	K02654
lcl|SIZZ01000001.1_prot_TBR40152.1_1621	K00859
lcl|SIZZ01000001.1_prot_TBR40749.1_1622	K03574
lcl|SIZZ01000001.1_prot_TBR40153.1_1623	K00287
lcl|SIZZ01000001.1_prot_TBR40154.1_1624	K00560
lcl|SIZZ01000001.1_prot_TBR40155.1_1625	K13292
lcl|SIZZ01000001.1_prot_TBR40156.1_1626
lcl|SIZZ01000001.1_prot_TBR40157.1_1627
lcl|SIZZ01000001.1_prot_TBR40158.1_1628
lcl|SIZZ01000001.1_prot_TBR40159.1_1629	K06872
lcl|SIZZ01000001.1_prot_TBR40160.1_1630	K03744
lcl|SIZZ01000001.1_prot_TBR40161.1_1631	K00901
lcl|SIZZ01000001.1_prot_TBR40162.1_1632	K03305
lcl|SIZZ01000001.1_prot_TBR40750.1_1633	K15011
lcl|SIZZ01000001.1_prot_TBR40163.1_1634	K15012
lcl|SIZZ01000001.1_prot_TBR40751.1_1635
lcl|SIZZ01000001.1_prot_TBR40164.1_1636
lcl|SIZZ01000001.1_prot_TBR40165.1_1637
lcl|SIZZ01000001.1_prot_TBR40752.1_1638	K13051
lcl|SIZZ01000001.1_prot_TBR40166.1_1639
lcl|SIZZ01000001.1_prot_TBR40167.1_1640	K02171
lcl|SIZZ01000001.1_prot_TBR40168.1_1641	K01027
lcl|SIZZ01000001.1_prot_TBR40169.1_1642
lcl|SIZZ01000001.1_prot_TBR40170.1_1643	K02483
lcl|SIZZ01000001.1_prot_TBR40171.1_1644	K10804
lcl|SIZZ01000001.1_prot_TBR40172.1_1645	K02003
lcl|SIZZ01000001.1_prot_TBR40173.1_1646	K02004
lcl|SIZZ01000001.1_prot_TBR40174.1_1647
lcl|SIZZ01000001.1_prot_TBR40175.1_1648
lcl|SIZZ01000001.1_prot_TBR40176.1_1649
lcl|SIZZ01000001.1_prot_TBR40177.1_1650	K04765
lcl|SIZZ01000001.1_prot_TBR40178.1_1651	K01082
lcl|SIZZ01000001.1_prot_TBR40179.1_1652	K08312
lcl|SIZZ01000001.1_prot_TBR40180.1_1653	K05602
lcl|SIZZ01000001.1_prot_TBR40181.1_1654
lcl|SIZZ01000001.1_prot_TBR40182.1_1655	K00833
lcl|SIZZ01000001.1_prot_TBR40183.1_1656
lcl|SIZZ01000001.1_prot_TBR40184.1_1657	K09761
lcl|SIZZ01000001.1_prot_TBR40185.1_1658	K06598
lcl|SIZZ01000001.1_prot_TBR40186.1_1659	K06597
lcl|SIZZ01000001.1_prot_TBR40187.1_1660	K06596
lcl|SIZZ01000001.1_prot_TBR40188.1_1661	K02660
lcl|SIZZ01000001.1_prot_TBR40753.1_1662	K02659
lcl|SIZZ01000001.1_prot_TBR40189.1_1663	K02658
lcl|SIZZ01000001.1_prot_TBR40754.1_1664	K02657
lcl|SIZZ01000001.1_prot_TBR40190.1_1665	K01920
lcl|SIZZ01000001.1_prot_TBR40191.1_1666	K03832
lcl|SIZZ01000001.1_prot_TBR40192.1_1667
lcl|SIZZ01000001.1_prot_TBR40193.1_1668	K07735
lcl|SIZZ01000001.1_prot_TBR40194.1_1669	K07447
lcl|SIZZ01000001.1_prot_TBR40195.1_1670	K00609
lcl|SIZZ01000001.1_prot_TBR40196.1_1671
lcl|SIZZ01000001.1_prot_TBR40197.1_1672
lcl|SIZZ01000001.1_prot_TBR40198.1_1673	K04065
lcl|SIZZ01000001.1_prot_TBR40199.1_1674	K02670
lcl|SIZZ01000001.1_prot_TBR40200.1_1675	K02669
lcl|SIZZ01000001.1_prot_TBR40201.1_1676	K00286
lcl|SIZZ01000001.1_prot_TBR40202.1_1677	K02221
lcl|SIZZ01000001.1_prot_TBR40203.1_1678	K06858
lcl|SIZZ01000001.1_prot_TBR40204.1_1679
lcl|SIZZ01000001.1_prot_TBR40755.1_1680	K00275
lcl|SIZZ01000001.1_prot_TBR40205.1_1681	K15918
lcl|SIZZ01000001.1_prot_TBR40206.1_1682
lcl|SIZZ01000001.1_prot_TBR40207.1_1683
lcl|SIZZ01000001.1_prot_TBR40208.1_1684	K00891
lcl|SIZZ01000001.1_prot_TBR40209.1_1685	K01735
lcl|SIZZ01000001.1_prot_TBR40210.1_1686
lcl|SIZZ01000001.1_prot_TBR40211.1_1687	K01599
lcl|SIZZ01000001.1_prot_TBR40212.1_1688
lcl|SIZZ01000001.1_prot_TBR40213.1_1689
lcl|SIZZ01000001.1_prot_TBR40214.1_1690	K01873
lcl|SIZZ01000001.1_prot_TBR40215.1_1691
lcl|SIZZ01000001.1_prot_TBR40216.1_1692	K03789
lcl|SIZZ01000001.1_prot_TBR40217.1_1693
lcl|SIZZ01000001.1_prot_TBR40218.1_1694	K17103
lcl|SIZZ01000001.1_prot_TBR40219.1_1695
lcl|SIZZ01000001.1_prot_TBR40220.1_1696	K01881
lcl|SIZZ01000001.1_prot_TBR40221.1_1697
lcl|SIZZ01000001.1_prot_TBR40222.1_1698
lcl|SIZZ01000001.1_prot_TBR40756.1_1699	K07340
lcl|SIZZ01000001.1_prot_TBR40223.1_1700
lcl|SIZZ01000001.1_prot_TBR40224.1_1701	K13598
lcl|SIZZ01000001.1_prot_TBR40225.1_1702
lcl|SIZZ01000001.1_prot_TBR40226.1_1703	K11384
lcl|SIZZ01000001.1_prot_TBR40227.1_1704
lcl|SIZZ01000001.1_prot_TBR40228.1_1705
lcl|SIZZ01000001.1_prot_TBR40229.1_1706
lcl|SIZZ01000001.1_prot_TBR40230.1_1707	K24948
lcl|SIZZ01000001.1_prot_TBR40231.1_1708	K02004
lcl|SIZZ01000001.1_prot_TBR40232.1_1709	K24948
lcl|SIZZ01000001.1_prot_TBR40757.1_1710
lcl|SIZZ01000001.1_prot_TBR40233.1_1711	K24948
lcl|SIZZ01000001.1_prot_TBR40234.1_1712
lcl|SIZZ01000001.1_prot_TBR40235.1_1713	K02003
lcl|SIZZ01000001.1_prot_TBR40236.1_1714
lcl|SIZZ01000001.1_prot_TBR40237.1_1715
lcl|SIZZ01000001.1_prot_TBR40238.1_1716
lcl|SIZZ01000001.1_prot_TBR40239.1_1717
lcl|SIZZ01000001.1_prot_TBR40240.1_1718	K04883
lcl|SIZZ01000001.1_prot_TBR40241.1_1719
lcl|SIZZ01000001.1_prot_TBR40242.1_1720
lcl|SIZZ01000001.1_prot_TBR40243.1_1721
lcl|SIZZ01000001.1_prot_TBR40244.1_1722
lcl|SIZZ01000001.1_prot_TBR40245.1_1723
lcl|SIZZ01000001.1_prot_TBR40246.1_1724	K01095
lcl|SIZZ01000001.1_prot_TBR40247.1_1725	K00946
lcl|SIZZ01000001.1_prot_TBR40758.1_1726
lcl|SIZZ01000001.1_prot_TBR40759.1_1727
lcl|SIZZ01000001.1_prot_TBR40248.1_1728	K03625
lcl|SIZZ01000001.1_prot_TBR40249.1_1729	K00794
lcl|SIZZ01000001.1_prot_TBR40250.1_1730	K01297
lcl|SIZZ01000001.1_prot_TBR40251.1_1731	K14652
lcl|SIZZ01000001.1_prot_TBR40252.1_1732	K00793
lcl|SIZZ01000001.1_prot_TBR40253.1_1733	K00078
lcl|SIZZ01000001.1_prot_TBR40254.1_1734
lcl|SIZZ01000001.1_prot_TBR40760.1_1735	K11752
lcl|SIZZ01000001.1_prot_TBR40255.1_1736	K07738
lcl|SIZZ01000001.1_prot_TBR40256.1_1737
lcl|SIZZ01000001.1_prot_TBR40257.1_1738	K00600
lcl|SIZZ01000001.1_prot_TBR40761.1_1739
lcl|SIZZ01000001.1_prot_TBR40258.1_1740
lcl|SIZZ01000001.1_prot_TBR40259.1_1741
lcl|SIZZ01000001.1_prot_TBR40260.1_1742	K06020
lcl|SIZZ01000001.1_prot_TBR40261.1_1743	K01591
lcl|SIZZ01000001.1_prot_TBR40262.1_1744
lcl|SIZZ01000001.1_prot_TBR40263.1_1745
lcl|SIZZ01000001.1_prot_TBR40264.1_1746
lcl|SIZZ01000001.1_prot_TBR40265.1_1747	K10914
lcl|SIZZ01000001.1_prot_TBR40266.1_1748
lcl|SIZZ01000001.1_prot_TBR40762.1_1749
lcl|SIZZ01000001.1_prot_TBR40267.1_1750
lcl|SIZZ01000001.1_prot_TBR40268.1_1751
lcl|SIZZ01000001.1_prot_1752
lcl|SIZZ01000001.1_prot_TBR40269.1_1753
lcl|SIZZ01000001.1_prot_TBR40270.1_1754
lcl|SIZZ01000001.1_prot_TBR40271.1_1755
lcl|SIZZ01000001.1_prot_TBR40272.1_1756	K14205
lcl|SIZZ01000001.1_prot_TBR40273.1_1757
lcl|SIZZ01000001.1_prot_TBR40274.1_1758	K01462
lcl|SIZZ01000001.1_prot_TBR40275.1_1759	K06200
lcl|SIZZ01000001.1_prot_TBR40276.1_1760
lcl|SIZZ01000001.1_prot_TBR40277.1_1761
lcl|SIZZ01000001.1_prot_TBR40278.1_1762	K11904
lcl|SIZZ01000001.1_prot_TBR40279.1_1763
lcl|SIZZ01000001.1_prot_TBR40280.1_1764
lcl|SIZZ01000001.1_prot_TBR40763.1_1765
lcl|SIZZ01000001.1_prot_TBR40281.1_1766	K01952
lcl|SIZZ01000001.1_prot_TBR40282.1_1767	K03981
lcl|SIZZ01000001.1_prot_TBR40764.1_1768	K04763
lcl|SIZZ01000001.1_prot_TBR40283.1_1769
lcl|SIZZ01000001.1_prot_TBR40284.1_1770	K05973
lcl|SIZZ01000001.1_prot_TBR40285.1_1771
lcl|SIZZ01000001.1_prot_TBR40286.1_1772	K01620
lcl|SIZZ01000001.1_prot_TBR40287.1_1773	K24819
lcl|SIZZ01000001.1_prot_TBR40288.1_1774	K11720
lcl|SIZZ01000001.1_prot_TBR40289.1_1775	K07091
lcl|SIZZ01000001.1_prot_TBR40290.1_1776	K01255
lcl|SIZZ01000001.1_prot_TBR40291.1_1777	K02339
lcl|SIZZ01000001.1_prot_TBR40292.1_1778	K07648
lcl|SIZZ01000001.1_prot_TBR40293.1_1779	K18939
lcl|SIZZ01000001.1_prot_TBR40294.1_1780	K18139
lcl|SIZZ01000001.1_prot_TBR40295.1_1781	K18138
lcl|SIZZ01000001.1_prot_TBR40765.1_1782	K03585
lcl|SIZZ01000001.1_prot_TBR40296.1_1783
lcl|SIZZ01000001.1_prot_TBR40297.1_1784
lcl|SIZZ01000001.1_prot_TBR40298.1_1785
lcl|SIZZ01000001.1_prot_TBR40299.1_1786
lcl|SIZZ01000001.1_prot_TBR40300.1_1787	K10716
lcl|SIZZ01000001.1_prot_TBR40766.1_1788
lcl|SIZZ01000001.1_prot_TBR40301.1_1789	K03296
lcl|SIZZ01000001.1_prot_TBR40302.1_1790
lcl|SIZZ01000001.1_prot_TBR40303.1_1791
lcl|SIZZ01000001.1_prot_TBR40304.1_1792	K01752
lcl|SIZZ01000001.1_prot_TBR40305.1_1793
lcl|SIZZ01000001.1_prot_TBR40306.1_1794	K00003
lcl|SIZZ01000001.1_prot_TBR40307.1_1795	K01739
lcl|SIZZ01000001.1_prot_TBR40308.1_1796	K00641
lcl|SIZZ01000001.1_prot_TBR40309.1_1797
lcl|SIZZ01000001.1_prot_TBR40310.1_1798
lcl|SIZZ01000001.1_prot_TBR40311.1_1799	K08987
lcl|SIZZ01000001.1_prot_TBR40312.1_1800
lcl|SIZZ01000001.1_prot_TBR40313.1_1801	K02837
lcl|SIZZ01000001.1_prot_TBR40314.1_1802
lcl|SIZZ01000001.1_prot_TBR40315.1_1803
lcl|SIZZ01000001.1_prot_TBR40316.1_1804	K00575
lcl|SIZZ01000001.1_prot_TBR40317.1_1805
lcl|SIZZ01000001.1_prot_TBR40318.1_1806	K18444
lcl|SIZZ01000001.1_prot_TBR40319.1_1807
lcl|SIZZ01000001.1_prot_TBR40320.1_1808	K06445
lcl|SIZZ01000001.1_prot_TBR40321.1_1809
lcl|SIZZ01000001.1_prot_TBR40322.1_1810
lcl|SIZZ01000001.1_prot_TBR40323.1_1811	K01596
lcl|SIZZ01000001.1_prot_TBR40324.1_1812	K03088
lcl|SIZZ01000001.1_prot_TBR40325.1_1813
lcl|SIZZ01000001.1_prot_TBR40326.1_1814
lcl|SIZZ01000001.1_prot_1815
lcl|SIZZ01000001.1_prot_TBR40327.1_1816
lcl|SIZZ01000001.1_prot_TBR40328.1_1817
lcl|SIZZ01000001.1_prot_TBR40329.1_1818	K04083
lcl|SIZZ01000001.1_prot_TBR40330.1_1819	K03814
lcl|SIZZ01000001.1_prot_TBR40331.1_1820	K20534
lcl|SIZZ01000001.1_prot_TBR40332.1_1821
lcl|SIZZ01000001.1_prot_TBR40333.1_1822
lcl|SIZZ01000001.1_prot_TBR40334.1_1823	K00108
lcl|SIZZ01000001.1_prot_TBR40335.1_1824	K03799
lcl|SIZZ01000001.1_prot_TBR40336.1_1825	K03744
lcl|SIZZ01000001.1_prot_TBR40337.1_1826
lcl|SIZZ01000001.1_prot_TBR40338.1_1827
lcl|SIZZ01000001.1_prot_TBR40339.1_1828	K03764
lcl|SIZZ01000001.1_prot_TBR40340.1_1829	K02437
lcl|SIZZ01000001.1_prot_TBR40341.1_1830	K00605
lcl|SIZZ01000001.1_prot_TBR40342.1_1831	K00955
lcl|SIZZ01000001.1_prot_TBR40343.1_1832	K00957
lcl|SIZZ01000001.1_prot_TBR40344.1_1833	K02066
lcl|SIZZ01000001.1_prot_TBR40345.1_1834	K02065
lcl|SIZZ01000001.1_prot_TBR40346.1_1835	K02067
lcl|SIZZ01000001.1_prot_TBR40347.1_1836	K18480
lcl|SIZZ01000001.1_prot_TBR40348.1_1837
lcl|SIZZ01000001.1_prot_TBR40349.1_1838
lcl|SIZZ01000001.1_prot_TBR40350.1_1839	K02433
lcl|SIZZ01000001.1_prot_TBR40351.1_1840	K00311
lcl|SIZZ01000001.1_prot_TBR40352.1_1841
lcl|SIZZ01000001.1_prot_TBR40353.1_1842	K03521
lcl|SIZZ01000001.1_prot_TBR40354.1_1843	K03522
lcl|SIZZ01000001.1_prot_TBR40355.1_1844
lcl|SIZZ01000001.1_prot_TBR40356.1_1845
lcl|SIZZ01000001.1_prot_TBR40357.1_1846
lcl|SIZZ01000001.1_prot_TBR40358.1_1847
lcl|SIZZ01000001.1_prot_TBR40359.1_1848
lcl|SIZZ01000001.1_prot_TBR40360.1_1849	K03273
lcl|SIZZ01000001.1_prot_TBR40361.1_1850	K00966
lcl|SIZZ01000001.1_prot_TBR40767.1_1851	K03271
lcl|SIZZ01000001.1_prot_TBR40362.1_1852	K07031
lcl|SIZZ01000001.1_prot_TBR40363.1_1853
lcl|SIZZ01000001.1_prot_TBR40364.1_1854	K09691
lcl|SIZZ01000001.1_prot_TBR40768.1_1855	K09690
lcl|SIZZ01000001.1_prot_TBR40365.1_1856	K01758
lcl|SIZZ01000001.1_prot_TBR40366.1_1857
lcl|SIZZ01000001.1_prot_TBR40367.1_1858	K01710
lcl|SIZZ01000001.1_prot_TBR40368.1_1859	K00973
lcl|SIZZ01000001.1_prot_TBR40369.1_1860	K01790
lcl|SIZZ01000001.1_prot_TBR40370.1_1861	K00067
lcl|SIZZ01000001.1_prot_TBR40371.1_1862	K16011
lcl|SIZZ01000001.1_prot_TBR40372.1_1863
lcl|SIZZ01000001.1_prot_TBR40373.1_1864	K00820
lcl|SIZZ01000001.1_prot_TBR40374.1_1865	K01697
lcl|SIZZ01000001.1_prot_TBR40375.1_1866
lcl|SIZZ01000001.1_prot_TBR40376.1_1867
lcl|SIZZ01000001.1_prot_TBR40377.1_1868
lcl|SIZZ01000001.1_prot_TBR40769.1_1869
lcl|SIZZ01000001.1_prot_TBR40378.1_1870
lcl|SIZZ01000001.1_prot_TBR40379.1_1871	K01801
lcl|SIZZ01000001.1_prot_TBR40380.1_1872	K00927
lcl|SIZZ01000001.1_prot_TBR40381.1_1873	K01091
lcl|SIZZ01000001.1_prot_TBR40382.1_1874	K00615
lcl|SIZZ01000001.1_prot_TBR40383.1_1875
lcl|SIZZ01000001.1_prot_TBR40770.1_1876
lcl|SIZZ01000001.1_prot_TBR40384.1_1877
lcl|SIZZ01000001.1_prot_TBR40385.1_1878
lcl|SIZZ01000001.1_prot_TBR40771.1_1879
lcl|SIZZ01000001.1_prot_TBR40386.1_1880
lcl|SIZZ01000001.1_prot_TBR40772.1_1881
lcl|SIZZ01000001.1_prot_TBR40387.1_1882
lcl|SIZZ01000001.1_prot_TBR40388.1_1883	K19802
lcl|SIZZ01000001.1_prot_TBR40773.1_1884	K03305
lcl|SIZZ01000001.1_prot_TBR40389.1_1885
lcl|SIZZ01000001.1_prot_TBR40390.1_1886	K12687
lcl|SIZZ01000001.1_prot_TBR40391.1_1887	K12687
lcl|SIZZ01000001.1_prot_TBR40392.1_1888	K07814
lcl|SIZZ01000001.1_prot_TBR40393.1_1889	K11527
lcl|SIZZ01000001.1_prot_TBR40394.1_1890
lcl|SIZZ01000001.1_prot_TBR40395.1_1891
lcl|SIZZ01000001.1_prot_TBR40396.1_1892
lcl|SIZZ01000001.1_prot_TBR40397.1_1893	K03183
lcl|SIZZ01000001.1_prot_TBR40398.1_1894
lcl|SIZZ01000001.1_prot_1895
lcl|SIZZ01000001.1_prot_TBR40399.1_1896
lcl|SIZZ01000001.1_prot_TBR40400.1_1897
lcl|SIZZ01000001.1_prot_TBR40401.1_1898	K00104
lcl|SIZZ01000001.1_prot_TBR40402.1_1899
lcl|SIZZ01000001.1_prot_TBR40403.1_1900
lcl|SIZZ01000001.1_prot_TBR40404.1_1901
lcl|SIZZ01000001.1_prot_TBR40405.1_1902
lcl|SIZZ01000001.1_prot_TBR40406.1_1903
lcl|SIZZ01000001.1_prot_TBR40407.1_1904
lcl|SIZZ01000001.1_prot_TBR40408.1_1905
lcl|SIZZ01000001.1_prot_TBR40409.1_1906
lcl|SIZZ01000001.1_prot_TBR40410.1_1907
lcl|SIZZ01000001.1_prot_TBR40411.1_1908
lcl|SIZZ01000001.1_prot_TBR40774.1_1909
lcl|SIZZ01000001.1_prot_TBR40412.1_1910
lcl|SIZZ01000001.1_prot_TBR40413.1_1911
lcl|SIZZ01000001.1_prot_TBR40414.1_1912
lcl|SIZZ01000001.1_prot_TBR40415.1_1913
lcl|SIZZ01000001.1_prot_TBR40416.1_1914
lcl|SIZZ01000001.1_prot_TBR40417.1_1915
lcl|SIZZ01000001.1_prot_TBR40418.1_1916
lcl|SIZZ01000001.1_prot_TBR40775.1_1917
lcl|SIZZ01000001.1_prot_TBR40419.1_1918
lcl|SIZZ01000001.1_prot_TBR40420.1_1919
lcl|SIZZ01000001.1_prot_TBR40421.1_1920
lcl|SIZZ01000001.1_prot_TBR40422.1_1921
lcl|SIZZ01000001.1_prot_TBR40423.1_1922	K06996
lcl|SIZZ01000001.1_prot_TBR40424.1_1923
lcl|SIZZ01000001.1_prot_TBR40425.1_1924	K00799
lcl|SIZZ01000001.1_prot_TBR40426.1_1925
lcl|SIZZ01000001.1_prot_TBR40427.1_1926
lcl|SIZZ01000001.1_prot_TBR40428.1_1927
lcl|SIZZ01000001.1_prot_TBR40429.1_1928	K00368
lcl|SIZZ01000001.1_prot_TBR40430.1_1929
lcl|SIZZ01000001.1_prot_TBR40776.1_1930
lcl|SIZZ01000001.1_prot_TBR40431.1_1931
lcl|SIZZ01000001.1_prot_TBR40432.1_1932	K07032
lcl|SIZZ01000001.1_prot_TBR40433.1_1933
lcl|SIZZ01000001.1_prot_TBR40434.1_1934
lcl|SIZZ01000001.1_prot_TBR40435.1_1935
lcl|SIZZ01000001.1_prot_TBR40436.1_1936
lcl|SIZZ01000001.1_prot_TBR40437.1_1937
lcl|SIZZ01000001.1_prot_TBR40438.1_1938	K07052
lcl|SIZZ01000001.1_prot_TBR40439.1_1939
lcl|SIZZ01000001.1_prot_TBR40440.1_1940
lcl|SIZZ01000001.1_prot_TBR40441.1_1941	K01623
lcl|SIZZ01000001.1_prot_TBR40442.1_1942
lcl|SIZZ01000001.1_prot_TBR40443.1_1943	K00873
lcl|SIZZ01000001.1_prot_TBR40444.1_1944	K05986
lcl|SIZZ01000001.1_prot_TBR40445.1_1945
lcl|SIZZ01000001.1_prot_TBR40446.1_1946	K00134
lcl|SIZZ01000001.1_prot_TBR40447.1_1947
lcl|SIZZ01000001.1_prot_TBR40448.1_1948	K11065
lcl|SIZZ01000001.1_prot_TBR40449.1_1949	K16171
lcl|SIZZ01000001.1_prot_TBR40777.1_1950
lcl|SIZZ01000001.1_prot_TBR40450.1_1951	K00451
lcl|SIZZ01000001.1_prot_TBR40451.1_1952
lcl|SIZZ01000001.1_prot_TBR40452.1_1953	K00457
lcl|SIZZ01000001.1_prot_TBR40453.1_1954
lcl|SIZZ01000001.1_prot_TBR40454.1_1955	K03305
lcl|SIZZ01000001.1_prot_TBR40455.1_1956	K00453
lcl|SIZZ01000001.1_prot_TBR40456.1_1957	K00166
lcl|SIZZ01000001.1_prot_TBR40457.1_1958	K00167
lcl|SIZZ01000001.1_prot_TBR40458.1_1959	K09699
lcl|SIZZ01000001.1_prot_TBR40459.1_1960
lcl|SIZZ01000001.1_prot_TBR40460.1_1961
lcl|SIZZ01000001.1_prot_TBR40461.1_1962
lcl|SIZZ01000001.1_prot_TBR40462.1_1963
lcl|SIZZ01000001.1_prot_TBR40463.1_1964
lcl|SIZZ01000001.1_prot_TBR40464.1_1965	K01867
lcl|SIZZ01000001.1_prot_TBR40465.1_1966	K01476
lcl|SIZZ01000001.1_prot_TBR40466.1_1967
lcl|SIZZ01000001.1_prot_TBR40467.1_1968
lcl|SIZZ01000001.1_prot_TBR40468.1_1969	K01947
lcl|SIZZ01000001.1_prot_TBR40469.1_1970	K03524
lcl|SIZZ01000001.1_prot_TBR40470.1_1971
lcl|SIZZ01000001.1_prot_TBR40471.1_1972	K09933
lcl|SIZZ01000001.1_prot_TBR40472.1_1973	K07637
lcl|SIZZ01000001.1_prot_TBR40473.1_1974	K07660
lcl|SIZZ01000001.1_prot_TBR40474.1_1975
lcl|SIZZ01000001.1_prot_TBR40475.1_1976	K05539
lcl|SIZZ01000001.1_prot_TBR40476.1_1977
lcl|SIZZ01000001.1_prot_TBR40778.1_1978
lcl|SIZZ01000001.1_prot_TBR40477.1_1979
lcl|SIZZ01000001.1_prot_TBR40478.1_1980
lcl|SIZZ01000001.1_prot_TBR40479.1_1981
lcl|SIZZ01000001.1_prot_TBR40779.1_1982	K13069
lcl|SIZZ01000001.1_prot_TBR40480.1_1983
lcl|SIZZ01000001.1_prot_TBR40481.1_1984	K07704
lcl|SIZZ01000001.1_prot_TBR40780.1_1985
lcl|SIZZ01000001.1_prot_TBR40482.1_1986
lcl|SIZZ01000001.1_prot_TBR40483.1_1987	K06949
lcl|SIZZ01000001.1_prot_TBR40484.1_1988
lcl|SIZZ01000001.1_prot_TBR40781.1_1989
lcl|SIZZ01000001.1_prot_TBR40485.1_1990
lcl|SIZZ01000001.1_prot_TBR40486.1_1991	K03503
lcl|SIZZ01000001.1_prot_TBR40487.1_1992
lcl|SIZZ01000001.1_prot_TBR40488.1_1993	K14161
lcl|SIZZ01000001.1_prot_TBR40489.1_1994	K14162
lcl|SIZZ01000001.1_prot_TBR40490.1_1995
lcl|SIZZ01000001.1_prot_TBR40491.1_1996	K07679
lcl|SIZZ01000001.1_prot_TBR40492.1_1997
[truncated: 1,680 more rows]

## Sheet: Pathways
Identified KEGG pathways (numbers of associated K# in parentheses)
00010 Glycolysis / Gluconeogenesis (27)
00020 Citrate cycle (TCA cycle) (21)
00030 Pentose phosphate pathway (21)
00040 Pentose and glucuronate interconversions (4)
00051 Fructose and mannose metabolism (18)
00052 Galactose metabolism (9)
00053 Ascorbate and aldarate metabolism (4)
00500 Starch and sucrose metabolism (13)
00520 Amino sugar and nucleotide sugar metabolism (31)
00620 Pyruvate metabolism (29)
00630 Glyoxylate and dicarboxylate metabolism (23)
00640 Propanoate metabolism (24)
00650 Butanoate metabolism (21)
00660 C5-Branched dibasic acid metabolism (7)
00562 Inositol phosphate metabolism (2)
00190 Oxidative phosphorylation (45)
00195 Photosynthesis (8)
00710 Carbon fixation in photosynthetic organisms (12)
00720 Carbon fixation pathways in prokaryotes (23)
00680 Methane metabolism (15)
00910 Nitrogen metabolism (8)
00920 Sulfur metabolism (16)
00061 Fatty acid biosynthesis (14)
00071 Fatty acid degradation (14)
00561 Glycerolipid metabolism (7)
00564 Glycerophospholipid metabolism (17)
00565 Ether lipid metabolism (1)
00590 Arachidonic acid metabolism (3)
00591 Linoleic acid metabolism (1)
00592 alpha-Linolenic acid metabolism (2)
01040 Biosynthesis of unsaturated fatty acids (6)
00230 Purine metabolism (42)
00240 Pyrimidine metabolism (30)
00250 Alanine, aspartate and glutamate metabolism (21)
00260 Glycine, serine and threonine metabolism (29)
00270 Cysteine and methionine metabolism (34)
00280 Valine, leucine and isoleucine degradation (22)
00290 Valine, leucine and isoleucine biosynthesis (12)
00300 Lysine biosynthesis (12)
00310 Lysine degradation (8)
00220 Arginine biosynthesis (12)
00330 Arginine and proline metabolism (17)
00340 Histidine metabolism (18)
00350 Tyrosine metabolism (10)
00360 Phenylalanine metabolism (9)
00380 Tryptophan metabolism (14)
00400 Phenylalanine, tyrosine and tryptophan biosynthesis (19)
00410 beta-Alanine metabolism (7)
00430 Taurine and hypotaurine metabolism (4)
00440 Phosphonate and phosphinate metabolism (1)
00450 Selenocompound metabolism (11)
00460 Cyanoamino acid metabolism (6)
00470 D-Amino acid metabolism (8)
00480 Glutathione metabolism (14)
00513 Various types of N-glycan biosynthesis (1)
00514 Other types of O-glycan biosynthesis (1)
00531 Glycosaminoglycan degradation (3)
00603 Glycosphingolipid biosynthesis - globo and isoglobo series (1)
00604 Glycosphingolipid biosynthesis - ganglio series (1)
00540 Lipopolysaccharide biosynthesis (18)
00541 O-Antigen nucleotide sugar biosynthesis (17)
00550 Peptidoglycan biosynthesis (20)
00511 Other glycan degradation (2)
00571 Lipoarabinomannan (LAM) biosynthesis (1)
00730 Thiamine metabolism (9)
00740 Riboflavin metabolism (9)
00750 Vitamin B6 metabolism (7)
00760 Nicotinate and nicotinamide metabolism (16)
00770 Pantothenate and CoA biosynthesis (18)
00780 Biotin metabolism (13)
00785 Lipoic acid metabolism (3)
00790 Folate biosynthesis (17)
00670 One carbon pool by folate (12)
00830 Retinol metabolism (2)
00860 Porphyrin metabolism (26)
00130 Ubiquinone and other terpenoid-quinone biosynthesis (9)
00900 Terpenoid backbone biosynthesis (11)
00981 Insect hormone biosynthesis (1)
00908 Zeatin biosynthesis (1)
00903 Limonene and pinene degradation (2)
00281 Geraniol degradation (4)
01051 Biosynthesis of ansamycins (1)
00523 Polyketide sugar unit biosynthesis (4)
01054 Nonribosomal peptide structures (1)
01053 Biosynthesis of siderophore group nonribosomal peptides (1)
01055 Biosynthesis of vancomycin group antibiotics (1)
00940 Phenylpropanoid biosynthesis (1)
00950 Isoquinoline alkaloid biosynthesis (2)
00960 Tropane, piperidine and pyridine alkaloid biosynthesis (4)
00965 Betalain biosynthesis (1)
00966 Glucosinolate biosynthesis (2)
00311 Penicillin and cephalosporin biosynthesis (1)
00261 Monobactam biosynthesis (7)
00521 Streptomycin biosynthesis (7)
00524 Neomycin, kanamycin and gentamicin biosynthesis (1)
00525 Acarbose and validamycin biosynthesis (2)
00401 Novobiocin biosynthesis (3)
00405 Phenazine biosynthesis (3)
00333 Prodigiosin biosynthesis (3)
00998 Biosynthesis of various antibiotics (1)
00999 Biosynthesis of various plant secondary metabolites (2)
00362 Benzoate degradation (7)
00627 Aminobenzoate degradation (1)
00364 Fluorobenzoate degradation (1)
00625 Chloroalkane and chloroalkene degradation (5)
00361 Chlorocyclohexane and chlorobenzene degradation (3)
00623 Toluene degradation (1)
00642 Ethylbenzene degradation (1)
00643 Styrene degradation (2)
00930 Caprolactam degradation (1)
00626 Naphthalene degradation (2)
00980 Metabolism of xenobiotics by cytochrome P450 (4)
00982 Drug metabolism - cytochrome P450 (3)
00983 Drug metabolism - other enzymes (10)
03020 RNA polymerase (4)
03040 Spliceosome (1)
03010 Ribosome (53)
00970 Aminoacyl-tRNA biosynthesis (24)
03008 Ribosome biogenesis in eukaryotes (2)
03060 Protein export (13)
04141 Protein processing in endoplasmic reticulum (2)
04122 Sulfur relay system (4)
03018 RNA degradation (16)
03030 DNA replication (14)
03410 Base excision repair (11)
03420 Nucleotide excision repair (7)
03430 Mismatch repair (16)
03440 Homologous recombination (22)
03450 Non-homologous end-joining (2)
02010 ABC transporters (35)
02060 Phosphotransferase system (PTS) (4)
03070 Bacterial secretion system (26)
02020 Two-component system (99)
04013 MAPK signaling pathway - fly (1)
04016 MAPK signaling pathway - plant (2)
04066 HIF-1 signaling pathway (4)
04068 FoxO signaling pathway (2)
04070 Phosphatidylinositol signaling system (3)
04072 Phospholipase D signaling pathway (1)
04151 PI3K-Akt signaling pathway (2)
04152 AMPK signaling pathway (3)
04150 mTOR signaling pathway (1)
04142 Lysosome (3)
04146 Peroxisome (5)
04112 Cell cycle - Caulobacter (12)
04113 Meiosis - yeast (1)
04210 Apoptosis (1)
04214 Apoptosis - fly (1)
04215 Apoptosis - multiple species (1)
04216 Ferroptosis (2)
04217 Necroptosis (3)
04115 p53 signaling pathway (1)
02024 Quorum sensing (28)
05111 Biofilm formation - Vibrio cholerae (13)
02025 Biofilm formation - Pseudomonas aeruginosa (19)
02026 Biofilm formation - Escherichia coli (16)
02030 Bacterial chemotaxis (13)
02040 Flagellar assembly (35)
04621 NOD-like receptor signaling pathway (3)
04612 Antigen processing and presentation (1)
04659 Th17 cell differentiation (1)
04657 IL-17 signaling pathway (1)
04910 Insulin signaling pathway (2)
04922 Glucagon signaling pathway (4)
04920 Adipocytokine signaling pathway (2)
03320 PPAR signaling pathway (7)
04915 Estrogen signaling pathway (1)
04914 Progesterone-mediated oocyte maturation (1)
04918 Thyroid hormone synthesis (2)
04614 Renin-angiotensin system (1)
04260 Cardiac muscle contraction (3)
04970 Salivary secretion (1)
04972 Pancreatic secretion (1)
04973 Carbohydrate digestion and absorption (1)
04974 Protein digestion and absorption (2)
04975 Fat digestion and absorption (1)
04978 Mineral absorption (1)
04964 Proximal tubule bicarbonate reclamation (1)
04724 Glutamatergic synapse (2)
04727 GABAergic synapse (1)
04723 Retrograde endocannabinoid signaling (1)
04721 Synaptic vesicle cycle (1)
04361 Axon regeneration (1)
04211 Longevity regulating pathway (1)
04212 Longevity regulating pathway - worm (6)
04213 Longevity regulating pathway - multiple species (2)
04714 Thermogenesis (7)
04626 Plant-pathogen interaction (5)
05200 Pathways in cancer (4)
05202 Transcriptional misregulation in cancer (1)
05206 MicroRNAs in cancer (1)
05205 Proteoglycans in cancer (1)
05204 Chemical carcinogenesis - DNA adducts (1)
05207 Chemical carcinogenesis - receptor activation (2)
05208 Chemical carcinogenesis - reactive oxygen species (6)
05203 Viral carcinogenesis (1)
05230 Central carbon metabolism in cancer (5)
05231 Choline metabolism in cancer (1)
05210 Colorectal cancer (1)
05225 Hepatocellular carcinoma (1)
05211 Renal cell carcinoma (1)
05215 Prostate cancer (1)
05222 Small cell lung cancer (1)
05170 Human immunodeficiency virus 1 infection (1)
05161 Hepatitis B (1)
05160 Hepatitis C (1)
05164 Influenza A (1)
05162 Measles (1)
05168 Herpes simplex virus 1 infection (1)
05163 Human cytomegalovirus infection (1)
05167 Kaposi sarcoma-associated herpesvirus infection (1)
05169 Epstein-Barr virus infection (1)
05165 Human papillomavirus infection (1)
05120 Epithelial cell signaling in Helicobacter pylori infection (1)
05130 Pathogenic Escherichia coli infection (2)
05132 Salmonella infection (6)
05131 Shigellosis (4)
05133 Pertussis (7)
05134 Legionellosis (5)
05150 Staphylococcus aureus infection (2)
05152 Tuberculosis (4)
05100 Bacterial invasion of epithelial cells (1)
05146 Amoebiasis (1)
05145 Toxoplasmosis (1)
05340 Primary immunodeficiency (1)
05010 Alzheimer disease (7)
05012 Parkinson disease (6)
05014 Amyotrophic lateral sclerosis (6)
05016 Huntington disease (7)
05017 Spinocerebellar ataxia (3)
05020 Prion disease (5)
05022 Pathways of neurodegeneration - multiple diseases (7)
05417 Lipid and atherosclerosis (4)
05418 Fluid shear stress and atherosclerosis (4)
05415 Diabetic cardiomyopathy (8)
05416 Viral myocarditis (1)
04930 Type II diabetes mellitus (1)
04940 Type I diabetes mellitus (1)
04936 Alcoholic liver disease (5)
04932 Non-alcoholic fatty liver disease (5)
04931 Insulin resistance (3)
04934 Cushing syndrome (2)
01501 beta-Lactam resistance (14)
01502 Vancomycin resistance (6)
01503 Cationic antimicrobial peptide (CAMP) resistance (13)
01524 Platinum drug resistance (3)
01523 Antifolate resistance (4)

## Sheet: Level 1- Metabolism
Level 1 KEGG Annotations for Metabolism
A09100	Metabolism
B
B	9101	Carbohydrate	metabolism
C	10	Glycolysis	/	Gluconeogenesis	[PATH:ko00010]
D	lcl|SIZZ01000002.1_prot_TBR36645.1_2362;	K00845	glk;	glucokinase	[EC:2.7.1.2]
D	lcl|SIZZ01000003.1_prot_TBR36126.1_3176;	K00845	glk;	glucokinase	[EC:2.7.1.2]
D	lcl|SIZZ01000001.1_prot_TBR39015.1_368;	K01810	GPI,	pgi;	glucose-6-phosphate	isomerase	[EC:5.3.1.9]
D	lcl|SIZZ01000003.1_prot_TBR36346.1_3420;	K21071	pfk,	pfp;	ATP-dependent	phosphofructokinase	/	diphosphate-dependent	phosphofructokinase	[EC:2.7.1.11	2.7.1.90]
D	lcl|SIZZ01000004.1_prot_TBR35844.1_3507;	K03841	FBP,	fbp;	fructose-1,6-bisphosphatase	I	[EC:3.1.3.11]
D	lcl|SIZZ01000001.1_prot_TBR40441.1_1941;	K01623	ALDO;	fructose-bisphosphate	aldolase,	class	I	[EC:4.1.2.13]
D	lcl|SIZZ01000001.1_prot_TBR39833.1_1273;	K11645	fbaB;	fructose-bisphosphate	aldolase,	class	I	[EC:4.1.2.13]
D	lcl|SIZZ01000001.1_prot_TBR39599.1_1019;	K01803	TPI,	tpiA;	triosephosphate	isomerase	(TIM)	[EC:5.3.1.1]
D	lcl|SIZZ01000001.1_prot_TBR40446.1_1946;	K00134	GAPDH,	gapA;	glyceraldehyde	3-phosphate	dehydrogenase	(phosphorylating)	[EC:1.2.1.12]
D	lcl|SIZZ01000001.1_prot_TBR40380.1_1872;	K00927	PGK,	pgk;	phosphoglycerate	kinase	[EC:2.7.2.3]
D	lcl|SIZZ01000002.1_prot_TBR36553.1_2265;	K01834	PGAM,	gpmA;	2,3-bisphosphoglycerate-dependent	phosphoglycerate	mutase	[EC:5.4.2.11]
D	lcl|SIZZ01000001.1_prot_TBR39123.1_484;	K01689	ENO,	eno;	enolase	[EC:4.2.1.11]
D	lcl|SIZZ01000001.1_prot_TBR40443.1_1943;	K00873	PK,	pyk;	pyruvate	kinase	[EC:2.7.1.40]
D	lcl|SIZZ01000001.1_prot_TBR39679.1_1103;	K01007	pps,	ppsA;	pyruvate,	water	dikinase	[EC:2.7.9.2]
D	lcl|SIZZ01000001.1_prot_TBR39427.1_825;	K00163	aceE;	pyruvate	dehydrogenase	E1	component	[EC:1.2.4.1]
D	lcl|SIZZ01000002.1_prot_TBR36781.1_2518;	K00163	aceE;	pyruvate	dehydrogenase	E1	component	[EC:1.2.4.1]
D	lcl|SIZZ01000002.1_prot_TBR36802.1_2542;	K00627	DLAT,	aceF,	pdhC;	pyruvate	dehydrogenase	E2	component	(dihydrolipoamide	acetyltransferase)	[EC:2.3.1.12]
D	lcl|SIZZ01000001.1_prot_TBR39232.1_604;	K00382	DLD,	lpd,	pdhD;	dihydrolipoamide	dehydrogenase	[EC:1.8.1.4]
D	lcl|SIZZ01000002.1_prot_TBR36803.1_2543;	K00382	DLD,	lpd,	pdhD;	dihydrolipoamide	dehydrogenase	[EC:1.8.1.4]
D	lcl|SIZZ01000002.1_prot_TBR36631.1_2346;	K00121	frmA,	ADH5,	adhC;	S-(hydroxymethyl)glutathione	dehydrogenase	/	alcohol	dehydrogenase	[EC:1.1.1.284	1.1.1.1]
D	lcl|SIZZ01000001.1_prot_TBR39490.1_897;	K13953	adhP;	alcohol	dehydrogenase,	propanol-preferring	[EC:1.1.1.1]
D	lcl|SIZZ01000002.1_prot_TBR36688.1_2414;	K13953	adhP;	alcohol	dehydrogenase,	propanol-preferring	[EC:1.1.1.1]
D	lcl|SIZZ01000001.1_prot_TBR39078.1_438;	K13979	yahK;	alcohol	dehydrogenase	(NADP+)	[EC:1.1.1.2]
D	lcl|SIZZ01000001.1_prot_TBR40614.1_2127;	K22474	adhB;	alcohol	dehydrogenase	(quinone),	cytochrome	c	subunit	[EC:1.1.5.5]
D	lcl|SIZZ01000004.1_prot_TBR35960.1_3631;	K00128	ALDH;	aldehyde	dehydrogenase	(NAD+)	[EC:1.2.1.3]
D	lcl|SIZZ01000001.1_prot_TBR39704.1_1131;	K14085	ALDH7A1;	aldehyde	dehydrogenase	family	7	member	A1	[EC:1.2.1.31	1.2.1.8	1.2.1.3]
D	lcl|SIZZ01000004.1_prot_TBR35860.1_3525;	K01895	ACSS1_2,	acs;	acetyl-CoA	synthetase	[EC:6.2.1.1]
D	lcl|SIZZ01000003.1_prot_TBR36031.1_3066;	K01785	galM,	GALM;	aldose	1-epimerase	[EC:5.1.3.3]
D	lcl|SIZZ01000004.1_prot_TBR35784.1_3443;	K15778	pmm-pgm;	phosphomannomutase	/	phosphoglucomutase	[EC:5.4.2.8	5.4.2.2]
D	lcl|SIZZ01000001.1_prot_TBR40323.1_1811;	K01596	E4.1.1.32,	pckA,	PCK;	phosphoenolpyruvate	carboxykinase	(GTP)	[EC:4.1.1.32]
D	lcl|SIZZ01000002.1_prot_TBR36646.1_2363;	K01223	E3.2.1.86B,	bglA;	6-phospho-beta-glucosidase	[EC:3.2.1.86]
C	20	Citrate	cycle	(TCA	cycle)	[PATH:ko00020]
D	lcl|SIZZ01000002.1_prot_TBR36882.1_2627;	K01647	CS,	gltA;	citrate	synthase	[EC:2.3.3.1]
D	lcl|SIZZ01000001.1_prot_TBR39575.1_991;	K01681	ACO,	acnA;	aconitate	hydratase	[EC:4.2.1.3]
D	lcl|SIZZ01000001.1_prot_TBR40699.1_990;	K01682	acnB;	aconitate	hydratase	2	/	2-methylisocitrate	dehydratase	[EC:4.2.1.3	4.2.1.99]
D	lcl|SIZZ01000003.1_prot_TBR36213.1_3275;	K00031	IDH1,	IDH2,	icd;	isocitrate	dehydrogenase	[EC:1.1.1.42]
D	lcl|SIZZ01000001.1_prot_TBR38998.1_350;	K00030	IDH3;	isocitrate	dehydrogenase	(NAD+)	[EC:1.1.1.41]
D	lcl|SIZZ01000001.1_prot_TBR39234.1_606;	K00164	OGDH,	sucA;	2-oxoglutarate	dehydrogenase	E1	component	[EC:1.2.4.2]
D	lcl|SIZZ01000001.1_prot_TBR39233.1_605;	K00658	DLST,	sucB;	2-oxoglutarate	dehydrogenase	E2	component	(dihydrolipoamide	succinyltransferase)	[EC:2.3.1.61]
D	lcl|SIZZ01000001.1_prot_TBR39232.1_604;	K00382	DLD,	lpd,	pdhD;	dihydrolipoamide	dehydrogenase	[EC:1.8.1.4]
D	lcl|SIZZ01000002.1_prot_TBR36803.1_2543;	K00382	DLD,	lpd,	pdhD;	dihydrolipoamide	dehydrogenase	[EC:1.8.1.4]
D	lcl|SIZZ01000002.1_prot_TBR37026.1_2782;	K01902	sucD;	succinyl-CoA	synthetase	alpha	subunit	[EC:6.2.1.5]
D	lcl|SIZZ01000002.1_prot_TBR37025.1_2781;	K01903	sucC;	succinyl-CoA	synthetase	beta	subunit	[EC:6.2.1.5]
D	lcl|SIZZ01000001.1_prot_TBR39973.1_1420;	K18118	aarC,	cat1;	succinyl-CoA:acetate	CoA-transferase	[EC:2.8.3.18]
D	lcl|SIZZ01000001.1_prot_TBR39160.1_527;	K00239	sdhA,	frdA;	succinate	dehydrogenase	/	fumarate	reductase,	flavoprotein	subunit	[EC:1.3.5.1	1.3.5.4]
D	lcl|SIZZ01000001.1_prot_TBR39161.1_528;	K00240	sdhB,	frdB;	succinate	dehydrogenase	/	fumarate	reductase,	iron-sulfur	subunit	[EC:1.3.5.1	1.3.5.4]
D	lcl|SIZZ01000001.1_prot_TBR39158.1_525;	K00241	sdhC,	frdC;	succinate	dehydrogenase	/	fumarate	reductase,	cytochrome	b	subunit
D	lcl|SIZZ01000001.1_prot_TBR39159.1_526;	K00242	sdhD,	frdD;	succinate	dehydrogenase	/	fumarate	reductase,	membrane	anchor	subunit
D	lcl|SIZZ01000002.1_prot_TBR37335.1_2862;	K01676	E4.2.1.2A,	fumA,	fumB;	fumarate	hydratase,	class	I	[EC:4.2.1.2]
D	lcl|SIZZ01000001.1_prot_TBR39245.1_617;	K01679	E4.2.1.2B,	fumC,	FH;	fumarate	hydratase,	class	II	[EC:4.2.1.2]
D	lcl|SIZZ01000001.1_prot_TBR39878.1_1320;	K00024	mdh;	malate	dehydrogenase	[EC:1.1.1.37]
D	lcl|SIZZ01000001.1_prot_TBR40323.1_1811;	K01596	E4.1.1.32,	pckA,	PCK;	phosphoenolpyruvate	carboxykinase	(GTP)	[EC:4.1.1.32]
D	lcl|SIZZ01000001.1_prot_TBR39427.1_825;	K00163	aceE;	pyruvate	dehydrogenase	E1	component	[EC:1.2.4.1]
D	lcl|SIZZ01000002.1_prot_TBR36781.1_2518;	K00163	aceE;	pyruvate	dehydrogenase	E1	component	[EC:1.2.4.1]
D	lcl|SIZZ01000002.1_prot_TBR36802.1_2542;	K00627	DLAT,	aceF,	pdhC;	pyruvate	dehydrogenase	E2	component	(dihydrolipoamide	acetyltransferase)	[EC:2.3.1.12]
C	30	Pentose	phosphate	pathway	[PATH:ko00030]
D	lcl|SIZZ01000001.1_prot_TBR39015.1_368;	K01810	GPI,	pgi;	glucose-6-phosphate	isomerase	[EC:5.3.1.9]
D	lcl|SIZZ01000004.1_prot_TBR35949.1_3618;	K00036	G6PD,	zwf;	glucose-6-phosphate	1-dehydrogenase	[EC:1.1.1.49	1.1.1.363]
D	lcl|SIZZ01000004.1_prot_TBR35950.1_3619;	K01057	PGLS,	pgl,	devB;	6-phosphogluconolactonase	[EC:3.1.1.31]
D	lcl|SIZZ01000002.1_prot_TBR36599.1_2312;	K00033	PGD,	gnd,	gntZ;	6-phosphogluconate	dehydrogenase	[EC:1.1.1.44	1.1.1.343]
D	lcl|SIZZ01000002.1_prot_TBR36815.1_2556;	K01783	rpe,	RPE;	ribulose-phosphate	3-epimerase	[EC:5.1.3.1]
D	lcl|SIZZ01000001.1_prot_TBR40382.1_1874;	K00615	E2.2.1.1,	tktA,	tktB;	transketolase	[EC:2.2.1.1]
D	lcl|SIZZ01000002.1_prot_TBR36495.1_2202;	K00615	E2.2.1.1,	tktA,	tktB;	transketolase	[EC:2.2.1.1]
D	lcl|SIZZ01000003.1_prot_TBR36302.1_3373;	K00616	E2.2.1.2,	talA,	talB;	transaldolase	[EC:2.2.1.2]
D	lcl|SIZZ01000002.1_prot_TBR36851.1_2595;	K01807	rpiA;	ribose	5-phosphate	isomerase	A	[EC:5.3.1.6]
D	lcl|SIZZ01000002.1_prot_TBR36746.1_2479;	K00852	rbsK,	RBKS;	ribokinase	[EC:2.7.1.15]
D	lcl|SIZZ01000004.1_prot_TBR35881.1_3548;	K00852	rbsK,	RBKS;	ribokinase	[EC:2.7.1.15]
D	lcl|SIZZ01000004.1_prot_TBR35784.1_3443;	K15778	pmm-pgm;	phosphomannomutase	/	phosphoglucomutase	[EC:5.4.2.8	5.4.2.2]
D	lcl|SIZZ01000002.1_prot_TBR37345.1_3040;	K00948	PRPS,	prsA;	ribose-phosphate	pyrophosphokinase	[EC:2.7.6.1]
D	lcl|SIZZ01000004.1_prot_TBR35951.1_3620;	K01690	edd;	phosphogluconate	dehydratase	[EC:4.2.1.12]
D	lcl|SIZZ01000004.1_prot_TBR35952.1_3621;	K01625	eda;	2-dehydro-3-deoxyphosphogluconate	aldolase	/	(4S)-4-hydroxy-2-oxoglutarate	aldolase	[EC:4.1.2.14	4.1.3.42]
D	lcl|SIZZ01000002.1_prot_TBR36683.1_2407;	K00034	gdh;	glucose	1-dehydrogenase	[EC:1.1.1.47]
D	lcl|SIZZ01000001.1_prot_TBR39702.1_1129;	K00117	gcd;	quinoprotein	glucose	dehydrogenase	[EC:1.1.5.2]
D	lcl|SIZZ01000001.1_prot_TBR40615.1_2128;	K06151	E1.1.99.3A;	gluconate	2-dehydrogenase	alpha	chain	[EC:1.1.99.3]
D	lcl|SIZZ01000001.1_prot_TBR40616.1_2129;	K06152	E1.1.99.3G;	gluconate	2-dehydrogenase	gamma	chain	[EC:1.1.99.3]
D	lcl|SIZZ01000001.1_prot_TBR40441.1_1941;	K01623	ALDO;	fructose-bisphosphate	aldolase,	class	I	[EC:4.1.2.13]
D	lcl|SIZZ01000001.1_prot_TBR39833.1_1273;	K11645	fbaB;	fructose-bisphosphate	aldolase,	class	I	[EC:4.1.2.13]
D	lcl|SIZZ01000004.1_prot_TBR35844.1_3507;	K03841	FBP,	fbp;	fructose-1,6-bisphosphatase	I	[EC:3.1.3.11]
D	lcl|SIZZ01000003.1_prot_TBR36346.1_3420;	K21071	pfk,	pfp;	ATP-dependent	phosphofructokinase	/	diphosphate-dependent	phosphofructokinase	[EC:2.7.1.11	2.7.1.90]
C	40	Pentose	and	glucuronate	interconversions	[PATH:ko00040]
D	lcl|SIZZ01000001.1_prot_TBR39674.1_1098;	K00012	UGDH,	ugd;	UDPglucose	6-dehydrogenase	[EC:1.1.1.22]
D	lcl|SIZZ01000001.1_prot_TBR39309.1_693;	K00963	UGP2,	galU,	galF;	UTP--glucose-1-phosphate	uridylyltransferase	[EC:2.7.7.9]
D	lcl|SIZZ01000002.1_prot_TBR36815.1_2556;	K01783	rpe,	RPE;	ribulose-phosphate	3-epimerase	[EC:5.1.3.1]
D	lcl|SIZZ01000001.1_prot_TBR40253.1_1733;	K00078	DHDH;	dihydrodiol	dehydrogenase	/	D-xylose	1-dehydrogenase	(NADP)	[EC:1.3.1.20	1.1.1.179]
C	51	Fructose	and	mannose	metabolism	[PATH:ko00051]
D	lcl|SIZZ01000002.1_prot_TBR37017.1_2772;	K00847	E2.7.1.4,	scrK;	fructokinase	[EC:2.7.1.4]
D	lcl|SIZZ01000001.1_prot_TBR40371.1_1862;	K16011	algA,	xanB,	rfbA,	wbpW,	pslB;	mannose-1-phosphate	guanylyltransferase	/	mannose-6-phosphate	isomerase	[EC:2.7.7.13	5.3.1.8]
D	lcl|SIZZ01000004.1_prot_TBR35784.1_3443;	K15778	pmm-pgm;	phosphomannomutase	/	phosphoglucomutase	[EC:5.4.2.8	5.4.2.2]
D	lcl|SIZZ01000001.1_prot_TBR40684.1_840;	K00971	manC,	cpsB;	mannose-1-phosphate	guanylyltransferase	[EC:2.7.7.13]
D	lcl|SIZZ01000001.1_prot_TBR40361.1_1850;	K00966	GMPP;	mannose-1-phosphate	guanylyltransferase	[EC:2.7.7.13]
D	lcl|SIZZ01000003.1_prot_TBR36346.1_3420;	K21071	pfk,	pfp;	ATP-dependent	phosphofructokinase	/	diphosphate-dependent	phosphofructokinase	[EC:2.7.1.11	2.7.1.90]
D	lcl|SIZZ01000004.1_prot_TBR35844.1_3507;	K03841	FBP,	fbp;	fructose-1,6-bisphosphatase	I	[EC:3.1.3.11]
D	lcl|SIZZ01000001.1_prot_TBR39830.1_1270;	K00882	fruK;	1-phosphofructokinase	[EC:2.7.1.56]
D	lcl|SIZZ01000001.1_prot_TBR39440.1_841;	K00066	algD;	GDP-mannose	6-dehydrogenase	[EC:1.1.1.132]
D	lcl|SIZZ01000001.1_prot_TBR40685.1_842;	K19290	alg8;	mannuronan	synthase	[EC:2.4.1.33]
D	lcl|SIZZ01000001.1_prot_TBR39441.1_843;	K19291	alg44;	mannuronan	synthase	[EC:2.4.1.33]
D	lcl|SIZZ01000001.1_prot_TBR40686.1_846;	K01795	algG;	mannuronan	5-epimerase	[EC:5.1.3.37]
D	lcl|SIZZ01000001.1_prot_TBR40687.1_851;	K01729	algL;	poly(beta-D-mannuronate)	lyase	[EC:4.2.2.3]
D	lcl|SIZZ01000001.1_prot_TBR40441.1_1941;	K01623	ALDO;	fructose-bisphosphate	aldolase,	class	I	[EC:4.1.2.13]
D	lcl|SIZZ01000001.1_prot_TBR39833.1_1273;	K11645	fbaB;	fructose-bisphosphate	aldolase,	class	I	[EC:4.1.2.13]
D	lcl|SIZZ01000001.1_prot_TBR39599.1_1019;	K01803	TPI,	tpiA;	triosephosphate	isomerase	(TIM)	[EC:5.3.1.1]
D	lcl|SIZZ01000002.1_prot_TBR37126.1_2893;	K02793	manXa;	mannose	PTS	system	EIIA	component	[EC:2.7.1.191]
D	lcl|SIZZ01000002.1_prot_TBR36616.1_2331;	K19270	hxpA;	mannitol-1-/sugar-/sorbitol-6-phosphatase	[EC:3.1.3.22	3.1.3.23	3.1.3.50]
C	52	Galactose	metabolism	[PATH:ko00052]
D	lcl|SIZZ01000003.1_prot_TBR36031.1_3066;	K01785	galM,	GALM;	aldose	1-epimerase	[EC:5.1.3.3]
D	lcl|SIZZ01000002.1_prot_TBR36731.1_2463;	K01784	galE,	GALE;	UDP-glucose	4-epimerase	[EC:5.1.3.2]
D	lcl|SIZZ01000003.1_prot_TBR36144.1_3200;	K01784	galE,	GALE;	UDP-glucose	4-epimerase	[EC:5.1.3.2]
D	lcl|SIZZ01000001.1_prot_TBR39309.1_693;	K00963	UGP2,	galU,	galF;	UTP--glucose-1-phosphate	uridylyltransferase	[EC:2.7.7.9]
D	lcl|SIZZ01000004.1_prot_TBR35784.1_3443;	K15778	pmm-pgm;	phosphomannomutase	/	phosphoglucomutase	[EC:5.4.2.8	5.4.2.2]
D	lcl|SIZZ01000002.1_prot_TBR36645.1_2362;	K00845	glk;	glucokinase	[EC:2.7.1.2]
D	lcl|SIZZ01000003.1_prot_TBR36126.1_3176;	K00845	glk;	glucokinase	[EC:2.7.1.2]
D	lcl|SIZZ01000001.1_prot_TBR40144.1_1613;	K01854	glf;	UDP-galactopyranose	mutase	[EC:5.4.99.9]
D	lcl|SIZZ01000003.1_prot_TBR36346.1_3420;	K21071	pfk,	pfp;	ATP-dependent	phosphofructokinase	/	diphosphate-dependent	phosphofructokinase	[EC:2.7.1.11	2.7.1.90]
D	lcl|SIZZ01000001.1_prot_TBR39736.1_1166;	K01187	malZ;	alpha-glucosidase	[EC:3.2.1.20]
D	lcl|SIZZ01000002.1_prot_TBR36733.1_2465;	K01187	malZ;	alpha-glucosidase	[EC:3.2.1.20]
D	lcl|SIZZ01000002.1_prot_TBR36735.1_2468;	K01187	malZ;	alpha-glucosidase	[EC:3.2.1.20]
D	lcl|SIZZ01000001.1_prot_TBR39832.1_1272;	K02082	agaS;	D-galactosamine	6-phosphate	deaminase/isomerase	[EC:3.5.99.-]
C	53	Ascorbate	and	aldarate	metabolism	[PATH:ko00053]
D	lcl|SIZZ01000001.1_prot_TBR39674.1_1098;	K00012	UGDH,	ugd;	UDPglucose	6-dehydrogenase	[EC:1.1.1.22]
D	lcl|SIZZ01000001.1_prot_TBR40090.1_1550;	K08679	GAE,	cap1J;	UDP-glucuronate	4-epimerase	[EC:5.1.3.6]
D	lcl|SIZZ01000003.1_prot_TBR36190.1_3249;	K08679	GAE,	cap1J;	UDP-glucuronate	4-epimerase	[EC:5.1.3.6]
D	lcl|SIZZ01000004.1_prot_TBR35960.1_3631;	K00128	ALDH;	aldehyde	dehydrogenase	(NAD+)	[EC:1.2.1.3]
D	lcl|SIZZ01000001.1_prot_TBR39704.1_1131;	K14085	ALDH7A1;	aldehyde	dehydrogenase	family	7	member	A1	[EC:1.2.1.31	1.2.1.8	1.2.1.3]
C	500	Starch	and	sucrose	metabolism	[PATH:ko00500]
D	lcl|SIZZ01000001.1_prot_TBR39736.1_1166;	K01187	malZ;	alpha-glucosidase	[EC:3.2.1.20]
D	lcl|SIZZ01000002.1_prot_TBR36733.1_2465;	K01187	malZ;	alpha-glucosidase	[EC:3.2.1.20]
D	lcl|SIZZ01000002.1_prot_TBR36735.1_2468;	K01187	malZ;	alpha-glucosidase	[EC:3.2.1.20]
D	lcl|SIZZ01000001.1_prot_TBR39309.1_693;	K00963	UGP2,	galU,	galF;	UTP--glucose-1-phosphate	uridylyltransferase	[EC:2.7.7.9]
D	lcl|SIZZ01000001.1_prot_TBR38916.1_258;	K01513	ENPP1_3,	CD203;	ectonucleotide	pyrophosphatase/phosphodiesterase	family	member	2022-01-03	[EC:3.1.4.1	3.6.1.9]
D	lcl|SIZZ01000001.1_prot_TBR39355.1_743;	K00694	bcsA;	cellulose	synthase	(UDP-forming)	[EC:2.4.1.12]
D	lcl|SIZZ01000002.1_prot_TBR36646.1_2363;	K01223	E3.2.1.86B,	bglA;	6-phospho-beta-glucosidase	[EC:3.2.1.86]
D	lcl|SIZZ01000002.1_prot_TBR37303.1_2467;	K01176	AMY,	amyA,	malS;	alpha-amylase	[EC:3.2.1.1]
D	lcl|SIZZ01000002.1_prot_TBR36738.1_2471;	K01176	AMY,	amyA,	malS;	alpha-amylase	[EC:3.2.1.1]
D	lcl|SIZZ01000002.1_prot_TBR37327.1_2792;	K00697	otsA;	trehalose	6-phosphate	synthase	[EC:2.4.1.15	2.4.1.347]
D	lcl|SIZZ01000002.1_prot_TBR37037.1_2794;	K01087	otsB;	trehalose	6-phosphate	phosphatase	[EC:3.1.3.12]
D	lcl|SIZZ01000002.1_prot_TBR37036.1_2793;	K22934	E3.2.1.28;	alpha,alpha-trehalase	[EC:3.2.1.28]
D	lcl|SIZZ01000004.1_prot_TBR35784.1_3443;	K15778	pmm-pgm;	phosphomannomutase	/	phosphoglucomutase	[EC:5.4.2.8	5.4.2.2]
D	lcl|SIZZ01000002.1_prot_TBR36645.1_2362;	K00845	glk;	glucokinase	[EC:2.7.1.2]
D	lcl|SIZZ01000003.1_prot_TBR36126.1_3176;	K00845	glk;	glucokinase	[EC:2.7.1.2]
D	lcl|SIZZ01000001.1_prot_TBR39015.1_368;	K01810	GPI,	pgi;	glucose-6-phosphate	isomerase	[EC:5.3.1.9]
D	lcl|SIZZ01000002.1_prot_TBR37017.1_2772;	K00847	E2.7.1.4,	scrK;	fructokinase	[EC:2.7.1.4]
C	520	Amino	sugar	and	nucleotide	sugar	metabolism	[PATH:ko00520]
D	lcl|SIZZ01000001.1_prot_TBR39550.1_964;	K01183	E3.2.1.14;	chitinase	[EC:3.2.1.14]
D	lcl|SIZZ01000001.1_prot_TBR39655.1_1078;	K01207	nagZ;	beta-N-acetylhexosaminidase	[EC:3.2.1.52]
D	lcl|SIZZ01000003.1_prot_TBR36374.1_3178;	K12373	HEXA_B;	hexosaminidase	[EC:3.2.1.52]
D	lcl|SIZZ01000003.1_prot_TBR36123.1_3172;	K01443	nagA,	AMDHD2;	N-acetylglucosamine-6-phosphate	deacetylase	[EC:3.5.1.25]
D	lcl|SIZZ01000002.1_prot_TBR37017.1_2772;	K00847	E2.7.1.4,	scrK;	fructokinase	[EC:2.7.1.4]
D	lcl|SIZZ01000001.1_prot_TBR40373.1_1864;	K00820	glmS,	GFPT;	glutamine---fructose-6-phosphate	transaminase	(isomerizing)	[EC:2.6.1.16]
D	lcl|SIZZ01000003.1_prot_TBR36124.1_3173;	K00820	glmS,	GFPT;	glutamine---fructose-6-phosphate	transaminase	(isomerizing)	[EC:2.6.1.16]
D	lcl|SIZZ01000001.1_prot_TBR39602.1_1022;	K03431	glmM;	phosphoglucosamine	mutase	[EC:5.4.2.10]
D	lcl|SIZZ01000002.1_prot_TBR37280.1_2249;	K04042	glmU;	bifunctional	UDP-N-acetylglucosamine	pyrophosphorylase	/	glucosamine-1-phosphate	N-acetyltransferase	[EC:2.7.7.23	2.3.1.157]
D	lcl|SIZZ01000004.1_prot_TBR35778.1_3436;	K09001	anmK;	anhydro-N-acetylmuramic	acid	kinase	[EC:2.7.1.170]
D	lcl|SIZZ01000001.1_prot_TBR39922.1_1366;	K22292	mupP;	N-acetyl-D-muramate	6-phosphate	phosphatase	[EC:3.1.3.105]
D	lcl|SIZZ01000001.1_prot_TBR40054.1_1511;	K07102	amgK;	N-acetylmuramate	1-kinase	[EC:2.7.1.221]
D	lcl|SIZZ01000001.1_prot_TBR40055.1_1512;	K00992	murU;	N-acetyl-alpha-D-muramate	1-phosphate	uridylyltransferase	[EC:2.7.7.99]
D	lcl|SIZZ01000002.1_prot_TBR37137.1_2904;	K00790	murA;	UDP-N-acetylglucosamine	1-carboxyvinyltransferase	[EC:2.5.1.7]
D	lcl|SIZZ01000001.1_prot_TBR40710.1_1135;	K00075	murB;	UDP-N-acetylmuramate	dehydrogenase	[EC:1.3.1.98]
D	lcl|SIZZ01000001.1_prot_TBR40053.1_1510;	K13015	wbpA;	UDP-N-acetyl-D-glucosamine	dehydrogenase	[EC:1.1.1.136]
D	lcl|SIZZ01000003.1_prot_TBR36191.1_3250;	K22926	tviB,	vipA;	UDP-N-acetylglucosamine	6-dehydrogenase	[EC:1.1.1.136]
D	lcl|SIZZ01000001.1_prot_TBR39471.1_877;	K13017	wbpE,	wlbC;	UDP-2-acetamido-2-deoxy-ribo-hexuluronate	aminotransferase	[EC:2.6.1.98]
D	lcl|SIZZ01000002.1_prot_TBR36645.1_2362;	K00845	glk;	glucokinase	[EC:2.7.1.2]
D	lcl|SIZZ01000003.1_prot_TBR36126.1_3176;	K00845	glk;	glucokinase	[EC:2.7.1.2]
D	lcl|SIZZ01000004.1_prot_TBR35784.1_3443;	K15778	pmm-pgm;	phosphomannomutase	/	phosphoglucomutase	[EC:5.4.2.8	5.4.2.2]
D	lcl|SIZZ01000001.1_prot_TBR39309.1_693;	K00963	UGP2,	galU,	galF;	UTP--glucose-1-phosphate	uridylyltransferase	[EC:2.7.7.9]
D	lcl|SIZZ01000001.1_prot_TBR39674.1_1098;	K00012	UGDH,	ugd;	UDPglucose	6-dehydrogenase	[EC:1.1.1.22]
D	lcl|SIZZ01000002.1_prot_TBR36731.1_2463;	K01784	galE,	GALE;	UDP-glucose	4-epimerase	[EC:5.1.3.2]
D	lcl|SIZZ01000003.1_prot_TBR36144.1_3200;	K01784	galE,	GALE;	UDP-glucose	4-epimerase	[EC:5.1.3.2]
D	lcl|SIZZ01000001.1_prot_TBR40144.1_1613;	K01854	glf;	UDP-galactopyranose	mutase	[EC:5.4.99.9]
D	lcl|SIZZ01000001.1_prot_TBR40090.1_1550;	K08679	GAE,	cap1J;	UDP-glucuronate	4-epimerase	[EC:5.1.3.6]
D	lcl|SIZZ01000003.1_prot_TBR36190.1_3249;	K08679	GAE,	cap1J;	UDP-glucuronate	4-epimerase	[EC:5.1.3.6]
D	lcl|SIZZ01000002.1_prot_TBR37126.1_2893;	K02793	manXa;	mannose	PTS	system	EIIA	component	[EC:2.7.1.191]
D	lcl|SIZZ01000001.1_prot_TBR39015.1_368;	K01810	GPI,	pgi;	glucose-6-phosphate	isomerase	[EC:5.3.1.9]
D	lcl|SIZZ01000001.1_prot_TBR40361.1_1850;	K00966	GMPP;	mannose-1-phosphate	guanylyltransferase	[EC:2.7.7.13]
D	lcl|SIZZ01000001.1_prot_TBR40684.1_840;	K00971	manC,	cpsB;	mannose-1-phosphate	guanylyltransferase	[EC:2.7.7.13]
D	lcl|SIZZ01000001.1_prot_TBR40371.1_1862;	K16011	algA,	xanB,	rfbA,	wbpW,	pslB;	mannose-1-phosphate	guanylyltransferase	/	mannose-6-phosphate	isomerase	[EC:2.7.7.13	5.3.1.8]
D	lcl|SIZZ01000001.1_prot_TBR39440.1_841;	K00066	algD;	GDP-mannose	6-dehydrogenase	[EC:1.1.1.132]
D	lcl|SIZZ01000002.1_prot_TBR36712.1_2441;	K00523	ascD,	ddhD,	rfbI;	CDP-4-dehydro-6-deoxyglucose	reductase,	E3	[EC:1.17.1.1]
C	620	Pyruvate	metabolism	[PATH:ko00620]
D	lcl|SIZZ01000004.1_prot_TBR35860.1_3525;	K01895	ACSS1_2,	acs;	acetyl-CoA	synthetase	[EC:6.2.1.1]
D	lcl|SIZZ01000001.1_prot_TBR39427.1_825;	K00163	aceE;	pyruvate	dehydrogenase	E1	component	[EC:1.2.4.1]
D	lcl|SIZZ01000002.1_prot_TBR36781.1_2518;	K00163	aceE;	pyruvate	dehydrogenase	E1	component	[EC:1.2.4.1]
D	lcl|SIZZ01000002.1_prot_TBR36802.1_2542;	K00627	DLAT,	aceF,	pdhC;	pyruvate	dehydrogenase	E2	component	(dihydrolipoamide	acetyltransferase)	[EC:2.3.1.12]
D	lcl|SIZZ01000001.1_prot_TBR39232.1_604;	K00382	DLD,	lpd,	pdhD;	dihydrolipoamide	dehydrogenase	[EC:1.8.1.4]
D	lcl|SIZZ01000002.1_prot_TBR36803.1_2543;	K00382	DLD,	lpd,	pdhD;	dihydrolipoamide	dehydrogenase	[EC:1.8.1.4]
D	lcl|SIZZ01000001.1_prot_TBR39490.1_897;	K13953	adhP;	alcohol	dehydrogenase,	propanol-preferring	[EC:1.1.1.1]
D	lcl|SIZZ01000002.1_prot_TBR36688.1_2414;	K13953	adhP;	alcohol	dehydrogenase,	propanol-preferring	[EC:1.1.1.1]
D	lcl|SIZZ01000002.1_prot_TBR36631.1_2346;	K00121	frmA,	ADH5,	adhC;	S-(hydroxymethyl)glutathione	dehydrogenase	/	alcohol	dehydrogenase	[EC:1.1.1.284	1.1.1.1]
D	lcl|SIZZ01000001.1_prot_TBR39078.1_438;	K13979	yahK;	alcohol	dehydrogenase	(NADP+)	[EC:1.1.1.2]
D	lcl|SIZZ01000001.1_prot_TBR40614.1_2127;	K22474	adhB;	alcohol	dehydrogenase	(quinone),	cytochrome	c	subunit	[EC:1.1.5.5]
D	lcl|SIZZ01000001.1_prot_TBR40443.1_1943;	K00873	PK,	pyk;	pyruvate	kinase	[EC:2.7.1.40]
D	lcl|SIZZ01000001.1_prot_TBR38746.1_72;	K01962	accA;	acetyl-CoA	carboxylase	carboxyl	transferase	subunit	alpha	[EC:6.4.1.2	2.1.3.15]
D	lcl|SIZZ01000002.1_prot_TBR36763.1_2499;	K02160	accB,	bccP;	acetyl-CoA	carboxylase	biotin	carboxyl	carrier	protein
D	lcl|SIZZ01000002.1_prot_TBR37306.1_2498;	K01961	accC;	acetyl-CoA	carboxylase,	biotin	carboxylase	subunit	[EC:6.4.1.2	6.3.4.14]
D	lcl|SIZZ01000001.1_prot_TBR38889.1_231;	K01963	accD;	acetyl-CoA	carboxylase	carboxyl	transferase	subunit	beta	[EC:6.4.1.2	2.1.3.15]
D	lcl|SIZZ01000002.1_prot_TBR37257.1_3031;	K01512	acyP;	acylphosphatase	[EC:3.6.1.7]
D	lcl|SIZZ01000004.1_prot_TBR35960.1_3631;	K00128	ALDH;	aldehyde	dehydrogenase	(NAD+)	[EC:1.2.1.3]
D	lcl|SIZZ01000001.1_prot_TBR39704.1_1131;	K14085	ALDH7A1;	aldehyde	dehydrogenase	family	7	member	A1	[EC:1.2.1.31	1.2.1.8	1.2.1.3]
D	lcl|SIZZ01000001.1_prot_TBR39973.1_1420;	K18118	aarC,	cat1;	succinyl-CoA:acetate	CoA-transferase	[EC:2.8.3.18]
D	lcl|SIZZ01000003.1_prot_TBR36351.1_3425;	K01759	GLO1,	gloA;	lactoylglutathione	lyase	[EC:4.4.1.5]
D	lcl|SIZZ01000001.1_prot_TBR39685.1_1110;	K01069	gloB,	gloC,	HAGH;	hydroxyacylglutathione	hydrolase	[EC:3.1.2.6]
D	lcl|SIZZ01000002.1_prot_TBR36780.1_2517;	K00029	E1.1.1.40,	maeB;	malate	dehydrogenase	(oxaloacetate-decarboxylating)(NADP+)	[EC:1.1.1.40]
D	lcl|SIZZ01000001.1_prot_TBR39878.1_1320;	K00024	mdh;	malate	dehydrogenase	[EC:1.1.1.37]
D	lcl|SIZZ01000002.1_prot_TBR37335.1_2862;	K01676	E4.2.1.2A,	fumA,	fumB;	fumarate	hydratase,	class	I	[EC:4.2.1.2]
D	lcl|SIZZ01000001.1_prot_TBR39245.1_617;	K01679	E4.2.1.2B,	fumC,	FH;	fumarate	hydratase,	class	II	[EC:4.2.1.2]
D	lcl|SIZZ01000002.1_prot_TBR36939.1_2691;	K01595	ppc;	phosphoenolpyruvate	carboxylase	[EC:4.1.1.31]
D	lcl|SIZZ01000001.1_prot_TBR40323.1_1811;	K01596	E4.1.1.32,	pckA,	PCK;	phosphoenolpyruvate	carboxykinase	(GTP)	[EC:4.1.1.32]
D	lcl|SIZZ01000001.1_prot_TBR39679.1_1103;	K01007	pps,	ppsA;	pyruvate,	water	dikinase	[EC:2.7.9.2]
D	lcl|SIZZ01000002.1_prot_TBR36561.1_2273;	K01638	aceB,	glcB;	malate	synthase	[EC:2.3.3.9]
D	lcl|SIZZ01000001.1_prot_TBR39812.1_1251;	K00626	ACAT,	atoB;	acetyl-CoA	C-acetyltransferase	[EC:2.3.1.9]
D	lcl|SIZZ01000003.1_prot_TBR36102.1_3147;	K00626	ACAT,	atoB;	acetyl-CoA	C-acetyltransferase	[EC:2.3.1.9]
D	lcl|SIZZ01000003.1_prot_TBR36115.1_3161;	K01649	leuA,	IMS;	2-isopropylmalate	synthase	[EC:2.3.3.13]
C	630	Glyoxylate	and	dicarboxylate	metabolism	[PATH:ko00630]
D	lcl|SIZZ01000002.1_prot_TBR36560.1_2272;	K01637	E4.1.3.1,	aceA;	isocitrate	lyase	[EC:4.1.3.1]
D	lcl|SIZZ01000004.1_prot_TBR35860.1_3525;	K01895	ACSS1_2,	acs;	acetyl-CoA	synthetase	[EC:6.2.1.1]
D	lcl|SIZZ01000002.1_prot_TBR36561.1_2273;	K01638	aceB,	glcB;	malate	synthase	[EC:2.3.3.9]
D	lcl|SIZZ01000001.1_prot_TBR39878.1_1320;	K00024	mdh;	malate	dehydrogenase	[EC:1.1.1.37]
D	lcl|SIZZ01000002.1_prot_TBR36882.1_2627;	K01647	CS,	gltA;	citrate	synthase	[EC:2.3.3.1]
D	lcl|SIZZ01000001.1_prot_TBR39575.1_991;	K01681	ACO,	acnA;	aconitate	hydratase	[EC:4.2.1.3]
D	lcl|SIZZ01000001.1_prot_TBR40699.1_990;	K01682	acnB;	aconitate	hydratase	2	/	2-methylisocitrate	dehydratase	[EC:4.2.1.3	4.2.1.99]
D	lcl|SIZZ01000001.1_prot_TBR39812.1_1251;	K00626	ACAT,	atoB;	acetyl-CoA	C-acetyltransferase	[EC:2.3.1.9]
D	lcl|SIZZ01000003.1_prot_TBR36102.1_3147;	K00626	ACAT,	atoB;	acetyl-CoA	C-acetyltransferase	[EC:2.3.1.9]
D	lcl|SIZZ01000001.1_prot_TBR38973.1_323;	K00023	phbB;	acetoacetyl-CoA	reductase	[EC:1.1.1.36]
D	lcl|SIZZ01000001.1_prot_TBR39150.1_513;	K00023	phbB;	acetoacetyl-CoA	reductase	[EC:1.1.1.36]
D	lcl|SIZZ01000001.1_prot_TBR39782.1_1216;	K01848	E5.4.99.2A,	mcmA1;	methylmalonyl-CoA	mutase,	N-terminal	domain	[EC:5.4.99.2]
D	lcl|SIZZ01000001.1_prot_TBR40401.1_1898;	K00104	glcD;	glycolate	oxidase	[EC:1.1.3.15]
D	lcl|SIZZ01000002.1_prot_TBR36845.1_2588;	K11473	glcF;	glycolate	oxidase	iron-sulfur	subunit
D	lcl|SIZZ01000001.1_prot_TBR38880.1_222;	K00015	gyaR,	GOR1;	glyoxylate	reductase	[EC:1.1.1.26]
D	lcl|SIZZ01000001.1_prot_TBR40381.1_1873;	K01091	gph;	phosphoglycolate	phosphatase	[EC:3.1.3.18]
D	lcl|SIZZ01000004.1_prot_TBR35804.1_3465;	K01915	glnA,	GLUL;	glutamine	synthetase	[EC:6.3.1.2]
D	lcl|SIZZ01000001.1_prot_TBR40257.1_1738;	K00600	glyA,	SHMT;	glycine	hydroxymethyltransferase	[EC:2.1.2.1]
D	lcl|SIZZ01000001.1_prot_TBR38840.1_176;	K00281	GLDC,	gcvP;	glycine	dehydrogenase	[EC:1.4.4.2]
D	lcl|SIZZ01000001.1_prot_TBR40341.1_1830;	K00605	gcvT,	AMT;	aminomethyltransferase	[EC:2.1.2.10]
D	lcl|SIZZ01000001.1_prot_TBR39232.1_604;	K00382	DLD,	lpd,	pdhD;	dihydrolipoamide	dehydrogenase	[EC:1.8.1.4]
D	lcl|SIZZ01000002.1_prot_TBR36803.1_2543;	K00382	DLD,	lpd,	pdhD;	dihydrolipoamide	dehydrogenase	[EC:1.8.1.4]
D	lcl|SIZZ01000001.1_prot_TBR40340.1_1829;	K02437	gcvH,	GCSH;	glycine	cleavage	system	H	protein
D	lcl|SIZZ01000001.1_prot_TBR40205.1_1681;	K15918	GLYK;	D-glycerate	3-kinase	[EC:2.7.1.31]
D	lcl|SIZZ01000004.1_prot_TBR35952.1_3621;	K01625	eda;	2-dehydro-3-deoxyphosphogluconate	aldolase	/	(4S)-4-hydroxy-2-oxoglutarate	aldolase	[EC:4.1.2.14	4.1.3.42]
D	lcl|SIZZ01000001.1_prot_TBR39948.1_1395;	K01458	hutG;	N-formylglutamate	deformylase	[EC:3.5.1.68]
C	640	Propanoate	metabolism	[PATH:ko00640]
D	lcl|SIZZ01000004.1_prot_TBR35860.1_3525;	K01895	ACSS1_2,	acs;	acetyl-CoA	synthetase	[EC:6.2.1.1]
D	lcl|SIZZ01000001.1_prot_TBR39877.1_1319;	K01908	ACSS3,	prpE;	propionyl-CoA	synthetase	[EC:6.2.1.17]
D	lcl|SIZZ01000001.1_prot_TBR40456.1_1957;	K00166	BCKDHA,	bkdA1;	2-oxoisovalerate	dehydrogenase	E1	component	alpha	subunit	[EC:1.2.4.4]
D	lcl|SIZZ01000001.1_prot_TBR40457.1_1958;	K00167	BCKDHB,	bkdA2;	2-oxoisovalerate	dehydrogenase	E1	component	beta	subunit	[EC:1.2.4.4]
D	lcl|SIZZ01000001.1_prot_TBR39428.1_826;	K09699	DBT,	bkdB;	2-oxoisovalerate	dehydrogenase	E2	component	(dihydrolipoyl	transacylase)	[EC:2.3.1.168]
D	lcl|SIZZ01000001.1_prot_TBR40458.1_1959;	K09699	DBT,	bkdB;	2-oxoisovalerate	dehydrogenase	E2	component	(dihydrolipoyl	transacylase)	[EC:2.3.1.168]
D	lcl|SIZZ01000001.1_prot_TBR39232.1_604;	K00382	DLD,	lpd,	pdhD;	dihydrolipoamide	dehydrogenase	[EC:1.8.1.4]
D	lcl|SIZZ01000002.1_prot_TBR36803.1_2543;	K00382	DLD,	lpd,	pdhD;	dihydrolipoamide	dehydrogenase	[EC:1.8.1.4]
D	lcl|SIZZ01000001.1_prot_TBR39726.1_1154;	K00248	ACADS,	bcd;	butyryl-CoA	dehydrogenase	[EC:1.3.8.1]
D	lcl|SIZZ01000001.1_prot_TBR39230.1_602;	K19745	acuI;	acrylyl-CoA	reductase	(NADPH)	[EC:1.3.1.-]
D	lcl|SIZZ01000001.1_prot_TBR39671.1_1095;	K01782	fadJ;	3-hydroxyacyl-CoA	dehydrogenase	/	enoyl-CoA	hydratase	/	3-hydroxybutyryl-CoA	epimerase	[EC:1.1.1.35	4.2.1.17	5.1.2.3]
D	lcl|SIZZ01000001.1_prot_TBR38746.1_72;	K01962	accA;	acetyl-CoA	carboxylase	carboxyl	transferase	subunit	alpha	[EC:6.4.1.2	2.1.3.15]
D	lcl|SIZZ01000002.1_prot_TBR36763.1_2499;	K02160	accB,	bccP;	acetyl-CoA	carboxylase	biotin	carboxyl	carrier	protein
D	lcl|SIZZ01000002.1_prot_TBR37306.1_2498;	K01961	accC;	acetyl-CoA	carboxylase,	biotin	carboxylase	subunit	[EC:6.4.1.2	6.3.4.14]
D	lcl|SIZZ01000001.1_prot_TBR38889.1_231;	K01963	accD;	acetyl-CoA	carboxylase	carboxyl	transferase	subunit	beta	[EC:6.4.1.2	2.1.3.15]
D	lcl|SIZZ01000001.1_prot_TBR40035.1_1488;	K00823	puuE;	4-aminobutyrate	aminotransferase	[EC:2.6.1.19]
D	lcl|SIZZ01000001.1_prot_TBR39782.1_1216;	K01848	E5.4.99.2A,	mcmA1;	methylmalonyl-CoA	mutase,	N-terminal	domain	[EC:5.4.99.2]
D	lcl|SIZZ01000002.1_prot_TBR37025.1_2781;	K01903	sucC;	succinyl-CoA	synthetase	beta	subunit	[EC:6.2.1.5]
D	lcl|SIZZ01000002.1_prot_TBR37026.1_2782;	K01902	sucD;	succinyl-CoA	synthetase	alpha	subunit	[EC:6.2.1.5]
D	lcl|SIZZ01000001.1_prot_TBR39872.1_1314;	K01659	prpC;	2-methylcitrate	synthase	[EC:2.3.3.5]
D	lcl|SIZZ01000001.1_prot_TBR39864.1_1304;	K01720	prpD;	2-methylcitrate	dehydratase	[EC:4.2.1.79]
D	lcl|SIZZ01000001.1_prot_TBR39866.1_1306;	K20455	acnD;	2-methylcitrate	dehydratase	(2-methyl-trans-aconitate	forming)	[EC:4.2.1.117]
D	lcl|SIZZ01000001.1_prot_TBR39865.1_1305;	K09788	prpF;	2-methylaconitate	isomerase	[EC:5.3.3.-]
D	lcl|SIZZ01000001.1_prot_TBR40699.1_990;	K01682	acnB;	aconitate	hydratase	2	/	2-methylisocitrate	dehydratase	[EC:4.2.1.3	4.2.1.99]
D	lcl|SIZZ01000001.1_prot_TBR39873.1_1315;	K03417	prpB;	methylisocitrate	lyase	[EC:4.1.3.30]
D	lcl|SIZZ01000003.1_prot_TBR36366.1_3123;	K01734	mgsA;	methylglyoxal	synthase	[EC:4.2.3.3]
C	650	Butanoate	metabolism	[PATH:ko00650]
D	lcl|SIZZ01000001.1_prot_TBR39812.1_1251;	K00626	ACAT,	atoB;	acetyl-CoA	C-acetyltransferase	[EC:2.3.1.9]
D	lcl|SIZZ01000003.1_prot_TBR36102.1_3147;	K00626	ACAT,	atoB;	acetyl-CoA	C-acetyltransferase	[EC:2.3.1.9]
D	lcl|SIZZ01000001.1_prot_TBR39317.1_702;	K07516	fadN;	3-hydroxyacyl-CoA	dehydrogenase	[EC:1.1.1.35]
D	lcl|SIZZ01000001.1_prot_TBR39671.1_1095;	K01782	fadJ;	3-hydroxyacyl-CoA	dehydrogenase	/	enoyl-CoA	hydratase	/	3-hydroxybutyryl-CoA	epimerase	[EC:1.1.1.35	4.2.1.17	5.1.2.3]
D	lcl|SIZZ01000001.1_prot_TBR39021.1_375;	K01715	crt;	enoyl-CoA	hydratase	[EC:4.2.1.17]
D	lcl|SIZZ01000001.1_prot_TBR39726.1_1154;	K00248	ACADS,	bcd;	butyryl-CoA	dehydrogenase	[EC:1.3.8.1]
D	lcl|SIZZ01000001.1_prot_TBR39414.1_811;	K00209	fabV,	ter;	enoyl-[acyl-carrier	protein]	reductase	/	trans-2-enoyl-CoA	reductase	(NAD+)	[EC:1.3.1.9	1.3.1.44]
D	lcl|SIZZ01000001.1_prot_TBR39221.1_593;	K03821	phaC,	phbC;	poly[(R)-3-hydroxyalkanoate]	polymerase	subunit	PhaC	[EC:2.3.1.304]
D	lcl|SIZZ01000001.1_prot_TBR39220.1_592;	K22881	phaE;	poly[(R)-3-hydroxyalkanoate]	polymerase	subunit	PhaE
D	lcl|SIZZ01000001.1_prot_TBR40284.1_1770;	K05973	phaZ;	poly(3-hydroxybutyrate)	depolymerase	[EC:3.1.1.75]
D	lcl|SIZZ01000001.1_prot_TBR38973.1_323;	K00023	phbB;	acetoacetyl-CoA	reductase	[EC:1.1.1.36]
D	lcl|SIZZ01000001.1_prot_TBR39150.1_513;	K00023	phbB;	acetoacetyl-CoA	reductase	[EC:1.1.1.36]
D	lcl|SIZZ01000001.1_prot_TBR39160.1_527;	K00239	sdhA,	frdA;	succinate	dehydrogenase	/	fumarate	reductase,	flavoprotein	subunit	[EC:1.3.5.1	1.3.5.4]
D	lcl|SIZZ01000001.1_prot_TBR39161.1_528;	K00240	sdhB,	frdB;	succinate	dehydrogenase	/	fumarate	reductase,	iron-sulfur	subunit	[EC:1.3.5.1	1.3.5.4]
D	lcl|SIZZ01000001.1_prot_TBR39158.1_525;	K00241	sdhC,	frdC;	succinate	dehydrogenase	/	fumarate	reductase,	cytochrome	b	subunit
D	lcl|SIZZ01000001.1_prot_TBR39159.1_526;	K00242	sdhD,	frdD;	succinate	dehydrogenase	/	fumarate	reductase,	membrane	anchor	subunit
D	lcl|SIZZ01000001.1_prot_TBR40035.1_1488;	K00823	puuE;	4-aminobutyrate	aminotransferase	[EC:2.6.1.19]
D	lcl|SIZZ01000001.1_prot_TBR39973.1_1420;	K18118	aarC,	cat1;	succinyl-CoA:acetate	CoA-transferase	[EC:2.8.3.18]
D	lcl|SIZZ01000001.1_prot_TBR39823.1_1263;	K01640	HMGCL,	hmgL;	hydroxymethylglutaryl-CoA	lyase	[EC:4.1.3.4]
D	lcl|SIZZ01000001.1_prot_TBR40168.1_1641;	K01027	OXCT;	3-oxoacid	CoA-transferase	[EC:2.8.3.5]
D	lcl|SIZZ01000004.1_prot_TBR35792.1_3452;	K00019	BDH,	bdhA;	3-hydroxybutyrate	dehydrogenase	[EC:1.1.1.30]
D	lcl|SIZZ01000001.1_prot_TBR39081.1_441;	K01652	E2.2.1.6L,	ilvB,	ilvG,	ilvI;	acetolactate	synthase	I/II/III	large	subunit	[EC:2.2.1.6]
D	lcl|SIZZ01000003.1_prot_TBR36369.1_3154;	K01652	E2.2.1.6L,	ilvB,	ilvG,	ilvI;	acetolactate	synthase	I/II/III	large	subunit	[EC:2.2.1.6]
D	lcl|SIZZ01000003.1_prot_TBR36108.1_3153;	K01653	E2.2.1.6S,	ilvH,	ilvN;	acetolactate	synthase	I/III	small	subunit	[EC:2.2.1.6]
C	660	C5-Branched	dibasic	acid	metabolism	[PATH:ko00660]
D	lcl|SIZZ01000001.1_prot_TBR39081.1_441;	K01652	E2.2.1.6L,	ilvB,	ilvG,	ilvI;	acetolactate	synthase	I/II/III	large	subunit	[EC:2.2.1.6]
D	lcl|SIZZ01000003.1_prot_TBR36369.1_3154;	K01652	E2.2.1.6L,	ilvB,	ilvG,	ilvI;	acetolactate	synthase	I/II/III	large	subunit	[EC:2.2.1.6]
D	lcl|SIZZ01000003.1_prot_TBR36108.1_3153;	K01653	E2.2.1.6S,	ilvH,	ilvN;	acetolactate	synthase	I/III	small	subunit	[EC:2.2.1.6]
D	lcl|SIZZ01000002.1_prot_TBR37025.1_2781;	K01903	sucC;	succinyl-CoA	synthetase	beta	subunit	[EC:6.2.1.5]
D	lcl|SIZZ01000002.1_prot_TBR37026.1_2782;	K01902	sucD;	succinyl-CoA	synthetase	alpha	subunit	[EC:6.2.1.5]
D	lcl|SIZZ01000003.1_prot_TBR36113.1_3159;	K01703	leuC,	IPMI-L;	3-isopropylmalate/(R)-2-methylmalate	dehydratase	large	subunit	[EC:4.2.1.33	4.2.1.35]
D	lcl|SIZZ01000003.1_prot_TBR36112.1_3158;	K01704	leuD,	IPMI-S;	3-isopropylmalate/(R)-2-methylmalate	dehydratase	small	subunit	[EC:4.2.1.33	4.2.1.35]
D	lcl|SIZZ01000003.1_prot_TBR36111.1_3157;	K00052	leuB,	IMDH;	3-isopropylmalate	dehydrogenase	[EC:1.1.1.85]
C	562	Inositol	phosphate	metabolism	[PATH:ko00562]
D	lcl|SIZZ01000002.1_prot_TBR37144.1_2912;	K01092	E3.1.3.25,	IMPA,	suhB;	myo-inositol-1(or	4)-monophosphatase	[EC:3.1.3.25]
D	lcl|SIZZ01000001.1_prot_TBR39599.1_1019;	K01803	TPI,	tpiA;	triosephosphate	isomerase	(TIM)	[EC:5.3.1.1]
B
B	9102	Energy	metabolism
C	190	Oxidative	phosphorylation	[PATH:ko00190]
D	lcl|SIZZ01000001.1_prot_TBR40667.1_571;	K00330	nuoA;	NADH-quinone	oxidoreductase	subunit	A	[EC:7.1.1.2]
D	lcl|SIZZ01000001.1_prot_TBR39201.1_572;	K00331	nuoB;	NADH-quinone	oxidoreductase	subunit	B	[EC:7.1.1.2]
D	lcl|SIZZ01000001.1_prot_TBR39202.1_573;	K00332	nuoC;	NADH-quinone	oxidoreductase	subunit	C	[EC:7.1.1.2]
D	lcl|SIZZ01000001.1_prot_TBR39203.1_574;	K00333	nuoD;	NADH-quinone	oxidoreductase	subunit	D	[EC:7.1.1.2]
D	lcl|SIZZ01000001.1_prot_TBR39204.1_575;	K00334	nuoE;	NADH-quinone	oxidoreductase	subunit	E	[EC:7.1.1.2]
D	lcl|SIZZ01000001.1_prot_TBR39205.1_576;	K00335	nuoF;	NADH-quinone	oxidoreductase	subunit	F	[EC:7.1.1.2]
D	lcl|SIZZ01000001.1_prot_TBR39206.1_577;	K00336	nuoG;	NADH-quinone	oxidoreductase	subunit	G	[EC:7.1.1.2]
D	lcl|SIZZ01000001.1_prot_TBR39207.1_578;	K00337	nuoH;	NADH-quinone	oxidoreductase	subunit	H	[EC:7.1.1.2]
D	lcl|SIZZ01000001.1_prot_TBR39208.1_579;	K00338	nuoI;	NADH-quinone	oxidoreductase	subunit	I	[EC:7.1.1.2]
D	lcl|SIZZ01000001.1_prot_TBR39209.1_580;	K00339	nuoJ;	NADH-quinone	oxidoreductase	subunit	J	[EC:7.1.1.2]
D	lcl|SIZZ01000001.1_prot_TBR39210.1_581;	K00340	nuoK;	NADH-quinone	oxidoreductase	subunit	K	[EC:7.1.1.2]
D	lcl|SIZZ01000001.1_prot_TBR39211.1_582;	K00341	nuoL;	NADH-quinone	oxidoreductase	subunit	L	[EC:7.1.1.2]
D	lcl|SIZZ01000001.1_prot_TBR39212.1_583;	K00342	nuoM;	NADH-quinone	oxidoreductase	subunit	M	[EC:7.1.1.2]
D	lcl|SIZZ01000001.1_prot_TBR40668.1_584;	K00343	nuoN;	NADH-quinone	oxidoreductase	subunit	N	[EC:7.1.1.2]
D	lcl|SIZZ01000003.1_prot_TBR36249.1_3312;	K03953	NDUFA9;	NADH	dehydrogenase	(ubiquinone)	1	alpha	subcomplex	subunit	9
D	lcl|SIZZ01000003.1_prot_TBR36303.1_3374;	K03885	ndh;	NADH:ubiquinone	reductase	(H+-translocating)	[EC:7.1.1.2]
D	lcl|SIZZ01000001.1_prot_TBR39160.1_527;	K00239	sdhA,	frdA;	succinate	dehydrogenase	/	fumarate	reductase,	flavoprotein	subunit	[EC:1.3.5.1	1.3.5.4]
D	lcl|SIZZ01000001.1_prot_TBR39161.1_528;	K00240	sdhB,	frdB;	succinate	dehydrogenase	/	fumarate	reductase,	iron-sulfur	subunit	[EC:1.3.5.1	1.3.5.4]
D	lcl|SIZZ01000001.1_prot_TBR39158.1_525;	K00241	sdhC,	frdC;	succinate	dehydrogenase	/	fumarate	reductase,	cytochrome	b	subunit
D	lcl|SIZZ01000001.1_prot_TBR39159.1_526;	K00242	sdhD,	frdD;	succinate	dehydrogenase	/	fumarate	reductase,	membrane	anchor	subunit
D	lcl|SIZZ01000001.1_prot_TBR40120.1_1587;	K00411	UQCRFS1,	RIP1,	petA;	ubiquinol-cytochrome	c	reductase	iron-sulfur	subunit	[EC:7.1.1.8]
D	lcl|SIZZ01000001.1_prot_TBR40119.1_1586;	K00412	CYTB,	petB;	ubiquinol-cytochrome	c	reductase	cytochrome	b	subunit
D	lcl|SIZZ01000001.1_prot_TBR40746.1_1585;	K00413	CYC1,	CYT1,	petC;	ubiquinol-cytochrome	c	reductase	cytochrome	c1	subunit
D	lcl|SIZZ01000002.1_prot_TBR36672.1_2393;	K02257	COX10,	ctaB,	cyoE;	heme	o	synthase	[EC:2.5.1.141]
D	lcl|SIZZ01000002.1_prot_TBR36667.1_2388;	K02276	coxC,	ctaE;	cytochrome	c	oxidase	subunit	III	[EC:7.1.1.9]
D	lcl|SIZZ01000002.1_prot_TBR36666.1_2387;	K02274	coxA,	ctaD;	cytochrome	c	oxidase	subunit	I	[EC:7.1.1.9]
D	lcl|SIZZ01000002.1_prot_TBR36665.1_2386;	K02275	coxB,	ctaC;	cytochrome	c	oxidase	subunit	II	[EC:7.1.1.9]
D	lcl|SIZZ01000002.1_prot_TBR36671.1_2392;	K02259	COX15,	ctaA;	heme	a	synthase	[EC:1.17.99.9]
D	lcl|SIZZ01000001.1_prot_TBR39344.1_730;	K00404	ccoN;	cytochrome	c	oxidase	cbb3-type	subunit	I	[EC:7.1.1.9]
D	lcl|SIZZ01000001.1_prot_TBR39639.1_1062;	K00404	ccoN;	cytochrome	c	oxidase	cbb3-type	subunit	I	[EC:7.1.1.9]
D	lcl|SIZZ01000001.1_prot_TBR39343.1_729;	K00405	ccoO;	cytochrome	c	oxidase	cbb3-type	subunit	II
D	lcl|SIZZ01000001.1_prot_TBR39640.1_1063;	K00405	ccoO;	cytochrome	c	oxidase	cbb3-type	subunit	II
D	lcl|SIZZ01000001.1_prot_TBR39341.1_727;	K00406	ccoP;	cytochrome	c	oxidase	cbb3-type	subunit	III
D	lcl|SIZZ01000001.1_prot_TBR39642.1_1065;	K00406	ccoP;	cytochrome	c	oxidase	cbb3-type	subunit	III
D	lcl|SIZZ01000002.1_prot_TBR36860.1_2604;	K00425	cydA;	cytochrome	bd	ubiquinol	oxidase	subunit	I	[EC:7.1.1.7]
D	lcl|SIZZ01000002.1_prot_TBR36859.1_2603;	K00426	cydB;	cytochrome	bd	ubiquinol	oxidase	subunit	II	[EC:7.1.1.7]
D	lcl|SIZZ01000001.1_prot_TBR40690.1_884;	K08738	CYC;	cytochrome	c
D	lcl|SIZZ01000002.1_prot_TBR36537.1_2244;	K02111	ATPF1A,	atpA;	F-type	H+/Na+-transporting	ATPase	subunit	alpha	[EC:7.1.2.2	7.2.2.1]
D	lcl|SIZZ01000002.1_prot_TBR36539.1_2246;	K02112	ATPF1B,	atpD;	F-type	H+/Na+-transporting	ATPase	subunit	beta	[EC:7.1.2.2	7.2.2.1]
D	lcl|SIZZ01000002.1_prot_TBR36538.1_2245;	K02115	ATPF1G,	atpG;	F-type	H+-transporting	ATPase	subunit	gamma
D	lcl|SIZZ01000002.1_prot_TBR36536.1_2243;	K02113	ATPF1D,	atpH;	F-type	H+-transporting	ATPase	subunit	delta
D	lcl|SIZZ01000002.1_prot_TBR36540.1_2247;	K02114	ATPF1E,	atpC;	F-type	H+-transporting	ATPase	subunit	epsilon
D	lcl|SIZZ01000002.1_prot_TBR36533.1_2240;	K02108	ATPF0A,	atpB;	F-type	H+-transporting	ATPase	subunit	a
D	lcl|SIZZ01000002.1_prot_TBR36535.1_2242;	K02109	ATPF0B,	atpF;	F-type	H+-transporting	ATPase	subunit	b
D	lcl|SIZZ01000002.1_prot_TBR36534.1_2241;	K02110	ATPF0C,	atpE;	F-type	H+-transporting	ATPase	subunit	c
D	lcl|SIZZ01000003.1_prot_TBR36338.1_3411;	K01507	ppa;	inorganic	pyrophosphatase	[EC:3.6.1.1]
D	lcl|SIZZ01000001.1_prot_TBR38992.1_344;	K00937	ppk1;	polyphosphate	kinase	[EC:2.7.4.1]
D	lcl|SIZZ01000001.1_prot_TBR39711.1_1139;	K00937	ppk1;	polyphosphate	kinase	[EC:2.7.4.1]
D	lcl|SIZZ01000002.1_prot_TBR37259.1_3033;	K22468	ppk2;	polyphosphate	kinase	[EC:2.7.4.34]
C	195	Photosynthesis	[PATH:ko00195]
D	lcl|SIZZ01000002.1_prot_TBR36540.1_2247;	K02114	ATPF1E,	atpC;	F-type	H+-transporting	ATPase	subunit	epsilon
D	lcl|SIZZ01000002.1_prot_TBR36539.1_2246;	K02112	ATPF1B,	atpD;	F-type	H+/Na+-transporting	ATPase	subunit	beta	[EC:7.1.2.2	7.2.2.1]
D	lcl|SIZZ01000002.1_prot_TBR36538.1_2245;	K02115	ATPF1G,	atpG;	F-type	H+-transporting	ATPase	subunit	gamma
D	lcl|SIZZ01000002.1_prot_TBR36537.1_2244;	K02111	ATPF1A,	atpA;	F-type	H+/Na+-transporting	ATPase	subunit	alpha	[EC:7.1.2.2	7.2.2.1]
D	lcl|SIZZ01000002.1_prot_TBR36536.1_2243;	K02113	ATPF1D,	atpH;	F-type	H+-transporting	ATPase	subunit	delta
D	lcl|SIZZ01000002.1_prot_TBR36535.1_2242;	K02109	ATPF0B,	atpF;	F-type	H+-transporting	ATPase	subunit	b
D	lcl|SIZZ01000002.1_prot_TBR36534.1_2241;	K02110	ATPF0C,	atpE;	F-type	H+-transporting	ATPase	subunit	c
D	lcl|SIZZ01000002.1_prot_TBR36533.1_2240;	K02108	ATPF0A,	atpB;	F-type	H+-transporting	ATPase	subunit	a
C	196	Photosynthesis	-	antenna	proteins	[PATH:ko00196]
C	710	Carbon	fixation	in	photosynthetic	organisms	[PATH:ko00710]
D	lcl|SIZZ01000001.1_prot_TBR40380.1_1872;	K00927	PGK,	pgk;	phosphoglycerate	kinase	[EC:2.7.2.3]
D	lcl|SIZZ01000001.1_prot_TBR40446.1_1946;	K00134	GAPDH,	gapA;	glyceraldehyde	3-phosphate	dehydrogenase	(phosphorylating)	[EC:1.2.1.12]
D	lcl|SIZZ01000001.1_prot_TBR40441.1_1941;	K01623	ALDO;	fructose-bisphosphate	aldolase,	class	I	[EC:4.1.2.13]
D	lcl|SIZZ01000001.1_prot_TBR39833.1_1273;	K11645	fbaB;	fructose-bisphosphate	aldolase,	class	I	[EC:4.1.2.13]
D	lcl|SIZZ01000004.1_prot_TBR35844.1_3507;	K03841	FBP,	fbp;	fructose-1,6-bisphosphatase	I	[EC:3.1.3.11]
D	lcl|SIZZ01000001.1_prot_TBR40382.1_1874;	K00615	E2.2.1.1,	tktA,	tktB;	transketolase	[EC:2.2.1.1]
D	lcl|SIZZ01000002.1_prot_TBR36495.1_2202;	K00615	E2.2.1.1,	tktA,	tktB;	transketolase	[EC:2.2.1.1]
D	lcl|SIZZ01000002.1_prot_TBR36851.1_2595;	K01807	rpiA;	ribose	5-phosphate	isomerase	A	[EC:5.3.1.6]
D	lcl|SIZZ01000001.1_prot_TBR39599.1_1019;	K01803	TPI,	tpiA;	triosephosphate	isomerase	(TIM)	[EC:5.3.1.1]
D	lcl|SIZZ01000002.1_prot_TBR36815.1_2556;	K01783	rpe,	RPE;	ribulose-phosphate	3-epimerase	[EC:5.1.3.1]
D	lcl|SIZZ01000002.1_prot_TBR36939.1_2691;	K01595	ppc;	phosphoenolpyruvate	carboxylase	[EC:4.1.1.31]
D	lcl|SIZZ01000002.1_prot_TBR36780.1_2517;	K00029	E1.1.1.40,	maeB;	malate	dehydrogenase	(oxaloacetate-decarboxylating)(NADP+)	[EC:1.1.1.40]
D	lcl|SIZZ01000001.1_prot_TBR39878.1_1320;	K00024	mdh;	malate	dehydrogenase	[EC:1.1.1.37]
C	720	Carbon	fixation	pathways	in	prokaryotes	[PATH:ko00720]
D	lcl|SIZZ01000001.1_prot_TBR39679.1_1103;	K01007	pps,	ppsA;	pyruvate,	water	dikinase	[EC:2.7.9.2]
D	lcl|SIZZ01000002.1_prot_TBR36939.1_2691;	K01595	ppc;	phosphoenolpyruvate	carboxylase	[EC:4.1.1.31]
D	lcl|SIZZ01000001.1_prot_TBR39878.1_1320;	K00024	mdh;	malate	dehydrogenase	[EC:1.1.1.37]
D	lcl|SIZZ01000002.1_prot_TBR37335.1_2862;	K01676	E4.2.1.2A,	fumA,	fumB;	fumarate	hydratase,	class	I	[EC:4.2.1.2]
D	lcl|SIZZ01000001.1_prot_TBR39245.1_617;	K01679	E4.2.1.2B,	fumC,	FH;	fumarate	hydratase,	class	II	[EC:4.2.1.2]
D	lcl|SIZZ01000001.1_prot_TBR39160.1_527;	K00239	sdhA,	frdA;	succinate	dehydrogenase	/	fumarate	reductase,	flavoprotein	subunit	[EC:1.3.5.1	1.3.5.4]
D	lcl|SIZZ01000001.1_prot_TBR39161.1_528;	K00240	sdhB,	frdB;	succinate	dehydrogenase	/	fumarate	reductase,	iron-sulfur	subunit	[EC:1.3.5.1	1.3.5.4]
D	lcl|SIZZ01000001.1_prot_TBR39158.1_525;	K00241	sdhC,	frdC;	succinate	dehydrogenase	/	fumarate	reductase,	cytochrome	b	subunit
D	lcl|SIZZ01000001.1_prot_TBR39159.1_526;	K00242	sdhD,	frdD;	succinate	dehydrogenase	/	fumarate	reductase,	membrane	anchor	subunit
D	lcl|SIZZ01000002.1_prot_TBR37026.1_2782;	K01902	sucD;	succinyl-CoA	synthetase	alpha	subunit	[EC:6.2.1.5]
D	lcl|SIZZ01000002.1_prot_TBR37025.1_2781;	K01903	sucC;	succinyl-CoA	synthetase	beta	subunit	[EC:6.2.1.5]
D	lcl|SIZZ01000001.1_prot_TBR39812.1_1251;	K00626	ACAT,	atoB;	acetyl-CoA	C-acetyltransferase	[EC:2.3.1.9]
D	lcl|SIZZ01000003.1_prot_TBR36102.1_3147;	K00626	ACAT,	atoB;	acetyl-CoA	C-acetyltransferase	[EC:2.3.1.9]
D	lcl|SIZZ01000003.1_prot_TBR36213.1_3275;	K00031	IDH1,	IDH2,	icd;	isocitrate	dehydrogenase	[EC:1.1.1.42]
D	lcl|SIZZ01000001.1_prot_TBR39575.1_991;	K01681	ACO,	acnA;	aconitate	hydratase	[EC:4.2.1.3]
D	lcl|SIZZ01000001.1_prot_TBR40699.1_990;	K01682	acnB;	aconitate	hydratase	2	/	2-methylisocitrate	dehydratase	[EC:4.2.1.3	4.2.1.99]
D	lcl|SIZZ01000001.1_prot_TBR38746.1_72;	K01962	accA;	acetyl-CoA	carboxylase	carboxyl	transferase	subunit	alpha	[EC:6.4.1.2	2.1.3.15]
D	lcl|SIZZ01000002.1_prot_TBR36763.1_2499;	K02160	accB,	bccP;	acetyl-CoA	carboxylase	biotin	carboxyl	carrier	protein
D	lcl|SIZZ01000002.1_prot_TBR37306.1_2498;	K01961	accC;	acetyl-CoA	carboxylase,	biotin	carboxylase	subunit	[EC:6.4.1.2	6.3.4.14]
D	lcl|SIZZ01000001.1_prot_TBR38889.1_231;	K01963	accD;	acetyl-CoA	carboxylase	carboxyl	transferase	subunit	beta	[EC:6.4.1.2	2.1.3.15]
D	lcl|SIZZ01000001.1_prot_TBR39782.1_1216;	K01848	E5.4.99.2A,	mcmA1;	methylmalonyl-CoA	mutase,	N-terminal	domain	[EC:5.4.99.2]
D	lcl|SIZZ01000001.1_prot_TBR39328.1_713;	K01491	folD;	methylenetetrahydrofolate	dehydrogenase	(NADP+)	/	methenyltetrahydrofolate	cyclohydrolase	[EC:1.5.1.5	3.5.4.9]
D	lcl|SIZZ01000002.1_prot_TBR36935.1_2687;	K00297	metF,	MTHFR;	methylenetetrahydrofolate	reductase	(NADH)	[EC:1.5.1.54]
D	lcl|SIZZ01000004.1_prot_TBR35860.1_3525;	K01895	ACSS1_2,	acs;	acetyl-CoA	synthetase	[EC:6.2.1.1]
C	680	Methane	metabolism	[PATH:ko00680]
D	lcl|SIZZ01000002.1_prot_TBR36631.1_2346;	K00121	frmA,	ADH5,	adhC;	S-(hydroxymethyl)glutathione	dehydrogenase	/	alcohol	dehydrogenase	[EC:1.1.1.284	1.1.1.1]
D	lcl|SIZZ01000001.1_prot_TBR39962.1_1409;	K01070	frmB,	ESD,	fghA;	S-formylglutathione	hydrolase	[EC:3.1.2.12]
D	lcl|SIZZ01000001.1_prot_TBR40257.1_1738;	K00600	glyA,	SHMT;	glycine	hydroxymethyltransferase	[EC:2.1.2.1]
D	lcl|SIZZ01000001.1_prot_TBR39123.1_484;	K01689	ENO,	eno;	enolase	[EC:4.2.1.11]
D	lcl|SIZZ01000002.1_prot_TBR36939.1_2691;	K01595	ppc;	phosphoenolpyruvate	carboxylase	[EC:4.1.1.31]
D	lcl|SIZZ01000001.1_prot_TBR39878.1_1320;	K00024	mdh;	malate	dehydrogenase	[EC:1.1.1.37]
D	lcl|SIZZ01000001.1_prot_TBR40441.1_1941;	K01623	ALDO;	fructose-bisphosphate	aldolase,	class	I	[EC:4.1.2.13]
D	lcl|SIZZ01000001.1_prot_TBR39833.1_1273;	K11645	fbaB;	fructose-bisphosphate	aldolase,	class	I	[EC:4.1.2.13]
D	lcl|SIZZ01000004.1_prot_TBR35844.1_3507;	K03841	FBP,	fbp;	fructose-1,6-bisphosphatase	I	[EC:3.1.3.11]
D	lcl|SIZZ01000003.1_prot_TBR36346.1_3420;	K21071	pfk,	pfp;	ATP-dependent	phosphofructokinase	/	diphosphate-dependent	phosphofructokinase	[EC:2.7.1.11	2.7.1.90]
D	lcl|SIZZ01000004.1_prot_TBR35860.1_3525;	K01895	ACSS1_2,	acs;	acetyl-CoA	synthetase	[EC:6.2.1.1]
D	lcl|SIZZ01000001.1_prot_TBR39679.1_1103;	K01007	pps,	ppsA;	pyruvate,	water	dikinase	[EC:2.7.9.2]
D	lcl|SIZZ01000002.1_prot_TBR36553.1_2265;	K01834	PGAM,	gpmA;	2,3-bisphosphoglycerate-dependent	phosphoglycerate	mutase	[EC:5.4.2.11]
D	lcl|SIZZ01000001.1_prot_TBR40074.1_1533;	K00058	serA,	PHGDH;	D-3-phosphoglycerate	dehydrogenase	/	2-oxoglutarate	reductase	[EC:1.1.1.95	1.1.1.399]
D	lcl|SIZZ01000001.1_prot_TBR39566.1_980;	K00831	serC,	PSAT1;	phosphoserine	aminotransferase	[EC:2.6.1.52]
C	910	Nitrogen	metabolism	[PATH:ko00910]
D	lcl|SIZZ01000001.1_prot_TBR40429.1_1928;	K00368	nirK;	nitrite	reductase	(NO-forming)	[EC:1.7.2.1]
D	lcl|SIZZ01000001.1_prot_TBR39977.1_1424;	K00459	ncd2,	npd;	nitronate	monooxygenase	[EC:1.13.12.16]
D	lcl|SIZZ01000001.1_prot_TBR39722.1_1150;	K15371	GDH2;	glutamate	dehydrogenase	[EC:1.4.1.2]
D	lcl|SIZZ01000004.1_prot_TBR35804.1_3465;	K01915	glnA,	GLUL;	glutamine	synthetase	[EC:6.3.1.2]
D	lcl|SIZZ01000002.1_prot_TBR37298.1_2417;	K00265	gltB;	glutamate	synthase	(NADPH)	large	chain	[EC:1.4.1.13]
D	lcl|SIZZ01000002.1_prot_TBR36690.1_2416;	K00266	gltD;	glutamate	synthase	(NADPH)	small	chain	[EC:1.4.1.13]
D	lcl|SIZZ01000001.1_prot_TBR38831.1_165;	K01673	cynT,	can;	carbonic	anhydrase	[EC:4.2.1.1]
D	lcl|SIZZ01000001.1_prot_TBR38854.1_192;	K01673	cynT,	can;	carbonic	anhydrase	[EC:4.2.1.1]
D	lcl|SIZZ01000001.1_prot_TBR39945.1_1392;	K01673	cynT,	can;	carbonic	anhydrase	[EC:4.2.1.1]
D	lcl|SIZZ01000001.1_prot_TBR39365.1_753;	K01674	cah;	carbonic	anhydrase	[EC:4.2.1.1]
C	920	Sulfur	metabolism	[PATH:ko00920]
D	lcl|SIZZ01000001.1_prot_TBR39512.1_922;	K23163	sbp;	sulfate/thiosulfate	transport	system	substrate-binding	protein
D	lcl|SIZZ01000001.1_prot_TBR39511.1_921;	K02046	cysU;	sulfate/thiosulfate	transport	system	permease	protein
D	lcl|SIZZ01000001.1_prot_TBR39510.1_920;	K02047	cysW;	sulfate/thiosulfate	transport	system	permease	protein
D	lcl|SIZZ01000001.1_prot_TBR39509.1_919;	K02045	cysA;	sulfate/thiosulfate	transport	system	ATP-binding	protein	[EC:7.3.2.3]
D	lcl|SIZZ01000001.1_prot_TBR39421.1_818;	K03119	tauD;	taurine	dioxygenase	[EC:1.14.11.17]
D	lcl|SIZZ01000001.1_prot_TBR40342.1_1831;	K00955	cysNC;	bifunctional	enzyme	CysN/CysC	[EC:2.7.7.4	2.7.1.25]
D	lcl|SIZZ01000001.1_prot_TBR40343.1_1832;	K00957	cysD;	sulfate	adenylyltransferase	subunit	2	[EC:2.7.7.4]
D	lcl|SIZZ01000001.1_prot_TBR39240.1_612;	K00958	sat,	met3;	sulfate	adenylyltransferase	[EC:2.7.7.4]
D	lcl|SIZZ01000001.1_prot_TBR40178.1_1651;	K01082	cysQ,	MET22,	BPNT1;	3'(2'),	5'-bisphosphate	nucleotidase	[EC:3.1.3.7]
D	lcl|SIZZ01000001.1_prot_TBR39239.1_611;	K00390	cysH;	phosphoadenosine	phosphosulfate	reductase	[EC:1.8.4.8	1.8.4.10]
D	lcl|SIZZ01000001.1_prot_TBR39237.1_609;	K00380	cysJ;	sulfite	reductase	(NADPH)	flavoprotein	alpha-component	[EC:1.8.1.2]
D	lcl|SIZZ01000001.1_prot_TBR40028.1_1481;	K00380	cysJ;	sulfite	reductase	(NADPH)	flavoprotein	alpha-component	[EC:1.8.1.2]
D	lcl|SIZZ01000001.1_prot_TBR39238.1_610;	K00381	cysI;	sulfite	reductase	(NADPH)	hemoprotein	beta-component	[EC:1.8.1.2]
D	lcl|SIZZ01000001.1_prot_TBR39025.1_379;	K01011	TST,	MPST,	sseA;	thiosulfate/3-mercaptopyruvate	sulfurtransferase	[EC:2.8.1.1	2.8.1.2]
D	lcl|SIZZ01000001.1_prot_TBR39243.1_615;	K01738	cysK;	cysteine	synthase	[EC:2.5.1.47]
D	lcl|SIZZ01000001.1_prot_TBR39138.1_501;	K00641	metX;	homoserine	O-acetyltransferase/O-succinyltransferase	[EC:2.3.1.31	2.3.1.46]
D	lcl|SIZZ01000001.1_prot_TBR40308.1_1796;	K00641	metX;	homoserine	O-acetyltransferase/O-succinyltransferase	[EC:2.3.1.31	2.3.1.46]
D	lcl|SIZZ01000001.1_prot_TBR40307.1_1795;	K01739	metB;	cystathionine	gamma-synthase	[EC:2.5.1.48]
B
B	9103	Lipid	metabolism
C	61	Fatty	acid	biosynthesis	[PATH:ko00061]
D	lcl|SIZZ01000001.1_prot_TBR38746.1_72;	K01962	accA;	acetyl-CoA	carboxylase	carboxyl	transferase	subunit	alpha	[EC:6.4.1.2	2.1.3.15]
D	lcl|SIZZ01000002.1_prot_TBR36763.1_2499;	K02160	accB,	bccP;	acetyl-CoA	carboxylase	biotin	carboxyl	carrier	protein
D	lcl|SIZZ01000002.1_prot_TBR37306.1_2498;	K01961	accC;	acetyl-CoA	carboxylase,	biotin	carboxylase	subunit	[EC:6.4.1.2	6.3.4.14]
D	lcl|SIZZ01000001.1_prot_TBR38889.1_231;	K01963	accD;	acetyl-CoA	carboxylase	carboxyl	transferase	subunit	beta	[EC:6.4.1.2	2.1.3.15]
D	lcl|SIZZ01000001.1_prot_TBR39191.1_561;	K02078	acpP;	acyl	carrier	protein
D	lcl|SIZZ01000001.1_prot_TBR40718.1_1230;	K02078	acpP;	acyl	carrier	protein
D	lcl|SIZZ01000001.1_prot_TBR39800.1_1238;	K02078	acpP;	acyl	carrier	protein
D	lcl|SIZZ01000001.1_prot_TBR39189.1_559;	K00645	fabD,	MCAT,	MCT1;	[acyl-carrier-protein]	S-malonyltransferase	[EC:2.3.1.39]
D	lcl|SIZZ01000001.1_prot_TBR39188.1_558;	K00648	fabH;	3-oxoacyl-[acyl-carrier-protein]	synthase	III	[EC:2.3.1.180]
D	lcl|SIZZ01000001.1_prot_TBR39798.1_1235;	K00647	fabB;	3-oxoacyl-[acyl-carrier-protein]	synthase	I	[EC:2.3.1.41]
D	lcl|SIZZ01000001.1_prot_TBR39192.1_562;	K09458	fabF,	OXSM,	CEM1;	3-oxoacyl-[acyl-carrier-protein]	synthase	II	[EC:2.3.1.179]
D	lcl|SIZZ01000001.1_prot_TBR39797.1_1234;	K09458	fabF,	OXSM,	CEM1;	3-oxoacyl-[acyl-carrier-protein]	synthase	II	[EC:2.3.1.179]
D	lcl|SIZZ01000001.1_prot_TBR39190.1_560;	K00059	fabG,	OAR1;	3-oxoacyl-[acyl-carrier	protein]	reductase	[EC:1.1.1.100]
D	lcl|SIZZ01000001.1_prot_TBR39384.1_772;	K00059	fabG,	OAR1;	3-oxoacyl-[acyl-carrier	protein]	reductase	[EC:1.1.1.100]
D	lcl|SIZZ01000001.1_prot_TBR39489.1_896;	K00059	fabG,	OAR1;	3-oxoacyl-[acyl-carrier	protein]	reductase	[EC:1.1.1.100]
D	lcl|SIZZ01000001.1_prot_TBR39807.1_1246;	K00059	fabG,	OAR1;	3-oxoacyl-[acyl-carrier	protein]	reductase	[EC:1.1.1.100]
D	lcl|SIZZ01000001.1_prot_TBR39944.1_1390;	K00059	fabG,	OAR1;	3-oxoacyl-[acyl-carrier	protein]	reductase	[EC:1.1.1.100]
D	lcl|SIZZ01000001.1_prot_TBR38753.1_79;	K02372	fabZ;	3-hydroxyacyl-[acyl-carrier-protein]	dehydratase	[EC:4.2.1.59]
D	lcl|SIZZ01000001.1_prot_TBR39686.1_1112;	K00208	fabI;	enoyl-[acyl-carrier	protein]	reductase	I	[EC:1.3.1.9	1.3.1.10]
D	lcl|SIZZ01000001.1_prot_TBR39414.1_811;	K00209	fabV,	ter;	enoyl-[acyl-carrier	protein]	reductase	/	trans-2-enoyl-CoA	reductase	(NAD+)	[EC:1.3.1.9	1.3.1.44]
D	lcl|SIZZ01000001.1_prot_TBR39577.1_993;	K01897	ACSL,	fadD;	long-chain	acyl-CoA	synthetase	[EC:6.2.1.3]
C	62	Fatty	acid	elongation	[PATH:ko00062]
C	71	Fatty	acid	degradation	[PATH:ko00071]
D	lcl|SIZZ01000001.1_prot_TBR39812.1_1251;	K00626	ACAT,	atoB;	acetyl-CoA	C-acetyltransferase	[EC:2.3.1.9]
D	lcl|SIZZ01000003.1_prot_TBR36102.1_3147;	K00626	ACAT,	atoB;	acetyl-CoA	C-acetyltransferase	[EC:2.3.1.9]
D	lcl|SIZZ01000001.1_prot_TBR39316.1_701;	K00632	fadA,	fadI;	acetyl-CoA	acyltransferase	[EC:2.3.1.16]
D	lcl|SIZZ01000001.1_prot_TBR39671.1_1095;	K01782	fadJ;	3-hydroxyacyl-CoA	dehydrogenase	/	enoyl-CoA	hydratase	/	3-hydroxybutyryl-CoA	epimerase	[EC:1.1.1.35	4.2.1.17	5.1.2.3]
D	lcl|SIZZ01000001.1_prot_TBR39317.1_702;	K07516	fadN;	3-hydroxyacyl-CoA	dehydrogenase	[EC:1.1.1.35]
D	lcl|SIZZ01000001.1_prot_TBR39726.1_1154;	K00248	ACADS,	bcd;	butyryl-CoA	dehydrogenase	[EC:1.3.8.1]
D	lcl|SIZZ01000002.1_prot_TBR37252.1_3026;	K00249	ACADM,	acd;	acyl-CoA	dehydrogenase	[EC:1.3.8.7]
D	lcl|SIZZ01000001.1_prot_TBR40320.1_1808;	K06445	fadE;	acyl-CoA	dehydrogenase	[EC:1.3.99.-]
D	lcl|SIZZ01000001.1_prot_TBR39717.1_1145;	K00252	GCDH,	gcdH;	glutaryl-CoA	dehydrogenase	[EC:1.3.8.6]
D	lcl|SIZZ01000001.1_prot_TBR39577.1_993;	K01897	ACSL,	fadD;	long-chain	acyl-CoA	synthetase	[EC:6.2.1.3]
D	lcl|SIZZ01000001.1_prot_TBR39026.1_380;	K13238	ECI1,	DCI;	Delta3-Delta2-enoyl-CoA	isomerase	[EC:5.3.3.8]
D	lcl|SIZZ01000002.1_prot_TBR36631.1_2346;	K00121	frmA,	ADH5,	adhC;	S-(hydroxymethyl)glutathione	dehydrogenase	/	alcohol	dehydrogenase	[EC:1.1.1.284	1.1.1.1]
D	lcl|SIZZ01000001.1_prot_TBR39490.1_897;	K13953	adhP;	alcohol	dehydrogenase,	propanol-preferring	[EC:1.1.1.1]
D	lcl|SIZZ01000002.1_prot_TBR36688.1_2414;	K13953	adhP;	alcohol	dehydrogenase,	propanol-preferring	[EC:1.1.1.1]
D	lcl|SIZZ01000004.1_prot_TBR35960.1_3631;	K00128	ALDH;	aldehyde	dehydrogenase	(NAD+)	[EC:1.2.1.3]
D	lcl|SIZZ01000001.1_prot_TBR39704.1_1131;	K14085	ALDH7A1;	aldehyde	dehydrogenase	family	7	member	A1	[EC:1.2.1.31	1.2.1.8	1.2.1.3]
C	73	Cutin,	suberine	and	wax	biosynthesis	[PATH:ko00073]
C	100	Steroid	biosynthesis	[PATH:ko00100]
C	120	Primary	bile	acid	biosynthesis	[PATH:ko00120]
C	121	Secondary	bile	acid	biosynthesis	[PATH:ko00121]
C	140	Steroid	hormone	biosynthesis	[PATH:ko00140]
C	561	Glycerolipid	metabolism	[PATH:ko00561]
D	lcl|SIZZ01000001.1_prot_TBR40205.1_1681;	K15918	GLYK;	D-glycerate	3-kinase	[EC:2.7.1.31]
D	lcl|SIZZ01000004.1_prot_TBR35960.1_3631;	K00128	ALDH;	aldehyde	dehydrogenase	(NAD+)	[EC:1.2.1.3]
D	lcl|SIZZ01000001.1_prot_TBR39704.1_1131;	K14085	ALDH7A1;	aldehyde	dehydrogenase	family	7	member	A1	[EC:1.2.1.31	1.2.1.8	1.2.1.3]
D	lcl|SIZZ01000001.1_prot_TBR39078.1_438;	K13979	yahK;	alcohol	dehydrogenase	(NADP+)	[EC:1.1.1.2]
D	lcl|SIZZ01000001.1_prot_TBR40791.1_2138;	K00864	glpK,	GK;	glycerol	kinase	[EC:2.7.1.30]
D	lcl|SIZZ01000002.1_prot_TBR36586.1_2298;	K00631	plsB;	glycerol-3-phosphate	O-acyltransferase	[EC:2.3.1.15]
D	lcl|SIZZ01000001.1_prot_TBR40161.1_1631;	K00901	dgkA,	DGK;	diacylglycerol	kinase	(ATP)	[EC:2.7.1.107]
C	564	Glycerophospholipid	metabolism	[PATH:ko00564]
D	lcl|SIZZ01000002.1_prot_TBR36612.1_2326;	K00057	gpsA;	glycerol-3-phosphate	dehydrogenase	(NAD(P)+)	[EC:1.1.1.94]
D	lcl|SIZZ01000002.1_prot_TBR36586.1_2298;	K00631	plsB;	glycerol-3-phosphate	O-acyltransferase	[EC:2.3.1.15]
D	lcl|SIZZ01000001.1_prot_TBR40161.1_1631;	K00901	dgkA,	DGK;	diacylglycerol	kinase	(ATP)	[EC:2.7.1.107]
D	lcl|SIZZ01000001.1_prot_TBR38965.1_311;	K01058	pldA;	phospholipase	A1/A2	[EC:3.1.1.32	3.1.1.4]
D	lcl|SIZZ01000004.1_prot_TBR35959.1_3630;	K01048	pldB;	lysophospholipase	[EC:3.1.1.5]
D	lcl|SIZZ01000004.1_prot_TBR35901.1_3568;	K14676	NTE,	NRE;	lysophospholipid	hydrolase	[EC:3.1.1.5]
D	lcl|SIZZ01000003.1_prot_TBR36375.1_3181;	K01126	E3.1.4.46,	glpQ,	ugpQ;	glycerophosphoryl	diester	phosphodiesterase	[EC:3.1.4.46]
D	lcl|SIZZ01000001.1_prot_TBR39804.1_1243;	K05929	E2.1.1.103,	NMT;	phosphoethanolamine	N-methyltransferase	[EC:2.1.1.103]
D	lcl|SIZZ01000001.1_prot_TBR38757.1_84;	K00981	E2.7.7.41,	CDS1,	CDS2,	cdsA;	phosphatidate	cytidylyltransferase	[EC:2.7.7.41]
D	lcl|SIZZ01000002.1_prot_TBR36577.1_2289;	K00998	pssA;	CDP-diacylglycerol---serine	O-phosphatidyltransferase	[EC:2.7.8.8]
D	lcl|SIZZ01000001.1_prot_TBR40218.1_1694;	K17103	CHO1,	pssA;	CDP-diacylglycerol---serine	O-phosphatidyltransferase	[EC:2.7.8.8]
D	lcl|SIZZ01000001.1_prot_TBR38876.1_218;	K01613	psd,	PISD;	phosphatidylserine	decarboxylase	[EC:4.1.1.65]
D	lcl|SIZZ01000001.1_prot_TBR39560.1_974;	K00995	pgsA,	PGS1;	CDP-diacylglycerol---glycerol-3-phosphate	3-phosphatidyltransferase	[EC:2.7.8.5]
D	lcl|SIZZ01000001.1_prot_TBR40246.1_1724;	K01095	pgpA;	phosphatidylglycerophosphatase	A	[EC:3.1.3.27]
D	lcl|SIZZ01000001.1_prot_TBR39083.1_443;	K06131	clsA_B;	cardiolipin	synthase	A/B	[EC:2.7.8.-]
D	lcl|SIZZ01000004.1_prot_TBR35800.1_3461;	K06132	clsC;	cardiolipin	synthase	C	[EC:2.7.8.-]
D	lcl|SIZZ01000002.1_prot_TBR37141.1_2909;	K08744	CRLS;	cardiolipin	synthase	(CMP-forming)	[EC:2.7.8.41]
C	565	Ether	lipid	metabolism	[PATH:ko00565]
D	lcl|SIZZ01000001.1_prot_TBR38965.1_311;	K01058	pldA;	phospholipase	A1/A2	[EC:3.1.1.32	3.1.1.4]
C	600	Sphingolipid	metabolism	[PATH:ko00600]
C	590	Arachidonic	acid	metabolism	[PATH:ko00590]
D	lcl|SIZZ01000001.1_prot_TBR38965.1_311;	K01058	pldA;	phospholipase	A1/A2	[EC:3.1.1.32	3.1.1.4]
D	lcl|SIZZ01000002.1_prot_TBR36442.1_2140;	K01254	LTA4H;	leukotriene-A4	hydrolase	[EC:3.3.2.6]
D	lcl|SIZZ01000001.1_prot_TBR38960.1_306;	K00432	gpx,	btuE,	bsaA;	glutathione	peroxidase	[EC:1.11.1.9]
C	591	Linoleic	acid	metabolism	[PATH:ko00591]
D	lcl|SIZZ01000001.1_prot_TBR38965.1_311;	K01058	pldA;	phospholipase	A1/A2	[EC:3.1.1.32	3.1.1.4]
C	592	alpha-Linolenic	acid	metabolism	[PATH:ko00592]
D	lcl|SIZZ01000001.1_prot_TBR38965.1_311;	K01058	pldA;	phospholipase	A1/A2	[EC:3.1.1.32	3.1.1.4]
D	lcl|SIZZ01000001.1_prot_TBR39316.1_701;	K00632	fadA,	fadI;	acetyl-CoA	acyltransferase	[EC:2.3.1.16]
C	1040	Biosynthesis	of	unsaturated	fatty	acids	[PATH:ko01040]
D	lcl|SIZZ01000002.1_prot_TBR36604.1_2317;	K00507	SCD,	desC;	stearoyl-CoA	desaturase	(Delta-9	desaturase)	[EC:1.14.19.1]
D	lcl|SIZZ01000001.1_prot_TBR39060.1_418;	K22769	desA3;	NADPH-dependent	stearoyl-CoA	9-desaturase	[EC:1.14.19.-]
D	lcl|SIZZ01000001.1_prot_TBR39059.1_417;	K22770	K22770;	stearoyl-CoA	9-desaturase	NADPH	oxidoreductase
D	lcl|SIZZ01000001.1_prot_TBR40171.1_1644;	K10804	tesA;	acyl-CoA	thioesterase	I	[EC:3.1.2.-	3.1.2.2	3.1.1.2	3.1.1.5]
D	lcl|SIZZ01000001.1_prot_TBR38813.1_145;	K10805	tesB;	acyl-CoA	thioesterase	II	[EC:3.1.2.-]
D	lcl|SIZZ01000002.1_prot_TBR37273.1_3049;	K10806	yciA;	acyl-CoA	thioesterase	YciA	[EC:3.1.2.-]
B
B	9104	Nucleotide	metabolism
C	230	Purine	metabolism	[PATH:ko00230]
D	lcl|SIZZ01000002.1_prot_TBR37237.1_3009;	K01515	nudF;	ADP-ribose	pyrophosphatase	[EC:3.6.1.13	3.6.1.-]
D	lcl|SIZZ01000001.1_prot_TBR40179.1_1652;	K08312	nudE;	ADP-ribose	diphosphatase	[EC:3.6.1.-]
D	lcl|SIZZ01000004.1_prot_TBR35784.1_3443;	K15778	pmm-pgm;	phosphomannomutase	/	phosphoglucomutase	[EC:5.4.2.8	5.4.2.2]
D	lcl|SIZZ01000002.1_prot_TBR37345.1_3040;	K00948	PRPS,	prsA;	ribose-phosphate	pyrophosphokinase	[EC:2.7.6.1]
D	lcl|SIZZ01000001.1_prot_TBR39089.1_449;	K00764	purF,	PPAT;	amidophosphoribosyltransferase	[EC:2.4.2.14]
D	lcl|SIZZ01000002.1_prot_TBR36518.1_2225;	K01945	purD;	phosphoribosylamine---glycine	ligase	[EC:6.3.4.13]
D	lcl|SIZZ01000002.1_prot_TBR37139.1_2906;	K11175	purN;	phosphoribosylglycinamide	formyltransferase	1	[EC:2.1.2.2]
D	lcl|SIZZ01000001.1_prot_TBR38809.1_141;	K08289	purT;	phosphoribosylglycinamide	formyltransferase	2	[EC:6.3.1.21]
D	lcl|SIZZ01000001.1_prot_TBR40281.1_1766;	K01952	PFAS,	purL;	phosphoribosylformylglycinamidine	synthase	[EC:6.3.5.3]
D	lcl|SIZZ01000002.1_prot_TBR37140.1_2907;	K01933	purM;	phosphoribosylformylglycinamidine	cyclo-ligase	[EC:6.3.3.1]
D	lcl|SIZZ01000001.1_prot_TBR40112.1_1577;	K01589	purK;	5-(carboxyamino)imidazole	ribonucleotide	synthase	[EC:6.3.4.18]
D	lcl|SIZZ01000001.1_prot_TBR40113.1_1578;	K01588	purE;	5-(carboxyamino)imidazole	ribonucleotide	mutase	[EC:5.4.99.18]
D	lcl|SIZZ01000002.1_prot_TBR36812.1_2553;	K01923	purC;	phosphoribosylaminoimidazole-succinocarboxamide	synthase	[EC:6.3.2.6]
D	lcl|SIZZ01000001.1_prot_TBR39244.1_616;	K01756	purB,	ADSL;	adenylosuccinate	lyase	[EC:4.3.2.2]
D	lcl|SIZZ01000002.1_prot_TBR36757.1_2492;	K00602	purH;	phosphoribosylaminoimidazolecarboxamide	formyltransferase	/	IMP	cyclohydrolase	[EC:2.1.2.3	3.5.4.10]
D	lcl|SIZZ01000002.1_prot_TBR37077.1_2840;	K00759	APRT,	apt;	adenine	phosphoribosyltransferase	[EC:2.4.2.7]
D	lcl|SIZZ01000001.1_prot_TBR39720.1_1148;	K01081	E3.1.3.5;	5'-nucleotidase	[EC:3.1.3.5]
D	lcl|SIZZ01000001.1_prot_TBR39129.1_491;	K03787	surE;	5'/3'-nucleotidase	[EC:3.1.3.5	3.1.3.6]
D	lcl|SIZZ01000002.1_prot_TBR37035.1_2791;	K05810	LACC1,	yfiH;	purine-nucleoside/S-methyl-5'-thioadenosine	phosphorylase	/	adenosine	deaminase	[EC:2.4.2.1	2.4.2.28	3.5.4.4]
D	lcl|SIZZ01000001.1_prot_TBR39654.1_1077;	K00760	hprT,	hpt,	HPRT1;	hypoxanthine	phosphoribosyltransferase	[EC:2.4.2.8]
D	lcl|SIZZ01000001.1_prot_TBR39329.1_714;	K00088	IMPDH,	guaB;	IMP	dehydrogenase	[EC:1.1.1.205]
D	lcl|SIZZ01000001.1_prot_TBR39319.1_704;	K00940	ndk,	NME;	nucleoside-diphosphate	kinase	[EC:2.7.4.6]
D	lcl|SIZZ01000002.1_prot_TBR36866.1_2611;	K01519	rdgB,	ITPA;	XTP/dITP	diphosphohydrolase	[EC:3.6.1.66]
D	lcl|SIZZ01000001.1_prot_TBR39330.1_715;	K01951	guaA,	GMPS;	GMP	synthase	(glutamine-hydrolysing)	[EC:6.3.5.2]
D	lcl|SIZZ01000003.1_prot_TBR36018.1_3053;	K01951	guaA,	GMPS;	GMP	synthase	(glutamine-hydrolysing)	[EC:6.3.5.2]
D	lcl|SIZZ01000002.1_prot_TBR36869.1_2614;	K00942	gmk,	GUK1;	guanylate	kinase	[EC:2.7.4.8]
D	lcl|SIZZ01000001.1_prot_TBR40602.1_2113;	K00525	E1.17.4.1A,	nrdA,	nrdE;	ribonucleoside-diphosphate	reductase	alpha	chain	[EC:1.17.4.1]
D	lcl|SIZZ01000003.1_prot_TBR36382.1_3262;	K00525	E1.17.4.1A,	nrdA,	nrdE;	ribonucleoside-diphosphate	reductase	alpha	chain	[EC:1.17.4.1]
D	lcl|SIZZ01000003.1_prot_TBR36200.1_3260;	K00526	E1.17.4.1B,	nrdB,	nrdF;	ribonucleoside-diphosphate	reductase	beta	chain	[EC:1.17.4.1]
D	lcl|SIZZ01000002.1_prot_TBR36877.1_2622;	K01139	spoT;	GTP	diphosphokinase	/	guanosine-3',5'-bis(diphosphate)	3'-diphosphatase	[EC:2.7.6.5	3.1.7.2]
D	lcl|SIZZ01000001.1_prot_TBR38991.1_343;	K01524	ppx-gppA;	exopolyphosphatase	/	guanosine-5'-triphosphate,3'-diphosphate	pyrophosphatase	[EC:3.6.1.11	3.6.1.40]
D	lcl|SIZZ01000002.1_prot_TBR37110.1_2876;	K00951	relA;	GTP	pyrophosphokinase	[EC:2.7.6.5]
D	lcl|SIZZ01000001.1_prot_TBR38837.1_172;	K01939	purA,	ADSS;	adenylosuccinate	synthase	[EC:6.3.4.4]
D	lcl|SIZZ01000001.1_prot_TBR40621.1_2135;	K00856	ADK,	adoK;	adenosine	kinase	[EC:2.7.1.20]
D	lcl|SIZZ01000003.1_prot_TBR36313.1_3385;	K01241	amn;	AMP	nucleosidase	[EC:3.2.2.4]
D	lcl|SIZZ01000001.1_prot_TBR40106.1_1570;	K06966	ppnN;	pyrimidine/purine-5'-nucleotide	nucleosidase	[EC:3.2.2.10	3.2.2.-]
D	lcl|SIZZ01000003.1_prot_TBR36118.1_3166;	K01119	cpdB;	2',3'-cyclic-nucleotide	2'-phosphodiesterase	/	3'-nucleotidase	[EC:3.1.4.16	3.1.3.6]
D	lcl|SIZZ01000003.1_prot_TBR36347.1_3421;	K00939	adk,	AK;	adenylate	kinase	[EC:2.7.4.3]
D	lcl|SIZZ01000002.1_prot_TBR36990.1_2745;	K01525	apaH;	bis(5'-nucleosyl)-tetraphosphatase	(symmetrical)	[EC:3.6.1.41]
D	lcl|SIZZ01000001.1_prot_TBR40342.1_1831;	K00955	cysNC;	bifunctional	enzyme	CysN/CysC	[EC:2.7.7.4	2.7.1.25]
D	lcl|SIZZ01000001.1_prot_TBR38916.1_258;	K01513	ENPP1_3,	CD203;	ectonucleotide	pyrophosphatase/phosphodiesterase	family	member	2022-01-03	[EC:3.1.4.1	3.6.1.9]
D	lcl|SIZZ01000001.1_prot_TBR40177.1_1650;	K04765	mazG;	nucleoside	triphosphate	diphosphatase	[EC:3.6.1.9]
D	lcl|SIZZ01000001.1_prot_TBR40343.1_1832;	K00957	cysD;	sulfate	adenylyltransferase	subunit	2	[EC:2.7.7.4]
D	lcl|SIZZ01000001.1_prot_TBR39240.1_612;	K00958	sat,	met3;	sulfate	adenylyltransferase	[EC:2.7.7.4]
C	240	Pyrimidine	metabolism	[PATH:ko00240]
D	lcl|SIZZ01000001.1_prot_TBR39295.1_679;	K01955	carB,	CPA2;	carbamoyl-phosphate	synthase	large	subunit	[EC:6.3.5.5]
D	lcl|SIZZ01000001.1_prot_TBR39294.1_678;	K01956	carA,	CPA1;	carbamoyl-phosphate	synthase	small	subunit	[EC:6.3.5.5]
D	lcl|SIZZ01000001.1_prot_TBR40195.1_1670;	K00609	pyrB,	PYR2;	aspartate	carbamoyltransferase	catalytic	subunit	[EC:2.1.3.2]
D	lcl|SIZZ01000001.1_prot_TBR39413.1_810;	K01465	URA4,	pyrC;	dihydroorotase	[EC:3.5.2.3]
D	lcl|SIZZ01000001.1_prot_TBR39918.1_1362;	K01465	URA4,	pyrC;	dihydroorotase	[EC:3.5.2.3]
D	lcl|SIZZ01000001.1_prot_TBR39707.1_1134;	K00254	DHODH,	pyrD;	dihydroorotate	dehydrogenase	[EC:1.3.5.2]
D	lcl|SIZZ01000004.1_prot_TBR35782.1_3441;	K00762	pyrE;	orotate	phosphoribosyltransferase	[EC:2.4.2.10]
D	lcl|SIZZ01000001.1_prot_TBR40261.1_1743;	K01591	pyrF;	orotidine-5'-phosphate	decarboxylase	[EC:4.1.1.23]
D	lcl|SIZZ01000001.1_prot_TBR38760.1_87;	K09903	pyrH;	uridylate	kinase	[EC:2.7.4.22]
D	lcl|SIZZ01000001.1_prot_TBR39319.1_704;	K00940	ndk,	NME;	nucleoside-diphosphate	kinase	[EC:2.7.4.6]
D	lcl|SIZZ01000001.1_prot_TBR38916.1_258;	K01513	ENPP1_3,	CD203;	ectonucleotide	pyrophosphatase/phosphodiesterase	family	member	2022-01-03	[EC:3.1.4.1	3.6.1.9]
D	lcl|SIZZ01000001.1_prot_TBR40177.1_1650;	K04765	mazG;	nucleoside	triphosphate	diphosphatase	[EC:3.6.1.9]
D	lcl|SIZZ01000001.1_prot_TBR39972.1_1419;	K06287	yhdE;	nucleoside	triphosphate	pyrophosphatase	[EC:3.6.1.-]
D	lcl|SIZZ01000001.1_prot_TBR39121.1_482;	K01937	pyrG,	CTPS;	CTP	synthase	[EC:6.3.4.2]
D	lcl|SIZZ01000001.1_prot_TBR38867.1_206;	K01494	dcd;	dCTP	deaminase	[EC:3.5.4.13]
D	lcl|SIZZ01000001.1_prot_TBR39302.1_686;	K00945	cmk;	CMP/dCMP	kinase	[EC:2.7.4.25]
D	lcl|SIZZ01000001.1_prot_TBR39720.1_1148;	K01081	E3.1.3.5;	5'-nucleotidase	[EC:3.1.3.5]
D	lcl|SIZZ01000001.1_prot_TBR39129.1_491;	K03787	surE;	5'/3'-nucleotidase	[EC:3.1.3.5	3.1.3.6]
D	lcl|SIZZ01000002.1_prot_TBR36880.1_2625;	K01240	URH1;	uridine	nucleosidase	[EC:3.2.2.3]
D	lcl|SIZZ01000001.1_prot_TBR40070.1_1529;	K00761	upp,	UPRT;	uracil	phosphoribosyltransferase	[EC:2.4.2.9]
D	lcl|SIZZ01000003.1_prot_TBR36118.1_3166;	K01119	cpdB;	2',3'-cyclic-nucleotide	2'-phosphodiesterase	/	3'-nucleotidase	[EC:3.1.4.16	3.1.3.6]
D	lcl|SIZZ01000001.1_prot_TBR39963.1_1410;	K16066	ydfG;	3-hydroxy	acid	dehydrogenase	/	malonic	semialdehyde	reductase	[EC:1.1.1.381	1.1.1.-]
D	lcl|SIZZ01000003.1_prot_TBR36317.1_3390;	K09019	rutE;	3-hydroxypropanoate	dehydrogenase	[EC:1.1.1.-]
D	lcl|SIZZ01000001.1_prot_TBR40106.1_1570;	K06966	ppnN;	pyrimidine/purine-5'-nucleotide	nucleosidase	[EC:3.2.2.10	3.2.2.-]
D	lcl|SIZZ01000002.1_prot_TBR37241.1_3014;	K01489	cdd,	CDA;	cytidine	deaminase	[EC:3.5.4.5]
D	lcl|SIZZ01000001.1_prot_TBR40602.1_2113;	K00525	E1.17.4.1A,	nrdA,	nrdE;	ribonucleoside-diphosphate	reductase	alpha	chain	[EC:1.17.4.1]
D	lcl|SIZZ01000003.1_prot_TBR36382.1_3262;	K00525	E1.17.4.1A,	nrdA,	nrdE;	ribonucleoside-diphosphate	reductase	alpha	chain	[EC:1.17.4.1]
D	lcl|SIZZ01000003.1_prot_TBR36200.1_3260;	K00526	E1.17.4.1B,	nrdB,	nrdF;	ribonucleoside-diphosphate	reductase	beta	chain	[EC:1.17.4.1]
D	lcl|SIZZ01000001.1_prot_TBR39196.1_566;	K00943	tmk,	DTYMK;	dTMP	kinase	[EC:2.7.4.9]
D	lcl|SIZZ01000004.1_prot_TBR35987.1_3444;	K01520	dut,	DUT;	dUTP	pyrophosphatase	[EC:3.6.1.23]
D	lcl|SIZZ01000002.1_prot_TBR36596.1_2309;	K00857	tdk,	TK;	thymidine	kinase	[EC:2.7.1.21]
D	lcl|SIZZ01000001.1_prot_TBR40154.1_1624;	K00560	thyA,	TYMS;	thymidylate	synthase	[EC:2.1.1.45]
B
B	9105	Amino	acid	metabolism
C	250	Alanine,	aspartate	and	glutamate	metabolism	[PATH:ko00250]
D	lcl|SIZZ01000001.1_prot_TBR39879.1_1321;	K00812	aspB;	aspartate	aminotransferase	[EC:2.6.1.1]
D	lcl|SIZZ01000001.1_prot_TBR40752.1_1638;	K13051	ASRGL1,	iaaA;	L-asparaginase	/	beta-aspartyl-peptidase	[EC:3.5.1.1	3.4.19.5]
D	lcl|SIZZ01000002.1_prot_TBR37272.1_3048;	K13051	ASRGL1,	iaaA;	L-asparaginase	/	beta-aspartyl-peptidase	[EC:3.5.1.1	3.4.19.5]
D	lcl|SIZZ01000001.1_prot_TBR39537.1_949;	K01953	asnB,	ASNS;	asparagine	synthase	(glutamine-hydrolysing)	[EC:6.3.5.4]
D	lcl|SIZZ01000001.1_prot_TBR39584.1_1000;	K13566	NIT2,	yafV;	omega-amidase	[EC:3.5.1.3]
D	lcl|SIZZ01000002.1_prot_TBR36777.1_2514;	K14260	alaA;	alanine-synthesizing	transaminase	[EC:2.6.1.66	2.6.1.2]
D	lcl|SIZZ01000001.1_prot_TBR39628.1_1051;	K00259	ald;	alanine	dehydrogenase	[EC:1.4.1.1]
D	lcl|SIZZ01000001.1_prot_TBR39910.1_1353;	K01940	argG,	ASS1;	argininosuccinate	synthase	[EC:6.3.4.5]
D	lcl|SIZZ01000001.1_prot_TBR39905.1_1348;	K01755	argH,	ASL;	argininosuccinate	lyase	[EC:4.3.2.1]
D	lcl|SIZZ01000001.1_prot_TBR38837.1_172;	K01939	purA,	ADSS;	adenylosuccinate	synthase	[EC:6.3.4.4]
D	lcl|SIZZ01000001.1_prot_TBR39244.1_616;	K01756	purB,	ADSL;	adenylosuccinate	lyase	[EC:4.3.2.2]
D	lcl|SIZZ01000001.1_prot_TBR40195.1_1670;	K00609	pyrB,	PYR2;	aspartate	carbamoyltransferase	catalytic	subunit	[EC:2.1.3.2]
D	lcl|SIZZ01000001.1_prot_TBR40035.1_1488;	K00823	puuE;	4-aminobutyrate	aminotransferase	[EC:2.6.1.19]
D	lcl|SIZZ01000002.1_prot_TBR37298.1_2417;	K00265	gltB;	glutamate	synthase	(NADPH)	large	chain	[EC:1.4.1.13]
D	lcl|SIZZ01000002.1_prot_TBR36690.1_2416;	K00266	gltD;	glutamate	synthase	(NADPH)	small	chain	[EC:1.4.1.13]
D	lcl|SIZZ01000001.1_prot_TBR39722.1_1150;	K15371	GDH2;	glutamate	dehydrogenase	[EC:1.4.1.2]
D	lcl|SIZZ01000002.1_prot_TBR36664.1_2384;	K13821	putA;	RHH-type	transcriptional	regulator,	proline	utilization	regulon	repressor	/	proline	dehydrogenase	/	delta	1-pyrroline-5-carboxylate	dehydrogenase	[EC:1.5.5.2	1.2.1.88]
D	lcl|SIZZ01000004.1_prot_TBR35804.1_3465;	K01915	glnA,	GLUL;	glutamine	synthetase	[EC:6.3.1.2]
D	lcl|SIZZ01000001.1_prot_TBR39295.1_679;	K01955	carB,	CPA2;	carbamoyl-phosphate	synthase	large	subunit	[EC:6.3.5.5]
D	lcl|SIZZ01000001.1_prot_TBR39294.1_678;	K01956	carA,	CPA1;	carbamoyl-phosphate	synthase	small	subunit	[EC:6.3.5.5]
D	lcl|SIZZ01000001.1_prot_TBR40373.1_1864;	K00820	glmS,	GFPT;	glutamine---fructose-6-phosphate	transaminase	(isomerizing)	[EC:2.6.1.16]
D	lcl|SIZZ01000003.1_prot_TBR36124.1_3173;	K00820	glmS,	GFPT;	glutamine---fructose-6-phosphate	transaminase	(isomerizing)	[EC:2.6.1.16]
D	lcl|SIZZ01000001.1_prot_TBR39089.1_449;	K00764	purF,	PPAT;	amidophosphoribosyltransferase	[EC:2.4.2.14]
C	260	Glycine,	serine	and	threonine	metabolism	[PATH:ko00260]
D	lcl|SIZZ01000002.1_prot_TBR37336.1_2863;	K00928	lysC;	aspartate	kinase	[EC:2.7.2.4]
D	lcl|SIZZ01000001.1_prot_TBR38881.1_223;	K00133	asd;	aspartate-semialdehyde	dehydrogenase	[EC:1.2.1.11]
D	lcl|SIZZ01000001.1_prot_TBR40306.1_1794;	K00003	hom;	homoserine	dehydrogenase	[EC:1.1.1.3]
D	lcl|SIZZ01000003.1_prot_TBR36371.1_3165;	K00003	hom;	homoserine	dehydrogenase	[EC:1.1.1.3]
D	lcl|SIZZ01000003.1_prot_TBR36370.1_3164;	K00872	thrB;	homoserine	kinase	[EC:2.7.1.39]
D	lcl|SIZZ01000003.1_prot_TBR36117.1_3163;	K01733	thrC;	threonine	synthase	[EC:4.2.3.1]
D	lcl|SIZZ01000001.1_prot_TBR40286.1_1772;	K01620	ltaE;	threonine	aldolase	[EC:4.1.2.48]
D	lcl|SIZZ01000001.1_prot_TBR40257.1_1738;	K00600	glyA,	SHMT;	glycine	hydroxymethyltransferase	[EC:2.1.2.1]
D	lcl|SIZZ01000002.1_prot_TBR36553.1_2265;	K01834	PGAM,	gpmA;	2,3-bisphosphoglycerate-dependent	phosphoglycerate	mutase	[EC:5.4.2.11]
D	lcl|SIZZ01000001.1_prot_TBR40205.1_1681;	K15918	GLYK;	D-glycerate	3-kinase	[EC:2.7.1.31]
D	lcl|SIZZ01000001.1_prot_TBR40074.1_1533;	K00058	serA,	PHGDH;	D-3-phosphoglycerate	dehydrogenase	/	2-oxoglutarate	reductase	[EC:1.1.1.95	1.1.1.399]
D	lcl|SIZZ01000001.1_prot_TBR39566.1_980;	K00831	serC,	PSAT1;	phosphoserine	aminotransferase	[EC:2.6.1.52]
D	lcl|SIZZ01000001.1_prot_TBR39963.1_1410;	K16066	ydfG;	3-hydroxy	acid	dehydrogenase	/	malonic	semialdehyde	reductase	[EC:1.1.1.381	1.1.1.-]
D	lcl|SIZZ01000001.1_prot_TBR38827.1_160;	K00639	kbl,	GCAT;	glycine	C-acetyltransferase	[EC:2.3.1.29]
D	lcl|SIZZ01000001.1_prot_TBR40632.1_162;	K00060	tdh;	threonine	3-dehydrogenase	[EC:1.1.1.103]
D	lcl|SIZZ01000001.1_prot_TBR38840.1_176;	K00281	GLDC,	gcvP;	glycine	dehydrogenase	[EC:1.4.4.2]
D	lcl|SIZZ01000001.1_prot_TBR40341.1_1830;	K00605	gcvT,	AMT;	aminomethyltransferase	[EC:2.1.2.10]
D	lcl|SIZZ01000001.1_prot_TBR39232.1_604;	K00382	DLD,	lpd,	pdhD;	dihydrolipoamide	dehydrogenase	[EC:1.8.1.4]
D	lcl|SIZZ01000002.1_prot_TBR36803.1_2543;	K00382	DLD,	lpd,	pdhD;	dihydrolipoamide	dehydrogenase	[EC:1.8.1.4]
D	lcl|SIZZ01000001.1_prot_TBR40340.1_1829;	K02437	gcvH,	GCSH;	glycine	cleavage	system	H	protein
D	lcl|SIZZ01000002.1_prot_TBR36577.1_2289;	K00998	pssA;	CDP-diacylglycerol---serine	O-phosphatidyltransferase	[EC:2.7.8.8]
D	lcl|SIZZ01000001.1_prot_TBR40218.1_1694;	K17103	CHO1,	pssA;	CDP-diacylglycerol---serine	O-phosphatidyltransferase	[EC:2.7.8.8]
D	lcl|SIZZ01000001.1_prot_TBR40334.1_1823;	K00108	betA,	CHDH;	choline	dehydrogenase	[EC:1.1.99.1]
D	lcl|SIZZ01000001.1_prot_TBR39704.1_1131;	K14085	ALDH7A1;	aldehyde	dehydrogenase	family	7	member	A1	[EC:1.2.1.31	1.2.1.8	1.2.1.3]
D	lcl|SIZZ01000001.1_prot_TBR40374.1_1865;	K01697	CBS;	cystathionine	beta-synthase	[EC:4.2.1.22]
D	lcl|SIZZ01000001.1_prot_TBR40365.1_1856;	K01758	CTH;	cystathionine	gamma-lyase	[EC:4.4.1.1]
D	lcl|SIZZ01000001.1_prot_TBR40304.1_1792;	K01752	E4.3.1.17,	sdaA,	sdaB,	tdcG;	L-serine	dehydratase	[EC:4.3.1.17]
D	lcl|SIZZ01000003.1_prot_TBR36107.1_3152;	K01754	E4.3.1.19,	ilvA,	tdcB;	threonine	dehydratase	[EC:4.3.1.19]
D	lcl|SIZZ01000003.1_prot_TBR36032.1_3067;	K12235	SRR;	serine	racemase	[EC:5.1.1.18]
D	lcl|SIZZ01000001.1_prot_TBR38888.1_230;	K01695	trpA;	tryptophan	synthase	alpha	chain	[EC:4.2.1.20]
D	lcl|SIZZ01000001.1_prot_TBR38887.1_229;	K01696	trpB;	tryptophan	synthase	beta	chain	[EC:4.2.1.20]
C	270	Cysteine	and	methionine	metabolism	[PATH:ko00270]
D	lcl|SIZZ01000001.1_prot_TBR39243.1_615;	K01738	cysK;	cysteine	synthase	[EC:2.5.1.47]
D	lcl|SIZZ01000001.1_prot_TBR40365.1_1856;	K01758	CTH;	cystathionine	gamma-lyase	[EC:4.4.1.1]
D	lcl|SIZZ01000001.1_prot_TBR40374.1_1865;	K01697	CBS;	cystathionine	beta-synthase	[EC:4.2.1.22]
D	lcl|SIZZ01000001.1_prot_TBR40711.1_1157;	K00548	metH,	MTR;	5-methyltetrahydrofolate--homocysteine	methyltransferase	[EC:2.1.1.13]
D	lcl|SIZZ01000001.1_prot_TBR39728.1_1156;	K24042	yitJ;	methionine	synthase	/	methylenetetrahydrofolate	reductase	(NADH)	[EC:2.1.1.13	1.5.1.54]
D	lcl|SIZZ01000001.1_prot_TBR40606.1_2118;	K00549	metE;	5-methyltetrahydropteroyltriglutamate--homocysteine	methyltransferase	[EC:2.1.1.14]
D	lcl|SIZZ01000002.1_prot_TBR36947.1_2699;	K00789	metK,	MAT;	S-adenosylmethionine	synthetase	[EC:2.5.1.6]
D	lcl|SIZZ01000002.1_prot_TBR36842.1_2585;	K01611	speD,	AMD1;	S-adenosylmethionine	decarboxylase	[EC:4.1.1.50]
D	lcl|SIZZ01000004.1_prot_TBR35794.1_3454;	K00797	speE,	SRM,	SPE3;	spermidine	synthase	[EC:2.5.1.16]
D	lcl|SIZZ01000001.1_prot_TBR39652.1_1075;	K00772	mtaP,	MTAP;	5'-methylthioadenosine	phosphorylase	[EC:2.4.2.28]
D	lcl|SIZZ01000002.1_prot_TBR37035.1_2791;	K05810	LACC1,	yfiH;	purine-nucleoside/S-methyl-5'-thioadenosine	phosphorylase	/	adenosine	deaminase	[EC:2.4.2.1	2.4.2.28	3.5.4.4]
D	lcl|SIZZ01000001.1_prot_TBR39924.1_1369;	K12960	mtaD;	5-methylthioadenosine/S-adenosylhomocysteine	deaminase	[EC:3.5.4.31	3.5.4.28]
D	lcl|SIZZ01000001.1_prot_TBR39223.1_595;	K08963	mtnA;	methylthioribose-1-phosphate	isomerase	[EC:5.3.1.23]
D	lcl|SIZZ01000001.1_prot_TBR39112.1_473;	K08964	mtnB;	methylthioribulose-1-phosphate	dehydratase	[EC:4.2.1.109]
D	lcl|SIZZ01000001.1_prot_TBR40734.1_1489;	K08966	mtnX;	2-hydroxy-3-keto-5-methylthiopentenyl-1-phosphate	phosphatase	[EC:3.1.3.87]
D	lcl|SIZZ01000001.1_prot_TBR39110.1_471;	K09880	mtnC,	ENOPH1;	enolase-phosphatase	E1	[EC:3.1.3.77]
D	lcl|SIZZ01000001.1_prot_TBR39111.1_472;	K08967	mtnD,	mtnZ,	ADI1;	1,2-dihydroxy-3-keto-5-methylthiopentene	dioxygenase	[EC:1.13.11.53	1.13.11.54]
D	lcl|SIZZ01000002.1_prot_TBR36581.1_2293;	K00832	tyrB;	aromatic-amino-acid	transaminase	[EC:2.6.1.57]
D	lcl|SIZZ01000003.1_prot_TBR36256.1_3321;	K08968	msrC;	L-methionine	(R)-S-oxide	reductase	[EC:1.8.4.14]
D	lcl|SIZZ01000002.1_prot_TBR36937.1_2689;	K01251	E3.3.1.1,	ahcY;	adenosylhomocysteinase	[EC:3.3.1.1]
D	lcl|SIZZ01000002.1_prot_TBR37336.1_2863;	K00928	lysC;	aspartate	kinase	[EC:2.7.2.4]
D	lcl|SIZZ01000001.1_prot_TBR38881.1_223;	K00133	asd;	aspartate-semialdehyde	dehydrogenase	[EC:1.2.1.11]
D	lcl|SIZZ01000001.1_prot_TBR40306.1_1794;	K00003	hom;	homoserine	dehydrogenase	[EC:1.1.1.3]
D	lcl|SIZZ01000003.1_prot_TBR36371.1_3165;	K00003	hom;	homoserine	dehydrogenase	[EC:1.1.1.3]
D	lcl|SIZZ01000001.1_prot_TBR39138.1_501;	K00641	metX;	homoserine	O-acetyltransferase/O-succinyltransferase	[EC:2.3.1.31	2.3.1.46]
D	lcl|SIZZ01000001.1_prot_TBR40308.1_1796;	K00641	metX;	homoserine	O-acetyltransferase/O-succinyltransferase	[EC:2.3.1.31	2.3.1.46]
D	lcl|SIZZ01000001.1_prot_TBR40307.1_1795;	K01739	metB;	cystathionine	gamma-synthase	[EC:2.5.1.48]
D	lcl|SIZZ01000002.1_prot_TBR36933.1_2685;	K00826	E2.6.1.42,	ilvE;	branched-chain	amino	acid	aminotransferase	[EC:2.6.1.42]
D	lcl|SIZZ01000003.1_prot_TBR36114.1_3160;	K00826	E2.6.1.42,	ilvE;	branched-chain	amino	acid	aminotransferase	[EC:2.6.1.42]
D	lcl|SIZZ01000003.1_prot_TBR36261.1_3326;	K01919	gshA;	glutamate--cysteine	ligase	[EC:6.3.2.2]
D	lcl|SIZZ01000001.1_prot_TBR40190.1_1665;	K01920	gshB;	glutathione	synthase	[EC:6.3.2.3]
D	lcl|SIZZ01000001.1_prot_TBR39879.1_1321;	K00812	aspB;	aspartate	aminotransferase	[EC:2.6.1.1]
D	lcl|SIZZ01000001.1_prot_TBR39025.1_379;	K01011	TST,	MPST,	sseA;	thiosulfate/3-mercaptopyruvate	sulfurtransferase	[EC:2.8.1.1	2.8.1.2]
D	lcl|SIZZ01000001.1_prot_TBR39878.1_1320;	K00024	mdh;	malate	dehydrogenase	[EC:1.1.1.37]
D	lcl|SIZZ01000001.1_prot_TBR40304.1_1792;	K01752	E4.3.1.17,	sdaA,	sdaB,	tdcG;	L-serine	dehydratase	[EC:4.3.1.17]
D	lcl|SIZZ01000001.1_prot_TBR40074.1_1533;	K00058	serA,	PHGDH;	D-3-phosphoglycerate	dehydrogenase	/	2-oxoglutarate	reductase	[EC:1.1.1.95	1.1.1.399]
D	lcl|SIZZ01000001.1_prot_TBR39566.1_980;	K00831	serC,	PSAT1;	phosphoserine	aminotransferase	[EC:2.6.1.52]
C	280	Valine,	leucine	and	isoleucine	degradation	[PATH:ko00280]
D	lcl|SIZZ01000002.1_prot_TBR36933.1_2685;	K00826	E2.6.1.42,	ilvE;	branched-chain	amino	acid	aminotransferase	[EC:2.6.1.42]
D	lcl|SIZZ01000003.1_prot_TBR36114.1_3160;	K00826	E2.6.1.42,	ilvE;	branched-chain	amino	acid	aminotransferase	[EC:2.6.1.42]
D	lcl|SIZZ01000001.1_prot_TBR39791.1_1226;	K00263	E1.4.1.9;	leucine	dehydrogenase	[EC:1.4.1.9]
D	lcl|SIZZ01000001.1_prot_TBR40456.1_1957;	K00166	BCKDHA,	bkdA1;	2-oxoisovalerate	dehydrogenase	E1	component	alpha	subunit	[EC:1.2.4.4]
D	lcl|SIZZ01000001.1_prot_TBR40457.1_1958;	K00167	BCKDHB,	bkdA2;	2-oxoisovalerate	dehydrogenase	E1	component	beta	subunit	[EC:1.2.4.4]
D	lcl|SIZZ01000001.1_prot_TBR39428.1_826;	K09699	DBT,	bkdB;	2-oxoisovalerate	dehydrogenase	E2	component	(dihydrolipoyl	transacylase)	[EC:2.3.1.168]
D	lcl|SIZZ01000001.1_prot_TBR40458.1_1959;	K09699	DBT,	bkdB;	2-oxoisovalerate	dehydrogenase	E2	component	(dihydrolipoyl	transacylase)	[EC:2.3.1.168]
D	lcl|SIZZ01000001.1_prot_TBR39232.1_604;	K00382	DLD,	lpd,	pdhD;	dihydrolipoamide	dehydrogenase	[EC:1.8.1.4]
D	lcl|SIZZ01000002.1_prot_TBR36803.1_2543;	K00382	DLD,	lpd,	pdhD;	dihydrolipoamide	dehydrogenase	[EC:1.8.1.4]
D	lcl|SIZZ01000001.1_prot_TBR39726.1_1154;	K00248	ACADS,	bcd;	butyryl-CoA	dehydrogenase	[EC:1.3.8.1]
D	lcl|SIZZ01000002.1_prot_TBR37252.1_3026;	K00249	ACADM,	acd;	acyl-CoA	dehydrogenase	[EC:1.3.8.7]
D	lcl|SIZZ01000001.1_prot_TBR39810.1_1249;	K00253	IVD,	ivd;	isovaleryl-CoA	dehydrogenase	[EC:1.3.8.4]
D	lcl|SIZZ01000001.1_prot_TBR39671.1_1095;	K01782	fadJ;	3-hydroxyacyl-CoA	dehydrogenase	/	enoyl-CoA	hydratase	/	3-hydroxybutyryl-CoA	epimerase	[EC:1.1.1.35	4.2.1.17	5.1.2.3]
D	lcl|SIZZ01000001.1_prot_TBR39895.1_1338;	K08683	HSD17B10;	3-hydroxyacyl-CoA	dehydrogenase	/	3-hydroxy-2-methylbutyryl-CoA	dehydrogenase	[EC:1.1.1.35	1.1.1.178]
D	lcl|SIZZ01000001.1_prot_TBR39316.1_701;	K00632	fadA,	fadI;	acetyl-CoA	acyltransferase	[EC:2.3.1.16]
D	lcl|SIZZ01000001.1_prot_TBR39782.1_1216;	K01848	E5.4.99.2A,	mcmA1;	methylmalonyl-CoA	mutase,	N-terminal	domain	[EC:5.4.99.2]
D	lcl|SIZZ01000004.1_prot_TBR35790.1_3450;	K00020	HIBADH,	mmsB;	3-hydroxyisobutyrate	dehydrogenase	[EC:1.1.1.31]
D	lcl|SIZZ01000004.1_prot_TBR35960.1_3631;	K00128	ALDH;	aldehyde	dehydrogenase	(NAD+)	[EC:1.2.1.3]
D	lcl|SIZZ01000001.1_prot_TBR39704.1_1131;	K14085	ALDH7A1;	aldehyde	dehydrogenase	family	7	member	A1	[EC:1.2.1.31	1.2.1.8	1.2.1.3]
D	lcl|SIZZ01000001.1_prot_TBR39822.1_1262;	K01968	E6.4.1.4A;	3-methylcrotonyl-CoA	carboxylase	alpha	subunit	[EC:6.4.1.4]
D	lcl|SIZZ01000001.1_prot_TBR39814.1_1253;	K01969	E6.4.1.4B;	3-methylcrotonyl-CoA	carboxylase	beta	subunit	[EC:6.4.1.4]
D	lcl|SIZZ01000001.1_prot_TBR39820.1_1260;	K13766	liuC;	methylglutaconyl-CoA	hydratase	[EC:4.2.1.18]
D	lcl|SIZZ01000001.1_prot_TBR39823.1_1263;	K01640	HMGCL,	hmgL;	hydroxymethylglutaryl-CoA	lyase	[EC:4.1.3.4]
D	lcl|SIZZ01000001.1_prot_TBR40168.1_1641;	K01027	OXCT;	3-oxoacid	CoA-transferase	[EC:2.8.3.5]
D	lcl|SIZZ01000001.1_prot_TBR39812.1_1251;	K00626	ACAT,	atoB;	acetyl-CoA	C-acetyltransferase	[EC:2.3.1.9]
D	lcl|SIZZ01000003.1_prot_TBR36102.1_3147;	K00626	ACAT,	atoB;	acetyl-CoA	C-acetyltransferase	[EC:2.3.1.9]
C	290	Valine,	leucine	and	isoleucine	biosynthesis	[PATH:ko00290]
D	lcl|SIZZ01000003.1_prot_TBR36107.1_3152;	K01754	E4.3.1.19,	ilvA,	tdcB;	threonine	dehydratase	[EC:4.3.1.19]
D	lcl|SIZZ01000003.1_prot_TBR36113.1_3159;	K01703	leuC,	IPMI-L;	3-isopropylmalate/(R)-2-methylmalate	dehydratase	large	subunit	[EC:4.2.1.33	4.2.1.35]
D	lcl|SIZZ01000003.1_prot_TBR36112.1_3158;	K01704	leuD,	IPMI-S;	3-isopropylmalate/(R)-2-methylmalate	dehydratase	small	subunit	[EC:4.2.1.33	4.2.1.35]
D	lcl|SIZZ01000003.1_prot_TBR36111.1_3157;	K00052	leuB,	IMDH;	3-isopropylmalate	dehydrogenase	[EC:1.1.1.85]
D	lcl|SIZZ01000001.1_prot_TBR39081.1_441;	K01652	E2.2.1.6L,	ilvB,	ilvG,	ilvI;	acetolactate	synthase	I/II/III	large	subunit	[EC:2.2.1.6]
D	lcl|SIZZ01000003.1_prot_TBR36369.1_3154;	K01652	E2.2.1.6L,	ilvB,	ilvG,	ilvI;	acetolactate	synthase	I/II/III	large	subunit	[EC:2.2.1.6]
D	lcl|SIZZ01000003.1_prot_TBR36108.1_3153;	K01653	E2.2.1.6S,	ilvH,	ilvN;	acetolactate	synthase	I/III	small	subunit	[EC:2.2.1.6]
D	lcl|SIZZ01000003.1_prot_TBR36109.1_3155;	K00053	ilvC;	ketol-acid	reductoisomerase	[EC:1.1.1.86]
D	lcl|SIZZ01000003.1_prot_TBR36110.1_3156;	K01687	ilvD;	dihydroxy-acid	dehydratase	[EC:4.2.1.9]
D	lcl|SIZZ01000002.1_prot_TBR36933.1_2685;	K00826	E2.6.1.42,	ilvE;	branched-chain	amino	acid	aminotransferase	[EC:2.6.1.42]
D	lcl|SIZZ01000003.1_prot_TBR36114.1_3160;	K00826	E2.6.1.42,	ilvE;	branched-chain	amino	acid	aminotransferase	[EC:2.6.1.42]
D	lcl|SIZZ01000001.1_prot_TBR39791.1_1226;	K00263	E1.4.1.9;	leucine	dehydrogenase	[EC:1.4.1.9]
D	lcl|SIZZ01000002.1_prot_TBR36777.1_2514;	K14260	alaA;	alanine-synthesizing	transaminase	[EC:2.6.1.66	2.6.1.2]
D	lcl|SIZZ01000003.1_prot_TBR36115.1_3161;	K01649	leuA,	IMS;	2-isopropylmalate	synthase	[EC:2.3.3.13]
C	300	Lysine	biosynthesis	[PATH:ko00300]
D	lcl|SIZZ01000001.1_prot_TBR40306.1_1794;	K00003	hom;	homoserine	dehydrogenase	[EC:1.1.1.3]
D	lcl|SIZZ01000003.1_prot_TBR36371.1_3165;	K00003	hom;	homoserine	dehydrogenase	[EC:1.1.1.3]
D	lcl|SIZZ01000002.1_prot_TBR37336.1_2863;	K00928	lysC;	aspartate	kinase	[EC:2.7.2.4]
D	lcl|SIZZ01000001.1_prot_TBR38881.1_223;	K00133	asd;	aspartate-semialdehyde	dehydrogenase	[EC:1.2.1.11]
D	lcl|SIZZ01000001.1_prot_TBR39005.1_358;	K01714	dapA;	4-hydroxy-tetrahydrodipicolinate	synthase	[EC:4.3.3.7]
D	lcl|SIZZ01000001.1_prot_TBR39290.1_673;	K00215	dapB;	4-hydroxy-tetrahydrodipicolinate	reductase	[EC:1.17.1.8]
D	lcl|SIZZ01000002.1_prot_TBR36804.1_2544;	K00215	dapB;	4-hydroxy-tetrahydrodipicolinate	reductase	[EC:1.17.1.8]
D	lcl|SIZZ01000001.1_prot_TBR38766.1_93;	K00674	dapD;	2,3,4,5-tetrahydropyridine-2,6-dicarboxylate	N-succinyltransferase	[EC:2.3.1.117]
D	lcl|SIZZ01000003.1_prot_TBR36353.1_3427;	K00821	argD;	acetylornithine/N-succinyldiaminopimelate	aminotransferase	[EC:2.6.1.11	2.6.1.17]
D	lcl|SIZZ01000001.1_prot_TBR38770.1_97;	K01439	dapE;	succinyl-diaminopimelate	desuccinylase	[EC:3.5.1.18]
D	lcl|SIZZ01000004.1_prot_TBR35890.1_3557;	K01778	dapF;	diaminopimelate	epimerase	[EC:5.1.1.7]
D	lcl|SIZZ01000002.1_prot_TBR36824.1_2566;	K01586	lysA;	diaminopimelate	decarboxylase	[EC:4.1.1.20]
D	lcl|SIZZ01000002.1_prot_TBR36976.1_2731;	K01928	murE;	UDP-N-acetylmuramoyl-L-alanyl-D-glutamate--2,6-diaminopimelate	ligase	[EC:6.3.2.13]
D	lcl|SIZZ01000002.1_prot_TBR36977.1_2732;	K01929	murF;	UDP-N-acetylmuramoyl-tripeptide--D-alanyl-D-alanine	ligase	[EC:6.3.2.10]
C	310	Lysine	degradation	[PATH:ko00310]
D	lcl|SIZZ01000001.1_prot_TBR39704.1_1131;	K14085	ALDH7A1;	aldehyde	dehydrogenase	family	7	member	A1	[EC:1.2.1.31	1.2.1.8	1.2.1.3]
D	lcl|SIZZ01000001.1_prot_TBR39233.1_605;	K00658	DLST,	sucB;	2-oxoglutarate	dehydrogenase	E2	component	(dihydrolipoamide	succinyltransferase)	[EC:2.3.1.61]
D	lcl|SIZZ01000001.1_prot_TBR39232.1_604;	K00382	DLD,	lpd,	pdhD;	dihydrolipoamide	dehydrogenase	[EC:1.8.1.4]
D	lcl|SIZZ01000002.1_prot_TBR36803.1_2543;	K00382	DLD,	lpd,	pdhD;	dihydrolipoamide	dehydrogenase	[EC:1.8.1.4]
D	lcl|SIZZ01000001.1_prot_TBR39717.1_1145;	K00252	GCDH,	gcdH;	glutaryl-CoA	dehydrogenase	[EC:1.3.8.6]
D	lcl|SIZZ01000001.1_prot_TBR39671.1_1095;	K01782	fadJ;	3-hydroxyacyl-CoA	dehydrogenase	/	enoyl-CoA	hydratase	/	3-hydroxybutyryl-CoA	epimerase	[EC:1.1.1.35	4.2.1.17	5.1.2.3]
D	lcl|SIZZ01000001.1_prot_TBR39812.1_1251;	K00626	ACAT,	atoB;	acetyl-CoA	C-acetyltransferase	[EC:2.3.1.9]
D	lcl|SIZZ01000003.1_prot_TBR36102.1_3147;	K00626	ACAT,	atoB;	acetyl-CoA	C-acetyltransferase	[EC:2.3.1.9]
D	lcl|SIZZ01000002.1_prot_TBR37090.1_2853;	K09186	MLL1;	[histone	H3]-lysine4	N-trimethyltransferase	MLL1	[EC:2.1.1.354]
D	lcl|SIZZ01000004.1_prot_TBR35960.1_3631;	K00128	ALDH;	aldehyde	dehydrogenase	(NAD+)	[EC:1.2.1.3]
C	220	Arginine	biosynthesis	[PATH:ko00220]
D	lcl|SIZZ01000001.1_prot_TBR39913.1_1356;	K00611	OTC,	argF,	argI;	ornithine	carbamoyltransferase	[EC:2.1.3.3]
D	lcl|SIZZ01000001.1_prot_TBR39910.1_1353;	K01940	argG,	ASS1;	argininosuccinate	synthase	[EC:6.3.4.5]
D	lcl|SIZZ01000001.1_prot_TBR39905.1_1348;	K01755	argH,	ASL;	argininosuccinate	lyase	[EC:4.3.2.1]
D	lcl|SIZZ01000001.1_prot_TBR40465.1_1966;	K01476	E3.5.3.1,	rocF,	arg;	arginase	[EC:3.5.3.1]
D	lcl|SIZZ01000004.1_prot_TBR35804.1_3465;	K01915	glnA,	GLUL;	glutamine	synthetase	[EC:6.3.1.2]
D	lcl|SIZZ01000001.1_prot_TBR39722.1_1150;	K15371	GDH2;	glutamate	dehydrogenase	[EC:1.4.1.2]
D	lcl|SIZZ01000001.1_prot_TBR39879.1_1321;	K00812	aspB;	aspartate	aminotransferase	[EC:2.6.1.1]
D	lcl|SIZZ01000002.1_prot_TBR36777.1_2514;	K14260	alaA;	alanine-synthesizing	transaminase	[EC:2.6.1.66	2.6.1.2]
D	lcl|SIZZ01000001.1_prot_TBR39906.1_1349;	K00145	argC;	N-acetyl-gamma-glutamyl-phosphate	reductase	[EC:1.2.1.38]
D	lcl|SIZZ01000001.1_prot_TBR39907.1_1350;	K12659	ARG56;	N-acetyl-gamma-glutamyl-phosphate	reductase	/	acetylglutamate	kinase	[EC:1.2.1.38	2.7.2.8]
D	lcl|SIZZ01000003.1_prot_TBR36353.1_3427;	K00821	argD;	acetylornithine/N-succinyldiaminopimelate	aminotransferase	[EC:2.6.1.11	2.6.1.17]
D	lcl|SIZZ01000001.1_prot_TBR39908.1_1351;	K01438	argE;	acetylornithine	deacetylase	[EC:3.5.1.16]
C	330	Arginine	and	proline	metabolism	[PATH:ko00330]
D	lcl|SIZZ01000001.1_prot_TBR39372.1_760;	K01584	adiA;	arginine	decarboxylase	[EC:4.1.1.19]
D	lcl|SIZZ01000004.1_prot_TBR35970.1_3641;	K01584	adiA;	arginine	decarboxylase	[EC:4.1.1.19]
D	lcl|SIZZ01000001.1_prot_TBR39371.1_759;	K01585	speA;	arginine	decarboxylase	[EC:4.1.1.19]
D	lcl|SIZZ01000004.1_prot_TBR35793.1_3453;	K01585	speA;	arginine	decarboxylase	[EC:4.1.1.19]
D	lcl|SIZZ01000001.1_prot_TBR39548.1_961;	K10536	aguA;	agmatine	deiminase	[EC:3.5.3.12]
D	lcl|SIZZ01000001.1_prot_TBR39549.1_962;	K12251	aguB;	N-carbamoylputrescine	amidase	[EC:3.5.1.53]
D	lcl|SIZZ01000001.1_prot_TBR39374.1_762;	K01581	E4.1.1.17,	ODC1,	speC,	speF;	ornithine	decarboxylase	[EC:4.1.1.17]
D	lcl|SIZZ01000004.1_prot_TBR35794.1_3454;	K00797	speE,	SRM,	SPE3;	spermidine	synthase	[EC:2.5.1.16]
D	lcl|SIZZ01000002.1_prot_TBR36842.1_2585;	K01611	speD,	AMD1;	S-adenosylmethionine	decarboxylase	[EC:4.1.1.50]
D	lcl|SIZZ01000004.1_prot_TBR35960.1_3631;	K00128	ALDH;	aldehyde	dehydrogenase	(NAD+)	[EC:1.2.1.3]
D	lcl|SIZZ01000001.1_prot_TBR39704.1_1131;	K14085	ALDH7A1;	aldehyde	dehydrogenase	family	7	member	A1	[EC:1.2.1.31	1.2.1.8	1.2.1.3]
D	lcl|SIZZ01000004.1_prot_TBR35781.1_3440;	K00657	speG,	SAT;	diamine	N-acetyltransferase	[EC:2.3.1.57]
D	lcl|SIZZ01000001.1_prot_TBR39312.1_696;	K09471	puuB,	ordL;	gamma-glutamylputrescine	oxidase	[EC:1.4.3.-]
D	lcl|SIZZ01000001.1_prot_TBR40465.1_1966;	K01476	E3.5.3.1,	rocF,	arg;	arginase	[EC:3.5.3.1]
D	lcl|SIZZ01000001.1_prot_TBR40201.1_1676;	K00286	proC;	pyrroline-5-carboxylate	reductase	[EC:1.5.1.2]
D	lcl|SIZZ01000002.1_prot_TBR36664.1_2384;	K13821	putA;	RHH-type	transcriptional	regulator,	proline	utilization	regulon	repressor	/	proline	dehydrogenase	/	delta	1-pyrroline-5-carboxylate	dehydrogenase	[EC:1.5.5.2	1.2.1.88]
D	lcl|SIZZ01000001.1_prot_TBR40627.1_116;	K01259	pip;	proline	iminopeptidase	[EC:3.4.11.5]
D	lcl|SIZZ01000001.1_prot_TBR40072.1_1531;	K01259	pip;	proline	iminopeptidase	[EC:3.4.11.5]
D	lcl|SIZZ01000002.1_prot_TBR37285.1_2307;	K01259	pip;	proline	iminopeptidase	[EC:3.4.11.5]
D	lcl|SIZZ01000003.1_prot_TBR36339.1_3412;	K00472	P4HA;	prolyl	4-hydroxylase	[EC:1.14.11.2]
D	lcl|SIZZ01000001.1_prot_TBR39879.1_1321;	K00812	aspB;	aspartate	aminotransferase	[EC:2.6.1.1]
C	340	Histidine	metabolism	[PATH:ko00340]
D	lcl|SIZZ01000001.1_prot_TBR39101.1_462;	K00765	hisG;	ATP	phosphoribosyltransferase	[EC:2.4.2.17]
D	lcl|SIZZ01000001.1_prot_TBR39108.1_469;	K11755	hisIE;	phosphoribosyl-AMP	cyclohydrolase	/	phosphoribosyl-ATP	pyrophosphohydrolase	[EC:3.5.4.19	3.6.1.31]
D	lcl|SIZZ01000001.1_prot_TBR39106.1_467;	K01814	hisA;	phosphoribosylformimino-5-aminoimidazole	carboxamide	ribotide	isomerase	[EC:5.3.1.16]
D	lcl|SIZZ01000001.1_prot_TBR39105.1_466;	K02501	hisH;	imidazole	glycerol-phosphate	synthase	subunit	HisH	[EC:4.3.2.10]
D	lcl|SIZZ01000001.1_prot_TBR39107.1_468;	K02500	hisF;	imidazole	glycerol-phosphate	synthase	subunit	HisF	[EC:4.3.2.10]
D	lcl|SIZZ01000001.1_prot_TBR39104.1_465;	K01089	hisB;	imidazoleglycerol-phosphate	dehydratase	/	histidinol-phosphatase	[EC:4.2.1.19	3.1.3.15]
D	lcl|SIZZ01000001.1_prot_TBR39103.1_464;	K00817	hisC;	histidinol-phosphate	aminotransferase	[EC:2.6.1.9]
D	lcl|SIZZ01000001.1_prot_TBR40180.1_1653;	K05602	hisN;	histidinol-phosphatase	[EC:3.1.3.15]
D	lcl|SIZZ01000001.1_prot_TBR39102.1_463;	K00013	hisD;	histidinol	dehydrogenase	[EC:1.1.1.23]
D	lcl|SIZZ01000001.1_prot_TBR39098.1_459;	K01745	hutH,	HAL;	histidine	ammonia-lyase	[EC:4.3.1.3]
D	lcl|SIZZ01000001.1_prot_TBR38920.1_262;	K01712	hutU,	UROC1;	urocanate	hydratase	[EC:4.2.1.49]
D	lcl|SIZZ01000001.1_prot_TBR38903.1_245;	K01468	hutI,	AMDHD1;	imidazolonepropionase	[EC:3.5.2.7]
D	lcl|SIZZ01000001.1_prot_TBR38906.1_248;	K05603	hutF;	formimidoylglutamate	deiminase	[EC:3.5.3.13]
D	lcl|SIZZ01000001.1_prot_TBR39948.1_1395;	K01458	hutG;	N-formylglutamate	deformylase	[EC:3.5.1.68]
D	lcl|SIZZ01000004.1_prot_TBR35960.1_3631;	K00128	ALDH;	aldehyde	dehydrogenase	(NAD+)	[EC:1.2.1.3]
D	lcl|SIZZ01000001.1_prot_TBR39704.1_1131;	K14085	ALDH7A1;	aldehyde	dehydrogenase	family	7	member	A1	[EC:1.2.1.31	1.2.1.8	1.2.1.3]
D	lcl|SIZZ01000001.1_prot_TBR38819.1_152;	K18911	egtD;	L-histidine	Nalpha-methyltransferase	[EC:2.1.1.44]
D	lcl|SIZZ01000001.1_prot_TBR38818.1_151;	K18912	egtB;	gamma-glutamyl	hercynylcysteine	S-oxide	synthase	[EC:1.14.99.50]
C	350	Tyrosine	metabolism	[PATH:ko00350]
D	lcl|SIZZ01000001.1_prot_TBR39879.1_1321;	K00812	aspB;	aspartate	aminotransferase	[EC:2.6.1.1]
D	lcl|SIZZ01000001.1_prot_TBR39103.1_464;	K00817	hisC;	histidinol-phosphate	aminotransferase	[EC:2.6.1.9]
D	lcl|SIZZ01000002.1_prot_TBR36581.1_2293;	K00832	tyrB;	aromatic-amino-acid	transaminase	[EC:2.6.1.57]
D	lcl|SIZZ01000001.1_prot_TBR40452.1_1953;	K00457	HPD,	hppD;	4-hydroxyphenylpyruvate	dioxygenase	[EC:1.13.11.27]
D	lcl|SIZZ01000001.1_prot_TBR40450.1_1951;	K00451	HGD,	hmgA;	homogentisate	1,2-dioxygenase	[EC:1.13.11.5]
D	lcl|SIZZ01000001.1_prot_TBR40449.1_1949;	K16171	faaH;	fumarylacetoacetate	(FAA)	hydrolase	[EC:3.7.1.2]
D	lcl|SIZZ01000002.1_prot_TBR36631.1_2346;	K00121	frmA,	ADH5,	adhC;	S-(hydroxymethyl)glutathione	dehydrogenase	/	alcohol	dehydrogenase	[EC:1.1.1.284	1.1.1.1]
D	lcl|SIZZ01000001.1_prot_TBR39490.1_897;	K13953	adhP;	alcohol	dehydrogenase,	propanol-preferring	[EC:1.1.1.1]
D	lcl|SIZZ01000002.1_prot_TBR36688.1_2414;	K13953	adhP;	alcohol	dehydrogenase,	propanol-preferring	[EC:1.1.1.1]
D	lcl|SIZZ01000001.1_prot_TBR40379.1_1871;	K01801	nagL;	maleylpyruvate	isomerase	[EC:5.2.1.4]
D	lcl|SIZZ01000002.1_prot_TBR36900.1_2647;	K16165	nagK;	fumarylpyruvate	hydrolase	[EC:3.7.1.20]
C	360	Phenylalanine	metabolism	[PATH:ko00360]
D	lcl|SIZZ01000004.1_prot_TBR35832.1_3495;	K00500	phhA,	PAH;	phenylalanine-4-hydroxylase	[EC:1.14.16.1]
D	lcl|SIZZ01000003.1_prot_TBR36179.1_3237;	K01912	paaK;	phenylacetate-CoA	ligase	[EC:6.2.1.30]
D	lcl|SIZZ01000001.1_prot_TBR39879.1_1321;	K00812	aspB;	aspartate	aminotransferase	[EC:2.6.1.1]
D	lcl|SIZZ01000001.1_prot_TBR39103.1_464;	K00817	hisC;	histidinol-phosphate	aminotransferase	[EC:2.6.1.9]
D	lcl|SIZZ01000002.1_prot_TBR36581.1_2293;	K00832	tyrB;	aromatic-amino-acid	transaminase	[EC:2.6.1.57]
D	lcl|SIZZ01000001.1_prot_TBR40452.1_1953;	K00457	HPD,	hppD;	4-hydroxyphenylpyruvate	dioxygenase	[EC:1.13.11.27]
D	lcl|SIZZ01000001.1_prot_TBR39950.1_1397;	K00285	dadA;	D-amino-acid	dehydrogenase	[EC:1.4.5.1]
D	lcl|SIZZ01000003.1_prot_TBR36086.1_3131;	K03782	katG;	catalase-peroxidase	[EC:1.11.1.21]
D	lcl|SIZZ01000001.1_prot_TBR40041.1_1495;	K05710	hcaC;	3-phenylpropionate/trans-cinnamate	dioxygenase	ferredoxin	component
C	380	Tryptophan	metabolism	[PATH:ko00380]
D	lcl|SIZZ01000001.1_prot_TBR40455.1_1956;	K00453	TDO2,	kynA;	tryptophan	2,3-dioxygenase	[EC:1.13.11.11]
D	lcl|SIZZ01000001.1_prot_TBR39149.1_512;	K00486	KMO;	kynurenine	3-monooxygenase	[EC:1.14.13.9]
D	lcl|SIZZ01000001.1_prot_TBR39903.1_1346;	K01556	KYNU,	kynU;	kynureninase	[EC:3.7.1.3]
D	lcl|SIZZ01000001.1_prot_TBR39118.1_479;	K00452	HAAO;	3-hydroxyanthranilate	3,4-dioxygenase	[EC:1.13.11.6]
D	lcl|SIZZ01000001.1_prot_TBR39901.1_1344;	K03392	ACMSD;	aminocarboxymuconate-semialdehyde	decarboxylase	[EC:4.1.1.45]
D	lcl|SIZZ01000001.1_prot_TBR40728.1_1391;	K23234	ALDH8A1;	aminomuconate-semialdehyde	dehydrogenase	[EC:1.2.1.32]
D	lcl|SIZZ01000001.1_prot_TBR39233.1_605;	K00658	DLST,	sucB;	2-oxoglutarate	dehydrogenase	E2	component	(dihydrolipoamide	succinyltransferase)	[EC:2.3.1.61]
D	lcl|SIZZ01000001.1_prot_TBR39232.1_604;	K00382	DLD,	lpd,	pdhD;	dihydrolipoamide	dehydrogenase	[EC:1.8.1.4]
D	lcl|SIZZ01000002.1_prot_TBR36803.1_2543;	K00382	DLD,	lpd,	pdhD;	dihydrolipoamide	dehydrogenase	[EC:1.8.1.4]
D	lcl|SIZZ01000001.1_prot_TBR39717.1_1145;	K00252	GCDH,	gcdH;	glutaryl-CoA	dehydrogenase	[EC:1.3.8.6]
D	lcl|SIZZ01000001.1_prot_TBR39671.1_1095;	K01782	fadJ;	3-hydroxyacyl-CoA	dehydrogenase	/	enoyl-CoA	hydratase	/	3-hydroxybutyryl-CoA	epimerase	[EC:1.1.1.35	4.2.1.17	5.1.2.3]
D	lcl|SIZZ01000001.1_prot_TBR39812.1_1251;	K00626	ACAT,	atoB;	acetyl-CoA	C-acetyltransferase	[EC:2.3.1.9]
D	lcl|SIZZ01000003.1_prot_TBR36102.1_3147;	K00626	ACAT,	atoB;	acetyl-CoA	C-acetyltransferase	[EC:2.3.1.9]
D	lcl|SIZZ01000004.1_prot_TBR35960.1_3631;	K00128	ALDH;	aldehyde	dehydrogenase	(NAD+)	[EC:1.2.1.3]
D	lcl|SIZZ01000001.1_prot_TBR39704.1_1131;	K14085	ALDH7A1;	aldehyde	dehydrogenase	family	7	member	A1	[EC:1.2.1.31	1.2.1.8	1.2.1.3]
D	lcl|SIZZ01000003.1_prot_TBR36086.1_3131;	K03782	katG;	catalase-peroxidase	[EC:1.11.1.21]
C	400	Phenylalanine,	tyrosine	and	tryptophan	biosynthesis	[PATH:ko00400]
D	lcl|SIZZ01000001.1_prot_TBR38705.1_30;	K01626	E2.5.1.54,	aroF,	aroG,	aroH;	3-deoxy-7-phosphoheptulonate	synthase	[EC:2.5.1.54]
D	lcl|SIZZ01000001.1_prot_TBR38941.1_286;	K01626	E2.5.1.54,	aroF,	aroG,	aroH;	3-deoxy-7-phosphoheptulonate	synthase	[EC:2.5.1.54]
D	lcl|SIZZ01000001.1_prot_TBR40209.1_1685;	K01735	aroB;	3-dehydroquinate	synthase	[EC:4.2.3.4]
D	lcl|SIZZ01000002.1_prot_TBR36764.1_2500;	K03786	aroQ,	qutE;	3-dehydroquinate	dehydratase	II	[EC:4.2.1.10]
D	lcl|SIZZ01000004.1_prot_TBR35899.1_3566;	K00014	aroE;	shikimate	dehydrogenase	[EC:1.1.1.25]
D	lcl|SIZZ01000001.1_prot_TBR40208.1_1684;	K00891	aroK,	aroL;	shikimate	kinase	[EC:2.7.1.71]
D	lcl|SIZZ01000001.1_prot_TBR39564.1_978;	K00800	aroA;	3-phosphoshikimate	1-carboxyvinyltransferase	[EC:2.5.1.19]
D	lcl|SIZZ01000001.1_prot_TBR38879.1_221;	K01736	aroC;	chorismate	synthase	[EC:4.2.3.5]
D	lcl|SIZZ01000002.1_prot_TBR36819.1_2560;	K01657	trpE;	anthranilate	synthase	component	I	[EC:4.1.3.27]
D	lcl|SIZZ01000002.1_prot_TBR36835.1_2578;	K01658	trpG;	anthranilate	synthase	component	II	[EC:4.1.3.27]
D	lcl|SIZZ01000002.1_prot_TBR36836.1_2579;	K00766	trpD;	anthranilate	phosphoribosyltransferase	[EC:2.4.2.18]
D	lcl|SIZZ01000001.1_prot_TBR38885.1_227;	K01817	trpF;	phosphoribosylanthranilate	isomerase	[EC:5.3.1.24]
D	lcl|SIZZ01000002.1_prot_TBR36837.1_2580;	K01609	trpC;	indole-3-glycerol	phosphate	synthase	[EC:4.1.1.48]
D	lcl|SIZZ01000001.1_prot_TBR38888.1_230;	K01695	trpA;	tryptophan	synthase	alpha	chain	[EC:4.2.1.20]
D	lcl|SIZZ01000001.1_prot_TBR38887.1_229;	K01696	trpB;	tryptophan	synthase	beta	chain	[EC:4.2.1.20]
D	lcl|SIZZ01000001.1_prot_TBR39565.1_979;	K14170	pheA;	chorismate	mutase	/	prephenate	dehydratase	[EC:5.4.99.5	4.2.1.51]
D	lcl|SIZZ01000001.1_prot_TBR39879.1_1321;	K00812	aspB;	aspartate	aminotransferase	[EC:2.6.1.1]
D	lcl|SIZZ01000001.1_prot_TBR39103.1_464;	K00817	hisC;	histidinol-phosphate	aminotransferase	[EC:2.6.1.9]
D	lcl|SIZZ01000002.1_prot_TBR36581.1_2293;	K00832	tyrB;	aromatic-amino-acid	transaminase	[EC:2.6.1.57]
D	lcl|SIZZ01000004.1_prot_TBR35832.1_3495;	K00500	phhA,	PAH;	phenylalanine-4-hydroxylase	[EC:1.14.16.1]
B
B	9106	Metabolism	of	other	amino	acids
C	410	beta-Alanine	metabolism	[PATH:ko00410]
D	lcl|SIZZ01000001.1_prot_TBR39014.1_367;	K01579	panD;	aspartate	1-decarboxylase	[EC:4.1.1.11]
D	lcl|SIZZ01000001.1_prot_TBR40035.1_1488;	K00823	puuE;	4-aminobutyrate	aminotransferase	[EC:2.6.1.19]
D	lcl|SIZZ01000004.1_prot_TBR35960.1_3631;	K00128	ALDH;	aldehyde	dehydrogenase	(NAD+)	[EC:1.2.1.3]
D	lcl|SIZZ01000001.1_prot_TBR39704.1_1131;	K14085	ALDH7A1;	aldehyde	dehydrogenase	family	7	member	A1	[EC:1.2.1.31	1.2.1.8	1.2.1.3]
D	lcl|SIZZ01000001.1_prot_TBR39013.1_366;	K01918	panC;	pantoate--beta-alanine	ligase	[EC:6.3.2.1]
D	lcl|SIZZ01000001.1_prot_TBR39671.1_1095;	K01782	fadJ;	3-hydroxyacyl-CoA	dehydrogenase	/	enoyl-CoA	hydratase	/	3-hydroxybutyryl-CoA	epimerase	[EC:1.1.1.35	4.2.1.17	5.1.2.3]
D	lcl|SIZZ01000001.1_prot_TBR39726.1_1154;	K00248	ACADS,	bcd;	butyryl-CoA	dehydrogenase	[EC:1.3.8.1]
C	430	Taurine	and	hypotaurine	metabolism	[PATH:ko00430]
D	lcl|SIZZ01000002.1_prot_TBR37172.1_2940;	K00681	ggt;	gamma-glutamyltranspeptidase	/	glutathione	hydrolase	[EC:2.3.2.2	3.4.19.13]
D	lcl|SIZZ01000001.1_prot_TBR39421.1_818;	K03119	tauD;	taurine	dioxygenase	[EC:1.14.11.17]
D	lcl|SIZZ01000001.1_prot_TBR39628.1_1051;	K00259	ald;	alanine	dehydrogenase	[EC:1.4.1.1]
D	lcl|SIZZ01000001.1_prot_TBR39722.1_1150;	K15371	GDH2;	glutamate	dehydrogenase	[EC:1.4.1.2]
C	440	Phosphonate	and	phosphinate	metabolism	[PATH:ko00440]
D	lcl|SIZZ01000004.1_prot_TBR35819.1_3481;	K09994	phnO;	(aminoalkyl)phosphonate	N-acetyltransferase	[EC:2.3.1.280]
C	450	Selenocompound	metabolism	[PATH:ko00450]
D	lcl|SIZZ01000001.1_prot_TBR40307.1_1795;	K01739	metB;	cystathionine	gamma-synthase	[EC:2.5.1.48]
D	lcl|SIZZ01000001.1_prot_TBR40711.1_1157;	K00548	metH,	MTR;	5-methyltetrahydrofolate--homocysteine	methyltransferase	[EC:2.1.1.13]
D	lcl|SIZZ01000001.1_prot_TBR39728.1_1156;	K24042	yitJ;	methionine	synthase	/	methylenetetrahydrofolate	reductase	(NADH)	[EC:2.1.1.13	1.5.1.54]
D	lcl|SIZZ01000001.1_prot_TBR40606.1_2118;	K00549	metE;	5-methyltetrahydropteroyltriglutamate--homocysteine	methyltransferase	[EC:2.1.1.14]
D	lcl|SIZZ01000001.1_prot_TBR40365.1_1856;	K01758	CTH;	cystathionine	gamma-lyase	[EC:4.4.1.1]
D	lcl|SIZZ01000001.1_prot_TBR40045.1_1499;	K11717	sufS;	cysteine	desulfurase	/	selenocysteine	lyase	[EC:2.8.1.7	4.4.1.16]
D	lcl|SIZZ01000001.1_prot_TBR39629.1_1052;	K00384	trxB,	TRR;	thioredoxin	reductase	(NADPH)	[EC:1.8.1.9]
D	lcl|SIZZ01000001.1_prot_TBR40342.1_1831;	K00955	cysNC;	bifunctional	enzyme	CysN/CysC	[EC:2.7.7.4	2.7.1.25]
D	lcl|SIZZ01000001.1_prot_TBR40343.1_1832;	K00957	cysD;	sulfate	adenylyltransferase	subunit	2	[EC:2.7.7.4]
D	lcl|SIZZ01000001.1_prot_TBR39240.1_612;	K00958	sat,	met3;	sulfate	adenylyltransferase	[EC:2.7.7.4]
D	lcl|SIZZ01000001.1_prot_TBR38858.1_196;	K01874	MARS,	metG;	methionyl-tRNA	synthetase	[EC:6.1.1.10]
C	460	Cyanoamino	acid	metabolism	[PATH:ko00460]
D	lcl|SIZZ01000002.1_prot_TBR37172.1_2940;	K00681	ggt;	gamma-glutamyltranspeptidase	/	glutathione	hydrolase	[EC:2.3.2.2	3.4.19.13]
D	lcl|SIZZ01000001.1_prot_TBR40752.1_1638;	K13051	ASRGL1,	iaaA;	L-asparaginase	/	beta-aspartyl-peptidase	[EC:3.5.1.1	3.4.19.5]
D	lcl|SIZZ01000002.1_prot_TBR37272.1_3048;	K13051	ASRGL1,	iaaA;	L-asparaginase	/	beta-aspartyl-peptidase	[EC:3.5.1.1	3.4.19.5]
D	lcl|SIZZ01000001.1_prot_TBR40257.1_1738;	K00600	glyA,	SHMT;	glycine	hydroxymethyltransferase	[EC:2.1.2.1]
D	lcl|SIZZ01000001.1_prot_TBR39794.1_1229;	K10814	hcnA;	hydrogen	cyanide	synthase	HcnA	[EC:1.4.99.5]
D	lcl|SIZZ01000001.1_prot_TBR39793.1_1228;	K10815	hcnB;	hydrogen	cyanide	synthase	HcnB	[EC:1.4.99.5]
D	lcl|SIZZ01000001.1_prot_TBR39792.1_1227;	K10816	hcnC;	hydrogen	cyanide	synthase	HcnC	[EC:1.4.99.5]
C	470	D-Amino	acid	metabolism	[PATH:ko00470]
D	lcl|SIZZ01000001.1_prot_TBR39935.1_1381;	K01775	alr;	alanine	racemase	[EC:5.1.1.1]
D	lcl|SIZZ01000002.1_prot_TBR36982.1_2737;	K01921	ddl;	D-alanine-D-alanine	ligase	[EC:6.3.2.4]
D	lcl|SIZZ01000002.1_prot_TBR37099.1_2865;	K01925	murD;	UDP-N-acetylmuramoylalanine--D-glutamate	ligase	[EC:6.3.2.9]
D	lcl|SIZZ01000003.1_prot_TBR36032.1_3067;	K12235	SRR;	serine	racemase	[EC:5.1.1.18]
D	lcl|SIZZ01000004.1_prot_TBR35890.1_3557;	K01778	dapF;	diaminopimelate	epimerase	[EC:5.1.1.7]
D	lcl|SIZZ01000002.1_prot_TBR36824.1_2566;	K01586	lysA;	diaminopimelate	decarboxylase	[EC:4.1.1.20]
D	lcl|SIZZ01000002.1_prot_TBR36832.1_2575;	K19746	dauA;	D-arginine	dehydrogenase	[EC:1.4.99.6]
D	lcl|SIZZ01000001.1_prot_TBR39950.1_1397;	K00285	dadA;	D-amino-acid	dehydrogenase	[EC:1.4.5.1]
C	480	Glutathione	metabolism	[PATH:ko00480]
D	lcl|SIZZ01000002.1_prot_TBR37172.1_2940;	K00681	ggt;	gamma-glutamyltranspeptidase	/	glutathione	hydrolase	[EC:2.3.2.2	3.4.19.13]
D	lcl|SIZZ01000003.1_prot_TBR36261.1_3326;	K01919	gshA;	glutamate--cysteine	ligase	[EC:6.3.2.2]
D	lcl|SIZZ01000001.1_prot_TBR40190.1_1665;	K01920	gshB;	glutathione	synthase	[EC:6.3.2.3]
D	lcl|SIZZ01000001.1_prot_TBR40290.1_1776;	K01255	CARP,	pepA;	leucyl	aminopeptidase	[EC:3.4.11.1]
D	lcl|SIZZ01000001.1_prot_TBR40605.1_2117;	K01255	CARP,	pepA;	leucyl	aminopeptidase	[EC:3.4.11.1]
D	lcl|SIZZ01000002.1_prot_TBR37080.1_2843;	K01256	pepN;	aminopeptidase	N	[EC:3.4.11.2]
D	lcl|SIZZ01000003.1_prot_TBR36030.1_3065;	K01256	pepN;	aminopeptidase	N	[EC:3.4.11.2]
D	lcl|SIZZ01000001.1_prot_TBR38980.1_331;	K00799	GST,	gst;	glutathione	S-transferase	[EC:2.5.1.18]
D	lcl|SIZZ01000001.1_prot_TBR39868.1_1308;	K00799	GST,	gst;	glutathione	S-transferase	[EC:2.5.1.18]
D	lcl|SIZZ01000001.1_prot_TBR39968.1_1415;	K00799	GST,	gst;	glutathione	S-transferase	[EC:2.5.1.18]
D	lcl|SIZZ01000001.1_prot_TBR40017.1_1469;	K00799	GST,	gst;	glutathione	S-transferase	[EC:2.5.1.18]
D	lcl|SIZZ01000001.1_prot_TBR40425.1_1924;	K00799	GST,	gst;	glutathione	S-transferase	[EC:2.5.1.18]
D	lcl|SIZZ01000002.1_prot_TBR36592.1_2304;	K00799	GST,	gst;	glutathione	S-transferase	[EC:2.5.1.18]
D	lcl|SIZZ01000002.1_prot_TBR36755.1_2489;	K00799	GST,	gst;	glutathione	S-transferase	[EC:2.5.1.18]
D	lcl|SIZZ01000004.1_prot_TBR35839.1_3502;	K00799	GST,	gst;	glutathione	S-transferase	[EC:2.5.1.18]
D	lcl|SIZZ01000001.1_prot_TBR39949.1_1396;	K00383	GSR,	gor;	glutathione	reductase	(NADPH)	[EC:1.8.1.7]
D	lcl|SIZZ01000003.1_prot_TBR36213.1_3275;	K00031	IDH1,	IDH2,	icd;	isocitrate	dehydrogenase	[EC:1.1.1.42]
D	lcl|SIZZ01000002.1_prot_TBR36599.1_2312;	K00033	PGD,	gnd,	gntZ;	6-phosphogluconate	dehydrogenase	[EC:1.1.1.44	1.1.1.343]
D	lcl|SIZZ01000004.1_prot_TBR35949.1_3618;	K00036	G6PD,	zwf;	glucose-6-phosphate	1-dehydrogenase	[EC:1.1.1.49	1.1.1.363]
D	lcl|SIZZ01000001.1_prot_TBR38960.1_306;	K00432	gpx,	btuE,	bsaA;	glutathione	peroxidase	[EC:1.11.1.9]
D	lcl|SIZZ01000001.1_prot_TBR39226.1_598;	K24136	pgdX;	glutathione-dependent	peroxiredoxin	[EC:1.11.1.27]
D	lcl|SIZZ01000001.1_prot_TBR39374.1_762;	K01581	E4.1.1.17,	ODC1,	speC,	speF;	ornithine	decarboxylase	[EC:4.1.1.17]
D	lcl|SIZZ01000004.1_prot_TBR35794.1_3454;	K00797	speE,	SRM,	SPE3;	spermidine	synthase	[EC:2.5.1.16]
B
B	9107	Glycan	biosynthesis	and	metabolism
C	510	N-Glycan	biosynthesis	[PATH:ko00510]
C	513	Various	types	of	N-glycan	biosynthesis	[PATH:ko00513]
D	lcl|SIZZ01000003.1_prot_TBR36374.1_3178;	K12373	HEXA_B;	hexosaminidase	[EC:3.2.1.52]
C	512	Mucin	type	O-glycan	biosynthesis	[PATH:ko00512]
C	515	Mannose	type	O-glycan	biosynthesis	[PATH:ko00515]
C	514	Other	types	of	O-glycan	biosynthesis	[PATH:ko00514]
D	lcl|SIZZ01000002.1_prot_TBR37260.1_3034;	K09667	OGT;	protein	O-GlcNAc	transferase	[EC:2.4.1.255]
C	532	Glycosaminoglycan	biosynthesis	-	chondroitin	sulfate	/	dermatan	sulfate	[PATH:ko00532]
C	534	Glycosaminoglycan	biosynthesis	-	heparan	sulfate	/	heparin	[PATH:ko00534]
C	533	Glycosaminoglycan	biosynthesis	-	keratan	sulfate	[PATH:ko00533]
C	531	Glycosaminoglycan	degradation	[PATH:ko00531]
D	lcl|SIZZ01000001.1_prot_TBR39655.1_1078;	K01207	nagZ;	beta-N-acetylhexosaminidase	[EC:3.2.1.52]
D	lcl|SIZZ01000001.1_prot_TBR40713.1_1168;	K01217	IDUA;	L-iduronidase	[EC:3.2.1.76]
D	lcl|SIZZ01000003.1_prot_TBR36374.1_3178;	K12373	HEXA_B;	hexosaminidase	[EC:3.2.1.52]
C	563	Glycosylphosphatidylinositol	(GPI)-anchor	biosynthesis	[PATH:ko00563]
C	601	Glycosphingolipid	biosynthesis	-	lacto	and	neolacto	series	[PATH:ko00601]
C	603	Glycosphingolipid	biosynthesis	-	globo	and	isoglobo	series	[PATH:ko00603]
D	lcl|SIZZ01000003.1_prot_TBR36374.1_3178;	K12373	HEXA_B;	hexosaminidase	[EC:3.2.1.52]
C	604	Glycosphingolipid	biosynthesis	-	ganglio	series	[PATH:ko00604]
D	lcl|SIZZ01000003.1_prot_TBR36374.1_3178;	K12373	HEXA_B;	hexosaminidase	[EC:3.2.1.52]
C	540	Lipopolysaccharide	biosynthesis	[PATH:ko00540]
D	lcl|SIZZ01000001.1_prot_TBR38752.1_78;	K00677	lpxA;	UDP-N-acetylglucosamine	acyltransferase	[EC:2.3.1.129]
D	lcl|SIZZ01000002.1_prot_TBR36986.1_2741;	K02535	lpxC;	UDP-3-O-[3-hydroxymyristoyl]	N-acetylglucosamine	deacetylase	[EC:3.5.1.108]
D	lcl|SIZZ01000001.1_prot_TBR38754.1_80;	K02536	lpxD;	UDP-3-O-[3-hydroxymyristoyl]	glucosamine	N-acyltransferase	[EC:2.3.1.191]
D	lcl|SIZZ01000001.1_prot_TBR38989.1_341;	K03269	lpxH;	UDP-2,3-diacylglucosamine	hydrolase	[EC:3.6.1.54]
D	lcl|SIZZ01000001.1_prot_TBR38751.1_77;	K00748	lpxB;	lipid-A-disaccharide	synthase	[EC:2.4.1.182]
D	lcl|SIZZ01000001.1_prot_TBR39169.1_537;	K00912	lpxK;	tetraacyldisaccharide	4'-kinase	[EC:2.7.1.130]
D	lcl|SIZZ01000002.1_prot_TBR37135.1_2902;	K06041	kdsD,	kpsF;	arabinose-5-phosphate	isomerase	[EC:5.3.1.13]
D	lcl|SIZZ01000001.1_prot_TBR39122.1_483;	K01627	kdsA;	2-dehydro-3-deoxyphosphooctonate	aldolase	(KDO	8-P	synthase)	[EC:2.5.1.55]
D	lcl|SIZZ01000002.1_prot_TBR37134.1_2901;	K03270	kdsC;	3-deoxy-D-manno-octulosonate	8-phosphate	phosphatase	(KDO	8-P	phosphatase)	[EC:3.1.3.45]
D	lcl|SIZZ01000001.1_prot_TBR39563.1_977;	K00979	kdsB;	3-deoxy-manno-octulosonate	cytidylyltransferase	(CMP-KDO	synthetase)	[EC:2.7.7.38]
D	lcl|SIZZ01000003.1_prot_TBR36326.1_3399;	K02527	kdtA,	waaA;	3-deoxy-D-manno-octulosonic-acid	transferase	[EC:2.4.99.12	2.4.99.13	2.4.99.14	2.4.99.15]
D	lcl|SIZZ01000002.1_prot_TBR36499.1_2206;	K02517	lpxL,	htrB;	Kdo2-lipid	IVA	lauroyltransferase/acyltransferase	[EC:2.3.1.241	2.3.1.-]
D	lcl|SIZZ01000003.1_prot_TBR36325.1_3398;	K02517	lpxL,	htrB;	Kdo2-lipid	IVA	lauroyltransferase/acyltransferase	[EC:2.3.1.241	2.3.1.-]
D	lcl|SIZZ01000001.1_prot_TBR39001.1_353;	K12979	lpxO;	beta-hydroxylase	[EC:1.14.11.-]
D	lcl|SIZZ01000001.1_prot_TBR39745.1_1176;	K07264	arnT,	pmrK;	4-amino-4-deoxy-L-arabinose	transferase	[EC:2.4.2.43]
D	lcl|SIZZ01000002.1_prot_TBR36509.1_2216;	K07264	arnT,	pmrK;	4-amino-4-deoxy-L-arabinose	transferase	[EC:2.4.2.43]
D	lcl|SIZZ01000001.1_prot_TBR39172.1_541;	K11211	kdkA;	3-deoxy-D-manno-octulosonic	acid	kinase	[EC:2.7.1.166]
D	lcl|SIZZ01000001.1_prot_TBR40767.1_1851;	K03271	gmhA,	lpcA;	D-sedoheptulose	7-phosphate	isomerase	[EC:5.3.1.28]
D	lcl|SIZZ01000001.1_prot_TBR40360.1_1849;	K03273	gmhB;	D-glycero-D-manno-heptose	1,7-bisphosphate	phosphatase	[EC:3.1.3.82	3.1.3.83]
D	lcl|SIZZ01000001.1_prot_TBR40362.1_1852;	K07031	hddA;	D-glycero-alpha-D-manno-heptose-7-phosphate	kinase	[EC:2.7.1.168]
C	542	O-Antigen	repeat	unit	biosynthesis	[PATH:ko00542]
C	541	O-Antigen	nucleotide	sugar	biosynthesis	[PATH:ko00541]
D	lcl|SIZZ01000001.1_prot_TBR39309.1_693;	K00963	UGP2,	galU,	galF;	UTP--glucose-1-phosphate	uridylyltransferase	[EC:2.7.7.9]
D	lcl|SIZZ01000002.1_prot_TBR36731.1_2463;	K01784	galE,	GALE;	UDP-glucose	4-epimerase	[EC:5.1.3.2]
D	lcl|SIZZ01000003.1_prot_TBR36144.1_3200;	K01784	galE,	GALE;	UDP-glucose	4-epimerase	[EC:5.1.3.2]
D	lcl|SIZZ01000001.1_prot_TBR40144.1_1613;	K01854	glf;	UDP-galactopyranose	mutase	[EC:5.4.99.9]
D	lcl|SIZZ01000001.1_prot_TBR39674.1_1098;	K00012	UGDH,	ugd;	UDPglucose	6-dehydrogenase	[EC:1.1.1.22]
D	lcl|SIZZ01000001.1_prot_TBR40090.1_1550;	K08679	GAE,	cap1J;	UDP-glucuronate	4-epimerase	[EC:5.1.3.6]
D	lcl|SIZZ01000003.1_prot_TBR36190.1_3249;	K08679	GAE,	cap1J;	UDP-glucuronate	4-epimerase	[EC:5.1.3.6]
D	lcl|SIZZ01000001.1_prot_TBR40368.1_1859;	K00973	rfbA,	rmlA,	rffH;	glucose-1-phosphate	thymidylyltransferase	[EC:2.7.7.24]
D	lcl|SIZZ01000001.1_prot_TBR39008.1_361;	K01710	rfbB,	rmlB,	rffG;	dTDP-glucose	4,6-dehydratase	[EC:4.2.1.46]
D	lcl|SIZZ01000001.1_prot_TBR40367.1_1858;	K01710	rfbB,	rmlB,	rffG;	dTDP-glucose	4,6-dehydratase	[EC:4.2.1.46]
D	lcl|SIZZ01000001.1_prot_TBR40369.1_1860;	K01790	rfbC,	rmlC;	dTDP-4-dehydrorhamnose	3,5-epimerase	[EC:5.1.3.13]
D	lcl|SIZZ01000001.1_prot_TBR40370.1_1861;	K00067	rfbD,	rmlD;	dTDP-4-dehydrorhamnose	reductase	[EC:1.1.1.133]
D	lcl|SIZZ01000002.1_prot_TBR36712.1_2441;	K00523	ascD,	ddhD,	rfbI;	CDP-4-dehydro-6-deoxyglucose	reductase,	E3	[EC:1.17.1.1]
D	lcl|SIZZ01000001.1_prot_TBR40371.1_1862;	K16011	algA,	xanB,	rfbA,	wbpW,	pslB;	mannose-1-phosphate	guanylyltransferase	/	mannose-6-phosphate	isomerase	[EC:2.7.7.13	5.3.1.8]
D	lcl|SIZZ01000001.1_prot_TBR40684.1_840;	K00971	manC,	cpsB;	mannose-1-phosphate	guanylyltransferase	[EC:2.7.7.13]
D	lcl|SIZZ01000002.1_prot_TBR37280.1_2249;	K04042	glmU;	bifunctional	UDP-N-acetylglucosamine	pyrophosphorylase	/	glucosamine-1-phosphate	N-acetyltransferase	[EC:2.7.7.23	2.3.1.157]
D	lcl|SIZZ01000001.1_prot_TBR39308.1_692;	K24300	wbpM,	wbgZ,	aatA;	UDP-N-acetylglucosamine	4,6-dehydratase	[EC:4.2.1.135]
D	lcl|SIZZ01000001.1_prot_TBR40053.1_1510;	K13015	wbpA;	UDP-N-acetyl-D-glucosamine	dehydrogenase	[EC:1.1.1.136]
D	lcl|SIZZ01000003.1_prot_TBR36191.1_3250;	K22926	tviB,	vipA;	UDP-N-acetylglucosamine	6-dehydrogenase	[EC:1.1.1.136]
D	lcl|SIZZ01000001.1_prot_TBR39471.1_877;	K13017	wbpE,	wlbC;	UDP-2-acetamido-2-deoxy-ribo-hexuluronate	aminotransferase	[EC:2.6.1.98]
C	550	Peptidoglycan	biosynthesis	[PATH:ko00550]
D	lcl|SIZZ01000002.1_prot_TBR37137.1_2904;	K00790	murA;	UDP-N-acetylglucosamine	1-carboxyvinyltransferase	[EC:2.5.1.7]
D	lcl|SIZZ01000001.1_prot_TBR40710.1_1135;	K00075	murB;	UDP-N-acetylmuramate	dehydrogenase	[EC:1.3.1.98]
D	lcl|SIZZ01000002.1_prot_TBR36981.1_2736;	K01924	murC;	UDP-N-acetylmuramate--alanine	ligase	[EC:6.3.2.8]
D	lcl|SIZZ01000002.1_prot_TBR37099.1_2865;	K01925	murD;	UDP-N-acetylmuramoylalanine--D-glutamate	ligase	[EC:6.3.2.9]
D	lcl|SIZZ01000002.1_prot_TBR36976.1_2731;	K01928	murE;	UDP-N-acetylmuramoyl-L-alanyl-D-glutamate--2,6-diaminopimelate	ligase	[EC:6.3.2.13]
D	lcl|SIZZ01000002.1_prot_TBR36982.1_2737;	K01921	ddl;	D-alanine-D-alanine	ligase	[EC:6.3.2.4]
D	lcl|SIZZ01000002.1_prot_TBR36977.1_2732;	K01929	murF;	UDP-N-acetylmuramoyl-tripeptide--D-alanyl-D-alanine	ligase	[EC:6.3.2.10]
D	lcl|SIZZ01000001.1_prot_TBR38758.1_85;	K00806	uppS;	undecaprenyl	diphosphate	synthase	[EC:2.5.1.31]
D	lcl|SIZZ01000004.1_prot_TBR35805.1_3466;	K06153	bacA;	undecaprenyl-diphosphatase	[EC:3.6.1.27]
D	lcl|SIZZ01000001.1_prot_TBR39766.1_1199;	K19302	bcrC;	undecaprenyl-diphosphatase	[EC:3.6.1.27]
D	lcl|SIZZ01000002.1_prot_TBR36978.1_2733;	K01000	mraY;	phospho-N-acetylmuramoyl-pentapeptide-transferase	[EC:2.7.8.13]
D	lcl|SIZZ01000002.1_prot_TBR36980.1_2735;	K02563	murG;	UDP-N-acetylglucosamine--N-acetylmuramyl-(pentapeptide)	pyrophosphoryl-undecaprenol	N-acetylglucosamine	transferase	[EC:2.4.1.227]
D	lcl|SIZZ01000001.1_prot_TBR40330.1_1819;	K03814	mtgA;	monofunctional	glycosyltransferase	[EC:2.4.1.129]
D	lcl|SIZZ01000002.1_prot_TBR36884.1_2629;	K05366	mrcA;	penicillin-binding	protein	1A	[EC:2.4.1.129	3.4.16.4]
D	lcl|SIZZ01000002.1_prot_TBR37113.1_2879;	K05365	mrcB;	penicillin-binding	protein	1B	[EC:2.4.1.129	3.4.16.4]
D	lcl|SIZZ01000001.1_prot_TBR39311.1_695;	K05367	pbpC;	penicillin-binding	protein	1C	[EC:2.4.1.129]
D	lcl|SIZZ01000001.1_prot_TBR40790.1_2131;	K05515	mrdA;	penicillin-binding	protein	2	[EC:3.4.16.4]
D	lcl|SIZZ01000002.1_prot_TBR37325.1_2730;	K03587	ftsI;	cell	division	protein	FtsI	(penicillin-binding	protein	3)	[EC:3.4.16.4]
D	lcl|SIZZ01000001.1_prot_TBR40612.1_2124;	K07258	dacC,	dacA,	dacD;	serine-type	D-Ala-D-Ala	carboxypeptidase	(penicillin-binding	protein	5/6)	[EC:3.4.16.4]
D	lcl|SIZZ01000001.1_prot_TBR38961.1_307;	K07259	dacB;	serine-type	D-Ala-D-Ala	carboxypeptidase/endopeptidase	(penicillin-binding	protein	4)	[EC:3.4.16.4	3.4.21.-]
C	511	Other	glycan	degradation	[PATH:ko00511]
D	lcl|SIZZ01000003.1_prot_TBR36374.1_3178;	K12373	HEXA_B;	hexosaminidase	[EC:3.2.1.52]
D	lcl|SIZZ01000001.1_prot_TBR39650.1_1073;	K01444	AGA,	aspG;	N4-(beta-N-acetylglucosaminyl)-L-asparaginase	[EC:3.5.1.26]
C	571	Lipoarabinomannan	(LAM)	biosynthesis	[PATH:ko00571]
D	lcl|SIZZ01000001.1_prot_TBR40147.1_1616;	K13668	pimB;	phosphatidyl-myo-inositol	dimannoside	synthase	[EC:2.4.1.346]
C	572	Arabinogalactan	biosynthesis	-	Mycobacterium	[PATH:ko00572]
B
B	9108	Metabolism	of	cofactors	and	vitamins
C	730	Thiamine	metabolism	[PATH:ko00730]
D	lcl|SIZZ01000003.1_prot_TBR36331.1_3404;	K03147	thiC;	phosphomethylpyrimidine	synthase	[EC:4.1.99.17]
D	lcl|SIZZ01000001.1_prot_TBR39002.1_354;	K00941	thiD;	hydroxymethylpyrimidine/phosphomethylpyrimidine	kinase	[EC:2.7.1.49	2.7.4.7]
D	lcl|SIZZ01000002.1_prot_TBR37083.1_2846;	K01662	dxs;	1-deoxy-D-xylulose-5-phosphate	synthase	[EC:2.2.1.7]
D	lcl|SIZZ01000002.1_prot_TBR36925.1_2676;	K03149	thiG;	thiazole	synthase	[EC:2.8.1.10]
D	lcl|SIZZ01000003.1_prot_TBR36355.1_3431;	K00788	thiE;	thiamine-phosphate	pyrophosphorylase	[EC:2.5.1.3]
D	lcl|SIZZ01000001.1_prot_TBR40247.1_1725;	K00946	thiL;	thiamine-monophosphate	kinase	[EC:2.7.4.16]
D	lcl|SIZZ01000001.1_prot_TBR40483.1_1987;	K06949	rsgA,	engC;	ribosome	biogenesis	GTPase	/	thiamine	phosphate	phosphatase	[EC:3.6.1.-	3.1.3.100]
D	lcl|SIZZ01000002.1_prot_TBR36778.1_2515;	K06949	rsgA,	engC;	ribosome	biogenesis	GTPase	/	thiamine	phosphate	phosphatase	[EC:3.6.1.-	3.1.3.100]
D	lcl|SIZZ01000003.1_prot_TBR36128.1_3179;	K01077	E3.1.3.1,	phoA,	phoB;	alkaline	phosphatase	[EC:3.1.3.1]
D	lcl|SIZZ01000003.1_prot_TBR36347.1_3421;	K00939	adk,	AK;	adenylate	kinase	[EC:2.7.4.3]
C	740	Riboflavin	metabolism	[PATH:ko00740]
D	lcl|SIZZ01000001.1_prot_TBR40251.1_1731;	K14652	ribBA;	3,4-dihydroxy	2-butanone	4-phosphate	synthase	/	GTP	cyclohydrolase	II	[EC:4.1.99.12	3.5.4.25]
D	lcl|SIZZ01000001.1_prot_TBR40760.1_1735;	K11752	ribD;	diaminohydroxyphosphoribosylaminopyrimidine	deaminase	/	5-amino-6-(5-phosphoribosylamino)uracil	reductase	[EC:3.5.4.26	1.1.1.193]
D	lcl|SIZZ01000001.1_prot_TBR40788.1_2116;	K20862	yigB;	FMN	hydrolase	/	5-amino-6-(5-phospho-D-ribitylamino)uracil	phosphatase	[EC:3.1.3.102	3.1.3.104]
D	lcl|SIZZ01000001.1_prot_TBR40249.1_1729;	K00794	ribH,	RIB4;	6,7-dimethyl-8-ribityllumazine	synthase	[EC:2.5.1.78]
D	lcl|SIZZ01000001.1_prot_TBR40252.1_1732;	K00793	ribE,	RIB5;	riboflavin	synthase	[EC:2.5.1.9]
D	lcl|SIZZ01000001.1_prot_TBR39037.1_393;	K11753	ribF;	riboflavin	kinase	/	FMN	adenylyltransferase	[EC:2.7.1.26	2.7.7.2]
D	lcl|SIZZ01000002.1_prot_TBR36663.1_2383;	K09474	phoN;	acid	phosphatase	(class	A)	[EC:3.1.3.2]
D	lcl|SIZZ01000001.1_prot_TBR38916.1_258;	K01513	ENPP1_3,	CD203;	ectonucleotide	pyrophosphatase/phosphodiesterase	family	member	2022-01-03	[EC:3.1.4.1	3.6.1.9]
D	lcl|SIZZ01000002.1_prot_TBR37237.1_3009;	K01515	nudF;	ADP-ribose	pyrophosphatase	[EC:3.6.1.13	3.6.1.-]
C	750	Vitamin	B6	metabolism	[PATH:ko00750]
D	lcl|SIZZ01000001.1_prot_TBR40755.1_1680;	K00275	pdxH,	PNPO;	pyridoxamine	5'-phosphate	oxidase	[EC:1.4.3.5]
D	lcl|SIZZ01000001.1_prot_TBR39291.1_674;	K00868	pdxK,	pdxY;	pyridoxine	kinase	[EC:2.7.1.35]
D	lcl|SIZZ01000001.1_prot_TBR39045.1_401;	K05275	E1.1.1.65;	pyridoxine	4-dehydrogenase	[EC:1.1.1.65]
D	lcl|SIZZ01000001.1_prot_TBR39566.1_980;	K00831	serC,	PSAT1;	phosphoserine	aminotransferase	[EC:2.6.1.52]
D	lcl|SIZZ01000002.1_prot_TBR36993.1_2748;	K00097	pdxA;	4-hydroxythreonine-4-phosphate	dehydrogenase	[EC:1.1.1.262]
D	lcl|SIZZ01000004.1_prot_TBR35863.1_3529;	K03474	pdxJ;	pyridoxine	5-phosphate	synthase	[EC:2.6.99.2]
D	lcl|SIZZ01000003.1_prot_TBR36117.1_3163;	K01733	thrC;	threonine	synthase	[EC:4.2.3.1]
C	760	Nicotinate	and	nicotinamide	metabolism	[PATH:ko00760]
D	lcl|SIZZ01000001.1_prot_TBR40116.1_1581;	K00767	nadC,	QPRT;	nicotinate-nucleotide	pyrophosphorylase	(carboxylating)	[EC:2.4.2.19]
D	lcl|SIZZ01000001.1_prot_TBR38956.1_302;	K00763	pncB,	NAPRT1;	nicotinate	phosphoribosyltransferase	[EC:6.3.4.21]
D	lcl|SIZZ01000001.1_prot_TBR39720.1_1148;	K01081	E3.1.3.5;	5'-nucleotidase	[EC:3.1.3.5]
D	lcl|SIZZ01000001.1_prot_TBR39129.1_491;	K03787	surE;	5'/3'-nucleotidase	[EC:3.1.3.5	3.1.3.6]
D	lcl|SIZZ01000002.1_prot_TBR36880.1_2625;	K01240	URH1;	uridine	nucleosidase	[EC:3.2.2.3]
D	lcl|SIZZ01000001.1_prot_TBR39982.1_1430;	K00969	nadD;	nicotinate-nucleotide	adenylyltransferase	[EC:2.7.7.18]
D	lcl|SIZZ01000001.1_prot_TBR38916.1_258;	K01513	ENPP1_3,	CD203;	ectonucleotide	pyrophosphatase/phosphodiesterase	family	member	2022-01-03	[EC:3.1.4.1	3.6.1.9]
D	lcl|SIZZ01000001.1_prot_TBR40177.1_1650;	K04765	mazG;	nucleoside	triphosphate	diphosphatase	[EC:3.6.1.9]
D	lcl|SIZZ01000002.1_prot_TBR36523.1_2230;	K03426	E3.6.1.22,	NUDT12,	nudC;	NAD+	diphosphatase	[EC:3.6.1.22]
D	lcl|SIZZ01000002.1_prot_TBR37032.1_2788;	K01916	nadE;	NAD+	synthase	[EC:6.3.1.5]
D	lcl|SIZZ01000001.1_prot_TBR38982.1_333;	K03743	pncC;	nicotinamide-nucleotide	amidase	[EC:3.5.1.42]
D	lcl|SIZZ01000001.1_prot_TBR40509.1_2015;	K08281	pncA;	nicotinamidase/pyrazinamidase	[EC:3.5.1.19	3.5.1.-]
D	lcl|SIZZ01000001.1_prot_TBR39333.1_718;	K12410	npdA;	NAD-dependent	deacetylase	[EC:2.3.1.286]
D	lcl|SIZZ01000001.1_prot_TBR39721.1_1149;	K00858	ppnK,	NADK;	NAD+	kinase	[EC:2.7.1.23]
D	lcl|SIZZ01000002.1_prot_TBR37242.1_3015;	K00324	pntA;	H+-translocating	NAD(P)	transhydrogenase	subunit	alpha	[EC:1.6.1.2	7.1.1.1]
D	lcl|SIZZ01000002.1_prot_TBR37245.1_3019;	K00324	pntA;	H+-translocating	NAD(P)	transhydrogenase	subunit	alpha	[EC:1.6.1.2	7.1.1.1]
D	lcl|SIZZ01000002.1_prot_TBR37246.1_3020;	K00325	pntB;	H+-translocating	NAD(P)	transhydrogenase	subunit	beta	[EC:1.6.1.2	7.1.1.1]
C	770	Pantothenate	and	CoA	biosynthesis	[PATH:ko00770]
D	lcl|SIZZ01000001.1_prot_TBR39081.1_441;	K01652	E2.2.1.6L,	ilvB,	ilvG,	ilvI;	acetolactate	synthase	I/II/III	large	subunit	[EC:2.2.1.6]
D	lcl|SIZZ01000003.1_prot_TBR36369.1_3154;	K01652	E2.2.1.6L,	ilvB,	ilvG,	ilvI;	acetolactate	synthase	I/II/III	large	subunit	[EC:2.2.1.6]
D	lcl|SIZZ01000003.1_prot_TBR36108.1_3153;	K01653	E2.2.1.6S,	ilvH,	ilvN;	acetolactate	synthase	I/III	small	subunit	[EC:2.2.1.6]
D	lcl|SIZZ01000003.1_prot_TBR36109.1_3155;	K00053	ilvC;	ketol-acid	reductoisomerase	[EC:1.1.1.86]
D	lcl|SIZZ01000003.1_prot_TBR36110.1_3156;	K01687	ilvD;	dihydroxy-acid	dehydratase	[EC:4.2.1.9]
D	lcl|SIZZ01000001.1_prot_TBR39012.1_365;	K00606	panB;	3-methyl-2-oxobutanoate	hydroxymethyltransferase	[EC:2.1.2.11]
D	lcl|SIZZ01000001.1_prot_TBR39998.1_1449;	K00077	panE,	apbA;	2-dehydropantoate	2-reductase	[EC:1.1.1.169]
D	lcl|SIZZ01000002.1_prot_TBR37310.1_2538;	K00077	panE,	apbA;	2-dehydropantoate	2-reductase	[EC:1.1.1.169]
D	lcl|SIZZ01000001.1_prot_TBR39013.1_366;	K01918	panC;	pantoate--beta-alanine	ligase	[EC:6.3.2.1]
D	lcl|SIZZ01000001.1_prot_TBR40468.1_1969;	K01947	birA-coaX;	biotin---[acetyl-CoA-carboxylase]	ligase	/	type	III	pantothenate	kinase	[EC:6.3.4.15	2.7.1.33]
D	lcl|SIZZ01000004.1_prot_TBR35785.1_3445;	K13038	coaBC,	dfp;	phosphopantothenoylcysteine	decarboxylase	/	phosphopantothenate---cysteine	ligase	[EC:4.1.1.36	6.3.2.5]
D	lcl|SIZZ01000001.1_prot_TBR38916.1_258;	K01513	ENPP1_3,	CD203;	ectonucleotide	pyrophosphatase/phosphodiesterase	family	member	2022-01-03	[EC:3.1.4.1	3.6.1.9]
D	lcl|SIZZ01000001.1_prot_TBR40177.1_1650;	K04765	mazG;	nucleoside	triphosphate	diphosphatase	[EC:3.6.1.9]
D	lcl|SIZZ01000002.1_prot_TBR37164.1_2932;	K00954	E2.7.7.3A,	coaD,	kdtB;	pantetheine-phosphate	adenylyltransferase	[EC:2.7.7.3]
D	lcl|SIZZ01000001.1_prot_TBR40152.1_1621;	K00859	coaE;	dephospho-CoA	kinase	[EC:2.7.1.24]
D	lcl|SIZZ01000004.1_prot_TBR35862.1_3528;	K06133	LYS5,	acpT;	4'-phosphopantetheinyl	transferase	[EC:2.7.8.-]
D	lcl|SIZZ01000003.1_prot_TBR36205.1_3267;	K08682	acpH;	acyl	carrier	protein	phosphodiesterase	[EC:3.1.4.14]
D	lcl|SIZZ01000002.1_prot_TBR36933.1_2685;	K00826	E2.6.1.42,	ilvE;	branched-chain	amino	acid	aminotransferase	[EC:2.6.1.42]
D	lcl|SIZZ01000003.1_prot_TBR36114.1_3160;	K00826	E2.6.1.42,	ilvE;	branched-chain	amino	acid	aminotransferase	[EC:2.6.1.42]
D	lcl|SIZZ01000001.1_prot_TBR39014.1_367;	K01579	panD;	aspartate	1-decarboxylase	[EC:4.1.1.11]
D	lcl|SIZZ01000004.1_prot_TBR35960.1_3631;	K00128	ALDH;	aldehyde	dehydrogenase	(NAD+)	[EC:1.2.1.3]
C	780	Biotin	metabolism	[PATH:ko00780]
D	lcl|SIZZ01000003.1_prot_TBR36038.1_3077;	K02169	bioC;	malonyl-CoA	O-methyltransferase	[EC:2.1.1.197]
D	lcl|SIZZ01000001.1_prot_TBR39798.1_1235;	K00647	fabB;	3-oxoacyl-[acyl-carrier-protein]	synthase	I	[EC:2.3.1.41]
D	lcl|SIZZ01000001.1_prot_TBR39192.1_562;	K09458	fabF,	OXSM,	CEM1;	3-oxoacyl-[acyl-carrier-protein]	synthase	II	[EC:2.3.1.179]
D	lcl|SIZZ01000001.1_prot_TBR39797.1_1234;	K09458	fabF,	OXSM,	CEM1;	3-oxoacyl-[acyl-carrier-protein]	synthase	II	[EC:2.3.1.179]
D	lcl|SIZZ01000001.1_prot_TBR39190.1_560;	K00059	fabG,	OAR1;	3-oxoacyl-[acyl-carrier	protein]	reductase	[EC:1.1.1.100]
D	lcl|SIZZ01000001.1_prot_TBR39384.1_772;	K00059	fabG,	OAR1;	3-oxoacyl-[acyl-carrier	protein]	reductase	[EC:1.1.1.100]
D	lcl|SIZZ01000001.1_prot_TBR39489.1_896;	K00059	fabG,	OAR1;	3-oxoacyl-[acyl-carrier	protein]	reductase	[EC:1.1.1.100]
D	lcl|SIZZ01000001.1_prot_TBR39807.1_1246;	K00059	fabG,	OAR1;	3-oxoacyl-[acyl-carrier	protein]	reductase	[EC:1.1.1.100]
D	lcl|SIZZ01000001.1_prot_TBR39944.1_1390;	K00059	fabG,	OAR1;	3-oxoacyl-[acyl-carrier	protein]	reductase	[EC:1.1.1.100]
D	lcl|SIZZ01000001.1_prot_TBR38753.1_79;	K02372	fabZ;	3-hydroxyacyl-[acyl-carrier-protein]	dehydratase	[EC:4.2.1.59]
D	lcl|SIZZ01000001.1_prot_TBR39686.1_1112;	K00208	fabI;	enoyl-[acyl-carrier	protein]	reductase	I	[EC:1.3.1.9	1.3.1.10]
D	lcl|SIZZ01000003.1_prot_TBR36039.1_3078;	K02170	bioH;	pimeloyl-[acyl-carrier	protein]	methyl	ester	esterase	[EC:3.1.1.85]
D	lcl|SIZZ01000003.1_prot_TBR36041.1_3080;	K00652	bioF;	8-amino-7-oxononanoate	synthase	[EC:2.3.1.47]
D	lcl|SIZZ01000001.1_prot_TBR40182.1_1655;	K00833	bioA;	adenosylmethionine---8-amino-7-oxononanoate	aminotransferase	[EC:2.6.1.62]
D	lcl|SIZZ01000003.1_prot_TBR36257.1_3322;	K01935	bioD;	dethiobiotin	synthetase	[EC:6.3.3.3]
D	lcl|SIZZ01000003.1_prot_TBR36042.1_3081;	K01012	bioB;	biotin	synthase	[EC:2.8.1.6]
D	lcl|SIZZ01000001.1_prot_TBR40469.1_1970;	K03524	birA;	BirA	family	transcriptional	regulator,	biotin	operon	repressor	/	biotin---[acetyl-CoA-carboxylase]	ligase	[EC:6.3.4.15]
D	lcl|SIZZ01000001.1_prot_TBR40468.1_1969;	K01947	birA-coaX;	biotin---[acetyl-CoA-carboxylase]	ligase	/	type	III	pantothenate	kinase	[EC:6.3.4.15	2.7.1.33]
C	785	Lipoic	acid	metabolism	[PATH:ko00785]
D	lcl|SIZZ01000001.1_prot_TBR40610.1_2122;	K03801	lipB;	lipoyl(octanoyl)	transferase	[EC:2.3.1.181]
D	lcl|SIZZ01000001.1_prot_TBR40609.1_2121;	K03644	lipA,	LIAS,	LIP1,	LIP5;	lipoyl	synthase	[EC:2.8.1.8]
D	lcl|SIZZ01000001.1_prot_TBR38783.1_111;	K03800	lplA,	lplJ,	lipL1;	lipoate---protein	ligase	[EC:6.3.1.20]
C	790	Folate	biosynthesis	[PATH:ko00790]
D	lcl|SIZZ01000002.1_prot_TBR36704.1_2433;	K01495	GCH1,	folE;	GTP	cyclohydrolase	IA	[EC:3.5.4.16]
D	lcl|SIZZ01000001.1_prot_TBR39920.1_1364;	K09007	folE2;	GTP	cyclohydrolase	IB	[EC:3.5.4.16]
D	lcl|SIZZ01000003.1_prot_TBR36128.1_3179;	K01077	E3.1.3.1,	phoA,	phoB;	alkaline	phosphatase	[EC:3.1.3.1]
D	lcl|SIZZ01000002.1_prot_TBR36680.1_2403;	K01633	folB;	7,8-dihydroneopterin	aldolase/epimerase/oxygenase	[EC:4.1.2.25	5.1.99.8	1.13.11.81]
D	lcl|SIZZ01000001.1_prot_TBR39011.1_364;	K00950	folK;	2-amino-4-hydroxy-6-hydroxymethyldihydropteridine	diphosphokinase	[EC:2.7.6.3]
D	lcl|SIZZ01000002.1_prot_TBR36681.1_2405;	K00950	folK;	2-amino-4-hydroxy-6-hydroxymethyldihydropteridine	diphosphokinase	[EC:2.7.6.3]
D	lcl|SIZZ01000001.1_prot_TBR39603.1_1023;	K00796	folP;	dihydropteroate	synthase	[EC:2.5.1.15]
D	lcl|SIZZ01000001.1_prot_TBR40153.1_1623;	K00287	DHFR,	folA;	dihydrofolate	reductase	[EC:1.5.1.3]
D	lcl|SIZZ01000001.1_prot_TBR39086.1_446;	K11754	folC;	dihydrofolate	synthase	/	folylpolyglutamate	synthase	[EC:6.3.2.12	6.3.2.17]
D	lcl|SIZZ01000001.1_prot_TBR40251.1_1731;	K14652	ribBA;	3,4-dihydroxy	2-butanone	4-phosphate	synthase	/	GTP	cyclohydrolase	II	[EC:4.1.99.12	3.5.4.25]
D	lcl|SIZZ01000001.1_prot_TBR39193.1_563;	K01665	pabB;	para-aminobenzoate	synthetase	component	I	[EC:2.6.1.85]
D	lcl|SIZZ01000001.1_prot_TBR39194.1_564;	K02619	pabC;	4-amino-4-deoxychorismate	lyase	[EC:4.1.3.38]
D	lcl|SIZZ01000002.1_prot_TBR36530.1_2237;	K01737	queD,	ptpS,	PTS;	6-pyruvoyltetrahydropterin/6-carboxytetrahydropterin	synthase	[EC:4.2.3.12	4.1.2.50]
D	lcl|SIZZ01000001.1_prot_TBR39554.1_968;	K01724	PCBD,	phhB;	4a-hydroxytetrahydrobiopterin	dehydratase	[EC:4.2.1.96]
D	lcl|SIZZ01000004.1_prot_TBR35832.1_3495;	K00500	phhA,	PAH;	phenylalanine-4-hydroxylase	[EC:1.14.16.1]
D	lcl|SIZZ01000002.1_prot_TBR37063.1_2825;	K10026	queE;	7-carboxy-7-deazaguanine	synthase	[EC:4.3.99.3]
D	lcl|SIZZ01000002.1_prot_TBR37064.1_2826;	K06920	queC;	7-cyano-7-deazaguanine	synthase	[EC:6.3.4.20]
D	lcl|SIZZ01000003.1_prot_TBR36193.1_3252;	K06879	queF;	7-cyano-7-deazaguanine	reductase	[EC:1.7.1.13]
C	670	One	carbon	pool	by	folate	[PATH:ko00670]
D	lcl|SIZZ01000001.1_prot_TBR40153.1_1623;	K00287	DHFR,	folA;	dihydrofolate	reductase	[EC:1.5.1.3]
D	lcl|SIZZ01000001.1_prot_TBR39328.1_713;	K01491	folD;	methylenetetrahydrofolate	dehydrogenase	(NADP+)	/	methenyltetrahydrofolate	cyclohydrolase	[EC:1.5.1.5	3.5.4.9]
D	lcl|SIZZ01000001.1_prot_TBR40257.1_1738;	K00600	glyA,	SHMT;	glycine	hydroxymethyltransferase	[EC:2.1.2.1]
D	lcl|SIZZ01000002.1_prot_TBR37139.1_2906;	K11175	purN;	phosphoribosylglycinamide	formyltransferase	1	[EC:2.1.2.2]
D	lcl|SIZZ01000002.1_prot_TBR36757.1_2492;	K00602	purH;	phosphoribosylaminoimidazolecarboxamide	formyltransferase	/	IMP	cyclohydrolase	[EC:2.1.2.3	3.5.4.10]
D	lcl|SIZZ01000002.1_prot_TBR36511.1_2218;	K00604	MTFMT,	fmt;	methionyl-tRNA	formyltransferase	[EC:2.1.2.9]
D	lcl|SIZZ01000001.1_prot_TBR40341.1_1830;	K00605	gcvT,	AMT;	aminomethyltransferase	[EC:2.1.2.10]
D	lcl|SIZZ01000001.1_prot_TBR40711.1_1157;	K00548	metH,	MTR;	5-methyltetrahydrofolate--homocysteine	methyltransferase	[EC:2.1.1.13]
D	lcl|SIZZ01000001.1_prot_TBR39728.1_1156;	K24042	yitJ;	methionine	synthase	/	methylenetetrahydrofolate	reductase	(NADH)	[EC:2.1.1.13	1.5.1.54]
D	lcl|SIZZ01000001.1_prot_TBR40154.1_1624;	K00560	thyA,	TYMS;	thymidylate	synthase	[EC:2.1.1.45]
D	lcl|SIZZ01000002.1_prot_TBR36935.1_2687;	K00297	metF,	MTHFR;	methylenetetrahydrofolate	reductase	(NADH)	[EC:1.5.1.54]
D	lcl|SIZZ01000002.1_prot_TBR36853.1_2597;	K01934	MTHFS;	5-formyltetrahydrofolate	cyclo-ligase	[EC:6.3.3.2]
C	830	Retinol	metabolism	[PATH:ko00830]
D	lcl|SIZZ01000002.1_prot_TBR36631.1_2346;	K00121	frmA,	ADH5,	adhC;	S-(hydroxymethyl)glutathione	dehydrogenase	/	alcohol	dehydrogenase	[EC:1.1.1.284	1.1.1.1]
D	lcl|SIZZ01000001.1_prot_TBR39490.1_897;	K13953	adhP;	alcohol	dehydrogenase,	propanol-preferring	[EC:1.1.1.1]
D	lcl|SIZZ01000002.1_prot_TBR36688.1_2414;	K13953	adhP;	alcohol	dehydrogenase,	propanol-preferring	[EC:1.1.1.1]
C	860	Porphyrin	metabolism	[PATH:ko00860]
D	lcl|SIZZ01000001.1_prot_TBR38895.1_237;	K01885	EARS,	gltX;	glutamyl-tRNA	synthetase	[EC:6.1.1.17]
D	lcl|SIZZ01000002.1_prot_TBR37262.1_3036;	K02492	hemA;	glutamyl-tRNA	reductase	[EC:1.2.1.70]
D	lcl|SIZZ01000003.1_prot_TBR36354.1_3430;	K01845	hemL;	glutamate-1-semialdehyde	2,1-aminomutase	[EC:5.4.3.8]
D	lcl|SIZZ01000002.1_prot_TBR36652.1_2370;	K01698	hemB,	ALAD;	porphobilinogen	synthase	[EC:4.2.1.24]
D	lcl|SIZZ01000004.1_prot_TBR35928.1_3595;	K01749	hemC,	HMBS;	hydroxymethylbilane	synthase	[EC:2.5.1.61]
D	lcl|SIZZ01000002.1_prot_TBR36716.1_2445;	K01719	hemD,	UROS;	uroporphyrinogen-III	synthase	[EC:4.2.1.75]
D	lcl|SIZZ01000001.1_prot_TBR40211.1_1687;	K01599	hemE,	UROD;	uroporphyrinogen	decarboxylase	[EC:4.1.1.37]
D	lcl|SIZZ01000002.1_prot_TBR36551.1_2263;	K00228	CPOX,	hemF;	coproporphyrinogen	III	oxidase	[EC:1.3.3.3]
D	lcl|SIZZ01000001.1_prot_TBR40019.1_1471;	K02495	hemN,	hemZ;	oxygen-independent	coproporphyrinogen	III	oxidase	[EC:1.3.98.3]
D	lcl|SIZZ01000001.1_prot_TBR40091.1_1551;	K08973	hemJ;	protoporphyrinogen	IX	oxidase	[EC:1.3.99.-]
D	lcl|SIZZ01000003.1_prot_TBR36243.1_3306;	K01772	hemH,	FECH;	protoporphyrin/coproporphyrin	ferrochelatase	[EC:4.98.1.1	4.99.1.9]
D	lcl|SIZZ01000001.1_prot_TBR39242.1_614;	K02302	cysG;	uroporphyrin-III	C-methyltransferase	/	precorrin-2	dehydrogenase	/	sirohydrochlorin	ferrochelatase	[EC:2.1.1.107	1.3.1.76	4.99.1.4]
D	lcl|SIZZ01000002.1_prot_TBR36672.1_2393;	K02257	COX10,	ctaB,	cyoE;	heme	o	synthase	[EC:2.5.1.141]
D	lcl|SIZZ01000002.1_prot_TBR36671.1_2392;	K02259	COX15,	ctaA;	heme	a	synthase	[EC:1.17.99.9]
D	lcl|SIZZ01000002.1_prot_TBR37041.1_2800;	K02224	cobB-cbiA;	cobyrinic	acid	a,c-diamide	synthase	[EC:6.3.5.9	6.3.5.11]
D	lcl|SIZZ01000002.1_prot_TBR36998.1_2753;	K00798	MMAB,	pduO;	cob(I)alamin	adenosyltransferase	[EC:2.5.1.17]
D	lcl|SIZZ01000002.1_prot_TBR37329.1_2799;	K19221	cobA,	btuR;	cob(I)alamin	adenosyltransferase	[EC:2.5.1.17]
D	lcl|SIZZ01000002.1_prot_TBR37044.1_2803;	K02232	cobQ,	cbiP;	adenosylcobyric	acid	synthase	[EC:6.3.5.10]
D	lcl|SIZZ01000002.1_prot_TBR37042.1_2801;	K02227	cbiB,	cobD;	adenosylcobinamide-phosphate	synthase	[EC:6.3.1.10]
D	lcl|SIZZ01000002.1_prot_TBR37043.1_2802;	K02225	cobC1,	cobC;	cobalamin	biosynthesis	protein	CobC
D	lcl|SIZZ01000002.1_prot_TBR37045.1_2804;	K02231	cobP,	cobU;	adenosylcobinamide	kinase	/	adenosylcobinamide-phosphate	guanylyltransferase	[EC:2.7.1.156	2.7.7.62]
D	lcl|SIZZ01000002.1_prot_TBR37330.1_2807;	K02233	E2.7.8.26,	cobS,	cobV;	adenosylcobinamide-GDP	ribazoletransferase	[EC:2.7.8.26]
D	lcl|SIZZ01000002.1_prot_TBR37046.1_2805;	K00768	E2.4.2.21,	cobU,	cobT;	nicotinate-nucleotide--dimethylbenzimidazole	phosphoribosyltransferase	[EC:2.4.2.21]
D	lcl|SIZZ01000002.1_prot_TBR37047.1_2806;	K02226	cobC,	phpB;	alpha-ribazole	phosphatase	[EC:3.1.3.73]
D	lcl|SIZZ01000001.1_prot_TBR39460.1_865;	K04034	bchE;	anaerobic	magnesium-protoporphyrin	IX	monomethyl	ester	cyclase	[EC:1.21.98.3]
D	lcl|SIZZ01000001.1_prot_TBR39464.1_869;	K04034	bchE;	anaerobic	magnesium-protoporphyrin	IX	monomethyl	ester	cyclase	[EC:1.21.98.3]
D	lcl|SIZZ01000002.1_prot_TBR36527.1_2234;	K03594	bfr;	bacterioferritin	[EC:1.16.3.1]
C	130	Ubiquinone	and	other	terpenoid-quinone	biosynthesis	[PATH:ko00130]
D	lcl|SIZZ01000003.1_prot_TBR36104.1_3149;	K03179	ubiA;	4-hydroxybenzoate	polyprenyltransferase	[EC:2.5.1.39]
D	lcl|SIZZ01000002.1_prot_TBR37001.1_2756;	K18800	ubiI;	2-polyprenylphenol	6-hydroxylase	[EC:1.14.13.240]
D	lcl|SIZZ01000001.1_prot_TBR40726.1_1367;	K00568	ubiG;	2-polyprenyl-6-hydroxyphenyl	methylase	/	3-demethylubiquinone-9	3-methyltransferase	[EC:2.1.1.222	2.1.1.64]
D	lcl|SIZZ01000002.1_prot_TBR37000.1_2755;	K03185	ubiH;	2-octaprenyl-6-methoxyphenol	hydroxylase	[EC:1.14.13.-]
D	lcl|SIZZ01000001.1_prot_TBR40397.1_1893;	K03183	ubiE;	demethylmenaquinone	methyltransferase	/	2-methoxy-6-polyprenyl-1,4-benzoquinol	methylase	[EC:2.1.1.163	2.1.1.201]
D	lcl|SIZZ01000002.1_prot_TBR36587.1_2299;	K03183	ubiE;	demethylmenaquinone	methyltransferase	/	2-methoxy-6-polyprenyl-1,4-benzoquinol	methylase	[EC:2.1.1.163	2.1.1.201]
D	lcl|SIZZ01000001.1_prot_TBR39486.1_893;	K06134	COQ7;	3-demethoxyubiquinol	3-hydroxylase	[EC:1.14.99.60]
D	lcl|SIZZ01000002.1_prot_TBR36844.1_2587;	K06134	COQ7;	3-demethoxyubiquinol	3-hydroxylase	[EC:1.14.99.60]
D	lcl|SIZZ01000002.1_prot_TBR36711.1_2440;	K19222	menI,	DHNAT;	1,4-dihydroxy-2-naphthoyl-CoA	hydrolase	[EC:3.1.2.28]
D	lcl|SIZZ01000002.1_prot_TBR37254.1_3028;	K03809	wrbA;	NAD(P)H	dehydrogenase	(quinone)	[EC:1.6.5.2]
D	lcl|SIZZ01000001.1_prot_TBR40452.1_1953;	K00457	HPD,	hppD;	4-hydroxyphenylpyruvate	dioxygenase	[EC:1.13.11.27]
B
B	9109	Metabolism	of	terpenoids	and	polyketides
C	900	Terpenoid	backbone	biosynthesis	[PATH:ko00900]
D	lcl|SIZZ01000002.1_prot_TBR37083.1_2846;	K01662	dxs;	1-deoxy-D-xylulose-5-phosphate	synthase	[EC:2.2.1.7]
D	lcl|SIZZ01000001.1_prot_TBR40625.1_83;	K00099	dxr;	1-deoxy-D-xylulose-5-phosphate	reductoisomerase	[EC:1.1.1.267]
D	lcl|SIZZ01000001.1_prot_TBR39125.1_486;	K00991	ispD;	2-C-methyl-D-erythritol	4-phosphate	cytidylyltransferase	[EC:2.7.7.60]
D	lcl|SIZZ01000002.1_prot_TBR37264.1_3039;	K00919	ispE;	4-diphosphocytidyl-2-C-methyl-D-erythritol	kinase	[EC:2.7.1.148]
D	lcl|SIZZ01000001.1_prot_TBR40658.1_487;	K01770	ispF;	2-C-methyl-D-erythritol	2,4-cyclodiphosphate	synthase	[EC:4.6.1.12]
D	lcl|SIZZ01000001.1_prot_TBR39637.1_1060;	K03526	gcpE,	ispG;	(E)-4-hydroxy-3-methylbut-2-enyl-diphosphate	synthase	[EC:1.17.7.1	1.17.7.3]
D	lcl|SIZZ01000001.1_prot_TBR39040.1_396;	K03527	ispH,	lytB;	4-hydroxy-3-methylbut-2-en-1-yl	diphosphate	reductase	[EC:1.17.7.4]
D	lcl|SIZZ01000001.1_prot_TBR39812.1_1251;	K00626	ACAT,	atoB;	acetyl-CoA	C-acetyltransferase	[EC:2.3.1.9]
D	lcl|SIZZ01000003.1_prot_TBR36102.1_3147;	K00626	ACAT,	atoB;	acetyl-CoA	C-acetyltransferase	[EC:2.3.1.9]
D	lcl|SIZZ01000001.1_prot_TBR38743.1_68;	K13789	GGPS;	geranylgeranyl	diphosphate	synthase,	type	II	[EC:2.5.1.1	2.5.1.10	2.5.1.29]
D	lcl|SIZZ01000002.1_prot_TBR37003.1_2758;	K02523	ispB;	octaprenyl-diphosphate	synthase	[EC:2.5.1.90]
D	lcl|SIZZ01000001.1_prot_TBR38758.1_85;	K00806	uppS;	undecaprenyl	diphosphate	synthase	[EC:2.5.1.31]
C	902	Monoterpenoid	biosynthesis	[PATH:ko00902]
C	909	Sesquiterpenoid	and	triterpenoid	biosynthesis	[PATH:ko00909]
C	904	Diterpenoid	biosynthesis	[PATH:ko00904]
C	906	Carotenoid	biosynthesis	[PATH:ko00906]
C	905	Brassinosteroid	biosynthesis	[PATH:ko00905]
C	981	Insect	hormone	biosynthesis	[PATH:ko00981]
D	lcl|SIZZ01000004.1_prot_TBR35960.1_3631;	K00128	ALDH;	aldehyde	dehydrogenase	(NAD+)	[EC:1.2.1.3]
C	908	Zeatin	biosynthesis	[PATH:ko00908]
D	lcl|SIZZ01000001.1_prot_TBR38832.1_166;	K00791	miaA,	TRIT1;	tRNA	dimethylallyltransferase	[EC:2.5.1.75]
C	903	Limonene	and	pinene	degradation	[PATH:ko00903]
D	lcl|SIZZ01000004.1_prot_TBR35960.1_3631;	K00128	ALDH;	aldehyde	dehydrogenase	(NAD+)	[EC:1.2.1.3]
D	lcl|SIZZ01000001.1_prot_TBR39671.1_1095;	K01782	fadJ;	3-hydroxyacyl-CoA	dehydrogenase	/	enoyl-CoA	hydratase	/	3-hydroxybutyryl-CoA	epimerase	[EC:1.1.1.35	4.2.1.17	5.1.2.3]
C	281	Geraniol	degradation	[PATH:ko00281]
D	lcl|SIZZ01000003.1_prot_TBR36350.1_3424;	K13775	atuG;	citronellol/citronellal	dehydrogenase
D	lcl|SIZZ01000001.1_prot_TBR39823.1_1263;	K01640	HMGCL,	hmgL;	hydroxymethylglutaryl-CoA	lyase	[EC:4.1.3.4]
D	lcl|SIZZ01000001.1_prot_TBR39316.1_701;	K00632	fadA,	fadI;	acetyl-CoA	acyltransferase	[EC:2.3.1.16]
D	lcl|SIZZ01000001.1_prot_TBR39671.1_1095;	K01782	fadJ;	3-hydroxyacyl-CoA	dehydrogenase	/	enoyl-CoA	hydratase	/	3-hydroxybutyryl-CoA	epimerase	[EC:1.1.1.35	4.2.1.17	5.1.2.3]
C	1052	Type	I	polyketide	structures	[PATH:ko01052]
C	522	Biosynthesis	of	12-,	-14	and	16-membered	macrolides	[PATH:ko00522]
C	1051	Biosynthesis	of	ansamycins	[PATH:ko01051]
D	lcl|SIZZ01000001.1_prot_TBR40382.1_1874;	K00615	E2.2.1.1,	tktA,	tktB;	transketolase	[EC:2.2.1.1]
D	lcl|SIZZ01000002.1_prot_TBR36495.1_2202;	K00615	E2.2.1.1,	tktA,	tktB;	transketolase	[EC:2.2.1.1]
C	1059	Biosynthesis	of	enediyne	antibiotics	[PATH:ko01059]
C	1056	Biosynthesis	of	type	II	polyketide	backbone	[PATH:ko01056]
C	1057	Biosynthesis	of	type	II	polyketide	products	[PATH:ko01057]
C	253	Tetracycline	biosynthesis	[PATH:ko00253]
C	523	Polyketide	sugar	unit	biosynthesis	[PATH:ko00523]
D	lcl|SIZZ01000001.1_prot_TBR40368.1_1859;	K00973	rfbA,	rmlA,	rffH;	glucose-1-phosphate	thymidylyltransferase	[EC:2.7.7.24]
D	lcl|SIZZ01000001.1_prot_TBR39008.1_361;	K01710	rfbB,	rmlB,	rffG;	dTDP-glucose	4,6-dehydratase	[EC:4.2.1.46]
D	lcl|SIZZ01000001.1_prot_TBR40367.1_1858;	K01710	rfbB,	rmlB,	rffG;	dTDP-glucose	4,6-dehydratase	[EC:4.2.1.46]
D	lcl|SIZZ01000001.1_prot_TBR40369.1_1860;	K01790	rfbC,	rmlC;	dTDP-4-dehydrorhamnose	3,5-epimerase	[EC:5.1.3.13]
D	lcl|SIZZ01000001.1_prot_TBR40370.1_1861;	K00067	rfbD,	rmlD;	dTDP-4-dehydrorhamnose	reductase	[EC:1.1.1.133]
C	1054	Nonribosomal	peptide	structures	[PATH:ko01054]
D	lcl|SIZZ01000003.1_prot_TBR36183.1_3241;	K15654	srfAA,	lchAA;	surfactin	family	lipopeptide	synthetase	A
C	1053	Biosynthesis	of	siderophore	group	nonribosomal	peptides	[PATH:ko01053]
D	lcl|SIZZ01000001.1_prot_TBR39047.1_404;	K02362	entD;	enterobactin	synthetase	component	D	[EC:6.3.2.14	2.7.8.-]
C	1055	Biosynthesis	of	vancomycin	group	antibiotics	[PATH:ko01055]
D	lcl|SIZZ01000001.1_prot_TBR39008.1_361;	K01710	rfbB,	rmlB,	rffG;	dTDP-glucose	4,6-dehydratase	[EC:4.2.1.46]
D	lcl|SIZZ01000001.1_prot_TBR40367.1_1858;	K01710	rfbB,	rmlB,	rffG;	dTDP-glucose	4,6-dehydratase	[EC:4.2.1.46]
B
B	9110	Biosynthesis	of	other	secondary	metabolites
C	940	Phenylpropanoid	biosynthesis	[PATH:ko00940]
D	lcl|SIZZ01000003.1_prot_TBR36086.1_3131;	K03782	katG;	catalase-peroxidase	[EC:1.11.1.21]
C	945	Stilbenoid,	diarylheptanoid	and	gingerol	biosynthesis	[PATH:ko00945]
C	941	Flavonoid	biosynthesis	[PATH:ko00941]
C	944	Flavone	and	flavonol	biosynthesis	[PATH:ko00944]
C	942	Anthocyanin	biosynthesis	[PATH:ko00942]
C	943	Isoflavonoid	biosynthesis	[PATH:ko00943]
C	901	Indole	alkaloid	biosynthesis	[PATH:ko00901]
C	403	Indole	diterpene	alkaloid	biosynthesis	[PATH:ko00403]
C	950	Isoquinoline	alkaloid	biosynthesis	[PATH:ko00950]
D	lcl|SIZZ01000001.1_prot_TBR39879.1_1321;	K00812	aspB;	aspartate	aminotransferase	[EC:2.6.1.1]
D	lcl|SIZZ01000002.1_prot_TBR36581.1_2293;	K00832	tyrB;	aromatic-amino-acid	transaminase	[EC:2.6.1.57]
C	960	Tropane,	piperidine	and	pyridine	alkaloid	biosynthesis	[PATH:ko00960]
D	lcl|SIZZ01000003.1_prot_TBR36311.1_3382;	K08081	TR1;	tropinone	reductase	I	[EC:1.1.1.206]
D	lcl|SIZZ01000001.1_prot_TBR39879.1_1321;	K00812	aspB;	aspartate	aminotransferase	[EC:2.6.1.1]
D	lcl|SIZZ01000001.1_prot_TBR39103.1_464;	K00817	hisC;	histidinol-phosphate	aminotransferase	[EC:2.6.1.9]
D	lcl|SIZZ01000002.1_prot_TBR36581.1_2293;	K00832	tyrB;	aromatic-amino-acid	transaminase	[EC:2.6.1.57]
C	996	Biosynthesis	of	various	alkaloids	[PATH:ko00996]
C	232	Caffeine	metabolism	[PATH:ko00232]
C	965	Betalain	biosynthesis	[PATH:ko00965]
D	lcl|SIZZ01000001.1_prot_TBR39965.1_1412;	K15777	DOPA;	4,5-DOPA	dioxygenase	extradiol	[EC:1.13.11.-]
C	966	Glucosinolate	biosynthesis	[PATH:ko00966]
D	lcl|SIZZ01000003.1_prot_TBR36113.1_3159;	K01703	leuC,	IPMI-L;	3-isopropylmalate/(R)-2-methylmalate	dehydratase	large	subunit	[EC:4.2.1.33	4.2.1.35]
D	lcl|SIZZ01000002.1_prot_TBR36933.1_2685;	K00826	E2.6.1.42,	ilvE;	branched-chain	amino	acid	aminotransferase	[EC:2.6.1.42]
D	lcl|SIZZ01000003.1_prot_TBR36114.1_3160;	K00826	E2.6.1.42,	ilvE;	branched-chain	amino	acid	aminotransferase	[EC:2.6.1.42]
C	402	Benzoxazinoid	biosynthesis	[PATH:ko00402]
C	311	Penicillin	and	cephalosporin	biosynthesis	[PATH:ko00311]
D	lcl|SIZZ01000001.1_prot_TBR39049.1_406;	K17836	penP;	beta-lactamase	class	A	[EC:3.5.2.6]
C	332	Carbapenem	biosynthesis	[PATH:ko00332]
C	261	Monobactam	biosynthesis	[PATH:ko00261]
D	lcl|SIZZ01000001.1_prot_TBR40342.1_1831;	K00955	cysNC;	bifunctional	enzyme	CysN/CysC	[EC:2.7.7.4	2.7.1.25]
D	lcl|SIZZ01000001.1_prot_TBR40343.1_1832;	K00957	cysD;	sulfate	adenylyltransferase	subunit	2	[EC:2.7.7.4]
D	lcl|SIZZ01000001.1_prot_TBR39240.1_612;	K00958	sat,	met3;	sulfate	adenylyltransferase	[EC:2.7.7.4]
D	lcl|SIZZ01000002.1_prot_TBR37336.1_2863;	K00928	lysC;	aspartate	kinase	[EC:2.7.2.4]
D	lcl|SIZZ01000001.1_prot_TBR38881.1_223;	K00133	asd;	aspartate-semialdehyde	dehydrogenase	[EC:1.2.1.11]
D	lcl|SIZZ01000001.1_prot_TBR39005.1_358;	K01714	dapA;	4-hydroxy-tetrahydrodipicolinate	synthase	[EC:4.3.3.7]
D	lcl|SIZZ01000001.1_prot_TBR39290.1_673;	K00215	dapB;	4-hydroxy-tetrahydrodipicolinate	reductase	[EC:1.17.1.8]
D	lcl|SIZZ01000002.1_prot_TBR36804.1_2544;	K00215	dapB;	4-hydroxy-tetrahydrodipicolinate	reductase	[EC:1.17.1.8]
C	331	Clavulanic	acid	biosynthesis	[PATH:ko00331]
C	521	Streptomycin	biosynthesis	[PATH:ko00521]
D	lcl|SIZZ01000002.1_prot_TBR36645.1_2362;	K00845	glk;	glucokinase	[EC:2.7.1.2]
D	lcl|SIZZ01000003.1_prot_TBR36126.1_3176;	K00845	glk;	glucokinase	[EC:2.7.1.2]
D	lcl|SIZZ01000004.1_prot_TBR35784.1_3443;	K15778	pmm-pgm;	phosphomannomutase	/	phosphoglucomutase	[EC:5.4.2.8	5.4.2.2]
D	lcl|SIZZ01000002.1_prot_TBR37144.1_2912;	K01092	E3.1.3.25,	IMPA,	suhB;	myo-inositol-1(or	4)-monophosphatase	[EC:3.1.3.25]
D	lcl|SIZZ01000001.1_prot_TBR40368.1_1859;	K00973	rfbA,	rmlA,	rffH;	glucose-1-phosphate	thymidylyltransferase	[EC:2.7.7.24]
D	lcl|SIZZ01000001.1_prot_TBR39008.1_361;	K01710	rfbB,	rmlB,	rffG;	dTDP-glucose	4,6-dehydratase	[EC:4.2.1.46]
D	lcl|SIZZ01000001.1_prot_TBR40367.1_1858;	K01710	rfbB,	rmlB,	rffG;	dTDP-glucose	4,6-dehydratase	[EC:4.2.1.46]
D	lcl|SIZZ01000001.1_prot_TBR40369.1_1860;	K01790	rfbC,	rmlC;	dTDP-4-dehydrorhamnose	3,5-epimerase	[EC:5.1.3.13]
D	lcl|SIZZ01000001.1_prot_TBR40370.1_1861;	K00067	rfbD,	rmlD;	dTDP-4-dehydrorhamnose	reductase	[EC:1.1.1.133]
C	524	Neomycin,	kanamycin	and	gentamicin	biosynthesis	[PATH:ko00524]
D	lcl|SIZZ01000002.1_prot_TBR36645.1_2362;	K00845	glk;	glucokinase	[EC:2.7.1.2]
D	lcl|SIZZ01000003.1_prot_TBR36126.1_3176;	K00845	glk;	glucokinase	[EC:2.7.1.2]
C	525	Acarbose	and	validamycin	biosynthesis	[PATH:ko00525]
D	lcl|SIZZ01000001.1_prot_TBR40368.1_1859;	K00973	rfbA,	rmlA,	rffH;	glucose-1-phosphate	thymidylyltransferase	[EC:2.7.7.24]
D	lcl|SIZZ01000001.1_prot_TBR39008.1_361;	K01710	rfbB,	rmlB,	rffG;	dTDP-glucose	4,6-dehydratase	[EC:4.2.1.46]
D	lcl|SIZZ01000001.1_prot_TBR40367.1_1858;	K01710	rfbB,	rmlB,	rffG;	dTDP-glucose	4,6-dehydratase	[EC:4.2.1.46]
C	401	Novobiocin	biosynthesis	[PATH:ko00401]
D	lcl|SIZZ01000001.1_prot_TBR39879.1_1321;	K00812	aspB;	aspartate	aminotransferase	[EC:2.6.1.1]
D	lcl|SIZZ01000001.1_prot_TBR39103.1_464;	K00817	hisC;	histidinol-phosphate	aminotransferase	[EC:2.6.1.9]
D	lcl|SIZZ01000002.1_prot_TBR36581.1_2293;	K00832	tyrB;	aromatic-amino-acid	transaminase	[EC:2.6.1.57]
C	404	Staurosporine	biosynthesis	[PATH:ko00404]
C	405	Phenazine	biosynthesis	[PATH:ko00405]
D	lcl|SIZZ01000004.1_prot_TBR35931.1_3598;	K06998	phzF;	trans-2,3-dihydro-3-hydroxyanthranilate	isomerase	[EC:5.3.3.17]
D	lcl|SIZZ01000002.1_prot_TBR36819.1_2560;	K01657	trpE;	anthranilate	synthase	component	I	[EC:4.1.3.27]
D	lcl|SIZZ01000002.1_prot_TBR36835.1_2578;	K01658	trpG;	anthranilate	synthase	component	II	[EC:4.1.3.27]
C	333	Prodigiosin	biosynthesis	[PATH:ko00333]
D	lcl|SIZZ01000001.1_prot_TBR39189.1_559;	K00645	fabD,	MCAT,	MCT1;	[acyl-carrier-protein]	S-malonyltransferase	[EC:2.3.1.39]
D	lcl|SIZZ01000001.1_prot_TBR39190.1_560;	K00059	fabG,	OAR1;	3-oxoacyl-[acyl-carrier	protein]	reductase	[EC:1.1.1.100]
D	lcl|SIZZ01000001.1_prot_TBR39384.1_772;	K00059	fabG,	OAR1;	3-oxoacyl-[acyl-carrier	protein]	reductase	[EC:1.1.1.100]
D	lcl|SIZZ01000001.1_prot_TBR39489.1_896;	K00059	fabG,	OAR1;	3-oxoacyl-[acyl-carrier	protein]	reductase	[EC:1.1.1.100]
D	lcl|SIZZ01000001.1_prot_TBR39807.1_1246;	K00059	fabG,	OAR1;	3-oxoacyl-[acyl-carrier	protein]	reductase	[EC:1.1.1.100]
D	lcl|SIZZ01000001.1_prot_TBR39944.1_1390;	K00059	fabG,	OAR1;	3-oxoacyl-[acyl-carrier	protein]	reductase	[EC:1.1.1.100]
D	lcl|SIZZ01000001.1_prot_TBR39686.1_1112;	K00208	fabI;	enoyl-[acyl-carrier	protein]	reductase	I	[EC:1.3.1.9	1.3.1.10]
C	254	Aflatoxin	biosynthesis	[PATH:ko00254]
C	998	Biosynthesis	of	various	antibiotics	[PATH:ko00998]
D	lcl|SIZZ01000001.1_prot_TBR39191.1_561;	K02078	acpP;	acyl	carrier	protein
D	lcl|SIZZ01000001.1_prot_TBR40718.1_1230;	K02078	acpP;	acyl	carrier	protein
D	lcl|SIZZ01000001.1_prot_TBR39800.1_1238;	K02078	acpP;	acyl	carrier	protein
C	999	Biosynthesis	of	various	plant	secondary	metabolites	[PATH:ko00999]
D	lcl|SIZZ01000002.1_prot_TBR36947.1_2699;	K00789	metK,	MAT;	S-adenosylmethionine	synthetase	[EC:2.5.1.6]
D	lcl|SIZZ01000004.1_prot_TBR35899.1_3566;	K00014	aroE;	shikimate	dehydrogenase	[EC:1.1.1.25]
C	997	Biosynthesis	of	various	other	secondary	metabolites	[PATH:ko00997]
B
B	9111	Xenobiotics	biodegradation	and	metabolism
C	362	Benzoate	degradation	[PATH:ko00362]
D	lcl|SIZZ01000003.1_prot_TBR36050.1_3090;	K01055	pcaD;	3-oxoadipate	enol-lactonase	[EC:3.1.1.24]
D	lcl|SIZZ01000001.1_prot_TBR39316.1_701;	K00632	fadA,	fadI;	acetyl-CoA	acyltransferase	[EC:2.3.1.16]
D	lcl|SIZZ01000001.1_prot_TBR40534.1_2044;	K01607	pcaC;	4-carboxymuconolactone	decarboxylase	[EC:4.1.1.44]
D	lcl|SIZZ01000001.1_prot_TBR40578.1_2088;	K01607	pcaC;	4-carboxymuconolactone	decarboxylase	[EC:4.1.1.44]
D	lcl|SIZZ01000001.1_prot_TBR39671.1_1095;	K01782	fadJ;	3-hydroxyacyl-CoA	dehydrogenase	/	enoyl-CoA	hydratase	/	3-hydroxybutyryl-CoA	epimerase	[EC:1.1.1.35	4.2.1.17	5.1.2.3]
D	lcl|SIZZ01000001.1_prot_TBR39317.1_702;	K07516	fadN;	3-hydroxyacyl-CoA	dehydrogenase	[EC:1.1.1.35]
D	lcl|SIZZ01000001.1_prot_TBR39717.1_1145;	K00252	GCDH,	gcdH;	glutaryl-CoA	dehydrogenase	[EC:1.3.8.6]
D	lcl|SIZZ01000001.1_prot_TBR39812.1_1251;	K00626	ACAT,	atoB;	acetyl-CoA	C-acetyltransferase	[EC:2.3.1.9]
D	lcl|SIZZ01000003.1_prot_TBR36102.1_3147;	K00626	ACAT,	atoB;	acetyl-CoA	C-acetyltransferase	[EC:2.3.1.9]
C	627	Aminobenzoate	degradation	[PATH:ko00627]
D	lcl|SIZZ01000002.1_prot_TBR37257.1_3031;	K01512	acyP;	acylphosphatase	[EC:3.6.1.7]
C	364	Fluorobenzoate	degradation	[PATH:ko00364]
D	lcl|SIZZ01000001.1_prot_TBR38870.1_209;	K01061	E3.1.1.45;	carboxymethylenebutenolidase	[EC:3.1.1.45]
C	625	Chloroalkane	and	chloroalkene	degradation	[PATH:ko00625]
D	lcl|SIZZ01000001.1_prot_TBR39847.1_1287;	K01563	dhaA;	haloalkane	dehalogenase	[EC:3.8.1.5]
D	lcl|SIZZ01000001.1_prot_TBR39490.1_897;	K13953	adhP;	alcohol	dehydrogenase,	propanol-preferring	[EC:1.1.1.1]
D	lcl|SIZZ01000002.1_prot_TBR36688.1_2414;	K13953	adhP;	alcohol	dehydrogenase,	propanol-preferring	[EC:1.1.1.1]
D	lcl|SIZZ01000002.1_prot_TBR36631.1_2346;	K00121	frmA,	ADH5,	adhC;	S-(hydroxymethyl)glutathione	dehydrogenase	/	alcohol	dehydrogenase	[EC:1.1.1.284	1.1.1.1]
D	lcl|SIZZ01000004.1_prot_TBR35960.1_3631;	K00128	ALDH;	aldehyde	dehydrogenase	(NAD+)	[EC:1.2.1.3]
D	lcl|SIZZ01000001.1_prot_TBR38861.1_199;	K01560	E3.8.1.2;	2-haloacid	dehalogenase	[EC:3.8.1.2]
C	361	Chlorocyclohexane	and	chlorobenzene	degradation	[PATH:ko00361]
D	lcl|SIZZ01000001.1_prot_TBR39847.1_1287;	K01563	dhaA;	haloalkane	dehalogenase	[EC:3.8.1.5]
D	lcl|SIZZ01000001.1_prot_TBR38870.1_209;	K01061	E3.1.1.45;	carboxymethylenebutenolidase	[EC:3.1.1.45]
D	lcl|SIZZ01000001.1_prot_TBR38861.1_199;	K01560	E3.8.1.2;	2-haloacid	dehalogenase	[EC:3.8.1.2]
C	623	Toluene	degradation	[PATH:ko00623]
D	lcl|SIZZ01000001.1_prot_TBR38870.1_209;	K01061	E3.1.1.45;	carboxymethylenebutenolidase	[EC:3.1.1.45]
C	622	Xylene	degradation	[PATH:ko00622]
C	633	Nitrotoluene	degradation	[PATH:ko00633]
C	642	Ethylbenzene	degradation	[PATH:ko00642]
D	lcl|SIZZ01000001.1_prot_TBR39316.1_701;	K00632	fadA,	fadI;	acetyl-CoA	acyltransferase	[EC:2.3.1.16]
C	643	Styrene	degradation	[PATH:ko00643]
D	lcl|SIZZ01000001.1_prot_TBR40450.1_1951;	K00451	HGD,	hmgA;	homogentisate	1,2-dioxygenase	[EC:1.13.11.5]
D	lcl|SIZZ01000001.1_prot_TBR40449.1_1949;	K16171	faaH;	fumarylacetoacetate	(FAA)	hydrolase	[EC:3.7.1.2]
C	791	Atrazine	degradation	[PATH:ko00791]
C	930	Caprolactam	degradation	[PATH:ko00930]
D	lcl|SIZZ01000001.1_prot_TBR39671.1_1095;	K01782	fadJ;	3-hydroxyacyl-CoA	dehydrogenase	/	enoyl-CoA	hydratase	/	3-hydroxybutyryl-CoA	epimerase	[EC:1.1.1.35	4.2.1.17	5.1.2.3]
C	363	Bisphenol	degradation	[PATH:ko00363]
C	621	Dioxin	degradation	[PATH:ko00621]
C	626	Naphthalene	degradation	[PATH:ko00626]
D	lcl|SIZZ01000001.1_prot_TBR39490.1_897;	K13953	adhP;	alcohol	dehydrogenase,	propanol-preferring	[EC:1.1.1.1]
D	lcl|SIZZ01000002.1_prot_TBR36688.1_2414;	K13953	adhP;	alcohol	dehydrogenase,	propanol-preferring	[EC:1.1.1.1]
D	lcl|SIZZ01000002.1_prot_TBR36631.1_2346;	K00121	frmA,	ADH5,	adhC;	S-(hydroxymethyl)glutathione	dehydrogenase	/	alcohol	dehydrogenase	[EC:1.1.1.284	1.1.1.1]
C	624	Polycyclic	aromatic	hydrocarbon	degradation	[PATH:ko00624]
C	365	Furfural	degradation	[PATH:ko00365]
C	984	Steroid	degradation	[PATH:ko00984]
C	980	Metabolism	of	xenobiotics	by	cytochrome	P450	[PATH:ko00980]
D	lcl|SIZZ01000001.1_prot_TBR38980.1_331;	K00799	GST,	gst;	glutathione	S-transferase	[EC:2.5.1.18]
D	lcl|SIZZ01000001.1_prot_TBR39868.1_1308;	K00799	GST,	gst;	glutathione	S-transferase	[EC:2.5.1.18]
D	lcl|SIZZ01000001.1_prot_TBR39968.1_1415;	K00799	GST,	gst;	glutathione	S-transferase	[EC:2.5.1.18]
D	lcl|SIZZ01000001.1_prot_TBR40017.1_1469;	K00799	GST,	gst;	glutathione	S-transferase	[EC:2.5.1.18]
D	lcl|SIZZ01000001.1_prot_TBR40425.1_1924;	K00799	GST,	gst;	glutathione	S-transferase	[EC:2.5.1.18]
D	lcl|SIZZ01000002.1_prot_TBR36592.1_2304;	K00799	GST,	gst;	glutathione	S-transferase	[EC:2.5.1.18]
D	lcl|SIZZ01000002.1_prot_TBR36755.1_2489;	K00799	GST,	gst;	glutathione	S-transferase	[EC:2.5.1.18]
D	lcl|SIZZ01000004.1_prot_TBR35839.1_3502;	K00799	GST,	gst;	glutathione	S-transferase	[EC:2.5.1.18]
D	lcl|SIZZ01000001.1_prot_TBR40253.1_1733;	K00078	DHDH;	dihydrodiol	dehydrogenase	/	D-xylose	1-dehydrogenase	(NADP)	[EC:1.3.1.20	1.1.1.179]
D	lcl|SIZZ01000002.1_prot_TBR36631.1_2346;	K00121	frmA,	ADH5,	adhC;	S-(hydroxymethyl)glutathione	dehydrogenase	/	alcohol	dehydrogenase	[EC:1.1.1.284	1.1.1.1]
D	lcl|SIZZ01000001.1_prot_TBR39490.1_897;	K13953	adhP;	alcohol	dehydrogenase,	propanol-preferring	[EC:1.1.1.1]
D	lcl|SIZZ01000002.1_prot_TBR36688.1_2414;	K13953	adhP;	alcohol	dehydrogenase,	propanol-preferring	[EC:1.1.1.1]
C	982	Drug	metabolism	-	cytochrome	P450	[PATH:ko00982]
D	lcl|SIZZ01000001.1_prot_TBR38980.1_331;	K00799	GST,	gst;	glutathione	S-transferase	[EC:2.5.1.18]
D	lcl|SIZZ01000001.1_prot_TBR39868.1_1308;	K00799	GST,	gst;	glutathione	S-transferase	[EC:2.5.1.18]
D	lcl|SIZZ01000001.1_prot_TBR39968.1_1415;	K00799	GST,	gst;	glutathione	S-transferase	[EC:2.5.1.18]
D	lcl|SIZZ01000001.1_prot_TBR40017.1_1469;	K00799	GST,	gst;	glutathione	S-transferase	[EC:2.5.1.18]
D	lcl|SIZZ01000001.1_prot_TBR40425.1_1924;	K00799	GST,	gst;	glutathione	S-transferase	[EC:2.5.1.18]
D	lcl|SIZZ01000002.1_prot_TBR36592.1_2304;	K00799	GST,	gst;	glutathione	S-transferase	[EC:2.5.1.18]
D	lcl|SIZZ01000002.1_prot_TBR36755.1_2489;	K00799	GST,	gst;	glutathione	S-transferase	[EC:2.5.1.18]
D	lcl|SIZZ01000004.1_prot_TBR35839.1_3502;	K00799	GST,	gst;	glutathione	S-transferase	[EC:2.5.1.18]
D	lcl|SIZZ01000002.1_prot_TBR36631.1_2346;	K00121	frmA,	ADH5,	adhC;	S-(hydroxymethyl)glutathione	dehydrogenase	/	alcohol	dehydrogenase	[EC:1.1.1.284	1.1.1.1]
D	lcl|SIZZ01000001.1_prot_TBR39490.1_897;	K13953	adhP;	alcohol	dehydrogenase,	propanol-preferring	[EC:1.1.1.1]
D	lcl|SIZZ01000002.1_prot_TBR36688.1_2414;	K13953	adhP;	alcohol	dehydrogenase,	propanol-preferring	[EC:1.1.1.1]
C	983	Drug	metabolism	-	other	enzymes	[PATH:ko00983]
D	lcl|SIZZ01000001.1_prot_TBR39654.1_1077;	K00760	hprT,	hpt,	HPRT1;	hypoxanthine	phosphoribosyltransferase	[EC:2.4.2.8]
D	lcl|SIZZ01000001.1_prot_TBR39329.1_714;	K00088	IMPDH,	guaB;	IMP	dehydrogenase	[EC:1.1.1.205]
D	lcl|SIZZ01000001.1_prot_TBR39330.1_715;	K01951	guaA,	GMPS;	GMP	synthase	(glutamine-hydrolysing)	[EC:6.3.5.2]
D	lcl|SIZZ01000003.1_prot_TBR36018.1_3053;	K01951	guaA,	GMPS;	GMP	synthase	(glutamine-hydrolysing)	[EC:6.3.5.2]
D	lcl|SIZZ01000002.1_prot_TBR36866.1_2611;	K01519	rdgB,	ITPA;	XTP/dITP	diphosphohydrolase	[EC:3.6.1.66]
D	lcl|SIZZ01000002.1_prot_TBR37241.1_3014;	K01489	cdd,	CDA;	cytidine	deaminase	[EC:3.5.4.5]
D	lcl|SIZZ01000002.1_prot_TBR36596.1_2309;	K00857	tdk,	TK;	thymidine	kinase	[EC:2.7.1.21]
D	lcl|SIZZ01000001.1_prot_TBR39319.1_704;	K00940	ndk,	NME;	nucleoside-diphosphate	kinase	[EC:2.7.4.6]
D	lcl|SIZZ01000004.1_prot_TBR35987.1_3444;	K01520	dut,	DUT;	dUTP	pyrophosphatase	[EC:3.6.1.23]
D	lcl|SIZZ01000003.1_prot_TBR36086.1_3131;	K03782	katG;	catalase-peroxidase	[EC:1.11.1.21]
D	lcl|SIZZ01000001.1_prot_TBR38980.1_331;	K00799	GST,	gst;	glutathione	S-transferase	[EC:2.5.1.18]
D	lcl|SIZZ01000001.1_prot_TBR39868.1_1308;	K00799	GST,	gst;	glutathione	S-transferase	[EC:2.5.1.18]
D	lcl|SIZZ01000001.1_prot_TBR39968.1_1415;	K00799	GST,	gst;	glutathione	S-transferase	[EC:2.5.1.18]
D	lcl|SIZZ01000001.1_prot_TBR40017.1_1469;	K00799	GST,	gst;	glutathione	S-transferase	[EC:2.5.1.18]
D	lcl|SIZZ01000001.1_prot_TBR40425.1_1924;	K00799	GST,	gst;	glutathione	S-transferase	[EC:2.5.1.18]
D	lcl|SIZZ01000002.1_prot_TBR36592.1_2304;	K00799	GST,	gst;	glutathione	S-transferase	[EC:2.5.1.18]
D	lcl|SIZZ01000002.1_prot_TBR36755.1_2489;	K00799	GST,	gst;	glutathione	S-transferase	[EC:2.5.1.18]
D	lcl|SIZZ01000004.1_prot_TBR35839.1_3502;	K00799	GST,	gst;	glutathione	S-transferase	[EC:2.5.1.18]
B
B	9112	Not	included	in	regular	maps
C	9113	Global	maps	only
D	lcl|SIZZ01000003.1_prot_TBR36291.1_3361;	K01451	hipO;	hippurate	hydrolase	[EC:3.5.1.32]

## Sheet: Level 1- Genetic Info Processin
Level 1 KEGG Annotations for Genetic Information Processing
A09120	Genetic	Information	Processing
B
B	9121	Transcription
C	3020	RNA	polymerase	[PATH:ko03020]
D	lcl|SIZZ01000005.1_prot_TBR35758.1_3667;	K03043	rpoB;	DNA-directed	RNA	polymerase	subunit	beta	[EC:2.7.7.6]
D	lcl|SIZZ01000005.1_prot_TBR35757.1_3666;	K03046	rpoC;	DNA-directed	RNA	polymerase	subunit	beta'	[EC:2.7.7.6]
D	lcl|SIZZ01000001.1_prot_TBR38702.1_27;	K03040	rpoA;	DNA-directed	RNA	polymerase	subunit	alpha	[EC:2.7.7.6]
D	lcl|SIZZ01000002.1_prot_TBR36876.1_2621;	K03060	rpoZ;	DNA-directed	RNA	polymerase	subunit	omega	[EC:2.7.7.6]
C	3022	Basal	transcription	factors	[PATH:ko03022]
C	3040	Spliceosome	[PATH:ko03040]
D	lcl|SIZZ01000001.1_prot_TBR39882.1_1324;	K12733	PPIL1;	peptidyl-prolyl	cis-trans	isomerase-like	1	[EC:5.2.1.8]
B
B	9122	Translation
C	3010	Ribosome	[PATH:ko03010]
D	lcl|SIZZ01000001.1_prot_TBR39303.1_687;	K02945	RP-S1,	rpsA;	small	subunit	ribosomal	protein	S1
D	lcl|SIZZ01000001.1_prot_TBR38763.1_90;	K02967	RP-S2,	MRPS2,	rpsB;	small	subunit	ribosomal	protein	S2
D	lcl|SIZZ01000001.1_prot_TBR38684.1_9;	K02982	RP-S3,	rpsC;	small	subunit	ribosomal	protein	S3
D	lcl|SIZZ01000001.1_prot_TBR38701.1_26;	K02986	RP-S4,	rpsD;	small	subunit	ribosomal	protein	S4
D	lcl|SIZZ01000001.1_prot_TBR38695.1_20;	K02988	RP-S5,	MRPS5,	rpsE;	small	subunit	ribosomal	protein	S5
D	lcl|SIZZ01000001.1_prot_TBR39939.1_1385;	K02990	RP-S6,	MRPS6,	rpsF;	small	subunit	ribosomal	protein	S6
D	lcl|SIZZ01000005.1_prot_TBR35755.1_3664;	K02992	RP-S7,	MRPS7,	rpsG;	small	subunit	ribosomal	protein	S7
D	lcl|SIZZ01000001.1_prot_TBR38692.1_17;	K02994	RP-S8,	rpsH;	small	subunit	ribosomal	protein	S8
D	lcl|SIZZ01000002.1_prot_TBR36847.1_2590;	K02996	RP-S9,	MRPS9,	rpsI;	small	subunit	ribosomal	protein	S9
D	lcl|SIZZ01000001.1_prot_TBR38677.1_2;	K02946	RP-S10,	MRPS10,	rpsJ;	small	subunit	ribosomal	protein	S10
D	lcl|SIZZ01000001.1_prot_TBR38700.1_25;	K02948	RP-S11,	MRPS11,	rpsK;	small	subunit	ribosomal	protein	S11
D	lcl|SIZZ01000005.1_prot_TBR35756.1_3665;	K02950	RP-S12,	MRPS12,	rpsL;	small	subunit	ribosomal	protein	S12
D	lcl|SIZZ01000001.1_prot_TBR38699.1_24;	K02952	RP-S13,	rpsM;	small	subunit	ribosomal	protein	S13
D	lcl|SIZZ01000001.1_prot_TBR38691.1_16;	K02954	RP-S14,	MRPS14,	rpsN;	small	subunit	ribosomal	protein	S14
D	lcl|SIZZ01000001.1_prot_TBR39218.1_590;	K02956	RP-S15,	MRPS15,	rpsO;	small	subunit	ribosomal	protein	S15
D	lcl|SIZZ01000001.1_prot_TBR39930.1_1376;	K02959	RP-S16,	MRPS16,	rpsP;	small	subunit	ribosomal	protein	S16
D	lcl|SIZZ01000001.1_prot_TBR38687.1_12;	K02961	RP-S17,	MRPS17,	rpsQ;	small	subunit	ribosomal	protein	S17
D	lcl|SIZZ01000001.1_prot_TBR39938.1_1384;	K02963	RP-S18,	MRPS18,	rpsR;	small	subunit	ribosomal	protein	S18
D	lcl|SIZZ01000001.1_prot_TBR38682.1_7;	K02965	RP-S19,	rpsS;	small	subunit	ribosomal	protein	S19
D	lcl|SIZZ01000001.1_prot_TBR39035.1_391;	K02968	RP-S20,	rpsT;	small	subunit	ribosomal	protein	S20
D	lcl|SIZZ01000002.1_prot_TBR36679.1_2401;	K02970	RP-S21,	MRPS21,	rpsU;	small	subunit	ribosomal	protein	S21
D	lcl|SIZZ01000005.1_prot_TBR35761.1_3670;	K02863	RP-L1,	MRPL1,	rplA;	large	subunit	ribosomal	protein	L1
D	lcl|SIZZ01000001.1_prot_TBR38681.1_6;	K02886	RP-L2,	MRPL2,	rplB;	large	subunit	ribosomal	protein	L2
D	lcl|SIZZ01000001.1_prot_TBR38678.1_3;	K02906	RP-L3,	MRPL3,	rplC;	large	subunit	ribosomal	protein	L3
D	lcl|SIZZ01000001.1_prot_TBR38679.1_4;	K02926	RP-L4,	MRPL4,	rplD;	large	subunit	ribosomal	protein	L4
D	lcl|SIZZ01000001.1_prot_TBR38690.1_15;	K02931	RP-L5,	MRPL5,	rplE;	large	subunit	ribosomal	protein	L5
D	lcl|SIZZ01000001.1_prot_TBR38693.1_18;	K02933	RP-L6,	MRPL6,	rplF;	large	subunit	ribosomal	protein	L6
D	lcl|SIZZ01000005.1_prot_TBR35759.1_3668;	K02935	RP-L7,	MRPL12,	rplL;	large	subunit	ribosomal	protein	L7/L12
D	lcl|SIZZ01000001.1_prot_TBR39937.1_1383;	K02939	RP-L9,	MRPL9,	rplI;	large	subunit	ribosomal	protein	L9
D	lcl|SIZZ01000005.1_prot_TBR35760.1_3669;	K02864	RP-L10,	MRPL10,	rplJ;	large	subunit	ribosomal	protein	L10
D	lcl|SIZZ01000005.1_prot_TBR35762.1_3671;	K02867	RP-L11,	MRPL11,	rplK;	large	subunit	ribosomal	protein	L11
D	lcl|SIZZ01000002.1_prot_TBR36846.1_2589;	K02871	RP-L13,	MRPL13,	rplM;	large	subunit	ribosomal	protein	L13
D	lcl|SIZZ01000001.1_prot_TBR38688.1_13;	K02874	RP-L14,	MRPL14,	rplN;	large	subunit	ribosomal	protein	L14
D	lcl|SIZZ01000001.1_prot_TBR38697.1_22;	K02876	RP-L15,	MRPL15,	rplO;	large	subunit	ribosomal	protein	L15
D	lcl|SIZZ01000001.1_prot_TBR38685.1_10;	K02878	RP-L16,	MRPL16,	rplP;	large	subunit	ribosomal	protein	L16
D	lcl|SIZZ01000001.1_prot_TBR38703.1_28;	K02879	RP-L17,	MRPL17,	rplQ;	large	subunit	ribosomal	protein	L17
D	lcl|SIZZ01000001.1_prot_TBR38694.1_19;	K02881	RP-L18,	MRPL18,	rplR;	large	subunit	ribosomal	protein	L18
D	lcl|SIZZ01000001.1_prot_TBR39927.1_1373;	K02884	RP-L19,	MRPL19,	rplS;	large	subunit	ribosomal	protein	L19
D	lcl|SIZZ01000001.1_prot_TBR40086.1_1546;	K02887	RP-L20,	MRPL20,	rplT;	large	subunit	ribosomal	protein	L20
D	lcl|SIZZ01000001.1_prot_TBR39030.1_385;	K02888	RP-L21,	MRPL21,	rplU;	large	subunit	ribosomal	protein	L21
D	lcl|SIZZ01000001.1_prot_TBR38683.1_8;	K02890	RP-L22,	MRPL22,	rplV;	large	subunit	ribosomal	protein	L22
D	lcl|SIZZ01000001.1_prot_TBR38680.1_5;	K02892	RP-L23,	MRPL23,	rplW;	large	subunit	ribosomal	protein	L23
D	lcl|SIZZ01000001.1_prot_TBR38689.1_14;	K02895	RP-L24,	MRPL24,	rplX;	large	subunit	ribosomal	protein	L24
D	lcl|SIZZ01000002.1_prot_TBR37265.1_3041;	K02897	RP-L25,	rplY;	large	subunit	ribosomal	protein	L25
D	lcl|SIZZ01000001.1_prot_TBR39031.1_386;	K02899	RP-L27,	MRPL27,	rpmA;	large	subunit	ribosomal	protein	L27
D	lcl|SIZZ01000002.1_prot_TBR36610.1_2324;	K02902	RP-L28,	MRPL28,	rpmB;	large	subunit	ribosomal	protein	L28
D	lcl|SIZZ01000001.1_prot_TBR38686.1_11;	K02904	RP-L29,	rpmC;	large	subunit	ribosomal	protein	L29
D	lcl|SIZZ01000002.1_prot_TBR36881.1_2626;	K02909	RP-L31,	rpmE;	large	subunit	ribosomal	protein	L31
D	lcl|SIZZ01000001.1_prot_TBR39187.1_557;	K02911	RP-L32,	MRPL32,	rpmF;	large	subunit	ribosomal	protein	L32
D	lcl|SIZZ01000002.1_prot_TBR36609.1_2323;	K02913	RP-L33,	MRPL33,	rpmG;	large	subunit	ribosomal	protein	L33
D	lcl|SIZZ01000004.1_prot_TBR35873.1_3540;	K02914	RP-L34,	MRPL34,	rpmH;	large	subunit	ribosomal	protein	L34
D	lcl|SIZZ01000001.1_prot_TBR40087.1_1547;	K02916	RP-L35,	MRPL35,	rpmI;	large	subunit	ribosomal	protein	L35
D	lcl|SIZZ01000001.1_prot_TBR39297.1_681;	K02919	RP-L36,	MRPL36,	rpmJ;	large	subunit	ribosomal	protein	L36
C	970	Aminoacyl-tRNA	biosynthesis	[PATH:ko00970]
D	lcl|SIZZ01000001.1_prot_TBR38895.1_237;	K01885	EARS,	gltX;	glutamyl-tRNA	synthetase	[EC:6.1.1.17]
D	lcl|SIZZ01000001.1_prot_TBR38706.1_31;	K02433	gatA,	QRSL1;	aspartyl-tRNA(Asn)/glutamyl-tRNA(Gln)	amidotransferase	subunit	A	[EC:6.3.5.6	6.3.5.7]
D	lcl|SIZZ01000001.1_prot_TBR40350.1_1839;	K02433	gatA,	QRSL1;	aspartyl-tRNA(Asn)/glutamyl-tRNA(Gln)	amidotransferase	subunit	A	[EC:6.3.5.6	6.3.5.7]
D	lcl|SIZZ01000002.1_prot_TBR37074.1_2837;	K01886	QARS,	glnS;	glutaminyl-tRNA	synthetase	[EC:6.1.1.18]
D	lcl|SIZZ01000001.1_prot_TBR38985.1_336;	K01872	AARS,	alaS;	alanyl-tRNA	synthetase	[EC:6.1.1.7]
D	lcl|SIZZ01000002.1_prot_TBR37051.1_2811;	K01876	DARS2,	aspS;	aspartyl-tRNA	synthetase	[EC:6.1.1.12]
D	lcl|SIZZ01000001.1_prot_TBR39941.1_1387;	K01893	NARS,	asnS;	asparaginyl-tRNA	synthetase	[EC:6.1.1.22]
D	lcl|SIZZ01000003.1_prot_TBR36020.1_3055;	K01878	glyQ;	glycyl-tRNA	synthetase	alpha	chain	[EC:6.1.1.14]
D	lcl|SIZZ01000003.1_prot_TBR36021.1_3056;	K01879	glyS;	glycyl-tRNA	synthetase	beta	chain	[EC:6.1.1.14]
D	lcl|SIZZ01000001.1_prot_TBR40089.1_1549;	K01868	TARS,	thrS;	threonyl-tRNA	synthetase	[EC:6.1.1.3]
D	lcl|SIZZ01000001.1_prot_TBR39622.1_1045;	K01875	SARS,	serS;	seryl-tRNA	synthetase	[EC:6.1.1.11]
D	lcl|SIZZ01000001.1_prot_TBR39915.1_1358;	K01883	CARS,	cysS;	cysteinyl-tRNA	synthetase	[EC:6.1.1.16]
D	lcl|SIZZ01000001.1_prot_TBR38858.1_196;	K01874	MARS,	metG;	methionyl-tRNA	synthetase	[EC:6.1.1.10]
D	lcl|SIZZ01000002.1_prot_TBR36511.1_2218;	K00604	MTFMT,	fmt;	methionyl-tRNA	formyltransferase	[EC:2.1.2.9]
D	lcl|SIZZ01000001.1_prot_TBR40214.1_1690;	K01873	VARS,	valS;	valyl-tRNA	synthetase	[EC:6.1.1.9]
D	lcl|SIZZ01000001.1_prot_TBR39985.1_1433;	K01869	LARS,	leuS;	leucyl-tRNA	synthetase	[EC:6.1.1.4]
D	lcl|SIZZ01000001.1_prot_TBR39038.1_394;	K01870	IARS,	ileS;	isoleucyl-tRNA	synthetase	[EC:6.1.1.5]
D	lcl|SIZZ01000001.1_prot_TBR39535.1_947;	K04567	KARS,	lysS;	lysyl-tRNA	synthetase,	class	II	[EC:6.1.1.6]
D	lcl|SIZZ01000004.1_prot_TBR35787.1_3447;	K01887	RARS,	argS;	arginyl-tRNA	synthetase	[EC:6.1.1.19]
D	lcl|SIZZ01000001.1_prot_TBR40220.1_1696;	K01881	PARS,	proS;	prolyl-tRNA	synthetase	[EC:6.1.1.15]
D	lcl|SIZZ01000001.1_prot_TBR39097.1_458;	K01892	HARS,	hisS;	histidyl-tRNA	synthetase	[EC:6.1.1.21]
D	lcl|SIZZ01000001.1_prot_TBR40085.1_1545;	K01889	FARSA,	pheS;	phenylalanyl-tRNA	synthetase	alpha	chain	[EC:6.1.1.20]
D	lcl|SIZZ01000001.1_prot_TBR40084.1_1544;	K01890	FARSB,	pheT;	phenylalanyl-tRNA	synthetase	beta	chain	[EC:6.1.1.20]
D	lcl|SIZZ01000004.1_prot_TBR35776.1_3434;	K01866	YARS,	tyrS;	tyrosyl-tRNA	synthetase	[EC:6.1.1.1]
D	lcl|SIZZ01000001.1_prot_TBR40464.1_1965;	K01867	WARS,	trpS;	tryptophanyl-tRNA	synthetase	[EC:6.1.1.2]
C	3013	Nucleocytoplasmic	transport	[PATH:ko03013]
C	3015	mRNA	surveillance	pathway	[PATH:ko03015]
C	3008	Ribosome	biogenesis	in	eukaryotes	[PATH:ko03008]
D	lcl|SIZZ01000001.1_prot_TBR39662.1_1086;	K03685	rnc,	DROSHA,	RNT1;	ribonuclease	III	[EC:3.1.26.3]
D	lcl|SIZZ01000001.1_prot_TBR39604.1_1024;	K13288	orn,	REX2,	REXO2;	oligoribonuclease	[EC:3.1.-.-]
B
B	9123	Folding,	sorting	and	degradation
C	3060	Protein	export	[PATH:ko03060]
D	lcl|SIZZ01000001.1_prot_TBR38698.1_23;	K03076	secY;	preprotein	translocase	subunit	SecY
D	lcl|SIZZ01000001.1_prot_TBR39598.1_1018;	K03075	secG;	preprotein	translocase	subunit	SecG
D	lcl|SIZZ01000001.1_prot_TBR40059.1_1516;	K03072	secD;	preprotein	translocase	subunit	SecD
D	lcl|SIZZ01000001.1_prot_TBR40058.1_1515;	K03074	secF;	preprotein	translocase	subunit	SecF
D	lcl|SIZZ01000001.1_prot_TBR40738.1_1517;	K03210	yajC;	preprotein	translocase	subunit	YajC
D	lcl|SIZZ01000004.1_prot_TBR35875.1_3542;	K03217	yidC,	spoIIIJ,	OXA1,	ccfA;	YidC/Oxa1	family	membrane	protein	insertase
D	lcl|SIZZ01000002.1_prot_TBR36989.1_2744;	K03070	secA;	preprotein	translocase	subunit	SecA	[EC:7.4.2.8]
D	lcl|SIZZ01000002.1_prot_TBR36611.1_2325;	K03071	secB;	preprotein	translocase	subunit	SecB
D	lcl|SIZZ01000001.1_prot_TBR39931.1_1377;	K03106	SRP54,	ffh;	signal	recognition	particle	subunit	SRP54	[EC:3.6.5.4]
D	lcl|SIZZ01000002.1_prot_TBR37162.1_2930;	K03110	ftsY;	fused	signal	recognition	particle	receptor
D	lcl|SIZZ01000003.1_prot_TBR36247.1_3310;	K03118	tatC;	sec-independent	protein	translocase	protein	TatC
D	lcl|SIZZ01000001.1_prot_TBR39664.1_1088;	K03100	lepB;	signal	peptidase	I	[EC:3.4.21.89]
D	lcl|SIZZ01000001.1_prot_TBR39680.1_1104;	K03100	lepB;	signal	peptidase	I	[EC:3.4.21.89]
D	lcl|SIZZ01000001.1_prot_TBR39039.1_395;	K03101	lspA;	signal	peptidase	II	[EC:3.4.23.36]
C	4141	Protein	processing	in	endoplasmic	reticulum	[PATH:ko04141]
D	lcl|SIZZ01000001.1_prot_TBR38976.1_326;	K04079	HSP90A,	htpG;	molecular	chaperone	HtpG
D	lcl|SIZZ01000001.1_prot_TBR39227.1_599;	K13993	HSP20;	HSP20	family	protein
C	4130	SNARE	interactions	in	vesicular	transport	[PATH:ko04130]
C	4120	Ubiquitin	mediated	proteolysis	[PATH:ko04120]
C	4122	Sulfur	relay	system	[PATH:ko04122]
D	lcl|SIZZ01000001.1_prot_TBR39025.1_379;	K01011	TST,	MPST,	sseA;	thiosulfate/3-mercaptopyruvate	sulfurtransferase	[EC:2.8.1.1	2.8.1.2]
D	lcl|SIZZ01000001.1_prot_TBR39573.1_987;	K00566	mnmA,	trmU;	tRNA-uridine	2-sulfurtransferase	[EC:2.8.1.13]
D	lcl|SIZZ01000001.1_prot_TBR39326.1_711;	K21029	moeB;	molybdopterin-synthase	adenylyltransferase	[EC:2.7.7.80]
D	lcl|SIZZ01000002.1_prot_TBR36926.1_2677;	K03154	thiS;	sulfur	carrier	protein
C	3050	Proteasome	[PATH:ko03050]
C	3018	RNA	degradation	[PATH:ko03018]
D	lcl|SIZZ01000002.1_prot_TBR36529.1_2236;	K08311	nudH;	putative	(di)nucleoside	polyphosphate	hydrolase	[EC:3.6.1.-]
D	lcl|SIZZ01000001.1_prot_TBR39557.1_971;	K08300	rne;	ribonuclease	E	[EC:3.1.26.12]
D	lcl|SIZZ01000003.1_prot_TBR36266.1_3331;	K03732	rhlB;	ATP-dependent	RNA	helicase	RhlB	[EC:3.6.4.13]
D	lcl|SIZZ01000001.1_prot_TBR39123.1_484;	K01689	ENO,	eno;	enolase	[EC:4.2.1.11]
D	lcl|SIZZ01000001.1_prot_TBR39219.1_591;	K00962	pnp,	PNPT1;	polyribonucleotide	nucleotidyltransferase	[EC:2.7.7.8]
D	lcl|SIZZ01000001.1_prot_TBR39959.1_1406;	K11927	rhlE;	ATP-dependent	RNA	helicase	RhlE	[EC:3.6.4.13]
D	lcl|SIZZ01000001.1_prot_TBR40635.1_179;	K12573	rnr,	vacB;	ribonuclease	R	[EC:3.1.13.1]
D	lcl|SIZZ01000001.1_prot_TBR39964.1_1411;	K05592	deaD,	cshA;	ATP-dependent	RNA	helicase	DeaD	[EC:3.6.4.13]
D	lcl|SIZZ01000002.1_prot_TBR37151.1_2919;	K03654	recQ;	ATP-dependent	DNA	helicase	RecQ	[EC:5.6.2.4]
D	lcl|SIZZ01000003.1_prot_TBR36264.1_3329;	K03628	rho;	transcription	termination	factor	Rho
D	lcl|SIZZ01000001.1_prot_TBR39287.1_670;	K04043	dnaK,	HSPA9;	molecular	chaperone	DnaK
D	lcl|SIZZ01000002.1_prot_TBR36772.1_2508;	K04077	groEL,	HSPD1;	chaperonin	GroEL
D	lcl|SIZZ01000001.1_prot_TBR38833.1_167;	K03666	hfq;	host	factor-I	protein
D	lcl|SIZZ01000001.1_prot_TBR38992.1_344;	K00937	ppk1;	polyphosphate	kinase	[EC:2.7.4.1]
D	lcl|SIZZ01000001.1_prot_TBR39711.1_1139;	K00937	ppk1;	polyphosphate	kinase	[EC:2.7.4.1]
D	lcl|SIZZ01000002.1_prot_TBR37259.1_3033;	K22468	ppk2;	polyphosphate	kinase	[EC:2.7.4.34]
D	lcl|SIZZ01000001.1_prot_TBR39010.1_363;	K00970	pcnB;	poly(A)	polymerase	[EC:2.7.7.19]
B
B	9124	Replication	and	repair
C	3030	DNA	replication	[PATH:ko03030]
D	lcl|SIZZ01000001.1_prot_TBR39683.1_1107;	K02342	dnaQ;	DNA	polymerase	III	subunit	epsilon	[EC:2.7.7.7]
D	lcl|SIZZ01000001.1_prot_TBR38747.1_73;	K02337	dnaE;	DNA	polymerase	III	subunit	alpha	[EC:2.7.7.7]
D	lcl|SIZZ01000001.1_prot_TBR39174.1_543;	K02343	dnaX;	DNA	polymerase	III	subunit	gamma/tau	[EC:2.7.7.7]
D	lcl|SIZZ01000001.1_prot_TBR39197.1_567;	K02341	holB;	DNA	polymerase	III	subunit	delta'	[EC:2.7.7.7]
D	lcl|SIZZ01000001.1_prot_TBR39983.1_1431;	K02340	holA;	DNA	polymerase	III	subunit	delta	[EC:2.7.7.7]
D	lcl|SIZZ01000001.1_prot_TBR40291.1_1777;	K02339	holC;	DNA	polymerase	III	subunit	chi	[EC:2.7.7.7]
D	lcl|SIZZ01000004.1_prot_TBR35871.1_3538;	K02338	dnaN;	DNA	polymerase	III	subunit	beta	[EC:2.7.7.7]
D	lcl|SIZZ01000001.1_prot_TBR39936.1_1382;	K02314	dnaB;	replicative	DNA	helicase	[EC:5.6.2.3]
D	lcl|SIZZ01000002.1_prot_TBR36676.1_2397;	K02316	dnaG;	DNA	primase	[EC:2.7.7.101]
D	lcl|SIZZ01000002.1_prot_TBR37006.1_2761;	K03111	ssb;	single-strand	DNA-binding	protein
D	lcl|SIZZ01000001.1_prot_TBR40707.1_1108;	K03469	rnhA,	RNASEH1;	ribonuclease	HI	[EC:3.1.26.4]
D	lcl|SIZZ01000001.1_prot_TBR38750.1_76;	K03470	rnhB;	ribonuclease	HII	[EC:3.1.26.4]
D	lcl|SIZZ01000002.1_prot_TBR36753.1_2486;	K02335	polA;	DNA	polymerase	I	[EC:2.7.7.7]
D	lcl|SIZZ01000001.1_prot_TBR39609.1_1031;	K01972	E6.5.1.2,	ligA,	ligB;	DNA	ligase	(NAD+)	[EC:6.5.1.2]
C	3410	Base	excision	repair	[PATH:ko03410]
D	lcl|SIZZ01000002.1_prot_TBR36598.1_2311;	K10563	mutM,	fpg;	formamidopyrimidine-DNA	glycosylase	[EC:3.2.2.23	4.2.99.18]
D	lcl|SIZZ01000001.1_prot_TBR38856.1_194;	K10773	NTH;	endonuclease	III	[EC:4.2.99.18]
D	lcl|SIZZ01000001.1_prot_TBR38919.1_261;	K13529	ada-alkA;	AraC	family	transcriptional	regulator,	regulatory	protein	of	adaptative	response	/	DNA-3-methyladenine	glycosylase	II	[EC:3.2.2.21]
D	lcl|SIZZ01000003.1_prot_TBR36034.1_3071;	K01246	tag;	DNA-3-methyladenine	glycosylase	I	[EC:3.2.2.20]
D	lcl|SIZZ01000001.1_prot_TBR38709.1_34;	K03649	mug;	double-stranded	uracil-DNA	glycosylase	[EC:3.2.2.28]
D	lcl|SIZZ01000003.1_prot_TBR36269.1_3335;	K03648	UNG,	UDG;	uracil-DNA	glycosylase	[EC:3.2.2.27]
D	lcl|SIZZ01000002.1_prot_TBR37160.1_2928;	K03575	mutY;	A/G-specific	adenine	glycosylase	[EC:3.2.2.31]
D	lcl|SIZZ01000004.1_prot_TBR35780.1_3439;	K01142	E3.1.11.2,	xthA;	exodeoxyribonuclease	III	[EC:3.1.11.2]
D	lcl|SIZZ01000004.1_prot_TBR35903.1_3570;	K01142	E3.1.11.2,	xthA;	exodeoxyribonuclease	III	[EC:3.1.11.2]
D	lcl|SIZZ01000002.1_prot_TBR36753.1_2486;	K02335	polA;	DNA	polymerase	I	[EC:2.7.7.7]
D	lcl|SIZZ01000001.1_prot_TBR39544.1_957;	K07462	recJ;	single-stranded-DNA-specific	exonuclease	[EC:3.1.-.-]
D	lcl|SIZZ01000001.1_prot_TBR39609.1_1031;	K01972	E6.5.1.2,	ligA,	ligB;	DNA	ligase	(NAD+)	[EC:6.5.1.2]
C	3420	Nucleotide	excision	repair	[PATH:ko03420]
D	lcl|SIZZ01000001.1_prot_TBR38820.1_153;	K03723	mfd;	transcription-repair	coupling	factor	(superfamily	II	helicase)	[EC:3.6.4.-]
D	lcl|SIZZ01000001.1_prot_TBR39029.1_383;	K03701	uvrA;	excinuclease	ABC	subunit	A
D	lcl|SIZZ01000001.1_prot_TBR40095.1_1557;	K03702	uvrB;	excinuclease	ABC	subunit	B
D	lcl|SIZZ01000001.1_prot_TBR39561.1_975;	K03703	uvrC;	excinuclease	ABC	subunit	C
D	lcl|SIZZ01000002.1_prot_TBR36719.1_2449;	K03657	uvrD,	pcrA;	ATP-dependent	DNA	helicase	UvrD/PcrA	[EC:5.6.2.4]
D	lcl|SIZZ01000002.1_prot_TBR36753.1_2486;	K02335	polA;	DNA	polymerase	I	[EC:2.7.7.7]
D	lcl|SIZZ01000001.1_prot_TBR39609.1_1031;	K01972	E6.5.1.2,	ligA,	ligB;	DNA	ligase	(NAD+)	[EC:6.5.1.2]
C	3430	Mismatch	repair	[PATH:ko03430]
D	lcl|SIZZ01000001.1_prot_TBR38981.1_332;	K03555	mutS;	DNA	mismatch	repair	protein	MutS
D	lcl|SIZZ01000001.1_prot_TBR39019.1_373;	K03572	mutL;	DNA	mismatch	repair	protein	MutL
D	lcl|SIZZ01000002.1_prot_TBR36719.1_2449;	K03657	uvrD,	pcrA;	ATP-dependent	DNA	helicase	UvrD/PcrA	[EC:5.6.2.4]
D	lcl|SIZZ01000001.1_prot_TBR39605.1_1025;	K01141	sbcB,	exoI;	exodeoxyribonuclease	I	[EC:3.1.11.1]
D	lcl|SIZZ01000001.1_prot_TBR39082.1_442;	K03601	xseA;	exodeoxyribonuclease	VII	large	subunit	[EC:3.1.11.6]
D	lcl|SIZZ01000001.1_prot_TBR38744.1_69;	K03602	xseB;	exodeoxyribonuclease	VII	small	subunit	[EC:3.1.11.6]
D	lcl|SIZZ01000001.1_prot_TBR39544.1_957;	K07462	recJ;	single-stranded-DNA-specific	exonuclease	[EC:3.1.-.-]
D	lcl|SIZZ01000002.1_prot_TBR37006.1_2761;	K03111	ssb;	single-strand	DNA-binding	protein
D	lcl|SIZZ01000001.1_prot_TBR38747.1_73;	K02337	dnaE;	DNA	polymerase	III	subunit	alpha	[EC:2.7.7.7]
D	lcl|SIZZ01000004.1_prot_TBR35871.1_3538;	K02338	dnaN;	DNA	polymerase	III	subunit	beta	[EC:2.7.7.7]
D	lcl|SIZZ01000001.1_prot_TBR39174.1_543;	K02343	dnaX;	DNA	polymerase	III	subunit	gamma/tau	[EC:2.7.7.7]
D	lcl|SIZZ01000001.1_prot_TBR39983.1_1431;	K02340	holA;	DNA	polymerase	III	subunit	delta	[EC:2.7.7.7]
D	lcl|SIZZ01000001.1_prot_TBR39197.1_567;	K02341	holB;	DNA	polymerase	III	subunit	delta'	[EC:2.7.7.7]
D	lcl|SIZZ01000001.1_prot_TBR39683.1_1107;	K02342	dnaQ;	DNA	polymerase	III	subunit	epsilon	[EC:2.7.7.7]
D	lcl|SIZZ01000001.1_prot_TBR40291.1_1777;	K02339	holC;	DNA	polymerase	III	subunit	chi	[EC:2.7.7.7]
D	lcl|SIZZ01000001.1_prot_TBR39609.1_1031;	K01972	E6.5.1.2,	ligA,	ligB;	DNA	ligase	(NAD+)	[EC:6.5.1.2]
C	3440	Homologous	recombination	[PATH:ko03440]
D	lcl|SIZZ01000001.1_prot_TBR39544.1_957;	K07462	recJ;	single-stranded-DNA-specific	exonuclease	[EC:3.1.-.-]
D	lcl|SIZZ01000002.1_prot_TBR37006.1_2761;	K03111	ssb;	single-strand	DNA-binding	protein
D	lcl|SIZZ01000004.1_prot_TBR35870.1_3537;	K03629	recF;	DNA	replication	and	repair	protein	RecF
D	lcl|SIZZ01000001.1_prot_TBR39661.1_1084;	K03584	recO;	DNA	repair	protein	RecO	(recombination	protein	O)
D	lcl|SIZZ01000001.1_prot_TBR39176.1_545;	K06187	recR;	recombination	protein	RecR
D	lcl|SIZZ01000001.1_prot_TBR38983.1_334;	K03553	recA;	recombination	protein	RecA
D	lcl|SIZZ01000002.1_prot_TBR36753.1_2486;	K02335	polA;	DNA	polymerase	I	[EC:2.7.7.7]
D	lcl|SIZZ01000002.1_prot_TBR37055.1_2815;	K03550	ruvA;	holliday	junction	DNA	helicase	RuvA	[EC:5.6.2.4]
D	lcl|SIZZ01000002.1_prot_TBR37056.1_2817;	K03551	ruvB;	holliday	junction	DNA	helicase	RuvB	[EC:5.6.2.4]
D	lcl|SIZZ01000002.1_prot_TBR37054.1_2814;	K01159	ruvC;	crossover	junction	endodeoxyribonuclease	RuvC	[EC:3.1.21.10]
D	lcl|SIZZ01000002.1_prot_TBR36879.1_2624;	K03655	recG;	ATP-dependent	DNA	helicase	RecG	[EC:5.6.2.4]
D	lcl|SIZZ01000001.1_prot_TBR40714.1_1181;	K03582	recB;	exodeoxyribonuclease	V	beta	subunit	[EC:3.1.11.5]
D	lcl|SIZZ01000001.1_prot_TBR39749.1_1180;	K03583	recC;	exodeoxyribonuclease	V	gamma	subunit	[EC:3.1.11.5]
D	lcl|SIZZ01000001.1_prot_TBR39750.1_1182;	K03581	recD;	exodeoxyribonuclease	V	alpha	subunit	[EC:3.1.11.5]
D	lcl|SIZZ01000001.1_prot_TBR38747.1_73;	K02337	dnaE;	DNA	polymerase	III	subunit	alpha	[EC:2.7.7.7]
D	lcl|SIZZ01000004.1_prot_TBR35871.1_3538;	K02338	dnaN;	DNA	polymerase	III	subunit	beta	[EC:2.7.7.7]
D	lcl|SIZZ01000001.1_prot_TBR39174.1_543;	K02343	dnaX;	DNA	polymerase	III	subunit	gamma/tau	[EC:2.7.7.7]
D	lcl|SIZZ01000001.1_prot_TBR39983.1_1431;	K02340	holA;	DNA	polymerase	III	subunit	delta	[EC:2.7.7.7]
D	lcl|SIZZ01000001.1_prot_TBR39197.1_567;	K02341	holB;	DNA	polymerase	III	subunit	delta'	[EC:2.7.7.7]
D	lcl|SIZZ01000001.1_prot_TBR39683.1_1107;	K02342	dnaQ;	DNA	polymerase	III	subunit	epsilon	[EC:2.7.7.7]
D	lcl|SIZZ01000001.1_prot_TBR40291.1_1777;	K02339	holC;	DNA	polymerase	III	subunit	chi	[EC:2.7.7.7]
D	lcl|SIZZ01000003.1_prot_TBR36305.1_3376;	K04066	priA;	primosomal	protein	N'	(replication	factor	Y)	(superfamily	II	helicase)	[EC:3.6.4.-]
C	3450	Non-homologous	end-joining	[PATH:ko03450]
D	lcl|SIZZ01000001.1_prot_TBR39499.1_907;	K10979	ku;	DNA	end-binding	protein	Ku
D	lcl|SIZZ01000001.1_prot_TBR40670.1_636;	K01971	ligD;	bifunctional	non-homologous	end	joining	protein	LigD	[EC:6.5.1.1]
D	lcl|SIZZ01000001.1_prot_TBR39498.1_906;	K01971	ligD;	bifunctional	non-homologous	end	joining	protein	LigD	[EC:6.5.1.1]
C	3460	Fanconi	anemia	pathway	[PATH:ko03460]
B
B	9125	Information	processing	in	viruses
C	3230	Viral	genome	structure	[PATH:ko03230]
C	3240	Viral	replication	[PATH:ko03240]

## Sheet: Level 1- Environmental Info Pro
Level 1 KEGG Annotations for Environmental Information Processing
A09130	Environmental	Information	Processing
B
B	9131	Membrane	transport
C	2010	ABC	transporters	[PATH:ko02010]
D	lcl|SIZZ01000001.1_prot_TBR39512.1_922;	K23163	sbp;	sulfate/thiosulfate	transport	system	substrate-binding	protein
D	lcl|SIZZ01000001.1_prot_TBR39511.1_921;	K02046	cysU;	sulfate/thiosulfate	transport	system	permease	protein
D	lcl|SIZZ01000001.1_prot_TBR39510.1_920;	K02047	cysW;	sulfate/thiosulfate	transport	system	permease	protein
D	lcl|SIZZ01000001.1_prot_TBR39509.1_919;	K02045	cysA;	sulfate/thiosulfate	transport	system	ATP-binding	protein	[EC:7.3.2.3]
D	lcl|SIZZ01000002.1_prot_TBR36647.1_2364;	K10112	msmX,	msmK,	malK,	sugC,	ggtA,	msiK;	multiple	sugar	transport	system	ATP-binding	protein	[EC:7.5.2.-]
D	lcl|SIZZ01000002.1_prot_TBR36873.1_2618;	K07323	mlaC;	phospholipid	transport	system	substrate-binding	protein
D	lcl|SIZZ01000001.1_prot_TBR40346.1_1835;	K02067	mlaD,	linM;	phospholipid/cholesterol/gamma-HCH	transport	system	substrate-binding	protein
D	lcl|SIZZ01000002.1_prot_TBR36872.1_2617;	K02067	mlaD,	linM;	phospholipid/cholesterol/gamma-HCH	transport	system	substrate-binding	protein
D	lcl|SIZZ01000001.1_prot_TBR40344.1_1833;	K02066	mlaE,	linK;	phospholipid/cholesterol/gamma-HCH	transport	system	permease	protein
D	lcl|SIZZ01000002.1_prot_TBR36871.1_2616;	K02066	mlaE,	linK;	phospholipid/cholesterol/gamma-HCH	transport	system	permease	protein
D	lcl|SIZZ01000001.1_prot_TBR40345.1_1834;	K02065	mlaF,	linL,	mkl;	phospholipid/cholesterol/gamma-HCH	transport	system	ATP-binding	protein
D	lcl|SIZZ01000002.1_prot_TBR36870.1_2615;	K02065	mlaF,	linL,	mkl;	phospholipid/cholesterol/gamma-HCH	transport	system	ATP-binding	protein
D	lcl|SIZZ01000001.1_prot_TBR40636.1_187;	K02040	pstS;	phosphate	transport	system	substrate-binding	protein
D	lcl|SIZZ01000001.1_prot_TBR40604.1_2115;	K02040	pstS;	phosphate	transport	system	substrate-binding	protein
D	lcl|SIZZ01000001.1_prot_TBR38849.1_186;	K02037	pstC;	phosphate	transport	system	permease	protein
D	lcl|SIZZ01000001.1_prot_TBR38848.1_185;	K02038	pstA;	phosphate	transport	system	permease	protein
D	lcl|SIZZ01000001.1_prot_TBR38847.1_184;	K02036	pstB;	phosphate	transport	system	ATP-binding	protein	[EC:7.3.2.1]
D	lcl|SIZZ01000001.1_prot_TBR40639.1_212;	K02044	phnD;	phosphonate	transport	system	substrate-binding	protein
D	lcl|SIZZ01000002.1_prot_TBR37070.1_2832;	K02044	phnD;	phosphonate	transport	system	substrate-binding	protein
D	lcl|SIZZ01000001.1_prot_TBR39369.1_757;	K10001	gltI,	aatJ;	glutamate/aspartate	transport	system	substrate-binding	protein
D	lcl|SIZZ01000001.1_prot_TBR38957.1_303;	K02073	metQ;	D-methionine	transport	system	substrate-binding	protein
D	lcl|SIZZ01000001.1_prot_TBR38958.1_304;	K02072	metI;	D-methionine	transport	system	permease	protein
D	lcl|SIZZ01000001.1_prot_TBR38959.1_305;	K02071	metN;	D-methionine	transport	system	ATP-binding	protein
D	lcl|SIZZ01000001.1_prot_TBR40203.1_1678;	K06858	btuF;	vitamin	B12	transport	system	substrate-binding	protein
D	lcl|SIZZ01000001.1_prot_TBR40768.1_1855;	K09690	wzm,	rfbA;	lipopolysaccharide	transport	system	permease	protein
D	lcl|SIZZ01000001.1_prot_TBR40364.1_1854;	K09691	wzt,	rbfB;	lipopolysaccharide	transport	system	ATP-binding	protein
D	lcl|SIZZ01000003.1_prot_TBR36240.1_3303;	K09696	natB;	sodium	transport	system	permease	protein
D	lcl|SIZZ01000003.1_prot_TBR36239.1_3302;	K09697	natA;	sodium	transport	system	ATP-binding	protein	[EC:7.2.2.4]
D	lcl|SIZZ01000001.1_prot_TBR39164.1_531;	K09808	lolC_E;	lipoprotein-releasing	system	permease	protein
D	lcl|SIZZ01000001.1_prot_TBR39165.1_532;	K09810	lolD;	lipoprotein-releasing	system	ATP-binding	protein	[EC:7.6.2.-]
D	lcl|SIZZ01000001.1_prot_TBR39145.1_508;	K02195	ccmC;	heme	exporter	protein	C
D	lcl|SIZZ01000001.1_prot_TBR39146.1_509;	K02194	ccmB;	heme	exporter	protein	B
D	lcl|SIZZ01000001.1_prot_TBR39147.1_510;	K02193	ccmA;	heme	exporter	protein	A	[EC:7.6.2.5]
D	lcl|SIZZ01000001.1_prot_TBR40289.1_1775;	K07091	lptF;	lipopolysaccharide	export	system	permease	protein
D	lcl|SIZZ01000001.1_prot_TBR40288.1_1774;	K11720	lptG;	lipopolysaccharide	export	system	permease	protein
D	lcl|SIZZ01000002.1_prot_TBR37131.1_2898;	K06861	lptB;	lipopolysaccharide	export	system	ATP-binding	protein	[EC:7.5.2.5]
D	lcl|SIZZ01000003.1_prot_TBR36267.1_3333;	K09811	ftsX;	cell	division	transport	system	permease	protein
D	lcl|SIZZ01000003.1_prot_TBR36387.1_3332;	K09812	ftsE;	cell	division	transport	system	ATP-binding	protein
D	lcl|SIZZ01000001.1_prot_TBR39168.1_536;	K11085	msbA;	ATP-binding	cassette,	subfamily	B,	bacterial	MsbA	[EC:7.5.2.6]
D	lcl|SIZZ01000001.1_prot_TBR40715.1_1190;	K18893	vcaM;	ATP-binding	cassette,	subfamily	B,	multidrug	efflux	pump
C	2060	Phosphotransferase	system	(PTS)	[PATH:ko02060]
D	lcl|SIZZ01000002.1_prot_TBR37124.1_2891;	K08483	ptsI;	phosphoenolpyruvate-protein	phosphotransferase	(PTS	system	enzyme	I)	[EC:2.7.3.9]
D	lcl|SIZZ01000002.1_prot_TBR37125.1_2892;	K02784	ptsH;	phosphocarrier	protein	HPr
D	lcl|SIZZ01000002.1_prot_TBR37126.1_2893;	K02793	manXa;	mannose	PTS	system	EIIA	component	[EC:2.7.1.191]
D	lcl|SIZZ01000001.1_prot_TBR39830.1_1270;	K00882	fruK;	1-phosphofructokinase	[EC:2.7.1.56]
C	3070	Bacterial	secretion	system	[PATH:ko03070]
D	lcl|SIZZ01000003.1_prot_TBR36327.1_3400;	K12340	tolC,	bepC,	cyaE,	raxC,	sapF,	rsaF,	hasF;	outer	membrane	protein
D	lcl|SIZZ01000001.1_prot_TBR39071.1_431;	K11003	hlyD,	cyaD;	membrane	fusion	protein,	hemolysin	D
D	lcl|SIZZ01000001.1_prot_TBR38725.1_50;	K03230	yscV,	sctV,	hrcV,	ssaV,	invA;	type	III	secretion	protein	V
D	lcl|SIZZ01000001.1_prot_TBR38729.1_54;	K03225	yscQ,	sctQ,	hrcQ,	ssaQ,	spaO;	type	III	secretion	protein	Q
D	lcl|SIZZ01000002.1_prot_TBR36643.1_2360;	K02453	gspD;	general	secretion	pathway	protein	D
D	lcl|SIZZ01000002.1_prot_TBR36636.1_2351;	K02455	gspF;	general	secretion	pathway	protein	F
D	lcl|SIZZ01000002.1_prot_TBR36637.1_2352;	K02456	gspG;	general	secretion	pathway	protein	G
D	lcl|SIZZ01000002.1_prot_TBR36635.1_2350;	K02454	gspE;	general	secretion	pathway	protein	E	[EC:7.4.2.8]
D	lcl|SIZZ01000003.1_prot_TBR36019.1_3054;	K02454	gspE;	general	secretion	pathway	protein	E	[EC:7.4.2.8]
D	lcl|SIZZ01000001.1_prot_TBR40059.1_1516;	K03072	secD;	preprotein	translocase	subunit	SecD
D	lcl|SIZZ01000001.1_prot_TBR40058.1_1515;	K03074	secF;	preprotein	translocase	subunit	SecF
D	lcl|SIZZ01000001.1_prot_TBR39598.1_1018;	K03075	secG;	preprotein	translocase	subunit	SecG
D	lcl|SIZZ01000001.1_prot_TBR38698.1_23;	K03076	secY;	preprotein	translocase	subunit	SecY
D	lcl|SIZZ01000001.1_prot_TBR40738.1_1517;	K03210	yajC;	preprotein	translocase	subunit	YajC
D	lcl|SIZZ01000004.1_prot_TBR35875.1_3542;	K03217	yidC,	spoIIIJ,	OXA1,	ccfA;	YidC/Oxa1	family	membrane	protein	insertase
D	lcl|SIZZ01000002.1_prot_TBR36989.1_2744;	K03070	secA;	preprotein	translocase	subunit	SecA	[EC:7.4.2.8]
D	lcl|SIZZ01000002.1_prot_TBR37162.1_2930;	K03110	ftsY;	fused	signal	recognition	particle	receptor
D	lcl|SIZZ01000002.1_prot_TBR36611.1_2325;	K03071	secB;	preprotein	translocase	subunit	SecB
D	lcl|SIZZ01000001.1_prot_TBR39931.1_1377;	K03106	SRP54,	ffh;	signal	recognition	particle	subunit	SRP54	[EC:3.6.5.4]
D	lcl|SIZZ01000003.1_prot_TBR36247.1_3310;	K03118	tatC;	sec-independent	protein	translocase	protein	TatC
D	lcl|SIZZ01000002.1_prot_TBR36968.1_2721;	K03204	virB9,	lvhB9;	type	IV	secretion	system	protein	VirB9
D	lcl|SIZZ01000002.1_prot_TBR36969.1_2722;	K03203	virB8,	lvhB8;	type	IV	secretion	system	protein	VirB8
D	lcl|SIZZ01000002.1_prot_TBR37323.1_2720;	K03195	virB10,	lvhB10;	type	IV	secretion	system	protein	VirB10
D	lcl|SIZZ01000002.1_prot_TBR36963.1_2715;	K03199	virB4,	lvhB4;	type	IV	secretion	system	protein	VirB4	[EC:7.4.2.8]
D	lcl|SIZZ01000002.1_prot_TBR36967.1_2719;	K03196	virB11,	lvhB11;	type	IV	secretion	system	protein	VirB11	[EC:7.4.2.8]
D	lcl|SIZZ01000002.1_prot_TBR36960.1_2712;	K03205	virD4,	lvhD4;	type	IV	secretion	system	protein	VirD4	[EC:7.4.2.8]
D	lcl|SIZZ01000001.1_prot_TBR40278.1_1762;	K11904	vgrG;	type	VI	secretion	system	secreted	protein	VgrG
B
B	9132	Signal	transduction
C	2020	Two-component	system	[PATH:ko02020]
D	lcl|SIZZ01000001.1_prot_TBR38993.1_345;	K07636	phoR;	two-component	system,	OmpR	family,	phosphate	regulon	sensor	histidine	kinase	PhoR	[EC:2.7.13.3]
D	lcl|SIZZ01000001.1_prot_TBR38994.1_346;	K07657	phoB;	two-component	system,	OmpR	family,	phosphate	regulon	response	regulator	PhoB
D	lcl|SIZZ01000003.1_prot_TBR36128.1_3179;	K01077	E3.1.3.1,	phoA,	phoB;	alkaline	phosphatase	[EC:3.1.3.1]
D	lcl|SIZZ01000001.1_prot_TBR40636.1_187;	K02040	pstS;	phosphate	transport	system	substrate-binding	protein
D	lcl|SIZZ01000001.1_prot_TBR40604.1_2115;	K02040	pstS;	phosphate	transport	system	substrate-binding	protein
D	lcl|SIZZ01000001.1_prot_TBR40472.1_1973;	K07637	phoQ;	two-component	system,	OmpR	family,	sensor	histidine	kinase	PhoQ	[EC:2.7.13.3]
D	lcl|SIZZ01000001.1_prot_TBR40473.1_1974;	K07660	phoP;	two-component	system,	OmpR	family,	response	regulator	PhoP
D	lcl|SIZZ01000002.1_prot_TBR36663.1_2383;	K09474	phoN;	acid	phosphatase	(class	A)	[EC:3.1.3.2]
D	lcl|SIZZ01000001.1_prot_TBR38911.1_253;	K07662	cpxR;	two-component	system,	OmpR	family,	response	regulator	CpxR
D	lcl|SIZZ01000001.1_prot_TBR39666.1_1090;	K04771	degP,	htrA;	serine	protease	Do	[EC:3.4.21.107]
D	lcl|SIZZ01000001.1_prot_TBR40603.1_2114;	K04771	degP,	htrA;	serine	protease	Do	[EC:3.4.21.107]
D	lcl|SIZZ01000003.1_prot_TBR36207.1_3269;	K07799	mdtA;	membrane	fusion	protein,	multidrug	efflux	system
D	lcl|SIZZ01000003.1_prot_TBR36208.1_3270;	K07788	mdtB;	multidrug	efflux	pump
D	lcl|SIZZ01000001.1_prot_TBR39741.1_1172;	K07645	qseC;	two-component	system,	OmpR	family,	sensor	histidine	kinase	QseC	[EC:2.7.13.3]
D	lcl|SIZZ01000003.1_prot_TBR36194.1_3253;	K07645	qseC;	two-component	system,	OmpR	family,	sensor	histidine	kinase	QseC	[EC:2.7.13.3]
D	lcl|SIZZ01000001.1_prot_TBR39740.1_1171;	K07666	qseB;	two-component	system,	OmpR	family,	response	regulator	QseB
D	lcl|SIZZ01000003.1_prot_TBR36263.1_3328;	K07666	qseB;	two-component	system,	OmpR	family,	response	regulator	QseB
D	lcl|SIZZ01000002.1_prot_TBR37191.1_2959;	K02406	fliC,	hag;	flagellin
D	lcl|SIZZ01000002.1_prot_TBR37212.1_2983;	K02405	fliA,	whiG;	RNA	polymerase	sigma	factor	FliA
D	lcl|SIZZ01000002.1_prot_TBR37216.1_2987;	K02556	motA;	chemotaxis	protein	MotA
D	lcl|SIZZ01000002.1_prot_TBR36618.1_2333;	K07646	kdpD;	two-component	system,	OmpR	family,	sensor	histidine	kinase	KdpD	[EC:2.7.13.3]
D	lcl|SIZZ01000002.1_prot_TBR36617.1_2332;	K07667	kdpE;	two-component	system,	OmpR	family,	KDP	operon	response	regulator	KdpE
D	lcl|SIZZ01000002.1_prot_TBR36623.1_2338;	K01546	kdpA;	potassium-transporting	ATPase	potassium-binding	subunit
D	lcl|SIZZ01000002.1_prot_TBR36622.1_2337;	K01547	kdpB;	potassium-transporting	ATPase	ATP-binding	subunit	[EC:7.2.2.6]
D	lcl|SIZZ01000002.1_prot_TBR36619.1_2334;	K01548	kdpC;	potassium-transporting	ATPase	KdpC	subunit
D	lcl|SIZZ01000001.1_prot_TBR40292.1_1778;	K07648	arcB;	two-component	system,	OmpR	family,	aerobic	respiration	control	sensor	histidine	kinase	ArcB	[EC:2.7.13.3]
D	lcl|SIZZ01000001.1_prot_TBR40034.1_1487;	K07649	tctE;	two-component	system,	OmpR	family,	sensor	histidine	kinase	TctE	[EC:2.7.13.3]
D	lcl|SIZZ01000003.1_prot_TBR36262.1_3327;	K07649	tctE;	two-component	system,	OmpR	family,	sensor	histidine	kinase	TctE	[EC:2.7.13.3]
D	lcl|SIZZ01000001.1_prot_TBR40033.1_1486;	K07774	tctD;	two-component	system,	OmpR	family,	response	regulator	TctD
D	lcl|SIZZ01000002.1_prot_TBR36671.1_2392;	K02259	COX15,	ctaA;	heme	a	synthase	[EC:1.17.99.9]
D	lcl|SIZZ01000001.1_prot_TBR38711.1_36;	K07669	mprA;	two-component	system,	OmpR	family,	response	regulator	MprA
D	lcl|SIZZ01000004.1_prot_TBR35872.1_3539;	K02313	dnaA;	chromosomal	replication	initiator	protein
D	lcl|SIZZ01000001.1_prot_TBR40272.1_1756;	K14205	mprF,	fmtC;	phosphatidylglycerol	lysyltransferase	[EC:2.3.2.3]
D	lcl|SIZZ01000002.1_prot_TBR36816.1_2557;	K14981	chvI;	two-component	system,	OmpR	family,	response	regulator	ChvI
D	lcl|SIZZ01000002.1_prot_TBR36821.1_2563;	K08641	vanX;	zinc	D-Ala-D-Ala	dipeptidase	[EC:3.4.13.22]
D	lcl|SIZZ01000002.1_prot_TBR36751.1_2484;	K01644	citE;	citrate	lyase	subunit	beta	/	citryl-CoA	lyase	[EC:4.1.3.34]
D	lcl|SIZZ01000001.1_prot_TBR40481.1_1984;	K07704	lytS;	two-component	system,	LytTR	family,	sensor	histidine	kinase	LytS	[EC:2.7.13.3]
D	lcl|SIZZ01000003.1_prot_TBR36218.1_3281;	K07705	lytT,	lytR;	two-component	system,	LytTR	family,	response	regulator	LytT
D	lcl|SIZZ01000004.1_prot_TBR35926.1_3593;	K08082	algZ;	two-component	system,	LytTR	family,	sensor	histidine	kinase	AlgZ	[EC:2.7.13.3]
D	lcl|SIZZ01000004.1_prot_TBR35927.1_3594;	K08083	algR;	two-component	system,	LytTR	family,	response	regulator	AlgR
D	lcl|SIZZ01000001.1_prot_TBR39440.1_841;	K00066	algD;	GDP-mannose	6-dehydrogenase	[EC:1.1.1.132]
D	lcl|SIZZ01000003.1_prot_TBR36239.1_3302;	K09697	natA;	sodium	transport	system	ATP-binding	protein	[EC:7.2.2.4]
D	lcl|SIZZ01000003.1_prot_TBR36240.1_3303;	K09696	natB;	sodium	transport	system	permease	protein
D	lcl|SIZZ01000001.1_prot_TBR40674.1_665;	K07675	uhpB;	two-component	system,	NarL	family,	sensor	histidine	kinase	UhpB	[EC:2.7.13.3]
D	lcl|SIZZ01000001.1_prot_TBR39283.1_666;	K07686	uhpA;	two-component	system,	NarL	family,	uhpT	operon	response	regulator	UhpA
D	lcl|SIZZ01000001.1_prot_TBR39042.1_398;	K07687	rcsB;	two-component	system,	NarL	family,	captular	synthesis	response	regulator	RcsB
D	lcl|SIZZ01000001.1_prot_TBR40493.1_1998;	K07687	rcsB;	two-component	system,	NarL	family,	captular	synthesis	response	regulator	RcsB
D	lcl|SIZZ01000001.1_prot_TBR39558.1_972;	K07689	uvrY,	gacA,	varA;	two-component	system,	NarL	family,	invasion	response	regulator	UvrY
D	lcl|SIZZ01000001.1_prot_TBR38986.1_337;	K03563	csrA;	carbon	storage	regulator
D	lcl|SIZZ01000001.1_prot_TBR40491.1_1996;	K07679	evgS,	bvgS;	two-component	system,	NarL	family,	sensor	histidine	kinase	EvgS	[EC:2.7.13.3]
D	lcl|SIZZ01000001.1_prot_TBR39043.1_399;	K07688	fimZ;	two-component	system,	NarL	family,	response	regulator,	fimbrial	Z	protein,	FimZ
D	lcl|SIZZ01000001.1_prot_TBR39516.1_926;	K07777	degS;	two-component	system,	NarL	family,	sensor	histidine	kinase	DegS	[EC:2.7.13.3]
D	lcl|SIZZ01000001.1_prot_TBR40065.1_1523;	K07778	desK;	two-component	system,	NarL	family,	sensor	histidine	kinase	DesK	[EC:2.7.13.3]
D	lcl|SIZZ01000001.1_prot_TBR40066.1_1524;	K07778	desK;	two-component	system,	NarL	family,	sensor	histidine	kinase	DesK	[EC:2.7.13.3]
D	lcl|SIZZ01000001.1_prot_TBR40064.1_1522;	K07693	desR;	two-component	system,	NarL	family,	response	regulator	DesR
D	lcl|SIZZ01000001.1_prot_TBR38765.1_92;	K00990	glnD;	[protein-PII]	uridylyltransferase	[EC:2.7.7.59]
D	lcl|SIZZ01000001.1_prot_TBR40050.1_1504;	K04751	glnB;	nitrogen	regulatory	protein	P-II	1
D	lcl|SIZZ01000002.1_prot_TBR36555.1_2267;	K04751	glnB;	nitrogen	regulatory	protein	P-II	1
D	lcl|SIZZ01000003.1_prot_TBR36097.1_3142;	K07708	glnL,	ntrB;	two-component	system,	NtrC	family,	nitrogen	regulation	sensor	histidine	kinase	GlnL	[EC:2.7.13.3]
D	lcl|SIZZ01000003.1_prot_TBR36098.1_3143;	K07712	glnG,	ntrC;	two-component	system,	NtrC	family,	nitrogen	regulation	response	regulator	GlnG
D	lcl|SIZZ01000004.1_prot_TBR35804.1_3465;	K01915	glnA,	GLUL;	glutamine	synthetase	[EC:6.3.1.2]
D	lcl|SIZZ01000001.1_prot_TBR40224.1_1701;	K13598	ntrY;	two-component	system,	NtrC	family,	nitrogen	regulation	sensor	histidine	kinase	NtrY	[EC:2.7.13.3]
D	lcl|SIZZ01000002.1_prot_TBR36903.1_2652;	K02106	atoE;	short-chain	fatty	acids	transporter
D	lcl|SIZZ01000001.1_prot_TBR39812.1_1251;	K00626	ACAT,	atoB;	acetyl-CoA	C-acetyltransferase	[EC:2.3.1.9]
D	lcl|SIZZ01000003.1_prot_TBR36102.1_3147;	K00626	ACAT,	atoB;	acetyl-CoA	C-acetyltransferase	[EC:2.3.1.9]
D	lcl|SIZZ01000002.1_prot_TBR37024.1_2780;	K02668	pilS,	pehS;	two-component	system,	NtrC	family,	sensor	histidine	kinase	PilS	[EC:2.7.13.3]
D	lcl|SIZZ01000002.1_prot_TBR37023.1_2779;	K02667	pilR,	pehR;	two-component	system,	NtrC	family,	response	regulator	PilR
D	lcl|SIZZ01000002.1_prot_TBR37130.1_2897;	K03092	rpoN;	RNA	polymerase	sigma-54	factor
D	lcl|SIZZ01000001.1_prot_TBR40135.1_1603;	K02650	pilA;	type	IV	pilus	assembly	protein	PilA
D	lcl|SIZZ01000001.1_prot_TBR40226.1_1703;	K11384	algB;	two-component	system,	NtrC	family,	response	regulator	AlgB
D	lcl|SIZZ01000001.1_prot_TBR40316.1_1804;	K00575	cheR;	chemotaxis	protein	methyltransferase	CheR	[EC:2.1.1.80]
D	lcl|SIZZ01000002.1_prot_TBR37230.1_3001;	K00575	cheR;	chemotaxis	protein	methyltransferase	CheR	[EC:2.1.1.80]
D	lcl|SIZZ01000001.1_prot_TBR40075.1_1534;	K03406	mcp;	methyl-accepting	chemotaxis	protein
D	lcl|SIZZ01000002.1_prot_TBR37227.1_2998;	K03406	mcp;	methyl-accepting	chemotaxis	protein
D	lcl|SIZZ01000002.1_prot_TBR37229.1_3000;	K03406	mcp;	methyl-accepting	chemotaxis	protein
D	lcl|SIZZ01000002.1_prot_TBR37232.1_3004;	K03406	mcp;	methyl-accepting	chemotaxis	protein
D	lcl|SIZZ01000002.1_prot_TBR37218.1_2989;	K03408	cheW;	purine-binding	chemotaxis	protein	CheW
D	lcl|SIZZ01000002.1_prot_TBR37228.1_2999;	K03408	cheW;	purine-binding	chemotaxis	protein	CheW
D	lcl|SIZZ01000002.1_prot_TBR37215.1_2986;	K03407	cheA;	two-component	system,	chemotaxis	family,	sensor	kinase	CheA	[EC:2.7.13.3]
D	lcl|SIZZ01000002.1_prot_TBR37226.1_2997;	K03407	cheA;	two-component	system,	chemotaxis	family,	sensor	kinase	CheA	[EC:2.7.13.3]
D	lcl|SIZZ01000002.1_prot_TBR37213.1_2984;	K03413	cheY;	two-component	system,	chemotaxis	family,	chemotaxis	protein	CheY
D	lcl|SIZZ01000002.1_prot_TBR37225.1_2996;	K03413	cheY;	two-component	system,	chemotaxis	family,	chemotaxis	protein	CheY
D	lcl|SIZZ01000002.1_prot_TBR37231.1_3003;	K03412	cheB;	two-component	system,	chemotaxis	family,	protein-glutamate	methylesterase/glutaminase	[EC:3.1.1.61	3.5.1.44]
D	lcl|SIZZ01000001.1_prot_TBR40188.1_1661;	K02660	pilJ;	twitching	motility	protein	PilJ
D	lcl|SIZZ01000001.1_prot_TBR40753.1_1662;	K02659	pilI;	twitching	motility	protein	PilI
D	lcl|SIZZ01000001.1_prot_TBR40187.1_1660;	K06596	chpA;	chemosensory	pili	system	protein	ChpA	(sensor	histidine	kinase/response	regulator)
D	lcl|SIZZ01000001.1_prot_TBR40754.1_1664;	K02657	pilG;	twitching	motility	two-component	system	response	regulator	PilG
D	lcl|SIZZ01000001.1_prot_TBR39229.1_601;	K02658	pilH;	twitching	motility	two-component	system	response	regulator	PilH
D	lcl|SIZZ01000001.1_prot_TBR40189.1_1663;	K02658	pilH;	twitching	motility	two-component	system	response	regulator	PilH
D	lcl|SIZZ01000001.1_prot_TBR40186.1_1659;	K06597	chpB;	chemosensory	pili	system	protein	ChpB	(putative	protein-glutamate	methylesterase)
D	lcl|SIZZ01000001.1_prot_TBR40185.1_1658;	K06598	chpC;	chemosensory	pili	system	protein	ChpC
D	lcl|SIZZ01000001.1_prot_TBR40076.1_1535;	K13486	wspC;	chemotaxis	protein	methyltransferase	WspC
D	lcl|SIZZ01000001.1_prot_TBR39725.1_1153;	K11444	wspR;	two-component	system,	chemotaxis	family,	response	regulator	WspR	[EC:2.7.7.65]
D	lcl|SIZZ01000002.1_prot_TBR37021.1_2776;	K11354	cph1;	two-component	system,	chemotaxis	family,	sensor	kinase	Cph1	[EC:2.7.13.3]
D	lcl|SIZZ01000001.1_prot_TBR40100.1_1563;	K02488	pleD;	two-component	system,	cell	cycle	response	regulator	[EC:2.7.7.65]
D	lcl|SIZZ01000001.1_prot_TBR40318.1_1806;	K18444	rrp1;	two-component	system,	glycerol	uptake	and	utilization	response	regulator
D	lcl|SIZZ01000001.1_prot_TBR39515.1_925;	K14979	ssrB;	two-component	system,	LuxR	family,	secretion	system	response	regulator	SsrB
D	lcl|SIZZ01000002.1_prot_TBR37196.1_2964;	K10941	flrA,	fleQ,	flaK;	sigma-54	dependent	transcriptional	regulator,	flagellar	regulatory	protein
D	lcl|SIZZ01000001.1_prot_TBR39369.1_757;	K10001	gltI,	aatJ;	glutamate/aspartate	transport	system	substrate-binding	protein
D	lcl|SIZZ01000001.1_prot_TBR40265.1_1747;	K10914	crp;	CRP/FNR	family	transcriptional	regulator,	cyclic	AMP	receptor	protein
D	lcl|SIZZ01000002.1_prot_TBR36841.1_2584;	K10914	crp;	CRP/FNR	family	transcriptional	regulator,	cyclic	AMP	receptor	protein
D	lcl|SIZZ01000001.1_prot_TBR40750.1_1633;	K15011	regB,	regS,	actS;	two-component	system,	sensor	histidine	kinase	RegB	[EC:2.7.13.3]
D	lcl|SIZZ01000001.1_prot_TBR40163.1_1634;	K15012	regA,	regR,	actR;	two-component	system,	response	regulator	RegA
D	lcl|SIZZ01000001.1_prot_TBR40120.1_1587;	K00411	UQCRFS1,	RIP1,	petA;	ubiquinol-cytochrome	c	reductase	iron-sulfur	subunit	[EC:7.1.1.8]
D	lcl|SIZZ01000001.1_prot_TBR40119.1_1586;	K00412	CYTB,	petB;	ubiquinol-cytochrome	c	reductase	cytochrome	b	subunit
D	lcl|SIZZ01000001.1_prot_TBR40746.1_1585;	K00413	CYC1,	CYT1,	petC;	ubiquinol-cytochrome	c	reductase	cytochrome	c1	subunit
D	lcl|SIZZ01000001.1_prot_TBR40690.1_884;	K08738	CYC;	cytochrome	c
D	lcl|SIZZ01000001.1_prot_TBR39344.1_730;	K00404	ccoN;	cytochrome	c	oxidase	cbb3-type	subunit	I	[EC:7.1.1.9]
D	lcl|SIZZ01000001.1_prot_TBR39639.1_1062;	K00404	ccoN;	cytochrome	c	oxidase	cbb3-type	subunit	I	[EC:7.1.1.9]
D	lcl|SIZZ01000001.1_prot_TBR39343.1_729;	K00405	ccoO;	cytochrome	c	oxidase	cbb3-type	subunit	II
D	lcl|SIZZ01000001.1_prot_TBR39640.1_1063;	K00405	ccoO;	cytochrome	c	oxidase	cbb3-type	subunit	II
D	lcl|SIZZ01000001.1_prot_TBR39341.1_727;	K00406	ccoP;	cytochrome	c	oxidase	cbb3-type	subunit	III
D	lcl|SIZZ01000001.1_prot_TBR39642.1_1065;	K00406	ccoP;	cytochrome	c	oxidase	cbb3-type	subunit	III
D	lcl|SIZZ01000002.1_prot_TBR36860.1_2604;	K00425	cydA;	cytochrome	bd	ubiquinol	oxidase	subunit	I	[EC:7.1.1.7]
D	lcl|SIZZ01000002.1_prot_TBR36859.1_2603;	K00426	cydB;	cytochrome	bd	ubiquinol	oxidase	subunit	II	[EC:7.1.1.7]
D	lcl|SIZZ01000003.1_prot_TBR36327.1_3400;	K12340	tolC,	bepC,	cyaE,	raxC,	sapF,	rsaF,	hasF;	outer	membrane	protein
D	lcl|SIZZ01000003.1_prot_TBR36139.1_3194;	K01991	wza,	gfcE;	polysaccharide	biosynthesis/export	protein
D	lcl|SIZZ01000001.1_prot_TBR39562.1_976;	K25307	wzb,	etp;	low	molecular	weight	protein-tyrosine	phosphatase	[EC:3.1.3.48]
D	lcl|SIZZ01000001.1_prot_TBR39335.1_721;	K07165	fecR;	transmembrane	sensor
D	lcl|SIZZ01000002.1_prot_TBR37270.1_3046;	K07165	fecR;	transmembrane	sensor
D	lcl|SIZZ01000002.1_prot_TBR37233.1_3005;	K20978	hsbA;	HptB-dependent	secretion	and	biofilm	anti	anti-sigma	factor
C	4010	MAPK	signaling	pathway	[PATH:ko04010]
C	4013	MAPK	signaling	pathway	-	fly	[PATH:ko04013]
D	lcl|SIZZ01000001.1_prot_TBR40111.1_1576;	K04564	SOD2;	superoxide	dismutase,	Fe-Mn	family	[EC:1.15.1.1]
C	4016	MAPK	signaling	pathway	-	plant	[PATH:ko04016]
D	lcl|SIZZ01000001.1_prot_TBR39319.1_704;	K00940	ndk,	NME;	nucleoside-diphosphate	kinase	[EC:2.7.4.6]
D	lcl|SIZZ01000001.1_prot_TBR39074.1_434;	K17686	copA,	ctpA,	ATP7;	P-type	Cu+	transporter	[EC:7.2.2.8]
C	4011	MAPK	signaling	pathway	-	yeast	[PATH:ko04011]
C	4012	ErbB	signaling	pathway	[PATH:ko04012]
C	4014	Ras	signaling	pathway	[PATH:ko04014]
C	4015	Rap1	signaling	pathway	[PATH:ko04015]
C	4310	Wnt	signaling	pathway	[PATH:ko04310]
C	4330	Notch	signaling	pathway	[PATH:ko04330]
C	4340	Hedgehog	signaling	pathway	[PATH:ko04340]
C	4341	Hedgehog	signaling	pathway	-	fly	[PATH:ko04341]
C	4350	TGF-beta	signaling	pathway	[PATH:ko04350]
C	4390	Hippo	signaling	pathway	[PATH:ko04390]
C	4391	Hippo	signaling	pathway	-	fly	[PATH:ko04391]
C	4392	Hippo	signaling	pathway	-	multiple	species	[PATH:ko04392]
C	4370	VEGF	signaling	pathway	[PATH:ko04370]
C	4371	Apelin	signaling	pathway	[PATH:ko04371]
C	4630	JAK-STAT	signaling	pathway	[PATH:ko04630]
C	4064	NF-kappa	B	signaling	pathway	[PATH:ko04064]
C	4668	TNF	signaling	pathway	[PATH:ko04668]
C	4066	HIF-1	signaling	pathway	[PATH:ko04066]
D	lcl|SIZZ01000001.1_prot_TBR40446.1_1946;	K00134	GAPDH,	gapA;	glyceraldehyde	3-phosphate	dehydrogenase	(phosphorylating)	[EC:1.2.1.12]
D	lcl|SIZZ01000001.1_prot_TBR40441.1_1941;	K01623	ALDO;	fructose-bisphosphate	aldolase,	class	I	[EC:4.1.2.13]
D	lcl|SIZZ01000001.1_prot_TBR39123.1_484;	K01689	ENO,	eno;	enolase	[EC:4.2.1.11]
D	lcl|SIZZ01000001.1_prot_TBR40380.1_1872;	K00927	PGK,	pgk;	phosphoglycerate	kinase	[EC:2.7.2.3]
C	4068	FoxO	signaling	pathway	[PATH:ko04068]
D	lcl|SIZZ01000001.1_prot_TBR40111.1_1576;	K04564	SOD2;	superoxide	dismutase,	Fe-Mn	family	[EC:1.15.1.1]
D	lcl|SIZZ01000001.1_prot_TBR40323.1_1811;	K01596	E4.1.1.32,	pckA,	PCK;	phosphoenolpyruvate	carboxykinase	(GTP)	[EC:4.1.1.32]
C	4020	Calcium	signaling	pathway	[PATH:ko04020]
C	4070	Phosphatidylinositol	signaling	system	[PATH:ko04070]
D	lcl|SIZZ01000002.1_prot_TBR37144.1_2912;	K01092	E3.1.3.25,	IMPA,	suhB;	myo-inositol-1(or	4)-monophosphatase	[EC:3.1.3.25]
D	lcl|SIZZ01000001.1_prot_TBR40161.1_1631;	K00901	dgkA,	DGK;	diacylglycerol	kinase	(ATP)	[EC:2.7.1.107]
D	lcl|SIZZ01000001.1_prot_TBR38757.1_84;	K00981	E2.7.7.41,	CDS1,	CDS2,	cdsA;	phosphatidate	cytidylyltransferase	[EC:2.7.7.41]
C	4072	Phospholipase	D	signaling	pathway	[PATH:ko04072]
D	lcl|SIZZ01000001.1_prot_TBR40161.1_1631;	K00901	dgkA,	DGK;	diacylglycerol	kinase	(ATP)	[EC:2.7.1.107]
C	4071	Sphingolipid	signaling	pathway	[PATH:ko04071]
C	4024	cAMP	signaling	pathway	[PATH:ko04024]
C	4022	cGMP-PKG	signaling	pathway	[PATH:ko04022]
C	4151	PI3K-Akt	signaling	pathway	[PATH:ko04151]
D	lcl|SIZZ01000001.1_prot_TBR38976.1_326;	K04079	HSP90A,	htpG;	molecular	chaperone	HtpG
D	lcl|SIZZ01000001.1_prot_TBR40323.1_1811;	K01596	E4.1.1.32,	pckA,	PCK;	phosphoenolpyruvate	carboxykinase	(GTP)	[EC:4.1.1.32]
C	4152	AMPK	signaling	pathway	[PATH:ko04152]
D	lcl|SIZZ01000004.1_prot_TBR35844.1_3507;	K03841	FBP,	fbp;	fructose-1,6-bisphosphatase	I	[EC:3.1.3.11]
D	lcl|SIZZ01000001.1_prot_TBR40323.1_1811;	K01596	E4.1.1.32,	pckA,	PCK;	phosphoenolpyruvate	carboxykinase	(GTP)	[EC:4.1.1.32]
D	lcl|SIZZ01000002.1_prot_TBR36604.1_2317;	K00507	SCD,	desC;	stearoyl-CoA	desaturase	(Delta-9	desaturase)	[EC:1.14.19.1]
C	4150	mTOR	signaling	pathway	[PATH:ko04150]
D	lcl|SIZZ01000002.1_prot_TBR36808.1_2548;	K13780	SLC7A5,	LAT1;	solute	carrier	family	7	(L-type	amino	acid	transporter),	member	5
C	4075	Plant	hormone	signal	transduction	[PATH:ko04075]
B
B	9133	Signaling	molecules	and	interaction
C	4080	Neuroactive	ligand-receptor	interaction	[PATH:ko04080]
C	4060	Cytokine-cytokine	receptor	interaction	[PATH:ko04060]
C	4061	Viral	protein	interaction	with	cytokine	and	cytokine	receptor	[PATH:ko04061]
C	4512	ECM-receptor	interaction	[PATH:ko04512]
C	4514	Cell	adhesion	molecules	[PATH:ko04514]

## Sheet: Level 1-Organismal Systems
Level 1 KEGG Annotations for Organismal Systems
A09150	Organismal	Systems
B
B	9151	Immune	system
C	4640	Hematopoietic	cell	lineage	[PATH:ko04640]
C	4610	Complement	and	coagulation	cascades	[PATH:ko04610]
C	4611	Platelet	activation	[PATH:ko04611]
C	4613	Neutrophil	extracellular	trap	formation	[PATH:ko04613]
C	4620	Toll-like	receptor	signaling	pathway	[PATH:ko04620]
C	4624	Toll	and	Imd	signaling	pathway	[PATH:ko04624]
C	4621	NOD-like	receptor	signaling	pathway	[PATH:ko04621]
D	lcl|SIZZ01000003.1_prot_TBR36265.1_3330;	K03671	trxA;	thioredoxin	1
D	lcl|SIZZ01000001.1_prot_TBR38976.1_326;	K04079	HSP90A,	htpG;	molecular	chaperone	HtpG
D	lcl|SIZZ01000002.1_prot_TBR37191.1_2959;	K02406	fliC,	hag;	flagellin
C	4622	RIG-I-like	receptor	signaling	pathway	[PATH:ko04622]
C	4623	Cytosolic	DNA-sensing	pathway	[PATH:ko04623]
C	4625	C-type	lectin	receptor	signaling	pathway	[PATH:ko04625]
C	4650	Natural	killer	cell	mediated	cytotoxicity	[PATH:ko04650]
C	4612	Antigen	processing	and	presentation	[PATH:ko04612]
D	lcl|SIZZ01000001.1_prot_TBR38976.1_326;	K04079	HSP90A,	htpG;	molecular	chaperone	HtpG
C	4660	T	cell	receptor	signaling	pathway	[PATH:ko04660]
C	4658	Th1	and	Th2	cell	differentiation	[PATH:ko04658]
C	4659	Th17	cell	differentiation	[PATH:ko04659]
D	lcl|SIZZ01000001.1_prot_TBR38976.1_326;	K04079	HSP90A,	htpG;	molecular	chaperone	HtpG
C	4657	IL-17	signaling	pathway	[PATH:ko04657]
D	lcl|SIZZ01000001.1_prot_TBR38976.1_326;	K04079	HSP90A,	htpG;	molecular	chaperone	HtpG
C	4662	B	cell	receptor	signaling	pathway	[PATH:ko04662]
C	4664	Fc	epsilon	RI	signaling	pathway	[PATH:ko04664]
C	4666	Fc	gamma	R-mediated	phagocytosis	[PATH:ko04666]
C	4670	Leukocyte	transendothelial	migration	[PATH:ko04670]
C	4672	Intestinal	immune	network	for	IgA	production	[PATH:ko04672]
C	4062	Chemokine	signaling	pathway	[PATH:ko04062]
B
B	9152	Endocrine	system
C	4911	Insulin	secretion	[PATH:ko04911]
C	4910	Insulin	signaling	pathway	[PATH:ko04910]
D	lcl|SIZZ01000004.1_prot_TBR35844.1_3507;	K03841	FBP,	fbp;	fructose-1,6-bisphosphatase	I	[EC:3.1.3.11]
D	lcl|SIZZ01000001.1_prot_TBR40323.1_1811;	K01596	E4.1.1.32,	pckA,	PCK;	phosphoenolpyruvate	carboxykinase	(GTP)	[EC:4.1.1.32]
C	4922	Glucagon	signaling	pathway	[PATH:ko04922]
D	lcl|SIZZ01000001.1_prot_TBR40323.1_1811;	K01596	E4.1.1.32,	pckA,	PCK;	phosphoenolpyruvate	carboxykinase	(GTP)	[EC:4.1.1.32]
D	lcl|SIZZ01000004.1_prot_TBR35844.1_3507;	K03841	FBP,	fbp;	fructose-1,6-bisphosphatase	I	[EC:3.1.3.11]
D	lcl|SIZZ01000002.1_prot_TBR36553.1_2265;	K01834	PGAM,	gpmA;	2,3-bisphosphoglycerate-dependent	phosphoglycerate	mutase	[EC:5.4.2.11]
D	lcl|SIZZ01000001.1_prot_TBR40443.1_1943;	K00873	PK,	pyk;	pyruvate	kinase	[EC:2.7.1.40]
C	4923	Regulation	of	lipolysis	in	adipocytes	[PATH:ko04923]
C	4920	Adipocytokine	signaling	pathway	[PATH:ko04920]
D	lcl|SIZZ01000001.1_prot_TBR39577.1_993;	K01897	ACSL,	fadD;	long-chain	acyl-CoA	synthetase	[EC:6.2.1.3]
D	lcl|SIZZ01000001.1_prot_TBR40323.1_1811;	K01596	E4.1.1.32,	pckA,	PCK;	phosphoenolpyruvate	carboxykinase	(GTP)	[EC:4.1.1.32]
C	3320	PPAR	signaling	pathway	[PATH:ko03320]
D	lcl|SIZZ01000002.1_prot_TBR36780.1_2517;	K00029	E1.1.1.40,	maeB;	malate	dehydrogenase	(oxaloacetate-decarboxylating)(NADP+)	[EC:1.1.1.40]
D	lcl|SIZZ01000002.1_prot_TBR36604.1_2317;	K00507	SCD,	desC;	stearoyl-CoA	desaturase	(Delta-9	desaturase)	[EC:1.14.19.1]
D	lcl|SIZZ01000001.1_prot_TBR39301.1_685;	K08762	DBI,	ACBP;	diazepam-binding	inhibitor	(GABA	receptor	modulator,	acyl-CoA-binding	protein)
D	lcl|SIZZ01000001.1_prot_TBR39577.1_993;	K01897	ACSL,	fadD;	long-chain	acyl-CoA	synthetase	[EC:6.2.1.3]
D	lcl|SIZZ01000002.1_prot_TBR37252.1_3026;	K00249	ACADM,	acd;	acyl-CoA	dehydrogenase	[EC:1.3.8.7]
D	lcl|SIZZ01000001.1_prot_TBR40323.1_1811;	K01596	E4.1.1.32,	pckA,	PCK;	phosphoenolpyruvate	carboxykinase	(GTP)	[EC:4.1.1.32]
D	lcl|SIZZ01000001.1_prot_TBR40791.1_2138;	K00864	glpK,	GK;	glycerol	kinase	[EC:2.7.1.30]
C	4929	GnRH	secretion	[PATH:ko04929]
C	4912	GnRH	signaling	pathway	[PATH:ko04912]
C	4913	Ovarian	steroidogenesis	[PATH:ko04913]
C	4915	Estrogen	signaling	pathway	[PATH:ko04915]
D	lcl|SIZZ01000001.1_prot_TBR38976.1_326;	K04079	HSP90A,	htpG;	molecular	chaperone	HtpG
C	4914	Progesterone-mediated	oocyte	maturation	[PATH:ko04914]
D	lcl|SIZZ01000001.1_prot_TBR38976.1_326;	K04079	HSP90A,	htpG;	molecular	chaperone	HtpG
C	4917	Prolactin	signaling	pathway	[PATH:ko04917]
C	4921	Oxytocin	signaling	pathway	[PATH:ko04921]
C	4926	Relaxin	signaling	pathway	[PATH:ko04926]
C	4935	Growth	hormone	synthesis,	secretion	and	action	[PATH:ko04935]
C	4918	Thyroid	hormone	synthesis	[PATH:ko04918]
D	lcl|SIZZ01000001.1_prot_TBR38960.1_306;	K00432	gpx,	btuE,	bsaA;	glutathione	peroxidase	[EC:1.11.1.9]
D	lcl|SIZZ01000001.1_prot_TBR39949.1_1396;	K00383	GSR,	gor;	glutathione	reductase	(NADPH)	[EC:1.8.1.7]
C	4919	Thyroid	hormone	signaling	pathway	[PATH:ko04919]
C	4928	Parathyroid	hormone	synthesis,	secretion	and	action	[PATH:ko04928]
C	4916	Melanogenesis	[PATH:ko04916]
C	4924	Renin	secretion	[PATH:ko04924]
C	4614	Renin-angiotensin	system	[PATH:ko04614]
D	lcl|SIZZ01000003.1_prot_TBR36394.1_3413;	K01322	PREP;	prolyl	oligopeptidase	[EC:3.4.21.26]
C	4925	Aldosterone	synthesis	and	secretion	[PATH:ko04925]
C	4927	Cortisol	synthesis	and	secretion	[PATH:ko04927]
B
B	9153	Circulatory	system
C	4260	Cardiac	muscle	contraction	[PATH:ko04260]
D	lcl|SIZZ01000001.1_prot_TBR40120.1_1587;	K00411	UQCRFS1,	RIP1,	petA;	ubiquinol-cytochrome	c	reductase	iron-sulfur	subunit	[EC:7.1.1.8]
D	lcl|SIZZ01000001.1_prot_TBR40119.1_1586;	K00412	CYTB,	petB;	ubiquinol-cytochrome	c	reductase	cytochrome	b	subunit
D	lcl|SIZZ01000001.1_prot_TBR40746.1_1585;	K00413	CYC1,	CYT1,	petC;	ubiquinol-cytochrome	c	reductase	cytochrome	c1	subunit
C	4261	Adrenergic	signaling	in	cardiomyocytes	[PATH:ko04261]
C	4270	Vascular	smooth	muscle	contraction	[PATH:ko04270]
B
B	9154	Digestive	system
C	4970	Salivary	secretion	[PATH:ko04970]
D	lcl|SIZZ01000002.1_prot_TBR37303.1_2467;	K01176	AMY,	amyA,	malS;	alpha-amylase	[EC:3.2.1.1]
D	lcl|SIZZ01000002.1_prot_TBR36738.1_2471;	K01176	AMY,	amyA,	malS;	alpha-amylase	[EC:3.2.1.1]
C	4971	Gastric	acid	secretion	[PATH:ko04971]
C	4972	Pancreatic	secretion	[PATH:ko04972]
D	lcl|SIZZ01000002.1_prot_TBR37303.1_2467;	K01176	AMY,	amyA,	malS;	alpha-amylase	[EC:3.2.1.1]
D	lcl|SIZZ01000002.1_prot_TBR36738.1_2471;	K01176	AMY,	amyA,	malS;	alpha-amylase	[EC:3.2.1.1]
C	4976	Bile	secretion	[PATH:ko04976]
C	4973	Carbohydrate	digestion	and	absorption	[PATH:ko04973]
D	lcl|SIZZ01000002.1_prot_TBR37303.1_2467;	K01176	AMY,	amyA,	malS;	alpha-amylase	[EC:3.2.1.1]
D	lcl|SIZZ01000002.1_prot_TBR36738.1_2471;	K01176	AMY,	amyA,	malS;	alpha-amylase	[EC:3.2.1.1]
C	4974	Protein	digestion	and	absorption	[PATH:ko04974]
D	lcl|SIZZ01000001.1_prot_TBR38927.1_271;	K14206	SLC15A1,	PEPT1;	solute	carrier	family	15	(oligopeptide	transporter),	member	1
D	lcl|SIZZ01000004.1_prot_TBR35883.1_3550;	K01278	DPP4,	CD26;	dipeptidyl-peptidase	4	[EC:3.4.14.5]
C	4975	Fat	digestion	and	absorption	[PATH:ko04975]
D	lcl|SIZZ01000001.1_prot_TBR39812.1_1251;	K00626	ACAT,	atoB;	acetyl-CoA	C-acetyltransferase	[EC:2.3.1.9]
D	lcl|SIZZ01000003.1_prot_TBR36102.1_3147;	K00626	ACAT,	atoB;	acetyl-CoA	C-acetyltransferase	[EC:2.3.1.9]
C	4979	Cholesterol	metabolism	[PATH:ko04979]
C	4977	Vitamin	digestion	and	absorption	[PATH:ko04977]
C	4978	Mineral	absorption	[PATH:ko04978]
D	lcl|SIZZ01000001.1_prot_TBR39074.1_434;	K17686	copA,	ctpA,	ATP7;	P-type	Cu+	transporter	[EC:7.2.2.8]
B
B	9155	Excretory	system
C	4962	Vasopressin-regulated	water	reabsorption	[PATH:ko04962]
C	4960	Aldosterone-regulated	sodium	reabsorption	[PATH:ko04960]
C	4961	Endocrine	and	other	factor-regulated	calcium	reabsorption	[PATH:ko04961]
C	4964	Proximal	tubule	bicarbonate	reclamation	[PATH:ko04964]
D	lcl|SIZZ01000001.1_prot_TBR40323.1_1811;	K01596	E4.1.1.32,	pckA,	PCK;	phosphoenolpyruvate	carboxykinase	(GTP)	[EC:4.1.1.32]
C	4966	Collecting	duct	acid	secretion	[PATH:ko04966]
B
B	9156	Nervous	system
C	4724	Glutamatergic	synapse	[PATH:ko04724]
D	lcl|SIZZ01000001.1_prot_TBR39874.1_1316;	K05617	SLC1A6,	EAAT4;	solute	carrier	family	1	(high	affinity	glutamate/aspartate	transporter),	member	6
D	lcl|SIZZ01000004.1_prot_TBR35804.1_3465;	K01915	glnA,	GLUL;	glutamine	synthetase	[EC:6.3.1.2]
C	4727	GABAergic	synapse	[PATH:ko04727]
D	lcl|SIZZ01000004.1_prot_TBR35804.1_3465;	K01915	glnA,	GLUL;	glutamine	synthetase	[EC:6.3.1.2]
C	4725	Cholinergic	synapse	[PATH:ko04725]
C	4728	Dopaminergic	synapse	[PATH:ko04728]
C	4726	Serotonergic	synapse	[PATH:ko04726]
C	4720	Long-term	potentiation	[PATH:ko04720]
C	4730	Long-term	depression	[PATH:ko04730]
C	4723	Retrograde	endocannabinoid	signaling	[PATH:ko04723]
D	lcl|SIZZ01000003.1_prot_TBR36249.1_3312;	K03953	NDUFA9;	NADH	dehydrogenase	(ubiquinone)	1	alpha	subcomplex	subunit	9
C	4721	Synaptic	vesicle	cycle	[PATH:ko04721]
D	lcl|SIZZ01000001.1_prot_TBR39874.1_1316;	K05617	SLC1A6,	EAAT4;	solute	carrier	family	1	(high	affinity	glutamate/aspartate	transporter),	member	6
C	4722	Neurotrophin	signaling	pathway	[PATH:ko04722]
B
B	9157	Sensory	system
C	4744	Phototransduction	[PATH:ko04744]
C	4745	Phototransduction	-	fly	[PATH:ko04745]
C	4740	Olfactory	transduction	[PATH:ko04740]
C	4742	Taste	transduction	[PATH:ko04742]
C	4750	Inflammatory	mediator	regulation	of	TRP	channels	[PATH:ko04750]
B
B	9158	Development	and	regeneration
C	4320	Dorso-ventral	axis	formation	[PATH:ko04320]
C	4360	Axon	guidance	[PATH:ko04360]
C	4361	Axon	regeneration	[PATH:ko04361]
D	lcl|SIZZ01000001.1_prot_TBR40161.1_1631;	K00901	dgkA,	DGK;	diacylglycerol	kinase	(ATP)	[EC:2.7.1.107]
C	4380	Osteoclast	differentiation	[PATH:ko04380]
B
B	9149	Aging
C	4211	Longevity	regulating	pathway	[PATH:ko04211]
D	lcl|SIZZ01000001.1_prot_TBR40111.1_1576;	K04564	SOD2;	superoxide	dismutase,	Fe-Mn	family	[EC:1.15.1.1]
C	4212	Longevity	regulating	pathway	-	worm	[PATH:ko04212]
D	lcl|SIZZ01000001.1_prot_TBR40111.1_1576;	K04564	SOD2;	superoxide	dismutase,	Fe-Mn	family	[EC:1.15.1.1]
D	lcl|SIZZ01000001.1_prot_TBR38980.1_331;	K00799	GST,	gst;	glutathione	S-transferase	[EC:2.5.1.18]
D	lcl|SIZZ01000001.1_prot_TBR39868.1_1308;	K00799	GST,	gst;	glutathione	S-transferase	[EC:2.5.1.18]
D	lcl|SIZZ01000001.1_prot_TBR39968.1_1415;	K00799	GST,	gst;	glutathione	S-transferase	[EC:2.5.1.18]
D	lcl|SIZZ01000001.1_prot_TBR40017.1_1469;	K00799	GST,	gst;	glutathione	S-transferase	[EC:2.5.1.18]
D	lcl|SIZZ01000001.1_prot_TBR40425.1_1924;	K00799	GST,	gst;	glutathione	S-transferase	[EC:2.5.1.18]
D	lcl|SIZZ01000002.1_prot_TBR36592.1_2304;	K00799	GST,	gst;	glutathione	S-transferase	[EC:2.5.1.18]
D	lcl|SIZZ01000002.1_prot_TBR36755.1_2489;	K00799	GST,	gst;	glutathione	S-transferase	[EC:2.5.1.18]
D	lcl|SIZZ01000004.1_prot_TBR35839.1_3502;	K00799	GST,	gst;	glutathione	S-transferase	[EC:2.5.1.18]
D	lcl|SIZZ01000002.1_prot_TBR36604.1_2317;	K00507	SCD,	desC;	stearoyl-CoA	desaturase	(Delta-9	desaturase)	[EC:1.14.19.1]
D	lcl|SIZZ01000001.1_prot_TBR39691.1_1117;	K01358	clpP,	CLPP;	ATP-dependent	Clp	protease,	protease	subunit	[EC:3.4.21.92]
D	lcl|SIZZ01000001.1_prot_TBR39287.1_670;	K04043	dnaK,	HSPA9;	molecular	chaperone	DnaK
D	lcl|SIZZ01000002.1_prot_TBR36772.1_2508;	K04077	groEL,	HSPD1;	chaperonin	GroEL
C	4213	Longevity	regulating	pathway	-	multiple	species	[PATH:ko04213]
D	lcl|SIZZ01000001.1_prot_TBR40111.1_1576;	K04564	SOD2;	superoxide	dismutase,	Fe-Mn	family	[EC:1.15.1.1]
D	lcl|SIZZ01000002.1_prot_TBR37038.1_2795;	K03695	clpB;	ATP-dependent	Clp	protease	ATP-binding	subunit	ClpB
B
B	9159	Environmental	adaptation
C	4710	Circadian	rhythm	[PATH:ko04710]
C	4713	Circadian	entrainment	[PATH:ko04713]
C	4711	Circadian	rhythm	-	fly	[PATH:ko04711]
C	4712	Circadian	rhythm	-	plant	[PATH:ko04712]
C	4714	Thermogenesis	[PATH:ko04714]
D	lcl|SIZZ01000001.1_prot_TBR39577.1_993;	K01897	ACSL,	fadD;	long-chain	acyl-CoA	synthetase	[EC:6.2.1.3]
D	lcl|SIZZ01000003.1_prot_TBR36249.1_3312;	K03953	NDUFA9;	NADH	dehydrogenase	(ubiquinone)	1	alpha	subcomplex	subunit	9
D	lcl|SIZZ01000001.1_prot_TBR40120.1_1587;	K00411	UQCRFS1,	RIP1,	petA;	ubiquinol-cytochrome	c	reductase	iron-sulfur	subunit	[EC:7.1.1.8]
D	lcl|SIZZ01000001.1_prot_TBR40119.1_1586;	K00412	CYTB,	petB;	ubiquinol-cytochrome	c	reductase	cytochrome	b	subunit
D	lcl|SIZZ01000001.1_prot_TBR40746.1_1585;	K00413	CYC1,	CYT1,	petC;	ubiquinol-cytochrome	c	reductase	cytochrome	c1	subunit
D	lcl|SIZZ01000002.1_prot_TBR36672.1_2393;	K02257	COX10,	ctaB,	cyoE;	heme	o	synthase	[EC:2.5.1.141]
D	lcl|SIZZ01000002.1_prot_TBR36671.1_2392;	K02259	COX15,	ctaA;	heme	a	synthase	[EC:1.17.99.9]
C	4626	Plant-pathogen	interaction	[PATH:ko04626]
D	lcl|SIZZ01000002.1_prot_TBR37191.1_2959;	K02406	fliC,	hag;	flagellin
D	lcl|SIZZ01000007.1_prot_TBR35750.1_3675;	K02358	tuf,	TUFM;	elongation	factor	Tu
D	lcl|SIZZ01000001.1_prot_TBR40791.1_2138;	K00864	glpK,	GK;	glycerol	kinase	[EC:2.7.1.30]
D	lcl|SIZZ01000001.1_prot_TBR38976.1_326;	K04079	HSP90A,	htpG;	molecular	chaperone	HtpG
D	lcl|SIZZ01000003.1_prot_TBR36327.1_3400;	K12340	tolC,	bepC,	cyaE,	raxC,	sapF,	rsaF,	hasF;	outer	membrane	protein

## Sheet: Level 1- Cellular Processes
Level 1 KEGG Annotations for Cellular Processes
A09140	Cellular	Processes
B
B	9141	Transport	and	catabolism
C	4144	Endocytosis	[PATH:ko04144]
C	4145	Phagosome	[PATH:ko04145]
C	4142	Lysosome	[PATH:ko04142]
D	lcl|SIZZ01000001.1_prot_TBR40713.1_1168;	K01217	IDUA;	L-iduronidase	[EC:3.2.1.76]
D	lcl|SIZZ01000003.1_prot_TBR36374.1_3178;	K12373	HEXA_B;	hexosaminidase	[EC:3.2.1.52]
D	lcl|SIZZ01000001.1_prot_TBR39650.1_1073;	K01444	AGA,	aspG;	N4-(beta-N-acetylglucosaminyl)-L-asparaginase	[EC:3.5.1.26]
C	4146	Peroxisome	[PATH:ko04146]
D	lcl|SIZZ01000001.1_prot_TBR39577.1_993;	K01897	ACSL,	fadD;	long-chain	acyl-CoA	synthetase	[EC:6.2.1.3]
D	lcl|SIZZ01000002.1_prot_TBR36523.1_2230;	K03426	E3.6.1.22,	NUDT12,	nudC;	NAD+	diphosphatase	[EC:3.6.1.22]
D	lcl|SIZZ01000003.1_prot_TBR36213.1_3275;	K00031	IDH1,	IDH2,	icd;	isocitrate	dehydrogenase	[EC:1.1.1.42]
D	lcl|SIZZ01000001.1_prot_TBR39823.1_1263;	K01640	HMGCL,	hmgL;	hydroxymethylglutaryl-CoA	lyase	[EC:4.1.3.4]
D	lcl|SIZZ01000001.1_prot_TBR40111.1_1576;	K04564	SOD2;	superoxide	dismutase,	Fe-Mn	family	[EC:1.15.1.1]
C	4140	Autophagy	-	animal	[PATH:ko04140]
C	4138	Autophagy	-	yeast	[PATH:ko04138]
C	4136	Autophagy	-	other	[PATH:ko04136]
C	4137	Mitophagy	-	animal	[PATH:ko04137]
C	4139	Mitophagy	-	yeast	[PATH:ko04139]
B
B	9143	Cell	growth	and	death
C	4110	Cell	cycle	[PATH:ko04110]
C	4111	Cell	cycle	-	yeast	[PATH:ko04111]
C	4112	Cell	cycle	-	Caulobacter	[PATH:ko04112]
D	lcl|SIZZ01000004.1_prot_TBR35872.1_3539;	K02313	dnaA;	chromosomal	replication	initiator	protein
D	lcl|SIZZ01000001.1_prot_TBR39936.1_1382;	K02314	dnaB;	replicative	DNA	helicase	[EC:5.6.2.3]
D	lcl|SIZZ01000001.1_prot_TBR39689.1_1115;	K01338	lon;	ATP-dependent	Lon	protease	[EC:3.4.21.53]
D	lcl|SIZZ01000002.1_prot_TBR36985.1_2740;	K03531	ftsZ;	cell	division	protein	FtsZ
D	lcl|SIZZ01000002.1_prot_TBR36983.1_2738;	K03589	ftsQ;	cell	division	protein	FtsQ
D	lcl|SIZZ01000002.1_prot_TBR36984.1_2739;	K03590	ftsA;	cell	division	protein	FtsA
D	lcl|SIZZ01000002.1_prot_TBR36979.1_2734;	K03588	ftsW,	spoVE;	cell	division	protein	FtsW
D	lcl|SIZZ01000002.1_prot_TBR36980.1_2735;	K02563	murG;	UDP-N-acetylglucosamine--N-acetylmuramyl-(pentapeptide)	pyrophosphoryl-undecaprenol	N-acetylglucosamine	transferase	[EC:2.4.1.227]
D	lcl|SIZZ01000001.1_prot_TBR38756.1_82;	K11749	rseP;	regulator	of	sigma	E	protease	[EC:3.4.24.-]
D	lcl|SIZZ01000001.1_prot_TBR39690.1_1116;	K03544	clpX,	CLPX;	ATP-dependent	Clp	protease	ATP-binding	subunit	ClpX
D	lcl|SIZZ01000001.1_prot_TBR39691.1_1117;	K01358	clpP,	CLPP;	ATP-dependent	Clp	protease,	protease	subunit	[EC:3.4.21.92]
D	lcl|SIZZ01000001.1_prot_TBR40100.1_1563;	K02488	pleD;	two-component	system,	cell	cycle	response	regulator	[EC:2.7.7.65]
C	4113	Meiosis	-	yeast	[PATH:ko04113]
D	lcl|SIZZ01000001.1_prot_TBR39076.1_436;	K08139	HXT;	MFS	transporter,	SP	family,	sugar:H+	symporter
C	4114	Oocyte	meiosis	[PATH:ko04114]
C	4210	Apoptosis	[PATH:ko04210]
D	lcl|SIZZ01000001.1_prot_TBR40690.1_884;	K08738	CYC;	cytochrome	c
C	4214	Apoptosis	-	fly	[PATH:ko04214]
D	lcl|SIZZ01000001.1_prot_TBR40690.1_884;	K08738	CYC;	cytochrome	c
C	4215	Apoptosis	-	multiple	species	[PATH:ko04215]
D	lcl|SIZZ01000001.1_prot_TBR40690.1_884;	K08738	CYC;	cytochrome	c
C	4216	Ferroptosis	[PATH:ko04216]
D	lcl|SIZZ01000001.1_prot_TBR39577.1_993;	K01897	ACSL,	fadD;	long-chain	acyl-CoA	synthetase	[EC:6.2.1.3]
D	lcl|SIZZ01000004.1_prot_TBR35781.1_3440;	K00657	speG,	SAT;	diamine	N-acetyltransferase	[EC:2.3.1.57]
C	4217	Necroptosis	[PATH:ko04217]
D	lcl|SIZZ01000004.1_prot_TBR35804.1_3465;	K01915	glnA,	GLUL;	glutamine	synthetase	[EC:6.3.1.2]
D	lcl|SIZZ01000001.1_prot_TBR38976.1_326;	K04079	HSP90A,	htpG;	molecular	chaperone	HtpG
D	lcl|SIZZ01000001.1_prot_TBR38990.1_342;	K03767	PPIA;	peptidyl-prolyl	cis-trans	isomerase	A	(cyclophilin	A)	[EC:5.2.1.8]
C	4115	p53	signaling	pathway	[PATH:ko04115]
D	lcl|SIZZ01000001.1_prot_TBR40690.1_884;	K08738	CYC;	cytochrome	c
C	4218	Cellular	senescence	[PATH:ko04218]
B
B	9144	Cellular	community	-	eukaryotes
C	4510	Focal	adhesion	[PATH:ko04510]
C	4520	Adherens	junction	[PATH:ko04520]
C	4530	Tight	junction	[PATH:ko04530]
C	4540	Gap	junction	[PATH:ko04540]
C	4550	Signaling	pathways	regulating	pluripotency	of	stem	cells	[PATH:ko04550]
B
B	9145	Cellular	community	-	prokaryotes
C	2024	Quorum	sensing	[PATH:ko02024]
D	lcl|SIZZ01000001.1_prot_TBR38833.1_167;	K03666	hfq;	host	factor-I	protein
D	lcl|SIZZ01000002.1_prot_TBR36819.1_2560;	K01657	trpE;	anthranilate	synthase	component	I	[EC:4.1.3.27]
D	lcl|SIZZ01000002.1_prot_TBR36835.1_2578;	K01658	trpG;	anthranilate	synthase	component	II	[EC:4.1.3.27]
D	lcl|SIZZ01000001.1_prot_TBR38705.1_30;	K01626	E2.5.1.54,	aroF,	aroG,	aroH;	3-deoxy-7-phosphoheptulonate	synthase	[EC:2.5.1.54]
D	lcl|SIZZ01000001.1_prot_TBR38941.1_286;	K01626	E2.5.1.54,	aroF,	aroG,	aroH;	3-deoxy-7-phosphoheptulonate	synthase	[EC:2.5.1.54]
D	lcl|SIZZ01000004.1_prot_TBR35931.1_3598;	K06998	phzF;	trans-2,3-dihydro-3-hydroxyanthranilate	isomerase	[EC:5.3.3.17]
D	lcl|SIZZ01000001.1_prot_TBR39741.1_1172;	K07645	qseC;	two-component	system,	OmpR	family,	sensor	histidine	kinase	QseC	[EC:2.7.13.3]
D	lcl|SIZZ01000003.1_prot_TBR36194.1_3253;	K07645	qseC;	two-component	system,	OmpR	family,	sensor	histidine	kinase	QseC	[EC:2.7.13.3]
D	lcl|SIZZ01000001.1_prot_TBR39740.1_1171;	K07666	qseB;	two-component	system,	OmpR	family,	response	regulator	QseB
D	lcl|SIZZ01000003.1_prot_TBR36263.1_3328;	K07666	qseB;	two-component	system,	OmpR	family,	response	regulator	QseB
D	lcl|SIZZ01000002.1_prot_TBR36617.1_2332;	K07667	kdpE;	two-component	system,	OmpR	family,	KDP	operon	response	regulator	KdpE
D	lcl|SIZZ01000002.1_prot_TBR36908.1_2657;	K20527	trbB;	type	IV	secretion	system	protein	TrbB	[EC:7.4.2.8]
D	lcl|SIZZ01000002.1_prot_TBR37320.1_2660;	K20530	trbE;	type	IV	secretion	system	protein	TrbE	[EC:7.4.2.8]
D	lcl|SIZZ01000002.1_prot_TBR36911.1_2661;	K20531	trbF;	type	IV	secretion	system	protein	TrbF
D	lcl|SIZZ01000002.1_prot_TBR36912.1_2662;	K20532	trbG;	type	IV	secretion	system	protein	TrbG
D	lcl|SIZZ01000002.1_prot_TBR36914.1_2664;	K20533	trbI;	type	IV	secretion	system	protein	TrbI
D	lcl|SIZZ01000002.1_prot_TBR37250.1_3024;	K20276	bapA;	large	repetitive	protein
D	lcl|SIZZ01000001.1_prot_TBR39577.1_993;	K01897	ACSL,	fadD;	long-chain	acyl-CoA	synthetase	[EC:6.2.1.3]
D	lcl|SIZZ01000001.1_prot_TBR40265.1_1747;	K10914	crp;	CRP/FNR	family	transcriptional	regulator,	cyclic	AMP	receptor	protein
D	lcl|SIZZ01000002.1_prot_TBR36841.1_2584;	K10914	crp;	CRP/FNR	family	transcriptional	regulator,	cyclic	AMP	receptor	protein
D	lcl|SIZZ01000001.1_prot_TBR38897.1_239;	K09823	zur;	Fur	family	transcriptional	regulator,	zinc	uptake	regulator
D	lcl|SIZZ01000001.1_prot_TBR40760.1_1735;	K11752	ribD;	diaminohydroxyphosphoribosylaminopyrimidine	deaminase	/	5-amino-6-(5-phosphoribosylamino)uracil	reductase	[EC:3.5.4.26	1.1.1.193]
D	lcl|SIZZ01000001.1_prot_TBR40294.1_1780;	K18139	oprM,	emhC,	ttgC,	cusC,	adeK,	smeF,	mtrE,	cmeC,	gesC;	outer	membrane	protein,	multidrug	efflux	system
D	lcl|SIZZ01000004.1_prot_TBR35875.1_3542;	K03217	yidC,	spoIIIJ,	OXA1,	ccfA;	YidC/Oxa1	family	membrane	protein	insertase
D	lcl|SIZZ01000003.1_prot_TBR36183.1_3241;	K15654	srfAA,	lchAA;	surfactin	family	lipopeptide	synthetase	A
D	lcl|SIZZ01000001.1_prot_TBR39598.1_1018;	K03075	secG;	preprotein	translocase	subunit	SecG
D	lcl|SIZZ01000001.1_prot_TBR38698.1_23;	K03076	secY;	preprotein	translocase	subunit	SecY
D	lcl|SIZZ01000001.1_prot_TBR40738.1_1517;	K03210	yajC;	preprotein	translocase	subunit	YajC
D	lcl|SIZZ01000002.1_prot_TBR36989.1_2744;	K03070	secA;	preprotein	translocase	subunit	SecA	[EC:7.4.2.8]
D	lcl|SIZZ01000002.1_prot_TBR37162.1_2930;	K03110	ftsY;	fused	signal	recognition	particle	receptor
D	lcl|SIZZ01000002.1_prot_TBR36611.1_2325;	K03071	secB;	preprotein	translocase	subunit	SecB
D	lcl|SIZZ01000001.1_prot_TBR39931.1_1377;	K03106	SRP54,	ffh;	signal	recognition	particle	subunit	SRP54	[EC:3.6.5.4]
C	5111	Biofilm	formation	-	Vibrio	cholerae	[PATH:ko05111]
D	lcl|SIZZ01000001.1_prot_TBR38833.1_167;	K03666	hfq;	host	factor-I	protein
D	lcl|SIZZ01000003.1_prot_TBR36179.1_3237;	K01912	paaK;	phenylacetate-CoA	ligase	[EC:6.2.1.30]
D	lcl|SIZZ01000002.1_prot_TBR36643.1_2360;	K02453	gspD;	general	secretion	pathway	protein	D
D	lcl|SIZZ01000002.1_prot_TBR36635.1_2350;	K02454	gspE;	general	secretion	pathway	protein	E	[EC:7.4.2.8]
D	lcl|SIZZ01000003.1_prot_TBR36019.1_3054;	K02454	gspE;	general	secretion	pathway	protein	E	[EC:7.4.2.8]
D	lcl|SIZZ01000002.1_prot_TBR36636.1_2351;	K02455	gspF;	general	secretion	pathway	protein	F
D	lcl|SIZZ01000002.1_prot_TBR36637.1_2352;	K02456	gspG;	general	secretion	pathway	protein	G
D	lcl|SIZZ01000001.1_prot_TBR39558.1_972;	K07689	uvrY,	gacA,	varA;	two-component	system,	NarL	family,	invasion	response	regulator	UvrY
D	lcl|SIZZ01000001.1_prot_TBR38986.1_337;	K03563	csrA;	carbon	storage	regulator
D	lcl|SIZZ01000001.1_prot_TBR40265.1_1747;	K10914	crp;	CRP/FNR	family	transcriptional	regulator,	cyclic	AMP	receptor	protein
D	lcl|SIZZ01000002.1_prot_TBR36841.1_2584;	K10914	crp;	CRP/FNR	family	transcriptional	regulator,	cyclic	AMP	receptor	protein
D	lcl|SIZZ01000002.1_prot_TBR36759.1_2494;	K03557	fis;	Fis	family	transcriptional	regulator,	factor	for	inversion	stimulation	protein
D	lcl|SIZZ01000002.1_prot_TBR37196.1_2964;	K10941	flrA,	fleQ,	flaK;	sigma-54	dependent	transcriptional	regulator,	flagellar	regulatory	protein
D	lcl|SIZZ01000002.1_prot_TBR37130.1_2897;	K03092	rpoN;	RNA	polymerase	sigma-54	factor
D	lcl|SIZZ01000002.1_prot_TBR37212.1_2983;	K02405	fliA,	whiG;	RNA	polymerase	sigma	factor	FliA
C	2025	Biofilm	formation	-	Pseudomonas	aeruginosa	[PATH:ko02025]
D	lcl|SIZZ01000001.1_prot_TBR40188.1_1661;	K02660	pilJ;	twitching	motility	protein	PilJ
D	lcl|SIZZ01000001.1_prot_TBR40753.1_1662;	K02659	pilI;	twitching	motility	protein	PilI
D	lcl|SIZZ01000001.1_prot_TBR40187.1_1660;	K06596	chpA;	chemosensory	pili	system	protein	ChpA	(sensor	histidine	kinase/response	regulator)
D	lcl|SIZZ01000001.1_prot_TBR40185.1_1658;	K06598	chpC;	chemosensory	pili	system	protein	ChpC
D	lcl|SIZZ01000001.1_prot_TBR39229.1_601;	K02658	pilH;	twitching	motility	two-component	system	response	regulator	PilH
D	lcl|SIZZ01000001.1_prot_TBR40189.1_1663;	K02658	pilH;	twitching	motility	two-component	system	response	regulator	PilH
D	lcl|SIZZ01000001.1_prot_TBR40754.1_1664;	K02657	pilG;	twitching	motility	two-component	system	response	regulator	PilG
D	lcl|SIZZ01000001.1_prot_TBR40265.1_1747;	K10914	crp;	CRP/FNR	family	transcriptional	regulator,	cyclic	AMP	receptor	protein
D	lcl|SIZZ01000002.1_prot_TBR36841.1_2584;	K10914	crp;	CRP/FNR	family	transcriptional	regulator,	cyclic	AMP	receptor	protein
D	lcl|SIZZ01000002.1_prot_TBR37196.1_2964;	K10941	flrA,	fleQ,	flaK;	sigma-54	dependent	transcriptional	regulator,	flagellar	regulatory	protein
D	lcl|SIZZ01000002.1_prot_TBR36819.1_2560;	K01657	trpE;	anthranilate	synthase	component	I	[EC:4.1.3.27]
D	lcl|SIZZ01000002.1_prot_TBR36835.1_2578;	K01658	trpG;	anthranilate	synthase	component	II	[EC:4.1.3.27]
D	lcl|SIZZ01000001.1_prot_TBR39558.1_972;	K07689	uvrY,	gacA,	varA;	two-component	system,	NarL	family,	invasion	response	regulator	UvrY
D	lcl|SIZZ01000001.1_prot_TBR38986.1_337;	K03563	csrA;	carbon	storage	regulator
D	lcl|SIZZ01000002.1_prot_TBR37233.1_3005;	K20978	hsbA;	HptB-dependent	secretion	and	biofilm	anti	anti-sigma	factor
D	lcl|SIZZ01000002.1_prot_TBR37212.1_2983;	K02405	fliA,	whiG;	RNA	polymerase	sigma	factor	FliA
D	lcl|SIZZ01000001.1_prot_TBR39725.1_1153;	K11444	wspR;	two-component	system,	chemotaxis	family,	response	regulator	WspR	[EC:2.7.7.65]
D	lcl|SIZZ01000003.1_prot_TBR36187.1_3246;	K20997	pslA;	polysaccharide	biosynthesis	protein	PslA
D	lcl|SIZZ01000001.1_prot_TBR40371.1_1862;	K16011	algA,	xanB,	rfbA,	wbpW,	pslB;	mannose-1-phosphate	guanylyltransferase	/	mannose-6-phosphate	isomerase	[EC:2.7.7.13	5.3.1.8]
D	lcl|SIZZ01000001.1_prot_TBR39441.1_843;	K19291	alg44;	mannuronan	synthase	[EC:2.4.1.33]
D	lcl|SIZZ01000001.1_prot_TBR40727.1_1372;	K21025	fimX;	multidomain	signaling	protein	FimX
C	2026	Biofilm	formation	-	Escherichia	coli	[PATH:ko02026]
D	lcl|SIZZ01000001.1_prot_TBR40265.1_1747;	K10914	crp;	CRP/FNR	family	transcriptional	regulator,	cyclic	AMP	receptor	protein
D	lcl|SIZZ01000002.1_prot_TBR36841.1_2584;	K10914	crp;	CRP/FNR	family	transcriptional	regulator,	cyclic	AMP	receptor	protein
D	lcl|SIZZ01000002.1_prot_TBR37212.1_2983;	K02405	fliA,	whiG;	RNA	polymerase	sigma	factor	FliA
D	lcl|SIZZ01000001.1_prot_TBR40725.1_1360;	K06204	dksA;	DnaK	suppressor	protein
D	lcl|SIZZ01000001.1_prot_TBR39358.1_746;	K21085	yedQ;	diguanylate	cyclase	[EC:2.7.7.65]
D	lcl|SIZZ01000002.1_prot_TBR37075.1_2838;	K18968	adrA;	diguanylate	cyclase	[EC:2.7.7.65]
D	lcl|SIZZ01000001.1_prot_TBR39355.1_743;	K00694	bcsA;	cellulose	synthase	(UDP-forming)	[EC:2.4.1.12]
D	lcl|SIZZ01000003.1_prot_TBR36139.1_3194;	K01991	wza,	gfcE;	polysaccharide	biosynthesis/export	protein
D	lcl|SIZZ01000001.1_prot_TBR40390.1_1886;	K12687	flu;	antigen	43
D	lcl|SIZZ01000001.1_prot_TBR40391.1_1887;	K12687	flu;	antigen	43
D	lcl|SIZZ01000001.1_prot_TBR39558.1_972;	K07689	uvrY,	gacA,	varA;	two-component	system,	NarL	family,	invasion	response	regulator	UvrY
D	lcl|SIZZ01000001.1_prot_TBR38986.1_337;	K03563	csrA;	carbon	storage	regulator
D	lcl|SIZZ01000003.1_prot_TBR36182.1_3240;	K11936	pgaC,	icaA;	poly-beta-1,6-N-acetyl-D-glucosamine	synthase	[EC:2.4.1.-]
D	lcl|SIZZ01000002.1_prot_TBR37079.1_2842;	K04761	oxyR;	LysR	family	transcriptional	regulator,	hydrogen	peroxide-inducible	genes	activator
D	lcl|SIZZ01000001.1_prot_TBR40292.1_1778;	K07648	arcB;	two-component	system,	OmpR	family,	aerobic	respiration	control	sensor	histidine	kinase	ArcB	[EC:2.7.13.3]
D	lcl|SIZZ01000001.1_prot_TBR39042.1_398;	K07687	rcsB;	two-component	system,	NarL	family,	captular	synthesis	response	regulator	RcsB
D	lcl|SIZZ01000001.1_prot_TBR40493.1_1998;	K07687	rcsB;	two-component	system,	NarL	family,	captular	synthesis	response	regulator	RcsB
D	lcl|SIZZ01000002.1_prot_TBR36630.1_2345;	K03566	gcvA;	LysR	family	transcriptional	regulator,	glycine	cleavage	system	transcriptional	activator
D	lcl|SIZZ01000001.1_prot_TBR40651.1_357;	K03567	gcvR;	glycine	cleavage	system	transcriptional	repressor
B
B	9142	Cell	motility
C	2030	Bacterial	chemotaxis	[PATH:ko02030]
D	lcl|SIZZ01000001.1_prot_TBR40075.1_1534;	K03406	mcp;	methyl-accepting	chemotaxis	protein
D	lcl|SIZZ01000002.1_prot_TBR37227.1_2998;	K03406	mcp;	methyl-accepting	chemotaxis	protein
D	lcl|SIZZ01000002.1_prot_TBR37229.1_3000;	K03406	mcp;	methyl-accepting	chemotaxis	protein
D	lcl|SIZZ01000002.1_prot_TBR37232.1_3004;	K03406	mcp;	methyl-accepting	chemotaxis	protein
D	lcl|SIZZ01000002.1_prot_TBR37215.1_2986;	K03407	cheA;	two-component	system,	chemotaxis	family,	sensor	kinase	CheA	[EC:2.7.13.3]
D	lcl|SIZZ01000002.1_prot_TBR37226.1_2997;	K03407	cheA;	two-component	system,	chemotaxis	family,	sensor	kinase	CheA	[EC:2.7.13.3]
D	lcl|SIZZ01000002.1_prot_TBR37218.1_2989;	K03408	cheW;	purine-binding	chemotaxis	protein	CheW
D	lcl|SIZZ01000002.1_prot_TBR37228.1_2999;	K03408	cheW;	purine-binding	chemotaxis	protein	CheW
D	lcl|SIZZ01000002.1_prot_TBR37213.1_2984;	K03413	cheY;	two-component	system,	chemotaxis	family,	chemotaxis	protein	CheY
D	lcl|SIZZ01000002.1_prot_TBR37225.1_2996;	K03413	cheY;	two-component	system,	chemotaxis	family,	chemotaxis	protein	CheY
D	lcl|SIZZ01000002.1_prot_TBR37214.1_2985;	K03414	cheZ;	chemotaxis	protein	CheZ
D	lcl|SIZZ01000002.1_prot_TBR37231.1_3003;	K03412	cheB;	two-component	system,	chemotaxis	family,	protein-glutamate	methylesterase/glutaminase	[EC:3.1.1.61	3.5.1.44]
D	lcl|SIZZ01000001.1_prot_TBR40077.1_1536;	K03411	cheD;	chemotaxis	protein	CheD	[EC:3.5.1.44]
D	lcl|SIZZ01000002.1_prot_TBR37341.1_3002;	K03411	cheD;	chemotaxis	protein	CheD	[EC:3.5.1.44]
D	lcl|SIZZ01000001.1_prot_TBR40316.1_1804;	K00575	cheR;	chemotaxis	protein	methyltransferase	CheR	[EC:2.1.1.80]
D	lcl|SIZZ01000002.1_prot_TBR37230.1_3001;	K00575	cheR;	chemotaxis	protein	methyltransferase	CheR	[EC:2.1.1.80]
D	lcl|SIZZ01000002.1_prot_TBR37199.1_2967;	K02410	fliG;	flagellar	motor	switch	protein	FliG
D	lcl|SIZZ01000002.1_prot_TBR37204.1_2973;	K02416	fliM;	flagellar	motor	switch	protein	FliM
D	lcl|SIZZ01000002.1_prot_TBR37205.1_2974;	K02417	fliN;	flagellar	motor	switch	protein	FliN
D	lcl|SIZZ01000002.1_prot_TBR37216.1_2987;	K02556	motA;	chemotaxis	protein	MotA
D	lcl|SIZZ01000002.1_prot_TBR37217.1_2988;	K02557	motB;	chemotaxis	protein	MotB
C	2040	Flagellar	assembly	[PATH:ko02040]
D	lcl|SIZZ01000002.1_prot_TBR37197.1_2965;	K02408	fliE;	flagellar	hook-basal	body	complex	protein	FliE
D	lcl|SIZZ01000002.1_prot_TBR37198.1_2966;	K02409	fliF;	flagellar	M-ring	protein	FliF
D	lcl|SIZZ01000002.1_prot_TBR37199.1_2967;	K02410	fliG;	flagellar	motor	switch	protein	FliG
D	lcl|SIZZ01000002.1_prot_TBR37338.1_2968;	K02411	fliH;	flagellar	assembly	protein	FliH
D	lcl|SIZZ01000002.1_prot_TBR37200.1_2969;	K02412	fliI;	flagellum-specific	ATP	synthase	[EC:7.4.2.8]
D	lcl|SIZZ01000002.1_prot_TBR37201.1_2970;	K02413	fliJ;	flagellar	protein	FliJ
D	lcl|SIZZ01000002.1_prot_TBR37203.1_2972;	K02415	fliL;	flagellar	protein	FliL
D	lcl|SIZZ01000002.1_prot_TBR37204.1_2973;	K02416	fliM;	flagellar	motor	switch	protein	FliM
D	lcl|SIZZ01000002.1_prot_TBR37205.1_2974;	K02417	fliN;	flagellar	motor	switch	protein	FliN
D	lcl|SIZZ01000002.1_prot_TBR37207.1_2976;	K02419	fliP;	flagellar	biosynthesis	protein	FliP
D	lcl|SIZZ01000002.1_prot_TBR37208.1_2977;	K02420	fliQ;	flagellar	biosynthesis	protein	FliQ
D	lcl|SIZZ01000002.1_prot_TBR37339.1_2978;	K02421	fliR;	flagellar	biosynthesis	protein	FliR
D	lcl|SIZZ01000002.1_prot_TBR37210.1_2980;	K02400	flhA;	flagellar	biosynthesis	protein	FlhA
D	lcl|SIZZ01000002.1_prot_TBR37209.1_2979;	K02401	flhB;	flagellar	biosynthesis	protein	FlhB
D	lcl|SIZZ01000002.1_prot_TBR37178.1_2946;	K02386	flgA;	flagellar	basal	body	P-ring	formation	protein	FlgA
D	lcl|SIZZ01000002.1_prot_TBR37180.1_2948;	K02387	flgB;	flagellar	basal-body	rod	protein	FlgB
D	lcl|SIZZ01000002.1_prot_TBR37181.1_2949;	K02388	flgC;	flagellar	basal-body	rod	protein	FlgC
D	lcl|SIZZ01000002.1_prot_TBR37182.1_2950;	K02389	flgD;	flagellar	basal-body	rod	modification	protein	FlgD
D	lcl|SIZZ01000002.1_prot_TBR37183.1_2951;	K02390	flgE;	flagellar	hook	protein	FlgE
D	lcl|SIZZ01000002.1_prot_TBR37184.1_2952;	K02391	flgF;	flagellar	basal-body	rod	protein	FlgF
D	lcl|SIZZ01000002.1_prot_TBR37185.1_2953;	K02392	flgG;	flagellar	basal-body	rod	protein	FlgG
D	lcl|SIZZ01000002.1_prot_TBR37186.1_2954;	K02393	flgH;	flagellar	L-ring	protein	FlgH
D	lcl|SIZZ01000002.1_prot_TBR37187.1_2955;	K02394	flgI;	flagellar	P-ring	protein	FlgI
D	lcl|SIZZ01000002.1_prot_TBR37188.1_2956;	K02395	flgJ;	peptidoglycan	hydrolase	FlgJ
D	lcl|SIZZ01000002.1_prot_TBR37189.1_2957;	K02396	flgK;	flagellar	hook-associated	protein	1
D	lcl|SIZZ01000002.1_prot_TBR37190.1_2958;	K02397	flgL;	flagellar	hook-associated	protein	3	FlgL
D	lcl|SIZZ01000002.1_prot_TBR37191.1_2959;	K02406	fliC,	hag;	flagellin
D	lcl|SIZZ01000002.1_prot_TBR37192.1_2960;	K02407	fliD;	flagellar	hook-associated	protein	2
D	lcl|SIZZ01000002.1_prot_TBR37193.1_2961;	K02422	fliS;	flagellar	secretion	chaperone	FliS
D	lcl|SIZZ01000002.1_prot_TBR37216.1_2987;	K02556	motA;	chemotaxis	protein	MotA
D	lcl|SIZZ01000002.1_prot_TBR37217.1_2988;	K02557	motB;	chemotaxis	protein	MotB
D	lcl|SIZZ01000002.1_prot_TBR36497.1_2204;	K03086	rpoD;	RNA	polymerase	primary	sigma	factor
D	lcl|SIZZ01000002.1_prot_TBR37196.1_2964;	K10941	flrA,	fleQ,	flaK;	sigma-54	dependent	transcriptional	regulator,	flagellar	regulatory	protein
D	lcl|SIZZ01000002.1_prot_TBR37130.1_2897;	K03092	rpoN;	RNA	polymerase	sigma-54	factor
D	lcl|SIZZ01000002.1_prot_TBR37212.1_2983;	K02405	fliA,	whiG;	RNA	polymerase	sigma	factor	FliA
C	4810	Regulation	of	actin	cytoskeleton	[PATH:ko04810]

## Sheet: Level 1-BRITE Hierarchies
Level 1 KEGG Annotations for BRITE Hierarchies
A09180	Brite	Hierarchies
B
B	9181	Protein	families:	metabolism
C	1000	Enzymes	[BR:ko01000]
C	1001	Protein	kinases	[BR:ko01001]
D	lcl|SIZZ01000002.1_prot_TBR36942.1_2694;	K12132	prkC,	stkP;	eukaryotic-like	serine/threonine-protein	kinase	[EC:2.7.11.1]
D	lcl|SIZZ01000003.1_prot_TBR36141.1_3196;	K00903	epsB,	capB;	protein-tyrosine	kinase	[EC:2.7.10.3]
D	lcl|SIZZ01000001.1_prot_TBR38993.1_345;	K07636	phoR;	two-component	system,	OmpR	family,	phosphate	regulon	sensor	histidine	kinase	PhoR	[EC:2.7.13.3]
D	lcl|SIZZ01000001.1_prot_TBR40472.1_1973;	K07637	phoQ;	two-component	system,	OmpR	family,	sensor	histidine	kinase	PhoQ	[EC:2.7.13.3]
D	lcl|SIZZ01000001.1_prot_TBR39741.1_1172;	K07645	qseC;	two-component	system,	OmpR	family,	sensor	histidine	kinase	QseC	[EC:2.7.13.3]
D	lcl|SIZZ01000003.1_prot_TBR36194.1_3253;	K07645	qseC;	two-component	system,	OmpR	family,	sensor	histidine	kinase	QseC	[EC:2.7.13.3]
D	lcl|SIZZ01000002.1_prot_TBR36618.1_2333;	K07646	kdpD;	two-component	system,	OmpR	family,	sensor	histidine	kinase	KdpD	[EC:2.7.13.3]
D	lcl|SIZZ01000001.1_prot_TBR40292.1_1778;	K07648	arcB;	two-component	system,	OmpR	family,	aerobic	respiration	control	sensor	histidine	kinase	ArcB	[EC:2.7.13.3]
D	lcl|SIZZ01000001.1_prot_TBR40034.1_1487;	K07649	tctE;	two-component	system,	OmpR	family,	sensor	histidine	kinase	TctE	[EC:2.7.13.3]
D	lcl|SIZZ01000003.1_prot_TBR36262.1_3327;	K07649	tctE;	two-component	system,	OmpR	family,	sensor	histidine	kinase	TctE	[EC:2.7.13.3]
D	lcl|SIZZ01000001.1_prot_TBR38912.1_254;	K02484	K02484;	two-component	system,	OmpR	family,	sensor	kinase	[EC:2.7.13.3]
D	lcl|SIZZ01000001.1_prot_TBR40674.1_665;	K07675	uhpB;	two-component	system,	NarL	family,	sensor	histidine	kinase	UhpB	[EC:2.7.13.3]
D	lcl|SIZZ01000001.1_prot_TBR40491.1_1996;	K07679	evgS,	bvgS;	two-component	system,	NarL	family,	sensor	histidine	kinase	EvgS	[EC:2.7.13.3]
D	lcl|SIZZ01000001.1_prot_TBR39516.1_926;	K07777	degS;	two-component	system,	NarL	family,	sensor	histidine	kinase	DegS	[EC:2.7.13.3]
D	lcl|SIZZ01000001.1_prot_TBR40065.1_1523;	K07778	desK;	two-component	system,	NarL	family,	sensor	histidine	kinase	DesK	[EC:2.7.13.3]
D	lcl|SIZZ01000001.1_prot_TBR40066.1_1524;	K07778	desK;	two-component	system,	NarL	family,	sensor	histidine	kinase	DesK	[EC:2.7.13.3]
D	lcl|SIZZ01000001.1_prot_TBR40481.1_1984;	K07704	lytS;	two-component	system,	LytTR	family,	sensor	histidine	kinase	LytS	[EC:2.7.13.3]
D	lcl|SIZZ01000004.1_prot_TBR35926.1_3593;	K08082	algZ;	two-component	system,	LytTR	family,	sensor	histidine	kinase	AlgZ	[EC:2.7.13.3]
D	lcl|SIZZ01000001.1_prot_TBR40784.1_2027;	K02478	K02478;	two-component	system,	LytTR	family,	sensor	kinase	[EC:2.7.13.3]
D	lcl|SIZZ01000003.1_prot_TBR36071.1_3112;	K02478	K02478;	two-component	system,	LytTR	family,	sensor	kinase	[EC:2.7.13.3]
D	lcl|SIZZ01000003.1_prot_TBR36097.1_3142;	K07708	glnL,	ntrB;	two-component	system,	NtrC	family,	nitrogen	regulation	sensor	histidine	kinase	GlnL	[EC:2.7.13.3]
D	lcl|SIZZ01000001.1_prot_TBR40224.1_1701;	K13598	ntrY;	two-component	system,	NtrC	family,	nitrogen	regulation	sensor	histidine	kinase	NtrY	[EC:2.7.13.3]
D	lcl|SIZZ01000002.1_prot_TBR37024.1_2780;	K02668	pilS,	pehS;	two-component	system,	NtrC	family,	sensor	histidine	kinase	PilS	[EC:2.7.13.3]
D	lcl|SIZZ01000002.1_prot_TBR37215.1_2986;	K03407	cheA;	two-component	system,	chemotaxis	family,	sensor	kinase	CheA	[EC:2.7.13.3]
D	lcl|SIZZ01000002.1_prot_TBR37226.1_2997;	K03407	cheA;	two-component	system,	chemotaxis	family,	sensor	kinase	CheA	[EC:2.7.13.3]
D	lcl|SIZZ01000001.1_prot_TBR40187.1_1660;	K06596	chpA;	chemosensory	pili	system	protein	ChpA	(sensor	histidine	kinase/response	regulator)
D	lcl|SIZZ01000002.1_prot_TBR37021.1_2776;	K11354	cph1;	two-component	system,	chemotaxis	family,	sensor	kinase	Cph1	[EC:2.7.13.3]
D	lcl|SIZZ01000001.1_prot_TBR40750.1_1633;	K15011	regB,	regS,	actS;	two-component	system,	sensor	histidine	kinase	RegB	[EC:2.7.13.3]
D	lcl|SIZZ01000001.1_prot_TBR40393.1_1889;	K11527	K11527;	two-component	system,	sensor	histidine	kinase	and	response	regulator	[EC:2.7.13.3]
C	1009	Protein	phosphatases	and	associated	proteins	[BR:ko01009]
D	lcl|SIZZ01000002.1_prot_TBR36937.1_2689;	K01251	E3.3.1.1,	ahcY;	adenosylhomocysteinase	[EC:3.3.1.1]
D	lcl|SIZZ01000001.1_prot_TBR38976.1_326;	K04079	HSP90A,	htpG;	molecular	chaperone	HtpG
D	lcl|SIZZ01000001.1_prot_TBR39682.1_1106;	K20074	prpC,	phpP;	PPM	family	protein	phosphatase	[EC:3.1.3.16]
C	1002	Peptidases	and	inhibitors	[BR:ko01002]
D	lcl|SIZZ01000001.1_prot_TBR39039.1_395;	K03101	lspA;	signal	peptidase	II	[EC:3.4.23.36]
D	lcl|SIZZ01000001.1_prot_TBR40151.1_1620;	K02654	pilD,	pppA;	leader	peptidase	(prepilin	peptidase)	/	N-methyltransferase	[EC:3.4.23.43	2.1.1.-]
D	lcl|SIZZ01000001.1_prot_TBR39330.1_715;	K01951	guaA,	GMPS;	GMP	synthase	(glutamine-hydrolysing)	[EC:6.3.5.2]
D	lcl|SIZZ01000003.1_prot_TBR36018.1_3053;	K01951	guaA,	GMPS;	GMP	synthase	(glutamine-hydrolysing)	[EC:6.3.5.2]
D	lcl|SIZZ01000001.1_prot_TBR40020.1_1472;	K19303	mepH;	murein	DD-endopeptidase	[EC:3.4.-.-]
D	lcl|SIZZ01000001.1_prot_TBR39089.1_449;	K00764	purF,	PPAT;	amidophosphoribosyltransferase	[EC:2.4.2.14]
D	lcl|SIZZ01000002.1_prot_TBR37298.1_2417;	K00265	gltB;	glutamate	synthase	(NADPH)	large	chain	[EC:1.4.1.13]
D	lcl|SIZZ01000001.1_prot_TBR40373.1_1864;	K00820	glmS,	GFPT;	glutamine---fructose-6-phosphate	transaminase	(isomerizing)	[EC:2.6.1.16]
D	lcl|SIZZ01000003.1_prot_TBR36124.1_3173;	K00820	glmS,	GFPT;	glutamine---fructose-6-phosphate	transaminase	(isomerizing)	[EC:2.6.1.16]
D	lcl|SIZZ01000001.1_prot_TBR39537.1_949;	K01953	asnB,	ASNS;	asparagine	synthase	(glutamine-hydrolysing)	[EC:6.3.5.4]
D	lcl|SIZZ01000001.1_prot_TBR40783.1_2017;	K21470	ycbB;	L,D-transpeptidase	YcbB
D	lcl|SIZZ01000001.1_prot_TBR40438.1_1938;	K07052	K07052;	CAAX	protease	family	protein
D	lcl|SIZZ01000001.1_prot_TBR40588.1_2098;	K07052	K07052;	CAAX	protease	family	protein
D	lcl|SIZZ01000002.1_prot_TBR36442.1_2140;	K01254	LTA4H;	leukotriene-A4	hydrolase	[EC:3.3.2.6]
D	lcl|SIZZ01000002.1_prot_TBR37080.1_2843;	K01256	pepN;	aminopeptidase	N	[EC:3.4.11.2]
D	lcl|SIZZ01000003.1_prot_TBR36030.1_3065;	K01256	pepN;	aminopeptidase	N	[EC:3.4.11.2]
D	lcl|SIZZ01000001.1_prot_TBR38838.1_173;	K08776	NPEPPS;	puromycin-sensitive	aminopeptidase	[EC:3.4.11.14]
D	lcl|SIZZ01000004.1_prot_TBR35902.1_3569;	K01414	prlC;	oligopeptidase	A	[EC:3.4.24.70]
D	lcl|SIZZ01000003.1_prot_TBR36259.1_3324;	K01284	dcp;	peptidyl-dipeptidase	Dcp	[EC:3.4.15.5]
D	lcl|SIZZ01000001.1_prot_TBR40543.1_2053;	K08602	pepF,	pepB;	oligoendopeptidase	F	[EC:3.4.24.-]
D	lcl|SIZZ01000001.1_prot_TBR40043.1_1497;	K08635	MMEL1,	NEP;	neprilysin	[EC:3.4.24.11]
D	lcl|SIZZ01000001.1_prot_TBR39997.1_1447;	K07386	pepO;	putative	endopeptidase	[EC:3.4.24.-]
D	lcl|SIZZ01000002.1_prot_TBR37103.1_2869;	K07386	pepO;	putative	endopeptidase	[EC:3.4.24.-]
D	lcl|SIZZ01000002.1_prot_TBR36821.1_2563;	K08641	vanX;	zinc	D-Ala-D-Ala	dipeptidase	[EC:3.4.13.22]
D	lcl|SIZZ01000002.1_prot_TBR36571.1_2283;	K07263	pqqL;	zinc	protease	[EC:3.4.24.-]
D	lcl|SIZZ01000001.1_prot_TBR40290.1_1776;	K01255	CARP,	pepA;	leucyl	aminopeptidase	[EC:3.4.11.1]
D	lcl|SIZZ01000001.1_prot_TBR40605.1_2117;	K01255	CARP,	pepA;	leucyl	aminopeptidase	[EC:3.4.11.1]
D	lcl|SIZZ01000002.1_prot_TBR36823.1_2565;	K01273	DPEP;	membrane	dipeptidase	[EC:3.4.13.19]
D	lcl|SIZZ01000001.1_prot_TBR38770.1_97;	K01439	dapE;	succinyl-diaminopimelate	desuccinylase	[EC:3.5.1.18]
D	lcl|SIZZ01000003.1_prot_TBR36291.1_3361;	K01451	hipO;	hippurate	hydrolase	[EC:3.5.1.32]
D	lcl|SIZZ01000001.1_prot_TBR38764.1_91;	K01265	map;	methionyl	aminopeptidase	[EC:3.4.11.18]
D	lcl|SIZZ01000002.1_prot_TBR36863.1_2607;	K01271	pepQ;	Xaa-Pro	dipeptidase	[EC:3.4.13.9]
D	lcl|SIZZ01000001.1_prot_TBR39120.1_481;	K01262	pepP;	Xaa-Pro	aminopeptidase	[EC:3.4.11.9]
D	lcl|SIZZ01000002.1_prot_TBR36857.1_2601;	K01262	pepP;	Xaa-Pro	aminopeptidase	[EC:3.4.11.9]
D	lcl|SIZZ01000002.1_prot_TBR36898.1_2645;	K01302	CPQ;	carboxypeptidase	Q	[EC:3.4.17.-]
D	lcl|SIZZ01000001.1_prot_TBR40659.1_498;	K03798	ftsH,	hflB;	cell	division	protease	FtsH	[EC:3.4.24.-]
D	lcl|SIZZ01000001.1_prot_TBR38975.1_325;	K03799	htpX;	heat	shock	protein	HtpX	[EC:3.4.24.-]
D	lcl|SIZZ01000001.1_prot_TBR40335.1_1824;	K03799	htpX;	heat	shock	protein	HtpX	[EC:3.4.24.-]
D	lcl|SIZZ01000001.1_prot_TBR39789.1_1224;	K23010	OMA1;	metalloendopeptidase	OMA1,	mitochondrial	[EC:3.4.24.-]
D	lcl|SIZZ01000001.1_prot_TBR38995.1_347;	K01423	bepA;	beta-barrel	assembly-enhancing	protease	[EC:3.4.-.-]
D	lcl|SIZZ01000001.1_prot_TBR38756.1_82;	K11749	rseP;	regulator	of	sigma	E	protease	[EC:3.4.24.-]
D	lcl|SIZZ01000003.1_prot_3256;	K02172	blaR1;	bla	regulator	protein	blaR1
D	lcl|SIZZ01000001.1_prot_TBR40471.1_1972;	K09933	mtfA;	MtfA	peptidase
D	lcl|SIZZ01000001.1_prot_TBR39666.1_1090;	K04771	degP,	htrA;	serine	protease	Do	[EC:3.4.21.107]
D	lcl|SIZZ01000001.1_prot_TBR40603.1_2114;	K04771	degP,	htrA;	serine	protease	Do	[EC:3.4.21.107]
D	lcl|SIZZ01000001.1_prot_TBR40121.1_1588;	K04691	hhoB,	degS;	serine	protease	DegS	[EC:3.4.21.-]
D	lcl|SIZZ01000001.1_prot_TBR39481.1_888;	K01342	aprE;	subtilisin	[EC:3.4.21.62]
D	lcl|SIZZ01000003.1_prot_TBR36394.1_3413;	K01322	PREP;	prolyl	oligopeptidase	[EC:3.4.21.26]
D	lcl|SIZZ01000004.1_prot_TBR35883.1_3550;	K01278	DPP4,	CD26;	dipeptidyl-peptidase	4	[EC:3.4.14.5]
D	lcl|SIZZ01000004.1_prot_TBR35847.1_3510;	K01303	APEH;	acylaminoacyl-peptidase	[EC:3.4.19.1]
D	lcl|SIZZ01000001.1_prot_TBR40612.1_2124;	K07258	dacC,	dacA,	dacD;	serine-type	D-Ala-D-Ala	carboxypeptidase	(penicillin-binding	protein	5/6)	[EC:3.4.16.4]
D	lcl|SIZZ01000001.1_prot_TBR38961.1_307;	K07259	dacB;	serine-type	D-Ala-D-Ala	carboxypeptidase/endopeptidase	(penicillin-binding	protein	4)	[EC:3.4.16.4	3.4.21.-]
D	lcl|SIZZ01000001.1_prot_TBR39691.1_1117;	K01358	clpP,	CLPP;	ATP-dependent	Clp	protease,	protease	subunit	[EC:3.4.21.92]
D	lcl|SIZZ01000001.1_prot_TBR39689.1_1115;	K01338	lon;	ATP-dependent	Lon	protease	[EC:3.4.21.53]
D	lcl|SIZZ01000001.1_prot_TBR40486.1_1991;	K03503	umuD;	DNA	polymerase	V	[EC:3.4.21.-]
D	lcl|SIZZ01000001.1_prot_TBR39664.1_1088;	K03100	lepB;	signal	peptidase	I	[EC:3.4.21.89]
D	lcl|SIZZ01000001.1_prot_TBR39680.1_1104;	K03100	lepB;	signal	peptidase	I	[EC:3.4.21.89]
D	lcl|SIZZ01000001.1_prot_TBR40627.1_116;	K01259	pip;	proline	iminopeptidase	[EC:3.4.11.5]
D	lcl|SIZZ01000001.1_prot_TBR40072.1_1531;	K01259	pip;	proline	iminopeptidase	[EC:3.4.11.5]
D	lcl|SIZZ01000002.1_prot_TBR37285.1_2307;	K01259	pip;	proline	iminopeptidase	[EC:3.4.11.5]
D	lcl|SIZZ01000001.1_prot_TBR40608.1_2120;	K03797	E3.4.21.102,	prc,	ctpA;	carboxyl-terminal	processing	protease	[EC:3.4.21.102]
D	lcl|SIZZ01000002.1_prot_TBR36692.1_2420;	K03797	E3.4.21.102,	prc,	ctpA;	carboxyl-terminal	processing	protease	[EC:3.4.21.102]
D	lcl|SIZZ01000003.1_prot_TBR36308.1_3379;	K04773	sppA;	protease	IV	[EC:3.4.21.-]
D	lcl|SIZZ01000001.1_prot_TBR40010.1_1462;	K09650	PARL,	PSARL,	PCP1;	rhomboid-like	protein	[EC:3.4.21.105]
D	lcl|SIZZ01000001.1_prot_TBR40250.1_1730;	K01297	ldcA;	muramoyltetrapeptide	carboxypeptidase	[EC:3.4.17.13]
D	lcl|SIZZ01000004.1_prot_TBR35886.1_3553;	K01419	hslV,	clpQ;	ATP-dependent	HslUV	protease,	peptidase	subunit	HslV	[EC:3.4.25.2]
D	lcl|SIZZ01000001.1_prot_TBR40752.1_1638;	K13051	ASRGL1,	iaaA;	L-asparaginase	/	beta-aspartyl-peptidase	[EC:3.5.1.1	3.4.19.5]
D	lcl|SIZZ01000002.1_prot_TBR37272.1_3048;	K13051	ASRGL1,	iaaA;	L-asparaginase	/	beta-aspartyl-peptidase	[EC:3.5.1.1	3.4.19.5]
D	lcl|SIZZ01000002.1_prot_TBR37172.1_2940;	K00681	ggt;	gamma-glutamyltranspeptidase	/	glutathione	hydrolase	[EC:2.3.2.2	3.4.19.13]
D	lcl|SIZZ01000001.1_prot_TBR38741.1_66;	K03592	pmbA;	PmbA	protein
D	lcl|SIZZ01000001.1_prot_TBR38714.1_39;	K03568	tldD;	TldD	protein
D	lcl|SIZZ01000001.1_prot_TBR39310.1_694;	K06894	yfhM;	alpha-2-macroglobulin
D	lcl|SIZZ01000001.1_prot_TBR38836.1_170;	K04087	hflC;	modulator	of	FtsH	protease	HflC
D	lcl|SIZZ01000001.1_prot_TBR38835.1_169;	K04088	hflK;	modulator	of	FtsH	protease	HflK
C	1003	Glycosyltransferases	[BR:ko01003]
D	lcl|SIZZ01000001.1_prot_TBR40148.1_1617;	K23684	aglJ;	dolichol-phosphate	hexosyltransferase	[EC:2.4.1.-]
D	lcl|SIZZ01000002.1_prot_TBR37260.1_3034;	K09667	OGT;	protein	O-GlcNAc	transferase	[EC:2.4.1.255]
D	lcl|SIZZ01000001.1_prot_TBR40137.1_1605;	K23424	TMTC;	protein	O-mannosyl-transferase	[EC:2.4.1.-]
D	lcl|SIZZ01000001.1_prot_TBR40147.1_1616;	K13668	pimB;	phosphatidyl-myo-inositol	dimannoside	synthase	[EC:2.4.1.346]
D	lcl|SIZZ01000001.1_prot_TBR39355.1_743;	K00694	bcsA;	cellulose	synthase	(UDP-forming)	[EC:2.4.1.12]
D	lcl|SIZZ01000001.1_prot_TBR40330.1_1819;	K03814	mtgA;	monofunctional	glycosyltransferase	[EC:2.4.1.129]
D	lcl|SIZZ01000001.1_prot_TBR39311.1_695;	K05367	pbpC;	penicillin-binding	protein	1C	[EC:2.4.1.129]
D	lcl|SIZZ01000002.1_prot_TBR37113.1_2879;	K05365	mrcB;	penicillin-binding	protein	1B	[EC:2.4.1.129	3.4.16.4]
D	lcl|SIZZ01000002.1_prot_TBR36884.1_2629;	K05366	mrcA;	penicillin-binding	protein	1A	[EC:2.4.1.129	3.4.16.4]
D	lcl|SIZZ01000001.1_prot_TBR40685.1_842;	K19290	alg8;	mannuronan	synthase	[EC:2.4.1.33]
D	lcl|SIZZ01000003.1_prot_TBR36182.1_3240;	K11936	pgaC,	icaA;	poly-beta-1,6-N-acetyl-D-glucosamine	synthase	[EC:2.4.1.-]
D	lcl|SIZZ01000003.1_prot_TBR36178.1_3236;	K19424	epsF;	glycosyltransferase	EpsF	[EC:2.4.-.-]
D	lcl|SIZZ01000002.1_prot_TBR37327.1_2792;	K00697	otsA;	trehalose	6-phosphate	synthase	[EC:2.4.1.15	2.4.1.347]
D	lcl|SIZZ01000003.1_prot_TBR36177.1_3235;	K16697	tuaC;	teichuronic	acid	biosynthesis	glycosyltransferase	TuaC	[EC:2.4.-.-]
C	1005	Lipopolysaccharide	biosynthesis	proteins	[BR:ko01005]
D	lcl|SIZZ01000001.1_prot_TBR38752.1_78;	K00677	lpxA;	UDP-N-acetylglucosamine	acyltransferase	[EC:2.3.1.129]
D	lcl|SIZZ01000001.1_prot_TBR38751.1_77;	K00748	lpxB;	lipid-A-disaccharide	synthase	[EC:2.4.1.182]
D	lcl|SIZZ01000002.1_prot_TBR36986.1_2741;	K02535	lpxC;	UDP-3-O-[3-hydroxymyristoyl]	N-acetylglucosamine	deacetylase	[EC:3.5.1.108]
D	lcl|SIZZ01000001.1_prot_TBR38754.1_80;	K02536	lpxD;	UDP-3-O-[3-hydroxymyristoyl]	glucosamine	N-acyltransferase	[EC:2.3.1.191]
D	lcl|SIZZ01000001.1_prot_TBR38989.1_341;	K03269	lpxH;	UDP-2,3-diacylglucosamine	hydrolase	[EC:3.6.1.54]
D	lcl|SIZZ01000001.1_prot_TBR39169.1_537;	K00912	lpxK;	tetraacyldisaccharide	4'-kinase	[EC:2.7.1.130]
D	lcl|SIZZ01000002.1_prot_TBR36499.1_2206;	K02517	lpxL,	htrB;	Kdo2-lipid	IVA	lauroyltransferase/acyltransferase	[EC:2.3.1.241	2.3.1.-]
D	lcl|SIZZ01000003.1_prot_TBR36325.1_3398;	K02517	lpxL,	htrB;	Kdo2-lipid	IVA	lauroyltransferase/acyltransferase	[EC:2.3.1.241	2.3.1.-]
D	lcl|SIZZ01000001.1_prot_TBR39001.1_353;	K12979	lpxO;	beta-hydroxylase	[EC:1.14.11.-]
D	lcl|SIZZ01000003.1_prot_TBR36326.1_3399;	K02527	kdtA,	waaA;	3-deoxy-D-manno-octulosonic-acid	transferase	[EC:2.4.99.12	2.4.99.13	2.4.99.14	2.4.99.15]
D	lcl|SIZZ01000001.1_prot_TBR39745.1_1176;	K07264	arnT,	pmrK;	4-amino-4-deoxy-L-arabinose	transferase	[EC:2.4.2.43]
D	lcl|SIZZ01000002.1_prot_TBR36509.1_2216;	K07264	arnT,	pmrK;	4-amino-4-deoxy-L-arabinose	transferase	[EC:2.4.2.43]
D	lcl|SIZZ01000001.1_prot_TBR39172.1_541;	K11211	kdkA;	3-deoxy-D-manno-octulosonic	acid	kinase	[EC:2.7.1.166]
D	lcl|SIZZ01000001.1_prot_TBR39122.1_483;	K01627	kdsA;	2-dehydro-3-deoxyphosphooctonate	aldolase	(KDO	8-P	synthase)	[EC:2.5.1.55]
D	lcl|SIZZ01000001.1_prot_TBR39563.1_977;	K00979	kdsB;	3-deoxy-manno-octulosonate	cytidylyltransferase	(CMP-KDO	synthetase)	[EC:2.7.7.38]
D	lcl|SIZZ01000002.1_prot_TBR37134.1_2901;	K03270	kdsC;	3-deoxy-D-manno-octulosonate	8-phosphate	phosphatase	(KDO	8-P	phosphatase)	[EC:3.1.3.45]
D	lcl|SIZZ01000002.1_prot_TBR37135.1_2902;	K06041	kdsD,	kpsF;	arabinose-5-phosphate	isomerase	[EC:5.3.1.13]
D	lcl|SIZZ01000002.1_prot_TBR36503.1_2210;	K12984	waaE,	kdtX;	(heptosyl)LPS	beta-1,4-glucosyltransferase	[EC:2.4.1.-]
D	lcl|SIZZ01000001.1_prot_TBR40665.1_540;	K12982	opsX;	heptosyltransferase	I	[EC:2.4.-.-]
D	lcl|SIZZ01000001.1_prot_TBR39469.1_875;	K12988	wapR;	alpha-1,3-rhamnosyltransferase	[EC:2.4.1.-]
D	lcl|SIZZ01000001.1_prot_TBR40767.1_1851;	K03271	gmhA,	lpcA;	D-sedoheptulose	7-phosphate	isomerase	[EC:5.3.1.28]
D	lcl|SIZZ01000001.1_prot_TBR40360.1_1849;	K03273	gmhB;	D-glycero-D-manno-heptose	1,7-bisphosphate	phosphatase	[EC:3.1.3.82	3.1.3.83]
D	lcl|SIZZ01000001.1_prot_TBR39307.1_691;	K13007	wbpL;	glycosyltransferase	WbpL	[EC:2.4.1.-]
D	lcl|SIZZ01000001.1_prot_TBR40331.1_1820;	K20534	gtrB;	polyisoprenyl-phosphate	glycosyltransferase	[EC:2.4.-.-]
C	1011	Peptidoglycan	biosynthesis	and	degradation	proteins	[BR:ko01011]
D	lcl|SIZZ01000002.1_prot_TBR37137.1_2904;	K00790	murA;	UDP-N-acetylglucosamine	1-carboxyvinyltransferase	[EC:2.5.1.7]
D	lcl|SIZZ01000001.1_prot_TBR40710.1_1135;	K00075	murB;	UDP-N-acetylmuramate	dehydrogenase	[EC:1.3.1.98]
D	lcl|SIZZ01000002.1_prot_TBR36981.1_2736;	K01924	murC;	UDP-N-acetylmuramate--alanine	ligase	[EC:6.3.2.8]
D	lcl|SIZZ01000002.1_prot_TBR37099.1_2865;	K01925	murD;	UDP-N-acetylmuramoylalanine--D-glutamate	ligase	[EC:6.3.2.9]
D	lcl|SIZZ01000002.1_prot_TBR36976.1_2731;	K01928	murE;	UDP-N-acetylmuramoyl-L-alanyl-D-glutamate--2,6-diaminopimelate	ligase	[EC:6.3.2.13]
D	lcl|SIZZ01000002.1_prot_TBR36982.1_2737;	K01921	ddl;	D-alanine-D-alanine	ligase	[EC:6.3.2.4]
D	lcl|SIZZ01000001.1_prot_TBR39935.1_1381;	K01775	alr;	alanine	racemase	[EC:5.1.1.1]
D	lcl|SIZZ01000001.1_prot_TBR40250.1_1730;	K01297	ldcA;	muramoyltetrapeptide	carboxypeptidase	[EC:3.4.17.13]
D	lcl|SIZZ01000002.1_prot_TBR36978.1_2733;	K01000	mraY;	phospho-N-acetylmuramoyl-pentapeptide-transferase	[EC:2.7.8.13]
D	lcl|SIZZ01000002.1_prot_TBR36980.1_2735;	K02563	murG;	UDP-N-acetylglucosamine--N-acetylmuramyl-(pentapeptide)	pyrophosphoryl-undecaprenol	N-acetylglucosamine	transferase	[EC:2.4.1.227]
D	lcl|SIZZ01000004.1_prot_TBR35805.1_3466;	K06153	bacA;	undecaprenyl-diphosphatase	[EC:3.6.1.27]
D	lcl|SIZZ01000001.1_prot_TBR39766.1_1199;	K19302	bcrC;	undecaprenyl-diphosphatase	[EC:3.6.1.27]
D	lcl|SIZZ01000001.1_prot_TBR39036.1_392;	K03980	murJ,	mviN;	putative	peptidoglycan	lipid	II	flippase
D	lcl|SIZZ01000002.1_prot_TBR36884.1_2629;	K05366	mrcA;	penicillin-binding	protein	1A	[EC:2.4.1.129	3.4.16.4]
D	lcl|SIZZ01000002.1_prot_TBR37113.1_2879;	K05365	mrcB;	penicillin-binding	protein	1B	[EC:2.4.1.129	3.4.16.4]
D	lcl|SIZZ01000001.1_prot_TBR39311.1_695;	K05367	pbpC;	penicillin-binding	protein	1C	[EC:2.4.1.129]
D	lcl|SIZZ01000001.1_prot_TBR40790.1_2131;	K05515	mrdA;	penicillin-binding	protein	2	[EC:3.4.16.4]
D	lcl|SIZZ01000002.1_prot_TBR37325.1_2730;	K03587	ftsI;	cell	division	protein	FtsI	(penicillin-binding	protein	3)	[EC:3.4.16.4]
D	lcl|SIZZ01000001.1_prot_TBR40612.1_2124;	K07258	dacC,	dacA,	dacD;	serine-type	D-Ala-D-Ala	carboxypeptidase	(penicillin-binding	protein	5/6)	[EC:3.4.16.4]
D	lcl|SIZZ01000001.1_prot_TBR38961.1_307;	K07259	dacB;	serine-type	D-Ala-D-Ala	carboxypeptidase/endopeptidase	(penicillin-binding	protein	4)	[EC:3.4.16.4	3.4.21.-]
D	lcl|SIZZ01000001.1_prot_TBR40330.1_1819;	K03814	mtgA;	monofunctional	glycosyltransferase	[EC:2.4.1.129]
D	lcl|SIZZ01000001.1_prot_TBR40783.1_2017;	K21470	ycbB;	L,D-transpeptidase	YcbB
D	lcl|SIZZ01000002.1_prot_TBR36821.1_2563;	K08641	vanX;	zinc	D-Ala-D-Ala	dipeptidase	[EC:3.4.13.22]
D	lcl|SIZZ01000001.1_prot_TBR40020.1_1472;	K19303	mepH;	murein	DD-endopeptidase	[EC:3.4.-.-]
D	lcl|SIZZ01000003.1_prot_TBR36385.1_3313;	K08309	slt;	soluble	lytic	murein	transglycosylase	[EC:4.2.2.-]
D	lcl|SIZZ01000001.1_prot_TBR40613.1_2126;	K08305	mltB;	membrane-bound	lytic	murein	transglycosylase	B	[EC:4.2.2.-]
D	lcl|SIZZ01000001.1_prot_TBR40708.1_1111;	K08307	mltD,	dniR;	membrane-bound	lytic	murein	transglycosylase	D	[EC:4.2.2.-]
D	lcl|SIZZ01000001.1_prot_TBR39018.1_372;	K01448	amiABC;	N-acetylmuramoyl-L-alanine	amidase	[EC:3.5.1.28]
D	lcl|SIZZ01000001.1_prot_TBR40657.1_451;	K11066	E3.5.1.28D,	amiD;	N-acetylmuramoyl-L-alanine	amidase	[EC:3.5.1.28]
C	1004	Lipid	biosynthesis	proteins	[BR:ko01004]
D	lcl|SIZZ01000001.1_prot_TBR39189.1_559;	K00645	fabD,	MCAT,	MCT1;	[acyl-carrier-protein]	S-malonyltransferase	[EC:2.3.1.39]
D	lcl|SIZZ01000001.1_prot_TBR39188.1_558;	K00648	fabH;	3-oxoacyl-[acyl-carrier-protein]	synthase	III	[EC:2.3.1.180]
D	lcl|SIZZ01000001.1_prot_TBR39798.1_1235;	K00647	fabB;	3-oxoacyl-[acyl-carrier-protein]	synthase	I	[EC:2.3.1.41]
D	lcl|SIZZ01000001.1_prot_TBR39192.1_562;	K09458	fabF,	OXSM,	CEM1;	3-oxoacyl-[acyl-carrier-protein]	synthase	II	[EC:2.3.1.179]
D	lcl|SIZZ01000001.1_prot_TBR39797.1_1234;	K09458	fabF,	OXSM,	CEM1;	3-oxoacyl-[acyl-carrier-protein]	synthase	II	[EC:2.3.1.179]
D	lcl|SIZZ01000001.1_prot_TBR39190.1_560;	K00059	fabG,	OAR1;	3-oxoacyl-[acyl-carrier	protein]	reductase	[EC:1.1.1.100]
D	lcl|SIZZ01000001.1_prot_TBR39384.1_772;	K00059	fabG,	OAR1;	3-oxoacyl-[acyl-carrier	protein]	reductase	[EC:1.1.1.100]
D	lcl|SIZZ01000001.1_prot_TBR39489.1_896;	K00059	fabG,	OAR1;	3-oxoacyl-[acyl-carrier	protein]	reductase	[EC:1.1.1.100]
D	lcl|SIZZ01000001.1_prot_TBR39807.1_1246;	K00059	fabG,	OAR1;	3-oxoacyl-[acyl-carrier	protein]	reductase	[EC:1.1.1.100]
D	lcl|SIZZ01000001.1_prot_TBR39944.1_1390;	K00059	fabG,	OAR1;	3-oxoacyl-[acyl-carrier	protein]	reductase	[EC:1.1.1.100]
D	lcl|SIZZ01000001.1_prot_TBR38753.1_79;	K02372	fabZ;	3-hydroxyacyl-[acyl-carrier-protein]	dehydratase	[EC:4.2.1.59]
D	lcl|SIZZ01000001.1_prot_TBR39686.1_1112;	K00208	fabI;	enoyl-[acyl-carrier	protein]	reductase	I	[EC:1.3.1.9	1.3.1.10]
D	lcl|SIZZ01000001.1_prot_TBR39414.1_811;	K00209	fabV,	ter;	enoyl-[acyl-carrier	protein]	reductase	/	trans-2-enoyl-CoA	reductase	(NAD+)	[EC:1.3.1.9	1.3.1.44]
D	lcl|SIZZ01000001.1_prot_TBR40171.1_1644;	K10804	tesA;	acyl-CoA	thioesterase	I	[EC:3.1.2.-	3.1.2.2	3.1.1.2	3.1.1.5]
D	lcl|SIZZ01000001.1_prot_TBR38813.1_145;	K10805	tesB;	acyl-CoA	thioesterase	II	[EC:3.1.2.-]
D	lcl|SIZZ01000002.1_prot_TBR37273.1_3049;	K10806	yciA;	acyl-CoA	thioesterase	YciA	[EC:3.1.2.-]
D	lcl|SIZZ01000002.1_prot_TBR36604.1_2317;	K00507	SCD,	desC;	stearoyl-CoA	desaturase	(Delta-9	desaturase)	[EC:1.14.19.1]
D	lcl|SIZZ01000001.1_prot_TBR39060.1_418;	K22769	desA3;	NADPH-dependent	stearoyl-CoA	9-desaturase	[EC:1.14.19.-]
D	lcl|SIZZ01000003.1_prot_TBR36381.1_3242;	K13611	pksJ;	polyketide	synthase	PksJ
D	lcl|SIZZ01000004.1_prot_TBR35860.1_3525;	K01895	ACSS1_2,	acs;	acetyl-CoA	synthetase	[EC:6.2.1.1]
D	lcl|SIZZ01000001.1_prot_TBR39877.1_1319;	K01908	ACSS3,	prpE;	propionyl-CoA	synthetase	[EC:6.2.1.17]
D	lcl|SIZZ01000001.1_prot_TBR39577.1_993;	K01897	ACSL,	fadD;	long-chain	acyl-CoA	synthetase	[EC:6.2.1.3]
D	lcl|SIZZ01000001.1_prot_TBR39425.1_823;	K00666	K00666;	fatty-acyl-CoA	synthase	[EC:6.2.1.-]
D	lcl|SIZZ01000003.1_prot_TBR36202.1_3263;	K00666	K00666;	fatty-acyl-CoA	synthase	[EC:6.2.1.-]
D	lcl|SIZZ01000002.1_prot_TBR36586.1_2298;	K00631	plsB;	glycerol-3-phosphate	O-acyltransferase	[EC:2.3.1.15]
C	1008	Polyketide	biosynthesis	proteins	[BR:ko01008]
D	lcl|SIZZ01000003.1_prot_TBR36381.1_3242;	K13611	pksJ;	polyketide	synthase	PksJ
D	lcl|SIZZ01000003.1_prot_TBR36183.1_3241;	K15654	srfAA,	lchAA;	surfactin	family	lipopeptide	synthetase	A
D	lcl|SIZZ01000001.1_prot_TBR39047.1_404;	K02362	entD;	enterobactin	synthetase	component	D	[EC:6.3.2.14	2.7.8.-]
C	1006	Prenyltransferases	[BR:ko01006]
D	lcl|SIZZ01000001.1_prot_TBR38743.1_68;	K13789	GGPS;	geranylgeranyl	diphosphate	synthase,	type	II	[EC:2.5.1.1	2.5.1.10	2.5.1.29]
D	lcl|SIZZ01000002.1_prot_TBR37003.1_2758;	K02523	ispB;	octaprenyl-diphosphate	synthase	[EC:2.5.1.90]
D	lcl|SIZZ01000001.1_prot_TBR38758.1_85;	K00806	uppS;	undecaprenyl	diphosphate	synthase	[EC:2.5.1.31]
D	lcl|SIZZ01000001.1_prot_TBR38832.1_166;	K00791	miaA,	TRIT1;	tRNA	dimethylallyltransferase	[EC:2.5.1.75]
D	lcl|SIZZ01000003.1_prot_TBR36104.1_3149;	K03179	ubiA;	4-hydroxybenzoate	polyprenyltransferase	[EC:2.5.1.39]
D	lcl|SIZZ01000002.1_prot_TBR36672.1_2393;	K02257	COX10,	ctaB,	cyoE;	heme	o	synthase	[EC:2.5.1.141]
C	1007	Amino	acid	related	enzymes	[BR:ko01007]
D	lcl|SIZZ01000001.1_prot_TBR38895.1_237;	K01885	EARS,	gltX;	glutamyl-tRNA	synthetase	[EC:6.1.1.17]
D	lcl|SIZZ01000002.1_prot_TBR37074.1_2837;	K01886	QARS,	glnS;	glutaminyl-tRNA	synthetase	[EC:6.1.1.18]
D	lcl|SIZZ01000001.1_prot_TBR38974.1_324;	K01894	gluQ;	glutamyl-Q	tRNA(Asp)	synthetase	[EC:6.1.1.-]
D	lcl|SIZZ01000004.1_prot_TBR35776.1_3434;	K01866	YARS,	tyrS;	tyrosyl-tRNA	synthetase	[EC:6.1.1.1]
D	lcl|SIZZ01000001.1_prot_TBR40464.1_1965;	K01867	WARS,	trpS;	tryptophanyl-tRNA	synthetase	[EC:6.1.1.2]
D	lcl|SIZZ01000001.1_prot_TBR39915.1_1358;	K01883	CARS,	cysS;	cysteinyl-tRNA	synthetase	[EC:6.1.1.16]
D	lcl|SIZZ01000004.1_prot_TBR35787.1_3447;	K01887	RARS,	argS;	arginyl-tRNA	synthetase	[EC:6.1.1.19]
D	lcl|SIZZ01000001.1_prot_TBR38858.1_196;	K01874	MARS,	metG;	methionyl-tRNA	synthetase	[EC:6.1.1.10]
D	lcl|SIZZ01000001.1_prot_TBR39038.1_394;	K01870	IARS,	ileS;	isoleucyl-tRNA	synthetase	[EC:6.1.1.5]
D	lcl|SIZZ01000001.1_prot_TBR40214.1_1690;	K01873	VARS,	valS;	valyl-tRNA	synthetase	[EC:6.1.1.9]
D	lcl|SIZZ01000001.1_prot_TBR39985.1_1433;	K01869	LARS,	leuS;	leucyl-tRNA	synthetase	[EC:6.1.1.4]
D	lcl|SIZZ01000001.1_prot_TBR39535.1_947;	K04567	KARS,	lysS;	lysyl-tRNA	synthetase,	class	II	[EC:6.1.1.6]
D	lcl|SIZZ01000002.1_prot_TBR37051.1_2811;	K01876	DARS2,	aspS;	aspartyl-tRNA	synthetase	[EC:6.1.1.12]
D	lcl|SIZZ01000001.1_prot_TBR39941.1_1387;	K01893	NARS,	asnS;	asparaginyl-tRNA	synthetase	[EC:6.1.1.22]
D	lcl|SIZZ01000001.1_prot_TBR39097.1_458;	K01892	HARS,	hisS;	histidyl-tRNA	synthetase	[EC:6.1.1.21]
D	lcl|SIZZ01000003.1_prot_TBR36020.1_3055;	K01878	glyQ;	glycyl-tRNA	synthetase	alpha	chain	[EC:6.1.1.14]
D	lcl|SIZZ01000003.1_prot_TBR36021.1_3056;	K01879	glyS;	glycyl-tRNA	synthetase	beta	chain	[EC:6.1.1.14]
D	lcl|SIZZ01000001.1_prot_TBR39622.1_1045;	K01875	SARS,	serS;	seryl-tRNA	synthetase	[EC:6.1.1.11]
D	lcl|SIZZ01000001.1_prot_TBR40220.1_1696;	K01881	PARS,	proS;	prolyl-tRNA	synthetase	[EC:6.1.1.15]
D	lcl|SIZZ01000001.1_prot_TBR40089.1_1549;	K01868	TARS,	thrS;	threonyl-tRNA	synthetase	[EC:6.1.1.3]
D	lcl|SIZZ01000001.1_prot_TBR38985.1_336;	K01872	AARS,	alaS;	alanyl-tRNA	synthetase	[EC:6.1.1.7]
D	lcl|SIZZ01000001.1_prot_TBR40085.1_1545;	K01889	FARSA,	pheS;	phenylalanyl-tRNA	synthetase	alpha	chain	[EC:6.1.1.20]
D	lcl|SIZZ01000001.1_prot_TBR40084.1_1544;	K01890	FARSB,	pheT;	phenylalanyl-tRNA	synthetase	beta	chain	[EC:6.1.1.20]
D	lcl|SIZZ01000001.1_prot_TBR39879.1_1321;	K00812	aspB;	aspartate	aminotransferase	[EC:2.6.1.1]
D	lcl|SIZZ01000002.1_prot_TBR36777.1_2514;	K14260	alaA;	alanine-synthesizing	transaminase	[EC:2.6.1.66	2.6.1.2]
D	lcl|SIZZ01000002.1_prot_TBR36581.1_2293;	K00832	tyrB;	aromatic-amino-acid	transaminase	[EC:2.6.1.57]
D	lcl|SIZZ01000001.1_prot_TBR39585.1_1001;	K14287	ybdL;	methionine	transaminase	[EC:2.6.1.88]
D	lcl|SIZZ01000001.1_prot_TBR39103.1_464;	K00817	hisC;	histidinol-phosphate	aminotransferase	[EC:2.6.1.9]
D	lcl|SIZZ01000001.1_prot_TBR38827.1_160;	K00639	kbl,	GCAT;	glycine	C-acetyltransferase	[EC:2.3.1.29]
D	lcl|SIZZ01000003.1_prot_TBR36041.1_3080;	K00652	bioF;	8-amino-7-oxononanoate	synthase	[EC:2.3.1.47]
D	lcl|SIZZ01000003.1_prot_TBR36353.1_3427;	K00821	argD;	acetylornithine/N-succinyldiaminopimelate	aminotransferase	[EC:2.6.1.11	2.6.1.17]
D	lcl|SIZZ01000001.1_prot_TBR40035.1_1488;	K00823	puuE;	4-aminobutyrate	aminotransferase	[EC:2.6.1.19]
D	lcl|SIZZ01000001.1_prot_TBR40182.1_1655;	K00833	bioA;	adenosylmethionine---8-amino-7-oxononanoate	aminotransferase	[EC:2.6.1.62]
D	lcl|SIZZ01000003.1_prot_TBR36354.1_3430;	K01845	hemL;	glutamate-1-semialdehyde	2,1-aminomutase	[EC:5.4.3.8]
D	lcl|SIZZ01000002.1_prot_TBR36933.1_2685;	K00826	E2.6.1.42,	ilvE;	branched-chain	amino	acid	aminotransferase	[EC:2.6.1.42]
D	lcl|SIZZ01000003.1_prot_TBR36114.1_3160;	K00826	E2.6.1.42,	ilvE;	branched-chain	amino	acid	aminotransferase	[EC:2.6.1.42]
D	lcl|SIZZ01000001.1_prot_TBR39566.1_980;	K00831	serC,	PSAT1;	phosphoserine	aminotransferase	[EC:2.6.1.52]
D	lcl|SIZZ01000001.1_prot_TBR39471.1_877;	K13017	wbpE,	wlbC;	UDP-2-acetamido-2-deoxy-ribo-hexuluronate	aminotransferase	[EC:2.6.1.98]
C	199	Cytochrome	P450	[BR:ko00199]
C	194	Photosynthesis	proteins	[BR:ko00194]
D	lcl|SIZZ01000002.1_prot_TBR36540.1_2247;	K02114	ATPF1E,	atpC;	F-type	H+-transporting	ATPase	subunit	epsilon
D	lcl|SIZZ01000002.1_prot_TBR36539.1_2246;	K02112	ATPF1B,	atpD;	F-type	H+/Na+-transporting	ATPase	subunit	beta	[EC:7.1.2.2	7.2.2.1]
D	lcl|SIZZ01000002.1_prot_TBR36538.1_2245;	K02115	ATPF1G,	atpG;	F-type	H+-transporting	ATPase	subunit	gamma
D	lcl|SIZZ01000002.1_prot_TBR36537.1_2244;	K02111	ATPF1A,	atpA;	F-type	H+/Na+-transporting	ATPase	subunit	alpha	[EC:7.1.2.2	7.2.2.1]
D	lcl|SIZZ01000002.1_prot_TBR36536.1_2243;	K02113	ATPF1D,	atpH;	F-type	H+-transporting	ATPase	subunit	delta
D	lcl|SIZZ01000002.1_prot_TBR36535.1_2242;	K02109	ATPF0B,	atpF;	F-type	H+-transporting	ATPase	subunit	b
D	lcl|SIZZ01000002.1_prot_TBR36534.1_2241;	K02110	ATPF0C,	atpE;	F-type	H+-transporting	ATPase	subunit	c
D	lcl|SIZZ01000002.1_prot_TBR36533.1_2240;	K02108	ATPF0A,	atpB;	F-type	H+-transporting	ATPase	subunit	a
B
B	9182	Protein	families:	genetic	information	processing
C	3000	Transcription	factors	[BR:ko03000]
D	lcl|SIZZ01000002.1_prot_TBR37090.1_2853;	K09186	MLL1;	[histone	H3]-lysine4	N-trimethyltransferase	MLL1	[EC:2.1.1.354]
D	lcl|SIZZ01000001.1_prot_TBR40542.1_2052;	K03490	chbR,	celD;	AraC	family	transcriptional	regulator,	dual	regulator	of	chb	operon
D	lcl|SIZZ01000002.1_prot_TBR36489.1_2194;	K18991	mtrA;	AraC	family	transcriptional	regulator,	activator	of	mtrCDE
D	lcl|SIZZ01000001.1_prot_TBR39761.1_1194;	K13652	K13652;	AraC	family	transcriptional	regulator
D	lcl|SIZZ01000001.1_prot_TBR39780.1_1214;	K13653	K13653;	AraC	family	transcriptional	regulator
D	lcl|SIZZ01000001.1_prot_TBR39846.1_1286;	K07506	K07506;	AraC	family	transcriptional	regulator
D	lcl|SIZZ01000002.1_prot_TBR36921.1_2671;	K10778	ada;	AraC	family	transcriptional	regulator,	regulatory	protein	of	adaptative	response	/	methylated-DNA-[protein]-cysteine	methyltransferase	[EC:2.1.1.63]
D	lcl|SIZZ01000001.1_prot_TBR38919.1_261;	K13529	ada-alkA;	AraC	family	transcriptional	regulator,	regulatory	protein	of	adaptative	response	/	DNA-3-methyladenine	glycosylase	II	[EC:3.2.2.21]
D	lcl|SIZZ01000004.1_prot_TBR35954.1_3623;	K13633	ftrA;	AraC	family	transcriptional	regulator,	transcriptional	activator	FtrA
D	lcl|SIZZ01000002.1_prot_TBR36630.1_2345;	K03566	gcvA;	LysR	family	transcriptional	regulator,	glycine	cleavage	system	transcriptional	activator
D	lcl|SIZZ01000002.1_prot_TBR37079.1_2842;	K04761	oxyR;	LysR	family	transcriptional	regulator,	hydrogen	peroxide-inducible	genes	activator
D	lcl|SIZZ01000001.1_prot_TBR39241.1_613;	K13634	cysB;	LysR	family	transcriptional	regulator,	cys	regulon	transcriptional	activator
D	lcl|SIZZ01000001.1_prot_TBR40507.1_2012;	K16135	dmlR;	LysR	family	transcriptional	regulator,	transcriptional	activator	for	dmlA
D	lcl|SIZZ01000002.1_prot_TBR36562.1_2274;	K21711	pycR;	LysR	family	transcriptional	regulator,	putative	pyruvate	carboxylase	regulator
D	lcl|SIZZ01000001.1_prot_TBR38862.1_200;	K02444	glpR;	DeoR	family	transcriptional	regulator,	glycerol-3-phosphate	regulon	repressor
D	lcl|SIZZ01000001.1_prot_TBR39835.1_1275;	K03436	fruR2,	fruR;	DeoR	family	transcriptional	regulator,	fructose	operon	transcriptional	repressor
D	lcl|SIZZ01000001.1_prot_TBR39056.1_414;	K09012	sufR;	DeoR	family	transcriptional	regulator,	suf	operon	transcriptional	repressor
D	lcl|SIZZ01000001.1_prot_TBR39738.1_1169;	K02529	lacI,	galR;	LacI	family	transcriptional	regulator
D	lcl|SIZZ01000002.1_prot_TBR36487.1_2192;	K02529	lacI,	galR;	LacI	family	transcriptional	regulator
D	lcl|SIZZ01000002.1_prot_TBR37019.1_2774;	K02529	lacI,	galR;	LacI	family	transcriptional	regulator
D	lcl|SIZZ01000004.1_prot_TBR35912.1_3579;	K02529	lacI,	galR;	LacI	family	transcriptional	regulator
D	lcl|SIZZ01000003.1_prot_TBR36373.1_3174;	K05499	cytR;	LacI	family	transcriptional	regulator,	repressor	for	deo	operon,	udp,	cdd,	tsx,	nupC,	and	nupG
D	lcl|SIZZ01000002.1_prot_TBR36752.1_2485;	K03487	ascG;	LacI	family	transcriptional	regulator,	asc	operon	repressor
D	lcl|SIZZ01000004.1_prot_TBR35995.1_3617;	K24967	nagR;	GntR	family	transcriptional	regulator,	N-acetylglucosamine	utilization	regulator
D	lcl|SIZZ01000002.1_prot_TBR36769.1_2505;	K00375	K00375;	GntR	family	transcriptional	regulator	/	MocR	family	aminotransferase
D	lcl|SIZZ01000001.1_prot_TBR39251.1_623;	K07979	ytrA;	GntR	family	transcriptional	regulator
D	lcl|SIZZ01000001.1_prot_TBR38979.1_330;	K16137	nemR;	TetR/AcrR	family	transcriptional	regulator,	transcriptional	repressor	for	nem	operon
D	lcl|SIZZ01000001.1_prot_TBR39898.1_1341;	K16137	nemR;	TetR/AcrR	family	transcriptional	regulator,	transcriptional	repressor	for	nem	operon
D	lcl|SIZZ01000003.1_prot_TBR36330.1_3403;	K18301	mexL;	TetR/AcrR	family	transcriptional	regulator,	mexJK	operon	transcriptional	repressor
D	lcl|SIZZ01000001.1_prot_TBR40293.1_1779;	K18939	lmrA,	yxaF;	TetR/AcrR	family	transcriptional	regulator,	lmrAB	and	yxaGH	operons	repressor
D	lcl|SIZZ01000001.1_prot_TBR39058.1_416;	K22105	fabR;	TetR/AcrR	family	transcriptional	regulator,	fatty	acid	biosynthesis	regulator
D	lcl|SIZZ01000002.1_prot_TBR36594.1_2306;	K03718	asnC;	Lrp/AsnC	family	transcriptional	regulator,	regulator	for	asnA,	asnC	and	gidA
D	lcl|SIZZ01000004.1_prot_TBR35833.1_3496;	K03719	lrp;	Lrp/AsnC	family	transcriptional	regulator,	leucine-responsive	regulatory	protein
D	lcl|SIZZ01000001.1_prot_TBR39418.1_815;	K03556	malT;	LuxR	family	transcriptional	regulator,	maltose	regulon	positive	regulatory	protein
D	lcl|SIZZ01000004.1_prot_TBR35933.1_3601;	K03712	marR;	MarR	family	transcriptional	regulator,	multiple	antibiotic	resistance	protein	MarR
D	lcl|SIZZ01000002.1_prot_TBR36895.1_2642;	K06075	slyA;	MarR	family	transcriptional	regulator,	transcriptional	regulator	for	hemolysin
D	lcl|SIZZ01000002.1_prot_TBR36573.1_2285;	K15974	emrR,	mprA;	MarR	family	transcriptional	regulator,	negative	regulator	of	the	multidrug	operon	emrRAB
D	lcl|SIZZ01000001.1_prot_TBR39954.1_1401;	K23775	ohrR;	MarR	family	transcriptional	regulator,	organic	hydroperoxide	resistance	regulator
D	lcl|SIZZ01000001.1_prot_TBR39073.1_433;	K19591	cueR;	MerR	family	transcriptional	regulator,	copper	efflux	regulator
D	lcl|SIZZ01000003.1_prot_TBR36166.1_3222;	K21743	mta;	MerR	family	transcriptional	regulator,	multidrug-efflux	activator
D	lcl|SIZZ01000001.1_prot_TBR39282.1_664;	K03711	fur,	zur,	furB;	Fur	family	transcriptional	regulator,	ferric	uptake	regulator
D	lcl|SIZZ01000001.1_prot_TBR38897.1_239;	K09823	zur;	Fur	family	transcriptional	regulator,	zinc	uptake	regulator
D	lcl|SIZZ01000001.1_prot_TBR40265.1_1747;	K10914	crp;	CRP/FNR	family	transcriptional	regulator,	cyclic	AMP	receptor	protein
D	lcl|SIZZ01000002.1_prot_TBR36841.1_2584;	K10914	crp;	CRP/FNR	family	transcriptional	regulator,	cyclic	AMP	receptor	protein
D	lcl|SIZZ01000001.1_prot_TBR39638.1_1061;	K01420	fnr;	CRP/FNR	family	transcriptional	regulator,	anaerobic	regulatory	protein
D	lcl|SIZZ01000001.1_prot_TBR40049.1_1503;	K13772	rirA;	Rrf2	family	transcriptional	regulator,	iron-responsive	regulator
D	lcl|SIZZ01000001.1_prot_TBR40786.1_2034;	K03892	arsR;	ArsR	family	transcriptional	regulator,	arsenate/arsenite/antimonite-responsive	transcriptional	repressor
D	lcl|SIZZ01000001.1_prot_TBR39843.1_1283;	K10947	padR;	PadR	family	transcriptional	regulator,	regulatory	protein	PadR
D	lcl|SIZZ01000001.1_prot_TBR40167.1_1640;	K02171	blaI;	BlaI	family	transcriptional	regulator,	penicillinase	repressor
D	lcl|SIZZ01000001.1_prot_TBR40469.1_1970;	K03524	birA;	BirA	family	transcriptional	regulator,	biotin	operon	repressor	/	biotin---[acetyl-CoA-carboxylase]	ligase	[EC:6.3.4.15]
D	lcl|SIZZ01000002.1_prot_TBR36759.1_2494;	K03557	fis;	Fis	family	transcriptional	regulator,	factor	for	inversion	stimulation	protein
D	lcl|SIZZ01000002.1_prot_TBR37196.1_2964;	K10941	flrA,	fleQ,	flaK;	sigma-54	dependent	transcriptional	regulator,	flagellar	regulatory	protein
D	lcl|SIZZ01000001.1_prot_TBR40691.1_904;	K06714	rocR;	arginine	utilization	regulatory	protein
D	lcl|SIZZ01000001.1_prot_TBR40537.1_2047;	K07727	K07727;	putative	transcriptional	regulator
D	lcl|SIZZ01000003.1_prot_TBR36237.1_3300;	K07729	K07729;	putative	transcriptional	regulator
D	lcl|SIZZ01000001.1_prot_TBR40339.1_1828;	K03764	metJ;	MetJ	family	transcriptional	regulator,	methionine	regulon	repressor
D	lcl|SIZZ01000002.1_prot_TBR36664.1_2384;	K13821	putA;	RHH-type	transcriptional	regulator,	proline	utilization	regulon	repressor	/	proline	dehydrogenase	/	delta	1-pyrroline-5-carboxylate	dehydrogenase	[EC:1.5.5.2	1.2.1.88]
D	lcl|SIZZ01000001.1_prot_TBR38987.1_339;	K23239	frmR;	FrmR/RcnR	family	transcriptional	regulator,	repressor	of	frmRAB	operon
D	lcl|SIZZ01000004.1_prot_TBR35916.1_3583;	K03497	parB,	spo0J;	ParB	family	transcriptional	regulator,	chromosome	partitioning	protein
D	lcl|SIZZ01000001.1_prot_TBR39285.1_668;	K03705	hrcA;	heat-inducible	transcriptional	repressor
D	lcl|SIZZ01000001.1_prot_TBR40651.1_357;	K03567	gcvR;	glycine	cleavage	system	transcriptional	repressor
D	lcl|SIZZ01000001.1_prot_TBR39610.1_1032;	K06140	rnk;	regulator	of	nucleoside	diphosphate	kinase
D	lcl|SIZZ01000001.1_prot_TBR39912.1_1355;	K07734	paiB;	transcriptional	regulator
D	lcl|SIZZ01000001.1_prot_TBR40193.1_1668;	K07735	algH;	putative	transcriptional	regulator
D	lcl|SIZZ01000001.1_prot_TBR40725.1_1360;	K06204	dksA;	DnaK	suppressor	protein
D	lcl|SIZZ01000001.1_prot_TBR40255.1_1736;	K07738	nrdR;	transcriptional	repressor	NrdR
D	lcl|SIZZ01000004.1_prot_TBR35878.1_3545;	K14414	rtcR;	transcriptional	regulatory	protein	RtcR
D	lcl|SIZZ01000002.1_prot_TBR36973.1_2727;	K03925	mraZ;	transcriptional	regulator	MraZ
C	3021	Transcription	machinery	[BR:ko03021]
D	lcl|SIZZ01000001.1_prot_TBR38702.1_27;	K03040	rpoA;	DNA-directed	RNA	polymerase	subunit	alpha	[EC:2.7.7.6]
D	lcl|SIZZ01000005.1_prot_TBR35758.1_3667;	K03043	rpoB;	DNA-directed	RNA	polymerase	subunit	beta	[EC:2.7.7.6]
D	lcl|SIZZ01000005.1_prot_TBR35757.1_3666;	K03046	rpoC;	DNA-directed	RNA	polymerase	subunit	beta'	[EC:2.7.7.6]
D	lcl|SIZZ01000002.1_prot_TBR36876.1_2621;	K03060	rpoZ;	DNA-directed	RNA	polymerase	subunit	omega	[EC:2.7.7.6]
D	lcl|SIZZ01000002.1_prot_TBR36497.1_2204;	K03086	rpoD;	RNA	polymerase	primary	sigma	factor
D	lcl|SIZZ01000001.1_prot_TBR39000.1_352;	K03088	rpoE;	RNA	polymerase	sigma-70	factor,	ECF	subfamily
D	lcl|SIZZ01000001.1_prot_TBR39362.1_750;	K03088	rpoE;	RNA	polymerase	sigma-70	factor,	ECF	subfamily
D	lcl|SIZZ01000001.1_prot_TBR39479.1_886;	K03088	rpoE;	RNA	polymerase	sigma-70	factor,	ECF	subfamily
D	lcl|SIZZ01000001.1_prot_TBR39668.1_1092;	K03088	rpoE;	RNA	polymerase	sigma-70	factor,	ECF	subfamily
D	lcl|SIZZ01000001.1_prot_TBR40729.1_1427;	K03088	rpoE;	RNA	polymerase	sigma-70	factor,	ECF	subfamily
D	lcl|SIZZ01000001.1_prot_TBR39993.1_1441;	K03088	rpoE;	RNA	polymerase	sigma-70	factor,	ECF	subfamily
D	lcl|SIZZ01000001.1_prot_TBR40324.1_1812;	K03088	rpoE;	RNA	polymerase	sigma-70	factor,	ECF	subfamily
D	lcl|SIZZ01000002.1_prot_TBR36957.1_2709;	K03088	rpoE;	RNA	polymerase	sigma-70	factor,	ECF	subfamily
D	lcl|SIZZ01000003.1_prot_TBR36270.1_3336;	K03089	rpoH;	RNA	polymerase	sigma-32	factor
D	lcl|SIZZ01000002.1_prot_TBR37130.1_2897;	K03092	rpoN;	RNA	polymerase	sigma-54	factor
D	lcl|SIZZ01000002.1_prot_TBR37212.1_2983;	K02405	fliA,	whiG;	RNA	polymerase	sigma	factor	FliA
D	lcl|SIZZ01000001.1_prot_TBR40008.1_1460;	K03580	hepA;	ATP-dependent	helicase	HepA	[EC:5.6.2.-]
D	lcl|SIZZ01000001.1_prot_TBR39214.1_586;	K02600	nusA;	transcription	termination/antitermination	protein	NusA
D	lcl|SIZZ01000001.1_prot_TBR40248.1_1728;	K03625	nusB;	transcription	antitermination	protein	NusB
D	lcl|SIZZ01000005.1_prot_TBR35763.1_3672;	K02601	nusG;	transcription	termination/antitermination	protein	NusG
D	lcl|SIZZ01000001.1_prot_TBR40118.1_1584;	K03599	sspA,	mglA;	stringent	starvation	protein	A
D	lcl|SIZZ01000001.1_prot_TBR40745.1_1583;	K03600	sspB;	stringent	starvation	protein	B
D	lcl|SIZZ01000001.1_prot_TBR39667.1_1091;	K03597	rseA;	sigma-E	factor	negative	regulatory	protein	RseA
D	lcl|SIZZ01000001.1_prot_TBR40725.1_1360;	K06204	dksA;	DnaK	suppressor	protein
D	lcl|SIZZ01000001.1_prot_TBR39296.1_680;	K03624	greA;	transcription	elongation	factor	GreA
D	lcl|SIZZ01000001.1_prot_TBR38873.1_214;	K04760	greB;	transcription	elongation	factor	GreB
D	lcl|SIZZ01000003.1_prot_TBR36264.1_3329;	K03628	rho;	transcription	termination	factor	Rho
C	3019	Messenger	RNA	biogenesis	[BR:ko03019]
D	lcl|SIZZ01000001.1_prot_TBR39557.1_971;	K08300	rne;	ribonuclease	E	[EC:3.1.26.12]
D	lcl|SIZZ01000001.1_prot_TBR38712.1_37;	K08301	rng,	cafA;	ribonuclease	G	[EC:3.1.26.-]
D	lcl|SIZZ01000001.1_prot_TBR39662.1_1086;	K03685	rnc,	DROSHA,	RNT1;	ribonuclease	III	[EC:3.1.26.3]
D	lcl|SIZZ01000001.1_prot_TBR40635.1_179;	K12573	rnr,	vacB;	ribonuclease	R	[EC:3.1.13.1]
D	lcl|SIZZ01000001.1_prot_TBR39604.1_1024;	K13288	orn,	REX2,	REXO2;	oligoribonuclease	[EC:3.1.-.-]
D	lcl|SIZZ01000003.1_prot_TBR36266.1_3331;	K03732	rhlB;	ATP-dependent	RNA	helicase	RhlB	[EC:3.6.4.13]
D	lcl|SIZZ01000001.1_prot_TBR39959.1_1406;	K11927	rhlE;	ATP-dependent	RNA	helicase	RhlE	[EC:3.6.4.13]
D	lcl|SIZZ01000001.1_prot_TBR39964.1_1411;	K05592	deaD,	cshA;	ATP-dependent	RNA	helicase	DeaD	[EC:3.6.4.13]
D	lcl|SIZZ01000002.1_prot_TBR37151.1_2919;	K03654	recQ;	ATP-dependent	DNA	helicase	RecQ	[EC:5.6.2.4]
D	lcl|SIZZ01000001.1_prot_TBR39123.1_484;	K01689	ENO,	eno;	enolase	[EC:4.2.1.11]
D	lcl|SIZZ01000001.1_prot_TBR39219.1_591;	K00962	pnp,	PNPT1;	polyribonucleotide	nucleotidyltransferase	[EC:2.7.7.8]
D	lcl|SIZZ01000003.1_prot_TBR36264.1_3329;	K03628	rho;	transcription	termination	factor	Rho
D	lcl|SIZZ01000001.1_prot_TBR39287.1_670;	K04043	dnaK,	HSPA9;	molecular	chaperone	DnaK
D	lcl|SIZZ01000002.1_prot_TBR36772.1_2508;	K04077	groEL,	HSPD1;	chaperonin	GroEL
D	lcl|SIZZ01000001.1_prot_TBR38833.1_167;	K03666	hfq;	host	factor-I	protein
D	lcl|SIZZ01000001.1_prot_TBR38992.1_344;	K00937	ppk1;	polyphosphate	kinase	[EC:2.7.4.1]
D	lcl|SIZZ01000001.1_prot_TBR39711.1_1139;	K00937	ppk1;	polyphosphate	kinase	[EC:2.7.4.1]
D	lcl|SIZZ01000002.1_prot_TBR37259.1_3033;	K22468	ppk2;	polyphosphate	kinase	[EC:2.7.4.34]
D	lcl|SIZZ01000001.1_prot_TBR39010.1_363;	K00970	pcnB;	poly(A)	polymerase	[EC:2.7.7.19]
D	lcl|SIZZ01000002.1_prot_TBR36529.1_2236;	K08311	nudH;	putative	(di)nucleoside	polyphosphate	hydrolase	[EC:3.6.1.-]
D	lcl|SIZZ01000001.1_prot_TBR38986.1_337;	K03563	csrA;	carbon	storage	regulator
D	lcl|SIZZ01000002.1_prot_TBR37127.1_2894;	K06958	rapZ;	RNase	adapter	protein	RapZ
C	3041	Spliceosome	[BR:ko03041]
D	lcl|SIZZ01000001.1_prot_TBR39882.1_1324;	K12733	PPIL1;	peptidyl-prolyl	cis-trans	isomerase-like	1	[EC:5.2.1.8]
C	3011	Ribosome	[BR:ko03011]
D	lcl|SIZZ01000001.1_prot_TBR38763.1_90;	K02967	RP-S2,	MRPS2,	rpsB;	small	subunit	ribosomal	protein	S2
D	lcl|SIZZ01000001.1_prot_TBR38695.1_20;	K02988	RP-S5,	MRPS5,	rpsE;	small	subunit	ribosomal	protein	S5
D	lcl|SIZZ01000001.1_prot_TBR39939.1_1385;	K02990	RP-S6,	MRPS6,	rpsF;	small	subunit	ribosomal	protein	S6
D	lcl|SIZZ01000005.1_prot_TBR35755.1_3664;	K02992	RP-S7,	MRPS7,	rpsG;	small	subunit	ribosomal	protein	S7
D	lcl|SIZZ01000002.1_prot_TBR36847.1_2590;	K02996	RP-S9,	MRPS9,	rpsI;	small	subunit	ribosomal	protein	S9
D	lcl|SIZZ01000001.1_prot_TBR38677.1_2;	K02946	RP-S10,	MRPS10,	rpsJ;	small	subunit	ribosomal	protein	S10
D	lcl|SIZZ01000001.1_prot_TBR38700.1_25;	K02948	RP-S11,	MRPS11,	rpsK;	small	subunit	ribosomal	protein	S11
D	lcl|SIZZ01000005.1_prot_TBR35756.1_3665;	K02950	RP-S12,	MRPS12,	rpsL;	small	subunit	ribosomal	protein	S12
D	lcl|SIZZ01000001.1_prot_TBR38691.1_16;	K02954	RP-S14,	MRPS14,	rpsN;	small	subunit	ribosomal	protein	S14
D	lcl|SIZZ01000001.1_prot_TBR39218.1_590;	K02956	RP-S15,	MRPS15,	rpsO;	small	subunit	ribosomal	protein	S15
D	lcl|SIZZ01000001.1_prot_TBR39930.1_1376;	K02959	RP-S16,	MRPS16,	rpsP;	small	subunit	ribosomal	protein	S16
D	lcl|SIZZ01000001.1_prot_TBR38687.1_12;	K02961	RP-S17,	MRPS17,	rpsQ;	small	subunit	ribosomal	protein	S17
D	lcl|SIZZ01000001.1_prot_TBR39938.1_1384;	K02963	RP-S18,	MRPS18,	rpsR;	small	subunit	ribosomal	protein	S18
D	lcl|SIZZ01000002.1_prot_TBR36679.1_2401;	K02970	RP-S21,	MRPS21,	rpsU;	small	subunit	ribosomal	protein	S21
D	lcl|SIZZ01000005.1_prot_TBR35761.1_3670;	K02863	RP-L1,	MRPL1,	rplA;	large	subunit	ribosomal	protein	L1
D	lcl|SIZZ01000001.1_prot_TBR38681.1_6;	K02886	RP-L2,	MRPL2,	rplB;	large	subunit	ribosomal	protein	L2
D	lcl|SIZZ01000001.1_prot_TBR38678.1_3;	K02906	RP-L3,	MRPL3,	rplC;	large	subunit	ribosomal	protein	L3
D	lcl|SIZZ01000001.1_prot_TBR38679.1_4;	K02926	RP-L4,	MRPL4,	rplD;	large	subunit	ribosomal	protein	L4
D	lcl|SIZZ01000001.1_prot_TBR38690.1_15;	K02931	RP-L5,	MRPL5,	rplE;	large	subunit	ribosomal	protein	L5
D	lcl|SIZZ01000001.1_prot_TBR38693.1_18;	K02933	RP-L6,	MRPL6,	rplF;	large	subunit	ribosomal	protein	L6
D	lcl|SIZZ01000001.1_prot_TBR39937.1_1383;	K02939	RP-L9,	MRPL9,	rplI;	large	subunit	ribosomal	protein	L9
D	lcl|SIZZ01000005.1_prot_TBR35760.1_3669;	K02864	RP-L10,	MRPL10,	rplJ;	large	subunit	ribosomal	protein	L10
D	lcl|SIZZ01000005.1_prot_TBR35762.1_3671;	K02867	RP-L11,	MRPL11,	rplK;	large	subunit	ribosomal	protein	L11
D	lcl|SIZZ01000005.1_prot_TBR35759.1_3668;	K02935	RP-L7,	MRPL12,	rplL;	large	subunit	ribosomal	protein	L7/L12
D	lcl|SIZZ01000002.1_prot_TBR36846.1_2589;	K02871	RP-L13,	MRPL13,	rplM;	large	subunit	ribosomal	protein	L13
D	lcl|SIZZ01000001.1_prot_TBR38688.1_13;	K02874	RP-L14,	MRPL14,	rplN;	large	subunit	ribosomal	protein	L14
D	lcl|SIZZ01000001.1_prot_TBR38697.1_22;	K02876	RP-L15,	MRPL15,	rplO;	large	subunit	ribosomal	protein	L15
D	lcl|SIZZ01000001.1_prot_TBR38685.1_10;	K02878	RP-L16,	MRPL16,	rplP;	large	subunit	ribosomal	protein	L16
D	lcl|SIZZ01000001.1_prot_TBR38703.1_28;	K02879	RP-L17,	MRPL17,	rplQ;	large	subunit	ribosomal	protein	L17
D	lcl|SIZZ01000001.1_prot_TBR38694.1_19;	K02881	RP-L18,	MRPL18,	rplR;	large	subunit	ribosomal	protein	L18
D	lcl|SIZZ01000001.1_prot_TBR39927.1_1373;	K02884	RP-L19,	MRPL19,	rplS;	large	subunit	ribosomal	protein	L19
D	lcl|SIZZ01000001.1_prot_TBR40086.1_1546;	K02887	RP-L20,	MRPL20,	rplT;	large	subunit	ribosomal	protein	L20
D	lcl|SIZZ01000001.1_prot_TBR39030.1_385;	K02888	RP-L21,	MRPL21,	rplU;	large	subunit	ribosomal	protein	L21
D	lcl|SIZZ01000001.1_prot_TBR38683.1_8;	K02890	RP-L22,	MRPL22,	rplV;	large	subunit	ribosomal	protein	L22
D	lcl|SIZZ01000001.1_prot_TBR38680.1_5;	K02892	RP-L23,	MRPL23,	rplW;	large	subunit	ribosomal	protein	L23
D	lcl|SIZZ01000001.1_prot_TBR38689.1_14;	K02895	RP-L24,	MRPL24,	rplX;	large	subunit	ribosomal	protein	L24
D	lcl|SIZZ01000001.1_prot_TBR39031.1_386;	K02899	RP-L27,	MRPL27,	rpmA;	large	subunit	ribosomal	protein	L27
D	lcl|SIZZ01000002.1_prot_TBR36610.1_2324;	K02902	RP-L28,	MRPL28,	rpmB;	large	subunit	ribosomal	protein	L28
D	lcl|SIZZ01000001.1_prot_TBR39187.1_557;	K02911	RP-L32,	MRPL32,	rpmF;	large	subunit	ribosomal	protein	L32
D	lcl|SIZZ01000002.1_prot_TBR36609.1_2323;	K02913	RP-L33,	MRPL33,	rpmG;	large	subunit	ribosomal	protein	L33
D	lcl|SIZZ01000004.1_prot_TBR35873.1_3540;	K02914	RP-L34,	MRPL34,	rpmH;	large	subunit	ribosomal	protein	L34
D	lcl|SIZZ01000001.1_prot_TBR40087.1_1547;	K02916	RP-L35,	MRPL35,	rpmI;	large	subunit	ribosomal	protein	L35
D	lcl|SIZZ01000001.1_prot_TBR39297.1_681;	K02919	RP-L36,	MRPL36,	rpmJ;	large	subunit	ribosomal	protein	L36
D	lcl|SIZZ01000001.1_prot_TBR39303.1_687;	K02945	RP-S1,	rpsA;	small	subunit	ribosomal	protein	S1
D	lcl|SIZZ01000001.1_prot_TBR38684.1_9;	K02982	RP-S3,	rpsC;	small	subunit	ribosomal	protein	S3
D	lcl|SIZZ01000001.1_prot_TBR38701.1_26;	K02986	RP-S4,	rpsD;	small	subunit	ribosomal	protein	S4
D	lcl|SIZZ01000001.1_prot_TBR38692.1_17;	K02994	RP-S8,	rpsH;	small	subunit	ribosomal	protein	S8
D	lcl|SIZZ01000001.1_prot_TBR38699.1_24;	K02952	RP-S13,	rpsM;	small	subunit	ribosomal	protein	S13
D	lcl|SIZZ01000001.1_prot_TBR38682.1_7;	K02965	RP-S19,	rpsS;	small	subunit	ribosomal	protein	S19
D	lcl|SIZZ01000001.1_prot_TBR39035.1_391;	K02968	RP-S20,	rpsT;	small	subunit	ribosomal	protein	S20
D	lcl|SIZZ01000002.1_prot_TBR37265.1_3041;	K02897	RP-L25,	rplY;	large	subunit	ribosomal	protein	L25
D	lcl|SIZZ01000001.1_prot_TBR38686.1_11;	K02904	RP-L29,	rpmC;	large	subunit	ribosomal	protein	L29
D	lcl|SIZZ01000002.1_prot_TBR36881.1_2626;	K02909	RP-L31,	rpmE;	large	subunit	ribosomal	protein	L31
C	3009	Ribosome	biogenesis	[BR:ko03009]
D	lcl|SIZZ01000001.1_prot_TBR39662.1_1086;	K03685	rnc,	DROSHA,	RNT1;	ribonuclease	III	[EC:3.1.26.3]
D	lcl|SIZZ01000001.1_prot_TBR39604.1_1024;	K13288	orn,	REX2,	REXO2;	oligoribonuclease	[EC:3.1.-.-]
D	lcl|SIZZ01000001.1_prot_TBR40706.1_1085;	K03595	era,	ERAL1;	GTPase
D	lcl|SIZZ01000001.1_prot_TBR39032.1_387;	K03979	obgE,	cgtA,	MTG2;	GTPase	[EC:3.6.5.-]
D	lcl|SIZZ01000001.1_prot_TBR40725.1_1360;	K06204	dksA;	DnaK	suppressor	protein
D	lcl|SIZZ01000001.1_prot_TBR39214.1_586;	K02600	nusA;	transcription	termination/antitermination	protein	NusA
D	lcl|SIZZ01000001.1_prot_TBR40248.1_1728;	K03625	nusB;	transcription	antitermination	protein	NusB
D	lcl|SIZZ01000005.1_prot_TBR35763.1_3672;	K02601	nusG;	transcription	termination/antitermination	protein	NusG
D	lcl|SIZZ01000001.1_prot_TBR38934.1_278;	K06183	rsuA;	16S	rRNA	pseudouridine516	synthase	[EC:5.4.99.19]
D	lcl|SIZZ01000002.1_prot_TBR36992.1_2747;	K02528	ksgA;	16S	rRNA	(adenine1518-N6/adenine1519-N6)-dimethyltransferase	[EC:2.1.1.182]
D	lcl|SIZZ01000002.1_prot_TBR36510.1_2217;	K03500	rsmB,	sun;	16S	rRNA	(cytosine967-C5)-methyltransferase	[EC:2.1.1.176]
D	lcl|SIZZ01000001.1_prot_TBR38933.1_277;	K00564	rsmC;	16S	rRNA	(guanine1207-N2)-methyltransferase	[EC:2.1.1.172]
D	lcl|SIZZ01000002.1_prot_TBR37163.1_2931;	K08316	rsmD;	16S	rRNA	(guanine966-N2)-methyltransferase	[EC:2.1.1.171]
D	lcl|SIZZ01000001.1_prot_TBR40184.1_1657;	K09761	rsmE;	16S	rRNA	(uracil1498-N3)-methyltransferase	[EC:2.1.1.193]
D	lcl|SIZZ01000004.1_prot_TBR35914.1_3581;	K03501	gidB,	rsmG;	16S	rRNA	(guanine527-N7)-methyltransferase	[EC:2.1.1.170]
D	lcl|SIZZ01000002.1_prot_TBR36974.1_2728;	K03438	mraW,	rsmH;	16S	rRNA	(cytosine1402-N4)-methyltransferase	[EC:2.1.1.199]
D	lcl|SIZZ01000002.1_prot_TBR36972.1_2726;	K07056	rsmI;	16S	rRNA	(cytidine1402-2'-O)-methyltransferase	[EC:2.1.1.198]
D	lcl|SIZZ01000001.1_prot_TBR38843.1_180;	K03218	rlmB;	23S	rRNA	(guanosine2251-2'-O)-methyltransferase	[EC:2.1.1.185]
D	lcl|SIZZ01000001.1_prot_TBR39135.1_497;	K02427	rlmE,	rrmJ,	ftsJ;	23S	rRNA	(uridine2552-2'-O)-methyltransferase	[EC:2.1.1.166]
D	lcl|SIZZ01000001.1_prot_TBR39975.1_1422;	K00783	rlmH;	23S	rRNA	(pseudouridine1915-N3)-methyltransferase	[EC:2.1.1.177]
D	lcl|SIZZ01000002.1_prot_TBR36706.1_2435;	K06969	rlmI;	23S	rRNA	(cytosine1962-C5)-methyltransferase	[EC:2.1.1.191]
D	lcl|SIZZ01000001.1_prot_TBR39860.1_1300;	K07115	rlmJ;	23S	rRNA	(adenine2030-N6)-methyltransferase	[EC:2.1.1.266]
D	lcl|SIZZ01000001.1_prot_TBR38816.1_148;	K12297	rlmKL;	23S	rRNA	(guanine2069-N7)-methyltransferase	/	23S	rRNA	(guanine2445-N2)-methyltransferase	[EC:2.1.1.264	2.1.1.173]
D	lcl|SIZZ01000001.1_prot_TBR39320.1_705;	K06941	rlmN;	23S	rRNA	(adenine2503-C2)-methyltransferase	[EC:2.1.1.192]
D	lcl|SIZZ01000001.1_prot_TBR39657.1_1080;	K03215	rumA;	23S	rRNA	(uracil1939-C5)-methyltransferase	[EC:2.1.1.190]
D	lcl|SIZZ01000001.1_prot_TBR38932.1_276;	K06177	rluA;	tRNA	pseudouridine32	synthase	/	23S	rRNA	pseudouridine746	synthase	[EC:5.4.99.28	5.4.99.29]
D	lcl|SIZZ01000001.1_prot_TBR39582.1_998;	K06178	rluB;	23S	rRNA	pseudouridine2605	synthase	[EC:5.4.99.22]
D	lcl|SIZZ01000001.1_prot_TBR39861.1_1301;	K06178	rluB;	23S	rRNA	pseudouridine2605	synthase	[EC:5.4.99.22]
D	lcl|SIZZ01000001.1_prot_TBR39556.1_970;	K06179	rluC;	23S	rRNA	pseudouridine955/2504/2580	synthase	[EC:5.4.99.24]
D	lcl|SIZZ01000002.1_prot_TBR37034.1_2790;	K06180	rluD;	23S	rRNA	pseudouridine1911/1915/1917	synthase	[EC:5.4.99.23]
D	lcl|SIZZ01000002.1_prot_TBR36633.1_2348;	K06181	rluE;	23S	rRNA	pseudouridine2457	synthase	[EC:5.4.99.20]
D	lcl|SIZZ01000003.1_prot_TBR36228.1_3291;	K06182	rluF;	23S	rRNA	pseudouridine2604	synthase	[EC:5.4.99.21]
D	lcl|SIZZ01000001.1_prot_TBR40216.1_1692;	K03789	rimI;	[ribosomal	protein	S18]-alanine	N-acetyltransferase	[EC:2.3.1.266]
D	lcl|SIZZ01000001.1_prot_TBR38878.1_220;	K03790	rimJ;	[ribosomal	protein	S5]-alanine	N-acetyltransferase	[EC:2.3.1.267]
D	lcl|SIZZ01000001.1_prot_TBR39961.1_1408;	K03790	rimJ;	[ribosomal	protein	S5]-alanine	N-acetyltransferase	[EC:2.3.1.267]
D	lcl|SIZZ01000002.1_prot_TBR36929.1_2681;	K05844	rimK;	ribosomal	protein	S6--L-glutamate	ligase	[EC:6.3.2.-]
D	lcl|SIZZ01000001.1_prot_TBR39327.1_712;	K03817	rimL;	ribosomal-protein-serine	acetyltransferase	[EC:2.3.1.-]
D	lcl|SIZZ01000001.1_prot_TBR39929.1_1375;	K02860	rimM;	16S	rRNA	processing	protein	RimM
D	lcl|SIZZ01000001.1_prot_TBR38871.1_210;	K14441	rimO;	ribosomal	protein	S12	methylthiotransferase	[EC:2.8.4.4]
D	lcl|SIZZ01000002.1_prot_TBR36761.1_2496;	K02687	prmA;	ribosomal	protein	L11	methyltransferase	[EC:2.1.1.-]
D	lcl|SIZZ01000001.1_prot_TBR38877.1_219;	K07320	prmB;	ribosomal	protein	L3	glutamine	methyltransferase	[EC:2.1.1.298]
D	lcl|SIZZ01000001.1_prot_TBR39236.1_608;	K18850	ycfD;	50S	ribosomal	protein	L16	3-hydroxylase	[EC:1.14.11.47]
D	lcl|SIZZ01000001.1_prot_TBR39557.1_971;	K08300	rne;	ribonuclease	E	[EC:3.1.26.12]
D	lcl|SIZZ01000001.1_prot_TBR38712.1_37;	K08301	rng,	cafA;	ribonuclease	G	[EC:3.1.26.-]
D	lcl|SIZZ01000001.1_prot_TBR40194.1_1669;	K07447	ruvX;	putative	pre-16S	rRNA	nuclease	[EC:3.1.-.-]
D	lcl|SIZZ01000001.1_prot_TBR39964.1_1411;	K05592	deaD,	cshA;	ATP-dependent	RNA	helicase	DeaD	[EC:3.6.4.13]
D	lcl|SIZZ01000003.1_prot_TBR36226.1_3289;	K05591	dbpA;	ATP-dependent	RNA	helicase	DbpA	[EC:3.6.4.13]
D	lcl|SIZZ01000001.1_prot_TBR40483.1_1987;	K06949	rsgA,	engC;	ribosome	biogenesis	GTPase	/	thiamine	phosphate	phosphatase	[EC:3.6.1.-	3.1.3.100]
D	lcl|SIZZ01000002.1_prot_TBR36778.1_2515;	K06949	rsgA,	engC;	ribosome	biogenesis	GTPase	/	thiamine	phosphate	phosphatase	[EC:3.6.1.-	3.1.3.100]
D	lcl|SIZZ01000001.1_prot_TBR39325.1_710;	K03977	engA,	der;	GTPase
D	lcl|SIZZ01000001.1_prot_TBR38834.1_168;	K03665	hflX;	GTPase
D	lcl|SIZZ01000002.1_prot_TBR36516.1_2223;	K07566	tsaC,	rimN,	SUA5;	L-threonylcarbamoyladenylate	synthase	[EC:2.7.7.87]
D	lcl|SIZZ01000002.1_prot_TBR36877.1_2622;	K01139	spoT;	GTP	diphosphokinase	/	guanosine-3',5'-bis(diphosphate)	3'-diphosphatase	[EC:2.7.6.5	3.1.7.2]
D	lcl|SIZZ01000001.1_prot_TBR39216.1_588;	K02834	rbfA;	ribosome-binding	factor	A
D	lcl|SIZZ01000001.1_prot_TBR39213.1_585;	K09748	rimP;	ribosome	maturation	factor	RimP
D	lcl|SIZZ01000001.1_prot_TBR39976.1_1423;	K09710	ybeB;	ribosome-associated	protein
D	lcl|SIZZ01000001.1_prot_TBR40128.1_1596;	K07042	ybeY,	yqfG;	probable	rRNA	maturation	factor
D	lcl|SIZZ01000001.1_prot_TBR39134.1_496;	K07574	yhbY;	RNA-binding	protein
D	lcl|SIZZ01000001.1_prot_TBR38739.1_64;	K09889	yjgA;	ribosome-associated	protein
D	lcl|SIZZ01000002.1_prot_TBR37129.1_2896;	K05808	yhbH;	putative	sigma-54	modulation	protein
D	lcl|SIZZ01000002.1_prot_TBR37267.1_3043;	K06942	ychF;	ribosome-binding	ATPase
C	3016	Transfer	RNA	biogenesis	[BR:ko03016]
D	lcl|SIZZ01000002.1_prot_TBR36687.1_2413;	K00974	cca;	tRNA	nucleotidyltransferase	(CCA-adding	enzyme)	[EC:2.7.7.72	3.1.3.-	3.1.4.-]
D	lcl|SIZZ01000004.1_prot_TBR35879.1_3546;	K14415	RTCB,	rtcB;	tRNA-splicing	ligase	RtcB	(3'-phosphate/5'-hydroxy	nucleic	acid	ligase)	[EC:6.5.1.8]
D	lcl|SIZZ01000001.1_prot_TBR38895.1_237;	K01885	EARS,	gltX;	glutamyl-tRNA	synthetase	[EC:6.1.1.17]
D	lcl|SIZZ01000001.1_prot_TBR40220.1_1696;	K01881	PARS,	proS;	prolyl-tRNA	synthetase	[EC:6.1.1.15]
D	lcl|SIZZ01000001.1_prot_TBR39038.1_394;	K01870	IARS,	ileS;	isoleucyl-tRNA	synthetase	[EC:6.1.1.5]
D	lcl|SIZZ01000001.1_prot_TBR39985.1_1433;	K01869	LARS,	leuS;	leucyl-tRNA	synthetase	[EC:6.1.1.4]
D	lcl|SIZZ01000001.1_prot_TBR38858.1_196;	K01874	MARS,	metG;	methionyl-tRNA	synthetase	[EC:6.1.1.10]
D	lcl|SIZZ01000002.1_prot_TBR37074.1_2837;	K01886	QARS,	glnS;	glutaminyl-tRNA	synthetase	[EC:6.1.1.18]
D	lcl|SIZZ01000004.1_prot_TBR35787.1_3447;	K01887	RARS,	argS;	arginyl-tRNA	synthetase	[EC:6.1.1.19]
D	lcl|SIZZ01000001.1_prot_TBR39535.1_947;	K04567	KARS,	lysS;	lysyl-tRNA	synthetase,	class	II	[EC:6.1.1.6]
D	lcl|SIZZ01000002.1_prot_TBR37051.1_2811;	K01876	DARS2,	aspS;	aspartyl-tRNA	synthetase	[EC:6.1.1.12]
D	lcl|SIZZ01000001.1_prot_TBR38985.1_336;	K01872	AARS,	alaS;	alanyl-tRNA	synthetase	[EC:6.1.1.7]
D	lcl|SIZZ01000001.1_prot_TBR39941.1_1387;	K01893	NARS,	asnS;	asparaginyl-tRNA	synthetase	[EC:6.1.1.22]
D	lcl|SIZZ01000001.1_prot_TBR40089.1_1549;	K01868	TARS,	thrS;	threonyl-tRNA	synthetase	[EC:6.1.1.3]
D	lcl|SIZZ01000001.1_prot_TBR39622.1_1045;	K01875	SARS,	serS;	seryl-tRNA	synthetase	[EC:6.1.1.11]
D	lcl|SIZZ01000001.1_prot_TBR39915.1_1358;	K01883	CARS,	cysS;	cysteinyl-tRNA	synthetase	[EC:6.1.1.16]
D	lcl|SIZZ01000001.1_prot_TBR40214.1_1690;	K01873	VARS,	valS;	valyl-tRNA	synthetase	[EC:6.1.1.9]
D	lcl|SIZZ01000001.1_prot_TBR39097.1_458;	K01892	HARS,	hisS;	histidyl-tRNA	synthetase	[EC:6.1.1.21]
D	lcl|SIZZ01000001.1_prot_TBR40085.1_1545;	K01889	FARSA,	pheS;	phenylalanyl-tRNA	synthetase	alpha	chain	[EC:6.1.1.20]
D	lcl|SIZZ01000001.1_prot_TBR40084.1_1544;	K01890	FARSB,	pheT;	phenylalanyl-tRNA	synthetase	beta	chain	[EC:6.1.1.20]
D	lcl|SIZZ01000004.1_prot_TBR35776.1_3434;	K01866	YARS,	tyrS;	tyrosyl-tRNA	synthetase	[EC:6.1.1.1]
D	lcl|SIZZ01000001.1_prot_TBR40464.1_1965;	K01867	WARS,	trpS;	tryptophanyl-tRNA	synthetase	[EC:6.1.1.2]
D	lcl|SIZZ01000002.1_prot_TBR36498.1_2205;	K07560	dtd,	DTD;	D-aminoacyl-tRNA	deacylase	[EC:3.1.1.96]
D	lcl|SIZZ01000002.1_prot_TBR36924.1_2675;	K03439	trmB,	METTL1,	TRM8;	tRNA	(guanine-N7-)-methyltransferase	[EC:2.1.1.33]
D	lcl|SIZZ01000001.1_prot_TBR38884.1_226;	K06173	truA,	PUS1;	tRNA	pseudouridine38-40	synthase	[EC:5.4.99.12]
D	lcl|SIZZ01000001.1_prot_TBR39217.1_589;	K03177	truB,	PUS4,	TRUB1;	tRNA	pseudouridine55	synthase	[EC:5.4.99.25]
D	lcl|SIZZ01000001.1_prot_TBR39127.1_489;	K06176	truD,	PUS7;	tRNA	pseudouridine13	synthase	[EC:5.4.99.27]
D	lcl|SIZZ01000002.1_prot_TBR37295.1_2402;	K01409	KAE1,	tsaD,	QRI7;	N6-L-threonylcarbamoyladenine	synthase	[EC:2.3.1.234]
D	lcl|SIZZ01000002.1_prot_TBR36516.1_2223;	K07566	tsaC,	rimN,	SUA5;	L-threonylcarbamoyladenylate	synthase	[EC:2.7.7.87]
D	lcl|SIZZ01000001.1_prot_TBR38832.1_166;	K00791	miaA,	TRIT1;	tRNA	dimethylallyltransferase	[EC:2.5.1.75]
D	lcl|SIZZ01000004.1_prot_TBR35876.1_3543;	K03650	mnmE,	trmE,	MSS1;	tRNA	modification	GTPase	[EC:3.6.-.-]
D	lcl|SIZZ01000003.1_prot_TBR36028.1_3063;	K03495	gidA,	mnmG,	MTO1;	tRNA	uridine	5-carboxymethylaminomethyl	modification	enzyme
D	lcl|SIZZ01000001.1_prot_TBR40178.1_1651;	K01082	cysQ,	MET22,	BPNT1;	3'(2'),	5'-bisphosphate	nucleotidase	[EC:3.1.3.7]
D	lcl|SIZZ01000004.1_prot_TBR35874.1_3541;	K03536	rnpA;	ribonuclease	P	protein	component	[EC:3.1.26.5]
D	lcl|SIZZ01000001.1_prot_TBR38850.1_188;	K03683	rnt;	ribonuclease	T	[EC:3.1.13.-]
D	lcl|SIZZ01000002.1_prot_TBR36867.1_2612;	K00989	rph;	ribonuclease	PH	[EC:2.7.7.56]
D	lcl|SIZZ01000001.1_prot_TBR39694.1_1120;	K03684	rnd;	ribonuclease	D	[EC:3.1.13.5]
D	lcl|SIZZ01000001.1_prot_TBR40260.1_1742;	K06020	ettA;	energy-dependent	translational	throttle	protein	EttA
D	lcl|SIZZ01000003.1_prot_TBR36020.1_3055;	K01878	glyQ;	glycyl-tRNA	synthetase	alpha	chain	[EC:6.1.1.14]
D	lcl|SIZZ01000003.1_prot_TBR36021.1_3056;	K01879	glyS;	glycyl-tRNA	synthetase	beta	chain	[EC:6.1.1.14]
D	lcl|SIZZ01000001.1_prot_TBR38974.1_324;	K01894	gluQ;	glutamyl-Q	tRNA(Asp)	synthetase	[EC:6.1.1.-]
D	lcl|SIZZ01000001.1_prot_TBR39331.1_716;	K11991	tadA;	tRNA(adenine34)	deaminase	[EC:3.5.4.33]
D	lcl|SIZZ01000001.1_prot_TBR40475.1_1976;	K05539	dusA;	tRNA-dihydrouridine	synthase	A	[EC:1.-.-.-]
D	lcl|SIZZ01000002.1_prot_TBR36948.1_2700;	K05540	dusB;	tRNA-dihydrouridine	synthase	B	[EC:1.-.-.-]
D	lcl|SIZZ01000001.1_prot_TBR40123.1_1590;	K06168	miaB;	tRNA-2-methylthio-N6-dimethylallyladenosine	synthase	[EC:2.8.4.3]
D	lcl|SIZZ01000001.1_prot_TBR39928.1_1374;	K00554	trmD;	tRNA	(guanine37-N1)-methyltransferase	[EC:2.1.1.228]
D	lcl|SIZZ01000002.1_prot_TBR37145.1_2913;	K15396	trmJ;	tRNA	(cytidine32/uridine32-2'-O)-methyltransferase	[EC:2.1.1.200]
D	lcl|SIZZ01000002.1_prot_TBR36569.1_2281;	K03216	trmL,	cspR;	tRNA	(cytidine/uridine-2'-O-)-methyltransferase	[EC:2.1.1.207]
D	lcl|SIZZ01000002.1_prot_TBR36566.1_2278;	K06175	truC;	tRNA	pseudouridine65	synthase	[EC:5.4.99.26]
D	lcl|SIZZ01000001.1_prot_TBR38932.1_276;	K06177	rluA;	tRNA	pseudouridine32	synthase	/	23S	rRNA	pseudouridine746	synthase	[EC:5.4.99.28	5.4.99.29]
D	lcl|SIZZ01000001.1_prot_TBR39573.1_987;	K00566	mnmA,	trmU;	tRNA-uridine	2-sulfurtransferase	[EC:2.8.1.13]
D	lcl|SIZZ01000002.1_prot_TBR36580.1_2292;	K14058	ttcA;	tRNA	2-thiocytidine	biosynthesis	protein	TtcA
D	lcl|SIZZ01000001.1_prot_TBR39940.1_1386;	K13628	iscA;	iron-sulfur	cluster	assembly	protein
D	lcl|SIZZ01000001.1_prot_TBR40663.1_523;	K06980	ygfZ;	tRNA-modifying	protein	YgfZ
D	lcl|SIZZ01000001.1_prot_TBR40061.1_1519;	K07568	queA;	S-adenosylmethionine:tRNA	ribosyltransferase-isomerase	[EC:2.4.99.17]
D	lcl|SIZZ01000002.1_prot_TBR37064.1_2826;	K06920	queC;	7-cyano-7-deazaguanine	synthase	[EC:6.3.4.20]
D	lcl|SIZZ01000002.1_prot_TBR36530.1_2237;	K01737	queD,	ptpS,	PTS;	6-pyruvoyltetrahydropterin/6-carboxytetrahydropterin	synthase	[EC:4.2.3.12	4.1.2.50]
D	lcl|SIZZ01000002.1_prot_TBR37063.1_2825;	K10026	queE;	7-carboxy-7-deazaguanine	synthase	[EC:4.3.99.3]
D	lcl|SIZZ01000003.1_prot_TBR36193.1_3252;	K06879	queF;	7-cyano-7-deazaguanine	reductase	[EC:1.7.1.13]
D	lcl|SIZZ01000001.1_prot_TBR39016.1_369;	K18979	queG;	epoxyqueuosine	reductase	[EC:1.17.99.6]
D	lcl|SIZZ01000001.1_prot_TBR40060.1_1518;	K00773	tgt;	queuine	tRNA-ribosyltransferase	[EC:2.4.2.29]
D	lcl|SIZZ01000001.1_prot_TBR40624.1_70;	K04075	tilS,	mesJ;	tRNA(Ile)-lysidine	synthase	[EC:6.3.4.19]
D	lcl|SIZZ01000002.1_prot_TBR37121.1_2888;	K14742	tsaB;	tRNA	threonylcarbamoyladenosine	biosynthesis	protein	TsaB
D	lcl|SIZZ01000001.1_prot_TBR39017.1_371;	K06925	tsaE;	tRNA	threonylcarbamoyladenosine	biosynthesis	protein	TsaE
D	lcl|SIZZ01000001.1_prot_TBR38972.1_322;	K22132	tcdA;	tRNA	threonylcarbamoyladenosine	dehydratase
D	lcl|SIZZ01000001.1_prot_TBR40635.1_179;	K12573	rnr,	vacB;	ribonuclease	R	[EC:3.1.13.1]
D	lcl|SIZZ01000001.1_prot_TBR39219.1_591;	K00962	pnp,	PNPT1;	polyribonucleotide	nucleotidyltransferase	[EC:2.7.7.8]
C	3012	Translation	factors	[BR:ko03012]
D	lcl|SIZZ01000001.1_prot_TBR39215.1_587;	K02519	infB,	MTIF2;	translation	initiation	factor	IF-2
D	lcl|SIZZ01000001.1_prot_TBR40088.1_1548;	K02520	infC,	MTIF3;	translation	initiation	factor	IF-3
D	lcl|SIZZ01000001.1_prot_TBR39546.1_959;	K06158	ABCF3;	ATP-binding	cassette,	subfamily	F,	member	3
D	lcl|SIZZ01000001.1_prot_TBR38762.1_89;	K02357	tsf,	TSFM;	elongation	factor	Ts
D	lcl|SIZZ01000007.1_prot_TBR35750.1_3675;	K02358	tuf,	TUFM;	elongation	factor	Tu
D	lcl|SIZZ01000002.1_prot_TBR37092.1_2855;	K02355	fusA,	GFM,	EFG;	elongation	factor	G
D	lcl|SIZZ01000005.1_prot_TBR35754.1_3663;	K02355	fusA,	GFM,	EFG;	elongation	factor	G
D	lcl|SIZZ01000002.1_prot_TBR37261.1_3035;	K02835	prfA,	MTRF1,	MRF1;	peptide	chain	release	factor	1
D	lcl|SIZZ01000001.1_prot_TBR38759.1_86;	K02838	frr,	MRRF,	RRF;	ribosome	recycling	factor
D	lcl|SIZZ01000002.1_prot_TBR37082.1_2845;	K02493	hemK,	prmC,	HEMK;	release	factor	glutamine	methyltransferase	[EC:2.1.1.297]
D	lcl|SIZZ01000002.1_prot_TBR37266.1_3042;	K01056	PTH1,	pth,	spoVC;	peptidyl-tRNA	hydrolase,	PTH1	family	[EC:3.1.1.29]
D	lcl|SIZZ01000001.1_prot_TBR39569.1_983;	K02518	infA;	translation	initiation	factor	IF-1
D	lcl|SIZZ01000001.1_prot_TBR39896.1_1339;	K02356	efp;	elongation	factor	P
D	lcl|SIZZ01000001.1_prot_TBR39925.1_1370;	K02356	efp;	elongation	factor	P
D	lcl|SIZZ01000001.1_prot_TBR40704.1_1030;	K04568	epmA,	poxA;	elongation	factor	P--(R)-beta-lysine	ligase	[EC:6.3.1.-]
D	lcl|SIZZ01000001.1_prot_TBR39926.1_1371;	K19810	epmB;	L-lysine	2,3-aminomutase	[EC:5.4.3.-]
D	lcl|SIZZ01000001.1_prot_TBR39536.1_948;	K02836	prfB;	peptide	chain	release	factor	2
D	lcl|SIZZ01000001.1_prot_TBR40313.1_1801;	K02837	prfC;	peptide	chain	release	factor	3
D	lcl|SIZZ01000002.1_prot_TBR36565.1_2277;	K15034	yaeJ;	ribosome-associated	protein
C	3110	Chaperones	and	folding	catalysts	[BR:ko03110]
D	lcl|SIZZ01000001.1_prot_TBR39570.1_984;	K03694	clpA;	ATP-dependent	Clp	protease	ATP-binding	subunit	ClpA
D	lcl|SIZZ01000002.1_prot_TBR37038.1_2795;	K03695	clpB;	ATP-dependent	Clp	protease	ATP-binding	subunit	ClpB
D	lcl|SIZZ01000001.1_prot_TBR39690.1_1116;	K03544	clpX,	CLPX;	ATP-dependent	Clp	protease	ATP-binding	subunit	ClpX
D	lcl|SIZZ01000004.1_prot_TBR35885.1_3552;	K03667	hslU;	ATP-dependent	HslUV	protease	ATP-binding	subunit	HslU
D	lcl|SIZZ01000001.1_prot_TBR38976.1_326;	K04079	HSP90A,	htpG;	molecular	chaperone	HtpG
D	lcl|SIZZ01000001.1_prot_TBR39287.1_670;	K04043	dnaK,	HSPA9;	molecular	chaperone	DnaK
D	lcl|SIZZ01000001.1_prot_TBR39815.1_1255;	K04045	hscC;	molecular	chaperone	HscC
D	lcl|SIZZ01000002.1_prot_TBR36772.1_2508;	K04077	groEL,	HSPD1;	chaperonin	GroEL
D	lcl|SIZZ01000001.1_prot_TBR39289.1_672;	K03686	dnaJ;	molecular	chaperone	DnaJ
D	lcl|SIZZ01000001.1_prot_TBR39228.1_600;	K05516	cbpA;	curved	DNA-binding	protein
D	lcl|SIZZ01000002.1_prot_TBR36814.1_2555;	K05801	djlA;	DnaJ	like	chaperone	protein
D	lcl|SIZZ01000001.1_prot_TBR40329.1_1818;	K04083	hslO;	molecular	chaperone	Hsp33
D	lcl|SIZZ01000001.1_prot_TBR39286.1_669;	K03687	GRPE;	molecular	chaperone	GrpE
D	lcl|SIZZ01000001.1_prot_TBR39227.1_599;	K13993	HSP20;	HSP20	family	protein
D	lcl|SIZZ01000001.1_prot_TBR38977.1_328;	K04762	hslR;	ribosome-associated	heat	shock	protein	Hsp15
D	lcl|SIZZ01000002.1_prot_TBR36771.1_2507;	K04078	groES,	HSPE1;	chaperonin	GroES
D	lcl|SIZZ01000001.1_prot_TBR39666.1_1090;	K04771	degP,	htrA;	serine	protease	Do	[EC:3.4.21.107]
D	lcl|SIZZ01000001.1_prot_TBR40603.1_2114;	K04771	degP,	htrA;	serine	protease	Do	[EC:3.4.21.107]
D	lcl|SIZZ01000001.1_prot_TBR40659.1_498;	K03798	ftsH,	hflB;	cell	division	protease	FtsH	[EC:3.4.24.-]
D	lcl|SIZZ01000002.1_prot_TBR36533.1_2240;	K02108	ATPF0A,	atpB;	F-type	H+-transporting	ATPase	subunit	a
D	lcl|SIZZ01000001.1_prot_TBR39593.1_1012;	K07346	fimC;	fimbrial	chaperone	protein
D	lcl|SIZZ01000002.1_prot_TBR36611.1_2325;	K03071	secB;	preprotein	translocase	subunit	SecB
D	lcl|SIZZ01000001.1_prot_TBR38803.1_133;	K09796	pccA;	periplasmic	copper	chaperone	A
D	lcl|SIZZ01000001.1_prot_TBR39481.1_888;	K01342	aprE;	subtilisin	[EC:3.4.21.62]
D	lcl|SIZZ01000003.1_prot_TBR36374.1_3178;	K12373	HEXA_B;	hexosaminidase	[EC:3.2.1.52]
D	lcl|SIZZ01000001.1_prot_TBR38990.1_342;	K03767	PPIA;	peptidyl-prolyl	cis-trans	isomerase	A	(cyclophilin	A)	[EC:5.2.1.8]
D	lcl|SIZZ01000001.1_prot_TBR39882.1_1324;	K12733	PPIL1;	peptidyl-prolyl	cis-trans	isomerase-like	1	[EC:5.2.1.8]
D	lcl|SIZZ01000001.1_prot_TBR39687.1_1113;	K03770	ppiD;	peptidyl-prolyl	cis-trans	isomerase	D	[EC:5.2.1.8]
D	lcl|SIZZ01000001.1_prot_TBR39675.1_1099;	K03772	fkpA;	FKBP-type	peptidyl-prolyl	cis-trans	isomerase	FkpA	[EC:5.2.1.8]
D	lcl|SIZZ01000001.1_prot_TBR39022.1_376;	K03773	fklB;	FKBP-type	peptidyl-prolyl	cis-trans	isomerase	FklB	[EC:5.2.1.8]
D	lcl|SIZZ01000001.1_prot_TBR38963.1_309;	K03775	slyD;	FKBP-type	peptidyl-prolyl	cis-trans	isomerase	SlyD	[EC:5.2.1.8]
D	lcl|SIZZ01000002.1_prot_TBR36994.1_2749;	K03771	surA;	peptidyl-prolyl	cis-trans	isomerase	SurA	[EC:5.2.1.8]
D	lcl|SIZZ01000003.1_prot_TBR36265.1_3330;	K03671	trxA;	thioredoxin	1
D	lcl|SIZZ01000001.1_prot_TBR38936.1_280;	K03672	trxC;	thioredoxin	2	[EC:1.8.1.8]
D	lcl|SIZZ01000001.1_prot_TBR39990.1_1438;	K05838	ybbN;	putative	thioredoxin
D	lcl|SIZZ01000001.1_prot_TBR38996.1_348;	K03676	grxC,	GLRX,	GLRX2;	glutaredoxin	3
D	lcl|SIZZ01000001.1_prot_TBR40110.1_1575;	K07390	grxD,	GLRX5;	monothiol	glutaredoxin
D	lcl|SIZZ01000002.1_prot_TBR36775.1_2511;	K07390	grxD,	GLRX5;	monothiol	glutaredoxin
D	lcl|SIZZ01000003.1_prot_TBR36252.1_3317;	K03673	dsbA;	protein	dithiol	oxidoreductase	(disulfide-forming)	[EC:1.8.4.15]
D	lcl|SIZZ01000003.1_prot_TBR36253.1_3318;	K03673	dsbA;	protein	dithiol	oxidoreductase	(disulfide-forming)	[EC:1.8.4.15]
D	lcl|SIZZ01000001.1_prot_TBR38704.1_29;	K03611	dsbB;	protein	dithiol:quinone	oxidoreductase	[EC:1.8.5.9]
D	lcl|SIZZ01000001.1_prot_TBR40282.1_1767;	K03981	dsbC;	thiol:disulfide	interchange	protein	DsbC	[EC:5.3.4.1]
D	lcl|SIZZ01000002.1_prot_TBR36766.1_2502;	K04084	dsbD,	dipZ;	thioredoxin:protein	disulfide	reductase	[EC:1.8.4.16]
D	lcl|SIZZ01000001.1_prot_TBR39141.1_504;	K02199	ccmG,	dsbE;	cytochrome	c	biogenesis	protein	CcmG,	thiol:disulfide	interchange	protein	DsbE
C	4131	Membrane	trafficking	[BR:ko04131]
D	lcl|SIZZ01000001.1_prot_TBR39319.1_704;	K00940	ndk,	NME;	nucleoside-diphosphate	kinase	[EC:2.7.4.6]
D	lcl|SIZZ01000002.1_prot_TBR36656.1_2375;	K21440	ANKRD50;	ankyrin	repeat	domain-containing	protein	50
[truncated: 786 more rows]

## Sheet: Level 1-Not Included in BRITE
Level 1 KEGG Annotations for Not Included in Pathway or Brite
[truncated: 319 more rows]

## Sheet: Level 1- Human Diseases
Level 1 KEGG Annotations for Human Diseases
[truncated: 372 more rows]

[truncated: 1 more sheets: Modules]
