# Supplementary material for: Isolation and Genome Analysis of an Amoeba-Associated Bacterium Dyella terrae Strain Ely Copper Mine From Acid Rock Drainage in Vermont, United States
Source: Front Microbiol. 2022 May 23;13:856908. doi: 10.3389/fmicb.2022.856908 (PMC9169046; doi:10.3389/fmicb.2022.856908)
Supplement: Supplementary file 3 [file Table_4.XLSX]

## Sheet: D_terrae_ECM_Diamond Best Hits
Best DIAMOND hits for Dyella terrae species Ely Copper Mine (BioProject PRJ771916)
qseqid	qstart	qend	sseqid	slen	sstart	send	bitscore	pident	evalue
DYST_00019	3	119	BAC0753copR	227	2	116	66.2	31.6	1.9e-13
DYST_00022	5	467	BAC0224merA	631	170	621	229.2	30.5	6.8e-62
DYST_00071	2	127	BAC0125czcR	225	1	123	53.9	32	1.7e-09
DYST_00100	1	636	sp|P0A5B9|DNAK_MYCTU	625	1	619	630.6	55.5	1.4e-182
DYST_00135	1	129	BAC0683merR1	144	8	135	67	34.1	1.4e-13
DYST_00138	19	411	BAC0108cusB	407	19	406	219.9	36.8	3.7e-59
DYST_00139	1	1042	BAC0107cusA/ybdE	1047	1	1044	1242.6	62.2	0
DYST_00140	33	96	BAC0110cusF/cusX	110	30	92	53.5	40.6	1.7e-09
DYST_00183	2	257	BAC0452yqjH	254	4	253	142.5	34.7	4.7e-36
DYST_00229	311	496	BAC0465znuC/yebM	251	3	184	95.9	35.4	1.2e-21
DYST_00239	25	169	BAC0719copR	230	4	149	47.8	30.5	1.4e-07
DYST_00242	6	121	BAC0083copR	227	3	119	48.9	32.2	3.8e-08
DYST_00253	3	115	BAC0583arsC	141	4	116	95.1	46	3.7e-22
DYST_00261	2	910	BAC0003acn	943	6	939	1109.4	59.2	0
DYST_00305	36	488	BAC0651merA	547	84	535	259.6	32	5e-71
DYST_00339	476	569	BAC0467zraR/hydH	441	8	99	43.1	31.9	8.9e-06
DYST_00344	1	216	BAC0487pmrA	222	1	216	154.8	38.9	7.5e-40
DYST_00345	102	368	BAC0637copS	462	171	439	113.6	31.4	3.4e-27
DYST_00520	42	646	BAC0302pbrT	630	19	625	562	50.7	6e-162
DYST_00548	8	263	BAC0608modE	262	7	261	132.9	36.8	3.7e-33
DYST_00622	1009	1086	BAC0089corR	466	7	83	50.1	35.4	1.3e-07
DYST_00624	15	154	BAC0719copR	230	3	134	73.2	32.1	3.5e-15
DYST_00649	53	164	BAC0035arsM	283	70	182	51.2	30.4	1.5e-08
DYST_00658	367	539	BAC0274nikE	268	33	210	61.6	31.5	2.5e-11
DYST_00728	233	449	BAC0289nrsS	454	223	444	75.5	30	1.6e-15
DYST_00755	722	946	BAC0289nrsS	454	227	446	90.9	30.7	8e-20
DYST_00781	20	139	BAC0753copR	227	2	120	62	30.6	5.1e-12
DYST_00782	1173	1288	BAC0125czcR	225	1	111	64.7	34.5	7.1e-12
DYST_00804	3	386	BAC0119czcA	1063	653	1041	330.1	45.8	2.3e-92
DYST_00805	1	518	BAC0119czcA	1063	1	523	385.6	43	7.7e-109
DYST_00835	59	520	BAC0312pitA	499	13	492	371.3	43.9	1.2e-104
DYST_00850	20	582	BAC0432ybtP	600	16	575	219.9	32.4	5.1e-59
DYST_00853	5	231	BAC0114cutC	248	3	221	176.8	45.4	2.1e-46
DYST_00857	2	129	BAC0538chrR	186	6	130	88.6	36.7	5.6e-20
DYST_00864	15	85	BAC0089corR	466	1	70	42.7	32.4	4.8e-06
DYST_01008	29	106	BAC0719copR	230	146	223	49.7	34.6	1.2e-07
DYST_01054	1	337	BAC0604wtpC	344	1	332	199.1	37	5.9e-53
DYST_01055	65	272	BAC0599modB	233	18	222	119.4	34.6	4.6e-29
DYST_01056	46	272	BAC0610modB	229	2	229	113.6	33.2	2.4e-27
DYST_01112	48	811	BAC0568actP	841	24	837	814.7	55.3	6.5e-238
DYST_01113	8	141	BAC0182golS	154	1	136	99.4	43.1	2.4e-23
DYST_01115	44	319	BAC0637copS	462	167	458	118.2	31.8	1.1e-28
DYST_01117	1	220	BAC0487pmrA	222	1	216	149.4	37.3	3.3e-38
DYST_01125	15	461	BAC0374srpC	470	12	466	338.6	45.1	7.8e-95
DYST_01126	1	1034	BAC0563acrD	1037	1	1036	1186.4	60.4	0
DYST_01145	1	43	BAC0433ybtQ	600	552	594	43.9	44.2	3.9e-07
DYST_01146	357	520	BAC0311pgpA/ltpgpA	1548	1281	1439	72	31	1.7e-14
DYST_01176	156	449	BAC0091corS	491	200	487	118.2	31.4	1.6e-28
DYST_01177	3	223	BAC0125czcR	225	2	219	145.6	38	4.7e-37
DYST_01189	40	315	BAC0459zitB/ybgR	313	19	294	224.2	43.7	1.5e-60
DYST_01191	26	164	BAC0470zur/yjbK	171	7	146	125.2	44.3	4.9e-31
DYST_01193	1	229	BAC0719copR	230	1	228	200.7	45.9	1.3e-53
DYST_01194	237	452	BAC0289nrsS	454	225	445	93.2	32	5.6e-21
DYST_01196	1	476	BAC0119czcA	1063	1	465	248.1	34.6	1.9e-67
DYST_01197	23	436	BAC0130czrA	1051	629	1039	313.9	41.3	2e-87
DYST_01203	50	173	BAC0299pbrB/pbrC	358	41	176	42	31.4	6.2e-06
DYST_01245	1	221	BAC0487pmrA	222	1	221	170.6	41.2	1.3e-44
DYST_01246	172	459	BAC0488pmrB	364	71	352	116.7	30.1	4.8e-28
DYST_01255	15	343	BAC0318pstS	346	13	338	324.3	49.2	1.1e-90
DYST_01256	25	337	BAC0317pstC	319	16	317	297.7	53.7	1.1e-82
DYST_01257	10	287	BAC0315pstA	296	22	294	249.2	47.5	3.9e-68
DYST_01258	21	271	BAC0316pstB	257	7	257	373.6	70.1	1.3e-105
DYST_01277	8	360	BAC0611modC	352	2	350	230.3	38	2.3e-62
DYST_01278	14	219	BAC0599modB	233	20	218	124.8	39.3	8.6e-31
DYST_01325	34	865	BAC0003acn	943	36	942	713	41.9	2.8e-207
DYST_01339	3	113	BAC0090corR/coaR	370	6	120	59.7	37.4	5.2e-11
DYST_01347	750	977	BAC0126czcS	476	234	468	68.9	30.3	2.7e-13
DYST_01376	3	230	BAC0125czcR	225	2	221	137.5	36.4	1.3e-34
DYST_01383	22	110	BAC0076comR/ycfQ	210	21	104	49.3	32.6	4.7e-08
DYST_01384	234	299	BAC0460zneB/hmxB	385	208	274	47	37.3	3.8e-07
DYST_01402	1	91	BAC0475dmeR	90	1	90	79	40.7	2.2e-17
DYST_01412	249	475	BAC0468zraS/hydG	465	250	465	103.6	30.3	8e-24
DYST_01414	12	127	BAC0083copR	227	3	117	77.8	40.2	2e-16
DYST_01431	50	327	BAC0718copB	326	37	325	229.2	43.6	4.7e-62
DYST_01432	13	576	BAC0077copA	609	7	607	676	57.3	2.6e-196
DYST_01439	534	971	BAC0356recG	691	199	643	221.9	35.2	2.6e-59
DYST_01460	39	400	BAC0645mdtA	413	49	409	255	40.9	1e-69
DYST_01461	4	1029	BAC0646mdtB	1040	13	1040	1100.1	58	0
DYST_01462	7	1081	BAC0647mdtC	1026	7	1017	927.9	49.1	7.1e-272
DYST_01471	1	1040	BAC0563acrD	1037	1	1028	875.9	45.8	3.2e-256
DYST_01477	9	84	BAC0201kmtR	130	21	93	53.1	46.1	4.3e-09
DYST_01498	4	224	BAC0125czcR	225	2	218	154.1	42.5	1.3e-39
DYST_01499	184	390	BAC0720copS	477	235	458	81.6	30.4	1.5e-17
DYST_01585	158	279	sp|P0A5B9|DNAK_MYCTU	625	91	205	56.2	30.9	7.6e-10
DYST_01587	12	68	BAC0366smtB/ziaR	122	40	96	43.1	40.4	1.8e-06
DYST_01633	3	515	sp|P0A5B9|DNAK_MYCTU	625	5	516	309.7	36.4	4.7e-86
DYST_01653	17	138	BAC0089corR	466	16	138	66.6	35.5	3.1e-13
DYST_01725	5	446	BAC0651merA	547	86	530	219.5	30.8	5.1e-59
DYST_01751	266	514	BAC0088corC	292	29	279	123.2	30.6	5.7e-30
DYST_01814	1	223	BAC0083copR	227	1	226	173.3	46.3	2.1e-45
DYST_01815	261	459	BAC0289nrsS	454	224	425	95.9	33.3	9.2e-22
DYST_01823	16	239	BAC0162fbpC	356	12	230	115.9	32.2	4.5e-28
DYST_01831	1	225	BAC0083copR	227	1	225	195.7	44.9	3.9e-52
DYST_01832	198	439	BAC0720copS	477	235	477	104	30.7	3e-24
DYST_01842	1	229	BAC0604wtpC	344	1	214	69.7	30.1	3.7e-14
DYST_01912	24	222	BAC0604wtpC	344	16	221	97.4	31.6	2e-22
DYST_01916	339	510	BAC0465znuC/yebM	251	7	184	59.7	30.2	8e-11
DYST_01951	67	181	BAC0028chrC	202	75	189	73.6	40	1.9e-15
DYST_01972	1	138	BAC0088corC	292	138	274	149.8	54.3	1.6e-38
DYST_02010	6	109	BAC0467zraR/hydH	441	8	111	77.4	37.5	1.3e-16
DYST_02013	124	263	BAC0289nrsS	454	222	366	47.4	30.1	2.5e-07
DYST_02014	11	229	BAC0719copR	230	3	221	162.2	41.8	5.2e-42
DYST_02016	39	237	BAC0274nikE	268	27	231	116.7	39.6	2.6e-28
DYST_02033	1927	2048	BAC0125czcR	225	3	121	65.9	31.1	4.3e-12
DYST_02036	4	119	BAC0753copR	227	3	116	73.6	35.3	1.2e-15
DYST_02037	9	124	BAC0125czcR	225	1	113	67.8	34.5	7.1e-14
DYST_02057	29	567	BAC0433ybtQ	600	35	576	213.8	30.9	3.6e-57
DYST_02062	831	1047	BAC0198irlS	464	244	460	92.4	30.3	2.5e-20
DYST_02067	23	721	BAC0169fpvA	815	112	815	427.6	36.9	2e-121
DYST_02083	546	783	BAC0289nrsS	454	222	446	89.7	30.3	1.7e-19
DYST_02086	7	141	BAC0125czcR	225	2	132	72.8	33.1	5.7e-15
DYST_02112	13	252	BAC0162fbpC	356	11	247	119	32.2	5.7e-29
DYST_02132	62	244	BAC0274nikE	268	28	230	84	32.4	3.4e-18
DYST_02196	1	223	BAC0719copR	230	1	224	177.2	41.1	1.5e-46
DYST_02212	443	690	BAC0432ybtP	600	294	549	145.6	36.4	1.5e-36
DYST_02287	25	272	BAC0400troB	266	6	240	92.8	31.9	4.6e-21
DYST_02297	13	467	BAC0374srpC	470	10	465	169.5	30.8	6.6e-44
DYST_02301	7	230	BAC0083copR	227	3	226	195.7	45.1	4.1e-52
DYST_02304	45	130	BAC0719copR	230	30	113	53.9	32.6	2.3e-09
DYST_02306	11	225	BAC0274nikE	268	18	240	112.5	36.3	4.4e-27
DYST_02314	1	86	BAC0638copR	231	1	79	49.7	36	3.2e-08
DYST_02315	392	612	BAC0289nrsS	454	227	444	93.2	33.3	1.2e-20
DYST_02408	23	431	BAC0467zraR/hydH	441	22	435	266.5	37.4	3.6e-73
DYST_02460	10	101	BAC0113cutA	112	16	107	85.9	43.5	2.1e-19
DYST_02545	39	149	BAC0035arsM	283	72	186	60.8	36.5	1.7e-11
DYST_02563	2	210	BAC0607tupC	214	3	207	110.9	32.9	1.4e-26
DYST_02573	25	220	BAC0604wtpC	344	16	211	89.4	30.8	5.6e-20
DYST_02577	5	91	BAC0201kmtR	130	20	105	48.9	32.2	2.8e-08
DYST_02583	12	91	BAC0071cmtR	118	11	89	42.7	37.5	4.4e-06
DYST_02621	1	218	BAC0487pmrA	222	1	218	159.1	39.9	4e-41
DYST_02622	170	456	BAC0488pmrB	364	72	352	124.4	34	2.3e-30
DYST_02624	7	237	BAC0197irlR	229	3	221	122.9	36.2	3.6e-30
DYST_02660	11	347	BAC0579arsB	383	16	362	251.5	44.4	9.6e-69
DYST_02661	16	149	BAC0581arsC	139	6	134	73.6	35.1	1.8e-15
DYST_02663	26	222	BAC0595arsH	206	3	199	287.7	70.6	8.1e-80
DYST_02670	2	116	BAC0125czcR	225	1	112	57	32.5	2.4e-10
DYST_02712	20	98	BAC0281nmtR	120	20	98	66.2	45.6	1.7e-13
DYST_02730	9	253	BAC0452yqjH	254	9	251	146	36.1	4.2e-37
DYST_02753	2	128	BAC0125czcR	225	1	124	63.5	31.8	2.6e-12
DYST_02773	3	103	BAC0089corR	466	7	104	55.8	30.7	4.8e-10
DYST_02788	29	495	BAC0374srpC	470	10	468	151	30.6	2.5e-38
DYST_02805	23	224	BAC0604wtpC	344	16	217	92.4	31.5	5.1e-21
DYST_02822	65	169	BAC0035arsM	283	78	181	59.3	35.2	4.9e-11
DYST_02832	18	466	BAC0224merA	631	170	616	241.1	33	1.7e-65
DYST_02878	9	339	BAC0604wtpC	344	7	325	196.4	36.8	3.7e-52
DYST_02934	44	148	BAC0035arsM	283	75	182	60.5	35.2	2.6e-11
DYST_03003	3	455	BAC0467zraR/hydH	441	2	439	303.1	42.2	3.6e-84
DYST_03004	123	336	BAC0468zraS/hydG	465	251	462	100.9	31.7	2e-23
DYST_03008	28	325	BAC0168fptA	720	418	720	173.7	35.2	2.3e-45
DYST_03009	132	458	BAC0168fptA	720	29	347	201.1	37.3	2.1e-53
DYST_03016	98	314	BAC0162fbpC	356	8	231	102.1	30	9.3e-24
DYST_03017	13	152	BAC0611modC	352	77	211	64.3	30.5	1e-12
DYST_03018	26	67	BAC0465znuC/yebM	251	18	59	52	50	2.2e-09
DYST_03028	7	99	BAC0753copR	227	129	221	50.8	30.1	3.6e-08
DYST_03032	3	1038	BAC0563acrD	1037	1	1027	714.9	40.7	9.2e-208
DYST_03038	9	118	BAC0089corR	466	8	117	52	32.7	7.9e-09
DYST_03143	1	113	BAC0125czcR	225	1	113	57.4	33.9	1.7e-10
DYST_03157	116	426	BAC0103cueO	516	67	368	115.9	30	9.2e-28
DYST_03158	4	37	BAC0205mco	447	408	440	41.6	50	1.9e-06
DYST_03164	1	1026	BAC0647mdtC	1026	12	1021	709.5	43	3.8e-206
DYST_03165	1	1027	BAC0647mdtC	1026	1	1010	693	42.9	3.7e-201
DYST_03231	1	149	BAC0048bfrA	159	1	149	137.5	47.7	8.8e-35
DYST_03342	21	243	BAC0083copR	227	5	220	89.4	31.1	4.4e-20
DYST_03343	285	425	BAC0637copS	462	315	458	50.4	30.2	3.9e-08
DYST_03359	55	413	BAC0645mdtA	413	54	412	240.7	38.8	2e-65
DYST_03360	2	1070	BAC0646mdtB	1040	11	1039	956.8	50.9	1.4e-280
DYST_03363	7	1024	BAC0647mdtC	1026	7	1016	777.3	45.4	1.5e-226
DYST_03424	1	216	BAC0487pmrA	222	1	216	163.3	41.2	2.1e-42
DYST_03425	175	461	BAC0488pmrB	364	73	354	114.4	31.8	2.4e-27
DYST_03437	13	127	BAC0683merR1	144	8	119	58.2	34.5	6.7e-11
DYST_03470	2	886	BAC0087mgtA	898	23	896	912.9	54.4	1.9e-267
DYST_03472	50	372	BAC0460zneB/hmxB	385	53	366	218.8	41	7.3e-59
DYST_03473	1	1011	BAC0119czcA	1063	1	1033	607.1	35	2.6e-175
DYST_03520	25	347	BAC0163fecD	318	7	318	169.1	37.4	6.2e-44
DYST_03521	19	257	BAC0164fecE	255	3	237	138.7	37.3	7.1e-35
DYST_03523	233	459	BAC0289nrsS	454	217	445	107.8	32	2.2e-25
DYST_03524	1	218	BAC0487pmrA	222	1	216	179.5	43.6	2.9e-47
DYST_03586	6	399	BAC0293ruvB	397	3	397	445.7	55.9	7.4e-127
DYST_03593	200	513	BAC0089corR	466	145	457	204.9	39.5	1.5e-54
DYST_03614	1	336	BAC0285nreB	416	52	395	194.9	38.4	1.1e-51
DYST_03635	127	583	BAC0224merA	631	173	626	217.6	30	2.5e-58
DYST_03655	5	225	BAC0487pmrA	222	3	214	105.5	32.6	5.5e-25
DYST_03771	33	258	BAC0604wtpC	344	19	245	122.1	33.9	6.9e-30
DYST_03782	12	702	BAC0356recG	691	1	688	842.4	63.2	2.5e-246
DYST_03801	44	372	BAC0645mdtA	413	60	390	177.2	35.3	2.4e-46
DYST_03802	1	1023	BAC0647mdtC	1026	1	1018	860.5	47.6	1.3e-251
DYST_03807	4	224	BAC0162fbpC	356	11	226	114	32.9	1.5e-27
DYST_03825	1	224	BAC0719copR	230	1	225	164.1	41.2	1.3e-42
DYST_03837	112	729	BAC0101ctpV	770	133	762	320.9	35	2.7e-89
DYST_03848	312	506	BAC0465znuC/yebM	251	4	197	93.6	31.5	5.9e-21
DYST_03906	8	67	BAC0644corD	125	66	125	74.3	51.7	3.9e-16
DYST_03924	92	582	BAC0101ctpV	770	242	713	187.2	31.2	4.3e-49
DYST_03928	665	886	BAC0126czcS	476	241	460	82	31.4	2.5e-17
DYST_03929	6	224	BAC0719copR	230	2	219	146.7	36.4	2.1e-37
DYST_03947	5	227	BAC0719copR	230	2	221	124	36.2	1.6e-30
DYST_03953	6	110	BAC0538chrR	186	10	116	60.5	34.3	1.6e-11
DYST_03974	64	134	BAC0638copR	231	47	115	47.8	33.8	8.7e-08
DYST_03976	5	383	BAC0089corR	466	6	384	278.9	42.7	7.8e-77
DYST_03984	309	532	BAC0091corS	491	272	486	112.8	33.5	8.2e-27
DYST_04024	5	348	BAC0355ruvB	352	6	352	456.1	66.6	2.5e-130
DYST_04033	8	215	BAC0490G2alt	221	5	207	100.1	34.7	2.3e-23
DYST_04061	99	179	BAC0035arsM	283	71	153	49.7	36.1	4.3e-08
DYST_04133	1	236	BAC0604wtpC	344	1	234	138.7	36	6.1e-35
DYST_04148	215	430	BAC0643corB	227	3	217	88.2	30.5	1.7e-19
DYST_04181	12	245	BAC0138dsbC	236	4	226	145.2	32.4	6.8e-37
DYST_04190	45	164	BAC0719copR	230	1	117	66.2	34.7	2.7e-13
DYST_04215	322	499	BAC0465znuC/yebM	251	4	180	83.2	31.9	7e-18
DYST_04245	1	223	BAC0604wtpC	344	1	214	119.8	33.8	2.9e-29
DYST_04256	3	442	BAC0089corR	466	6	457	288.1	39.4	1.2e-79
DYST_04258	353	442	BAC0198irlS	464	352	447	45.4	30.2	1.3e-06
DYST_04303	91	464	BAC0467zraR/hydH	441	90	441	256.1	40.1	5.2e-70
DYST_04325	1	123	BAC0347silR	228	1	118	64.3	30.1	8e-13
DYST_04338	4	119	BAC0467zraR/hydH	441	8	121	77.4	38.5	8.4e-17
DYST_04339	409	521	BAC0468zraS/hydG	465	373	458	53.5	30.1	7.1e-09
DYST_04345	4	108	BAC0125czcR	225	1	101	45.1	32.7	1.4e-06
DYST_04447	9	157	BAC0137dsbB	176	12	158	51.2	30.5	8.8e-09
DYST_04554	25	222	BAC0607tupC	214	22	209	132.5	37.9	6.2e-33
DYST_04579	27	145	BAC0089corR	466	2	121	65.1	32.5	6.9e-13
DYST_04598	192	405	BAC0289nrsS	454	222	441	129.8	35.5	5e-32
DYST_04599	4	227	BAC0719copR	230	2	223	131	33.5	1.2e-32
DYST_04636	462	586	BAC0604wtpC	344	106	224	51.2	31.2	5.2e-08
DYST_04646	9	153	BAC0299pbrB/pbrC	358	203	343	93.2	43.8	2e-21
DYST_04745	29	349	BAC0074cnrT	351	1	325	283.9	59.9	1.8e-78
DYST_04757	35	164	BAC0638copR	231	32	162	60.8	32.6	1.4e-11
DYST_04759	2	209	BAC0607tupC	214	3	207	102.8	30.5	4.8e-24
DYST_04790	6	181	BAC0538chrR	186	7	182	174.1	49.2	1e-45
DYST_04850	65	476	BAC0374srpC	470	60	468	143.7	30.9	4e-36
DYST_04866	32	231	BAC0604wtpC	344	16	210	117.1	35.3	1.9e-28
DYST_04870	54	585	BAC0433ybtQ	600	51	580	197.2	31.1	3.6e-52

## Sheet: D_terrae_ECM_Unique MRG
Unique BacMet Metal Resistance Genes for Dyella terrae species Ely Copper Mine (BioProject PRJ771916)
gene.name
acn	2
acrD	3
actP	1
arsB	1
arsC	2
arsH	1
arsM	5
bfrA	1
chrC	1
chrR	3
cmtR	1
cnrT	1
comR/ycfQ	1
copA	1
copB	1
copR	25
copS	5
corB	1
corC	2
corD	1
corR	9
corR/coaR	1
corS	2
ctpV	2
cueO	1
cusA/ybdE	1
cusB	1
cusF/cusX	1
cutA	1
cutC	1
czcA	4
czcR	12
czcS	2
czrA	1
dmeR	1
dsbB	1
dsbC	1
fbpC	4
fecD	1
fecE	1
fptA	2
fpvA	1
G2alt	1
golS	1
irlR	1
irlS	2
kmtR	2
mco	1
mdtA	3
mdtB	2
mdtC	5
merA	5
merR1	2
mgtA	1
modB	3
modC	2
modE	1
nikE	4
nmtR	1
nreB	1
nrsS	9
pbrB/pbrC	2
pbrT	1
pgpA/ltpgpA	1
pitA	1
pmrA	7
pmrB	3
pstA	1
pstB	1
pstC	1
pstS	1
recG	2
ruvB	2
silR	1
smtB/ziaR	1
srpC	4
troB	1
tupC	3
wtpC	11
ybtP	2
ybtQ	3
yqjH	2
zitB/ybgR	1
zneB/hmxB	2
znuC/yebM	5
zraR/hydH	6
zraS/hydG	3
zur/yjbK	1
DNAK_MYCTU	3
	229

## Sheet: D_terrae_ECM_MRG List Hits
All annotated BacMet metal resistance genes for Dyella terrae species Ely Copper Mine (BioProject PRJ771916)
ID	qstart	qend	sseqID	slen	sstart	send	bitscore	pident	evalue	gene.name
DYST_00261	2	910	BAC0003acn	943	6	939	1109.4	59.2	0	acn	2
DYST_01325	34	865	BAC0003acn	943	36	942	713	41.9	2.8e-207	acn
DYST_01126	1	1034	BAC0563acrD	1037	1	1036	1186.4	60.4	0	acrD	3
DYST_01471	1	1040	BAC0563acrD	1037	1	1028	875.9	45.8	3.2e-256	acrD
DYST_03032	3	1038	BAC0563acrD	1037	1	1027	714.9	40.7	9.2e-208	acrD
DYST_01112	48	811	BAC0568actP	841	24	837	814.7	55.3	6.5e-238	actP	1
DYST_02660	11	347	BAC0579arsB	383	16	362	251.5	44.4	9.6e-69	arsB	1
DYST_00253	3	115	BAC0583arsC	141	4	116	95.1	46	3.7e-22	arsC	2
DYST_02661	16	149	BAC0581arsC	139	6	134	73.6	35.1	1.8e-15	arsC
DYST_02663	26	222	BAC0595arsH	206	3	199	287.7	70.6	8.1e-80	arsH	1
DYST_00649	53	164	BAC0035arsM	283	70	182	51.2	30.4	1.5e-08	arsM	5
DYST_02545	39	149	BAC0035arsM	283	72	186	60.8	36.5	1.7e-11	arsM
DYST_02822	65	169	BAC0035arsM	283	78	181	59.3	35.2	4.9e-11	arsM
DYST_02934	44	148	BAC0035arsM	283	75	182	60.5	35.2	2.6e-11	arsM
DYST_04061	99	179	BAC0035arsM	283	71	153	49.7	36.1	4.3e-08	arsM
DYST_03231	1	149	BAC0048bfrA	159	1	149	137.5	47.7	8.8e-35	bfrA	1
DYST_01951	67	181	BAC0028chrC	202	75	189	73.6	40	1.9e-15	chrC	1
DYST_00857	2	129	BAC0538chrR	186	6	130	88.6	36.7	5.6e-20	chrR	3
DYST_03953	6	110	BAC0538chrR	186	10	116	60.5	34.3	1.6e-11	chrR
DYST_04790	6	181	BAC0538chrR	186	7	182	174.1	49.2	1e-45	chrR
DYST_02583	12	91	BAC0071cmtR	118	11	89	42.7	37.5	4.4e-06	cmtR	1
DYST_04745	29	349	BAC0074cnrT	351	1	325	283.9	59.9	1.8e-78	cnrT	1
DYST_01383	22	110	BAC0076comR/ycfQ	210	21	104	49.3	32.6	4.7e-08	comR/ycfQ	1
DYST_01432	13	576	BAC0077copA	609	7	607	676	57.3	2.6e-196	copA	1
DYST_01431	50	327	BAC0718copB	326	37	325	229.2	43.6	4.7e-62	copB	1
DYST_00019	3	119	BAC0753copR	227	2	116	66.2	31.6	1.9e-13	copR	25
DYST_00239	25	169	BAC0719copR	230	4	149	47.8	30.5	1.4e-07	copR
DYST_00242	6	121	BAC0083copR	227	3	119	48.9	32.2	3.8e-08	copR
DYST_00624	15	154	BAC0719copR	230	3	134	73.2	32.1	3.5e-15	copR
DYST_00781	20	139	BAC0753copR	227	2	120	62	30.6	5.1e-12	copR
DYST_01008	29	106	BAC0719copR	230	146	223	49.7	34.6	1.2e-07	copR
DYST_01193	1	229	BAC0719copR	230	1	228	200.7	45.9	1.3e-53	copR
DYST_01414	12	127	BAC0083copR	227	3	117	77.8	40.2	2e-16	copR
DYST_01814	1	223	BAC0083copR	227	1	226	173.3	46.3	2.1e-45	copR
DYST_01831	1	225	BAC0083copR	227	1	225	195.7	44.9	3.9e-52	copR
DYST_02014	11	229	BAC0719copR	230	3	221	162.2	41.8	5.2e-42	copR
DYST_02036	4	119	BAC0753copR	227	3	116	73.6	35.3	1.2e-15	copR
DYST_02196	1	223	BAC0719copR	230	1	224	177.2	41.1	1.5e-46	copR
DYST_02301	7	230	BAC0083copR	227	3	226	195.7	45.1	4.1e-52	copR
DYST_02304	45	130	BAC0719copR	230	30	113	53.9	32.6	2.3e-09	copR
DYST_02314	1	86	BAC0638copR	231	1	79	49.7	36	3.2e-08	copR
DYST_03028	7	99	BAC0753copR	227	129	221	50.8	30.1	3.6e-08	copR
DYST_03342	21	243	BAC0083copR	227	5	220	89.4	31.1	4.4e-20	copR
DYST_03825	1	224	BAC0719copR	230	1	225	164.1	41.2	1.3e-42	copR
DYST_03929	6	224	BAC0719copR	230	2	219	146.7	36.4	2.1e-37	copR
DYST_03947	5	227	BAC0719copR	230	2	221	124	36.2	1.6e-30	copR
DYST_03974	64	134	BAC0638copR	231	47	115	47.8	33.8	8.7e-08	copR
DYST_04190	45	164	BAC0719copR	230	1	117	66.2	34.7	2.7e-13	copR
DYST_04599	4	227	BAC0719copR	230	2	223	131	33.5	1.2e-32	copR
DYST_04757	35	164	BAC0638copR	231	32	162	60.8	32.6	1.4e-11	copR
DYST_00345	102	368	BAC0637copS	462	171	439	113.6	31.4	3.4e-27	copS	5
DYST_01115	44	319	BAC0637copS	462	167	458	118.2	31.8	1.1e-28	copS
DYST_01499	184	390	BAC0720copS	477	235	458	81.6	30.4	1.5e-17	copS
DYST_01832	198	439	BAC0720copS	477	235	477	104	30.7	3e-24	copS
DYST_03343	285	425	BAC0637copS	462	315	458	50.4	30.2	3.9e-08	copS
DYST_04148	215	430	BAC0643corB	227	3	217	88.2	30.5	1.7e-19	corB	1
DYST_01751	266	514	BAC0088corC	292	29	279	123.2	30.6	5.7e-30	corC	2
DYST_01972	1	138	BAC0088corC	292	138	274	149.8	54.3	1.6e-38	corC
DYST_03906	8	67	BAC0644corD	125	66	125	74.3	51.7	3.9e-16	corD	1
DYST_00622	1009	1086	BAC0089corR	466	7	83	50.1	35.4	1.3e-07	corR	9
DYST_00864	15	85	BAC0089corR	466	1	70	42.7	32.4	4.8e-06	corR
DYST_01653	17	138	BAC0089corR	466	16	138	66.6	35.5	3.1e-13	corR
DYST_02773	3	103	BAC0089corR	466	7	104	55.8	30.7	4.8e-10	corR
DYST_03038	9	118	BAC0089corR	466	8	117	52	32.7	7.9e-09	corR
DYST_03593	200	513	BAC0089corR	466	145	457	204.9	39.5	1.5e-54	corR
DYST_03976	5	383	BAC0089corR	466	6	384	278.9	42.7	7.8e-77	corR
DYST_04256	3	442	BAC0089corR	466	6	457	288.1	39.4	1.2e-79	corR
DYST_04579	27	145	BAC0089corR	466	2	121	65.1	32.5	6.9e-13	corR
DYST_01339	3	113	BAC0090corR/coaR	370	6	120	59.7	37.4	5.2e-11	corR/coaR	1
DYST_01176	156	449	BAC0091corS	491	200	487	118.2	31.4	1.6e-28	corS	2
DYST_03984	309	532	BAC0091corS	491	272	486	112.8	33.5	8.2e-27	corS
DYST_03837	112	729	BAC0101ctpV	770	133	762	320.9	35	2.7e-89	ctpV	2
DYST_03924	92	582	BAC0101ctpV	770	242	713	187.2	31.2	4.3e-49	ctpV
DYST_03157	116	426	BAC0103cueO	516	67	368	115.9	30	9.2e-28	cueO	1
DYST_00139	1	1042	BAC0107cusA/ybdE	1047	1	1044	1242.6	62.2	0	cusA/ybdE	1
DYST_00138	19	411	BAC0108cusB	407	19	406	219.9	36.8	3.7e-59	cusB	1
DYST_00140	33	96	BAC0110cusF/cusX	110	30	92	53.5	40.6	1.7e-09	cusF/cusX	1
DYST_02460	10	101	BAC0113cutA	112	16	107	85.9	43.5	2.1e-19	cutA	1
DYST_00853	5	231	BAC0114cutC	248	3	221	176.8	45.4	2.1e-46	cutC	1
DYST_00804	3	386	BAC0119czcA	1063	653	1041	330.1	45.8	2.3e-92	czcA	4
DYST_00805	1	518	BAC0119czcA	1063	1	523	385.6	43	7.7e-109	czcA
DYST_01196	1	476	BAC0119czcA	1063	1	465	248.1	34.6	1.9e-67	czcA
DYST_03473	1	1011	BAC0119czcA	1063	1	1033	607.1	35	2.6e-175	czcA
DYST_00071	2	127	BAC0125czcR	225	1	123	53.9	32	1.7e-09	czcR	12
DYST_00782	1173	1288	BAC0125czcR	225	1	111	64.7	34.5	7.1e-12	czcR
DYST_01177	3	223	BAC0125czcR	225	2	219	145.6	38	4.7e-37	czcR
DYST_01376	3	230	BAC0125czcR	225	2	221	137.5	36.4	1.3e-34	czcR
DYST_01498	4	224	BAC0125czcR	225	2	218	154.1	42.5	1.3e-39	czcR
DYST_02033	1927	2048	BAC0125czcR	225	3	121	65.9	31.1	4.3e-12	czcR
DYST_02037	9	124	BAC0125czcR	225	1	113	67.8	34.5	7.1e-14	czcR
DYST_02086	7	141	BAC0125czcR	225	2	132	72.8	33.1	5.7e-15	czcR
DYST_02670	2	116	BAC0125czcR	225	1	112	57	32.5	2.4e-10	czcR
DYST_02753	2	128	BAC0125czcR	225	1	124	63.5	31.8	2.6e-12	czcR
DYST_03143	1	113	BAC0125czcR	225	1	113	57.4	33.9	1.7e-10	czcR
DYST_04345	4	108	BAC0125czcR	225	1	101	45.1	32.7	1.4e-06	czcR
DYST_01347	750	977	BAC0126czcS	476	234	468	68.9	30.3	2.7e-13	czcS	2
DYST_03928	665	886	BAC0126czcS	476	241	460	82	31.4	2.5e-17	czcS
DYST_01197	23	436	BAC0130czrA	1051	629	1039	313.9	41.3	2e-87	czrA	1
DYST_01402	1	91	BAC0475dmeR	90	1	90	79	40.7	2.2e-17	dmeR	1
DYST_04447	9	157	BAC0137dsbB	176	12	158	51.2	30.5	8.8e-09	dsbB	1
DYST_04181	12	245	BAC0138dsbC	236	4	226	145.2	32.4	6.8e-37	dsbC	1
DYST_01823	16	239	BAC0162fbpC	356	12	230	115.9	32.2	4.5e-28	fbpC	4
DYST_02112	13	252	BAC0162fbpC	356	11	247	119	32.2	5.7e-29	fbpC
DYST_03016	98	314	BAC0162fbpC	356	8	231	102.1	30	9.3e-24	fbpC
DYST_03807	4	224	BAC0162fbpC	356	11	226	114	32.9	1.5e-27	fbpC
DYST_03520	25	347	BAC0163fecD	318	7	318	169.1	37.4	6.2e-44	fecD	1
DYST_03521	19	257	BAC0164fecE	255	3	237	138.7	37.3	7.1e-35	fecE	1
DYST_03008	28	325	BAC0168fptA	720	418	720	173.7	35.2	2.3e-45	fptA	2
DYST_03009	132	458	BAC0168fptA	720	29	347	201.1	37.3	2.1e-53	fptA
DYST_02067	23	721	BAC0169fpvA	815	112	815	427.6	36.9	2e-121	fpvA	1
DYST_04033	8	215	BAC0490G2alt	221	5	207	100.1	34.7	2.3e-23	G2alt	1
DYST_01113	8	141	BAC0182golS	154	1	136	99.4	43.1	2.4e-23	golS	1
DYST_02624	7	237	BAC0197irlR	229	3	221	122.9	36.2	3.6e-30	irlR	1
DYST_02062	831	1047	BAC0198irlS	464	244	460	92.4	30.3	2.5e-20	irlS	2
DYST_04258	353	442	BAC0198irlS	464	352	447	45.4	30.2	1.3e-06	irlS
DYST_01477	9	84	BAC0201kmtR	130	21	93	53.1	46.1	4.3e-09	kmtR	2
DYST_02577	5	91	BAC0201kmtR	130	20	105	48.9	32.2	2.8e-08	kmtR
DYST_03158	4	37	BAC0205mco	447	408	440	41.6	50	1.9e-06	mco	1
DYST_01460	39	400	BAC0645mdtA	413	49	409	255	40.9	1e-69	mdtA	3
DYST_03359	55	413	BAC0645mdtA	413	54	412	240.7	38.8	2e-65	mdtA
DYST_03801	44	372	BAC0645mdtA	413	60	390	177.2	35.3	2.4e-46	mdtA
DYST_01461	4	1029	BAC0646mdtB	1040	13	1040	1100.1	58	0	mdtB	2
DYST_03360	2	1070	BAC0646mdtB	1040	11	1039	956.8	50.9	1.4e-280	mdtB
DYST_01462	7	1081	BAC0647mdtC	1026	7	1017	927.9	49.1	7.1e-272	mdtC	5
DYST_03164	1	1026	BAC0647mdtC	1026	12	1021	709.5	43	3.8e-206	mdtC
DYST_03165	1	1027	BAC0647mdtC	1026	1	1010	693	42.9	3.7e-201	mdtC
DYST_03363	7	1024	BAC0647mdtC	1026	7	1016	777.3	45.4	1.5e-226	mdtC
DYST_03802	1	1023	BAC0647mdtC	1026	1	1018	860.5	47.6	1.3e-251	mdtC
DYST_00022	5	467	BAC0224merA	631	170	621	229.2	30.5	6.8e-62	merA	5
DYST_00305	36	488	BAC0651merA	547	84	535	259.6	32	5e-71	merA
DYST_01725	5	446	BAC0651merA	547	86	530	219.5	30.8	5.1e-59	merA
DYST_02832	18	466	BAC0224merA	631	170	616	241.1	33	1.7e-65	merA
DYST_03635	127	583	BAC0224merA	631	173	626	217.6	30	2.5e-58	merA
DYST_00135	1	129	BAC0683merR1	144	8	135	67	34.1	1.4e-13	merR1	2
DYST_03437	13	127	BAC0683merR1	144	8	119	58.2	34.5	6.7e-11	merR1
DYST_03470	2	886	BAC0087mgtA	898	23	896	912.9	54.4	1.9e-267	mgtA	1
DYST_01055	65	272	BAC0599modB	233	18	222	119.4	34.6	4.6e-29	modB	3
DYST_01056	46	272	BAC0610modB	229	2	229	113.6	33.2	2.4e-27	modB
DYST_01278	14	219	BAC0599modB	233	20	218	124.8	39.3	8.6e-31	modB
DYST_01277	8	360	BAC0611modC	352	2	350	230.3	38	2.3e-62	modC	2
DYST_03017	13	152	BAC0611modC	352	77	211	64.3	30.5	1e-12	modC
DYST_00548	8	263	BAC0608modE	262	7	261	132.9	36.8	3.7e-33	modE	1
DYST_00658	367	539	BAC0274nikE	268	33	210	61.6	31.5	2.5e-11	nikE	4
DYST_02016	39	237	BAC0274nikE	268	27	231	116.7	39.6	2.6e-28	nikE
DYST_02132	62	244	BAC0274nikE	268	28	230	84	32.4	3.4e-18	nikE
DYST_02306	11	225	BAC0274nikE	268	18	240	112.5	36.3	4.4e-27	nikE
DYST_02712	20	98	BAC0281nmtR	120	20	98	66.2	45.6	1.7e-13	nmtR	1
DYST_03614	1	336	BAC0285nreB	416	52	395	194.9	38.4	1.1e-51	nreB	1
DYST_00728	233	449	BAC0289nrsS	454	223	444	75.5	30	1.6e-15	nrsS	9
DYST_00755	722	946	BAC0289nrsS	454	227	446	90.9	30.7	8e-20	nrsS
DYST_01194	237	452	BAC0289nrsS	454	225	445	93.2	32	5.6e-21	nrsS
DYST_01815	261	459	BAC0289nrsS	454	224	425	95.9	33.3	9.2e-22	nrsS
DYST_02013	124	263	BAC0289nrsS	454	222	366	47.4	30.1	2.5e-07	nrsS
DYST_02083	546	783	BAC0289nrsS	454	222	446	89.7	30.3	1.7e-19	nrsS
DYST_02315	392	612	BAC0289nrsS	454	227	444	93.2	33.3	1.2e-20	nrsS
DYST_03523	233	459	BAC0289nrsS	454	217	445	107.8	32	2.2e-25	nrsS
DYST_04598	192	405	BAC0289nrsS	454	222	441	129.8	35.5	5e-32	nrsS
DYST_01203	50	173	BAC0299pbrB/pbrC	358	41	176	42	31.4	6.2e-06	pbrB/pbrC	2
DYST_04646	9	153	BAC0299pbrB/pbrC	358	203	343	93.2	43.8	2e-21	pbrB/pbrC
DYST_00520	42	646	BAC0302pbrT	630	19	625	562	50.7	6e-162	pbrT	1
DYST_01146	357	520	BAC0311pgpA/ltpgpA	1548	1281	1439	72	31	1.7e-14	pgpA/ltpgpA	1
DYST_00835	59	520	BAC0312pitA	499	13	492	371.3	43.9	1.2e-104	pitA	1
DYST_00344	1	216	BAC0487pmrA	222	1	216	154.8	38.9	7.5e-40	pmrA	7
DYST_01117	1	220	BAC0487pmrA	222	1	216	149.4	37.3	3.3e-38	pmrA
DYST_01245	1	221	BAC0487pmrA	222	1	221	170.6	41.2	1.3e-44	pmrA
DYST_02621	1	218	BAC0487pmrA	222	1	218	159.1	39.9	4e-41	pmrA
DYST_03424	1	216	BAC0487pmrA	222	1	216	163.3	41.2	2.1e-42	pmrA
DYST_03524	1	218	BAC0487pmrA	222	1	216	179.5	43.6	2.9e-47	pmrA
DYST_03655	5	225	BAC0487pmrA	222	3	214	105.5	32.6	5.5e-25	pmrA
DYST_01246	172	459	BAC0488pmrB	364	71	352	116.7	30.1	4.8e-28	pmrB	3
DYST_02622	170	456	BAC0488pmrB	364	72	352	124.4	34	2.3e-30	pmrB
DYST_03425	175	461	BAC0488pmrB	364	73	354	114.4	31.8	2.4e-27	pmrB
DYST_01257	10	287	BAC0315pstA	296	22	294	249.2	47.5	3.9e-68	pstA	1
DYST_01258	21	271	BAC0316pstB	257	7	257	373.6	70.1	1.3e-105	pstB	1
DYST_01256	25	337	BAC0317pstC	319	16	317	297.7	53.7	1.1e-82	pstC	1
DYST_01255	15	343	BAC0318pstS	346	13	338	324.3	49.2	1.1e-90	pstS	1
DYST_01439	534	971	BAC0356recG	691	199	643	221.9	35.2	2.6e-59	recG	2
DYST_03782	12	702	BAC0356recG	691	1	688	842.4	63.2	2.5e-246	recG
DYST_03586	6	399	BAC0293ruvB	397	3	397	445.7	55.9	7.4e-127	ruvB	2
DYST_04024	5	348	BAC0355ruvB	352	6	352	456.1	66.6	2.5e-130	ruvB
DYST_04325	1	123	BAC0347silR	228	1	118	64.3	30.1	8e-13	silR	1
DYST_01587	12	68	BAC0366smtB/ziaR	122	40	96	43.1	40.4	1.8e-06	smtB/ziaR	1
DYST_01125	15	461	BAC0374srpC	470	12	466	338.6	45.1	7.8e-95	srpC	4
DYST_02297	13	467	BAC0374srpC	470	10	465	169.5	30.8	6.6e-44	srpC
DYST_02788	29	495	BAC0374srpC	470	10	468	151	30.6	2.5e-38	srpC
DYST_04850	65	476	BAC0374srpC	470	60	468	143.7	30.9	4e-36	srpC
DYST_02287	25	272	BAC0400troB	266	6	240	92.8	31.9	4.6e-21	troB	1
DYST_02563	2	210	BAC0607tupC	214	3	207	110.9	32.9	1.4e-26	tupC	3
DYST_04554	25	222	BAC0607tupC	214	22	209	132.5	37.9	6.2e-33	tupC
DYST_04759	2	209	BAC0607tupC	214	3	207	102.8	30.5	4.8e-24	tupC
DYST_01054	1	337	BAC0604wtpC	344	1	332	199.1	37	5.9e-53	wtpC	11
DYST_01842	1	229	BAC0604wtpC	344	1	214	69.7	30.1	3.7e-14	wtpC
DYST_01912	24	222	BAC0604wtpC	344	16	221	97.4	31.6	2e-22	wtpC
DYST_02573	25	220	BAC0604wtpC	344	16	211	89.4	30.8	5.6e-20	wtpC
DYST_02805	23	224	BAC0604wtpC	344	16	217	92.4	31.5	5.1e-21	wtpC
DYST_02878	9	339	BAC0604wtpC	344	7	325	196.4	36.8	3.7e-52	wtpC
DYST_03771	33	258	BAC0604wtpC	344	19	245	122.1	33.9	6.9e-30	wtpC
DYST_04133	1	236	BAC0604wtpC	344	1	234	138.7	36	6.1e-35	wtpC
DYST_04245	1	223	BAC0604wtpC	344	1	214	119.8	33.8	2.9e-29	wtpC
DYST_04636	462	586	BAC0604wtpC	344	106	224	51.2	31.2	5.2e-08	wtpC
DYST_04866	32	231	BAC0604wtpC	344	16	210	117.1	35.3	1.9e-28	wtpC
DYST_00850	20	582	BAC0432ybtP	600	16	575	219.9	32.4	5.1e-59	ybtP	2
DYST_02212	443	690	BAC0432ybtP	600	294	549	145.6	36.4	1.5e-36	ybtP
DYST_01145	1	43	BAC0433ybtQ	600	552	594	43.9	44.2	3.9e-07	ybtQ	3
DYST_02057	29	567	BAC0433ybtQ	600	35	576	213.8	30.9	3.6e-57	ybtQ
DYST_04870	54	585	BAC0433ybtQ	600	51	580	197.2	31.1	3.6e-52	ybtQ
DYST_00183	2	257	BAC0452yqjH	254	4	253	142.5	34.7	4.7e-36	yqjH	2
DYST_02730	9	253	BAC0452yqjH	254	9	251	146	36.1	4.2e-37	yqjH
DYST_01189	40	315	BAC0459zitB/ybgR	313	19	294	224.2	43.7	1.5e-60	zitB/ybgR	1
DYST_01384	234	299	BAC0460zneB/hmxB	385	208	274	47	37.3	3.8e-07	zneB/hmxB	2
DYST_03472	50	372	BAC0460zneB/hmxB	385	53	366	218.8	41	7.3e-59	zneB/hmxB
DYST_00229	311	496	BAC0465znuC/yebM	251	3	184	95.9	35.4	1.2e-21	znuC/yebM	5
DYST_01916	339	510	BAC0465znuC/yebM	251	7	184	59.7	30.2	8e-11	znuC/yebM
DYST_03018	26	67	BAC0465znuC/yebM	251	18	59	52	50	2.2e-09	znuC/yebM
DYST_03848	312	506	BAC0465znuC/yebM	251	4	197	93.6	31.5	5.9e-21	znuC/yebM
DYST_04215	322	499	BAC0465znuC/yebM	251	4	180	83.2	31.9	7e-18	znuC/yebM
DYST_00339	476	569	BAC0467zraR/hydH	441	8	99	43.1	31.9	8.9e-06	zraR/hydH	6
DYST_02010	6	109	BAC0467zraR/hydH	441	8	111	77.4	37.5	1.3e-16	zraR/hydH
DYST_02408	23	431	BAC0467zraR/hydH	441	22	435	266.5	37.4	3.6e-73	zraR/hydH
DYST_03003	3	455	BAC0467zraR/hydH	441	2	439	303.1	42.2	3.6e-84	zraR/hydH
DYST_04303	91	464	BAC0467zraR/hydH	441	90	441	256.1	40.1	5.2e-70	zraR/hydH
DYST_04338	4	119	BAC0467zraR/hydH	441	8	121	77.4	38.5	8.4e-17	zraR/hydH
DYST_01412	249	475	BAC0468zraS/hydG	465	250	465	103.6	30.3	8e-24	zraS/hydG	3
DYST_03004	123	336	BAC0468zraS/hydG	465	251	462	100.9	31.7	2e-23	zraS/hydG
DYST_04339	409	521	BAC0468zraS/hydG	465	373	458	53.5	30.1	7.1e-09	zraS/hydG
DYST_01191	26	164	BAC0470zur/yjbK	171	7	146	125.2	44.3	4.9e-31	zur/yjbK	1
DYST_00100	1	636	sp|P0A5B9|DNAK_MYCTU	625	1	619	630.6	55.5	1.4e-182	DNAK_MCYTU	3
DYST_01585	158	279	sp|P0A5B9|DNAK_MYCTU	625	91	205	56.2	30.9	7.6e-10	DNAK_MCYTU
DYST_01633	3	515	sp|P0A5B9|DNAK_MYCTU	625	5	516	309.7	36.4	4.7e-86	DNAK_MCYTU

## Sheet: D_jiang SBZ_Diamond Best Hits
Best DIAMOND hits for Dyella jiangningensis SBZ 3-12 (BioProject: PRJEB16000)
qseqid	qstart	qend	sseqid	slen	sstart	send	bitscore	pident	evalue
AHX11856.1	11	213	BAC0465znuC/yebM	251	3	194	95.5	30.2	7.9e-22
AHX11865.1	33	258	BAC0604wtpC	344	19	245	121.7	33.9	8.9e-30
AHX11874.1	20	703	BAC0356recG	691	8	688	835.5	63.9	3.1e-244
AHX11893.1	41	369	BAC0645mdtA	413	60	390	178.7	34.4	8.3e-47
AHX11894.1	1	1028	BAC0647mdtC	1026	1	1022	872.8	48.3	2.5e-255
AHX11899.1	2	224	BAC0162fbpC	356	9	226	117.5	32.6	1.4e-28
AHX11919.1	1	224	BAC0719copR	230	1	225	164.1	41.2	1.3e-42
AHX11920.1	214	382	BAC0289nrsS	454	222	398	62.8	30.6	7.6e-12
AHX11929.1	124	794	BAC0101ctpV	770	78	762	325.1	34.1	1.5e-90
AHX11936.1	312	489	BAC0465znuC/yebM	251	4	180	90.9	33.3	3.8e-20
AHX12044.1	10	229	BAC0162fbpC	356	11	227	114.4	33.8	1.4e-27
AHX12067.1	7	141	BAC0125czcR	225	2	132	67.4	30.9	2.4e-13
AHX12070.1	547	784	BAC0289nrsS	454	222	446	99.8	32.1	1.6e-22
AHX12086.1	24	722	BAC0169fpvA	815	112	815	433.3	37	3.6e-123
AHX12091.1	803	1040	BAC0289nrsS	454	209	450	88.2	30.7	4.7e-19
AHX12096.1	6	567	BAC0433ybtQ	600	15	576	209.9	30.4	5.2e-56
AHX12102.1	43	252	BAC0138dsbC	236	24	228	141	32.1	1.3e-35
AHX12118.1	322	499	BAC0465znuC/yebM	251	4	180	85.5	31.9	1.4e-18
AHX12144.1	1	223	BAC0604wtpC	344	1	214	117.9	33.3	1.1e-28
AHX12154.1	3	442	BAC0089corR	466	6	457	279.6	38.6	4.1e-77
AHX12155.1	354	437	BAC0198irlS	464	352	441	43.1	32.2	6.7e-06
AHX12226.1	17	111	BAC0083copR	227	20	112	65.5	32.6	3.2e-13
AHX12227.1	4	119	BAC0753copR	227	3	116	70.9	34.5	8.1e-15
AHX12230.1	1926	2045	BAC0125czcR	225	3	119	64.3	32.5	1.3e-11
AHX12245.1	1	191	BAC0274nikE	268	35	231	102.1	37.7	5.3e-24
AHX12247.1	11	229	BAC0719copR	230	3	221	162.5	41.8	4e-42
AHX12251.1	6	109	BAC0467zraR/hydH	441	8	111	77	37.5	1.7e-16
AHX12284.1	20	271	BAC0088corC	292	23	274	241.1	49	1e-65
AHX12301.1	1	188	BAC0028chrC	202	1	189	75.9	30.6	3.9e-16
AHX12326.1	350	510	BAC0465znuC/yebM	251	21	184	58.9	32.9	1.4e-10
AHX12330.1	13	222	BAC0604wtpC	344	6	221	102.1	30.9	8e-24
AHX12351.1	16	227	BAC0274nikE	268	27	233	70.5	30.1	2.2e-14
AHX12361.1	21	237	BAC0274nikE	268	24	244	118.6	37.4	6.6e-29
AHX12369.1	163	450	BAC0488pmrB	364	67	345	97.8	30.2	2.3e-22
AHX12370.1	1	223	BAC0083copR	227	1	226	174.1	45.8	1.3e-45
AHX12399.1	34	860	BAC0003acn	943	36	942	732.3	43.2	4.5e-213
AHX12423.1	254	514	BAC0088corC	292	20	279	125.6	30.7	1.2e-30
AHX12446.1	5	446	BAC0651merA	547	86	530	216.9	31.2	3.3e-58
AHX12549.1	26	223	BAC0607tupC	214	23	210	130.2	37.4	3.1e-32
AHX12574.1	31	167	BAC0125czcR	225	2	135	72.4	30.7	4.3e-15
AHX12598.1	192	405	BAC0289nrsS	454	222	441	129.8	35	5e-32
AHX12599.1	4	223	BAC0197irlR	229	2	217	131.7	36.8	7.1e-33
AHX12632.1	828	929	BAC0164fecE	255	137	229	50.4	35.9	8.8e-08
AHX12641.1	9	153	BAC0299pbrB/pbrC	358	203	343	91.7	43.4	5.8e-21
AHX12654.1	6	75	BAC0201kmtR	130	18	87	52	45.7	9.6e-09
AHX12657.1	1	1039	BAC0563acrD	1037	1	1028	920.6	47.6	1.1e-269
AHX12680.1	6	212	BAC0607tupC	214	8	212	106.3	31.9	4.3e-25
AHX12685.1	6	180	BAC0538chrR	186	7	181	179.5	48.9	2.4e-47
AHX12718.1	31	169	BAC0600modC	253	22	174	56.2	31.6	3.5e-10
AHX12724.1	65	473	BAC0374srpC	470	60	465	142.5	30	8.8e-36
AHX12738.1	10	229	BAC0604wtpC	344	1	210	119.8	34.8	2.9e-29
AHX12742.1	346	587	BAC0311pgpA/ltpgpA	1548	1284	1517	132.5	35.4	1.1e-32
AHX12806.1	3	119	BAC0197irlR	229	2	115	71.2	35	6e-15
AHX12809.1	5	467	BAC0224merA	631	170	621	224.9	30	1.3e-60
AHX12843.1	18	163	BAC0073cnrH	191	33	189	65.1	34.4	5.8e-13
AHX12847.1	1	91	BAC0475dmeR	90	1	90	78.6	40.7	2.8e-17
AHX12848.1	12	222	BAC0604wtpC	344	2	212	132.1	37.4	7.5e-33
AHX12864.1	3	171	BAC0089corR	466	6	184	63.9	32.2	1.9e-12
AHX12866.1	21	219	BAC0162fbpC	356	27	224	106.3	33.3	3.2e-25
AHX12878.1	1	599	sp|P0A5B9|DNAK_MYCTU	625	1	577	634	57.1	1.2e-183
AHX12954.1	50	116	BAC0288nrsR	234	49	115	42.4	34.3	5.5e-06
AHX12966.1	347	514	BAC0465znuC/yebM	251	15	184	89.7	36.2	8.9e-20
AHX12974.1	6	91	BAC0089corR	466	20	104	46.2	33.3	3.3e-07
AHX12984.1	3	115	BAC0585arsC	141	4	116	100.9	47.8	6.8e-24
AHX12992.1	2	910	BAC0003acn	943	6	939	1121.3	59.6	0
AHX13101.1	8	728	BAC0101ctpV	770	33	762	281.6	30.3	1.8e-77
AHX13163.1	1	601	BAC0302pbrT	630	23	625	557.8	50.7	1.1e-160
AHX13177.1	4	82	BAC0366smtB/ziaR	122	33	110	56.2	41.8	1.8e-10
AHX13201.1	8	441	BAC0467zraR/hydH	441	8	441	266.2	38	4.7e-73
AHX13208.1	19	408	BAC0251mntH/yfeP	412	22	408	330.9	46.6	1.4e-92
AHX13236.1	24	89	BAC0201kmtR	130	20	84	46.6	42.4	1.5e-07
AHX13243.1	7	229	BAC0162fbpC	356	10	231	115.9	31.4	4.2e-28
AHX13264.1	15	131	BAC0089corR	466	5	121	47	31.4	1.3e-07
AHX13271.1	562	678	BAC0089corR	466	3	118	62.8	31.6	1.2e-11
AHX13272.1	33	147	BAC0089corR	466	6	120	55.8	33.1	3.3e-10
AHX13302.1	19	822	BAC0087mgtA	898	99	896	786.6	52.4	1.9e-229
AHX13319.1	14	240	BAC0719copR	230	2	221	137.5	37.7	1.4e-34
AHX13320.1	29	223	BAC0162fbpC	356	31	224	112.1	34.2	5.9e-27
AHX13338.1	1	1036	BAC0107cusA/ybdE	1047	1	1038	1244.6	62.1	0
AHX13339.1	11	403	BAC0108cusB	407	4	398	244.2	39.2	1.8e-66
AHX13349.1	8	789	BAC0012actP	827	21	822	484.2	39.6	2e-138
AHX13353.1	35	100	BAC0110cusF/cusX	110	33	98	53.1	37.9	1.6e-09
AHX13356.1	136	390	BAC0718copB	326	55	326	243	47.4	3.7e-66
AHX13357.1	7	588	BAC0716copA	619	11	619	760	60.7	1.4e-221
AHX13411.1	7	588	BAC0716copA	619	11	619	760	60.7	1.4e-221
AHX13412.1	136	390	BAC0718copB	326	55	326	243	47.4	3.7e-66
AHX13415.1	35	100	BAC0110cusF/cusX	110	33	98	53.1	37.9	1.6e-09
AHX13419.1	8	789	BAC0012actP	827	21	822	484.2	39.6	2e-138
AHX13428.1	11	403	BAC0108cusB	407	4	398	244.2	39.2	1.8e-66
AHX13429.1	1	1036	BAC0107cusA/ybdE	1047	1	1038	1244.6	62.1	0
AHX13446.1	1	198	BAC0076comR/ycfQ	210	1	198	100.9	31.5	1.2e-23
AHX13499.1	5	446	BAC0651merA	547	86	526	259.6	33.1	4.6e-71
AHX13504.1	9	463	BAC0374srpC	470	6	470	253.1	34.6	4.4e-69
AHX13505.1	3	1025	BAC0563acrD	1037	1	1023	733	40.9	3.2e-213
AHX13548.1	163	284	sp|P0A5B9|DNAK_MYCTU	625	91	205	53.5	31.7	5e-09
AHX13571.1	1	219	BAC0197irlR	229	1	219	174.9	45	7e-46
AHX13597.1	8	462	BAC0374srpC	470	13	465	166.4	30.5	5.4e-43
AHX13600.1	1	223	BAC0125czcR	225	1	223	303.9	66.4	1e-84
AHX13601.1	4	465	BAC0126czcS	476	10	457	254.6	34.8	1.5e-69
AHX13610.1	20	582	BAC0432ybtP	600	16	575	227.3	31.9	3.2e-61
AHX13611.1	1	210	BAC0114cutC	248	3	210	151.8	41.9	7e-39
AHX13615.1	6	181	BAC0538chrR	186	10	178	86.3	32.2	2.8e-19
AHX13622.1	19	142	BAC0638copR	231	1	121	48.1	30.4	1.1e-07
AHX13721.1	3	338	BAC0604wtpC	344	2	332	206.8	37.4	2.8e-55
AHX13722.1	67	272	BAC0599modB	233	20	222	116.3	34	3.9e-28
AHX13723.1	46	268	BAC0599modB	233	8	230	110.2	33.6	2.7e-26
AHX13747.1	1	754	BAC0568actP	841	41	841	807.7	56	7.4e-236
AHX13748.1	8	139	BAC0182golS	154	1	131	100.9	43.2	8.3e-24
AHX13764.1	298	599	BAC0432ybtP	600	286	577	203.8	39.1	4e-54
AHX13791.1	155	449	BAC0091corS	491	200	487	114.8	31.6	1.8e-27
AHX13792.1	3	223	BAC0125czcR	225	2	219	142.1	38.9	5.2e-36
AHX13801.1	37	319	BAC0459zitB/ybgR	313	19	299	239.2	45.4	4.5e-65
AHX13803.1	29	167	BAC0470zur/yjbK	171	7	146	126.3	45	2.2e-31
AHX13809.1	87	173	BAC0299pbrB/pbrC	358	97	181	42.4	37.6	4.5e-06
AHX13837.1	3	161	BAC0538chrR	186	7	169	67.8	32.5	9.9e-14
AHX13840.1	14	75	BAC0557ycnK	190	2	63	43.9	37.1	2.3e-06
AHX13847.1	1	218	BAC0487pmrA	222	1	218	167.9	40.8	8.7e-44
AHX13848.1	176	445	BAC0637copS	462	167	439	117.1	30	3.7e-28
AHX13856.1	8	339	BAC0318pstS	346	8	338	325.9	49.2	3.8e-91
AHX13857.1	25	337	BAC0317pstC	319	16	317	298.5	52.7	6.5e-83
AHX13858.1	10	287	BAC0315pstA	296	22	294	251.1	48.2	1e-68
AHX13859.1	21	271	BAC0316pstB	257	7	257	378.3	71.3	5.2e-107
AHX13872.1	8	362	BAC0611modC	352	2	352	218.8	37.8	7e-59
AHX13873.1	14	219	BAC0599modB	233	20	218	140.2	43	2e-35
AHX13874.1	1	252	BAC0598modA	269	19	269	103.2	30.2	3e-24
AHX13920.1	3	113	BAC0090corR/coaR	370	6	120	58.5	37.4	1.1e-10
AHX13929.1	746	940	BAC0488pmrB	364	135	332	57.8	30	6.3e-10
AHX13952.1	8	196	BAC0076comR/ycfQ	210	14	204	84.7	30.4	8.6e-19
AHX13967.1	536	655	BAC0089corR	466	2	123	51.6	30.6	2.7e-08
AHX13986.1	2	306	BAC0733pcoD	307	1	305	227.6	45.9	1.3e-61
AHX13987.1	1	126	BAC0735pcoC	127	1	127	115.2	50.4	3.8e-28
AHX13996.1	7	237	BAC0197irlR	229	3	221	122.1	34.9	6.1e-30
AHX14003.1	367	526	BAC0274nikE	268	33	195	53.9	30.6	4.8e-09
AHX14030.1	7	258	BAC0452yqjH	254	9	254	159.5	36.9	3.7e-41
AHX14035.1	42	320	BAC0718copB	326	49	325	229.9	44.9	2.7e-62
AHX14036.1	13	574	BAC0077copA	609	7	607	682.2	57.5	3.6e-198
AHX14043.1	533	970	BAC0356recG	691	199	643	218.4	35.2	2.9e-58
AHX14069.1	1	215	BAC0465znuC/yebM	251	4	204	96.3	30.3	4.5e-22
AHX14071.1	35	164	BAC0638copR	231	32	162	60.8	32.6	1.4e-11
AHX14107.1	8	262	BAC0608modE	262	7	260	137.5	37	1.5e-34
AHX14164.1	3	527	sp|P0A5B9|DNAK_MYCTU	625	5	531	314.7	36.9	1.5e-87
AHX14176.1	5	116	BAC0125czcR	225	4	113	51.2	33.3	1.4e-08
AHX14247.1	9	157	BAC0137dsbB	176	12	158	57	33.1	1.6e-10
AHX14335.1	4	108	BAC0197irlR	229	1	101	43.1	30.5	5.3e-06
AHX14342.1	4	119	BAC0467zraR/hydH	441	8	121	77.8	37.1	6.4e-17
AHX14376.1	403	514	BAC0468zraS/hydG	465	376	458	53.5	33	7.1e-09
AHX14378.1	5	130	BAC0111cusR/ylcA	227	1	121	67.4	30.2	9.7e-14
AHX14397.1	130	468	BAC0089corR	466	144	458	260	42.9	3.6e-71
AHX14457.1	1	236	BAC0604wtpC	344	1	234	140.6	36.4	1.6e-35
AHX14503.1	8	215	BAC0490G2alt	221	5	207	103.2	34.7	2.7e-24
AHX14512.1	5	344	BAC0355ruvB	352	6	348	462.2	68.5	3.5e-132
AHX14546.1	309	532	BAC0091corS	491	272	486	111.7	33.5	1.8e-26
AHX14555.1	5	466	BAC0089corR	466	6	457	303.1	40.3	3.6e-84
AHX14556.1	60	133	BAC0753copR	227	47	121	43.1	34.7	7.6e-06
AHX14557.1	56	134	BAC0083copR	227	33	115	49.7	31.8	2.3e-08
AHX14575.1	9	236	BAC0719copR	230	3	225	154.1	40.2	1.4e-39
AHX14581.1	3	120	BAC0581arsC	139	8	121	65.5	33.9	4.3e-13
AHX14582.1	1	350	BAC0579arsB	383	16	375	250.8	43.1	1.6e-68
AHX14601.1	8	225	BAC0719copR	230	3	219	158.3	40.6	7.2e-41
AHX14602.1	665	880	BAC0126czcS	476	241	454	86.7	33.5	1e-18
AHX14606.1	90	580	BAC0101ctpV	770	242	713	188.3	30.8	1.9e-49
AHX14623.1	5	127	BAC0644corD	125	3	125	138.3	48	4.2e-35
AHX14678.1	1	223	BAC0719copR	230	1	224	182.2	42.4	4.6e-48
AHX14719.1	10	257	BAC0400troB	266	6	240	94.4	32.8	1.5e-21
AHX14726.1	5	467	BAC0374srpC	470	2	465	174.9	30	1.6e-45
AHX14730.1	3	221	BAC0197irlR	229	2	219	191.8	47	5.9e-51
AHX14735.1	11	216	BAC0274nikE	268	18	231	112.8	36.4	3.4e-27
AHX14797.1	132	588	BAC0224merA	631	173	626	220.3	30.3	4e-59
AHX14819.1	25	394	BAC0285nreB	416	22	400	201.8	36.7	1e-53
AHX14823.1	6	399	BAC0293ruvB	397	3	397	444.5	56.5	1.7e-126
AHX14833.1	1	218	BAC0487pmrA	222	1	216	176.4	43.1	2.4e-46
AHX14834.1	154	444	BAC0112cusS	480	188	480	125.6	30.7	9.9e-31
AHX14837.1	5	115	BAC0125czcR	225	3	113	52	31.6	8.2e-09
AHX14872.1	2	886	BAC0087mgtA	898	23	896	898.7	53.8	3.7e-263
AHX14899.1	14	126	BAC0688merR2	144	8	117	58.9	36	4.4e-11
AHX14910.1	173	454	BAC0488pmrB	364	72	347	123.6	33.6	3.9e-30
AHX14911.1	1	218	BAC0487pmrA	222	1	218	167.5	41.3	1.1e-43
AHX14918.1	13	475	BAC0343silC	461	7	459	185.3	30.8	1.2e-48
AHX14951.1	7	1023	BAC0647mdtC	1026	7	1016	776.9	45.1	1.9e-226
AHX14952.1	2	1063	BAC0646mdtB	1040	11	1032	952.2	50.7	3.5e-279
AHX14953.1	66	409	BAC0645mdtA	413	69	412	237.3	39.6	2.2e-64
AHX14978.1	466	617	BAC0204cnrB	395	117	280	48.5	30.8	2.4e-07
AHX15015.1	315	400	BAC0080copJ	174	61	156	44.7	32	2.2e-06
AHX15034.1	33	216	BAC0604wtpC	344	26	209	89.4	33.5	4.4e-20
AHX15052.1	63	167	BAC0035arsM	283	78	181	57.8	35.2	1.4e-10
AHX15151.1	1	149	BAC0048bfrA	159	1	149	133.7	46.3	1.3e-33
AHX15227.1	17	1040	BAC0119czcA	1063	1	1044	661.8	36.5	9e-192
AHX15228.1	72	349	BAC0460zneB/hmxB	385	95	365	105.9	32.7	6.8e-25
AHX15236.1	42	253	BAC0162fbpC	356	14	226	131	32.7	1.5e-32
AHX15239.1	1	1025	BAC0647mdtC	1026	1	1007	709.5	43.4	3.8e-206
AHX15240.1	1	1023	BAC0647mdtC	1026	1	1007	729.2	44.1	4.6e-212
AHX15310.1	782	1010	BAC0289nrsS	454	213	445	75.9	30	2.3e-15
AHX15348.1	42	124	BAC0022aioR/aoxR	442	37	127	45.4	31.9	7.4e-07
AHX15354.1	3	1038	BAC0563acrD	1037	1	1027	711.8	40.4	7.8e-207
AHX15364.1	670	787	BAC0433ybtQ	600	457	568	57.8	31.9	4.6e-10
AHX15367.1	124	332	BAC0468zraS/hydG	465	251	456	99.8	30.1	4.4e-23
AHX15368.1	3	455	BAC0467zraR/hydH	441	1	439	313.2	43.3	3.5e-87
AHX15423.1	44	148	BAC0035arsM	283	75	182	59.7	35.2	4.4e-11
AHX15464.1	22	339	BAC0604wtpC	344	18	325	191.8	35.9	9.2e-51
AHX15518.1	172	441	BAC0637copS	462	163	439	125.2	32.9	1.3e-30
AHX15519.1	1	221	BAC0487pmrA	222	1	221	158.3	39.8	6.9e-41
AHX15570.1	12	112	BAC0071cmtR	118	11	115	44.3	33	1.5e-06
AHX15578.1	9	220	BAC0607tupC	214	3	209	99	30.1	7.1e-23
AHX15586.1	2	210	BAC0607tupC	214	3	207	104	31	1.7e-24
AHX15603.1	47	188	BAC0035arsM	283	81	223	52	31.1	7.9e-09
AHX15672.1	10	104	BAC0113cutA	112	16	110	84.7	43.2	4.6e-19
AHX15696.1	37	182	BAC0048bfrA	159	7	146	59.7	31.3	2.9e-11
AHX15713.1	30	431	BAC0467zraR/hydH	441	27	435	276.9	39.8	2.7e-76
AHX15742.1	5	225	BAC0487pmrA	222	3	214	104.4	32.6	1.2e-24
AHX15803.1	12	224	BAC0604wtpC	344	1	215	108.2	33	1.2e-25
AHX15812.1	33	258	BAC0604wtpC	344	19	245	121.7	33.9	8.9e-30
AHX15821.1	20	703	BAC0356recG	691	8	688	835.5	63.9	3.1e-244
AHX15840.1	41	369	BAC0645mdtA	413	60	390	178.7	34.4	8.3e-47
AHX15841.1	1	1028	BAC0647mdtC	1026	1	1022	872.8	48.3	2.5e-255
AHX15846.1	2	224	BAC0162fbpC	356	9	226	117.5	32.6	1.4e-28
AHX15866.1	1	224	BAC0719copR	230	1	225	164.1	41.2	1.3e-42
AHX15867.1	214	382	BAC0289nrsS	454	222	398	62.8	30.6	7.6e-12
AHX15876.1	124	794	BAC0101ctpV	770	78	762	325.1	34.1	1.5e-90
AHX15882.1	312	489	BAC0465znuC/yebM	251	4	180	90.9	33.3	3.8e-20
AHX15990.1	10	229	BAC0162fbpC	356	11	227	114.4	33.8	1.4e-27
AHX16013.1	7	141	BAC0125czcR	225	2	132	67.4	30.9	2.4e-13
AHX16016.1	547	784	BAC0289nrsS	454	222	446	99.8	32.1	1.6e-22
AHX16032.1	24	722	BAC0169fpvA	815	112	815	433.3	37	3.6e-123
AHX16037.1	803	1040	BAC0289nrsS	454	209	450	88.2	30.7	4.7e-19
AHX16042.1	6	567	BAC0433ybtQ	600	15	576	209.9	30.4	5.2e-56
AHX16048.1	43	252	BAC0138dsbC	236	24	228	141	32.1	1.3e-35
AHX16147.1	1192	1317	BAC0125czcR	225	2	123	67.4	31.2	1e-12
AHX16236.1	236	469	BAC0468zraS/hydG	465	240	455	97.4	31.8	4e-22
AHX16278.1	162	377	BAC0289nrsS	454	232	446	100.5	30.4	3e-23
AHX16297.1	16	107	BAC0125czcR	225	131	222	56.6	33.7	9.6e-10

## Sheet: D_jiang SBZ_Unique MRG
Unique BacMet Metal Resistance Genes for Dyella jiangningensis SBZ 3-12 (BioProject: PRJEB16000)
gene.name	Count
acn	2
acrD	3
actP	3
aioR/aoxR	1
arsB	1
arsC	2
arsM	3
bfrA	2
chrC	1
chrR	3
cmtR	1
cnrB	1
cnrH	1
comR/ycfQ	2
copA	3
copB	3
copJ	1
copR	14
copS	2
corC	2
corD	1
corR	9
corR/coaR	1
corS	2
ctpV	4
cusA/ybdE	2
cusB	2
cusF/cusX	2
cusR/ylcA	1
cusS	1
cutA	1
cutC	1
czcA	1
czcR	10
czcS	2
dmeR	1
dsbB	1
dsbC	2
fbpC	8
fecE	1
fpvA	2
G2alt	1
golS	1
irlR	6
irlS	1
kmtR	2
mdtA	3
mdtB	1
mdtC	5
merA	4
merR2	1
mgtA	2
mntH/yfeP	1
modA	1
modB	3
modC	2
modE	1
nikE	5
nreB	1
nrsR	1
nrsS	9
pbrB/pbrC	2
pbrT	1
pcoC	1
pcoD	1
pgpA/ltpgpA	1
pmrA	5
pmrB	3
pstA	1
pstB	1
pstC	1
pstS	1
recG	3
ruvB	2
silC	1
smtB/ziaR	1
srpC	4
troB	1
tupC	4
wtpC	11
ybtP	2
ybtQ	3
ycnK	1
yqjH	1
zitB/ybgR	1
zneB/hmxB	1
znuC/yebM	7
zraR/hydH	5
zraS/hydG	3
zur/yjbK	1
MCY/DNAK	3
TOTAL:	230

## Sheet: D_jiang SBZ_MRG List Hits
All annotated BacMet metal resistance genes for Dyella jiangningensis SBZ 3-12 (BioProject: PRJEB16000)
ID	qstart	qend	sseqID	slen	sstart	send	bitscore	pident	evalue	gene.name	Count
AHX12399.1	34	860	BAC0003acn	943	36	942	732.3	43.2	4.5e-213	acn	2
AHX12992.1	2	910	BAC0003acn	943	6	939	1121.3	59.6	0	acn
AHX12657.1	1	1039	BAC0563acrD	1037	1	1028	920.6	47.6	1.1e-269	acrD	3
AHX13505.1	3	1025	BAC0563acrD	1037	1	1023	733	40.9	3.2e-213	acrD
AHX15354.1	3	1038	BAC0563acrD	1037	1	1027	711.8	40.4	7.8e-207	acrD
AHX13349.1	8	789	BAC0012actP	827	21	822	484.2	39.6	2e-138	actP	3
AHX13419.1	8	789	BAC0012actP	827	21	822	484.2	39.6	2e-138	actP
AHX13747.1	1	754	BAC0568actP	841	41	841	807.7	56	7.4e-236	actP
AHX15348.1	42	124	BAC0022aioR/aoxR	442	37	127	45.4	31.9	7.4e-07	aioR/aoxR	1
AHX14582.1	1	350	BAC0579arsB	383	16	375	250.8	43.1	1.6e-68	arsB	1
AHX12984.1	3	115	BAC0585arsC	141	4	116	100.9	47.8	6.8e-24	arsC	2
AHX14581.1	3	120	BAC0581arsC	139	8	121	65.5	33.9	4.3e-13	arsC
AHX15052.1	63	167	BAC0035arsM	283	78	181	57.8	35.2	1.4e-10	arsM	3
AHX15423.1	44	148	BAC0035arsM	283	75	182	59.7	35.2	4.4e-11	arsM
AHX15603.1	47	188	BAC0035arsM	283	81	223	52	31.1	7.9e-09	arsM
AHX15151.1	1	149	BAC0048bfrA	159	1	149	133.7	46.3	1.3e-33	bfrA	2
AHX15696.1	37	182	BAC0048bfrA	159	7	146	59.7	31.3	2.9e-11	bfrA
AHX12301.1	1	188	BAC0028chrC	202	1	189	75.9	30.6	3.9e-16	chrC	1
AHX12685.1	6	180	BAC0538chrR	186	7	181	179.5	48.9	2.4e-47	chrR	3
AHX13615.1	6	181	BAC0538chrR	186	10	178	86.3	32.2	2.8e-19	chrR
AHX13837.1	3	161	BAC0538chrR	186	7	169	67.8	32.5	9.9e-14	chrR
AHX15570.1	12	112	BAC0071cmtR	118	11	115	44.3	33	1.5e-06	cmtR	1
AHX14978.1	466	617	BAC0204cnrB	395	117	280	48.5	30.8	2.4e-07	cnrB	1
AHX12843.1	18	163	BAC0073cnrH	191	33	189	65.1	34.4	5.8e-13	cnrH	1
AHX13446.1	1	198	BAC0076comR/ycfQ	210	1	198	100.9	31.5	1.2e-23	comR/ycfQ	2
AHX13952.1	8	196	BAC0076comR/ycfQ	210	14	204	84.7	30.4	8.6e-19	comR/ycfQ
AHX13357.1	7	588	BAC0716copA	619	11	619	760	60.7	1.4e-221	copA	3
AHX13411.1	7	588	BAC0716copA	619	11	619	760	60.7	1.4e-221	copA
AHX14036.1	13	574	BAC0077copA	609	7	607	682.2	57.5	3.6e-198	copA
AHX13356.1	136	390	BAC0718copB	326	55	326	243	47.4	3.7e-66	copB	3
AHX13412.1	136	390	BAC0718copB	326	55	326	243	47.4	3.7e-66	copB
AHX14035.1	42	320	BAC0718copB	326	49	325	229.9	44.9	2.7e-62	copB
AHX15015.1	315	400	BAC0080copJ	174	61	156	44.7	32	2.2e-06	copJ	1
AHX11919.1	1	224	BAC0719copR	230	1	225	164.1	41.2	1.3e-42	copR	14
AHX12226.1	17	111	BAC0083copR	227	20	112	65.5	32.6	3.2e-13	copR
AHX12227.1	4	119	BAC0753copR	227	3	116	70.9	34.5	8.1e-15	copR
AHX12247.1	11	229	BAC0719copR	230	3	221	162.5	41.8	4e-42	copR
AHX12370.1	1	223	BAC0083copR	227	1	226	174.1	45.8	1.3e-45	copR
AHX13319.1	14	240	BAC0719copR	230	2	221	137.5	37.7	1.4e-34	copR
AHX13622.1	19	142	BAC0638copR	231	1	121	48.1	30.4	1.1e-07	copR
AHX14071.1	35	164	BAC0638copR	231	32	162	60.8	32.6	1.4e-11	copR
AHX14556.1	60	133	BAC0753copR	227	47	121	43.1	34.7	7.6e-06	copR
AHX14557.1	56	134	BAC0083copR	227	33	115	49.7	31.8	2.3e-08	copR
AHX14575.1	9	236	BAC0719copR	230	3	225	154.1	40.2	1.4e-39	copR
AHX14601.1	8	225	BAC0719copR	230	3	219	158.3	40.6	7.2e-41	copR
AHX14678.1	1	223	BAC0719copR	230	1	224	182.2	42.4	4.6e-48	copR
AHX15866.1	1	224	BAC0719copR	230	1	225	164.1	41.2	1.3e-42	copR
AHX13848.1	176	445	BAC0637copS	462	167	439	117.1	30	3.7e-28	copS	2
AHX15518.1	172	441	BAC0637copS	462	163	439	125.2	32.9	1.3e-30	copS
AHX12284.1	20	271	BAC0088corC	292	23	274	241.1	49	1e-65	corC	2
AHX12423.1	254	514	BAC0088corC	292	20	279	125.6	30.7	1.2e-30	corC
AHX14623.1	5	127	BAC0644corD	125	3	125	138.3	48	4.2e-35	corD	1
AHX12154.1	3	442	BAC0089corR	466	6	457	279.6	38.6	4.1e-77	corR	9
AHX12864.1	3	171	BAC0089corR	466	6	184	63.9	32.2	1.9e-12	corR
AHX12974.1	6	91	BAC0089corR	466	20	104	46.2	33.3	3.3e-07	corR
AHX13264.1	15	131	BAC0089corR	466	5	121	47	31.4	1.3e-07	corR
AHX13271.1	562	678	BAC0089corR	466	3	118	62.8	31.6	1.2e-11	corR
AHX13272.1	33	147	BAC0089corR	466	6	120	55.8	33.1	3.3e-10	corR
AHX13967.1	536	655	BAC0089corR	466	2	123	51.6	30.6	2.7e-08	corR
AHX14397.1	130	468	BAC0089corR	466	144	458	260	42.9	3.6e-71	corR
AHX14555.1	5	466	BAC0089corR	466	6	457	303.1	40.3	3.6e-84	corR
AHX13920.1	3	113	BAC0090corR/coaR	370	6	120	58.5	37.4	1.1e-10	corR/coaR	1
AHX13791.1	155	449	BAC0091corS	491	200	487	114.8	31.6	1.8e-27	corS	2
AHX14546.1	309	532	BAC0091corS	491	272	486	111.7	33.5	1.8e-26	corS
AHX11929.1	124	794	BAC0101ctpV	770	78	762	325.1	34.1	1.5e-90	ctpV	4
AHX13101.1	8	728	BAC0101ctpV	770	33	762	281.6	30.3	1.8e-77	ctpV
AHX14606.1	90	580	BAC0101ctpV	770	242	713	188.3	30.8	1.9e-49	ctpV
AHX15876.1	124	794	BAC0101ctpV	770	78	762	325.1	34.1	1.5e-90	ctpV
AHX13338.1	1	1036	BAC0107cusA/ybdE	1047	1	1038	1244.6	62.1	0	cusA/ybdE	2
AHX13429.1	1	1036	BAC0107cusA/ybdE	1047	1	1038	1244.6	62.1	0	cusA/ybdE
AHX13339.1	11	403	BAC0108cusB	407	4	398	244.2	39.2	1.8e-66	cusB	2
AHX13428.1	11	403	BAC0108cusB	407	4	398	244.2	39.2	1.8e-66	cusB
AHX13353.1	35	100	BAC0110cusF/cusX	110	33	98	53.1	37.9	1.6e-09	cusF/cusX	2
AHX13415.1	35	100	BAC0110cusF/cusX	110	33	98	53.1	37.9	1.6e-09	cusF/cusX
AHX14378.1	5	130	BAC0111cusR/ylcA	227	1	121	67.4	30.2	9.7e-14	cusR/ylcA	1
AHX14834.1	154	444	BAC0112cusS	480	188	480	125.6	30.7	9.9e-31	cusS	1
AHX15672.1	10	104	BAC0113cutA	112	16	110	84.7	43.2	4.6e-19	cutA	1
AHX13611.1	1	210	BAC0114cutC	248	3	210	151.8	41.9	7e-39	cutC	1
AHX15227.1	17	1040	BAC0119czcA	1063	1	1044	661.8	36.5	9e-192	czcA	1
AHX12067.1	7	141	BAC0125czcR	225	2	132	67.4	30.9	2.4e-13	czcR	10
AHX12230.1	1926	2045	BAC0125czcR	225	3	119	64.3	32.5	1.3e-11	czcR
AHX12574.1	31	167	BAC0125czcR	225	2	135	72.4	30.7	4.3e-15	czcR
AHX13600.1	1	223	BAC0125czcR	225	1	223	303.9	66.4	1e-84	czcR
AHX13792.1	3	223	BAC0125czcR	225	2	219	142.1	38.9	5.2e-36	czcR
AHX14176.1	5	116	BAC0125czcR	225	4	113	51.2	33.3	1.4e-08	czcR
AHX14837.1	5	115	BAC0125czcR	225	3	113	52	31.6	8.2e-09	czcR
AHX16013.1	7	141	BAC0125czcR	225	2	132	67.4	30.9	2.4e-13	czcR
AHX16147.1	1192	1317	BAC0125czcR	225	2	123	67.4	31.2	1e-12	czcR
AHX16297.1	16	107	BAC0125czcR	225	131	222	56.6	33.7	9.6e-10	czcR
AHX13601.1	4	465	BAC0126czcS	476	10	457	254.6	34.8	1.5e-69	czcS	2
AHX14602.1	665	880	BAC0126czcS	476	241	454	86.7	33.5	1e-18	czcS
AHX12847.1	1	91	BAC0475dmeR	90	1	90	78.6	40.7	2.8e-17	dmeR	1
AHX14247.1	9	157	BAC0137dsbB	176	12	158	57	33.1	1.6e-10	dsbB	1
AHX12102.1	43	252	BAC0138dsbC	236	24	228	141	32.1	1.3e-35	dsbC	2
AHX16048.1	43	252	BAC0138dsbC	236	24	228	141	32.1	1.3e-35	dsbC
AHX11899.1	2	224	BAC0162fbpC	356	9	226	117.5	32.6	1.4e-28	fbpC	8
AHX12044.1	10	229	BAC0162fbpC	356	11	227	114.4	33.8	1.4e-27	fbpC
AHX12866.1	21	219	BAC0162fbpC	356	27	224	106.3	33.3	3.2e-25	fbpC
AHX13243.1	7	229	BAC0162fbpC	356	10	231	115.9	31.4	4.2e-28	fbpC
AHX13320.1	29	223	BAC0162fbpC	356	31	224	112.1	34.2	5.9e-27	fbpC
AHX15236.1	42	253	BAC0162fbpC	356	14	226	131	32.7	1.5e-32	fbpC
AHX15846.1	2	224	BAC0162fbpC	356	9	226	117.5	32.6	1.4e-28	fbpC
AHX15990.1	10	229	BAC0162fbpC	356	11	227	114.4	33.8	1.4e-27	fbpC
AHX12632.1	828	929	BAC0164fecE	255	137	229	50.4	35.9	8.8e-08	fecE	1
AHX12086.1	24	722	BAC0169fpvA	815	112	815	433.3	37	3.6e-123	fpvA	2
AHX16032.1	24	722	BAC0169fpvA	815	112	815	433.3	37	3.6e-123	fpvA
AHX14503.1	8	215	BAC0490G2alt	221	5	207	103.2	34.7	2.7e-24	G2alt	1
AHX13748.1	8	139	BAC0182golS	154	1	131	100.9	43.2	8.3e-24	golS	1
AHX12599.1	4	223	BAC0197irlR	229	2	217	131.7	36.8	7.1e-33	irlR	6
AHX12806.1	3	119	BAC0197irlR	229	2	115	71.2	35	6e-15	irlR
AHX13571.1	1	219	BAC0197irlR	229	1	219	174.9	45	7e-46	irlR
AHX13996.1	7	237	BAC0197irlR	229	3	221	122.1	34.9	6.1e-30	irlR
AHX14335.1	4	108	BAC0197irlR	229	1	101	43.1	30.5	5.3e-06	irlR
AHX14730.1	3	221	BAC0197irlR	229	2	219	191.8	47	5.9e-51	irlR
AHX12155.1	354	437	BAC0198irlS	464	352	441	43.1	32.2	6.7e-06	irlS	1
AHX12654.1	6	75	BAC0201kmtR	130	18	87	52	45.7	9.6e-09	kmtR	2
AHX13236.1	24	89	BAC0201kmtR	130	20	84	46.6	42.4	1.5e-07	kmtR
AHX11893.1	41	369	BAC0645mdtA	413	60	390	178.7	34.4	8.3e-47	mdtA	3
AHX14953.1	66	409	BAC0645mdtA	413	69	412	237.3	39.6	2.2e-64	mdtA
AHX15840.1	41	369	BAC0645mdtA	413	60	390	178.7	34.4	8.3e-47	mdtA
AHX14952.1	2	1063	BAC0646mdtB	1040	11	1032	952.2	50.7	3.5e-279	mdtB	1
AHX11894.1	1	1028	BAC0647mdtC	1026	1	1022	872.8	48.3	2.5e-255	mdtC	5
AHX14951.1	7	1023	BAC0647mdtC	1026	7	1016	776.9	45.1	1.9e-226	mdtC
AHX15239.1	1	1025	BAC0647mdtC	1026	1	1007	709.5	43.4	3.8e-206	mdtC
AHX15240.1	1	1023	BAC0647mdtC	1026	1	1007	729.2	44.1	4.6e-212	mdtC
AHX15841.1	1	1028	BAC0647mdtC	1026	1	1022	872.8	48.3	2.5e-255	mdtC
AHX12446.1	5	446	BAC0651merA	547	86	530	216.9	31.2	3.3e-58	merA	4
AHX12809.1	5	467	BAC0224merA	631	170	621	224.9	30	1.3e-60	merA
AHX13499.1	5	446	BAC0651merA	547	86	526	259.6	33.1	4.6e-71	merA
AHX14797.1	132	588	BAC0224merA	631	173	626	220.3	30.3	4e-59	merA
AHX14899.1	14	126	BAC0688merR2	144	8	117	58.9	36	4.4e-11	merR2	1
AHX13302.1	19	822	BAC0087mgtA	898	99	896	786.6	52.4	1.9e-229	mgtA	2
AHX14872.1	2	886	BAC0087mgtA	898	23	896	898.7	53.8	3.7e-263	mgtA
AHX13208.1	19	408	BAC0251mntH/yfeP	412	22	408	330.9	46.6	1.4e-92	mntH/yfeP	1
AHX13874.1	1	252	BAC0598modA	269	19	269	103.2	30.2	3e-24	modA	1
AHX13722.1	67	272	BAC0599modB	233	20	222	116.3	34	3.9e-28	modB	3
AHX13723.1	46	268	BAC0599modB	233	8	230	110.2	33.6	2.7e-26	modB
AHX13873.1	14	219	BAC0599modB	233	20	218	140.2	43	2e-35	modB
AHX12718.1	31	169	BAC0600modC	253	22	174	56.2	31.6	3.5e-10	modC	2
AHX13872.1	8	362	BAC0611modC	352	2	352	218.8	37.8	7e-59	modC
AHX14107.1	8	262	BAC0608modE	262	7	260	137.5	37	1.5e-34	modE	1
AHX12245.1	1	191	BAC0274nikE	268	35	231	102.1	37.7	5.3e-24	nikE	5
AHX12351.1	16	227	BAC0274nikE	268	27	233	70.5	30.1	2.2e-14	nikE
AHX12361.1	21	237	BAC0274nikE	268	24	244	118.6	37.4	6.6e-29	nikE
AHX14003.1	367	526	BAC0274nikE	268	33	195	53.9	30.6	4.8e-09	nikE
AHX14735.1	11	216	BAC0274nikE	268	18	231	112.8	36.4	3.4e-27	nikE
AHX14819.1	25	394	BAC0285nreB	416	22	400	201.8	36.7	1e-53	nreB	1
AHX12954.1	50	116	BAC0288nrsR	234	49	115	42.4	34.3	5.5e-06	nrsR	1
AHX11920.1	214	382	BAC0289nrsS	454	222	398	62.8	30.6	7.6e-12	nrsS	9
AHX12070.1	547	784	BAC0289nrsS	454	222	446	99.8	32.1	1.6e-22	nrsS
AHX12091.1	803	1040	BAC0289nrsS	454	209	450	88.2	30.7	4.7e-19	nrsS
AHX12598.1	192	405	BAC0289nrsS	454	222	441	129.8	35	5e-32	nrsS
AHX15310.1	782	1010	BAC0289nrsS	454	213	445	75.9	30	2.3e-15	nrsS
AHX15867.1	214	382	BAC0289nrsS	454	222	398	62.8	30.6	7.6e-12	nrsS
AHX16016.1	547	784	BAC0289nrsS	454	222	446	99.8	32.1	1.6e-22	nrsS
AHX16037.1	803	1040	BAC0289nrsS	454	209	450	88.2	30.7	4.7e-19	nrsS
AHX16278.1	162	377	BAC0289nrsS	454	232	446	100.5	30.4	3e-23	nrsS
AHX12641.1	9	153	BAC0299pbrB/pbrC	358	203	343	91.7	43.4	5.8e-21	pbrB/pbrC	2
AHX13809.1	87	173	BAC0299pbrB/pbrC	358	97	181	42.4	37.6	4.5e-06	pbrB/pbrC
AHX13163.1	1	601	BAC0302pbrT	630	23	625	557.8	50.7	1.1e-160	pbrT	1
AHX13987.1	1	126	BAC0735pcoC	127	1	127	115.2	50.4	3.8e-28	pcoC	1
AHX13986.1	2	306	BAC0733pcoD	307	1	305	227.6	45.9	1.3e-61	pcoD	1
AHX12742.1	346	587	BAC0311pgpA/ltpgpA	1548	1284	1517	132.5	35.4	1.1e-32	pgpA/ltpgpA	1
AHX13847.1	1	218	BAC0487pmrA	222	1	218	167.9	40.8	8.7e-44	pmrA	5
AHX14833.1	1	218	BAC0487pmrA	222	1	216	176.4	43.1	2.4e-46	pmrA
AHX14911.1	1	218	BAC0487pmrA	222	1	218	167.5	41.3	1.1e-43	pmrA
AHX15519.1	1	221	BAC0487pmrA	222	1	221	158.3	39.8	6.9e-41	pmrA
AHX15742.1	5	225	BAC0487pmrA	222	3	214	104.4	32.6	1.2e-24	pmrA
AHX12369.1	163	450	BAC0488pmrB	364	67	345	97.8	30.2	2.3e-22	pmrB	3
AHX13929.1	746	940	BAC0488pmrB	364	135	332	57.8	30	6.3e-10	pmrB
AHX14910.1	173	454	BAC0488pmrB	364	72	347	123.6	33.6	3.9e-30	pmrB
AHX13858.1	10	287	BAC0315pstA	296	22	294	251.1	48.2	1e-68	pstA	1
AHX13859.1	21	271	BAC0316pstB	257	7	257	378.3	71.3	5.2e-107	pstB	1
AHX13857.1	25	337	BAC0317pstC	319	16	317	298.5	52.7	6.5e-83	pstC	1
AHX13856.1	8	339	BAC0318pstS	346	8	338	325.9	49.2	3.8e-91	pstS	1
AHX11874.1	20	703	BAC0356recG	691	8	688	835.5	63.9	3.1e-244	recG	3
AHX14043.1	533	970	BAC0356recG	691	199	643	218.4	35.2	2.9e-58	recG
AHX15821.1	20	703	BAC0356recG	691	8	688	835.5	63.9	3.1e-244	recG
AHX14512.1	5	344	BAC0355ruvB	352	6	348	462.2	68.5	3.5e-132	ruvB	2
AHX14823.1	6	399	BAC0293ruvB	397	3	397	444.5	56.5	1.7e-126	ruvB
AHX14918.1	13	475	BAC0343silC	461	7	459	185.3	30.8	1.2e-48	silC	1
AHX13177.1	4	82	BAC0366smtB/ziaR	122	33	110	56.2	41.8	1.8e-10	smtB/ziaR	1
AHX12724.1	65	473	BAC0374srpC	470	60	465	142.5	30	8.8e-36	srpC	4
AHX13504.1	9	463	BAC0374srpC	470	6	470	253.1	34.6	4.4e-69	srpC
AHX13597.1	8	462	BAC0374srpC	470	13	465	166.4	30.5	5.4e-43	srpC
AHX14726.1	5	467	BAC0374srpC	470	2	465	174.9	30	1.6e-45	srpC
AHX14719.1	10	257	BAC0400troB	266	6	240	94.4	32.8	1.5e-21	troB	1
AHX12549.1	26	223	BAC0607tupC	214	23	210	130.2	37.4	3.1e-32	tupC	4
AHX12680.1	6	212	BAC0607tupC	214	8	212	106.3	31.9	4.3e-25	tupC
AHX15578.1	9	220	BAC0607tupC	214	3	209	99	30.1	7.1e-23	tupC
AHX15586.1	2	210	BAC0607tupC	214	3	207	104	31	1.7e-24	tupC
AHX11865.1	33	258	BAC0604wtpC	344	19	245	121.7	33.9	8.9e-30	wtpC	11
AHX12144.1	1	223	BAC0604wtpC	344	1	214	117.9	33.3	1.1e-28	wtpC
AHX12330.1	13	222	BAC0604wtpC	344	6	221	102.1	30.9	8e-24	wtpC
AHX12738.1	10	229	BAC0604wtpC	344	1	210	119.8	34.8	2.9e-29	wtpC
AHX12848.1	12	222	BAC0604wtpC	344	2	212	132.1	37.4	7.5e-33	wtpC
AHX13721.1	3	338	BAC0604wtpC	344	2	332	206.8	37.4	2.8e-55	wtpC
AHX14457.1	1	236	BAC0604wtpC	344	1	234	140.6	36.4	1.6e-35	wtpC
AHX15034.1	33	216	BAC0604wtpC	344	26	209	89.4	33.5	4.4e-20	wtpC
AHX15464.1	22	339	BAC0604wtpC	344	18	325	191.8	35.9	9.2e-51	wtpC
AHX15803.1	12	224	BAC0604wtpC	344	1	215	108.2	33	1.2e-25	wtpC
AHX15812.1	33	258	BAC0604wtpC	344	19	245	121.7	33.9	8.9e-30	wtpC
AHX13610.1	20	582	BAC0432ybtP	600	16	575	227.3	31.9	3.2e-61	ybtP	2
AHX13764.1	298	599	BAC0432ybtP	600	286	577	203.8	39.1	4e-54	ybtP
AHX12096.1	6	567	BAC0433ybtQ	600	15	576	209.9	30.4	5.2e-56	ybtQ	3
AHX15364.1	670	787	BAC0433ybtQ	600	457	568	57.8	31.9	4.6e-10	ybtQ
AHX16042.1	6	567	BAC0433ybtQ	600	15	576	209.9	30.4	5.2e-56	ybtQ
AHX13840.1	14	75	BAC0557ycnK	190	2	63	43.9	37.1	2.3e-06	ycnK	1
AHX14030.1	7	258	BAC0452yqjH	254	9	254	159.5	36.9	3.7e-41	yqjH	1
AHX13801.1	37	319	BAC0459zitB/ybgR	313	19	299	239.2	45.4	4.5e-65	zitB/ybgR	1
AHX15228.1	72	349	BAC0460zneB/hmxB	385	95	365	105.9	32.7	6.8e-25	zneB/hmxB	1
AHX11856.1	11	213	BAC0465znuC/yebM	251	3	194	95.5	30.2	7.9e-22	znuC/yebM	7
AHX11936.1	312	489	BAC0465znuC/yebM	251	4	180	90.9	33.3	3.8e-20	znuC/yebM
AHX12118.1	322	499	BAC0465znuC/yebM	251	4	180	85.5	31.9	1.4e-18	znuC/yebM
AHX12326.1	350	510	BAC0465znuC/yebM	251	21	184	58.9	32.9	1.4e-10	znuC/yebM
AHX12966.1	347	514	BAC0465znuC/yebM	251	15	184	89.7	36.2	8.9e-20	znuC/yebM
AHX14069.1	1	215	BAC0465znuC/yebM	251	4	204	96.3	30.3	4.5e-22	znuC/yebM
AHX15882.1	312	489	BAC0465znuC/yebM	251	4	180	90.9	33.3	3.8e-20	znuC/yebM
AHX12251.1	6	109	BAC0467zraR/hydH	441	8	111	77	37.5	1.7e-16	zraR/hydH	5
AHX13201.1	8	441	BAC0467zraR/hydH	441	8	441	266.2	38	4.7e-73	zraR/hydH
AHX14342.1	4	119	BAC0467zraR/hydH	441	8	121	77.8	37.1	6.4e-17	zraR/hydH
AHX15368.1	3	455	BAC0467zraR/hydH	441	1	439	313.2	43.3	3.5e-87	zraR/hydH
AHX15713.1	30	431	BAC0467zraR/hydH	441	27	435	276.9	39.8	2.7e-76	zraR/hydH
AHX14376.1	403	514	BAC0468zraS/hydG	465	376	458	53.5	33	7.1e-09	zraS/hydG	3
AHX15367.1	124	332	BAC0468zraS/hydG	465	251	456	99.8	30.1	4.4e-23	zraS/hydG
AHX16236.1	236	469	BAC0468zraS/hydG	465	240	455	97.4	31.8	4e-22	zraS/hydG
AHX13803.1	29	167	BAC0470zur/yjbK	171	7	146	126.3	45	2.2e-31	zur/yjbK	1
AHX12878.1	1	599	sp|P0A5B9|DNAK_MYCTU	625	1	577	634	57.1	1.2e-183	DNAK	3
AHX13548.1	163	284	sp|P0A5B9|DNAK_MYCTU	625	91	205	53.5	31.7	5e-09	DNAK
AHX14164.1	3	527	sp|P0A5B9|DNAK_MYCTU	625	5	531	314.7	36.9	1.5e-87	DNAK

## Sheet: D_terraeKACC Diamond Best Hits
Best DIAMOND hits for Dyella terrae KACC 12748 (BioProject: PRJNA523522)
qseqid	qstart	qend	sseqid	slen	sstart	send	bitscore	pident	evalue
lcl|SIZZ01000001.1_prot_TBR38704.1_29	9	157	BAC0137dsbB	176	12	158	47.4	29.8	1.3e-07
lcl|SIZZ01000001.1_prot_TBR38710.1_35	182	436	BAC0537copS	487	164	420	82.8	24.2	7.8e-18
lcl|SIZZ01000001.1_prot_TBR38710.1_35	182	439	BAC0112cusS	480	187	451	82.8	25.4	7.8e-18
lcl|SIZZ01000001.1_prot_TBR38710.1_35	1	439	BAC0637copS	462	1	427	81.6	22.9	1.7e-17
lcl|SIZZ01000001.1_prot_TBR38710.1_35	174	448	BAC0720copS	477	173	455	77	27	4.3e-16
lcl|SIZZ01000001.1_prot_TBR38710.1_35	184	458	BAC0488pmrB	364	75	344	75.1	27.1	1.6e-15
lcl|SIZZ01000001.1_prot_TBR38710.1_35	151	460	BAC0198irlS	464	137	452	73.9	24.1	3.6e-15
lcl|SIZZ01000001.1_prot_TBR38710.1_35	154	448	BAC0752copS	445	140	442	73.6	22.5	4.8e-15
lcl|SIZZ01000001.1_prot_TBR38710.1_35	182	445	BAC0348silS	497	188	462	73.2	25.7	6.2e-15
lcl|SIZZ01000001.1_prot_TBR38710.1_35	135	448	BAC0126czcS	476	114	433	67.8	24.9	2.6e-13
lcl|SIZZ01000001.1_prot_TBR38710.1_35	5	448	BAC0309pcoS	466	6	445	51.6	18.4	1.9e-08
lcl|SIZZ01000001.1_prot_TBR38711.1_36	1	220	BAC0719copR	230	1	221	154.8	42.2	7.6e-40
lcl|SIZZ01000001.1_prot_TBR38711.1_36	1	220	BAC0083copR	227	1	221	146	39.8	3.5e-37
lcl|SIZZ01000001.1_prot_TBR38711.1_36	1	220	BAC0125czcR	225	1	219	144.1	37.7	1.3e-36
lcl|SIZZ01000001.1_prot_TBR38711.1_36	1	220	BAC0197irlR	229	1	219	142.5	38.6	3.9e-36
lcl|SIZZ01000001.1_prot_TBR38711.1_36	1	220	BAC0753copR	227	1	221	142.5	38.5	3.9e-36
lcl|SIZZ01000001.1_prot_TBR38711.1_36	1	220	BAC0638copR	231	1	221	141.4	38.9	8.7e-36
lcl|SIZZ01000001.1_prot_TBR38711.1_36	1	220	BAC0487pmrA	222	1	216	136	38.2	3.6e-34
lcl|SIZZ01000001.1_prot_TBR38711.1_36	1	220	BAC0111cusR/ylcA	227	1	221	134	36.6	1.4e-33
lcl|SIZZ01000001.1_prot_TBR38711.1_36	2	220	BAC0308pcoR	226	3	221	130.6	33.8	1.5e-32
lcl|SIZZ01000001.1_prot_TBR38711.1_36	1	220	BAC0347silR	228	1	223	120.6	34.4	1.6e-29
lcl|SIZZ01000001.1_prot_TBR38711.1_36	1	218	BAC0288nrsR	234	1	228	119	34.2	4.6e-29
lcl|SIZZ01000001.1_prot_TBR38711.1_36	3	215	BAC0089corR	466	7	230	70.1	27.2	2.5e-14
lcl|SIZZ01000001.1_prot_TBR38711.1_36	2	218	BAC0095crdR	213	4	208	69.3	26.9	4.2e-14
lcl|SIZZ01000001.1_prot_TBR38711.1_36	3	112	BAC0467zraR/hydH	441	8	117	64.7	33.6	1e-12
lcl|SIZZ01000001.1_prot_TBR38797.1_127	35	164	BAC0638copR	231	32	162	60.8	32.6	1.4e-11
lcl|SIZZ01000001.1_prot_TBR38797.1_127	30	139	BAC0467zraR/hydH	441	32	144	53.9	29.2	1.8e-09
lcl|SIZZ01000001.1_prot_TBR38797.1_127	36	164	BAC0083copR	227	33	162	53.5	31.1	2.3e-09
lcl|SIZZ01000001.1_prot_TBR38797.1_127	3	104	BAC0089corR	466	6	104	52	32.4	6.7e-09
lcl|SIZZ01000001.1_prot_TBR38797.1_127	49	125	BAC0111cusR/ylcA	227	46	122	50.4	29.9	1.9e-08
lcl|SIZZ01000001.1_prot_TBR38797.1_127	2	204	BAC0487pmrA	222	1	209	50.4	27.4	1.9e-08
lcl|SIZZ01000001.1_prot_TBR38797.1_127	49	122	BAC0753copR	227	46	119	49.3	36.5	4.3e-08
lcl|SIZZ01000001.1_prot_TBR38797.1_127	49	118	BAC0308pcoR	226	47	116	48.1	32.9	9.6e-08
lcl|SIZZ01000001.1_prot_TBR38797.1_127	2	134	BAC0347silR	228	1	128	48.1	24.8	9.6e-08
lcl|SIZZ01000001.1_prot_TBR38797.1_127	23	116	BAC0125czcR	225	20	112	47.8	28.7	1.3e-07
lcl|SIZZ01000001.1_prot_TBR38797.1_127	4	129	BAC0288nrsR	234	3	128	47.4	25	1.6e-07
lcl|SIZZ01000001.1_prot_TBR38797.1_127	2	165	BAC0719copR	230	1	163	47.4	26.3	1.6e-07
lcl|SIZZ01000001.1_prot_TBR38797.1_127	35	122	BAC0197irlR	229	32	118	44.7	30.7	1.1e-06
lcl|SIZZ01000001.1_prot_TBR38797.1_127	36	115	BAC0022aioR/aoxR	442	38	118	35.4	24.4	0.00065
lcl|SIZZ01000001.1_prot_TBR38799.1_129	1	271	BAC0604wtpC	344	1	274	102.1	27.6	8.2e-24
lcl|SIZZ01000001.1_prot_TBR38799.1_129	2	209	BAC0607tupC	214	3	207	101.3	31	1.4e-23
lcl|SIZZ01000001.1_prot_TBR38799.1_129	2	218	BAC0164fecE	255	3	225	97.4	27.8	2e-22
lcl|SIZZ01000001.1_prot_TBR38799.1_129	1	215	BAC0465znuC/yebM	251	4	204	93.6	31.5	2.9e-21
lcl|SIZZ01000001.1_prot_TBR38799.1_129	2	212	BAC0400troB	266	11	223	87	28.1	2.7e-19
lcl|SIZZ01000001.1_prot_TBR38799.1_129	1	264	BAC0162fbpC	356	11	287	82.8	23.7	5.1e-18
lcl|SIZZ01000001.1_prot_TBR38799.1_129	29	211	BAC0611modC	352	26	209	75.9	30.9	6.3e-16
lcl|SIZZ01000001.1_prot_TBR38799.1_129	32	210	BAC0600modC	253	32	222	73.9	27.7	2.4e-15
lcl|SIZZ01000001.1_prot_TBR38799.1_129	15	217	BAC0440yfeB	296	25	230	73.9	30.5	2.4e-15
lcl|SIZZ01000001.1_prot_TBR38799.1_129	2	226	BAC0433ybtQ	600	344	571	67	24	2.9e-13
lcl|SIZZ01000001.1_prot_TBR38799.1_129	20	210	BAC0274nikE	268	31	231	65.9	27.4	6.5e-13
lcl|SIZZ01000001.1_prot_TBR38799.1_129	2	209	BAC0432ybtP	600	342	556	65.5	27.3	8.5e-13
lcl|SIZZ01000001.1_prot_TBR38799.1_129	20	210	BAC0273nikD	254	22	220	48.1	21.6	1.4e-07
lcl|SIZZ01000001.1_prot_TBR38820.1_153	532	969	BAC0356recG	691	199	643	222.6	34.7	1.5e-59
lcl|SIZZ01000001.1_prot_TBR38820.1_153	857	969	BAC0357recG	156	1	108	85.1	40.7	3.8e-18
lcl|SIZZ01000001.1_prot_TBR38824.1_157	9	289	BAC0167fieF/yiip	300	11	276	50.1	22.5	3.6e-08
lcl|SIZZ01000001.1_prot_TBR38847.1_184	21	271	BAC0316pstB	257	7	257	369	69.7	3.1e-104
lcl|SIZZ01000001.1_prot_TBR38847.1_184	25	266	BAC0162fbpC	356	12	246	117.1	29.4	2.1e-28
lcl|SIZZ01000001.1_prot_TBR38847.1_184	24	248	BAC0607tupC	214	2	211	112.8	33	4.1e-27
lcl|SIZZ01000001.1_prot_TBR38847.1_184	25	266	BAC0604wtpC	344	2	231	106.3	27.8	3.8e-25
lcl|SIZZ01000001.1_prot_TBR38847.1_184	25	255	BAC0164fecE	255	3	227	96.3	32.6	3.9e-22
lcl|SIZZ01000001.1_prot_TBR38847.1_184	31	246	BAC0274nikE	268	15	232	94.7	28.8	1.1e-21
lcl|SIZZ01000001.1_prot_TBR38847.1_184	9	246	BAC0433ybtQ	600	327	559	82.8	27.1	4.5e-18
lcl|SIZZ01000001.1_prot_TBR38847.1_184	25	234	BAC0400troB	266	11	211	77.4	29.9	1.9e-16
lcl|SIZZ01000001.1_prot_TBR38847.1_184	17	238	BAC0432ybtP	600	329	551	76.3	27.3	4.2e-16
lcl|SIZZ01000001.1_prot_TBR38847.1_184	36	254	BAC0611modC	352	11	217	75.9	27.7	5.5e-16
lcl|SIZZ01000001.1_prot_TBR38847.1_184	42	267	BAC0273nikD	254	21	242	74.3	27.4	1.6e-15
lcl|SIZZ01000001.1_prot_TBR38847.1_184	55	225	BAC0600modC	253	32	202	65.5	30.9	7.4e-13
lcl|SIZZ01000001.1_prot_TBR38847.1_184	33	234	BAC0440yfeB	296	20	214	61.6	25	1.1e-11
lcl|SIZZ01000001.1_prot_TBR38847.1_184	40	234	BAC0465znuC/yebM	251	20	189	57.4	22.8	2e-10
lcl|SIZZ01000001.1_prot_TBR38847.1_184	40	226	BAC0311pgpA/ltpgpA	1548	650	816	55.1	26.6	1e-09
lcl|SIZZ01000001.1_prot_TBR38848.1_185	9	286	BAC0315pstA	296	22	294	247.7	47.9	1.1e-67
lcl|SIZZ01000001.1_prot_TBR38848.1_185	15	286	BAC0317pstC	319	38	316	60.8	26.2	2e-11
lcl|SIZZ01000001.1_prot_TBR38848.1_185	67	281	BAC0610modB	229	10	215	41.2	27.5	1.6e-05
lcl|SIZZ01000001.1_prot_TBR38849.1_186	21	336	BAC0317pstC	319	14	317	308.5	53.8	6.3e-86
lcl|SIZZ01000001.1_prot_TBR38849.1_186	128	333	BAC0315pstA	296	78	295	53.9	24.2	2.8e-09
lcl|SIZZ01000001.1_prot_TBR38849.1_186	189	337	BAC0610modB	229	94	229	46.6	28.9	4.4e-07
lcl|SIZZ01000001.1_prot_TBR40636.1_187	6	336	BAC0318pstS	346	9	338	331.3	50	9e-93
lcl|SIZZ01000001.1_prot_TBR38890.1_232	93	179	BAC0299pbrB/pbrC	358	97	181	43.5	38.7	2.1e-06
lcl|SIZZ01000001.1_prot_TBR38897.1_239	36	167	BAC0470zur/yjbK	171	14	146	124.8	46.6	6.5e-31
lcl|SIZZ01000001.1_prot_TBR38900.1_242	35	320	BAC0459zitB/ybgR	313	19	300	219.9	44.3	2.8e-59
lcl|SIZZ01000001.1_prot_TBR38900.1_242	32	313	BAC0122czcD	316	12	293	214.9	42	8.9e-58
lcl|SIZZ01000001.1_prot_TBR38900.1_242	34	305	BAC0482dmeF	323	16	319	133.3	34.1	3.4e-33
lcl|SIZZ01000001.1_prot_TBR38900.1_242	34	306	BAC0132dmeF	382	50	362	100.1	29.9	3.2e-23
lcl|SIZZ01000001.1_prot_TBR38911.1_253	3	221	BAC0125czcR	225	2	219	145.6	39.7	4.7e-37
lcl|SIZZ01000001.1_prot_TBR38911.1_253	3	226	BAC0197irlR	229	2	224	136.3	38.4	2.9e-34
lcl|SIZZ01000001.1_prot_TBR38911.1_253	3	221	BAC0719copR	230	2	221	136	38.9	3.7e-34
lcl|SIZZ01000001.1_prot_TBR38911.1_253	3	221	BAC0083copR	227	2	221	135.2	38.5	6.4e-34
lcl|SIZZ01000001.1_prot_TBR38911.1_253	1	223	BAC0308pcoR	226	1	223	131	36.4	1.2e-32
lcl|SIZZ01000001.1_prot_TBR38911.1_253	3	221	BAC0638copR	231	2	221	130.6	39.8	1.6e-32
lcl|SIZZ01000001.1_prot_TBR38911.1_253	3	224	BAC0487pmrA	222	2	219	121.7	34.1	7.3e-30
lcl|SIZZ01000001.1_prot_TBR38911.1_253	3	221	BAC0753copR	227	2	221	119.8	36.2	2.8e-29
lcl|SIZZ01000001.1_prot_TBR38911.1_253	3	227	BAC0111cusR/ylcA	227	2	227	119	34.6	4.7e-29
lcl|SIZZ01000001.1_prot_TBR38911.1_253	3	223	BAC0288nrsR	234	2	232	112.5	35.3	4.4e-27
lcl|SIZZ01000001.1_prot_TBR38911.1_253	3	223	BAC0347silR	228	2	225	112.1	35	5.8e-27
lcl|SIZZ01000001.1_prot_TBR38911.1_253	3	113	BAC0095crdR	213	4	116	69.7	35.4	3.3e-14
lcl|SIZZ01000001.1_prot_TBR38911.1_253	4	183	BAC0089corR	466	7	180	62.8	30.1	4e-12
lcl|SIZZ01000001.1_prot_TBR38912.1_254	125	449	BAC0637copS	462	134	457	119	29.5	9.4e-29
lcl|SIZZ01000001.1_prot_TBR38912.1_254	125	432	BAC0309pcoS	466	141	450	114.8	29	1.8e-27
lcl|SIZZ01000001.1_prot_TBR38912.1_254	142	447	BAC0091corS	491	187	487	111.7	30.8	1.5e-26
lcl|SIZZ01000001.1_prot_TBR38912.1_254	111	448	BAC0126czcS	476	117	454	109	26.8	9.7e-26
lcl|SIZZ01000001.1_prot_TBR38912.1_254	120	430	BAC0752copS	445	134	445	105.9	24.8	8.2e-25
lcl|SIZZ01000001.1_prot_TBR38912.1_254	169	447	BAC0720copS	477	196	474	96.7	28.6	5e-22
lcl|SIZZ01000001.1_prot_TBR38912.1_254	164	436	BAC0112cusS	480	196	469	95.9	27.3	8.5e-22
lcl|SIZZ01000001.1_prot_TBR38912.1_254	161	434	BAC0488pmrB	364	80	341	93.2	29	5.5e-21
lcl|SIZZ01000001.1_prot_TBR38912.1_254	162	415	BAC0537copS	487	168	418	90.5	27	3.6e-20
lcl|SIZZ01000001.1_prot_TBR38912.1_254	240	448	BAC0289nrsS	454	232	446	84.3	30.1	2.6e-18
lcl|SIZZ01000001.1_prot_TBR38912.1_254	223	448	BAC0468zraS/hydG	465	237	456	84.3	27.1	2.6e-18
lcl|SIZZ01000001.1_prot_TBR38912.1_254	153	430	BAC0348silS	497	189	468	82.4	26	9.7e-18
lcl|SIZZ01000001.1_prot_TBR38912.1_254	161	428	BAC0198irlS	464	174	441	81.6	26.1	1.7e-17
lcl|SIZZ01000001.1_prot_TBR38959.1_305	6	222	BAC0607tupC	214	7	209	132.5	35.9	6.1e-33
lcl|SIZZ01000001.1_prot_TBR38959.1_305	20	242	BAC0316pstB	257	25	252	129	36.6	6.8e-32
lcl|SIZZ01000001.1_prot_TBR38959.1_305	21	246	BAC0162fbpC	356	27	250	124.8	29.6	1.3e-30
lcl|SIZZ01000001.1_prot_TBR38959.1_305	21	228	BAC0274nikE	268	28	238	123.6	39.3	2.8e-30
lcl|SIZZ01000001.1_prot_TBR38959.1_305	21	242	BAC0604wtpC	344	16	231	123.2	32.7	3.7e-30
lcl|SIZZ01000001.1_prot_TBR38959.1_305	33	258	BAC0611modC	352	26	247	115.2	31.8	1e-27
lcl|SIZZ01000001.1_prot_TBR38959.1_305	5	219	BAC0600modC	253	2	220	109.8	34.5	4.3e-26
lcl|SIZZ01000001.1_prot_TBR38959.1_305	20	225	BAC0432ybtP	600	359	561	94.4	33.8	1.8e-21
lcl|SIZZ01000001.1_prot_TBR38959.1_305	2	232	BAC0433ybtQ	600	344	569	94	30.9	2.4e-21
lcl|SIZZ01000001.1_prot_TBR38959.1_305	21	229	BAC0164fecE	255	18	225	92.8	27.4	5.4e-21
lcl|SIZZ01000001.1_prot_TBR38959.1_305	19	246	BAC0273nikD	254	17	245	88.2	32.6	1.3e-19
lcl|SIZZ01000001.1_prot_TBR38959.1_305	21	265	BAC0465znuC/yebM	251	20	243	83.6	29	3.3e-18
lcl|SIZZ01000001.1_prot_TBR38959.1_305	20	216	BAC0440yfeB	296	26	220	81.3	29.4	1.6e-17
lcl|SIZZ01000001.1_prot_TBR38959.1_305	19	230	BAC0400troB	266	24	230	79.3	29.9	6.2e-17
lcl|SIZZ01000001.1_prot_TBR38959.1_305	8	227	BAC0311pgpA/ltpgpA	1548	639	840	53.5	27.8	3.6e-09
lcl|SIZZ01000001.1_prot_TBR38978.1_329	31	152	BAC0197irlR	229	1	119	71.6	29.5	7e-15
lcl|SIZZ01000001.1_prot_TBR38978.1_329	31	151	BAC0638copR	231	1	119	71.2	28.1	9.2e-15
lcl|SIZZ01000001.1_prot_TBR38978.1_329	31	151	BAC0083copR	227	1	119	70.1	28.1	2e-14
lcl|SIZZ01000001.1_prot_TBR38978.1_329	31	146	BAC0125czcR	225	1	113	68.6	29.3	6e-14
lcl|SIZZ01000001.1_prot_TBR38978.1_329	31	151	BAC0753copR	227	1	119	68.2	28.1	7.8e-14
lcl|SIZZ01000001.1_prot_TBR38978.1_329	31	151	BAC0347silR	228	1	119	61.6	27.3	7.3e-12
lcl|SIZZ01000001.1_prot_TBR38978.1_329	31	156	BAC0719copR	230	1	124	60.1	23.8	2.1e-11
lcl|SIZZ01000001.1_prot_TBR38978.1_329	31	151	BAC0111cusR/ylcA	227	1	119	58.2	28.1	8e-11
lcl|SIZZ01000001.1_prot_TBR38978.1_329	32	175	BAC0308pcoR	226	3	141	57	24.3	1.8e-10
lcl|SIZZ01000001.1_prot_TBR38978.1_329	33	163	BAC0089corR	466	7	134	56.2	28.8	3.1e-10
lcl|SIZZ01000001.1_prot_TBR40650.1_338	1	315	BAC0132dmeF	382	28	361	310.5	56.4	1.6e-86
lcl|SIZZ01000001.1_prot_TBR40650.1_338	11	318	BAC0482dmeF	323	3	322	231.5	48.1	9.6e-63
lcl|SIZZ01000001.1_prot_TBR40650.1_338	11	318	BAC0122czcD	316	5	288	108.6	27.5	9.4e-26
lcl|SIZZ01000001.1_prot_TBR40650.1_338	11	315	BAC0459zitB/ybgR	313	3	289	102.4	29.5	6.7e-24
lcl|SIZZ01000001.1_prot_TBR38987.1_339	1	88	BAC0475dmeR	90	1	90	84.7	46.7	3.8e-19
lcl|SIZZ01000001.1_prot_TBR38987.1_339	1	88	BAC0332rcnR/yohL	90	1	90	70.1	41.1	9.8e-15
lcl|SIZZ01000001.1_prot_TBR38987.1_339	1	82	BAC0558csoR	101	10	88	43.1	32.5	1.3e-06
lcl|SIZZ01000001.1_prot_TBR38993.1_345	191	404	BAC0289nrsS	454	222	441	129.8	35	5e-32
lcl|SIZZ01000001.1_prot_TBR38993.1_345	178	407	BAC0198irlS	464	232	459	113.2	31.3	4.8e-27
lcl|SIZZ01000001.1_prot_TBR38993.1_345	186	403	BAC0112cusS	480	252	474	107.5	31.6	2.6e-25
lcl|SIZZ01000001.1_prot_TBR38993.1_345	195	396	BAC0348silS	497	265	473	104	32.1	2.9e-24
lcl|SIZZ01000001.1_prot_TBR38993.1_345	195	398	BAC0637copS	462	240	446	95.9	32.1	7.9e-22
lcl|SIZZ01000001.1_prot_TBR38993.1_345	178	395	BAC0720copS	477	246	462	94.4	29	2.3e-21
lcl|SIZZ01000001.1_prot_TBR38993.1_345	195	387	BAC0752copS	445	246	441	90.1	31.7	4.4e-20
lcl|SIZZ01000001.1_prot_TBR38993.1_345	195	396	BAC0309pcoS	466	250	453	87.4	29.6	2.8e-19
lcl|SIZZ01000001.1_prot_TBR38993.1_345	196	407	BAC0126czcS	476	239	452	86.3	27.8	6.3e-19
lcl|SIZZ01000001.1_prot_TBR38993.1_345	174	404	BAC0468zraS/hydG	465	227	451	79	28.4	1e-16
lcl|SIZZ01000001.1_prot_TBR38993.1_345	185	404	BAC0091corS	491	269	483	78.6	27.4	1.3e-16
lcl|SIZZ01000001.1_prot_TBR38993.1_345	190	390	BAC0488pmrB	364	139	336	73.9	31.9	3.2e-15
lcl|SIZZ01000001.1_prot_TBR38993.1_345	176	403	BAC0096crdS	397	178	387	63.9	29.3	3.3e-12
lcl|SIZZ01000001.1_prot_TBR38993.1_345	166	378	BAC0537copS	487	206	422	59.3	25.7	8.2e-11
lcl|SIZZ01000001.1_prot_TBR38994.1_346	4	223	BAC0197irlR	229	2	217	132.1	36.8	5.5e-33
lcl|SIZZ01000001.1_prot_TBR38994.1_346	4	227	BAC0719copR	230	2	223	129.8	33	2.7e-32
lcl|SIZZ01000001.1_prot_TBR38994.1_346	4	223	BAC0125czcR	225	2	217	127.9	36.2	1e-31
lcl|SIZZ01000001.1_prot_TBR38994.1_346	4	227	BAC0083copR	227	2	223	125.9	32.6	3.9e-31
lcl|SIZZ01000001.1_prot_TBR38994.1_346	4	223	BAC0753copR	227	2	219	123.2	34.8	2.5e-30
lcl|SIZZ01000001.1_prot_TBR38994.1_346	4	227	BAC0638copR	231	2	223	121.3	30.4	9.6e-30
lcl|SIZZ01000001.1_prot_TBR38994.1_346	4	223	BAC0111cusR/ylcA	227	2	219	120.2	33.2	2.1e-29
lcl|SIZZ01000001.1_prot_TBR38994.1_346	4	228	BAC0288nrsR	234	2	233	118.6	32.2	6.2e-29
lcl|SIZZ01000001.1_prot_TBR38994.1_346	3	223	BAC0308pcoR	226	2	219	114.4	32.6	1.2e-27
lcl|SIZZ01000001.1_prot_TBR38994.1_346	4	223	BAC0347silR	228	2	221	113.6	32.4	2e-27
lcl|SIZZ01000001.1_prot_TBR38994.1_346	4	223	BAC0487pmrA	222	2	214	110.5	31.8	1.7e-26
lcl|SIZZ01000001.1_prot_TBR38994.1_346	1	226	BAC0095crdR	213	1	211	80.5	27.9	1.9e-17
lcl|SIZZ01000001.1_prot_TBR38994.1_346	5	127	BAC0467zraR/hydH	441	8	128	54.3	29.3	1.4e-09
lcl|SIZZ01000001.1_prot_TBR39029.1_383	462	571	BAC0604wtpC	344	106	215	47.4	35.4	7.4e-07
lcl|SIZZ01000001.1_prot_TBR39029.1_383	828	924	BAC0164fecE	255	137	225	47	33.7	9.7e-07
lcl|SIZZ01000001.1_prot_TBR39029.1_383	470	547	BAC0400troB	266	128	202	47	34.6	9.7e-07
lcl|SIZZ01000001.1_prot_TBR39029.1_383	811	892	BAC0440yfeB	296	129	206	45.4	32.9	2.8e-06
lcl|SIZZ01000001.1_prot_TBR39029.1_383	830	928	BAC0465znuC/yebM	251	121	211	44.3	35.6	6.3e-06
lcl|SIZZ01000001.1_prot_TBR39029.1_383	602	651	BAC0311pgpA/ltpgpA	1548	630	677	37.4	44	0.00077
lcl|SIZZ01000001.1_prot_TBR39029.1_383	822	892	BAC0316pstB	257	146	212	37.4	32.4	0.00077
lcl|SIZZ01000001.1_prot_TBR39029.1_383	12	40	BAC0316pstB	257	24	52	34.3	51.7	0.0065
lcl|SIZZ01000001.1_prot_TBR39039.1_395	9	152	BAC0299pbrB/pbrC	358	203	342	86.7	42.4	1.9e-19
lcl|SIZZ01000001.1_prot_TBR39041.1_397	394	618	BAC0289nrsS	454	219	442	74.3	27.2	5.3e-15
lcl|SIZZ01000001.1_prot_TBR39041.1_397	755	874	BAC0638copR	231	2	119	69.7	32.5	1.3e-13
lcl|SIZZ01000001.1_prot_TBR39041.1_397	402	609	BAC0309pcoS	466	251	453	65.5	28.4	2.5e-12
lcl|SIZZ01000001.1_prot_TBR39041.1_397	401	645	BAC0126czcS	476	238	469	63.5	25.8	9.3e-12
lcl|SIZZ01000001.1_prot_TBR39041.1_397	755	886	BAC0083copR	227	2	131	60.8	28	6.1e-11
lcl|SIZZ01000001.1_prot_TBR39041.1_397	755	881	BAC0111cusR/ylcA	227	2	126	59.7	26	1.3e-10
lcl|SIZZ01000001.1_prot_TBR39041.1_397	755	881	BAC0347silR	228	2	126	55.8	25.2	1.9e-09
lcl|SIZZ01000001.1_prot_TBR39041.1_397	402	584	BAC0537copS	487	239	418	52	25.9	2.8e-08
lcl|SIZZ01000001.1_prot_TBR39041.1_397	754	867	BAC0095crdR	213	3	115	50.4	27.2	8.2e-08
lcl|SIZZ01000001.1_prot_TBR39041.1_397	756	857	BAC0089corR	466	7	105	43.9	27.5	7.7e-06
lcl|SIZZ01000001.1_prot_TBR39043.1_399	5	166	BAC0288nrsR	234	4	178	57.4	26.6	1.6e-10
lcl|SIZZ01000001.1_prot_TBR39043.1_399	5	120	BAC0753copR	227	4	117	57	28.4	2e-10
lcl|SIZZ01000001.1_prot_TBR39043.1_399	5	120	BAC0638copR	231	4	117	55.1	30.2	7.7e-10
lcl|SIZZ01000001.1_prot_TBR39043.1_399	35	120	BAC0308pcoR	226	33	118	54.7	31.4	1e-09
lcl|SIZZ01000001.1_prot_TBR39043.1_399	5	120	BAC0083copR	227	4	117	54.3	29.3	1.3e-09
lcl|SIZZ01000001.1_prot_TBR39043.1_399	5	111	BAC0125czcR	225	4	107	49.7	29	3.2e-08
lcl|SIZZ01000001.1_prot_TBR39043.1_399	5	166	BAC0719copR	230	4	169	48.1	23.8	9.5e-08
lcl|SIZZ01000001.1_prot_TBR39043.1_399	5	120	BAC0197irlR	229	4	116	47.8	29.3	1.2e-07
lcl|SIZZ01000001.1_prot_TBR39043.1_399	29	120	BAC0347silR	228	26	117	47.8	25	1.2e-07
lcl|SIZZ01000001.1_prot_TBR39043.1_399	5	120	BAC0111cusR/ylcA	227	4	117	45.4	25.9	6.1e-07
lcl|SIZZ01000001.1_prot_TBR39043.1_399	5	120	BAC0487pmrA	222	4	117	42.7	26.3	4e-06
lcl|SIZZ01000001.1_prot_430	3	126	BAC0432ybtP	600	360	483	120.6	46	9.3e-30
lcl|SIZZ01000001.1_prot_430	3	126	BAC0433ybtQ	600	361	484	87	37.1	1.1e-19
lcl|SIZZ01000001.1_prot_430	2	125	BAC0311pgpA/ltpgpA	1548	1302	1424	67.8	31.7	7.2e-14
lcl|SIZZ01000001.1_prot_430	3	84	BAC0604wtpC	344	16	96	64.3	42.2	7.9e-13
lcl|SIZZ01000001.1_prot_430	3	84	BAC0316pstB	257	26	114	56.2	36	2.2e-10
lcl|SIZZ01000001.1_prot_430	2	84	BAC0162fbpC	356	26	111	52.8	38.2	2.4e-09
lcl|SIZZ01000001.1_prot_430	2	130	BAC0274nikE	268	27	158	52.4	28.5	3.1e-09
lcl|SIZZ01000001.1_prot_430	2	70	BAC0164fecE	255	17	85	47.4	29	1e-07
lcl|SIZZ01000001.1_prot_430	15	110	BAC0611modC	352	26	126	46.2	28.7	2.2e-07
lcl|SIZZ01000001.1_prot_430	2	48	BAC0465znuC/yebM	251	19	65	46.2	38.3	2.2e-07
lcl|SIZZ01000001.1_prot_430	11	82	BAC0607tupC	214	26	92	44.7	31.9	6.5e-07
lcl|SIZZ01000001.1_prot_430	2	87	BAC0400troB	266	25	108	39.7	30.3	2.1e-05
lcl|SIZZ01000001.1_prot_430	5	44	BAC0440yfeB	296	29	68	36.2	42.5	0.00023
lcl|SIZZ01000001.1_prot_TBR39073.1_433	8	134	BAC0182golS	154	1	126	98.2	44.1	5.4e-23
lcl|SIZZ01000001.1_prot_TBR39073.1_433	1	138	BAC0686merR	144	1	136	95.1	37	4.5e-22
lcl|SIZZ01000001.1_prot_TBR39073.1_433	1	134	BAC0688merR2	144	1	132	94.4	37.3	7.8e-22
lcl|SIZZ01000001.1_prot_TBR39073.1_433	1	134	BAC0683merR1	144	1	132	92.4	37.3	2.9e-21
lcl|SIZZ01000001.1_prot_TBR39073.1_433	1	134	BAC0684merR2	144	1	132	92	37.3	3.9e-21
lcl|SIZZ01000001.1_prot_TBR39073.1_433	8	134	BAC0105cueR/ybbI	135	1	126	90.9	39.4	8.6e-21
lcl|SIZZ01000001.1_prot_TBR39073.1_433	1	136	BAC0689merR	151	1	134	90.9	38.4	8.6e-21
lcl|SIZZ01000001.1_prot_TBR39073.1_433	10	134	BAC0462zntR/yhdM	141	4	130	90.5	41.7	1.1e-20
lcl|SIZZ01000001.1_prot_TBR39073.1_433	1	134	BAC0232merR	144	1	132	89.7	36.6	1.9e-20
lcl|SIZZ01000001.1_prot_TBR39073.1_433	1	134	BAC0687merR	144	1	132	89.7	36.6	1.9e-20
lcl|SIZZ01000001.1_prot_TBR39073.1_433	10	135	BAC0682merR1	132	5	130	87	37.3	1.2e-19
lcl|SIZZ01000001.1_prot_TBR39073.1_433	7	134	BAC0301pbrR	150	3	130	81.6	35.9	5.2e-18
lcl|SIZZ01000001.1_prot_TBR39073.1_433	8	135	BAC0680merR	135	3	130	80.5	33.6	1.2e-17
lcl|SIZZ01000001.1_prot_TBR39073.1_433	8	134	BAC0058cadR	147	1	125	79.3	38.8	2.6e-17
lcl|SIZZ01000001.1_prot_TBR39073.1_433	8	133	BAC0090corR/coaR	370	6	126	51.6	31.2	5.8e-09
lcl|SIZZ01000001.1_prot_TBR39074.1_434	58	813	BAC0568actP	841	34	836	808.1	56.1	6.1e-236
lcl|SIZZ01000001.1_prot_TBR39074.1_434	58	818	BAC0346silP	824	41	822	785.4	54.2	4.2e-229
lcl|SIZZ01000001.1_prot_TBR39074.1_434	167	813	BAC0012actP	827	180	821	581.3	49.8	1.2e-167
lcl|SIZZ01000001.1_prot_TBR39074.1_434	148	815	BAC0183golT	762	81	748	576.2	49.8	3.9e-166
lcl|SIZZ01000001.1_prot_TBR39074.1_434	80	815	BAC0725copA	834	107	829	511.9	42.8	9.1e-147
lcl|SIZZ01000001.1_prot_TBR39074.1_434	195	816	BAC0078copA	802	196	801	494.6	46.2	1.5e-141
lcl|SIZZ01000001.1_prot_TBR39074.1_434	153	819	BAC0101ctpV	770	128	766	485.3	45.8	9.1e-139
lcl|SIZZ01000001.1_prot_TBR39074.1_434	156	813	BAC0102cueA	797	151	785	472.6	43.7	6.1e-135
lcl|SIZZ01000001.1_prot_TBR39074.1_434	195	817	BAC0622copA	804	126	730	459.1	42.8	7e-131
lcl|SIZZ01000001.1_prot_TBR39074.1_434	167	815	BAC0620copA	727	101	723	449.9	42.4	4.2e-128
lcl|SIZZ01000001.1_prot_TBR39074.1_434	202	813	BAC0624copA	732	129	715	394.4	39.6	2.1e-111
lcl|SIZZ01000001.1_prot_TBR39074.1_434	159	810	BAC0629copB	690	60	686	386.3	38.4	5.7e-109
lcl|SIZZ01000001.1_prot_TBR39074.1_434	159	813	BAC0079copB	745	105	744	379.8	36.7	5.4e-107
lcl|SIZZ01000001.1_prot_TBR39074.1_434	200	813	BAC0623copA	741	129	733	376.3	38.2	5.9e-106
lcl|SIZZ01000001.1_prot_TBR39074.1_434	200	813	BAC0617hpcopA	745	129	737	374.8	37.9	1.7e-105
lcl|SIZZ01000001.1_prot_TBR39147.1_510	3	195	BAC0400troB	266	2	201	82.4	26.2	4.6e-18
lcl|SIZZ01000001.1_prot_TBR39147.1_510	11	195	BAC0162fbpC	356	11	204	75.1	29.5	7.3e-16
lcl|SIZZ01000001.1_prot_TBR39147.1_510	35	192	BAC0607tupC	214	26	183	71.6	29.8	8.1e-15
lcl|SIZZ01000001.1_prot_TBR39147.1_510	11	179	BAC0465znuC/yebM	251	4	166	69.7	29.5	3.1e-14
lcl|SIZZ01000001.1_prot_TBR39147.1_510	11	195	BAC0604wtpC	344	1	189	67.4	29.3	1.5e-13
lcl|SIZZ01000001.1_prot_TBR39147.1_510	32	195	BAC0440yfeB	296	32	204	65.5	27.6	5.8e-13
lcl|SIZZ01000001.1_prot_TBR39147.1_510	16	195	BAC0274nikE	268	17	210	61.2	29.2	1.1e-11
lcl|SIZZ01000001.1_prot_TBR39147.1_510	30	169	BAC0611modC	352	17	160	57	30.7	2.1e-10
lcl|SIZZ01000001.1_prot_TBR39147.1_510	31	195	BAC0600modC	253	22	201	55.8	29.2	4.6e-10
lcl|SIZZ01000001.1_prot_TBR39147.1_510	30	169	BAC0432ybtP	600	363	512	49.7	26.3	3.3e-08
lcl|SIZZ01000001.1_prot_TBR39147.1_510	30	202	BAC0433ybtQ	600	364	545	43.1	23.4	3.1e-06
lcl|SIZZ01000001.1_prot_TBR39154.1_517	16	475	BAC0374srpC	470	5	467	146.4	30	6.2e-37
lcl|SIZZ01000001.1_prot_TBR39154.1_517	51	473	BAC0343silC	461	45	459	110.2	24.3	4.9e-26
lcl|SIZZ01000001.1_prot_TBR39165.1_532	32	230	BAC0604wtpC	344	16	209	114	35.5	1.6e-27
lcl|SIZZ01000001.1_prot_TBR39165.1_532	12	212	BAC0162fbpC	356	11	205	112.1	33.8	6e-27
lcl|SIZZ01000001.1_prot_TBR39165.1_532	12	232	BAC0274nikE	268	3	232	111.7	33.3	7.9e-27
lcl|SIZZ01000001.1_prot_TBR39165.1_532	13	232	BAC0607tupC	214	3	209	108.6	31.7	6.7e-26
lcl|SIZZ01000001.1_prot_TBR39165.1_532	46	228	BAC0611modC	352	28	205	90.9	30.5	1.4e-20
lcl|SIZZ01000001.1_prot_TBR39165.1_532	45	212	BAC0600modC	253	30	202	87.4	32.4	1.6e-19
lcl|SIZZ01000001.1_prot_TBR39165.1_532	31	229	BAC0465znuC/yebM	251	19	198	82	29.6	6.7e-18
lcl|SIZZ01000001.1_prot_TBR39165.1_532	31	228	BAC0164fecE	255	17	214	80.9	32.8	1.5e-17
lcl|SIZZ01000001.1_prot_TBR39165.1_532	35	233	BAC0273nikD	254	22	222	76.3	29.1	3.7e-16
lcl|SIZZ01000001.1_prot_TBR39165.1_532	31	232	BAC0400troB	266	25	223	74.3	32.2	1.4e-15
lcl|SIZZ01000001.1_prot_TBR39165.1_532	13	212	BAC0440yfeB	296	11	205	70.9	29.6	1.5e-14
lcl|SIZZ01000001.1_prot_TBR39165.1_532	32	232	BAC0316pstB	257	26	232	69.7	26.9	3.4e-14
lcl|SIZZ01000001.1_prot_TBR39165.1_532	21	232	BAC0432ybtP	600	343	558	68.6	29.2	7.6e-14
lcl|SIZZ01000001.1_prot_TBR39165.1_532	13	233	BAC0433ybtQ	600	344	560	62.8	26.8	4.2e-12
lcl|SIZZ01000001.1_prot_TBR39165.1_532	30	228	BAC0311pgpA/ltpgpA	1548	648	831	53.9	26.5	1.9e-09
lcl|SIZZ01000001.1_prot_TBR39168.1_536	32	583	BAC0433ybtQ	600	35	580	184.5	28.7	2.4e-48
lcl|SIZZ01000001.1_prot_TBR39168.1_536	71	579	BAC0432ybtP	600	62	575	175.6	30.2	1.1e-45
lcl|SIZZ01000001.1_prot_TBR39168.1_536	344	582	BAC0311pgpA/ltpgpA	1548	1284	1519	128.3	34.2	2e-31
lcl|SIZZ01000001.1_prot_TBR39168.1_536	358	575	BAC0162fbpC	356	22	239	97.4	31.2	3.8e-22
lcl|SIZZ01000001.1_prot_TBR39168.1_536	353	562	BAC0316pstB	257	16	232	90.1	30.5	6.1e-20
lcl|SIZZ01000001.1_prot_TBR39168.1_536	353	570	BAC0164fecE	255	8	226	87	27.6	5.2e-19
lcl|SIZZ01000001.1_prot_TBR39168.1_536	371	560	BAC0611modC	352	22	207	81.3	31.3	2.8e-17
lcl|SIZZ01000001.1_prot_TBR39168.1_536	363	564	BAC0604wtpC	344	16	213	75.9	26.5	1.2e-15
lcl|SIZZ01000001.1_prot_TBR39168.1_536	353	562	BAC0400troB	266	16	223	73.6	27	5.9e-15
lcl|SIZZ01000001.1_prot_TBR39168.1_536	373	562	BAC0607tupC	214	28	209	70.1	27.3	6.6e-14
lcl|SIZZ01000001.1_prot_TBR39168.1_536	363	564	BAC0273nikD	254	19	223	67.8	29.8	3.3e-13
lcl|SIZZ01000001.1_prot_TBR39168.1_536	363	562	BAC0274nikE	268	28	232	67.8	29.7	3.3e-13
lcl|SIZZ01000001.1_prot_TBR39168.1_536	343	557	BAC0440yfeB	296	8	221	66.2	26.8	9.5e-13
lcl|SIZZ01000001.1_prot_TBR39168.1_536	346	546	BAC0465znuC/yebM	251	5	184	59.7	26.3	8.9e-11
lcl|SIZZ01000001.1_prot_TBR39168.1_536	378	559	BAC0600modC	253	32	220	57	26.8	5.7e-10
lcl|SIZZ01000001.1_prot_TBR39229.1_601	3	119	BAC0197irlR	229	2	115	70.5	35	1e-14
lcl|SIZZ01000001.1_prot_TBR39229.1_601	1	119	BAC0308pcoR	226	1	117	66.6	36.1	1.5e-13
lcl|SIZZ01000001.1_prot_TBR39229.1_601	3	119	BAC0753copR	227	2	116	65.5	31.6	3.3e-13
lcl|SIZZ01000001.1_prot_TBR39229.1_601	3	119	BAC0083copR	227	2	116	64.3	29.9	7.4e-13
lcl|SIZZ01000001.1_prot_TBR39229.1_601	3	119	BAC0638copR	231	2	116	63.9	29.1	9.6e-13
lcl|SIZZ01000001.1_prot_TBR39229.1_601	3	119	BAC0125czcR	225	2	115	59.7	28.2	1.8e-11
lcl|SIZZ01000001.1_prot_TBR39229.1_601	3	119	BAC0719copR	230	2	116	59.7	29.1	1.8e-11
lcl|SIZZ01000001.1_prot_TBR39229.1_601	4	119	BAC0467zraR/hydH	441	8	121	55.8	30.2	2.6e-10
lcl|SIZZ01000001.1_prot_TBR39229.1_601	3	119	BAC0347silR	228	2	116	53.1	29.1	1.7e-09
lcl|SIZZ01000001.1_prot_TBR39229.1_601	3	119	BAC0111cusR/ylcA	227	2	116	52.8	28.2	2.2e-09
lcl|SIZZ01000001.1_prot_TBR39229.1_601	4	110	BAC0089corR	466	7	110	51.6	28	4.9e-09
lcl|SIZZ01000001.1_prot_TBR39229.1_601	3	116	BAC0095crdR	213	4	116	48.9	26.3	3.2e-08
lcl|SIZZ01000001.1_prot_TBR39229.1_601	3	105	BAC0022aioR/aoxR	442	7	108	41.6	28.6	5.1e-06
lcl|SIZZ01000001.1_prot_TBR39229.1_601	3	119	BAC0487pmrA	222	2	116	39.7	26.7	1.9e-05
lcl|SIZZ01000001.1_prot_TBR39232.1_604	4	472	BAC0651merA	547	85	537	214.2	28.7	2.3e-57
lcl|SIZZ01000001.1_prot_TBR39232.1_604	4	472	BAC0224merA	631	169	621	208.4	29.1	1.3e-55
lcl|SIZZ01000001.1_prot_TBR39232.1_604	3	472	BAC0649merA	568	100	558	203.4	30.5	4e-54
lcl|SIZZ01000001.1_prot_TBR39232.1_604	7	472	BAC0650merA	569	109	559	171.4	27.4	1.7e-44
lcl|SIZZ01000001.1_prot_TBR39232.1_604	7	472	BAC0653merA	562	102	552	171.4	27.9	1.7e-44
lcl|SIZZ01000001.1_prot_TBR39232.1_604	7	472	BAC0652merA	561	101	551	169.5	27.8	6.4e-44
lcl|SIZZ01000001.1_prot_TBR39232.1_604	7	297	BAC0648merA	460	101	395	77	24.9	4.4e-16
lcl|SIZZ01000001.1_prot_TBR39250.1_622	5	208	BAC0607tupC	214	3	207	82	27.1	8.1e-18
lcl|SIZZ01000001.1_prot_TBR39250.1_622	10	209	BAC0164fecE	255	8	217	63.2	24.6	3.9e-12
lcl|SIZZ01000001.1_prot_TBR39250.1_622	9	222	BAC0274nikE	268	17	241	62	24	8.6e-12
lcl|SIZZ01000001.1_prot_TBR39250.1_622	5	209	BAC0400troB	266	11	227	59.7	28.2	4.3e-11
lcl|SIZZ01000001.1_prot_TBR39250.1_622	2	212	BAC0162fbpC	356	9	229	58.9	24.4	7.3e-11
lcl|SIZZ01000001.1_prot_TBR39250.1_622	10	209	BAC0433ybtQ	600	349	558	57	26.6	2.8e-10
lcl|SIZZ01000001.1_prot_TBR39250.1_622	3	208	BAC0432ybtP	600	340	556	56.2	25.4	4.7e-10
lcl|SIZZ01000001.1_prot_TBR39250.1_622	4	279	BAC0604wtpC	344	1	276	55.8	25.3	6.2e-10
lcl|SIZZ01000001.1_prot_TBR39250.1_622	19	203	BAC0440yfeB	296	26	219	53.9	25	2.3e-09
lcl|SIZZ01000001.1_prot_TBR39250.1_622	1	162	BAC0465znuC/yebM	251	1	153	53.9	26.7	2.3e-09
lcl|SIZZ01000001.1_prot_TBR39250.1_622	23	237	BAC0273nikD	254	22	240	51.2	22.5	1.5e-08
lcl|SIZZ01000001.1_prot_TBR39250.1_622	19	215	BAC0316pstB	257	25	237	45.1	21.4	1.1e-06
lcl|SIZZ01000001.1_prot_TBR39250.1_622	32	208	BAC0611modC	352	26	207	41.6	24.2	1.2e-05
lcl|SIZZ01000001.1_prot_TBR39287.1_670	1	594	sp|P0A5B9|DNAK_MYCTU	625	1	572	633.6	57.1	1.6e-183
lcl|SIZZ01000001.1_prot_TBR39336.1_722	171	787	BAC0168fptA	720	79	694	151.4	23.9	3.1e-38
lcl|SIZZ01000001.1_prot_TBR39336.1_722	42	787	BAC0169fpvA	815	48	790	150.2	24.2	6.9e-38
lcl|SIZZ01000001.1_prot_TBR39339.1_725	148	715	BAC0101ctpV	770	166	757	256.1	31.9	7.9e-70
lcl|SIZZ01000001.1_prot_TBR39339.1_725	54	712	BAC0568actP	841	127	830	238.4	29.3	1.7e-64
lcl|SIZZ01000001.1_prot_TBR39339.1_725	43	712	BAC0078copA	802	91	792	233	26.1	7.2e-63
lcl|SIZZ01000001.1_prot_TBR39339.1_725	40	712	BAC0725copA	834	114	821	229.9	27.9	6.1e-62
lcl|SIZZ01000001.1_prot_TBR39339.1_725	43	722	BAC0620copA	727	24	725	224.2	26.6	3.3e-60
lcl|SIZZ01000001.1_prot_TBR39339.1_725	27	712	BAC0102cueA	797	73	779	223.4	28.6	5.7e-60
lcl|SIZZ01000001.1_prot_TBR39339.1_725	106	716	BAC0629copB	690	55	687	219.2	27.9	1.1e-58
lcl|SIZZ01000001.1_prot_TBR39339.1_725	148	712	BAC0346silP	824	201	811	214.2	28.5	3.5e-57
lcl|SIZZ01000001.1_prot_TBR39339.1_725	202	723	BAC0012actP	827	272	826	205.7	29.6	1.2e-54
lcl|SIZZ01000001.1_prot_TBR39339.1_725	121	715	BAC0622copA	804	102	722	205.3	29.1	1.6e-54
lcl|SIZZ01000001.1_prot_TBR39339.1_725	27	712	BAC0183golT	762	11	740	204.1	27	3.6e-54
lcl|SIZZ01000001.1_prot_TBR39339.1_725	43	718	BAC0624copA	732	20	715	185.7	24.4	1.3e-48
lcl|SIZZ01000001.1_prot_TBR39339.1_725	22	718	BAC0098ctpC	718	8	711	184.5	26.5	2.9e-48
lcl|SIZZ01000001.1_prot_TBR39339.1_725	152	711	BAC0383tcrB	710	114	698	184.5	27.3	2.9e-48
lcl|SIZZ01000001.1_prot_TBR39339.1_725	148	711	BAC0079copB	745	139	737	178.7	25.5	1.6e-46
lcl|SIZZ01000001.1_prot_TBR39350.1_736	5	445	BAC0651merA	547	86	526	238	29.7	1.4e-64
lcl|SIZZ01000001.1_prot_TBR39350.1_736	5	445	BAC0224merA	631	170	610	229.6	29.1	5e-62
lcl|SIZZ01000001.1_prot_TBR39350.1_736	9	452	BAC0650merA	569	111	555	200.7	28.8	2.5e-53
lcl|SIZZ01000001.1_prot_TBR39350.1_736	3	452	BAC0653merA	562	98	548	193.7	28.2	3.1e-51
lcl|SIZZ01000001.1_prot_TBR39350.1_736	9	452	BAC0652merA	561	103	547	193.4	28.2	4e-51
lcl|SIZZ01000001.1_prot_TBR39350.1_736	4	445	BAC0649merA	568	101	547	182.2	26	9.2e-48
lcl|SIZZ01000001.1_prot_TBR39350.1_736	9	246	BAC0648merA	460	103	349	124.8	31	1.7e-30
lcl|SIZZ01000001.1_prot_TBR39360.1_748	12	696	BAC0169fpvA	815	113	813	107.1	23.6	5.7e-25
lcl|SIZZ01000001.1_prot_TBR39380.1_768	1	155	BAC0467zraR/hydH	441	1	155	66.6	28.8	2.6e-13
lcl|SIZZ01000001.1_prot_TBR39380.1_768	1	123	BAC0022aioR/aoxR	442	1	124	60.5	29.4	1.8e-11
lcl|SIZZ01000001.1_prot_TBR39380.1_768	8	152	BAC0095crdR	213	5	154	58.9	29.8	5.4e-11
lcl|SIZZ01000001.1_prot_TBR39380.1_768	3	142	BAC0089corR	466	2	140	58.5	26.4	7e-11
lcl|SIZZ01000001.1_prot_TBR39380.1_768	10	117	BAC0111cusR/ylcA	227	5	112	54.7	27.8	1e-09
lcl|SIZZ01000001.1_prot_TBR39380.1_768	8	117	BAC0347silR	228	3	112	53.9	26.4	1.7e-09
lcl|SIZZ01000001.1_prot_TBR39380.1_768	10	156	BAC0487pmrA	222	5	162	50.8	28.8	1.5e-08
lcl|SIZZ01000001.1_prot_TBR39380.1_768	10	185	BAC0638copR	231	5	172	50.4	23.9	1.9e-08
lcl|SIZZ01000001.1_prot_TBR39380.1_768	8	194	BAC0753copR	227	3	182	47	24.2	2.1e-07
lcl|SIZZ01000001.1_prot_TBR39380.1_768	10	117	BAC0719copR	230	5	112	44.7	25	1e-06
lcl|SIZZ01000001.1_prot_TBR39380.1_768	54	161	BAC0288nrsR	234	51	152	44.3	28.7	1.4e-06
lcl|SIZZ01000001.1_prot_TBR39380.1_768	10	117	BAC0083copR	227	5	112	43.9	24.1	1.8e-06
lcl|SIZZ01000001.1_prot_TBR39380.1_768	8	147	BAC0308pcoR	226	4	140	43.9	21.4	1.8e-06
lcl|SIZZ01000001.1_prot_TBR39380.1_768	8	148	BAC0197irlR	229	3	139	40.8	22	1.5e-05
lcl|SIZZ01000001.1_prot_TBR39381.1_769	7	120	BAC0083copR	227	3	116	67.4	36	9.3e-14
lcl|SIZZ01000001.1_prot_TBR39381.1_769	7	120	BAC0638copR	231	3	116	65.1	33.3	4.6e-13
lcl|SIZZ01000001.1_prot_TBR39381.1_769	7	120	BAC0125czcR	225	3	115	57.8	34.2	7.4e-11
lcl|SIZZ01000001.1_prot_TBR39381.1_769	7	129	BAC0719copR	230	3	125	57.4	30.1	9.6e-11
lcl|SIZZ01000001.1_prot_TBR39381.1_769	7	120	BAC0347silR	228	3	116	57	35	1.3e-10
lcl|SIZZ01000001.1_prot_TBR39381.1_769	7	120	BAC0197irlR	229	3	115	56.2	31.6	2.1e-10
lcl|SIZZ01000001.1_prot_TBR39381.1_769	7	113	BAC0753copR	227	3	109	55.8	34.6	2.8e-10
lcl|SIZZ01000001.1_prot_TBR39381.1_769	7	120	BAC0111cusR/ylcA	227	3	116	53.5	30.8	1.4e-09
lcl|SIZZ01000001.1_prot_TBR39381.1_769	7	120	BAC0308pcoR	226	4	117	53.1	28.1	1.8e-09
lcl|SIZZ01000001.1_prot_TBR39382.1_770	774	1096	BAC0468zraS/hydG	465	139	455	117.5	27.5	6.8e-28
lcl|SIZZ01000001.1_prot_TBR39382.1_770	865	1096	BAC0091corS	491	270	487	95.1	29.9	3.6e-21
lcl|SIZZ01000001.1_prot_TBR39382.1_770	877	1097	BAC0198irlS	464	243	461	63.5	26	1.2e-11
lcl|SIZZ01000001.1_prot_TBR39382.1_770	877	1085	BAC0720copS	477	257	464	55.8	25.3	2.4e-09
lcl|SIZZ01000001.1_prot_TBR39382.1_770	877	1096	BAC0637copS	462	238	455	55.5	24.9	3.2e-09
lcl|SIZZ01000001.1_prot_TBR39382.1_770	857	1096	BAC0023aioS/aoxS	488	244	476	50.1	25.2	1.3e-07
lcl|SIZZ01000001.1_prot_TBR39382.1_770	877	1081	BAC0309pcoS	466	248	450	46.2	25.8	1.9e-06
lcl|SIZZ01000001.1_prot_TBR39437.1_837	36	204	BAC0465znuC/yebM	251	35	186	69.7	32.6	7.8e-14
lcl|SIZZ01000001.1_prot_TBR39437.1_837	8	192	BAC0604wtpC	344	16	180	68.2	28.1	2.3e-13
lcl|SIZZ01000001.1_prot_TBR39437.1_837	34	220	BAC0611modC	352	27	211	61.6	29.5	2.1e-11
lcl|SIZZ01000001.1_prot_TBR39437.1_837	8	199	BAC0162fbpC	356	27	206	58.5	26.1	1.8e-10
lcl|SIZZ01000001.1_prot_TBR39437.1_837	18	198	BAC0600modC	253	14	202	57.4	26.8	4e-10
lcl|SIZZ01000001.1_prot_TBR39437.1_837	3	228	BAC0432ybtP	600	339	568	52.8	22.4	9.8e-09
lcl|SIZZ01000001.1_prot_TBR39437.1_837	359	513	BAC0440yfeB	296	31	206	50.4	28.5	4.9e-08
lcl|SIZZ01000001.1_prot_TBR39437.1_837	358	533	BAC0164fecE	255	21	217	49.3	28.5	1.1e-07
lcl|SIZZ01000001.1_prot_TBR39437.1_837	36	203	BAC0274nikE	268	43	216	48.9	28	1.4e-07
lcl|SIZZ01000001.1_prot_TBR39437.1_837	359	519	BAC0607tupC	214	22	195	48.1	27.7	2.4e-07
lcl|SIZZ01000001.1_prot_TBR39437.1_837	370	533	BAC0400troB	266	41	227	47	29.3	5.4e-07
lcl|SIZZ01000001.1_prot_TBR39437.1_837	34	254	BAC0433ybtQ	600	374	580	44.3	24.3	3.5e-06
lcl|SIZZ01000001.1_prot_TBR39437.1_837	19	202	BAC0273nikD	254	16	204	43.1	26.2	7.8e-06
lcl|SIZZ01000001.1_prot_TBR39437.1_837	358	534	BAC0311pgpA/ltpgpA	1548	1306	1501	42	25.7	1.7e-05
lcl|SIZZ01000001.1_prot_TBR39450.1_854	860	1089	BAC0468zraS/hydG	465	232	458	69.3	28.9	2.3e-13
lcl|SIZZ01000001.1_prot_TBR39450.1_854	1116	1235	BAC0347silR	228	3	123	57.4	33.6	9.2e-10
lcl|SIZZ01000001.1_prot_TBR39450.1_854	851	1082	BAC0488pmrB	364	128	350	52.8	25.1	2.3e-08
lcl|SIZZ01000001.1_prot_TBR39450.1_854	1116	1235	BAC0111cusR/ylcA	227	3	123	52.4	32	3e-08
lcl|SIZZ01000001.1_prot_TBR39450.1_854	1116	1234	BAC0083copR	227	3	122	48.1	31.4	5.6e-07
lcl|SIZZ01000001.1_prot_TBR39450.1_854	860	1087	BAC0289nrsS	454	217	446	48.1	24.3	5.6e-07
lcl|SIZZ01000001.1_prot_TBR39450.1_854	1116	1231	BAC0638copR	231	3	119	46.6	31.4	1.6e-06
lcl|SIZZ01000001.1_prot_TBR39450.1_854	1116	1231	BAC0753copR	227	3	119	46.6	31.4	1.6e-06
lcl|SIZZ01000001.1_prot_TBR39450.1_854	1115	1195	BAC0089corR	466	6	88	45.4	32.1	3.6e-06
lcl|SIZZ01000001.1_prot_TBR39450.1_854	1116	1232	BAC0197irlR	229	3	119	44.3	29.4	8.1e-06
lcl|SIZZ01000001.1_prot_TBR39450.1_854	1160	1227	BAC0288nrsR	234	49	117	42.7	38.6	2.3e-05
lcl|SIZZ01000001.1_prot_TBR39453.1_857	10	122	BAC0125czcR	225	3	112	73.2	34.5	3.4e-15
lcl|SIZZ01000001.1_prot_TBR39453.1_857	10	133	BAC0638copR	231	3	124	69.7	32.6	3.7e-14
lcl|SIZZ01000001.1_prot_TBR39453.1_857	10	129	BAC0111cusR/ylcA	227	3	120	69.7	31.7	3.7e-14
lcl|SIZZ01000001.1_prot_TBR39453.1_857	10	134	BAC0719copR	230	3	125	67	28.8	2.4e-13
lcl|SIZZ01000001.1_prot_TBR39453.1_857	6	116	BAC0089corR	466	3	110	66.2	30.6	4.1e-13
lcl|SIZZ01000001.1_prot_TBR39453.1_857	10	122	BAC0288nrsR	234	3	115	65.9	31.3	5.4e-13
lcl|SIZZ01000001.1_prot_TBR39453.1_857	10	122	BAC0347silR	228	3	113	65.1	31	9.2e-13
lcl|SIZZ01000001.1_prot_TBR39453.1_857	10	122	BAC0083copR	227	3	113	64.7	31.9	1.2e-12
lcl|SIZZ01000001.1_prot_TBR39453.1_857	10	125	BAC0753copR	227	3	116	64.3	32.8	1.6e-12
lcl|SIZZ01000001.1_prot_TBR39453.1_857	10	122	BAC0197irlR	229	3	112	62.8	33.6	4.5e-12
lcl|SIZZ01000001.1_prot_TBR39453.1_857	10	133	BAC0467zraR/hydH	441	8	133	60.5	32.6	2.3e-11
lcl|SIZZ01000001.1_prot_TBR39453.1_857	10	157	BAC0308pcoR	226	4	149	58.5	26.4	8.6e-11
lcl|SIZZ01000001.1_prot_TBR39458.1_863	392	537	BAC0604wtpC	344	26	174	67.4	32	4.2e-13
lcl|SIZZ01000001.1_prot_TBR39458.1_863	394	564	BAC0611modC	352	26	202	65.9	33.7	1.2e-12
lcl|SIZZ01000001.1_prot_TBR39458.1_863	388	543	BAC0162fbpC	356	33	195	59.3	28.5	1.1e-10
lcl|SIZZ01000001.1_prot_TBR39458.1_863	382	575	BAC0607tupC	214	18	212	57.8	26.5	3.3e-10
lcl|SIZZ01000001.1_prot_TBR39458.1_863	369	573	BAC0400troB	266	11	225	57.4	27.2	4.4e-10
lcl|SIZZ01000001.1_prot_TBR39458.1_863	39	576	BAC0433ybtQ	600	16	564	57	23	5.7e-10
lcl|SIZZ01000001.1_prot_TBR39458.1_863	367	550	BAC0465znuC/yebM	251	3	179	55.1	28.9	2.2e-09
lcl|SIZZ01000001.1_prot_TBR39458.1_863	387	550	BAC0274nikE	268	33	210	54.7	30.2	2.8e-09
lcl|SIZZ01000001.1_prot_TBR39458.1_863	387	548	BAC0164fecE	255	23	195	48.5	25.1	2e-07
lcl|SIZZ01000001.1_prot_TBR39458.1_863	399	579	BAC0600modC	253	34	231	45.1	27.5	2.2e-06
lcl|SIZZ01000001.1_prot_TBR39458.1_863	134	574	BAC0432ybtP	600	99	561	43.5	21.9	6.5e-06
lcl|SIZZ01000001.1_prot_TBR39458.1_863	366	574	BAC0273nikD	254	2	224	43.1	24.1	8.5e-06
lcl|SIZZ01000001.1_prot_TBR39491.1_898	273	504	BAC0468zraS/hydG	465	233	455	90.9	27	3.1e-20
lcl|SIZZ01000001.1_prot_TBR39491.1_898	269	508	BAC0091corS	491	266	491	88.2	26.6	2e-19
lcl|SIZZ01000001.1_prot_TBR40691.1_904	8	437	BAC0467zraR/hydH	441	8	441	270	39.4	3.3e-74
lcl|SIZZ01000001.1_prot_TBR40691.1_904	6	438	BAC0089corR	466	5	455	265.4	36.6	8.1e-73
lcl|SIZZ01000001.1_prot_TBR40691.1_904	8	444	BAC0022aioR/aoxR	442	8	438	223	34.4	4.6e-60
lcl|SIZZ01000001.1_prot_TBR40691.1_904	8	112	BAC0347silR	228	3	108	49.7	34	7e-08
lcl|SIZZ01000001.1_prot_TBR40691.1_904	8	112	BAC0111cusR/ylcA	227	3	108	45.4	30.2	1.3e-06
lcl|SIZZ01000001.1_prot_TBR40691.1_904	8	128	BAC0487pmrA	222	3	121	42.4	32	1.1e-05
lcl|SIZZ01000001.1_prot_TBR39505.1_914	150	404	BAC0468zraS/hydG	465	209	455	117.1	29	3.2e-28
lcl|SIZZ01000001.1_prot_TBR39505.1_914	165	404	BAC0091corS	491	261	487	90.5	27.8	3.2e-20
lcl|SIZZ01000001.1_prot_TBR39505.1_914	188	404	BAC0289nrsS	454	226	445	75.9	26	8.2e-16
lcl|SIZZ01000001.1_prot_TBR39505.1_914	190	405	BAC0112cusS	480	266	480	67	27.8	3.8e-13
lcl|SIZZ01000001.1_prot_TBR39505.1_914	145	387	BAC0752copS	445	211	445	60.5	24.8	3.6e-11
lcl|SIZZ01000001.1_prot_TBR39505.1_914	295	406	BAC0637copS	462	344	457	56.2	31.9	6.7e-10
lcl|SIZZ01000001.1_prot_TBR39505.1_914	186	405	BAC0198irlS	464	243	461	53.1	23.5	5.7e-09
lcl|SIZZ01000001.1_prot_TBR39505.1_914	165	404	BAC0348silS	497	232	484	50.1	26.1	4.8e-08
lcl|SIZZ01000001.1_prot_TBR39505.1_914	295	387	BAC0309pcoS	466	354	448	44.7	29.3	2e-06
lcl|SIZZ01000001.1_prot_TBR39509.1_919	3	343	BAC0604wtpC	344	2	336	192.6	37.9	5.7e-51
lcl|SIZZ01000001.1_prot_TBR39509.1_919	3	245	BAC0162fbpC	356	12	254	152.9	36.7	5e-39
lcl|SIZZ01000001.1_prot_TBR39509.1_919	31	214	BAC0600modC	253	30	220	142.5	46.4	6.8e-36
lcl|SIZZ01000001.1_prot_TBR39509.1_919	1	217	BAC0607tupC	214	1	209	131	34.1	2e-32
lcl|SIZZ01000001.1_prot_TBR39509.1_919	3	237	BAC0316pstB	257	11	252	114.8	31.2	1.5e-27
lcl|SIZZ01000001.1_prot_TBR39509.1_919	18	217	BAC0274nikE	268	28	232	109.8	39.4	4.9e-26
lcl|SIZZ01000001.1_prot_TBR39509.1_919	30	225	BAC0611modC	352	26	217	107.5	34.8	2.4e-25
lcl|SIZZ01000001.1_prot_TBR39509.1_919	3	240	BAC0465znuC/yebM	251	5	221	103.6	32.8	3.5e-24
lcl|SIZZ01000001.1_prot_TBR39509.1_919	1	224	BAC0164fecE	255	1	225	101.7	35	1.3e-23
lcl|SIZZ01000001.1_prot_TBR39509.1_919	17	219	BAC0432ybtP	600	359	560	83.6	32.4	3.7e-18
lcl|SIZZ01000001.1_prot_TBR39509.1_919	17	219	BAC0433ybtQ	600	360	561	81.6	31.5	1.4e-17
lcl|SIZZ01000001.1_prot_TBR39509.1_919	3	217	BAC0400troB	266	11	223	80.9	31.7	2.4e-17
lcl|SIZZ01000001.1_prot_TBR39509.1_919	21	228	BAC0273nikD	254	22	232	72.8	29.5	6.6e-15
lcl|SIZZ01000001.1_prot_TBR39509.1_919	17	212	BAC0440yfeB	296	26	221	72	30.8	1.1e-14
lcl|SIZZ01000001.1_prot_TBR39509.1_919	18	219	BAC0311pgpA/ltpgpA	1548	650	837	60.1	30.7	4.4e-11
lcl|SIZZ01000001.1_prot_TBR39510.1_920	67	266	BAC0599modB	233	20	219	126.3	37	3.8e-31
lcl|SIZZ01000001.1_prot_TBR39510.1_920	56	266	BAC0610modB	229	2	214	102.4	30.6	5.9e-24
lcl|SIZZ01000001.1_prot_TBR39510.1_920	18	277	BAC0603wtpB	249	3	245	67.4	24.2	2.1e-13
lcl|SIZZ01000001.1_prot_TBR39510.1_920	28	277	BAC0317pstC	319	75	311	37.7	19.8	0.00018
lcl|SIZZ01000001.1_prot_TBR39511.1_921	57	268	BAC0599modB	233	18	233	116.3	35.9	3.7e-28
lcl|SIZZ01000001.1_prot_TBR39511.1_921	53	268	BAC0610modB	229	11	223	112.8	33.2	4.1e-27
lcl|SIZZ01000001.1_prot_TBR39511.1_921	1	216	BAC0603wtpB	249	1	199	66.6	27.8	3.4e-13
lcl|SIZZ01000001.1_prot_TBR39511.1_921	66	218	BAC0317pstC	319	84	251	45.4	25.9	8.1e-07
lcl|SIZZ01000001.1_prot_TBR39514.1_924	6	119	BAC0125czcR	225	3	116	57	33	1.4e-10
lcl|SIZZ01000001.1_prot_TBR39514.1_924	6	140	BAC0083copR	227	3	138	53.5	28.5	1.5e-09
lcl|SIZZ01000001.1_prot_TBR39514.1_924	6	119	BAC0753copR	227	3	117	51.6	31.3	5.7e-09
lcl|SIZZ01000001.1_prot_TBR39514.1_924	6	119	BAC0638copR	231	3	117	49.7	28.7	2.2e-08
lcl|SIZZ01000001.1_prot_TBR39514.1_924	6	119	BAC0197irlR	229	3	116	46.6	30.4	1.8e-07
lcl|SIZZ01000001.1_prot_TBR39514.1_924	3	97	BAC0089corR	466	4	97	44.7	27.4	7e-07
lcl|SIZZ01000001.1_prot_TBR39514.1_924	6	119	BAC0308pcoR	226	4	118	42.7	26.1	2.7e-06
lcl|SIZZ01000001.1_prot_TBR39514.1_924	6	119	BAC0719copR	230	3	117	42.4	28.7	3.5e-06
lcl|SIZZ01000001.1_prot_TBR39514.1_924	6	103	BAC0467zraR/hydH	441	8	106	39.7	26.3	2.3e-05
lcl|SIZZ01000001.1_prot_TBR39515.1_925	18	142	BAC0288nrsR	234	2	128	50.4	24.4	2e-08
lcl|SIZZ01000001.1_prot_TBR39515.1_925	43	133	BAC0467zraR/hydH	441	32	122	47.8	25.3	1.3e-07
lcl|SIZZ01000001.1_prot_TBR39529.1_941	21	244	BAC0719copR	230	5	219	85.1	30.7	8.5e-19
lcl|SIZZ01000001.1_prot_TBR39529.1_941	21	249	BAC0487pmrA	222	5	219	82.4	30.2	5.5e-18
lcl|SIZZ01000001.1_prot_TBR39529.1_941	36	244	BAC0083copR	227	19	219	80.5	30	2.1e-17
lcl|SIZZ01000001.1_prot_TBR39529.1_941	19	253	BAC0197irlR	229	3	226	77	27.7	2.3e-16
lcl|SIZZ01000001.1_prot_TBR39529.1_941	19	244	BAC0753copR	227	3	219	76.6	29.5	3e-16
lcl|SIZZ01000001.1_prot_TBR39529.1_941	21	244	BAC0111cusR/ylcA	227	4	219	73.2	27.1	3.4e-15
lcl|SIZZ01000001.1_prot_TBR39529.1_941	19	244	BAC0125czcR	225	3	217	70.5	27.9	2.2e-14
lcl|SIZZ01000001.1_prot_TBR39529.1_941	19	226	BAC0347silR	228	3	204	65.5	26.1	7e-13
lcl|SIZZ01000001.1_prot_TBR39529.1_941	48	248	BAC0288nrsR	234	33	232	55.8	27.1	5.6e-10
lcl|SIZZ01000001.1_prot_TBR39529.1_941	19	118	BAC0022aioR/aoxR	442	8	108	44.3	27.5	1.7e-06
lcl|SIZZ01000001.1_prot_TBR39532.1_944	10	73	BAC0164fecE	255	13	77	37.7	27.7	0.00071
lcl|SIZZ01000001.1_prot_TBR40696.1_952	27	311	BAC0460zneB/hmxB	385	81	309	38.9	24.6	8.8e-05
lcl|SIZZ01000001.1_prot_TBR40696.1_952	38	273	BAC0204cnrB	395	103	282	37.7	22.9	0.00019
lcl|SIZZ01000001.1_prot_TBR39546.1_959	311	501	BAC0465znuC/yebM	251	3	189	92.8	33.5	1e-20
lcl|SIZZ01000001.1_prot_TBR39546.1_959	332	515	BAC0162fbpC	356	25	228	68.2	28.8	2.7e-13
lcl|SIZZ01000001.1_prot_TBR39546.1_959	16	223	BAC0274nikE	268	27	229	59.3	27.1	1.2e-10
lcl|SIZZ01000001.1_prot_TBR39546.1_959	342	516	BAC0607tupC	214	26	212	58.9	25	1.6e-10
lcl|SIZZ01000001.1_prot_TBR39546.1_959	313	506	BAC0400troB	266	11	213	58.5	25.9	2.1e-10
lcl|SIZZ01000001.1_prot_TBR39546.1_959	313	513	BAC0164fecE	255	3	218	56.6	27	8.1e-10
lcl|SIZZ01000001.1_prot_TBR39546.1_959	299	501	BAC0440yfeB	296	3	211	55.5	27.4	1.8e-09
lcl|SIZZ01000001.1_prot_TBR39546.1_959	310	511	BAC0432ybtP	600	339	556	53.5	25.9	6.8e-09
lcl|SIZZ01000001.1_prot_TBR39546.1_959	13	241	BAC0311pgpA/ltpgpA	1548	646	849	51.6	25.5	2.6e-08
lcl|SIZZ01000001.1_prot_TBR39546.1_959	334	479	BAC0604wtpC	344	16	173	49.3	27.8	1.3e-07
lcl|SIZZ01000001.1_prot_TBR39546.1_959	2	223	BAC0433ybtQ	600	349	556	48.1	23.2	2.9e-07
lcl|SIZZ01000001.1_prot_TBR39546.1_959	423	531	BAC0316pstB	257	140	250	42.4	26.1	1.6e-05
lcl|SIZZ01000001.1_prot_TBR39546.1_959	144	227	BAC0611modC	352	123	210	42	29.5	2.1e-05
lcl|SIZZ01000001.1_prot_TBR39546.1_959	2	205	BAC0273nikD	254	5	200	40.4	26.8	6e-05
lcl|SIZZ01000001.1_prot_TBR39546.1_959	438	477	BAC0600modC	253	144	183	37.4	47.5	0.00051
lcl|SIZZ01000001.1_prot_TBR39558.1_972	33	139	BAC0125czcR	225	30	132	45.4	28	6.4e-07
lcl|SIZZ01000001.1_prot_TBR39558.1_972	50	116	BAC0288nrsR	234	49	115	42.4	32.8	5.4e-06
lcl|SIZZ01000001.1_prot_TBR40699.1_990	477	709	BAC0003acn	943	173	392	54.7	24.9	4.2e-09
lcl|SIZZ01000001.1_prot_TBR39575.1_991	2	910	BAC0003acn	943	6	939	1100.1	58.8	0
lcl|SIZZ01000001.1_prot_TBR39583.1_999	1	116	BAC0585arsC	141	1	116	102.8	47.4	1.8e-24
lcl|SIZZ01000001.1_prot_TBR39583.1_999	1	116	BAC0584arsC	141	1	116	99.4	44	2e-23
lcl|SIZZ01000001.1_prot_TBR39583.1_999	1	116	BAC0583arsC	141	1	116	99	44.8	2.6e-23
lcl|SIZZ01000001.1_prot_TBR39583.1_999	1	116	BAC0582arsC	141	1	116	95.5	42.2	2.9e-22
lcl|SIZZ01000001.1_prot_TBR39607.1_1027	75	215	BAC0314pmrA	399	62	181	42	31	1.4e-05
lcl|SIZZ01000001.1_prot_TBR39625.1_1048	20	302	BAC0355ruvB	352	20	301	50.4	25.4	4e-08
lcl|SIZZ01000001.1_prot_TBR39644.1_1067	95	789	BAC0620copA	727	11	723	309.7	31.2	6.7e-86
lcl|SIZZ01000001.1_prot_TBR39644.1_1067	94	785	BAC0102cueA	797	75	783	309.3	32.6	8.7e-86
lcl|SIZZ01000001.1_prot_TBR39644.1_1067	150	787	BAC0568actP	841	158	836	291.6	31.6	1.9e-80
lcl|SIZZ01000001.1_prot_TBR39644.1_1067	6	789	BAC0725copA	834	14	829	291.6	29.7	1.9e-80
lcl|SIZZ01000001.1_prot_TBR39644.1_1067	96	787	BAC0078copA	802	79	798	289.7	30.5	7.2e-80
lcl|SIZZ01000001.1_prot_TBR39644.1_1067	213	789	BAC0101ctpV	770	166	762	286.2	34.2	7.9e-79
lcl|SIZZ01000001.1_prot_TBR39644.1_1067	96	787	BAC0012actP	827	88	821	285.4	30.4	1.4e-78
lcl|SIZZ01000001.1_prot_TBR39644.1_1067	96	785	BAC0622copA	804	22	723	285	32.4	1.8e-78
lcl|SIZZ01000001.1_prot_TBR39644.1_1067	92	789	BAC0183golT	762	11	748	276.2	31.3	8.2e-76
lcl|SIZZ01000001.1_prot_TBR39644.1_1067	96	787	BAC0624copA	732	8	715	268.9	30.6	1.3e-73
lcl|SIZZ01000001.1_prot_TBR39644.1_1067	213	787	BAC0346silP	824	201	817	267.7	30.6	2.9e-73
lcl|SIZZ01000001.1_prot_TBR39644.1_1067	214	792	BAC0383tcrB	710	111	710	248.1	30.5	2.4e-67
lcl|SIZZ01000001.1_prot_TBR39644.1_1067	96	789	BAC0461zntA/yhhO	732	54	730	232.3	30.6	1.4e-62
lcl|SIZZ01000001.1_prot_TBR39644.1_1067	96	795	BAC0623copA	741	7	740	229.6	26.4	8.8e-62
lcl|SIZZ01000001.1_prot_TBR39644.1_1067	213	787	BAC0079copB	745	139	744	227.6	29.1	3.3e-61
lcl|SIZZ01000001.1_prot_TBR39648.1_1071	21	583	BAC0432ybtP	600	16	575	224.6	32.4	2.1e-60
lcl|SIZZ01000001.1_prot_TBR39648.1_1071	105	590	BAC0433ybtQ	600	103	583	208.4	35.4	1.5e-55
lcl|SIZZ01000001.1_prot_TBR39648.1_1071	118	574	BAC0311pgpA/ltpgpA	1548	1022	1509	96.7	24.6	6.5e-22
lcl|SIZZ01000001.1_prot_TBR39648.1_1071	368	577	BAC0164fecE	255	18	229	95.9	31.6	1.1e-21
lcl|SIZZ01000001.1_prot_TBR39648.1_1071	368	565	BAC0274nikE	268	28	231	93.2	36.1	7.2e-21
lcl|SIZZ01000001.1_prot_TBR39648.1_1071	368	568	BAC0604wtpC	344	16	213	90.9	32.2	3.6e-20
lcl|SIZZ01000001.1_prot_TBR39648.1_1071	367	576	BAC0316pstB	257	25	242	88.6	32.6	1.8e-19
lcl|SIZZ01000001.1_prot_TBR39648.1_1071	366	576	BAC0400troB	266	24	232	83.6	32.3	5.7e-18
lcl|SIZZ01000001.1_prot_TBR39648.1_1071	368	573	BAC0162fbpC	356	27	233	81.6	33.8	2.2e-17
lcl|SIZZ01000001.1_prot_TBR39648.1_1071	346	579	BAC0440yfeB	296	7	238	78.2	29.9	2.4e-16
lcl|SIZZ01000001.1_prot_TBR39648.1_1071	368	569	BAC0465znuC/yebM	251	20	203	72.4	30.1	1.3e-14
lcl|SIZZ01000001.1_prot_TBR39648.1_1071	382	568	BAC0611modC	352	28	211	68.9	29.7	1.5e-13
lcl|SIZZ01000001.1_prot_TBR39648.1_1071	366	573	BAC0273nikD	254	17	228	68.6	29.7	1.9e-13
lcl|SIZZ01000001.1_prot_TBR39648.1_1071	372	564	BAC0607tupC	214	22	207	65.5	28.6	1.6e-12
lcl|SIZZ01000001.1_prot_TBR39648.1_1071	381	563	BAC0600modC	253	30	220	50.8	28.7	4.1e-08
lcl|SIZZ01000001.1_prot_TBR39649.1_1072	7	243	BAC0114cutC	248	4	244	152.9	39.1	3.2e-39
lcl|SIZZ01000001.1_prot_TBR39653.1_1076	6	177	BAC0538chrR	186	10	178	84.7	30.2	8e-19
lcl|SIZZ01000001.1_prot_TBR39653.1_1076	3	166	BAC0595arsH	206	10	168	42.7	25.5	3.5e-06
lcl|SIZZ01000001.1_prot_TBR39660.1_1083	19	130	BAC0638copR	231	1	108	55.8	31	5.5e-10
lcl|SIZZ01000001.1_prot_TBR39660.1_1083	19	130	BAC0083copR	227	1	108	55.1	30.1	9.3e-10
lcl|SIZZ01000001.1_prot_TBR39660.1_1083	19	130	BAC0125czcR	225	1	107	50.4	26.8	2.3e-08
lcl|SIZZ01000001.1_prot_TBR39660.1_1083	17	151	BAC0467zraR/hydH	441	4	138	48.5	27.9	8.7e-08
lcl|SIZZ01000001.1_prot_TBR39660.1_1083	21	135	BAC0089corR	466	7	116	42	28.2	8.2e-06
lcl|SIZZ01000001.1_prot_TBR39668.1_1092	1	186	BAC0073cnrH	191	1	185	59.3	24.6	3.9e-11
lcl|SIZZ01000001.1_prot_TBR40709.1_1122	7	736	BAC0169fpvA	815	79	815	440.7	36.4	2.3e-125
lcl|SIZZ01000001.1_prot_TBR40709.1_1122	53	736	BAC0168fptA	720	28	720	305.4	31.5	1.2e-84
lcl|SIZZ01000001.1_prot_TBR39712.1_1140	5	179	BAC0538chrR	186	7	181	156.8	44.9	1.6e-40
lcl|SIZZ01000001.1_prot_TBR39723.1_1151	19	368	BAC0645mdtA	413	46	385	153.3	29.4	4e-39
lcl|SIZZ01000001.1_prot_TBR39723.1_1151	56	353	BAC0120czcB	520	215	496	60.1	25.2	4.6e-11
lcl|SIZZ01000001.1_prot_TBR39723.1_1151	37	341	BAC0460zneB/hmxB	385	65	360	39.3	22.8	8.4e-05
lcl|SIZZ01000001.1_prot_TBR39724.1_1152	1	1028	BAC0563acrD	1037	1	1028	900.2	47.4	1.5e-263
lcl|SIZZ01000001.1_prot_TBR39724.1_1152	5	1028	BAC0646mdtB	1040	16	1024	365.2	28.5	1.8e-102
lcl|SIZZ01000001.1_prot_TBR39724.1_1152	3	1028	BAC0647mdtC	1026	5	1010	357.8	28.2	2.9e-100
lcl|SIZZ01000001.1_prot_TBR39724.1_1152	13	1023	BAC0130czrA	1051	14	1033	278.1	25.9	2.9e-76
lcl|SIZZ01000001.1_prot_TBR39724.1_1152	23	1062	BAC0119czcA	1063	27	1062	255.8	25.6	1.5e-69
lcl|SIZZ01000001.1_prot_TBR39724.1_1152	11	1023	BAC0286nrsA	1054	19	1020	235.7	25.5	1.6e-63
lcl|SIZZ01000001.1_prot_TBR39724.1_1152	13	1023	BAC0267nczA	1043	14	1032	229.9	24.6	9e-62
lcl|SIZZ01000001.1_prot_TBR39724.1_1152	11	1028	BAC0549nccA	1076	12	1062	204.9	24.1	3.1e-54
lcl|SIZZ01000001.1_prot_TBR39724.1_1152	11	1031	BAC0203cnrA	1076	12	1066	198.4	24	2.9e-52
lcl|SIZZ01000001.1_prot_TBR39724.1_1152	16	1026	BAC0341silA	1048	20	1038	187.6	23.1	5.1e-49
lcl|SIZZ01000001.1_prot_TBR39724.1_1152	16	1023	BAC0107cusA/ybdE	1047	20	1035	183	23.1	1.3e-47
lcl|SIZZ01000001.1_prot_TBR39724.1_1152	4	1033	BAC0127cznA	1019	8	1018	176.4	22	1.2e-45
lcl|SIZZ01000001.1_prot_TBR39727.1_1155	9	75	BAC0201kmtR	130	21	87	52.4	49.3	7.4e-09
lcl|SIZZ01000001.1_prot_TBR39727.1_1155	13	94	BAC0456ziaR	132	53	131	50.4	37.8	2.8e-08
lcl|SIZZ01000001.1_prot_TBR39727.1_1155	9	71	BAC0588arsR	117	7	70	46.6	42.2	4.1e-07
lcl|SIZZ01000001.1_prot_TBR39727.1_1155	9	119	BAC0594arsR	117	9	112	46.2	32.1	5.3e-07
lcl|SIZZ01000001.1_prot_TBR39727.1_1155	9	71	BAC0591arsR	117	9	72	43.9	40.6	2.6e-06
lcl|SIZZ01000001.1_prot_TBR39727.1_1155	12	93	BAC0366smtB/ziaR	122	42	120	43.9	35.4	2.6e-06
lcl|SIZZ01000001.1_prot_TBR39727.1_1155	1	75	BAC0592arsR	104	1	75	42.7	34.7	5.9e-06
lcl|SIZZ01000001.1_prot_TBR39727.1_1155	5	71	BAC0589arsR	117	5	72	42.4	38.2	7.6e-06
lcl|SIZZ01000001.1_prot_TBR39727.1_1155	1	73	BAC0590arsR	104	1	73	40	32.9	3.8e-05
lcl|SIZZ01000001.1_prot_TBR39740.1_1171	1	221	BAC0487pmrA	222	1	221	171.4	40.3	7.8e-45
lcl|SIZZ01000001.1_prot_TBR39740.1_1171	1	216	BAC0197irlR	229	1	219	149.1	35.9	4.2e-38
lcl|SIZZ01000001.1_prot_TBR39740.1_1171	1	221	BAC0083copR	227	1	226	146	35.4	3.5e-37
lcl|SIZZ01000001.1_prot_TBR39740.1_1171	1	216	BAC0638copR	231	1	221	145.2	36.2	6e-37
lcl|SIZZ01000001.1_prot_TBR39740.1_1171	3	216	BAC0308pcoR	226	4	221	141	34.9	1.1e-35
lcl|SIZZ01000001.1_prot_TBR39740.1_1171	1	216	BAC0753copR	227	1	221	134.4	35.3	1.1e-33
lcl|SIZZ01000001.1_prot_TBR39740.1_1171	1	216	BAC0125czcR	225	1	219	132.5	35.5	4e-33
lcl|SIZZ01000001.1_prot_TBR39740.1_1171	1	220	BAC0288nrsR	234	1	234	132.5	34.6	4e-33
lcl|SIZZ01000001.1_prot_TBR39740.1_1171	1	216	BAC0111cusR/ylcA	227	1	221	131.3	34.4	9e-33
lcl|SIZZ01000001.1_prot_TBR39740.1_1171	1	216	BAC0719copR	230	1	221	130.2	34.8	2e-32
lcl|SIZZ01000001.1_prot_TBR39740.1_1171	1	216	BAC0347silR	228	1	223	129.4	35.4	3.4e-32
lcl|SIZZ01000001.1_prot_TBR39740.1_1171	3	214	BAC0095crdR	213	5	208	90.5	28.2	1.8e-20
lcl|SIZZ01000001.1_prot_TBR39740.1_1171	3	112	BAC0467zraR/hydH	441	8	117	80.5	36.4	1.8e-17
lcl|SIZZ01000001.1_prot_TBR39740.1_1171	3	120	BAC0089corR	466	7	123	69.3	34.7	4.2e-14
lcl|SIZZ01000001.1_prot_TBR39740.1_1171	3	117	BAC0022aioR/aoxR	442	8	123	60.1	29.9	2.5e-11
lcl|SIZZ01000001.1_prot_TBR39741.1_1172	172	459	BAC0488pmrB	364	71	352	134	35.3	3e-33
lcl|SIZZ01000001.1_prot_TBR39741.1_1172	181	444	BAC0637copS	462	172	439	102.8	29.5	7.3e-24
lcl|SIZZ01000001.1_prot_TBR39741.1_1172	161	452	BAC0112cusS	480	181	471	101.3	27.1	2.1e-23
lcl|SIZZ01000001.1_prot_TBR39741.1_1172	243	463	BAC0289nrsS	454	222	446	100.1	30	4.7e-23
lcl|SIZZ01000001.1_prot_TBR39741.1_1172	158	444	BAC0752copS	445	154	445	99.8	28.5	6.2e-23
lcl|SIZZ01000001.1_prot_TBR39741.1_1172	5	450	BAC0198irlS	464	9	449	97.1	24.6	4e-22
lcl|SIZZ01000001.1_prot_TBR39741.1_1172	177	463	BAC0309pcoS	466	178	465	95.9	27.3	8.9e-22
lcl|SIZZ01000001.1_prot_TBR39741.1_1172	5	463	BAC0126czcS	476	11	454	94.4	26.3	2.6e-21
lcl|SIZZ01000001.1_prot_TBR39741.1_1172	132	449	BAC0720copS	477	140	463	93.2	27.5	5.8e-21
lcl|SIZZ01000001.1_prot_TBR39741.1_1172	181	469	BAC0348silS	497	198	491	92	25.2	1.3e-20
lcl|SIZZ01000001.1_prot_TBR39741.1_1172	175	429	BAC0537copS	487	164	418	89	27.9	1.1e-19
lcl|SIZZ01000001.1_prot_TBR39744.1_1175	16	980	BAC0119czcA	1063	16	1008	280.4	26.4	5.5e-77
lcl|SIZZ01000001.1_prot_TBR39744.1_1175	14	1006	BAC0286nrsA	1054	20	1021	266.9	26.2	6.3e-73
lcl|SIZZ01000001.1_prot_TBR39744.1_1175	16	1008	BAC0130czrA	1051	16	1036	262.7	25.4	1.2e-71
lcl|SIZZ01000001.1_prot_TBR39744.1_1175	7	980	BAC0267nczA	1043	6	1007	250	26.9	8e-68
lcl|SIZZ01000001.1_prot_TBR39744.1_1175	32	980	BAC0549nccA	1076	34	1031	238	24.8	3.1e-64
lcl|SIZZ01000001.1_prot_TBR39744.1_1175	13	980	BAC0646mdtB	1040	22	994	233.8	25.1	5.9e-63
lcl|SIZZ01000001.1_prot_TBR39744.1_1175	2	1009	BAC0203cnrA	1076	4	1060	233.4	24.3	7.7e-63
lcl|SIZZ01000001.1_prot_TBR39744.1_1175	16	980	BAC0647mdtC	1026	16	980	229.9	24.1	8.5e-62
lcl|SIZZ01000001.1_prot_TBR39744.1_1175	18	980	BAC0127cznA	1019	20	983	223.8	22.8	6.1e-60
lcl|SIZZ01000001.1_prot_TBR39744.1_1175	6	978	BAC0107cusA/ybdE	1047	4	1008	212.6	25.8	1.4e-56
lcl|SIZZ01000001.1_prot_TBR39744.1_1175	6	978	BAC0341silA	1048	4	1008	203.4	23.9	8.6e-54
lcl|SIZZ01000001.1_prot_TBR39744.1_1175	16	979	BAC0563acrD	1037	14	997	174.9	24.1	3.3e-45
lcl|SIZZ01000001.1_prot_TBR39744.1_1175	63	323	BAC0542cnrA	304	4	295	85.1	24.3	3.4e-18
lcl|SIZZ01000001.1_prot_TBR39744.1_1175	63	323	BAC0543cnrA	304	4	295	85.1	24.3	3.4e-18
lcl|SIZZ01000001.1_prot_TBR39744.1_1175	63	323	BAC0544cnrA	304	4	295	81.3	24	4.9e-17
lcl|SIZZ01000001.1_prot_TBR40715.1_1190	298	599	BAC0432ybtP	600	286	577	199.5	39.8	7.5e-53
lcl|SIZZ01000001.1_prot_TBR40715.1_1190	15	614	BAC0433ybtQ	600	6	593	186.4	29.1	6.5e-49
lcl|SIZZ01000001.1_prot_TBR40715.1_1190	356	588	BAC0311pgpA/ltpgpA	1548	1281	1509	119.8	34	7.5e-29
lcl|SIZZ01000001.1_prot_TBR40715.1_1190	354	606	BAC0316pstB	257	4	252	99.8	28.2	8e-23
lcl|SIZZ01000001.1_prot_TBR40715.1_1190	376	591	BAC0164fecE	255	17	229	89	30.5	1.4e-19
lcl|SIZZ01000001.1_prot_TBR40715.1_1190	367	580	BAC0274nikE	268	12	232	82	30.1	1.7e-17
lcl|SIZZ01000001.1_prot_TBR40715.1_1190	384	590	BAC0604wtpC	344	23	221	79.3	28.4	1.1e-16
lcl|SIZZ01000001.1_prot_TBR40715.1_1190	361	580	BAC0400troB	266	11	223	78.2	28.8	2.5e-16
lcl|SIZZ01000001.1_prot_TBR40715.1_1190	382	580	BAC0607tupC	214	23	209	72	28.1	1.8e-14
lcl|SIZZ01000001.1_prot_TBR40715.1_1190	392	587	BAC0611modC	352	29	216	69.3	29.1	1.2e-13
lcl|SIZZ01000001.1_prot_TBR40715.1_1190	361	574	BAC0465znuC/yebM	251	5	195	69.3	28.1	1.2e-13
lcl|SIZZ01000001.1_prot_TBR40715.1_1190	376	581	BAC0162fbpC	356	26	227	67.8	28.3	3.4e-13
lcl|SIZZ01000001.1_prot_TBR40715.1_1190	376	582	BAC0273nikD	254	18	223	66.6	27.8	7.5e-13
lcl|SIZZ01000001.1_prot_TBR40715.1_1190	387	582	BAC0440yfeB	296	37	227	53.5	24.9	6.6e-09
lcl|SIZZ01000001.1_prot_TBR40715.1_1190	389	559	BAC0600modC	253	29	201	52	28	1.9e-08
lcl|SIZZ01000001.1_prot_TBR39804.1_1243	44	144	BAC0035arsM	283	75	177	50.8	32.4	1.7e-08
lcl|SIZZ01000001.1_prot_TBR39815.1_1255	3	515	sp|P0A5B9|DNAK_MYCTU	625	5	516	317.4	36.5	2.3e-88
lcl|SIZZ01000001.1_prot_TBR39854.1_1294	9	255	BAC0452yqjH	254	11	251	158.3	37.2	8.3e-41
lcl|SIZZ01000001.1_prot_TBR39858.1_1298	73	318	BAC0626copB	328	79	328	234.6	46.6	1.1e-63
lcl|SIZZ01000001.1_prot_TBR39858.1_1298	121	318	BAC0718copB	326	126	326	232.3	53.2	5.4e-63
lcl|SIZZ01000001.1_prot_TBR39858.1_1298	88	318	BAC0730copB	295	54	295	232.3	47.3	5.4e-63
lcl|SIZZ01000001.1_prot_TBR39858.1_1298	86	318	BAC0628copB	422	191	422	229.9	50	2.7e-62
lcl|SIZZ01000001.1_prot_TBR39858.1_1298	86	318	BAC0627copB	422	191	422	227.6	49.6	1.3e-61
lcl|SIZZ01000001.1_prot_TBR39858.1_1298	109	318	BAC0304pcoB	296	85	296	215.3	48.4	6.8e-58
lcl|SIZZ01000001.1_prot_TBR39858.1_1298	109	318	BAC0734pcoB	339	128	339	198	46.9	1.1e-52
lcl|SIZZ01000001.1_prot_TBR39858.1_1298	118	318	BAC0722copB	284	83	284	150.2	37.6	2.7e-38
lcl|SIZZ01000001.1_prot_TBR39859.1_1299	13	565	BAC0077copA	609	7	607	672.2	55.8	3.6e-195
lcl|SIZZ01000001.1_prot_TBR39859.1_1299	13	565	BAC0303pcoA	605	7	603	671.8	56.3	4.7e-195
lcl|SIZZ01000001.1_prot_TBR39859.1_1299	4	566	BAC0716copA	619	10	619	669.8	55.8	1.8e-194
lcl|SIZZ01000001.1_prot_TBR39859.1_1299	11	565	BAC0619copA	564	5	562	664.8	59.3	5.8e-193
lcl|SIZZ01000001.1_prot_TBR39859.1_1299	1	565	BAC0621copA	623	1	621	641.3	55.1	6.8e-186
lcl|SIZZ01000001.1_prot_TBR39859.1_1299	1	565	BAC0625copA	622	1	620	641.3	55.1	6.8e-186
lcl|SIZZ01000001.1_prot_TBR39859.1_1299	16	566	BAC0723copA	641	18	641	604	51.4	1.2e-174
lcl|SIZZ01000001.1_prot_TBR39859.1_1299	70	559	BAC0480mmco	504	83	496	207.2	31.2	3.3e-55
lcl|SIZZ01000001.1_prot_TBR39859.1_1299	38	566	BAC0117cutO	491	18	490	136	26.1	9.3e-34
lcl|SIZZ01000001.1_prot_TBR39859.1_1299	11	559	BAC0103cueO	516	1	510	100.9	24.9	3.3e-23
lcl|SIZZ01000001.1_prot_TBR39866.1_1306	34	860	BAC0003acn	943	36	942	726.9	43.3	1.9e-211
lcl|SIZZ01000001.1_prot_TBR39876.1_1318	212	521	BAC0651merA	547	86	421	58.2	23.6	2.3e-10
lcl|SIZZ01000001.1_prot_TBR39876.1_1318	308	513	BAC0224merA	631	291	498	51.2	26.5	2.8e-08
lcl|SIZZ01000001.1_prot_TBR40724.1_1326	8	69	BAC0281nmtR	120	22	83	43.9	38.7	1.1e-06
lcl|SIZZ01000001.1_prot_TBR40724.1_1326	12	76	BAC0201kmtR	130	21	85	39.7	38.5	2.1e-05
lcl|SIZZ01000001.1_prot_TBR40724.1_1326	5	102	BAC0456ziaR	132	42	129	36.6	28.3	0.00018
lcl|SIZZ01000001.1_prot_TBR40724.1_1326	7	76	BAC0592arsR	104	4	73	34.3	27.1	0.00088
lcl|SIZZ01000001.1_prot_TBR39885.1_1328	4	164	BAC0638copR	231	3	162	45.8	28.2	4.9e-07
lcl|SIZZ01000001.1_prot_TBR39885.1_1328	4	123	BAC0753copR	227	3	119	42.4	30.6	5.4e-06
lcl|SIZZ01000001.1_prot_TBR39885.1_1328	4	105	BAC0089corR	466	7	104	37	22.5	0.00023
lcl|SIZZ01000001.1_prot_TBR39886.1_1329	753	970	BAC0126czcS	476	237	461	78.6	32	3.4e-16
lcl|SIZZ01000001.1_prot_TBR39886.1_1329	752	962	BAC0112cusS	480	262	479	75.9	30	2.2e-15
lcl|SIZZ01000001.1_prot_TBR39886.1_1329	753	969	BAC0637copS	462	239	462	73.6	28.9	1.1e-14
lcl|SIZZ01000001.1_prot_TBR39886.1_1329	753	930	BAC0537copS	487	237	418	70.5	27.7	9.4e-14
lcl|SIZZ01000001.1_prot_TBR39886.1_1329	752	963	BAC0289nrsS	454	224	446	70.1	28.9	1.2e-13
lcl|SIZZ01000001.1_prot_TBR39886.1_1329	753	962	BAC0198irlS	464	244	460	69.7	27.5	1.6e-13
lcl|SIZZ01000001.1_prot_TBR39886.1_1329	734	963	BAC0468zraS/hydG	465	227	456	61.6	24.3	4.4e-11
lcl|SIZZ01000001.1_prot_TBR39886.1_1329	753	959	BAC0309pcoS	466	249	461	60.1	27.4	1.3e-10
lcl|SIZZ01000001.1_prot_TBR39886.1_1329	754	965	BAC0488pmrB	364	146	358	58.5	27.6	3.7e-10
lcl|SIZZ01000001.1_prot_TBR39886.1_1329	753	964	BAC0720copS	477	258	476	55.1	24.5	4.1e-09
lcl|SIZZ01000001.1_prot_TBR39886.1_1329	858	935	BAC0348silS	497	377	458	50.8	35.4	7.7e-08
lcl|SIZZ01000001.1_prot_TBR39886.1_1329	986	1094	BAC0467zraR/hydH	441	9	119	38.1	30.4	0.00052
lcl|SIZZ01000001.1_prot_TBR39888.1_1331	149	762	BAC0168fptA	720	154	720	66.2	22.4	1.2e-12
lcl|SIZZ01000001.1_prot_TBR39888.1_1331	528	762	BAC0169fpvA	815	602	815	60.5	24.6	6.7e-11
lcl|SIZZ01000001.1_prot_TBR39888.1_1331	63	266	BAC0169fpvA	815	164	356	51.6	23.9	3.1e-08
lcl|SIZZ01000001.1_prot_TBR39898.1_1341	4	62	BAC0076comR/ycfQ	210	20	78	42	35.6	5.8e-06
lcl|SIZZ01000001.1_prot_TBR39949.1_1396	5	446	BAC0651merA	547	86	530	205.7	28.6	7.6e-55
lcl|SIZZ01000001.1_prot_TBR39949.1_1396	5	446	BAC0224merA	631	170	614	200.3	28.6	3.2e-53
lcl|SIZZ01000001.1_prot_TBR39949.1_1396	9	430	BAC0650merA	569	111	536	173.7	29.7	3.2e-45
lcl|SIZZ01000001.1_prot_TBR39949.1_1396	3	430	BAC0653merA	562	98	529	165.6	30.2	8.7e-43
lcl|SIZZ01000001.1_prot_TBR39949.1_1396	9	430	BAC0652merA	561	103	528	163.7	29.7	3.3e-42
lcl|SIZZ01000001.1_prot_TBR39949.1_1396	5	430	BAC0649merA	568	102	535	157.9	27.1	1.8e-40
lcl|SIZZ01000001.1_prot_TBR39949.1_1396	9	230	BAC0648merA	460	103	333	84	27.8	3.3e-18
lcl|SIZZ01000001.1_prot_TBR39957.1_1404	44	391	BAC0314pmrA	399	36	388	52	22.5	1.3e-08
lcl|SIZZ01000001.1_prot_TBR39964.1_1411	54	322	BAC0356recG	691	293	561	40.8	25.3	4.5e-05
lcl|SIZZ01000001.1_prot_TBR39970.1_1417	276	517	BAC0088corC	292	39	283	121.3	31.7	2.2e-29
lcl|SIZZ01000001.1_prot_TBR39970.1_1417	305	513	BAC0643corB	227	3	215	87.4	28.7	3.5e-19
lcl|SIZZ01000001.1_prot_TBR40729.1_1427	2	174	BAC0073cnrH	191	12	189	57.4	29.2	1.3e-10
lcl|SIZZ01000001.1_prot_TBR40729.1_1427	4	162	BAC0555nccH	186	14	173	43.9	27.5	1.5e-06
lcl|SIZZ01000001.1_prot_TBR39999.1_1450	74	765	BAC0169fpvA	815	164	815	109	22.8	1.7e-25
lcl|SIZZ01000001.1_prot_TBR39999.1_1450	19	740	BAC0168fptA	720	22	694	95.9	22.5	1.4e-21
lcl|SIZZ01000001.1_prot_TBR40033.1_1486	1	224	BAC0083copR	227	1	227	172.2	44.7	4.7e-45
lcl|SIZZ01000001.1_prot_TBR40033.1_1486	1	222	BAC0487pmrA	222	1	220	162.5	38.7	3.7e-42
lcl|SIZZ01000001.1_prot_TBR40033.1_1486	1	224	BAC0638copR	231	1	227	153.7	39.2	1.7e-39
lcl|SIZZ01000001.1_prot_TBR40033.1_1486	1	223	BAC0719copR	230	1	226	153.7	38.9	1.7e-39
lcl|SIZZ01000001.1_prot_TBR40033.1_1486	1	219	BAC0125czcR	225	1	220	153.3	39.4	2.3e-39
lcl|SIZZ01000001.1_prot_TBR40033.1_1486	1	219	BAC0753copR	227	1	222	147.5	39.2	1.2e-37
lcl|SIZZ01000001.1_prot_TBR40033.1_1486	1	219	BAC0197irlR	229	1	220	144.4	39.8	1e-36
lcl|SIZZ01000001.1_prot_TBR40033.1_1486	1	219	BAC0347silR	228	1	224	143.7	39.1	1.8e-36
lcl|SIZZ01000001.1_prot_TBR40033.1_1486	2	219	BAC0308pcoR	226	3	222	138.7	35.9	5.8e-35
lcl|SIZZ01000001.1_prot_TBR40033.1_1486	1	219	BAC0111cusR/ylcA	227	1	222	131.3	34.1	9.2e-33
lcl|SIZZ01000001.1_prot_TBR40033.1_1486	1	216	BAC0288nrsR	234	1	228	125.6	36.8	5e-31
lcl|SIZZ01000001.1_prot_TBR40033.1_1486	2	216	BAC0095crdR	213	4	208	69.7	26.4	3.3e-14
lcl|SIZZ01000001.1_prot_TBR40033.1_1486	2	117	BAC0022aioR/aoxR	442	7	123	65.5	34.7	6.2e-13
lcl|SIZZ01000001.1_prot_TBR40033.1_1486	3	116	BAC0467zraR/hydH	441	8	121	60.8	29.8	1.5e-11
lcl|SIZZ01000001.1_prot_TBR40033.1_1486	32	127	BAC0089corR	466	35	131	57	35.1	2.2e-10
lcl|SIZZ01000001.1_prot_TBR40034.1_1487	154	457	BAC0488pmrB	364	37	336	110.9	32.1	2.7e-26
lcl|SIZZ01000001.1_prot_TBR40034.1_1487	180	459	BAC0348silS	497	182	469	107.8	29.9	2.3e-25
lcl|SIZZ01000001.1_prot_TBR40034.1_1487	190	458	BAC0752copS	445	170	445	102.1	31.1	1.3e-23
lcl|SIZZ01000001.1_prot_TBR40034.1_1487	258	454	BAC0289nrsS	454	224	424	100.9	34.5	2.8e-23
lcl|SIZZ01000001.1_prot_TBR40034.1_1487	188	463	BAC0720copS	477	185	463	98.6	30.2	1.4e-22
lcl|SIZZ01000001.1_prot_TBR40034.1_1487	182	476	BAC0112cusS	480	187	480	92.8	27.7	7.7e-21
lcl|SIZZ01000001.1_prot_TBR40034.1_1487	26	458	BAC0637copS	462	2	439	89.4	24.8	8.5e-20
lcl|SIZZ01000001.1_prot_TBR40034.1_1487	23	480	BAC0126czcS	476	11	458	89.4	25.2	8.5e-20
lcl|SIZZ01000001.1_prot_TBR40034.1_1487	175	455	BAC0198irlS	464	162	440	87.8	27.1	2.5e-19
lcl|SIZZ01000001.1_prot_TBR40034.1_1487	97	458	BAC0309pcoS	466	81	448	82	24.7	1.4e-17
lcl|SIZZ01000001.1_prot_TBR40034.1_1487	186	459	BAC0091corS	491	203	471	77.4	28.5	3.4e-16
lcl|SIZZ01000001.1_prot_TBR40034.1_1487	188	443	BAC0537copS	487	167	418	75.9	27.1	9.8e-16
lcl|SIZZ01000001.1_prot_TBR40034.1_1487	263	459	BAC0468zraS/hydG	465	250	439	72	27.3	1.4e-14
lcl|SIZZ01000001.1_prot_TBR40034.1_1487	255	470	BAC0023aioS/aoxS	488	261	470	38.9	25.4	0.00013
lcl|SIZZ01000001.1_prot_TBR40036.1_1490	65	457	BAC0374srpC	470	62	463	93.2	22.8	5.7e-21
lcl|SIZZ01000001.1_prot_TBR40038.1_1492	22	231	BAC0274nikE	268	18	231	114.4	36.3	1.3e-27
lcl|SIZZ01000001.1_prot_TBR40038.1_1492	13	231	BAC0162fbpC	356	12	225	112.5	33.6	4.9e-27
lcl|SIZZ01000001.1_prot_TBR40038.1_1492	33	230	BAC0611modC	352	13	207	104.4	35.3	1.3e-24
lcl|SIZZ01000001.1_prot_TBR40038.1_1492	32	231	BAC0604wtpC	344	16	210	103.6	33	2.3e-24
lcl|SIZZ01000001.1_prot_TBR40038.1_1492	17	225	BAC0465znuC/yebM	251	9	194	99.8	35	3.3e-23
lcl|SIZZ01000001.1_prot_TBR40038.1_1492	11	230	BAC0607tupC	214	1	207	93.2	29.4	3.1e-21
lcl|SIZZ01000001.1_prot_TBR40038.1_1492	10	239	BAC0433ybtQ	600	341	566	91.3	28.5	1.2e-20
lcl|SIZZ01000001.1_prot_TBR40038.1_1492	11	249	BAC0164fecE	255	1	233	90.9	30.2	1.5e-20
lcl|SIZZ01000001.1_prot_TBR40038.1_1492	12	225	BAC0400troB	266	10	216	90.1	34.5	2.6e-20
lcl|SIZZ01000001.1_prot_TBR40038.1_1492	46	248	BAC0600modC	253	31	239	89.4	32.1	4.4e-20
lcl|SIZZ01000001.1_prot_TBR40038.1_1492	32	230	BAC0432ybtP	600	360	556	86.7	32.5	2.9e-19
lcl|SIZZ01000001.1_prot_TBR40038.1_1492	10	212	BAC0440yfeB	296	8	205	80.1	29.8	2.7e-17
lcl|SIZZ01000001.1_prot_TBR40038.1_1492	31	231	BAC0273nikD	254	18	220	75.5	29.4	6.6e-16
lcl|SIZZ01000001.1_prot_TBR40038.1_1492	22	249	BAC0316pstB	257	18	248	71.6	27.4	9.6e-15
lcl|SIZZ01000001.1_prot_TBR40038.1_1492	31	231	BAC0311pgpA/ltpgpA	1548	649	834	64.3	28.1	1.5e-12
lcl|SIZZ01000001.1_prot_TBR40047.1_1501	16	227	BAC0274nikE	268	27	233	73.2	30	3.3e-15
lcl|SIZZ01000001.1_prot_TBR40047.1_1501	1	229	BAC0604wtpC	344	1	214	72	28.8	7.5e-15
lcl|SIZZ01000001.1_prot_TBR40047.1_1501	2	227	BAC0607tupC	214	3	210	66.6	24.7	3.1e-13
lcl|SIZZ01000001.1_prot_TBR40047.1_1501	2	227	BAC0400troB	266	11	229	52.8	22.9	4.7e-09
lcl|SIZZ01000001.1_prot_TBR40047.1_1501	20	228	BAC0611modC	352	17	211	52.4	27.4	6.1e-09
lcl|SIZZ01000001.1_prot_TBR40047.1_1501	1	226	BAC0162fbpC	356	11	226	50.8	21.3	1.8e-08
lcl|SIZZ01000001.1_prot_TBR40047.1_1501	14	229	BAC0311pgpA/ltpgpA	1548	647	838	50.4	26.7	2.3e-08
lcl|SIZZ01000001.1_prot_TBR40047.1_1501	2	228	BAC0164fecE	255	3	220	49.7	21.1	4e-08
lcl|SIZZ01000001.1_prot_TBR40047.1_1501	2	177	BAC0316pstB	257	11	185	46.2	24.2	4.4e-07
lcl|SIZZ01000001.1_prot_TBR40047.1_1501	2	228	BAC0433ybtQ	600	344	561	45.8	23.3	5.7e-07
lcl|SIZZ01000001.1_prot_TBR40047.1_1501	16	229	BAC0273nikD	254	18	224	44.7	24.1	1.3e-06
lcl|SIZZ01000001.1_prot_TBR40047.1_1501	17	234	BAC0432ybtP	600	360	566	44.3	22.2	1.7e-06
lcl|SIZZ01000001.1_prot_TBR40047.1_1501	1	49	BAC0465znuC/yebM	251	4	52	42.7	36.7	4.8e-06
lcl|SIZZ01000001.1_prot_TBR40051.1_1506	1	1020	BAC0119czcA	1063	1	1033	743	40.8	3e-216
lcl|SIZZ01000001.1_prot_TBR40051.1_1506	1	1028	BAC0130czrA	1051	1	1041	720.7	39.9	1.6e-209
lcl|SIZZ01000001.1_prot_TBR40051.1_1506	1	1029	BAC0267nczA	1043	1	1040	697.2	40.8	1.9e-202
lcl|SIZZ01000001.1_prot_TBR40051.1_1506	1	1029	BAC0549nccA	1076	1	1065	627.1	36.6	2.4e-181
lcl|SIZZ01000001.1_prot_TBR40051.1_1506	1	1020	BAC0127cznA	1019	1	1008	622.1	36.7	7.8e-180
lcl|SIZZ01000001.1_prot_TBR40051.1_1506	1	1019	BAC0203cnrA	1076	1	1055	620.2	37	3e-179
lcl|SIZZ01000001.1_prot_TBR40051.1_1506	1	1029	BAC0107cusA/ybdE	1047	1	1046	578.6	34.8	9.9e-167
lcl|SIZZ01000001.1_prot_TBR40051.1_1506	1	1021	BAC0341silA	1048	1	1036	573.9	34.8	2.4e-165
lcl|SIZZ01000001.1_prot_TBR40051.1_1506	1	1027	BAC0286nrsA	1054	5	1031	568.5	34.4	1e-163
lcl|SIZZ01000001.1_prot_TBR40051.1_1506	15	1020	BAC0646mdtB	1040	25	1019	263.8	25.6	5.4e-72
lcl|SIZZ01000001.1_prot_TBR40051.1_1506	14	1029	BAC0647mdtC	1026	15	1014	260.8	24.4	4.6e-71
lcl|SIZZ01000001.1_prot_TBR40051.1_1506	21	1026	BAC0563acrD	1037	17	1029	235.3	23.8	2.1e-63
lcl|SIZZ01000001.1_prot_TBR40051.1_1506	62	337	BAC0543cnrA	304	1	300	203	38.2	1.1e-53
lcl|SIZZ01000001.1_prot_TBR40051.1_1506	62	337	BAC0542cnrA	304	1	300	202.6	38.2	1.5e-53
lcl|SIZZ01000001.1_prot_TBR40051.1_1506	62	337	BAC0544cnrA	304	1	300	193.7	36.9	6.9e-51
lcl|SIZZ01000001.1_prot_TBR40736.1_1507	23	349	BAC0131czrB	405	97	398	115.2	29	1.1e-27
lcl|SIZZ01000001.1_prot_TBR40736.1_1507	22	355	BAC0550nccB	397	61	395	113.2	29.3	4.1e-27
lcl|SIZZ01000001.1_prot_TBR40736.1_1507	23	350	BAC0120czcB	520	181	514	111.7	28.9	1.2e-26
lcl|SIZZ01000001.1_prot_TBR40736.1_1507	23	355	BAC0204cnrB	395	60	393	110.9	29.2	2e-26
lcl|SIZZ01000001.1_prot_TBR40736.1_1507	11	320	BAC0460zneB/hmxB	385	40	360	73.2	24.9	4.7e-15
lcl|SIZZ01000001.1_prot_TBR40736.1_1507	12	343	BAC0342silB	430	75	393	70.9	22.9	2.3e-14
lcl|SIZZ01000001.1_prot_TBR40064.1_1522	2	142	BAC0288nrsR	234	1	141	59.7	29.4	3e-11
lcl|SIZZ01000001.1_prot_TBR40064.1_1522	4	179	BAC0089corR	466	7	185	50.8	26.4	1.4e-08
lcl|SIZZ01000001.1_prot_TBR40064.1_1522	2	149	BAC0638copR	231	1	144	42.7	26.6	3.8e-06
lcl|SIZZ01000001.1_prot_TBR40064.1_1522	49	124	BAC0753copR	227	46	121	39.3	27.6	4.2e-05
lcl|SIZZ01000001.1_prot_TBR40067.1_1526	34	228	BAC0604wtpC	344	26	227	101.3	33.7	1.4e-23
lcl|SIZZ01000001.1_prot_TBR40067.1_1526	8	202	BAC0465znuC/yebM	251	4	191	99.8	34.3	4e-23
lcl|SIZZ01000001.1_prot_TBR40067.1_1526	7	215	BAC0162fbpC	356	10	229	97.1	29.1	2.6e-22
lcl|SIZZ01000001.1_prot_TBR40067.1_1526	36	219	BAC0611modC	352	26	216	95.5	33.9	7.6e-22
lcl|SIZZ01000001.1_prot_TBR40067.1_1526	11	210	BAC0607tupC	214	5	207	90.5	28.3	2.4e-20
lcl|SIZZ01000001.1_prot_TBR40067.1_1526	3	216	BAC0400troB	266	5	226	89	29.3	7.1e-20
lcl|SIZZ01000001.1_prot_TBR40067.1_1526	18	228	BAC0164fecE	255	12	234	87.8	29.4	1.6e-19
lcl|SIZZ01000001.1_prot_TBR40067.1_1526	5	217	BAC0440yfeB	296	7	230	86.7	28.6	3.5e-19
lcl|SIZZ01000001.1_prot_TBR40067.1_1526	17	218	BAC0274nikE	268	21	238	74.7	28.8	1.4e-15
lcl|SIZZ01000001.1_prot_TBR40067.1_1526	7	215	BAC0433ybtQ	600	331	562	70.9	26.3	2e-14
lcl|SIZZ01000001.1_prot_TBR40067.1_1526	37	211	BAC0600modC	253	30	222	67	28.5	2.9e-13
lcl|SIZZ01000001.1_prot_TBR40067.1_1526	24	219	BAC0273nikD	254	19	228	63.2	25.7	4.2e-12
lcl|SIZZ01000001.1_prot_TBR40067.1_1526	23	242	BAC0432ybtP	600	359	585	62.4	28.1	7.1e-12
lcl|SIZZ01000001.1_prot_TBR40067.1_1526	27	214	BAC0311pgpA/ltpgpA	1548	653	837	61.2	28.1	1.6e-11
lcl|SIZZ01000001.1_prot_TBR40092.1_1552	506	728	BAC0289nrsS	454	217	442	95.1	33.2	2.4e-21
lcl|SIZZ01000001.1_prot_TBR40092.1_1552	508	730	BAC0198irlS	464	238	459	91.3	31.6	3.4e-20
lcl|SIZZ01000001.1_prot_TBR40092.1_1552	520	728	BAC0468zraS/hydG	465	252	452	88.2	30.2	2.9e-19
lcl|SIZZ01000001.1_prot_TBR40092.1_1552	503	729	BAC0112cusS	480	252	477	84.7	29.8	3.2e-18
lcl|SIZZ01000001.1_prot_TBR40092.1_1552	520	714	BAC0309pcoS	466	255	448	79.7	32.5	1e-16
lcl|SIZZ01000001.1_prot_TBR40092.1_1552	520	728	BAC0637copS	462	245	452	77.4	28.6	5.1e-16
lcl|SIZZ01000001.1_prot_TBR40092.1_1552	503	734	BAC0720copS	477	247	477	77	26	6.7e-16
lcl|SIZZ01000001.1_prot_TBR40092.1_1552	508	712	BAC0488pmrB	364	139	335	70.5	27	6.3e-14
lcl|SIZZ01000001.1_prot_TBR40092.1_1552	520	714	BAC0752copS	445	251	445	68.2	27.5	3.1e-13
lcl|SIZZ01000001.1_prot_TBR40092.1_1552	503	733	BAC0348silS	497	253	486	67	25.9	7e-13
lcl|SIZZ01000001.1_prot_TBR40092.1_1552	520	697	BAC0537copS	487	243	420	50.1	25.4	8.8e-08
lcl|SIZZ01000001.1_prot_TBR40741.1_1553	1	236	BAC0197irlR	229	1	227	100.1	32.1	2.5e-23
lcl|SIZZ01000001.1_prot_TBR40741.1_1553	1	230	BAC0111cusR/ylcA	227	1	223	93.6	29.6	2.4e-21
lcl|SIZZ01000001.1_prot_TBR40741.1_1553	1	186	BAC0638copR	231	1	180	87	32.4	2.2e-19
lcl|SIZZ01000001.1_prot_TBR40741.1_1553	1	230	BAC0288nrsR	234	1	232	86.7	28.8	2.9e-19
lcl|SIZZ01000001.1_prot_TBR40741.1_1553	1	230	BAC0753copR	227	1	223	86.3	29.6	3.8e-19
lcl|SIZZ01000001.1_prot_TBR40741.1_1553	1	186	BAC0083copR	227	1	180	85.5	32.4	6.5e-19
lcl|SIZZ01000001.1_prot_TBR40741.1_1553	1	229	BAC0125czcR	225	1	220	84.7	26.6	1.1e-18
lcl|SIZZ01000001.1_prot_TBR40741.1_1553	1	229	BAC0719copR	230	1	222	84.7	27.5	1.1e-18
lcl|SIZZ01000001.1_prot_TBR40741.1_1553	2	230	BAC0308pcoR	226	3	223	81.3	27.5	1.2e-17
lcl|SIZZ01000001.1_prot_TBR40741.1_1553	1	230	BAC0347silR	228	1	225	79	30.5	6.1e-17
lcl|SIZZ01000001.1_prot_TBR40741.1_1553	2	227	BAC0095crdR	213	4	209	75.1	26.3	8.7e-16
lcl|SIZZ01000001.1_prot_TBR40741.1_1553	1	205	BAC0487pmrA	222	1	198	66.6	24.8	3.1e-13
lcl|SIZZ01000001.1_prot_TBR40741.1_1553	3	110	BAC0089corR	466	7	114	59.3	30.9	5e-11
lcl|SIZZ01000001.1_prot_TBR40741.1_1553	3	104	BAC0467zraR/hydH	441	8	108	47.8	23.5	1.5e-07
lcl|SIZZ01000001.1_prot_TBR40111.1_1576	1	188	BAC0028chrC	202	1	189	70.9	29.6	1.3e-14
lcl|SIZZ01000001.1_prot_TBR40111.1_1576	74	192	BAC0547chrC	197	75	192	69.7	36.9	2.8e-14
lcl|SIZZ01000001.1_prot_TBR40747.1_1592	6	212	BAC0607tupC	214	8	212	104.4	31.9	1.7e-24
lcl|SIZZ01000001.1_prot_TBR40747.1_1592	1	230	BAC0164fecE	255	3	239	99.8	28.7	4.1e-23
lcl|SIZZ01000001.1_prot_TBR40747.1_1592	1	264	BAC0162fbpC	356	12	289	99.4	26.1	5.3e-23
lcl|SIZZ01000001.1_prot_TBR40747.1_1592	1	258	BAC0604wtpC	344	2	248	98.6	28.1	9.1e-23
lcl|SIZZ01000001.1_prot_TBR40747.1_1592	6	226	BAC0400troB	266	16	239	97.1	30.7	2.6e-22
lcl|SIZZ01000001.1_prot_TBR40747.1_1592	1	197	BAC0316pstB	257	11	218	95.9	32.9	5.9e-22
lcl|SIZZ01000001.1_prot_TBR40747.1_1592	23	219	BAC0611modC	352	21	218	92	31.7	8.5e-21
lcl|SIZZ01000001.1_prot_TBR40747.1_1592	33	195	BAC0600modC	253	34	207	90.9	35.4	1.9e-20
lcl|SIZZ01000001.1_prot_TBR40747.1_1592	11	217	BAC0433ybtQ	600	356	566	90.5	28.2	2.5e-20
lcl|SIZZ01000001.1_prot_TBR40747.1_1592	14	220	BAC0440yfeB	296	25	236	89.7	30.7	4.2e-20
lcl|SIZZ01000001.1_prot_TBR40747.1_1592	10	214	BAC0465znuC/yebM	251	14	204	87.8	32.7	1.6e-19
lcl|SIZZ01000001.1_prot_TBR40747.1_1592	15	217	BAC0432ybtP	600	359	565	83.2	27.1	3.9e-18
lcl|SIZZ01000001.1_prot_TBR40747.1_1592	16	209	BAC0274nikE	268	28	231	71.2	29.9	1.6e-14
lcl|SIZZ01000001.1_prot_TBR40747.1_1592	18	212	BAC0311pgpA/ltpgpA	1548	652	837	54.3	25.1	2e-09
lcl|SIZZ01000001.1_prot_TBR40747.1_1592	16	212	BAC0273nikD	254	19	223	43.5	25.5	3.5e-06
lcl|SIZZ01000001.1_prot_TBR40129.1_1597	20	276	BAC0088corC	292	23	279	239.2	48.1	3.9e-65
lcl|SIZZ01000001.1_prot_TBR40129.1_1597	64	276	BAC0643corB	227	1	215	96.3	24.5	4.1e-22
lcl|SIZZ01000001.1_prot_TBR40131.1_1599	50	337	BAC0641corA	316	27	315	53.1	23.2	4.8e-09
lcl|SIZZ01000001.1_prot_TBR40131.1_1599	50	337	BAC0086corA	316	27	315	52	21.7	1.1e-08
lcl|SIZZ01000001.1_prot_TBR40750.1_1633	152	404	BAC0468zraS/hydG	465	211	458	51.2	24.8	2.2e-08
lcl|SIZZ01000001.1_prot_TBR40750.1_1633	186	347	BAC0537copS	487	230	390	41.6	22.4	1.7e-05
lcl|SIZZ01000001.1_prot_TBR40163.1_1634	9	112	BAC0467zraR/hydH	441	8	111	73.6	35.6	1.9e-15
lcl|SIZZ01000001.1_prot_TBR40163.1_1634	141	180	BAC0467zraR/hydH	441	402	441	32	45	0.0064
lcl|SIZZ01000001.1_prot_TBR40163.1_1634	4	112	BAC0089corR	466	1	109	67	33.9	1.8e-13
lcl|SIZZ01000001.1_prot_TBR40163.1_1634	9	133	BAC0487pmrA	222	3	130	61.6	35.9	7.6e-12
lcl|SIZZ01000001.1_prot_TBR40163.1_1634	9	125	BAC0022aioR/aoxR	442	8	121	48.5	33.6	6.6e-08
lcl|SIZZ01000001.1_prot_TBR40167.1_1640	1	117	BAC0084copY/tcrY	145	8	124	68.9	29.1	3e-14
lcl|SIZZ01000001.1_prot_TBR40169.1_1642	48	312	BAC0537copS	487	162	416	51.2	23.4	1.7e-08
lcl|SIZZ01000001.1_prot_TBR40169.1_1642	35	250	BAC0488pmrB	364	66	266	50.1	27.1	3.9e-08
lcl|SIZZ01000001.1_prot_TBR40169.1_1642	105	320	BAC0289nrsS	454	202	445	45.4	24.4	9.6e-07
lcl|SIZZ01000001.1_prot_TBR40170.1_1643	11	229	BAC0719copR	230	3	221	162.5	41.8	3.9e-42
lcl|SIZZ01000001.1_prot_TBR40170.1_1643	11	229	BAC0125czcR	225	3	219	158.3	40.5	7.4e-41
lcl|SIZZ01000001.1_prot_TBR40170.1_1643	11	239	BAC0197irlR	229	3	226	154.1	39.1	1.4e-39
lcl|SIZZ01000001.1_prot_TBR40170.1_1643	11	229	BAC0308pcoR	226	4	221	151	39.8	1.2e-38
lcl|SIZZ01000001.1_prot_TBR40170.1_1643	11	229	BAC0111cusR/ylcA	227	3	221	150.6	38	1.6e-38
lcl|SIZZ01000001.1_prot_TBR40170.1_1643	11	229	BAC0083copR	227	3	221	149.1	39.4	4.5e-38
lcl|SIZZ01000001.1_prot_TBR40170.1_1643	11	229	BAC0638copR	231	3	221	148.3	38.9	7.7e-38
lcl|SIZZ01000001.1_prot_TBR40170.1_1643	11	235	BAC0753copR	227	3	227	144.4	40.1	1.1e-36
lcl|SIZZ01000001.1_prot_TBR40170.1_1643	11	229	BAC0347silR	228	3	223	142.5	37.8	4.2e-36
lcl|SIZZ01000001.1_prot_TBR40170.1_1643	11	229	BAC0487pmrA	222	3	216	121.3	37.1	1e-29
lcl|SIZZ01000001.1_prot_TBR40170.1_1643	11	228	BAC0288nrsR	234	3	229	119.8	34.9	2.9e-29
lcl|SIZZ01000001.1_prot_TBR40170.1_1643	11	232	BAC0095crdR	213	5	213	94.4	27.9	1.3e-21
lcl|SIZZ01000001.1_prot_TBR40170.1_1643	11	129	BAC0089corR	466	7	123	65.1	31.9	8.6e-13
lcl|SIZZ01000001.1_prot_TBR40170.1_1643	11	138	BAC0467zraR/hydH	441	8	135	59.7	30.2	3.6e-11
lcl|SIZZ01000001.1_prot_TBR40170.1_1643	7	126	BAC0022aioR/aoxR	442	4	123	55.8	27	5.2e-10
lcl|SIZZ01000001.1_prot_TBR40172.1_1645	27	225	BAC0274nikE	268	27	231	108.2	37.7	8.6e-26
lcl|SIZZ01000001.1_prot_TBR40172.1_1645	28	205	BAC0604wtpC	344	16	189	104.8	34.4	9.5e-25
lcl|SIZZ01000001.1_prot_TBR40172.1_1645	5	206	BAC0162fbpC	356	8	205	100.9	31.9	1.4e-23
lcl|SIZZ01000001.1_prot_TBR40172.1_1645	43	207	BAC0600modC	253	32	203	98.6	37.2	6.8e-23
lcl|SIZZ01000001.1_prot_TBR40172.1_1645	23	224	BAC0607tupC	214	13	207	98.2	31.7	8.9e-23
lcl|SIZZ01000001.1_prot_TBR40172.1_1645	42	224	BAC0611modC	352	28	207	94	32.1	1.7e-21
lcl|SIZZ01000001.1_prot_TBR40172.1_1645	23	216	BAC0316pstB	257	21	221	80.9	32	1.5e-17
lcl|SIZZ01000001.1_prot_TBR40172.1_1645	17	227	BAC0433ybtQ	600	350	560	80.9	29.5	1.5e-17
lcl|SIZZ01000001.1_prot_TBR40172.1_1645	23	206	BAC0465znuC/yebM	251	15	180	77	31	2.1e-16
lcl|SIZZ01000001.1_prot_TBR40172.1_1645	24	233	BAC0400troB	266	22	229	76.6	30.5	2.8e-16
lcl|SIZZ01000001.1_prot_TBR40172.1_1645	27	227	BAC0273nikD	254	18	222	74.3	31.9	1.4e-15
lcl|SIZZ01000001.1_prot_TBR40172.1_1645	28	224	BAC0432ybtP	600	360	556	71.6	30.9	8.9e-15
lcl|SIZZ01000001.1_prot_TBR40172.1_1645	6	206	BAC0440yfeB	296	8	205	70.1	29.9	2.6e-14
lcl|SIZZ01000001.1_prot_TBR40172.1_1645	15	227	BAC0164fecE	255	5	219	63.5	29.6	2.4e-12
lcl|SIZZ01000001.1_prot_TBR40172.1_1645	26	225	BAC0311pgpA/ltpgpA	1548	648	834	60.5	29.3	2.1e-11
lcl|SIZZ01000001.1_prot_TBR40187.1_1660	1892	2009	BAC0125czcR	225	3	117	63.5	33.1	2.1e-11
lcl|SIZZ01000001.1_prot_TBR40187.1_1660	1914	2016	BAC0638copR	231	25	127	62.8	32.4	3.6e-11
lcl|SIZZ01000001.1_prot_TBR40187.1_1660	1914	2009	BAC0083copR	227	25	118	61.2	31.2	1e-10
lcl|SIZZ01000001.1_prot_TBR40187.1_1660	1889	2013	BAC0089corR	466	4	125	60.5	32.8	1.8e-10
lcl|SIZZ01000001.1_prot_TBR40187.1_1660	1892	2013	BAC0095crdR	213	5	125	59.3	30.3	4e-10
lcl|SIZZ01000001.1_prot_TBR40187.1_1660	1892	2009	BAC0753copR	227	3	118	58.2	27.1	8.8e-10
lcl|SIZZ01000001.1_prot_TBR40187.1_1660	1892	2007	BAC0467zraR/hydH	441	8	121	57.4	32.5	1.5e-09
lcl|SIZZ01000001.1_prot_TBR40187.1_1660	1892	2009	BAC0347silR	228	3	118	55.8	25.4	4.4e-09
lcl|SIZZ01000001.1_prot_TBR40187.1_1660	1892	2014	BAC0719copR	230	3	123	55.5	26	5.7e-09
lcl|SIZZ01000001.1_prot_TBR40187.1_1660	1892	2009	BAC0308pcoR	226	4	119	54.7	22.9	9.7e-09
lcl|SIZZ01000001.1_prot_TBR40187.1_1660	1892	2011	BAC0111cusR/ylcA	227	3	120	53.5	25.8	2.2e-08
lcl|SIZZ01000001.1_prot_TBR40187.1_1660	1892	2011	BAC0288nrsR	234	3	121	52.4	27.9	4.8e-08
lcl|SIZZ01000001.1_prot_TBR40187.1_1660	1617	1726	BAC0468zraS/hydG	465	376	458	50.4	31.8	1.8e-07
lcl|SIZZ01000001.1_prot_TBR40189.1_1663	4	119	BAC0638copR	231	3	116	72.4	33.6	2.8e-15
lcl|SIZZ01000001.1_prot_TBR40189.1_1663	4	119	BAC0753copR	227	3	116	71.6	36.2	4.7e-15
lcl|SIZZ01000001.1_prot_TBR40189.1_1663	4	119	BAC0083copR	227	3	116	70.5	33.6	1e-14
lcl|SIZZ01000001.1_prot_TBR40189.1_1663	4	119	BAC0719copR	230	3	116	67.4	34.5	8.9e-14
lcl|SIZZ01000001.1_prot_TBR40189.1_1663	4	119	BAC0197irlR	229	3	115	66.6	31.9	1.5e-13
lcl|SIZZ01000001.1_prot_TBR40189.1_1663	4	119	BAC0125czcR	225	3	115	64.7	29.3	5.7e-13
lcl|SIZZ01000001.1_prot_TBR40189.1_1663	1	122	BAC0308pcoR	226	1	120	64.7	31.1	5.7e-13
lcl|SIZZ01000001.1_prot_TBR40189.1_1663	4	123	BAC0111cusR/ylcA	227	3	120	61.6	31.7	4.9e-12
lcl|SIZZ01000001.1_prot_TBR40189.1_1663	4	119	BAC0347silR	228	3	116	59.3	31.9	2.4e-11
lcl|SIZZ01000001.1_prot_TBR40189.1_1663	3	119	BAC0467zraR/hydH	441	7	121	56.6	27.4	1.6e-10
lcl|SIZZ01000001.1_prot_TBR40189.1_1663	4	121	BAC0022aioR/aoxR	442	8	124	48.1	30.8	5.6e-08
lcl|SIZZ01000001.1_prot_TBR40189.1_1663	4	119	BAC0487pmrA	222	3	116	46.6	27.6	1.6e-07
lcl|SIZZ01000001.1_prot_TBR40189.1_1663	4	115	BAC0095crdR	213	5	115	45.1	27.7	4.7e-07
lcl|SIZZ01000001.1_prot_TBR40754.1_1664	9	122	BAC0083copR	227	1	112	67.8	29.8	7.1e-14
lcl|SIZZ01000001.1_prot_TBR40754.1_1664	9	124	BAC0125czcR	225	1	113	67.8	34.5	7.1e-14
lcl|SIZZ01000001.1_prot_TBR40754.1_1664	10	122	BAC0308pcoR	226	3	113	65.1	29.2	4.6e-13
lcl|SIZZ01000001.1_prot_TBR40754.1_1664	9	122	BAC0638copR	231	1	112	62.8	29.8	2.3e-12
lcl|SIZZ01000001.1_prot_TBR40754.1_1664	9	118	BAC0487pmrA	222	1	108	55.5	31.5	3.7e-10
lcl|SIZZ01000001.1_prot_TBR40754.1_1664	9	122	BAC0197irlR	229	1	111	54.3	23.7	8.1e-10
lcl|SIZZ01000001.1_prot_TBR40754.1_1664	9	122	BAC0719copR	230	1	112	54.3	24.6	8.1e-10
lcl|SIZZ01000001.1_prot_TBR40754.1_1664	9	122	BAC0753copR	227	1	112	53.9	26.7	1.1e-09
lcl|SIZZ01000001.1_prot_TBR40754.1_1664	9	122	BAC0288nrsR	234	1	114	53.1	26.7	1.8e-09
lcl|SIZZ01000001.1_prot_TBR40754.1_1664	9	122	BAC0111cusR/ylcA	227	1	112	51.6	24.6	5.3e-09
lcl|SIZZ01000001.1_prot_TBR40754.1_1664	9	122	BAC0347silR	228	1	112	50.1	23.7	1.5e-08
lcl|SIZZ01000001.1_prot_TBR40224.1_1701	242	457	BAC0468zraS/hydG	465	228	456	88.6	29.3	1.4e-19
lcl|SIZZ01000001.1_prot_TBR40224.1_1701	205	456	BAC0091corS	491	239	487	80.1	27	4.9e-17
lcl|SIZZ01000001.1_prot_TBR40224.1_1701	261	457	BAC0289nrsS	454	232	446	56.6	25.9	5.8e-10
lcl|SIZZ01000001.1_prot_TBR40224.1_1701	260	439	BAC0752copS	445	251	445	47.4	24.6	3.5e-07
lcl|SIZZ01000001.1_prot_TBR40224.1_1701	354	456	BAC0720copS	477	367	474	45.8	30.3	1e-06
lcl|SIZZ01000001.1_prot_TBR40224.1_1701	354	437	BAC0198irlS	464	352	441	43.5	33.3	5.1e-06
lcl|SIZZ01000001.1_prot_TBR40224.1_1701	354	460	BAC0126czcS	476	345	457	38.1	25.7	0.00022
lcl|SIZZ01000001.1_prot_TBR40226.1_1703	3	442	BAC0089corR	466	6	457	285	39.1	9.8e-79
lcl|SIZZ01000001.1_prot_TBR40226.1_1703	4	439	BAC0467zraR/hydH	441	8	441	266.2	37.9	4.7e-73
lcl|SIZZ01000001.1_prot_TBR40226.1_1703	4	445	BAC0022aioR/aoxR	442	8	437	223.8	33.7	2.7e-60
lcl|SIZZ01000001.1_prot_TBR40226.1_1703	4	156	BAC0753copR	227	3	156	57.4	32.9	3.3e-10
lcl|SIZZ01000001.1_prot_TBR40226.1_1703	4	135	BAC0125czcR	225	3	127	51.2	31.8	2.4e-08
lcl|SIZZ01000001.1_prot_TBR40226.1_1703	4	121	BAC0288nrsR	234	3	117	47.8	29.7	2.6e-07
lcl|SIZZ01000001.1_prot_TBR40226.1_1703	37	163	BAC0719copR	230	36	164	42	30.6	1.4e-05
lcl|SIZZ01000001.1_prot_TBR40235.1_1713	1	223	BAC0604wtpC	344	1	214	118.6	33.3	6.5e-29
lcl|SIZZ01000001.1_prot_TBR40235.1_1713	1	226	BAC0162fbpC	356	11	231	117.9	33.9	1.1e-28
lcl|SIZZ01000001.1_prot_TBR40235.1_1713	25	223	BAC0607tupC	214	22	211	98.2	29.5	9.1e-23
lcl|SIZZ01000001.1_prot_TBR40235.1_1713	21	220	BAC0274nikE	268	28	232	96.3	35.1	3.5e-22
lcl|SIZZ01000001.1_prot_TBR40235.1_1713	19	206	BAC0316pstB	257	24	217	95.5	33.8	5.9e-22
lcl|SIZZ01000001.1_prot_TBR40235.1_1713	34	219	BAC0600modC	253	30	222	93.2	35.2	2.9e-21
lcl|SIZZ01000001.1_prot_TBR40235.1_1713	2	219	BAC0400troB	266	11	221	80.1	29.4	2.6e-17
lcl|SIZZ01000001.1_prot_TBR40235.1_1713	25	220	BAC0273nikD	254	23	221	76.6	31.2	2.8e-16
lcl|SIZZ01000001.1_prot_TBR40235.1_1713	20	200	BAC0440yfeB	296	26	205	75.9	31.5	4.9e-16
lcl|SIZZ01000001.1_prot_TBR40235.1_1713	21	203	BAC0465znuC/yebM	251	20	183	75.5	30.4	6.3e-16
lcl|SIZZ01000001.1_prot_TBR40235.1_1713	35	218	BAC0611modC	352	28	207	74.7	31.7	1.1e-15
lcl|SIZZ01000001.1_prot_TBR40235.1_1713	20	237	BAC0432ybtP	600	359	570	72	27.4	7e-15
lcl|SIZZ01000001.1_prot_TBR40235.1_1713	2	206	BAC0164fecE	255	3	203	68.9	27.8	5.9e-14
lcl|SIZZ01000001.1_prot_TBR40235.1_1713	11	234	BAC0433ybtQ	600	351	575	67	25.1	2.3e-13
lcl|SIZZ01000001.1_prot_TBR40235.1_1713	14	219	BAC0311pgpA/ltpgpA	1548	643	834	47.4	24.9	1.9e-07
lcl|SIZZ01000001.1_prot_TBR40236.1_1714	90	404	BAC0120czcB	520	230	498	56.6	23.4	5.4e-10
lcl|SIZZ01000001.1_prot_TBR40236.1_1714	90	405	BAC0550nccB	397	111	377	52.8	22.9	7.8e-09
lcl|SIZZ01000001.1_prot_TBR40236.1_1714	46	405	BAC0204cnrB	395	67	375	49.7	22.3	6.6e-08
lcl|SIZZ01000001.1_prot_TBR40236.1_1714	242	410	BAC0131czrB	405	218	389	46.2	24.3	7.3e-07
lcl|SIZZ01000001.1_prot_TBR40242.1_1720	6	218	BAC0164fecE	255	3	224	90.9	28.3	1.9e-20
lcl|SIZZ01000001.1_prot_TBR40242.1_1720	6	210	BAC0607tupC	214	3	207	84	30.1	2.3e-18
lcl|SIZZ01000001.1_prot_TBR40242.1_1720	11	216	BAC0162fbpC	356	17	230	83.6	26.4	3e-18
lcl|SIZZ01000001.1_prot_TBR40242.1_1720	15	205	BAC0465znuC/yebM	251	14	194	83.2	34.2	3.9e-18
lcl|SIZZ01000001.1_prot_TBR40242.1_1720	5	210	BAC0433ybtQ	600	332	557	80.9	29.2	1.9e-17
lcl|SIZZ01000001.1_prot_TBR40242.1_1720	28	218	BAC0611modC	352	21	215	79.7	31	4.3e-17
lcl|SIZZ01000001.1_prot_TBR40242.1_1720	4	205	BAC0400troB	266	9	216	77	26.7	2.8e-16
lcl|SIZZ01000001.1_prot_TBR40242.1_1720	5	210	BAC0604wtpC	344	1	209	76.6	28.8	3.6e-16
lcl|SIZZ01000001.1_prot_TBR40242.1_1720	3	207	BAC0440yfeB	296	10	221	71.2	28.9	1.5e-14
lcl|SIZZ01000001.1_prot_TBR40242.1_1720	20	213	BAC0432ybtP	600	359	559	69.7	27.9	4.4e-14
lcl|SIZZ01000001.1_prot_TBR40242.1_1720	14	210	BAC0274nikE	268	21	230	68.6	25.6	9.9e-14
lcl|SIZZ01000001.1_prot_TBR40242.1_1720	6	218	BAC0316pstB	257	11	238	62.8	25.2	5.4e-12
lcl|SIZZ01000001.1_prot_TBR40242.1_1720	18	210	BAC0311pgpA/ltpgpA	1548	647	833	55.8	25.6	6.6e-10
lcl|SIZZ01000001.1_prot_TBR40242.1_1720	36	219	BAC0600modC	253	32	227	52.4	23.9	7.3e-09
lcl|SIZZ01000001.1_prot_TBR40242.1_1720	24	227	BAC0273nikD	254	22	236	46.2	22.7	5.3e-07
lcl|SIZZ01000001.1_prot_TBR40260.1_1742	322	499	BAC0465znuC/yebM	251	4	180	83.2	31.9	7e-18
lcl|SIZZ01000001.1_prot_TBR40260.1_1742	323	499	BAC0400troB	266	11	202	80.5	28.1	4.5e-17
lcl|SIZZ01000001.1_prot_TBR40260.1_1742	323	514	BAC0607tupC	214	3	203	73.2	27.5	7.3e-15
lcl|SIZZ01000001.1_prot_TBR40260.1_1742	17	245	BAC0162fbpC	356	23	241	72	27.6	1.6e-14
lcl|SIZZ01000001.1_prot_TBR40260.1_1742	20	235	BAC0274nikE	268	27	229	70.1	23.7	6.1e-14
lcl|SIZZ01000001.1_prot_TBR40260.1_1742	322	477	BAC0604wtpC	344	1	164	66.6	29.1	6.8e-13
lcl|SIZZ01000001.1_prot_TBR40260.1_1742	323	498	BAC0433ybtQ	600	344	538	66.2	29.7	8.9e-13
lcl|SIZZ01000001.1_prot_TBR40260.1_1742	326	476	BAC0164fecE	255	6	171	64.3	29.6	3.4e-12
lcl|SIZZ01000001.1_prot_TBR40260.1_1742	309	486	BAC0432ybtP	600	327	523	62	27	1.7e-11
lcl|SIZZ01000001.1_prot_TBR40260.1_1742	36	235	BAC0611modC	352	29	206	60.1	25.6	6.4e-11
lcl|SIZZ01000001.1_prot_TBR40260.1_1742	21	206	BAC0440yfeB	296	27	191	53.1	25.7	7.8e-09
lcl|SIZZ01000001.1_prot_TBR40260.1_1742	162	238	BAC0600modC	253	143	223	49.3	34.6	1.1e-07
lcl|SIZZ01000001.1_prot_TBR40260.1_1742	17	217	BAC0316pstB	257	22	211	46.2	24.9	9.5e-07
lcl|SIZZ01000001.1_prot_TBR40260.1_1742	156	234	BAC0311pgpA/ltpgpA	1548	747	831	43.1	37.2	8e-06
lcl|SIZZ01000001.1_prot_TBR40260.1_1742	323	520	BAC0273nikD	254	5	221	39.3	21.1	0.00012
lcl|SIZZ01000001.1_prot_TBR40282.1_1767	24	241	BAC0138dsbC	236	18	226	147.5	33	1.3e-37
lcl|SIZZ01000001.1_prot_TBR40287.1_1773	13	587	BAC0432ybtP	600	19	594	214.2	32.2	2.8e-57
lcl|SIZZ01000001.1_prot_TBR40287.1_1773	29	568	BAC0433ybtQ	600	35	576	201.1	31.3	2.5e-53
lcl|SIZZ01000001.1_prot_TBR40287.1_1773	335	553	BAC0311pgpA/ltpgpA	1548	1284	1503	104.4	32.1	3.1e-24
lcl|SIZZ01000001.1_prot_TBR40287.1_1773	354	556	BAC0611modC	352	13	214	91.3	31.9	2.7e-20
lcl|SIZZ01000001.1_prot_TBR40287.1_1773	342	581	BAC0164fecE	255	10	246	85.9	28.5	1.2e-18
lcl|SIZZ01000001.1_prot_TBR40287.1_1773	352	561	BAC0316pstB	257	25	242	85.5	31	1.5e-18
lcl|SIZZ01000001.1_prot_TBR40287.1_1773	357	555	BAC0607tupC	214	22	213	79.7	30.1	8.2e-17
lcl|SIZZ01000001.1_prot_TBR40287.1_1773	350	551	BAC0274nikE	268	25	232	78.6	30.8	1.8e-16
lcl|SIZZ01000001.1_prot_TBR40287.1_1773	350	551	BAC0162fbpC	356	24	226	78.2	28.4	2.4e-16
lcl|SIZZ01000001.1_prot_TBR40287.1_1773	353	553	BAC0604wtpC	344	16	213	76.6	29.5	7e-16
lcl|SIZZ01000001.1_prot_TBR40287.1_1773	350	558	BAC0273nikD	254	16	228	73.9	27.9	4.5e-15
lcl|SIZZ01000001.1_prot_TBR40287.1_1773	350	587	BAC0400troB	266	23	256	68.9	26.3	1.5e-13
lcl|SIZZ01000001.1_prot_TBR40287.1_1773	366	548	BAC0600modC	253	30	220	63.9	29.2	4.7e-12
lcl|SIZZ01000001.1_prot_TBR40287.1_1773	331	546	BAC0440yfeB	296	5	221	63.9	24.8	4.7e-12
lcl|SIZZ01000001.1_prot_TBR40287.1_1773	337	505	BAC0465znuC/yebM	251	5	152	50.8	27.6	4.1e-08
lcl|SIZZ01000001.1_prot_TBR40292.1_1778	812	1035	BAC0348silS	497	257	484	87	29.3	1e-18
lcl|SIZZ01000001.1_prot_TBR40292.1_1778	808	1035	BAC0637copS	462	229	455	86.3	31	1.8e-18
lcl|SIZZ01000001.1_prot_TBR40292.1_1778	775	1037	BAC0468zraS/hydG	465	205	457	82.8	25.3	2e-17
lcl|SIZZ01000001.1_prot_TBR40292.1_1778	819	1038	BAC0198irlS	464	244	463	80.9	29.6	7.4e-17
lcl|SIZZ01000001.1_prot_TBR40292.1_1778	767	1036	BAC0289nrsS	454	189	446	77	25.5	1.1e-15
lcl|SIZZ01000001.1_prot_TBR40292.1_1778	812	1035	BAC0112cusS	480	256	479	75.9	29.3	2.4e-15
lcl|SIZZ01000001.1_prot_TBR40292.1_1778	770	1035	BAC0720copS	477	183	474	75.1	26.5	4.1e-15
lcl|SIZZ01000001.1_prot_TBR40292.1_1778	787	1018	BAC0752copS	445	202	445	67	27.7	1.1e-12
lcl|SIZZ01000001.1_prot_TBR40292.1_1778	819	1041	BAC0126czcS	476	237	459	65.5	24.7	3.2e-12
lcl|SIZZ01000001.1_prot_TBR40292.1_1778	1059	1176	BAC0083copR	227	1	112	60.1	28.8	1.4e-10
lcl|SIZZ01000001.1_prot_TBR40292.1_1778	1059	1169	BAC0753copR	227	1	108	60.1	32.4	1.4e-10
lcl|SIZZ01000001.1_prot_TBR40292.1_1778	820	1023	BAC0488pmrB	364	146	342	58.2	27.4	5.2e-10
lcl|SIZZ01000001.1_prot_TBR40292.1_1778	1059	1169	BAC0719copR	230	1	108	58.2	32.4	5.2e-10
lcl|SIZZ01000001.1_prot_TBR40292.1_1778	1059	1169	BAC0347silR	228	1	108	55.5	30.6	3.3e-09
lcl|SIZZ01000001.1_prot_TBR40292.1_1778	1059	1173	BAC0467zraR/hydH	441	6	117	55.5	27	3.3e-09
lcl|SIZZ01000001.1_prot_TBR40294.1_1780	6	461	BAC0374srpC	470	3	466	350.5	46	2e-98
lcl|SIZZ01000001.1_prot_TBR40294.1_1780	13	459	BAC0109cusC/ylcB	457	11	457	299.3	40.4	5.2e-83
lcl|SIZZ01000001.1_prot_TBR40294.1_1780	17	460	BAC0343silC	461	15	459	294.7	39	1.3e-81
lcl|SIZZ01000001.1_prot_TBR40295.1_1781	1	1028	BAC0563acrD	1037	1	1030	1177.2	61.1	0
lcl|SIZZ01000001.1_prot_TBR40295.1_1781	2	1027	BAC0646mdtB	1040	13	1025	339	28	1.3e-94
lcl|SIZZ01000001.1_prot_TBR40295.1_1781	5	1027	BAC0647mdtC	1026	7	1011	315.5	26.8	1.6e-87
lcl|SIZZ01000001.1_prot_TBR40295.1_1781	13	1042	BAC0130czrA	1051	14	1051	239.6	25.4	1.1e-64
lcl|SIZZ01000001.1_prot_TBR40295.1_1781	23	1026	BAC0119czcA	1063	27	1038	233	25.2	1e-62
lcl|SIZZ01000001.1_prot_TBR40295.1_1781	11	1030	BAC0286nrsA	1054	19	1025	207.2	24.5	6.1e-55
lcl|SIZZ01000001.1_prot_TBR40295.1_1781	11	1035	BAC0203cnrA	1076	12	1072	191.4	23.9	3.5e-50
lcl|SIZZ01000001.1_prot_TBR40295.1_1781	11	1038	BAC0549nccA	1076	12	1073	186.8	23.4	8.5e-49
lcl|SIZZ01000001.1_prot_TBR40295.1_1781	13	1021	BAC0267nczA	1043	14	1032	186.4	24.8	1.1e-48
lcl|SIZZ01000001.1_prot_TBR40295.1_1781	4	1028	BAC0127cznA	1019	8	1015	169.5	23.6	1.4e-43
lcl|SIZZ01000001.1_prot_TBR40295.1_1781	16	1018	BAC0341silA	1048	20	1032	167.5	21.9	5.4e-43
lcl|SIZZ01000001.1_prot_TBR40295.1_1781	16	1018	BAC0107cusA/ybdE	1047	20	1032	162.9	21.2	1.3e-41
lcl|SIZZ01000001.1_prot_TBR40765.1_1782	29	379	BAC0645mdtA	413	56	401	104.4	25	2.1e-24
lcl|SIZZ01000001.1_prot_TBR40766.1_1788	14	456	BAC0374srpC	470	13	465	238.4	33.9	1.1e-64
lcl|SIZZ01000001.1_prot_TBR40766.1_1788	9	455	BAC0109cusC/ylcB	457	10	457	238	35.4	1.4e-64
lcl|SIZZ01000001.1_prot_TBR40766.1_1788	6	456	BAC0343silC	461	6	459	225.7	32.6	7.4e-61
lcl|SIZZ01000001.1_prot_TBR40766.1_1788	59	453	BAC0121czcC	418	44	417	51.2	21.1	2.5e-08
lcl|SIZZ01000001.1_prot_TBR40301.1_1789	3	1023	BAC0563acrD	1037	1	1023	746.5	40.7	2.8e-217
lcl|SIZZ01000001.1_prot_TBR40301.1_1789	4	1023	BAC0646mdtB	1040	13	1019	404.8	28.9	2e-114
lcl|SIZZ01000001.1_prot_TBR40301.1_1789	1	1023	BAC0647mdtC	1026	1	1005	373.2	27.8	6.5e-105
lcl|SIZZ01000001.1_prot_TBR40301.1_1789	25	1056	BAC0119czcA	1063	27	1061	248.1	24.1	3.1e-67
lcl|SIZZ01000001.1_prot_TBR40301.1_1789	19	1023	BAC0130czrA	1051	16	1033	220.3	23.4	7e-59
lcl|SIZZ01000001.1_prot_TBR40301.1_1789	13	1023	BAC0286nrsA	1054	19	1020	214.9	23.2	3e-57
lcl|SIZZ01000001.1_prot_TBR40301.1_1789	6	1023	BAC0127cznA	1019	8	1008	209.1	22	1.6e-55
lcl|SIZZ01000001.1_prot_TBR40301.1_1789	8	1023	BAC0267nczA	1043	2	1032	186.8	24.1	8.6e-49
lcl|SIZZ01000001.1_prot_TBR40301.1_1789	19	1020	BAC0203cnrA	1076	15	1053	184.9	22.5	3.3e-48
lcl|SIZZ01000001.1_prot_TBR40301.1_1789	19	1020	BAC0549nccA	1076	15	1053	176.4	22	1.2e-45
lcl|SIZZ01000001.1_prot_TBR40301.1_1789	18	1023	BAC0341silA	1048	20	1035	176.4	21.5	1.2e-45
lcl|SIZZ01000001.1_prot_TBR40301.1_1789	18	1023	BAC0107cusA/ybdE	1047	20	1035	170.6	21.7	6.4e-44
lcl|SIZZ01000001.1_prot_TBR40302.1_1790	26	391	BAC0645mdtA	413	51	411	138.7	28.7	1e-34
lcl|SIZZ01000001.1_prot_TBR40302.1_1790	56	357	BAC0460zneB/hmxB	385	86	365	57	23.8	3.8e-10
lcl|SIZZ01000001.1_prot_TBR40302.1_1790	37	372	BAC0120czcB	520	194	518	53.5	22.9	4.2e-09
lcl|SIZZ01000001.1_prot_TBR40315.1_1803	546	782	BAC0289nrsS	454	222	445	98.6	32.5	3.5e-22
lcl|SIZZ01000001.1_prot_TBR40315.1_1803	549	782	BAC0198irlS	464	244	460	87	31.5	1.1e-18
lcl|SIZZ01000001.1_prot_TBR40315.1_1803	1093	1205	BAC0467zraR/hydH	441	8	117	82.8	39.8	2e-17
lcl|SIZZ01000001.1_prot_TBR40315.1_1803	546	782	BAC0126czcS	476	234	453	80.5	28.6	1e-16
lcl|SIZZ01000001.1_prot_TBR40315.1_1803	549	782	BAC0720copS	477	258	474	80.5	28.9	1e-16
lcl|SIZZ01000001.1_prot_TBR40315.1_1803	829	975	BAC0125czcR	225	3	156	80.1	33.8	1.3e-16
lcl|SIZZ01000001.1_prot_TBR40315.1_1803	548	789	BAC0348silS	497	263	490	77.8	26.8	6.5e-16
lcl|SIZZ01000001.1_prot_TBR40315.1_1803	548	782	BAC0112cusS	480	262	479	72.8	25.3	2.1e-14
lcl|SIZZ01000001.1_prot_TBR40315.1_1803	553	782	BAC0091corS	491	287	487	70.5	27.7	1e-13
lcl|SIZZ01000001.1_prot_TBR40315.1_1803	549	774	BAC0309pcoS	466	249	454	69.7	27	1.8e-13
lcl|SIZZ01000001.1_prot_TBR40315.1_1803	829	975	BAC0197irlR	229	3	156	69.3	31.8	2.3e-13
lcl|SIZZ01000001.1_prot_TBR40315.1_1803	1092	1211	BAC0083copR	227	2	118	68.2	35.5	5.1e-13
lcl|SIZZ01000001.1_prot_TBR40315.1_1803	1092	1211	BAC0638copR	231	2	118	67	33.9	1.1e-12
lcl|SIZZ01000001.1_prot_TBR40315.1_1803	1091	1211	BAC0308pcoR	226	2	119	65.1	31.4	4.3e-12
lcl|SIZZ01000001.1_prot_TBR40315.1_1803	1092	1211	BAC0719copR	230	2	118	63.9	32.5	9.6e-12
lcl|SIZZ01000001.1_prot_TBR40318.1_1806	7	121	BAC0125czcR	225	2	112	72.8	34.5	5.7e-15
lcl|SIZZ01000001.1_prot_TBR40318.1_1806	7	124	BAC0083copR	227	2	116	67.8	33.9	1.8e-13
lcl|SIZZ01000001.1_prot_TBR40318.1_1806	7	130	BAC0197irlR	229	2	121	67.8	35.2	1.8e-13
lcl|SIZZ01000001.1_prot_TBR40318.1_1806	7	124	BAC0753copR	227	2	116	67.8	35.3	1.8e-13
lcl|SIZZ01000001.1_prot_TBR40318.1_1806	7	124	BAC0638copR	231	2	116	62.8	31.4	5.9e-12
lcl|SIZZ01000001.1_prot_TBR40318.1_1806	7	124	BAC0308pcoR	226	3	117	60.5	31.1	2.9e-11
lcl|SIZZ01000001.1_prot_TBR40318.1_1806	7	146	BAC0095crdR	213	4	143	58.5	28.9	1.1e-10
lcl|SIZZ01000001.1_prot_TBR40318.1_1806	7	124	BAC0111cusR/ylcA	227	2	116	58.5	28.8	1.1e-10
lcl|SIZZ01000001.1_prot_TBR40318.1_1806	6	112	BAC0089corR	466	5	107	55.5	33.6	9.3e-10
lcl|SIZZ01000001.1_prot_TBR40318.1_1806	7	164	BAC0022aioR/aoxR	442	7	176	48.9	27.7	8.8e-08
lcl|SIZZ01000001.1_prot_TBR40318.1_1806	7	124	BAC0487pmrA	222	2	116	48.9	28.8	8.8e-08
lcl|SIZZ01000001.1_prot_TBR40345.1_1834	10	249	BAC0162fbpC	356	11	247	122.9	32.7	3.8e-30
lcl|SIZZ01000001.1_prot_TBR40345.1_1834	23	227	BAC0274nikE	268	25	231	112.1	31.9	6.8e-27
lcl|SIZZ01000001.1_prot_TBR40345.1_1834	11	239	BAC0316pstB	257	11	243	102.1	30.8	7e-24
lcl|SIZZ01000001.1_prot_TBR40345.1_1834	11	226	BAC0607tupC	214	3	207	100.9	31	1.6e-23
lcl|SIZZ01000001.1_prot_TBR40345.1_1834	29	249	BAC0604wtpC	344	19	232	97.8	33	1.3e-22
lcl|SIZZ01000001.1_prot_TBR40345.1_1834	11	262	BAC0400troB	266	11	261	89	32.1	6.2e-20
lcl|SIZZ01000001.1_prot_TBR40345.1_1834	22	235	BAC0611modC	352	7	216	86.3	30.5	4e-19
lcl|SIZZ01000001.1_prot_TBR40345.1_1834	9	252	BAC0465znuC/yebM	251	3	221	86.3	28.6	4e-19
lcl|SIZZ01000001.1_prot_TBR40345.1_1834	43	227	BAC0600modC	253	34	222	84.7	29.8	1.2e-18
lcl|SIZZ01000001.1_prot_TBR40345.1_1834	7	223	BAC0440yfeB	296	9	221	81.3	28	1.3e-17
lcl|SIZZ01000001.1_prot_TBR40345.1_1834	24	222	BAC0432ybtP	600	358	552	78.6	32	8.3e-17
lcl|SIZZ01000001.1_prot_TBR40345.1_1834	11	227	BAC0273nikD	254	5	220	77.8	28.6	1.4e-16
lcl|SIZZ01000001.1_prot_TBR40345.1_1834	11	235	BAC0164fecE	255	3	225	76.3	30.1	4.1e-16
lcl|SIZZ01000001.1_prot_TBR40345.1_1834	28	211	BAC0433ybtQ	600	363	543	71.6	31.4	1e-14
lcl|SIZZ01000001.1_prot_TBR40345.1_1834	22	227	BAC0311pgpA/ltpgpA	1548	646	834	53.1	24.4	3.7e-09
lcl|SIZZ01000001.1_prot_TBR40363.1_1853	29	205	BAC0035arsM	283	74	250	55.1	28.1	5e-09
lcl|SIZZ01000001.1_prot_TBR40364.1_1854	47	235	BAC0274nikE	268	22	231	82	28.9	1.3e-17
lcl|SIZZ01000001.1_prot_TBR40364.1_1854	53	269	BAC0604wtpC	344	16	252	72.4	23.6	1.1e-14
lcl|SIZZ01000001.1_prot_TBR40364.1_1854	53	248	BAC0400troB	266	26	235	70.1	27.1	5.3e-14
lcl|SIZZ01000001.1_prot_TBR40364.1_1854	45	263	BAC0162fbpC	356	19	250	67.4	24.2	3.4e-13
lcl|SIZZ01000001.1_prot_TBR40364.1_1854	57	234	BAC0607tupC	214	22	207	63.5	23.9	5e-12
lcl|SIZZ01000001.1_prot_TBR40364.1_1854	46	231	BAC0440yfeB	296	20	221	60.1	24.1	5.5e-11
lcl|SIZZ01000001.1_prot_TBR40364.1_1854	53	244	BAC0164fecE	255	18	226	58.5	25.1	1.6e-10
lcl|SIZZ01000001.1_prot_TBR40364.1_1854	53	265	BAC0273nikD	254	19	247	57.4	22.3	3.6e-10
lcl|SIZZ01000001.1_prot_TBR40364.1_1854	46	243	BAC0316pstB	257	19	239	56.2	23	7.9e-10
lcl|SIZZ01000001.1_prot_TBR40364.1_1854	52	220	BAC0432ybtP	600	359	543	55.5	24.2	1.4e-09
lcl|SIZZ01000001.1_prot_TBR40364.1_1854	53	230	BAC0465znuC/yebM	251	20	195	51.6	25.7	2e-08
lcl|SIZZ01000001.1_prot_TBR40364.1_1854	53	98	BAC0311pgpA/ltpgpA	1548	1303	1355	43.1	43.4	6.9e-06
lcl|SIZZ01000001.1_prot_TBR40772.1_1881	43	210	BAC0169fpvA	815	152	304	40.4	22	7e-05
lcl|SIZZ01000001.1_prot_TBR40392.1_1888	12	150	BAC0125czcR	225	3	138	77	36.4	3.4e-16
lcl|SIZZ01000001.1_prot_TBR40392.1_1888	12	128	BAC0638copR	231	3	117	75.5	39.8	9.8e-16
lcl|SIZZ01000001.1_prot_TBR40392.1_1888	10	157	BAC0089corR	466	5	154	73.2	32	4.9e-15
lcl|SIZZ01000001.1_prot_TBR40392.1_1888	12	128	BAC0083copR	227	3	117	71.6	37.3	1.4e-14
lcl|SIZZ01000001.1_prot_TBR40392.1_1888	12	128	BAC0753copR	227	3	117	67	36.4	3.5e-13
lcl|SIZZ01000001.1_prot_TBR40392.1_1888	12	152	BAC0197irlR	229	3	140	66.6	34.5	4.6e-13
lcl|SIZZ01000001.1_prot_TBR40392.1_1888	12	149	BAC0111cusR/ylcA	227	3	144	62.8	33.8	6.6e-12
lcl|SIZZ01000001.1_prot_TBR40392.1_1888	12	128	BAC0308pcoR	226	5	118	60.5	32.5	3.3e-11
lcl|SIZZ01000001.1_prot_TBR40392.1_1888	12	152	BAC0719copR	230	4	142	57.8	31.7	2.1e-10
lcl|SIZZ01000001.1_prot_TBR40392.1_1888	12	115	BAC0467zraR/hydH	441	8	109	52	34.3	1.2e-08
lcl|SIZZ01000001.1_prot_TBR40392.1_1888	13	130	BAC0022aioR/aoxR	442	10	125	51.2	30.3	2e-08
lcl|SIZZ01000001.1_prot_TBR40393.1_1889	704	943	BAC0468zraS/hydG	465	227	450	87	27.7	1.2e-18
lcl|SIZZ01000001.1_prot_TBR40393.1_1889	687	947	BAC0289nrsS	454	180	444	85.9	26.4	2.7e-18
lcl|SIZZ01000001.1_prot_TBR40393.1_1889	708	943	BAC0112cusS	480	246	474	83.2	28.1	1.7e-17
lcl|SIZZ01000001.1_prot_TBR40393.1_1889	725	947	BAC0637copS	462	239	454	77.8	27	7.3e-16
lcl|SIZZ01000001.1_prot_TBR40393.1_1889	718	935	BAC0348silS	497	257	472	77.4	24.7	9.6e-16
lcl|SIZZ01000001.1_prot_TBR40393.1_1889	702	943	BAC0198irlS	464	221	455	77	26.4	1.3e-15
lcl|SIZZ01000001.1_prot_TBR40393.1_1889	679	943	BAC0091corS	491	240	482	76.6	26.8	1.6e-15
lcl|SIZZ01000001.1_prot_TBR40393.1_1889	718	949	BAC0309pcoS	466	242	463	71.2	26.5	6.9e-14
lcl|SIZZ01000001.1_prot_TBR40393.1_1889	699	937	BAC0488pmrB	364	119	343	69.3	26.4	2.6e-13
lcl|SIZZ01000001.1_prot_TBR40393.1_1889	718	936	BAC0720copS	477	251	463	67.4	23.6	9.9e-13
lcl|SIZZ01000001.1_prot_TBR40393.1_1889	1120	1237	BAC0095crdR	213	3	118	63.2	33.1	1.9e-11
lcl|SIZZ01000001.1_prot_TBR40393.1_1889	701	929	BAC0126czcS	476	213	434	59.3	23.7	2.7e-10
lcl|SIZZ01000001.1_prot_TBR40393.1_1889	1121	1261	BAC0111cusR/ylcA	227	2	139	51.2	24.1	7.3e-08
lcl|SIZZ01000001.1_prot_TBR40393.1_1889	971	1101	BAC0467zraR/hydH	441	8	135	47.8	31.4	8.1e-07
lcl|SIZZ01000001.1_prot_TBR40397.1_1893	49	231	BAC0035arsM	283	72	229	49.3	29.8	5e-08
lcl|SIZZ01000001.1_prot_TBR40429.1_1928	79	211	BAC0619copA	564	46	179	57.8	30.2	2.9e-10
lcl|SIZZ01000001.1_prot_TBR40429.1_1928	99	241	BAC0303pcoA	605	67	202	52.4	26.2	1.2e-08
lcl|SIZZ01000001.1_prot_TBR40429.1_1928	86	211	BAC0077copA	609	53	180	51.6	29.3	2.1e-08
lcl|SIZZ01000001.1_prot_TBR40429.1_1928	103	211	BAC0723copA	641	79	191	48.9	27	1.3e-07
lcl|SIZZ01000001.1_prot_TBR40472.1_1973	177	468	BAC0488pmrB	364	55	354	87	26.5	4.1e-19
lcl|SIZZ01000001.1_prot_TBR40472.1_1973	192	469	BAC0112cusS	480	194	479	78.2	24.9	1.9e-16
lcl|SIZZ01000001.1_prot_TBR40472.1_1973	179	469	BAC0720copS	477	176	474	70.5	26.8	4e-14
lcl|SIZZ01000001.1_prot_TBR40472.1_1973	189	469	BAC0348silS	497	188	484	64.3	23.9	2.9e-12
lcl|SIZZ01000001.1_prot_TBR40472.1_1973	187	451	BAC0637copS	462	163	439	62	27.5	1.4e-11
lcl|SIZZ01000001.1_prot_TBR40472.1_1973	151	455	BAC0309pcoS	466	139	452	49.7	21.3	7.3e-08
lcl|SIZZ01000001.1_prot_TBR40472.1_1973	252	469	BAC0468zraS/hydG	465	239	455	48.1	23.6	2.1e-07
lcl|SIZZ01000001.1_prot_TBR40472.1_1973	187	427	BAC0537copS	487	161	408	43.9	21	4e-06
lcl|SIZZ01000001.1_prot_TBR40473.1_1974	1	223	BAC0719copR	230	1	224	178.7	42	5.1e-47
lcl|SIZZ01000001.1_prot_TBR40473.1_1974	1	226	BAC0753copR	227	1	227	176.4	41	2.5e-46
lcl|SIZZ01000001.1_prot_TBR40473.1_1974	1	223	BAC0111cusR/ylcA	227	1	224	170.6	39.7	1.4e-44
lcl|SIZZ01000001.1_prot_TBR40473.1_1974	2	218	BAC0308pcoR	226	3	219	168.7	39.2	5.3e-44
lcl|SIZZ01000001.1_prot_TBR40473.1_1974	1	230	BAC0083copR	227	1	226	166.8	39.4	2e-43
lcl|SIZZ01000001.1_prot_TBR40473.1_1974	1	223	BAC0347silR	228	1	226	160.6	38.9	1.4e-41
lcl|SIZZ01000001.1_prot_TBR40473.1_1974	1	230	BAC0638copR	231	1	231	160.2	36.8	1.9e-41
lcl|SIZZ01000001.1_prot_TBR40473.1_1974	1	218	BAC0125czcR	225	1	217	159.1	39	4.2e-41
lcl|SIZZ01000001.1_prot_TBR40473.1_1974	1	227	BAC0197irlR	229	1	226	154.8	37.9	7.9e-40
lcl|SIZZ01000001.1_prot_TBR40473.1_1974	1	222	BAC0288nrsR	234	1	232	150.2	37.5	1.9e-38
lcl|SIZZ01000001.1_prot_TBR40473.1_1974	1	218	BAC0487pmrA	222	1	214	149.1	41.3	4.3e-38
lcl|SIZZ01000001.1_prot_TBR40473.1_1974	2	220	BAC0095crdR	213	4	210	81.3	29	1.1e-17
lcl|SIZZ01000001.1_prot_TBR40473.1_1974	3	118	BAC0089corR	466	7	121	72	31	6.7e-15
lcl|SIZZ01000001.1_prot_TBR40473.1_1974	3	112	BAC0467zraR/hydH	441	8	117	72	35.5	6.7e-15
lcl|SIZZ01000001.1_prot_TBR40473.1_1974	2	117	BAC0022aioR/aoxR	442	7	123	60.1	28.8	2.6e-11
lcl|SIZZ01000001.1_prot_TBR40481.1_1984	263	307	BAC0289nrsS	454	344	388	41.2	31.1	2e-05
lcl|SIZZ01000001.1_prot_TBR40780.1_1985	2	123	BAC0089corR	466	6	128	52.4	30.7	6.1e-09
lcl|SIZZ01000001.1_prot_TBR40780.1_1985	30	128	BAC0467zraR/hydH	441	32	138	45.8	30.8	5.7e-07
lcl|SIZZ01000001.1_prot_TBR40780.1_1985	33	112	BAC0095crdR	213	32	117	39.7	31.4	4.1e-05
lcl|SIZZ01000001.1_prot_TBR40491.1_1996	721	951	BAC0289nrsS	454	222	447	97.1	29.2	1.1e-21
lcl|SIZZ01000001.1_prot_TBR40491.1_1996	689	957	BAC0468zraS/hydG	465	214	463	82	26.7	3.7e-17
lcl|SIZZ01000001.1_prot_TBR40491.1_1996	1076	1213	BAC0125czcR	225	2	135	76.3	32.4	2e-15
lcl|SIZZ01000001.1_prot_TBR40491.1_1996	707	949	BAC0720copS	477	245	474	69.7	26.2	1.9e-13
lcl|SIZZ01000001.1_prot_TBR40491.1_1996	714	935	BAC0309pcoS	466	239	453	65.1	25.6	4.7e-12
lcl|SIZZ01000001.1_prot_TBR40491.1_1996	1076	1251	BAC0638copR	231	2	166	62.4	27.8	3.1e-11
lcl|SIZZ01000001.1_prot_TBR40491.1_1996	724	941	BAC0198irlS	464	244	454	60.8	23.3	8.9e-11
lcl|SIZZ01000001.1_prot_TBR40491.1_1996	1076	1217	BAC0083copR	227	2	139	59.7	27.5	2e-10
lcl|SIZZ01000001.1_prot_TBR40491.1_1996	700	969	BAC0126czcS	476	213	463	58.5	22.7	4.4e-10
lcl|SIZZ01000001.1_prot_TBR40491.1_1996	724	910	BAC0537copS	487	237	414	56.2	26.1	2.2e-09
lcl|SIZZ01000001.1_prot_TBR40491.1_1996	723	934	BAC0348silS	497	263	472	53.9	22	1.1e-08
lcl|SIZZ01000001.1_prot_TBR40491.1_1996	1076	1190	BAC0288nrsR	234	2	114	53.1	32.5	1.9e-08
lcl|SIZZ01000001.1_prot_TBR40491.1_1996	698	935	BAC0488pmrB	364	119	342	47	21.2	1.3e-06
lcl|SIZZ01000001.1_prot_TBR40491.1_1996	1077	1246	BAC0089corR	466	7	171	45.4	24.7	3.9e-06
lcl|SIZZ01000001.1_prot_TBR40519.1_2026	5	165	BAC0089corR	466	8	181	70.9	30.9	1.7e-14
lcl|SIZZ01000001.1_prot_TBR40519.1_2026	2	169	BAC0467zraR/hydH	441	5	170	63.2	27.6	3.5e-12
lcl|SIZZ01000001.1_prot_TBR40519.1_2026	5	116	BAC0125czcR	225	4	113	51.6	32.5	1e-08
lcl|SIZZ01000001.1_prot_TBR40519.1_2026	6	116	BAC0095crdR	213	7	117	46.2	30.7	4.4e-07
lcl|SIZZ01000001.1_prot_TBR40525.1_2035	1	128	BAC0586arsC	131	1	131	86.7	36.4	1.5e-19
lcl|SIZZ01000001.1_prot_TBR40525.1_2035	2	121	BAC0581arsC	139	4	132	77	38.2	1.2e-16
lcl|SIZZ01000001.1_prot_TBR40620.1_2134	13	313	sp|P0A5B9|DNAK_MYCTU	625	5	331	61.2	23	1.8e-11
lcl|SIZZ01000002.1_prot_TBR36523.1_2230	181	247	BAC0395trgB	361	224	288	37	35.8	0.00035
lcl|SIZZ01000002.1_prot_TBR36527.1_2234	1	149	BAC0048bfrA	159	1	149	135.2	46.3	4.4e-34
lcl|SIZZ01000002.1_prot_TBR36587.1_2299	56	164	BAC0035arsM	283	71	178	60.1	33.9	2.9e-11
lcl|SIZZ01000002.1_prot_TBR36603.1_2316	35	222	BAC0611modC	352	26	213	86.7	31.2	2.8e-19
lcl|SIZZ01000002.1_prot_TBR36603.1_2316	6	216	BAC0162fbpC	356	10	224	86.3	32.9	3.7e-19
lcl|SIZZ01000002.1_prot_TBR36603.1_2316	26	222	BAC0604wtpC	344	19	215	85.9	30.2	4.8e-19
lcl|SIZZ01000002.1_prot_TBR36603.1_2316	8	216	BAC0607tupC	214	3	207	84.3	27.1	1.4e-18
lcl|SIZZ01000002.1_prot_TBR36603.1_2316	5	240	BAC0440yfeB	296	8	248	81.6	28.8	9.1e-18
lcl|SIZZ01000002.1_prot_TBR36603.1_2316	19	214	BAC0600modC	253	14	219	73.9	29.7	1.9e-15
lcl|SIZZ01000002.1_prot_TBR36603.1_2316	22	230	BAC0432ybtP	600	359	565	70.1	31.6	2.7e-14
lcl|SIZZ01000002.1_prot_TBR36603.1_2316	7	212	BAC0465znuC/yebM	251	4	195	70.1	32.2	2.7e-14
lcl|SIZZ01000002.1_prot_TBR36603.1_2316	22	220	BAC0433ybtQ	600	360	561	68.6	28.8	8e-14
lcl|SIZZ01000002.1_prot_TBR36603.1_2316	23	216	BAC0274nikE	268	28	230	64.3	28.6	1.5e-12
lcl|SIZZ01000002.1_prot_TBR36603.1_2316	17	222	BAC0273nikD	254	13	225	62	28.2	7.5e-12
lcl|SIZZ01000002.1_prot_TBR36603.1_2316	8	212	BAC0400troB	266	11	217	61.6	25.6	9.8e-12
lcl|SIZZ01000002.1_prot_TBR36603.1_2316	23	233	BAC0311pgpA/ltpgpA	1548	650	850	54.3	23.7	1.6e-09
lcl|SIZZ01000002.1_prot_TBR36603.1_2316	22	216	BAC0316pstB	257	25	230	54.3	25	1.6e-09
lcl|SIZZ01000002.1_prot_TBR36617.1_2332	8	226	BAC0719copR	230	3	219	145.6	36.4	4.9e-37
lcl|SIZZ01000002.1_prot_TBR36617.1_2332	8	226	BAC0083copR	227	3	219	142.1	36.4	5.4e-36
lcl|SIZZ01000002.1_prot_TBR36617.1_2332	8	226	BAC0111cusR/ylcA	227	3	219	138.3	34.5	7.8e-35
lcl|SIZZ01000002.1_prot_TBR36617.1_2332	8	230	BAC0125czcR	225	3	221	138.3	33.2	7.8e-35
lcl|SIZZ01000002.1_prot_TBR36617.1_2332	8	226	BAC0308pcoR	226	4	219	136.7	34.1	2.3e-34
lcl|SIZZ01000002.1_prot_TBR36617.1_2332	8	226	BAC0197irlR	229	3	217	132.5	34.7	4.3e-33
lcl|SIZZ01000002.1_prot_TBR36617.1_2332	8	231	BAC0487pmrA	222	3	219	132.5	35.6	4.3e-33
lcl|SIZZ01000002.1_prot_TBR36617.1_2332	8	226	BAC0753copR	227	3	219	131	34.1	1.2e-32
lcl|SIZZ01000002.1_prot_TBR36617.1_2332	8	226	BAC0638copR	231	3	219	129	34.1	4.7e-32
lcl|SIZZ01000002.1_prot_TBR36617.1_2332	8	226	BAC0347silR	228	3	221	115.2	33.2	7e-28
lcl|SIZZ01000002.1_prot_TBR36617.1_2332	8	228	BAC0288nrsR	234	3	230	94	29.6	1.7e-21
lcl|SIZZ01000002.1_prot_TBR36617.1_2332	8	230	BAC0095crdR	213	5	212	74.7	24.4	1.1e-15
lcl|SIZZ01000002.1_prot_TBR36617.1_2332	1	124	BAC0467zraR/hydH	441	1	126	67	32.5	2.2e-13
lcl|SIZZ01000002.1_prot_TBR36617.1_2332	6	111	BAC0089corR	466	5	110	63.5	34.6	2.4e-12
lcl|SIZZ01000002.1_prot_TBR36617.1_2332	1	148	BAC0022aioR/aoxR	442	1	143	61.2	29.3	1.2e-11
lcl|SIZZ01000002.1_prot_TBR36618.1_2333	665	880	BAC0126czcS	476	241	454	96.7	35.3	9.8e-22
lcl|SIZZ01000002.1_prot_TBR36618.1_2333	603	861	BAC0198irlS	464	175	442	92	27.8	2.4e-20
lcl|SIZZ01000002.1_prot_TBR36618.1_2333	663	880	BAC0468zraS/hydG	465	248	456	91.7	27.9	3.2e-20
lcl|SIZZ01000002.1_prot_TBR36618.1_2333	665	879	BAC0112cusS	480	267	479	91.3	26.4	4.1e-20
lcl|SIZZ01000002.1_prot_TBR36618.1_2333	665	884	BAC0289nrsS	454	229	450	84.3	27.4	5.1e-18
lcl|SIZZ01000002.1_prot_TBR36618.1_2333	577	879	BAC0720copS	477	171	474	84	26.4	6.6e-18
lcl|SIZZ01000002.1_prot_TBR36618.1_2333	617	864	BAC0309pcoS	466	216	450	77.8	27.3	4.7e-16
lcl|SIZZ01000002.1_prot_TBR36618.1_2333	623	879	BAC0348silS	497	209	484	73.9	25.3	6.8e-15
lcl|SIZZ01000002.1_prot_TBR36618.1_2333	635	862	BAC0752copS	445	218	445	69.7	25.4	1.3e-13
lcl|SIZZ01000002.1_prot_TBR36618.1_2333	385	881	BAC0091corS	491	16	491	65.1	23	3.2e-12
lcl|SIZZ01000002.1_prot_TBR36618.1_2333	655	881	BAC0488pmrB	364	139	357	53.1	23.2	1.2e-08
lcl|SIZZ01000002.1_prot_TBR36622.1_2337	54	574	BAC0078copA	802	249	746	183.7	29	4.8e-48
lcl|SIZZ01000002.1_prot_TBR36622.1_2337	89	579	BAC0101ctpV	770	242	713	183.3	30.6	6.2e-48
lcl|SIZZ01000002.1_prot_TBR36622.1_2337	42	646	BAC0622copA	804	170	735	178.3	28.4	2e-46
lcl|SIZZ01000002.1_prot_TBR36622.1_2337	78	634	BAC0012actP	827	288	819	176.4	28.6	7.6e-46
lcl|SIZZ01000002.1_prot_TBR36622.1_2337	78	634	BAC0183golT	762	213	744	176	30.5	9.9e-46
lcl|SIZZ01000002.1_prot_TBR36622.1_2337	87	634	BAC0346silP	824	288	815	174.9	29.4	2.2e-45
lcl|SIZZ01000002.1_prot_TBR36622.1_2337	17	575	BAC0629copB	690	112	632	168.7	27.2	1.6e-43
lcl|SIZZ01000002.1_prot_TBR36622.1_2337	123	574	BAC0461zntA/yhhO	732	250	676	168.3	29.3	2.1e-43
lcl|SIZZ01000002.1_prot_TBR36622.1_2337	126	575	BAC0092corT/coaT	642	155	588	158.7	29.9	1.6e-40
lcl|SIZZ01000002.1_prot_TBR36622.1_2337	78	575	BAC0102cueA	797	260	734	147.5	29	3.8e-37
lcl|SIZZ01000002.1_prot_TBR36622.1_2337	123	613	BAC0725copA	834	336	803	146.4	27.6	8.4e-37
lcl|SIZZ01000002.1_prot_TBR36622.1_2337	92	577	BAC0620copA	727	203	672	146	26.5	1.1e-36
lcl|SIZZ01000002.1_prot_TBR36622.1_2337	34	633	BAC0624copA	732	150	712	143.3	25.2	7.1e-36
lcl|SIZZ01000002.1_prot_TBR36622.1_2337	117	592	BAC0099ctpD	647	148	606	143.3	27.1	7.1e-36
lcl|SIZZ01000002.1_prot_TBR36622.1_2337	42	634	BAC0568actP	841	264	834	142.5	25.8	1.2e-35
lcl|SIZZ01000002.1_prot_TBR36625.1_2340	4	370	BAC0063chrA	416	23	395	115.5	26.8	9.1e-28
lcl|SIZZ01000002.1_prot_TBR36625.1_2340	16	367	BAC0152srpC	393	23	369	112.1	28.1	1e-26
lcl|SIZZ01000002.1_prot_TBR36625.1_2340	2	337	BAC0026chrA	458	15	397	89.4	25.9	7e-20
lcl|SIZZ01000002.1_prot_TBR36647.1_2364	22	314	BAC0604wtpC	344	18	305	193.7	38.3	2.4e-51
lcl|SIZZ01000002.1_prot_TBR36647.1_2364	22	236	BAC0162fbpC	356	29	247	162.9	41.1	4.5e-42
lcl|SIZZ01000002.1_prot_TBR36647.1_2364	1	211	BAC0600modC	253	1	219	127.5	38.1	2.1e-31
lcl|SIZZ01000002.1_prot_TBR36647.1_2364	3	217	BAC0607tupC	214	2	211	120.2	34.4	3.4e-29
lcl|SIZZ01000002.1_prot_TBR36647.1_2364	32	214	BAC0611modC	352	26	208	119	36	7.5e-29
lcl|SIZZ01000002.1_prot_TBR36647.1_2364	22	213	BAC0274nikE	268	30	230	107.8	37.3	1.7e-25
lcl|SIZZ01000002.1_prot_TBR36647.1_2364	2	227	BAC0316pstB	257	9	244	98.6	30.4	1e-22
lcl|SIZZ01000002.1_prot_TBR36647.1_2364	22	219	BAC0164fecE	255	20	222	97.1	32.4	3e-22
lcl|SIZZ01000002.1_prot_TBR36647.1_2364	6	213	BAC0440yfeB	296	13	224	81.6	28	1.3e-17
lcl|SIZZ01000002.1_prot_TBR36647.1_2364	20	244	BAC0465znuC/yebM	251	20	229	81.3	26.1	1.7e-17
lcl|SIZZ01000002.1_prot_TBR36647.1_2364	2	216	BAC0432ybtP	600	340	559	80.9	26.8	2.3e-17
lcl|SIZZ01000002.1_prot_TBR36647.1_2364	4	215	BAC0400troB	266	11	223	79.7	29.7	5e-17
lcl|SIZZ01000002.1_prot_TBR36647.1_2364	22	278	BAC0311pgpA/ltpgpA	1548	652	890	75.9	31.9	7.3e-16
lcl|SIZZ01000002.1_prot_TBR36647.1_2364	4	215	BAC0433ybtQ	600	344	560	75.9	28	7.3e-16
lcl|SIZZ01000002.1_prot_TBR36647.1_2364	20	226	BAC0273nikD	254	19	232	60.5	27.9	3.2e-11
lcl|SIZZ01000002.1_prot_TBR36648.1_2365	52	170	BAC0169fpvA	815	165	273	54.7	30.3	3.7e-09
lcl|SIZZ01000002.1_prot_TBR37290.1_2368	48	342	BAC0163fecD	318	37	318	174.5	41.2	1.5e-45
lcl|SIZZ01000002.1_prot_TBR36651.1_2369	17	255	BAC0164fecE	255	3	237	154.8	39	9.3e-40
lcl|SIZZ01000002.1_prot_TBR36651.1_2369	16	231	BAC0440yfeB	296	10	221	95.1	31.1	8.8e-22
lcl|SIZZ01000002.1_prot_TBR36651.1_2369	17	250	BAC0465znuC/yebM	251	5	215	93.6	30.5	2.6e-21
lcl|SIZZ01000002.1_prot_TBR36651.1_2369	17	240	BAC0162fbpC	356	12	230	91.3	31.7	1.3e-20
lcl|SIZZ01000002.1_prot_TBR36651.1_2369	19	266	BAC0400troB	266	13	252	87.8	29.9	1.4e-19
lcl|SIZZ01000002.1_prot_TBR36651.1_2369	31	257	BAC0273nikD	254	18	252	80.1	28.5	2.9e-17
lcl|SIZZ01000002.1_prot_TBR36651.1_2369	32	238	BAC0604wtpC	344	16	213	78.2	29.7	1.1e-16
lcl|SIZZ01000002.1_prot_TBR36651.1_2369	32	244	BAC0432ybtP	600	360	566	75.1	30.7	9.4e-16
lcl|SIZZ01000002.1_prot_TBR36651.1_2369	17	235	BAC0274nikE	268	4	231	72.4	27.9	6.1e-15
lcl|SIZZ01000002.1_prot_TBR36651.1_2369	16	234	BAC0607tupC	214	2	207	69.7	29.7	3.9e-14
lcl|SIZZ01000002.1_prot_TBR36651.1_2369	44	239	BAC0611modC	352	26	212	67	31.3	2.6e-13
lcl|SIZZ01000002.1_prot_TBR36651.1_2369	27	244	BAC0433ybtQ	600	356	567	64.7	26.6	1.3e-12
lcl|SIZZ01000002.1_prot_TBR36651.1_2369	43	235	BAC0600modC	253	28	222	58.2	27.2	1.2e-10
lcl|SIZZ01000002.1_prot_TBR36651.1_2369	14	240	BAC0311pgpA/ltpgpA	1548	1283	1505	51.6	23.6	1.1e-08
lcl|SIZZ01000002.1_prot_TBR36651.1_2369	16	235	BAC0316pstB	257	10	231	51.6	27	1.1e-08
lcl|SIZZ01000002.1_prot_TBR36659.1_2379	37	203	BAC0169fpvA	815	109	284	48.5	25.8	2.9e-07
lcl|SIZZ01000002.1_prot_TBR36674.1_2395	35	885	BAC0087mgtA	898	51	896	919.5	56.3	2e-269
lcl|SIZZ01000002.1_prot_TBR36674.1_2395	30	885	BAC0642mgtA	902	50	900	907.1	55.5	1e-265
lcl|SIZZ01000002.1_prot_TBR36674.1_2395	109	684	BAC0078copA	802	267	752	148.3	25.1	2.9e-37
lcl|SIZZ01000002.1_prot_TBR36674.1_2395	109	684	BAC0012actP	827	283	768	142.9	27.3	1.2e-35
lcl|SIZZ01000002.1_prot_TBR36674.1_2395	111	684	BAC0346silP	824	276	764	139.8	25	1e-34
lcl|SIZZ01000002.1_prot_TBR36674.1_2395	111	684	BAC0183golT	762	207	693	138.7	25.8	2.3e-34
lcl|SIZZ01000002.1_prot_TBR36674.1_2395	115	733	BAC0568actP	841	296	829	124	25.4	5.8e-30
lcl|SIZZ01000002.1_prot_TBR36674.1_2395	91	733	BAC0101ctpV	770	217	753	120.6	24.8	6.4e-29
lcl|SIZZ01000002.1_prot_TBR36674.1_2395	86	706	BAC0092corT/coaT	642	83	611	114.8	23.9	3.5e-27
lcl|SIZZ01000002.1_prot_TBR36674.1_2395	74	688	BAC0461zntA/yhhO	732	168	686	114.8	23.8	3.5e-27
lcl|SIZZ01000002.1_prot_TBR36674.1_2395	160	696	BAC0383tcrB	710	227	665	111.3	24.4	3.9e-26
lcl|SIZZ01000002.1_prot_TBR36674.1_2395	110	709	BAC0629copB	690	157	659	102.8	24.7	1.4e-23
lcl|SIZZ01000002.1_prot_TBR36674.1_2395	150	667	BAC0098ctpC	718	223	648	100.9	23.7	5.2e-23
lcl|SIZZ01000002.1_prot_TBR36674.1_2395	104	680	BAC0298pbrA	799	251	746	99.4	24.4	1.5e-22
lcl|SIZZ01000002.1_prot_TBR36674.1_2395	527	684	BAC0620copA	727	541	675	97.4	36.1	5.8e-22
lcl|SIZZ01000002.1_prot_TBR36691.1_2418	30	567	BAC0169fpvA	815	149	693	44.7	23.1	3.5e-06
lcl|SIZZ01000002.1_prot_TBR36697.1_2425	30	307	BAC0314pmrA	399	23	296	84	27.7	3.3e-18
lcl|SIZZ01000002.1_prot_TBR36697.1_2425	8	400	BAC0443yfmO	396	14	385	51.6	23.1	1.8e-08
lcl|SIZZ01000002.1_prot_TBR36748.1_2481	29	724	BAC0168fptA	720	29	693	48.1	20.8	3.4e-07
lcl|SIZZ01000002.1_prot_TBR36750.1_2483	307	747	BAC0570actP	551	34	480	44.3	21.2	5.2e-06
lcl|SIZZ01000002.1_prot_TBR36770.1_2506	4	106	BAC0113cutA	112	10	112	86.7	38.8	1.2e-19
lcl|SIZZ01000002.1_prot_TBR36780.1_2517	6	399	BAC0293ruvB	397	3	397	446	56.2	5.7e-127
lcl|SIZZ01000002.1_prot_TBR36785.1_2522	38	395	BAC0285nreB	416	34	400	215.3	39.3	9e-58
lcl|SIZZ01000002.1_prot_TBR36803.1_2543	137	593	BAC0224merA	631	173	626	211.1	30.2	2.4e-56
lcl|SIZZ01000002.1_prot_TBR36803.1_2543	131	593	BAC0651merA	547	83	542	210.3	29.3	4.1e-56
lcl|SIZZ01000002.1_prot_TBR36803.1_2543	136	593	BAC0649merA	568	104	563	194.1	28.1	3.1e-51
lcl|SIZZ01000002.1_prot_TBR36803.1_2543	135	593	BAC0652merA	561	100	556	184.5	28	2.4e-48
lcl|SIZZ01000002.1_prot_TBR36803.1_2543	136	593	BAC0653merA	562	102	557	184.5	29.3	2.4e-48
lcl|SIZZ01000002.1_prot_TBR36803.1_2543	136	593	BAC0650merA	569	109	564	177.6	29	3e-46
lcl|SIZZ01000002.1_prot_TBR36803.1_2543	123	593	BAC0648merA	460	88	455	103.2	22.8	7.1e-24
lcl|SIZZ01000002.1_prot_TBR36816.1_2557	5	225	BAC0487pmrA	222	3	214	102.8	32.1	3.5e-24
lcl|SIZZ01000002.1_prot_TBR36816.1_2557	5	225	BAC0083copR	227	3	219	99.8	30.8	3e-23
lcl|SIZZ01000002.1_prot_TBR36816.1_2557	5	225	BAC0753copR	227	3	219	99.8	31.7	3e-23
lcl|SIZZ01000002.1_prot_TBR36816.1_2557	5	225	BAC0197irlR	229	3	217	92.4	32.5	4.8e-21
lcl|SIZZ01000002.1_prot_TBR36816.1_2557	5	225	BAC0638copR	231	3	219	92	29	6.3e-21
lcl|SIZZ01000002.1_prot_TBR36816.1_2557	5	225	BAC0719copR	230	3	219	90.5	33.8	1.8e-20
lcl|SIZZ01000002.1_prot_TBR36816.1_2557	5	225	BAC0308pcoR	226	4	219	87.8	30.1	1.2e-19
lcl|SIZZ01000002.1_prot_TBR36816.1_2557	5	225	BAC0111cusR/ylcA	227	3	219	85.5	30.9	5.9e-19
lcl|SIZZ01000002.1_prot_TBR36816.1_2557	5	225	BAC0347silR	228	3	221	78.2	29.7	9.3e-17
lcl|SIZZ01000002.1_prot_TBR36816.1_2557	5	225	BAC0125czcR	225	3	217	77.4	28.6	1.6e-16
lcl|SIZZ01000002.1_prot_TBR36816.1_2557	63	227	BAC0288nrsR	234	61	230	68.2	30.5	9.7e-14
lcl|SIZZ01000002.1_prot_TBR36817.1_2558	374	658	BAC0348silS	497	197	481	66.6	21.8	8.2e-13
lcl|SIZZ01000002.1_prot_TBR36870.1_2615	30	258	BAC0604wtpC	344	21	245	120.6	34.7	2e-29
lcl|SIZZ01000002.1_prot_TBR36870.1_2615	11	238	BAC0162fbpC	356	8	233	110.5	30.5	2.1e-26
lcl|SIZZ01000002.1_prot_TBR36870.1_2615	15	229	BAC0607tupC	214	3	207	105.9	31.5	5.1e-25
lcl|SIZZ01000002.1_prot_TBR36870.1_2615	15	233	BAC0400troB	266	11	224	96.3	33.9	4e-22
lcl|SIZZ01000002.1_prot_TBR36870.1_2615	37	233	BAC0611modC	352	21	211	93.2	30.3	3.4e-21
lcl|SIZZ01000002.1_prot_TBR36870.1_2615	33	240	BAC0273nikD	254	22	230	92	30.6	7.6e-21
lcl|SIZZ01000002.1_prot_TBR36870.1_2615	15	230	BAC0316pstB	257	11	231	92	29.6	7.6e-21
lcl|SIZZ01000002.1_prot_TBR36870.1_2615	25	241	BAC0274nikE	268	19	245	88.6	29.5	8.4e-20
lcl|SIZZ01000002.1_prot_TBR36870.1_2615	45	252	BAC0600modC	253	32	243	87.8	30.5	1.4e-19
lcl|SIZZ01000002.1_prot_TBR36870.1_2615	15	242	BAC0164fecE	255	3	229	87.4	29.2	1.9e-19
lcl|SIZZ01000002.1_prot_TBR36870.1_2615	1	237	BAC0440yfeB	296	1	231	84.3	28.7	1.6e-18
lcl|SIZZ01000002.1_prot_TBR36870.1_2615	13	239	BAC0465znuC/yebM	251	3	208	80.1	27.8	3e-17
lcl|SIZZ01000002.1_prot_TBR36870.1_2615	37	247	BAC0432ybtP	600	367	574	68.9	26.6	6.9e-14
lcl|SIZZ01000002.1_prot_TBR36870.1_2615	24	234	BAC0311pgpA/ltpgpA	1548	644	838	68.6	27.6	9e-14
lcl|SIZZ01000002.1_prot_TBR36870.1_2615	33	233	BAC0433ybtQ	600	364	561	62.4	27.7	6.4e-12
lcl|SIZZ01000002.1_prot_TBR36879.1_2624	19	694	BAC0356recG	691	8	682	812.4	62.4	2.8e-237
lcl|SIZZ01000002.1_prot_TBR36879.1_2624	549	694	BAC0357recG	156	2	147	214.5	71.9	2.6e-57
lcl|SIZZ01000002.1_prot_TBR36896.1_2643	26	371	BAC0645mdtA	413	37	389	216.1	39.9	4.7e-58
lcl|SIZZ01000002.1_prot_TBR36896.1_2643	183	363	BAC0131czrB	405	220	392	60.8	26.5	2.5e-11
lcl|SIZZ01000002.1_prot_TBR36897.1_2644	6	1024	BAC0647mdtC	1026	6	1019	872.1	48.3	4.4e-255
lcl|SIZZ01000002.1_prot_TBR36897.1_2644	6	1022	BAC0646mdtB	1040	15	1035	840.1	46.2	1.8e-245
lcl|SIZZ01000002.1_prot_TBR36897.1_2644	8	1015	BAC0563acrD	1037	6	1028	377.9	28.9	2.6e-106
lcl|SIZZ01000002.1_prot_TBR36897.1_2644	5	1010	BAC0130czrA	1051	7	1033	312.4	25.2	1.3e-86
lcl|SIZZ01000002.1_prot_TBR36897.1_2644	8	1010	BAC0119czcA	1063	10	1033	290.4	24.2	5.4e-80
lcl|SIZZ01000002.1_prot_TBR36897.1_2644	21	1010	BAC0286nrsA	1054	27	1020	270.4	23.9	5.8e-74
lcl|SIZZ01000002.1_prot_TBR36897.1_2644	5	1010	BAC0127cznA	1019	7	1008	251.5	23.3	2.8e-68
lcl|SIZZ01000002.1_prot_TBR36897.1_2644	8	1010	BAC0267nczA	1043	10	1032	246.5	24.8	9e-67
lcl|SIZZ01000002.1_prot_TBR36897.1_2644	8	1009	BAC0203cnrA	1076	10	1055	225.3	22.7	2.1e-60
lcl|SIZZ01000002.1_prot_TBR36897.1_2644	13	1022	BAC0549nccA	1076	15	1068	225.3	22.8	2.1e-60
lcl|SIZZ01000002.1_prot_TBR36897.1_2644	5	1010	BAC0341silA	1048	3	1035	209.1	23.3	1.6e-55
lcl|SIZZ01000002.1_prot_TBR36897.1_2644	5	1010	BAC0107cusA/ybdE	1047	3	1035	207.6	23.2	4.6e-55
lcl|SIZZ01000002.1_prot_TBR36901.1_2648	64	408	BAC0645mdtA	413	63	387	70.9	24.3	2.7e-14
lcl|SIZZ01000002.1_prot_TBR37318.1_2649	3	224	BAC0274nikE	268	2	232	110.5	32.3	1.7e-26
lcl|SIZZ01000002.1_prot_TBR37318.1_2649	4	224	BAC0162fbpC	356	11	226	109.8	32	2.9e-26
lcl|SIZZ01000002.1_prot_TBR37318.1_2649	4	203	BAC0604wtpC	344	1	189	104.8	31	9.3e-25
lcl|SIZZ01000002.1_prot_TBR37318.1_2649	5	224	BAC0607tupC	214	3	209	94.7	29.4	9.6e-22
lcl|SIZZ01000002.1_prot_TBR37318.1_2649	27	220	BAC0611modC	352	17	205	90.5	32.3	1.8e-20
lcl|SIZZ01000002.1_prot_TBR37318.1_2649	22	225	BAC0164fecE	255	16	219	88.2	30.1	9e-20
lcl|SIZZ01000002.1_prot_TBR37318.1_2649	5	224	BAC0316pstB	257	11	232	87	34.3	2e-19
lcl|SIZZ01000002.1_prot_TBR37318.1_2649	37	215	BAC0600modC	253	30	213	85.5	33.2	5.8e-19
lcl|SIZZ01000002.1_prot_TBR37318.1_2649	5	227	BAC0400troB	266	11	226	85.1	31.9	7.6e-19
lcl|SIZZ01000002.1_prot_TBR37318.1_2649	5	225	BAC0433ybtQ	600	344	560	84.3	28.6	1.3e-18
lcl|SIZZ01000002.1_prot_TBR37318.1_2649	24	225	BAC0432ybtP	600	360	574	82	29.7	6.4e-18
lcl|SIZZ01000002.1_prot_TBR37318.1_2649	1	204	BAC0465znuC/yebM	251	1	180	74.7	29.5	1e-15
lcl|SIZZ01000002.1_prot_TBR37318.1_2649	23	225	BAC0273nikD	254	18	222	68.9	29.2	5.6e-14
lcl|SIZZ01000002.1_prot_TBR37318.1_2649	24	222	BAC0440yfeB	296	27	224	67.8	25.9	1.3e-13
lcl|SIZZ01000002.1_prot_TBR37318.1_2649	22	223	BAC0311pgpA/ltpgpA	1548	648	834	58.2	27.1	1e-10
lcl|SIZZ01000002.1_prot_TBR36909.1_2658	40	104	BAC0200klaC/telB	317	85	149	57.4	44.6	9.5e-11
lcl|SIZZ01000002.1_prot_TBR37321.1_2674	3	604	BAC0612perO	595	18	591	169.1	26.9	1.1e-43
lcl|SIZZ01000002.1_prot_TBR36931.1_2683	1	224	BAC0719copR	230	1	225	166.8	42.5	2e-43
lcl|SIZZ01000002.1_prot_TBR36931.1_2683	1	224	BAC0125czcR	225	1	222	164.9	41.3	7.6e-43
lcl|SIZZ01000002.1_prot_TBR36931.1_2683	1	218	BAC0197irlR	229	1	217	157.5	39.7	1.2e-40
lcl|SIZZ01000002.1_prot_TBR36931.1_2683	1	224	BAC0111cusR/ylcA	227	1	225	157.1	38.5	1.6e-40
lcl|SIZZ01000002.1_prot_TBR36931.1_2683	1	225	BAC0347silR	228	1	228	151.4	38.9	8.6e-39
lcl|SIZZ01000002.1_prot_TBR36931.1_2683	1	224	BAC0753copR	227	1	225	151	37.6	1.1e-38
lcl|SIZZ01000002.1_prot_TBR36931.1_2683	1	225	BAC0638copR	231	1	226	149.4	38.8	3.3e-38
lcl|SIZZ01000002.1_prot_TBR36931.1_2683	1	224	BAC0083copR	227	1	225	146.7	37.6	2.1e-37
lcl|SIZZ01000002.1_prot_TBR36931.1_2683	2	218	BAC0308pcoR	226	3	219	144.8	36.2	8.1e-37
lcl|SIZZ01000002.1_prot_TBR36931.1_2683	1	222	BAC0487pmrA	222	1	218	128.3	35.3	7.8e-32
lcl|SIZZ01000002.1_prot_TBR36931.1_2683	1	219	BAC0288nrsR	234	1	229	108.6	30.9	6.4e-26
lcl|SIZZ01000002.1_prot_TBR36931.1_2683	2	219	BAC0095crdR	213	4	209	95.9	28.4	4.3e-22
lcl|SIZZ01000002.1_prot_TBR36931.1_2683	3	104	BAC0089corR	466	7	106	60.5	35.3	2e-11
lcl|SIZZ01000002.1_prot_TBR36931.1_2683	3	114	BAC0467zraR/hydH	441	8	118	56.2	29.5	3.8e-10
lcl|SIZZ01000002.1_prot_TBR36932.1_2684	121	401	BAC0198irlS	464	150	437	84.3	25.5	2.4e-18
lcl|SIZZ01000002.1_prot_TBR36932.1_2684	143	404	BAC0637copS	462	167	436	77.4	28.3	3e-16
lcl|SIZZ01000002.1_prot_TBR36932.1_2684	134	422	BAC0488pmrB	364	61	352	76.6	26.7	5e-16
lcl|SIZZ01000002.1_prot_TBR36932.1_2684	132	407	BAC0752copS	445	166	445	72.8	24.8	7.3e-15
lcl|SIZZ01000002.1_prot_TBR36932.1_2684	130	423	BAC0112cusS	480	184	477	71.6	24.8	1.6e-14
lcl|SIZZ01000002.1_prot_TBR36932.1_2684	140	408	BAC0309pcoS	466	178	449	70.5	28.4	3.6e-14
lcl|SIZZ01000002.1_prot_TBR36932.1_2684	142	410	BAC0348silS	497	192	471	69.3	23.4	8.1e-14
lcl|SIZZ01000002.1_prot_TBR36932.1_2684	141	384	BAC0537copS	487	163	410	68.6	25.5	1.4e-13
lcl|SIZZ01000002.1_prot_TBR36932.1_2684	164	407	BAC0720copS	477	207	458	68.2	26.7	1.8e-13
lcl|SIZZ01000002.1_prot_TBR36932.1_2684	212	380	BAC0289nrsS	454	222	398	63.2	29.4	5.8e-12
lcl|SIZZ01000002.1_prot_TBR36941.1_2693	312	489	BAC0465znuC/yebM	251	4	180	92.4	32.8	1.3e-20
lcl|SIZZ01000002.1_prot_TBR36941.1_2693	313	516	BAC0607tupC	214	3	214	86.3	30.3	9.3e-19
lcl|SIZZ01000002.1_prot_TBR36941.1_2693	18	224	BAC0274nikE	268	27	230	77	29	5.7e-16
lcl|SIZZ01000002.1_prot_TBR36941.1_2693	321	489	BAC0164fecE	255	11	197	69.3	28.6	1.2e-13
lcl|SIZZ01000002.1_prot_TBR36941.1_2693	313	523	BAC0400troB	266	11	237	69.3	28.1	1.2e-13
lcl|SIZZ01000002.1_prot_TBR36941.1_2693	18	224	BAC0162fbpC	356	26	224	68.9	27.8	1.5e-13
lcl|SIZZ01000002.1_prot_TBR36941.1_2693	315	497	BAC0440yfeB	296	13	217	68.2	32	2.6e-13
lcl|SIZZ01000002.1_prot_TBR36941.1_2693	2	205	BAC0316pstB	257	9	211	65.9	25.8	1.3e-12
lcl|SIZZ01000002.1_prot_TBR36941.1_2693	22	227	BAC0611modC	352	17	210	65.5	26.2	1.7e-12
lcl|SIZZ01000002.1_prot_TBR36941.1_2693	31	223	BAC0600modC	253	29	220	63.5	28.1	6.5e-12
lcl|SIZZ01000002.1_prot_TBR36941.1_2693	328	467	BAC0604wtpC	344	16	164	60.5	28.5	5.5e-11
lcl|SIZZ01000002.1_prot_TBR36941.1_2693	317	508	BAC0432ybtP	600	350	557	58.2	27.3	2.7e-10
lcl|SIZZ01000002.1_prot_TBR36941.1_2693	18	249	BAC0311pgpA/ltpgpA	1548	649	858	57.8	25.7	3.6e-10
lcl|SIZZ01000002.1_prot_TBR36941.1_2693	19	269	BAC0433ybtQ	600	361	593	57	26.4	6.1e-10
lcl|SIZZ01000002.1_prot_TBR36941.1_2693	4	224	BAC0273nikD	254	5	219	52.8	23	1.1e-08
lcl|SIZZ01000002.1_prot_TBR36944.1_2696	5	466	BAC0343silC	461	8	459	178.7	30.1	1.1e-46
lcl|SIZZ01000002.1_prot_TBR36944.1_2696	9	465	BAC0109cusC/ylcB	457	12	457	156.8	29.7	4.6e-40
lcl|SIZZ01000002.1_prot_TBR36944.1_2696	8	466	BAC0374srpC	470	10	465	149.4	28.3	7.3e-38
lcl|SIZZ01000002.1_prot_TBR36944.1_2696	139	320	BAC0121czcC	418	105	280	49.3	20.9	1e-07
lcl|SIZZ01000002.1_prot_TBR36945.1_2697	53	294	BAC0460zneB/hmxB	385	92	291	40.4	26.2	3.5e-05
lcl|SIZZ01000002.1_prot_TBR36945.1_2697	4	289	BAC0550nccB	397	51	287	38.9	27.1	0.0001
lcl|SIZZ01000002.1_prot_TBR36945.1_2697	54	209	BAC0645mdtA	413	87	238	37.4	22.4	0.00029
lcl|SIZZ01000002.1_prot_TBR36991.1_2746	11	127	BAC0644corD	125	9	125	146	53.8	2e-37
lcl|SIZZ01000002.1_prot_TBR37021.1_2776	341	573	BAC0309pcoS	466	222	453	82	26.7	1.7e-17
lcl|SIZZ01000002.1_prot_TBR37021.1_2776	374	587	BAC0091corS	491	289	489	68.9	26.7	1.5e-13
lcl|SIZZ01000002.1_prot_TBR37021.1_2776	345	585	BAC0348silS	497	241	484	63.9	23.3	4.8e-12
lcl|SIZZ01000002.1_prot_TBR37022.1_2777	55	134	BAC0083copR	227	32	115	49.3	30.2	3e-08
lcl|SIZZ01000002.1_prot_TBR37022.1_2777	64	134	BAC0638copR	231	47	115	48.5	33.8	5.1e-08
lcl|SIZZ01000002.1_prot_TBR37022.1_2777	9	134	BAC0197irlR	229	3	114	48.5	28.6	5.1e-08
lcl|SIZZ01000002.1_prot_TBR37022.1_2777	6	134	BAC0308pcoR	226	1	116	48.1	25.4	6.7e-08
lcl|SIZZ01000002.1_prot_TBR37022.1_2777	64	134	BAC0719copR	230	47	115	44.3	28.2	9.7e-07
lcl|SIZZ01000002.1_prot_TBR37022.1_2777	63	134	BAC0487pmrA	222	46	115	42.4	33.3	3.7e-06
lcl|SIZZ01000002.1_prot_TBR37326.1_2778	127	374	BAC0468zraS/hydG	465	227	462	105.5	30.3	1.2e-24
lcl|SIZZ01000002.1_prot_TBR37326.1_2778	130	367	BAC0091corS	491	267	487	89.4	27.8	9e-20
lcl|SIZZ01000002.1_prot_TBR37326.1_2778	140	368	BAC0289nrsS	454	219	446	82	27.2	1.4e-17
lcl|SIZZ01000002.1_prot_TBR37326.1_2778	4	125	BAC0753copR	227	1	121	45.8	26.8	1.1e-06
lcl|SIZZ01000002.1_prot_TBR37326.1_2778	4	129	BAC0719copR	230	1	129	40.8	26	3.7e-05
lcl|SIZZ01000002.1_prot_TBR37326.1_2778	4	125	BAC0111cusR/ylcA	227	1	121	39.7	25.2	8.2e-05
lcl|SIZZ01000002.1_prot_TBR37326.1_2778	4	169	BAC0467zraR/hydH	441	6	161	38.5	22.3	0.00018
lcl|SIZZ01000002.1_prot_TBR37023.1_2779	6	462	BAC0467zraR/hydH	441	8	441	314.3	39.8	1.6e-87
lcl|SIZZ01000002.1_prot_TBR37023.1_2779	5	465	BAC0089corR	466	6	457	302.8	39.8	4.7e-84
lcl|SIZZ01000002.1_prot_TBR37023.1_2779	6	466	BAC0022aioR/aoxR	442	8	435	226.9	31.8	3.3e-61
lcl|SIZZ01000002.1_prot_TBR37023.1_2779	6	120	BAC0111cusR/ylcA	227	3	117	63.2	31.3	6.3e-12
lcl|SIZZ01000002.1_prot_TBR37023.1_2779	6	120	BAC0347silR	228	3	117	59.3	30.4	9.1e-11
lcl|SIZZ01000002.1_prot_TBR37023.1_2779	6	120	BAC0288nrsR	234	3	119	51.2	31.6	2.5e-08
lcl|SIZZ01000002.1_prot_TBR37024.1_2780	309	533	BAC0091corS	491	272	486	113.2	34.2	6.3e-27
lcl|SIZZ01000002.1_prot_TBR37024.1_2780	309	533	BAC0468zraS/hydG	465	237	454	100.9	32	3.2e-23
lcl|SIZZ01000002.1_prot_TBR37024.1_2780	304	548	BAC0023aioS/aoxS	488	249	488	65.9	26.8	1.2e-12
lcl|SIZZ01000002.1_prot_TBR37024.1_2780	307	540	BAC0488pmrB	364	133	361	49.7	25.2	8.6e-08
lcl|SIZZ01000002.1_prot_TBR37056.1_2817	1	344	BAC0355ruvB	352	1	347	460.7	67.1	1e-131
lcl|SIZZ01000002.1_prot_TBR37064.1_2826	7	216	BAC0490G2alt	221	4	210	105.1	32.6	7.1e-25
lcl|SIZZ01000002.1_prot_TBR37064.1_2826	11	173	BAC0489ALU1-P	187	24	182	93.2	33.5	2.8e-21
lcl|SIZZ01000002.1_prot_TBR37067.1_2829	287	502	BAC0289nrsS	454	224	445	70.5	29.7	4.5e-14
lcl|SIZZ01000002.1_prot_TBR37067.1_2829	281	515	BAC0468zraS/hydG	465	233	465	67	27.8	4.9e-13
lcl|SIZZ01000002.1_prot_TBR37333.1_2834	132	468	BAC0091corS	491	188	491	97.8	26.6	3.1e-22
lcl|SIZZ01000002.1_prot_TBR37333.1_2834	244	471	BAC0289nrsS	454	226	454	92.8	30.3	9.8e-21
lcl|SIZZ01000002.1_prot_TBR37333.1_2834	145	467	BAC0637copS	462	165	455	85.1	23.5	2.1e-18
lcl|SIZZ01000002.1_prot_TBR37333.1_2834	118	441	BAC0198irlS	464	143	437	85.1	24.7	2.1e-18
lcl|SIZZ01000002.1_prot_TBR37333.1_2834	220	464	BAC0112cusS	480	240	479	82.4	27.6	1.3e-17
lcl|SIZZ01000002.1_prot_TBR37333.1_2834	146	466	BAC0720copS	477	185	476	81.3	25.1	3e-17
lcl|SIZZ01000002.1_prot_TBR37333.1_2834	140	441	BAC0752copS	445	165	439	77.8	26.7	3.3e-16
lcl|SIZZ01000002.1_prot_TBR37333.1_2834	147	414	BAC0537copS	487	165	408	77.4	23.7	4.3e-16
lcl|SIZZ01000002.1_prot_TBR37333.1_2834	240	464	BAC0468zraS/hydG	465	243	455	71.2	26.3	3.1e-14
lcl|SIZZ01000002.1_prot_TBR37333.1_2834	49	439	BAC0309pcoS	466	57	440	68.2	22.2	2.6e-13
lcl|SIZZ01000002.1_prot_TBR37333.1_2834	3	451	BAC0348silS	497	7	472	63.9	23.3	4.9e-12
lcl|SIZZ01000002.1_prot_TBR37333.1_2834	119	453	BAC0488pmrB	364	53	343	48.5	23.7	2.1e-07
lcl|SIZZ01000002.1_prot_TBR37335.1_2862	315	364	BAC0078copA	802	312	357	36.2	36	0.0009
lcl|SIZZ01000002.1_prot_TBR37131.1_2898	1	236	BAC0604wtpC	344	1	234	139	36	4.7e-35
lcl|SIZZ01000002.1_prot_TBR37131.1_2898	1	220	BAC0162fbpC	356	11	231	115.2	32.4	7.2e-28
lcl|SIZZ01000002.1_prot_TBR37131.1_2898	2	232	BAC0164fecE	255	3	235	102.4	27.2	4.8e-24
lcl|SIZZ01000002.1_prot_TBR37131.1_2898	2	213	BAC0607tupC	214	3	207	100.9	30	1.4e-23
lcl|SIZZ01000002.1_prot_TBR37131.1_2898	1	220	BAC0465znuC/yebM	251	4	205	98.6	30.8	7e-23
lcl|SIZZ01000002.1_prot_TBR37131.1_2898	17	217	BAC0440yfeB	296	27	227	96.3	30.1	3.5e-22
lcl|SIZZ01000002.1_prot_TBR37131.1_2898	2	235	BAC0400troB	266	11	242	95.9	27.9	4.5e-22
lcl|SIZZ01000002.1_prot_TBR37131.1_2898	30	214	BAC0600modC	253	30	222	92.8	30.1	3.8e-21
lcl|SIZZ01000002.1_prot_TBR37131.1_2898	17	214	BAC0316pstB	257	26	231	88.2	29.4	9.4e-20
lcl|SIZZ01000002.1_prot_TBR37131.1_2898	29	222	BAC0611modC	352	26	216	79.7	29.6	3.4e-17
lcl|SIZZ01000002.1_prot_TBR37131.1_2898	6	214	BAC0274nikE	268	17	231	77	27.8	2.2e-16
lcl|SIZZ01000002.1_prot_TBR37131.1_2898	12	224	BAC0432ybtP	600	355	567	76.6	27.5	2.8e-16
lcl|SIZZ01000002.1_prot_TBR37131.1_2898	32	224	BAC0433ybtQ	600	376	568	65.5	28.7	6.5e-13
lcl|SIZZ01000002.1_prot_TBR37131.1_2898	13	217	BAC0311pgpA/ltpgpA	1548	646	837	63.5	26.5	2.5e-12
lcl|SIZZ01000002.1_prot_TBR37131.1_2898	13	217	BAC0273nikD	254	15	223	59.7	22.5	3.6e-11
lcl|SIZZ01000002.1_prot_TBR37146.1_2914	161	421	BAC0088corC	292	20	274	115.2	29.7	1.3e-27
lcl|SIZZ01000002.1_prot_TBR37146.1_2914	213	428	BAC0643corB	227	2	217	90.1	25.9	4.6e-20
lcl|SIZZ01000002.1_prot_TBR37148.1_2916	3	361	BAC0312pitA	499	15	488	100.5	24.5	2.9e-23
lcl|SIZZ01000002.1_prot_TBR37196.1_2964	7	471	BAC0467zraR/hydH	441	5	441	273.5	38	3.2e-75
lcl|SIZZ01000002.1_prot_TBR37196.1_2964	140	476	BAC0089corR	466	144	459	250	41.9	3.8e-68
lcl|SIZZ01000002.1_prot_TBR37196.1_2964	141	475	BAC0022aioR/aoxR	442	134	435	204.9	38.3	1.4e-54
lcl|SIZZ01000002.1_prot_TBR37213.1_2984	5	130	BAC0111cusR/ylcA	227	1	121	63.9	28.6	1.1e-12
lcl|SIZZ01000002.1_prot_TBR37213.1_2984	5	127	BAC0347silR	228	1	118	63.2	29.3	1.8e-12
lcl|SIZZ01000002.1_prot_TBR37213.1_2984	4	123	BAC0467zraR/hydH	441	5	119	62.4	35	3.1e-12
lcl|SIZZ01000002.1_prot_TBR37213.1_2984	1	112	BAC0089corR	466	1	106	61.2	30.4	7e-12
lcl|SIZZ01000002.1_prot_TBR37213.1_2984	6	134	BAC0308pcoR	226	3	126	58.9	27.9	3.5e-11
lcl|SIZZ01000002.1_prot_TBR37213.1_2984	5	130	BAC0719copR	230	1	121	58.5	30.2	4.5e-11
lcl|SIZZ01000002.1_prot_TBR37213.1_2984	5	121	BAC0125czcR	225	1	111	56.6	27.4	1.7e-10
lcl|SIZZ01000002.1_prot_TBR37213.1_2984	5	127	BAC0753copR	227	1	118	56.2	28.5	2.2e-10
lcl|SIZZ01000002.1_prot_TBR37213.1_2984	5	134	BAC0197irlR	229	1	124	55.1	26.9	5e-10
lcl|SIZZ01000002.1_prot_TBR37213.1_2984	5	127	BAC0638copR	231	1	118	53.9	25.2	1.1e-09
lcl|SIZZ01000002.1_prot_TBR37213.1_2984	6	125	BAC0095crdR	213	4	119	47.4	25.8	1e-07
lcl|SIZZ01000002.1_prot_TBR37213.1_2984	5	127	BAC0487pmrA	222	1	118	44.7	24.4	6.8e-07
lcl|SIZZ01000002.1_prot_TBR37225.1_2996	4	119	BAC0467zraR/hydH	441	8	121	79.3	37.1	2.2e-17
lcl|SIZZ01000002.1_prot_TBR37225.1_2996	3	119	BAC0083copR	227	2	116	71.2	36.8	6e-15
lcl|SIZZ01000002.1_prot_TBR37225.1_2996	3	119	BAC0347silR	228	2	116	68.6	35	3.9e-14
lcl|SIZZ01000002.1_prot_TBR37225.1_2996	3	119	BAC0638copR	231	2	116	67.4	33.3	8.6e-14
lcl|SIZZ01000002.1_prot_TBR37225.1_2996	3	119	BAC0719copR	230	2	116	67	38.5	1.1e-13
lcl|SIZZ01000002.1_prot_TBR37225.1_2996	3	119	BAC0111cusR/ylcA	227	2	116	64.7	35	5.6e-13
lcl|SIZZ01000002.1_prot_TBR37225.1_2996	3	119	BAC0125czcR	225	2	115	64.7	33.3	5.6e-13
lcl|SIZZ01000002.1_prot_TBR37225.1_2996	1	119	BAC0308pcoR	226	1	117	63.5	31.1	1.2e-12
lcl|SIZZ01000002.1_prot_TBR37225.1_2996	3	119	BAC0197irlR	229	2	115	60.8	31.6	8.1e-12
lcl|SIZZ01000002.1_prot_TBR37225.1_2996	4	119	BAC0089corR	466	7	119	58.5	28.4	4e-11
lcl|SIZZ01000002.1_prot_TBR37225.1_2996	3	119	BAC0753copR	227	2	116	55.1	31.6	4.4e-10
lcl|SIZZ01000002.1_prot_TBR37225.1_2996	3	116	BAC0288nrsR	234	2	115	50.4	28.4	1.1e-08
lcl|SIZZ01000002.1_prot_TBR37225.1_2996	3	117	BAC0095crdR	213	4	117	48.1	27	5.4e-08
lcl|SIZZ01000002.1_prot_TBR37226.1_2997	406	518	BAC0468zraS/hydG	465	373	458	52	28.3	2.1e-08
lcl|SIZZ01000002.1_prot_TBR37231.1_3003	4	108	BAC0125czcR	225	1	101	43.1	31.1	5.3e-06
lcl|SIZZ01000002.1_prot_TBR37231.1_3003	4	108	BAC0197irlR	229	1	101	40.4	31.2	3.5e-05
lcl|SIZZ01000002.1_prot_TBR37231.1_3003	41	108	BAC0467zraR/hydH	441	41	107	39.7	31.9	5.9e-05
lcl|SIZZ01000002.1_prot_TBR37231.1_3003	51	108	BAC0083copR	227	46	102	38.5	37.3	0.00013
lcl|SIZZ01000002.1_prot_TBR37269.1_3045	10	267	BAC0169fpvA	815	30	272	52.4	19.4	2.5e-08
lcl|SIZZ01000003.1_prot_TBR36362.1_3073	5	89	BAC0281nmtR	120	17	105	53.1	40.4	1.4e-09
lcl|SIZZ01000003.1_prot_TBR36362.1_3073	10	74	BAC0201kmtR	130	20	84	48.9	46.2	2.6e-08
lcl|SIZZ01000003.1_prot_TBR36362.1_3073	20	74	BAC0685merR	124	45	100	42.4	42.9	2.4e-06
lcl|SIZZ01000003.1_prot_TBR36362.1_3073	10	93	BAC0588arsR	117	6	92	42	35.6	3.1e-06
lcl|SIZZ01000003.1_prot_TBR36362.1_3073	10	83	BAC0593arsR	105	14	88	38.1	33.3	4.5e-05
lcl|SIZZ01000003.1_prot_TBR36362.1_3073	10	74	BAC0594arsR	117	8	73	36.6	37.9	0.00013
lcl|SIZZ01000003.1_prot_TBR36362.1_3073	7	86	BAC0591arsR	117	5	83	35.8	37	0.00023
lcl|SIZZ01000003.1_prot_TBR36362.1_3073	10	74	BAC0589arsR	117	8	73	35	34.8	0.00038
lcl|SIZZ01000003.1_prot_TBR36038.1_3077	44	162	BAC0035arsM	283	75	201	56.6	33.9	3.7e-10
lcl|SIZZ01000003.1_prot_TBR36072.1_3113	6	121	BAC0125czcR	225	1	113	52.8	28.8	4.6e-09
lcl|SIZZ01000003.1_prot_TBR36072.1_3113	6	137	BAC0467zraR/hydH	441	6	138	50.8	27.9	1.8e-08
lcl|SIZZ01000003.1_prot_TBR36072.1_3113	51	120	BAC0111cusR/ylcA	227	44	113	44.3	32.9	1.6e-06
lcl|SIZZ01000003.1_prot_TBR36072.1_3113	53	120	BAC0638copR	231	46	113	43.5	35.2	2.8e-06
lcl|SIZZ01000003.1_prot_TBR36072.1_3113	9	138	BAC0089corR	466	8	150	43.5	24.7	2.8e-06
lcl|SIZZ01000003.1_prot_TBR36072.1_3113	6	120	BAC0197irlR	229	1	112	43.1	29.1	3.7e-06
lcl|SIZZ01000003.1_prot_TBR36072.1_3113	6	120	BAC0753copR	227	1	113	42.7	29.7	4.8e-06
lcl|SIZZ01000003.1_prot_TBR36072.1_3113	6	120	BAC0719copR	230	1	113	42.4	28.8	6.2e-06
lcl|SIZZ01000003.1_prot_TBR36072.1_3113	53	120	BAC0083copR	227	46	113	42	33.8	8.1e-06
lcl|SIZZ01000003.1_prot_TBR36082.1_3125	121	233	BAC0638copR	231	2	119	42.4	28.8	5.8e-06
lcl|SIZZ01000003.1_prot_TBR36082.1_3125	120	228	BAC0095crdR	213	3	117	39.3	24.3	4.9e-05
lcl|SIZZ01000003.1_prot_TBR36094.1_3139	94	282	BAC0224merA	631	291	490	37.4	24	0.00024
lcl|SIZZ01000003.1_prot_TBR36097.1_3142	124	336	BAC0468zraS/hydG	465	251	461	111.7	32.7	1.1e-26
lcl|SIZZ01000003.1_prot_TBR36097.1_3142	43	330	BAC0091corS	491	211	487	78.2	26.4	1.4e-16
lcl|SIZZ01000003.1_prot_TBR36097.1_3142	118	320	BAC0198irlS	464	243	449	54.7	26.1	1.6e-09
lcl|SIZZ01000003.1_prot_TBR36097.1_3142	72	330	BAC0720copS	477	201	474	50.1	23.9	4e-08
lcl|SIZZ01000003.1_prot_TBR36097.1_3142	75	330	BAC0112cusS	480	218	479	47	21.7	3.4e-07
lcl|SIZZ01000003.1_prot_TBR36097.1_3142	126	331	BAC0289nrsS	454	232	446	46.2	25.2	5.8e-07
lcl|SIZZ01000003.1_prot_TBR36097.1_3142	118	331	BAC0126czcS	476	236	454	45.8	25.1	7.5e-07
lcl|SIZZ01000003.1_prot_TBR36097.1_3142	218	332	BAC0309pcoS	466	354	466	40.8	27.3	2.4e-05
lcl|SIZZ01000003.1_prot_TBR36097.1_3142	64	330	BAC0348silS	497	204	484	40.8	22	2.4e-05
lcl|SIZZ01000003.1_prot_TBR36097.1_3142	220	312	BAC0752copS	445	352	443	37.4	34.7	0.00027
lcl|SIZZ01000003.1_prot_TBR36098.1_3143	4	449	BAC0467zraR/hydH	441	7	439	307	43	2.5e-85
lcl|SIZZ01000003.1_prot_TBR36098.1_3143	5	449	BAC0089corR	466	7	452	292.4	40.3	6.3e-81
lcl|SIZZ01000003.1_prot_TBR36098.1_3143	49	458	BAC0022aioR/aoxR	442	54	441	238.8	37.6	8.3e-65
lcl|SIZZ01000003.1_prot_TBR36098.1_3143	1	124	BAC0095crdR	213	1	126	62.4	34.1	1.1e-11
lcl|SIZZ01000003.1_prot_TBR36098.1_3143	5	130	BAC0197irlR	229	3	128	55.5	30.2	1.3e-09
lcl|SIZZ01000003.1_prot_TBR36098.1_3143	7	117	BAC0083copR	227	5	116	54.7	32.1	2.2e-09
lcl|SIZZ01000003.1_prot_TBR36098.1_3143	5	117	BAC0125czcR	225	3	115	54.7	25.7	2.2e-09
lcl|SIZZ01000003.1_prot_TBR36098.1_3143	7	117	BAC0638copR	231	5	116	50.4	29.5	4.2e-08
lcl|SIZZ01000003.1_prot_TBR36098.1_3143	7	114	BAC0487pmrA	222	5	113	48.1	30.3	2.1e-07
lcl|SIZZ01000003.1_prot_TBR36098.1_3143	5	117	BAC0347silR	228	3	116	44.7	26.3	2.3e-06
lcl|SIZZ01000003.1_prot_TBR36098.1_3143	5	117	BAC0308pcoR	226	4	117	43.9	28.1	3.9e-06
lcl|SIZZ01000003.1_prot_TBR36098.1_3143	5	114	BAC0753copR	227	3	113	40.8	27	3.3e-05
lcl|SIZZ01000003.1_prot_TBR36098.1_3143	7	117	BAC0111cusR/ylcA	227	5	116	40.4	24.1	4.3e-05
lcl|SIZZ01000003.1_prot_TBR36098.1_3143	14	127	BAC0288nrsR	234	1	128	38.5	25	0.00016
lcl|SIZZ01000003.1_prot_TBR36098.1_3143	7	117	BAC0719copR	230	5	116	37	24.8	0.00048
lcl|SIZZ01000003.1_prot_TBR36112.1_3158	70	143	BAC0003acn	943	812	884	40	28.4	2.4e-05
lcl|SIZZ01000003.1_prot_TBR36113.1_3159	112	306	BAC0003acn	943	176	380	72	26.8	1.4e-14
lcl|SIZZ01000003.1_prot_TBR36166.1_3222	3	104	BAC0090corR/coaR	370	6	114	62.4	38.5	7.8e-12
lcl|SIZZ01000003.1_prot_TBR36166.1_3222	3	118	BAC0301pbrR	150	4	122	55.8	35.2	7.3e-10
lcl|SIZZ01000003.1_prot_TBR36166.1_3222	3	115	BAC0182golS	154	1	119	55.5	25.2	9.6e-10
lcl|SIZZ01000003.1_prot_TBR36166.1_3222	1	69	BAC0682merR1	132	1	69	55.5	34.8	9.6e-10
lcl|SIZZ01000003.1_prot_TBR36166.1_3222	3	65	BAC0444yfmP	140	4	67	55.5	35.9	9.6e-10
lcl|SIZZ01000003.1_prot_TBR36166.1_3222	3	105	BAC0058cadR	147	1	109	55.1	35.8	1.3e-09
lcl|SIZZ01000003.1_prot_TBR36166.1_3222	3	110	BAC0105cueR/ybbI	135	1	107	50.1	27.9	4e-08
lcl|SIZZ01000003.1_prot_TBR36166.1_3222	5	107	BAC0462zntR/yhdM	141	4	113	47.8	27.3	2e-07
lcl|SIZZ01000003.1_prot_TBR36166.1_3222	3	107	BAC0681merR2	129	4	116	43.5	26.5	3.8e-06
lcl|SIZZ01000003.1_prot_TBR36166.1_3222	3	69	BAC0688merR2	144	8	74	43.5	34.3	3.8e-06
lcl|SIZZ01000003.1_prot_TBR36166.1_3222	1	65	BAC0680merR	135	1	65	42.7	27.7	6.4e-06
lcl|SIZZ01000003.1_prot_TBR36166.1_3222	3	69	BAC0686merR	144	8	74	40.8	32.8	2.4e-05
lcl|SIZZ01000003.1_prot_TBR36166.1_3222	3	69	BAC0684merR2	144	8	74	40.8	32.8	2.4e-05
lcl|SIZZ01000003.1_prot_TBR36166.1_3222	3	69	BAC0232merR	144	8	74	40.4	32.8	3.2e-05
lcl|SIZZ01000003.1_prot_TBR36166.1_3222	3	69	BAC0687merR	144	8	74	40.4	32.8	3.2e-05
lcl|SIZZ01000003.1_prot_TBR36194.1_3253	158	441	BAC0637copS	462	161	439	129.8	32.6	5.5e-32
lcl|SIZZ01000003.1_prot_TBR36194.1_3253	100	449	BAC0198irlS	464	105	450	114.4	28.5	2.4e-27
lcl|SIZZ01000003.1_prot_TBR36194.1_3253	152	441	BAC0720copS	477	174	458	114.4	30.7	2.4e-27
lcl|SIZZ01000003.1_prot_TBR36194.1_3253	128	441	BAC0309pcoS	466	153	448	109.4	29.4	7.8e-26
lcl|SIZZ01000003.1_prot_TBR36194.1_3253	182	441	BAC0752copS	445	182	445	107.8	28.7	2.3e-25
lcl|SIZZ01000003.1_prot_TBR36194.1_3253	173	426	BAC0537copS	487	165	418	106.7	28.5	5e-25
lcl|SIZZ01000003.1_prot_TBR36194.1_3253	171	462	BAC0488pmrB	364	72	357	104.4	30.9	2.5e-24
lcl|SIZZ01000003.1_prot_TBR36194.1_3253	239	456	BAC0289nrsS	454	220	443	101.7	30.7	1.6e-23
lcl|SIZZ01000003.1_prot_TBR36194.1_3253	14	457	BAC0126czcS	476	11	452	100.9	26.2	2.8e-23
lcl|SIZZ01000003.1_prot_TBR36194.1_3253	179	445	BAC0112cusS	480	197	467	98.6	29.7	1.4e-22
lcl|SIZZ01000003.1_prot_TBR36194.1_3253	101	441	BAC0348silS	497	121	468	90.9	25.6	2.9e-20
lcl|SIZZ01000003.1_prot_TBR36194.1_3253	248	455	BAC0468zraS/hydG	465	250	452	77.4	28.1	3.3e-16
lcl|SIZZ01000003.1_prot_TBR36194.1_3253	246	437	BAC0096crdS	397	194	370	47.4	23	3.6e-07
lcl|SIZZ01000003.1_prot_TBR36195.1_3254	1	219	BAC0487pmrA	222	1	218	169.1	41.6	4e-44
lcl|SIZZ01000003.1_prot_TBR36195.1_3254	1	218	BAC0197irlR	229	1	220	159.1	39.2	4.1e-41
lcl|SIZZ01000003.1_prot_TBR36195.1_3254	1	218	BAC0753copR	227	1	222	151	40.6	1.1e-38
lcl|SIZZ01000003.1_prot_TBR36195.1_3254	1	218	BAC0719copR	230	1	222	150.2	38.6	1.9e-38
lcl|SIZZ01000003.1_prot_TBR36195.1_3254	1	218	BAC0125czcR	225	1	220	144.8	36	8.1e-37
lcl|SIZZ01000003.1_prot_TBR36195.1_3254	1	218	BAC0083copR	227	1	222	134	35	1.4e-33
lcl|SIZZ01000003.1_prot_TBR36195.1_3254	1	218	BAC0638copR	231	1	222	132.1	33.6	5.4e-33
lcl|SIZZ01000003.1_prot_TBR36195.1_3254	1	218	BAC0347silR	228	1	224	131	35.1	1.2e-32
lcl|SIZZ01000003.1_prot_TBR36195.1_3254	1	218	BAC0111cusR/ylcA	227	1	222	130.2	33.6	2.1e-32
lcl|SIZZ01000003.1_prot_TBR36195.1_3254	2	218	BAC0308pcoR	226	3	222	128.3	31.2	7.8e-32
lcl|SIZZ01000003.1_prot_TBR36195.1_3254	1	215	BAC0288nrsR	234	1	228	104	30.6	1.6e-24
lcl|SIZZ01000003.1_prot_TBR36195.1_3254	2	215	BAC0095crdR	213	4	208	84.7	26.6	9.9e-19
lcl|SIZZ01000003.1_prot_TBR36195.1_3254	4	126	BAC0467zraR/hydH	441	9	130	54.3	22.8	1.4e-09
lcl|SIZZ01000003.1_prot_TBR36195.1_3254	3	133	BAC0089corR	466	6	135	47.4	26.9	1.8e-07
lcl|SIZZ01000003.1_prot_TBR36207.1_3269	51	418	BAC0645mdtA	413	49	412	255.8	40	6e-70
lcl|SIZZ01000003.1_prot_TBR36207.1_3269	56	384	BAC0120czcB	520	177	508	74.7	24.5	1.9e-15
lcl|SIZZ01000003.1_prot_TBR36207.1_3269	59	360	BAC0460zneB/hmxB	385	66	361	67.8	24.8	2.3e-13
lcl|SIZZ01000003.1_prot_TBR36208.1_3270	2	1071	BAC0646mdtB	1040	11	1039	971.1	50.9	7.2e-285
lcl|SIZZ01000003.1_prot_TBR36208.1_3270	1	1068	BAC0647mdtC	1026	1	1018	864	47.1	1.2e-252
lcl|SIZZ01000003.1_prot_TBR36208.1_3270	4	1056	BAC0563acrD	1037	2	1028	342.8	27.2	9.6e-96
lcl|SIZZ01000003.1_prot_TBR36208.1_3270	19	1061	BAC0286nrsA	1054	25	1027	259.2	24.6	1.4e-70
lcl|SIZZ01000003.1_prot_TBR36208.1_3270	16	1051	BAC0130czrA	1051	15	1033	251.5	24.1	2.9e-68
lcl|SIZZ01000003.1_prot_TBR36208.1_3270	24	1056	BAC0119czcA	1063	26	1038	248.4	23.7	2.5e-67
lcl|SIZZ01000003.1_prot_TBR36208.1_3270	8	1051	BAC0127cznA	1019	10	1008	213	23.1	1.1e-56
lcl|SIZZ01000003.1_prot_TBR36208.1_3270	8	1051	BAC0267nczA	1043	2	1032	206.1	23.6	1.4e-54
lcl|SIZZ01000003.1_prot_TBR36208.1_3270	8	1068	BAC0107cusA/ybdE	1047	6	1047	198.4	23.1	2.9e-52
lcl|SIZZ01000003.1_prot_TBR36208.1_3270	16	1050	BAC0549nccA	1076	15	1055	190.7	22.6	6.1e-50
lcl|SIZZ01000003.1_prot_TBR36208.1_3270	8	1062	BAC0341silA	1048	6	1041	189.5	23	1.4e-49
lcl|SIZZ01000003.1_prot_TBR36208.1_3270	17	1050	BAC0203cnrA	1076	19	1055	185.7	22.5	2e-48
lcl|SIZZ01000003.1_prot_TBR36209.1_3271	7	1023	BAC0646mdtB	1040	16	1031	776.2	44	3.3e-226
lcl|SIZZ01000003.1_prot_TBR36209.1_3271	7	1017	BAC0647mdtC	1026	7	1011	760.8	44.2	1.4e-221
lcl|SIZZ01000003.1_prot_TBR36209.1_3271	7	1013	BAC0563acrD	1037	5	1025	342.8	29.1	9.3e-96
lcl|SIZZ01000003.1_prot_TBR36209.1_3271	16	1011	BAC0119czcA	1063	18	1033	254.2	23.5	4.3e-69
lcl|SIZZ01000003.1_prot_TBR36209.1_3271	16	1011	BAC0130czrA	1051	18	1033	235.3	22.7	2.1e-63
lcl|SIZZ01000003.1_prot_TBR36209.1_3271	16	1014	BAC0286nrsA	1054	22	1023	232.6	23.4	1.3e-62
lcl|SIZZ01000003.1_prot_TBR36209.1_3271	8	1032	BAC0107cusA/ybdE	1047	6	1047	211.5	23.1	3.2e-56
lcl|SIZZ01000003.1_prot_TBR36209.1_3271	63	1010	BAC0549nccA	1076	65	1055	209.9	23.2	9.4e-56
lcl|SIZZ01000003.1_prot_TBR36209.1_3271	15	1011	BAC0267nczA	1043	18	1032	204.1	23.5	5.1e-54
lcl|SIZZ01000003.1_prot_TBR36209.1_3271	8	1011	BAC0341silA	1048	6	1035	196.1	22.5	1.4e-51
lcl|SIZZ01000003.1_prot_TBR36209.1_3271	21	1010	BAC0203cnrA	1076	23	1055	189.1	21.7	1.7e-49
lcl|SIZZ01000003.1_prot_TBR36209.1_3271	8	1011	BAC0127cznA	1019	10	1008	186	22.8	1.4e-48
lcl|SIZZ01000003.1_prot_TBR36218.1_3281	29	127	BAC0467zraR/hydH	441	32	133	55.1	34.3	8.9e-10
lcl|SIZZ01000003.1_prot_TBR36218.1_3281	1	123	BAC0083copR	227	1	121	53.5	31.7	2.6e-09
lcl|SIZZ01000003.1_prot_TBR36218.1_3281	2	113	BAC0095crdR	213	4	117	45.8	29.9	5.4e-07
lcl|SIZZ01000003.1_prot_TBR36224.1_3287	11	88	BAC0366smtB/ziaR	122	36	112	43.5	35.9	2.5e-06
lcl|SIZZ01000003.1_prot_TBR36224.1_3287	11	87	BAC0071cmtR	118	11	86	43.1	36.4	3.3e-06
lcl|SIZZ01000003.1_prot_TBR36226.1_3289	43	355	BAC0356recG	691	293	603	44.3	22.2	3e-06
lcl|SIZZ01000003.1_prot_TBR36230.1_3293	12	223	BAC0607tupC	214	3	209	100.5	30.1	2.5e-23
lcl|SIZZ01000003.1_prot_TBR36230.1_3293	10	218	BAC0440yfeB	296	9	221	92.4	29.1	6.7e-21
lcl|SIZZ01000003.1_prot_TBR36230.1_3293	6	222	BAC0400troB	266	5	227	88.2	28.3	1.3e-19
lcl|SIZZ01000003.1_prot_TBR36230.1_3293	28	223	BAC0604wtpC	344	16	211	86.7	30.3	3.7e-19
lcl|SIZZ01000003.1_prot_TBR36230.1_3293	28	220	BAC0465znuC/yebM	251	20	203	83.6	31.7	3.1e-18
lcl|SIZZ01000003.1_prot_TBR36230.1_3293	10	270	BAC0162fbpC	356	10	266	82.8	26.5	5.3e-18
lcl|SIZZ01000003.1_prot_TBR36230.1_3293	28	223	BAC0274nikE	268	28	232	81.3	30.2	1.5e-17
lcl|SIZZ01000003.1_prot_TBR36230.1_3293	12	234	BAC0164fecE	255	3	234	77.8	25.2	1.7e-16
lcl|SIZZ01000003.1_prot_TBR36230.1_3293	8	223	BAC0316pstB	257	6	232	72.4	26.5	7.2e-15
lcl|SIZZ01000003.1_prot_TBR36230.1_3293	22	232	BAC0433ybtQ	600	356	568	67	26.9	3e-13
lcl|SIZZ01000003.1_prot_TBR36230.1_3293	31	221	BAC0611modC	352	17	207	64.3	25.9	2e-12
lcl|SIZZ01000003.1_prot_TBR36230.1_3293	27	208	BAC0432ybtP	600	359	544	64.3	28.4	2e-12
lcl|SIZZ01000003.1_prot_TBR36230.1_3293	30	230	BAC0273nikD	254	21	228	60.5	28.8	2.8e-11
lcl|SIZZ01000003.1_prot_TBR36230.1_3293	26	256	BAC0311pgpA/ltpgpA	1548	648	881	57.4	25.6	2.4e-10
lcl|SIZZ01000003.1_prot_TBR36230.1_3293	43	236	BAC0600modC	253	32	240	54.7	21.1	1.6e-09
lcl|SIZZ01000003.1_prot_TBR36239.1_3302	2	210	BAC0607tupC	214	3	207	112.8	33.8	3.6e-27
lcl|SIZZ01000003.1_prot_TBR36239.1_3302	1	231	BAC0162fbpC	356	11	243	104.8	30.9	9.9e-25
lcl|SIZZ01000003.1_prot_TBR36239.1_3302	2	217	BAC0164fecE	255	3	223	102.8	31.2	3.8e-24
lcl|SIZZ01000003.1_prot_TBR36239.1_3302	1	243	BAC0604wtpC	344	1	241	102.1	29.6	6.4e-24
lcl|SIZZ01000003.1_prot_TBR36239.1_3302	1	207	BAC0465znuC/yebM	251	4	196	89.4	29.7	4.3e-20
lcl|SIZZ01000003.1_prot_TBR36239.1_3302	17	211	BAC0274nikE	268	28	231	87.4	29.4	1.6e-19
lcl|SIZZ01000003.1_prot_TBR36239.1_3302	29	212	BAC0611modC	352	26	209	85.1	31.4	8.1e-19
lcl|SIZZ01000003.1_prot_TBR36239.1_3302	2	212	BAC0400troB	266	11	228	84.3	30.5	1.4e-18
lcl|SIZZ01000003.1_prot_TBR36239.1_3302	1	211	BAC0600modC	253	1	222	83.6	32.6	2.4e-18
lcl|SIZZ01000003.1_prot_TBR36239.1_3302	16	205	BAC0440yfeB	296	26	219	68.9	25.5	6e-14
lcl|SIZZ01000003.1_prot_TBR36239.1_3302	12	211	BAC0433ybtQ	600	356	558	61.2	27.9	1.3e-11
lcl|SIZZ01000003.1_prot_TBR36239.1_3302	13	210	BAC0432ybtP	600	356	556	60.1	28.6	2.8e-11
lcl|SIZZ01000003.1_prot_TBR36239.1_3302	17	239	BAC0273nikD	254	19	251	56.2	27	4.1e-10
lcl|SIZZ01000003.1_prot_TBR36262.1_3327	117	460	BAC0720copS	477	97	455	121.7	29.5	1.6e-29
lcl|SIZZ01000003.1_prot_TBR36262.1_3327	184	483	BAC0488pmrB	364	63	357	111.7	28.9	1.7e-26
lcl|SIZZ01000003.1_prot_TBR36262.1_3327	179	462	BAC0198irlS	464	144	442	109	30.3	1.1e-25
lcl|SIZZ01000003.1_prot_TBR36262.1_3327	197	478	BAC0112cusS	480	194	476	106.7	29.3	5.3e-25
lcl|SIZZ01000003.1_prot_TBR36262.1_3327	258	478	BAC0289nrsS	454	217	442	105.1	31.3	1.5e-24
lcl|SIZZ01000003.1_prot_TBR36262.1_3327	200	462	BAC0752copS	445	182	444	92.8	28.4	7.9e-21
lcl|SIZZ01000003.1_prot_TBR36262.1_3327	162	459	BAC0348silS	497	143	464	90.5	25.8	3.9e-20
lcl|SIZZ01000003.1_prot_TBR36262.1_3327	199	459	BAC0637copS	462	168	435	86.3	27.7	7.4e-19
lcl|SIZZ01000003.1_prot_TBR36262.1_3327	202	488	BAC0126czcS	476	169	473	84	28.8	3.7e-18
lcl|SIZZ01000003.1_prot_TBR36262.1_3327	215	459	BAC0537copS	487	185	434	80.9	26.2	3.1e-17
lcl|SIZZ01000003.1_prot_TBR36262.1_3327	255	459	BAC0096crdS	397	181	370	45.4	22	1.5e-06
lcl|SIZZ01000003.1_prot_TBR36263.1_3328	1	218	BAC0487pmrA	222	1	216	183.7	44.5	1.5e-48
lcl|SIZZ01000003.1_prot_TBR36263.1_3328	1	219	BAC0083copR	227	1	222	164.5	41.7	9.6e-43
lcl|SIZZ01000003.1_prot_TBR36263.1_3328	1	219	BAC0719copR	230	1	222	157.1	40.4	1.5e-40
lcl|SIZZ01000003.1_prot_TBR36263.1_3328	1	219	BAC0347silR	228	1	224	156.4	39.6	2.6e-40
lcl|SIZZ01000003.1_prot_TBR36263.1_3328	1	219	BAC0638copR	231	1	222	155.2	39.5	5.8e-40
lcl|SIZZ01000003.1_prot_TBR36263.1_3328	1	219	BAC0111cusR/ylcA	227	1	222	152.1	38.1	4.9e-39
lcl|SIZZ01000003.1_prot_TBR36263.1_3328	1	219	BAC0125czcR	225	1	220	151.4	39.2	8.4e-39
lcl|SIZZ01000003.1_prot_TBR36263.1_3328	1	219	BAC0197irlR	229	1	220	149.1	38.3	4.2e-38
lcl|SIZZ01000003.1_prot_TBR36263.1_3328	2	219	BAC0308pcoR	226	3	222	145.6	38	4.6e-37
lcl|SIZZ01000003.1_prot_TBR36263.1_3328	1	219	BAC0753copR	227	1	222	145.2	38.1	6e-37
lcl|SIZZ01000003.1_prot_TBR36263.1_3328	1	217	BAC0288nrsR	234	1	229	122.9	34.9	3.2e-30
lcl|SIZZ01000003.1_prot_TBR36263.1_3328	2	217	BAC0095crdR	213	4	209	72	24.4	6.5e-15
lcl|SIZZ01000003.1_prot_TBR36263.1_3328	3	139	BAC0467zraR/hydH	441	8	144	54.7	25.5	1.1e-09
lcl|SIZZ01000003.1_prot_TBR36263.1_3328	2	117	BAC0022aioR/aoxR	442	7	123	53.5	29.2	2.4e-09
lcl|SIZZ01000003.1_prot_TBR36387.1_3332	1	216	BAC0604wtpC	344	1	210	108.6	31.8	6.3e-26
lcl|SIZZ01000003.1_prot_TBR36387.1_3332	11	216	BAC0274nikE	268	18	231	107.5	33.6	1.4e-25
lcl|SIZZ01000003.1_prot_TBR36387.1_3332	16	216	BAC0162fbpC	356	25	225	96.7	29.5	2.5e-22
lcl|SIZZ01000003.1_prot_TBR36387.1_3332	9	215	BAC0607tupC	214	9	207	96.7	30.3	2.5e-22
lcl|SIZZ01000003.1_prot_TBR36387.1_3332	35	214	BAC0600modC	253	34	220	93.2	33.2	2.8e-21
lcl|SIZZ01000003.1_prot_TBR36387.1_3332	2	225	BAC0433ybtQ	600	344	567	90.9	31.3	1.4e-20
lcl|SIZZ01000003.1_prot_TBR36387.1_3332	33	224	BAC0611modC	352	29	216	90.1	32	2.3e-20
lcl|SIZZ01000003.1_prot_TBR36387.1_3332	2	200	BAC0432ybtP	600	342	542	83.2	31.6	2.9e-18
lcl|SIZZ01000003.1_prot_TBR36387.1_3332	11	216	BAC0316pstB	257	19	231	82	30.1	6.4e-18
lcl|SIZZ01000003.1_prot_TBR36387.1_3332	5	217	BAC0440yfeB	296	14	226	80.5	27.7	1.9e-17
lcl|SIZZ01000003.1_prot_TBR36387.1_3332	1	212	BAC0465znuC/yebM	251	4	196	78.6	30.6	7e-17
lcl|SIZZ01000003.1_prot_TBR36387.1_3332	18	220	BAC0400troB	266	26	225	75.1	33.3	7.8e-16
lcl|SIZZ01000003.1_prot_TBR36387.1_3332	21	216	BAC0273nikD	254	22	220	64.7	30	1.1e-12
lcl|SIZZ01000003.1_prot_TBR36268.1_3334	48	189	BAC0719copR	230	33	169	57.8	32.2	1.6e-10
lcl|SIZZ01000003.1_prot_TBR36268.1_3334	14	99	BAC0089corR	466	5	87	48.9	33.7	7.4e-08
lcl|SIZZ01000003.1_prot_TBR36268.1_3334	46	157	BAC0083copR	227	33	141	41.6	29.2	1.2e-05
lcl|SIZZ01000003.1_prot_TBR36268.1_3334	143	268	BAC0288nrsR	234	3	115	41.6	28.6	1.2e-05
lcl|SIZZ01000003.1_prot_TBR36268.1_3334	15	159	BAC0111cusR/ylcA	227	2	142	41.2	21.9	1.5e-05
lcl|SIZZ01000003.1_prot_TBR36268.1_3334	48	130	BAC0638copR	231	33	113	40.8	28.9	2e-05
lcl|SIZZ01000003.1_prot_TBR36268.1_3334	15	189	BAC0308pcoR	226	3	169	38.9	24	7.7e-05
lcl|SIZZ01000003.1_prot_TBR36271.1_3337	4	221	BAC0197irlR	229	3	219	188	46.8	8.5e-50
lcl|SIZZ01000003.1_prot_TBR36271.1_3337	1	221	BAC0308pcoR	226	1	221	181	43.4	1e-47
lcl|SIZZ01000003.1_prot_TBR36271.1_3337	4	221	BAC0719copR	230	3	221	180.6	47	1.4e-47
lcl|SIZZ01000003.1_prot_TBR36271.1_3337	4	221	BAC0753copR	227	3	221	177.9	44.7	8.8e-47
lcl|SIZZ01000003.1_prot_TBR36271.1_3337	4	221	BAC0125czcR	225	3	219	177.6	45	1.1e-46
lcl|SIZZ01000003.1_prot_TBR36271.1_3337	4	221	BAC0111cusR/ylcA	227	3	221	172.2	42.5	4.8e-45
lcl|SIZZ01000003.1_prot_TBR36271.1_3337	4	221	BAC0083copR	227	3	221	171.8	42.9	6.3e-45
lcl|SIZZ01000003.1_prot_TBR36271.1_3337	4	221	BAC0638copR	231	3	221	163.7	40.6	1.7e-42
lcl|SIZZ01000003.1_prot_TBR36271.1_3337	4	221	BAC0347silR	228	3	223	155.6	41.6	4.7e-40
lcl|SIZZ01000003.1_prot_TBR36271.1_3337	4	226	BAC0487pmrA	222	3	221	129.8	31.8	2.7e-32
lcl|SIZZ01000003.1_prot_TBR36271.1_3337	4	219	BAC0288nrsR	234	3	228	111.3	30.1	1e-26
lcl|SIZZ01000003.1_prot_TBR36271.1_3337	2	137	BAC0089corR	466	5	135	73.6	30.1	2.3e-15
lcl|SIZZ01000003.1_prot_TBR36271.1_3337	4	219	BAC0095crdR	213	5	208	72.8	25.1	4e-15
lcl|SIZZ01000003.1_prot_TBR36271.1_3337	4	149	BAC0022aioR/aoxR	442	8	155	72.4	28.9	5.2e-15
lcl|SIZZ01000003.1_prot_TBR36271.1_3337	4	117	BAC0467zraR/hydH	441	8	121	65.9	34.2	4.9e-13
lcl|SIZZ01000003.1_prot_TBR36272.1_3338	187	449	BAC0198irlS	464	194	456	114.4	28.6	2.5e-27
lcl|SIZZ01000003.1_prot_TBR36272.1_3338	159	432	BAC0720copS	477	180	455	111.7	29.9	1.6e-26
lcl|SIZZ01000003.1_prot_TBR36272.1_3338	187	448	BAC0112cusS	480	213	476	100.5	27.2	3.7e-23
lcl|SIZZ01000003.1_prot_TBR36272.1_3338	169	432	BAC0126czcS	476	170	433	98.6	28.8	1.4e-22
lcl|SIZZ01000003.1_prot_TBR36272.1_3338	176	431	BAC0637copS	462	178	435	95.5	23.3	1.2e-21
lcl|SIZZ01000003.1_prot_TBR36272.1_3338	9	432	BAC0752copS	445	11	442	90.5	23.7	3.8e-20
lcl|SIZZ01000003.1_prot_TBR36272.1_3338	140	432	BAC0309pcoS	466	152	445	90.1	24.6	5e-20
lcl|SIZZ01000003.1_prot_TBR36272.1_3338	188	431	BAC0488pmrB	364	94	333	77	26.4	4.4e-16
lcl|SIZZ01000003.1_prot_TBR36272.1_3338	165	448	BAC0348silS	497	189	481	76.6	24.6	5.7e-16
lcl|SIZZ01000003.1_prot_TBR36272.1_3338	243	449	BAC0468zraS/hydG	465	252	453	67.4	25.1	3.5e-13
lcl|SIZZ01000003.1_prot_TBR36273.1_3339	3	1044	BAC0646mdtB	1040	11	1019	301.2	25.9	3.2e-83
lcl|SIZZ01000003.1_prot_TBR36273.1_3339	4	1044	BAC0286nrsA	1054	9	1020	285	25.8	2.3e-78
lcl|SIZZ01000003.1_prot_TBR36273.1_3339	4	1047	BAC0107cusA/ybdE	1047	5	1038	282	26.6	2e-77
lcl|SIZZ01000003.1_prot_TBR36273.1_3339	4	1062	BAC0130czrA	1051	5	1051	275	25.5	2.4e-75
lcl|SIZZ01000003.1_prot_TBR36273.1_3339	4	1066	BAC0119czcA	1063	5	1054	274.2	25	4.1e-75
lcl|SIZZ01000003.1_prot_TBR36273.1_3339	7	1050	BAC0267nczA	1043	6	1038	272.3	25.9	1.6e-74
lcl|SIZZ01000003.1_prot_TBR36273.1_3339	4	1047	BAC0341silA	1048	5	1038	268.9	25.7	1.7e-73
lcl|SIZZ01000003.1_prot_TBR36273.1_3339	17	1057	BAC0549nccA	1076	15	1069	268.1	25.7	3e-73
lcl|SIZZ01000003.1_prot_TBR36273.1_3339	11	1044	BAC0647mdtC	1026	10	1005	263.1	24.5	9.6e-72
lcl|SIZZ01000003.1_prot_TBR36273.1_3339	4	1047	BAC0127cznA	1019	5	1011	250	23.6	8.4e-68
lcl|SIZZ01000003.1_prot_TBR36273.1_3339	13	1059	BAC0203cnrA	1076	12	1070	247.3	25.5	5.4e-67
lcl|SIZZ01000003.1_prot_TBR36273.1_3339	9	1050	BAC0563acrD	1037	6	1029	223	24.2	1.1e-59
lcl|SIZZ01000003.1_prot_TBR36274.1_3340	74	393	BAC0645mdtA	413	79	401	102.8	27.6	6.2e-24
lcl|SIZZ01000003.1_prot_TBR36274.1_3340	56	364	BAC0204cnrB	395	73	375	69.3	26.1	7.5e-14
lcl|SIZZ01000003.1_prot_TBR36274.1_3340	56	364	BAC0550nccB	397	75	377	64.7	26.1	1.9e-12
lcl|SIZZ01000003.1_prot_TBR36274.1_3340	20	364	BAC0460zneB/hmxB	385	14	363	58.2	23.1	1.7e-10
lcl|SIZZ01000003.1_prot_TBR36274.1_3340	49	363	BAC0120czcB	520	187	498	53.1	21.4	5.6e-09
lcl|SIZZ01000003.1_prot_TBR36274.1_3340	70	367	BAC0131czrB	405	124	387	46.6	23.5	5.2e-07
lcl|SIZZ01000003.1_prot_TBR36275.1_3341	17	473	BAC0374srpC	470	14	466	186.8	31.2	4e-49
lcl|SIZZ01000003.1_prot_TBR36275.1_3341	8	471	BAC0109cusC/ylcB	457	6	457	166	28	7.4e-43
lcl|SIZZ01000003.1_prot_TBR36275.1_3341	8	472	BAC0343silC	461	6	459	156	27.3	7.6e-40
lcl|SIZZ01000003.1_prot_TBR36284.1_3351	256	540	BAC0468zraS/hydG	465	185	455	97.4	26.5	4.4e-22
lcl|SIZZ01000003.1_prot_TBR36284.1_3351	282	542	BAC0091corS	491	254	489	84.7	25.6	3e-18
lcl|SIZZ01000003.1_prot_TBR36284.1_3351	312	540	BAC0289nrsS	454	219	445	61.6	24	2.7e-11
lcl|SIZZ01000003.1_prot_TBR36284.1_3351	279	540	BAC0198irlS	464	205	460	57.8	23.5	3.9e-10
lcl|SIZZ01000003.1_prot_TBR36284.1_3351	559	679	BAC0022aioR/aoxR	442	3	122	52.8	35.2	1.3e-08
lcl|SIZZ01000003.1_prot_TBR36284.1_3351	565	676	BAC0095crdR	213	5	116	52	30.1	2.1e-08
lcl|SIZZ01000003.1_prot_TBR36284.1_3351	561	679	BAC0089corR	466	3	119	50.1	28.6	8.1e-08
lcl|SIZZ01000003.1_prot_TBR36284.1_3351	565	642	BAC0753copR	227	3	79	48.9	37.2	1.8e-07
lcl|SIZZ01000003.1_prot_TBR36284.1_3351	565	682	BAC0125czcR	225	3	118	45.4	32.8	2e-06
lcl|SIZZ01000003.1_prot_TBR36284.1_3351	565	642	BAC0197irlR	229	3	78	45.4	33.3	2e-06
lcl|SIZZ01000003.1_prot_TBR36284.1_3351	565	642	BAC0347silR	228	3	79	44.7	33.3	3.4e-06
lcl|SIZZ01000003.1_prot_TBR36284.1_3351	565	679	BAC0719copR	230	3	116	44.7	31	3.4e-06
lcl|SIZZ01000003.1_prot_TBR36284.1_3351	565	642	BAC0638copR	231	3	79	43.9	33.3	5.8e-06
lcl|SIZZ01000003.1_prot_TBR36284.1_3351	565	679	BAC0083copR	227	3	116	43.1	33.3	9.9e-06
lcl|SIZZ01000003.1_prot_TBR36284.1_3351	565	642	BAC0111cusR/ylcA	227	3	79	42.7	29.5	1.3e-05
lcl|SIZZ01000003.1_prot_TBR36296.1_3367	86	655	BAC0169fpvA	815	150	700	50.1	21	9.3e-08
lcl|SIZZ01000003.1_prot_TBR36309.1_3380	11	255	BAC0400troB	266	8	239	113.6	33.9	2.4e-27
lcl|SIZZ01000003.1_prot_TBR36309.1_3380	13	231	BAC0465znuC/yebM	251	4	194	86.3	31.4	4.1e-19
lcl|SIZZ01000003.1_prot_TBR36309.1_3380	29	247	BAC0604wtpC	344	16	220	84.3	30.5	1.6e-18
lcl|SIZZ01000003.1_prot_TBR36309.1_3380	28	261	BAC0164fecE	255	17	241	84	28.5	2e-18
lcl|SIZZ01000003.1_prot_TBR36309.1_3380	42	252	BAC0611modC	352	27	223	83.2	30.2	3.5e-18
lcl|SIZZ01000003.1_prot_TBR36309.1_3380	23	247	BAC0433ybtQ	600	356	568	83.2	29.8	3.5e-18
lcl|SIZZ01000003.1_prot_TBR36309.1_3380	12	231	BAC0440yfeB	296	9	219	82.8	28.8	4.5e-18
lcl|SIZZ01000003.1_prot_TBR36309.1_3380	28	241	BAC0162fbpC	356	26	229	80.5	28.4	2.2e-17
lcl|SIZZ01000003.1_prot_TBR36309.1_3380	25	236	BAC0607tupC	214	14	207	76.6	30	3.2e-16
lcl|SIZZ01000003.1_prot_TBR36309.1_3380	29	256	BAC0316pstB	257	26	250	75.9	28.2	5.5e-16
lcl|SIZZ01000003.1_prot_TBR36309.1_3380	29	249	BAC0432ybtP	600	360	569	69.7	27.3	4e-14
lcl|SIZZ01000003.1_prot_TBR36309.1_3380	28	237	BAC0274nikE	268	27	231	65.9	25.1	5.7e-13
lcl|SIZZ01000003.1_prot_TBR36309.1_3380	32	240	BAC0273nikD	254	22	223	64.3	26.9	1.7e-12
lcl|SIZZ01000003.1_prot_TBR36309.1_3380	40	237	BAC0600modC	253	28	222	61.2	28.3	1.4e-11
lcl|SIZZ01000003.1_prot_TBR36309.1_3380	28	240	BAC0311pgpA/ltpgpA	1548	649	837	56.6	27.7	3.5e-10
lcl|SIZZ01000003.1_prot_TBR36330.1_3403	13	71	BAC0076comR/ycfQ	210	14	71	37.7	35.6	0.00013
lcl|SIZZ01000003.1_prot_TBR36352.1_3426	30	430	BAC0467zraR/hydH	441	29	435	276.6	38.1	3.5e-76
lcl|SIZZ01000003.1_prot_TBR36352.1_3426	137	445	BAC0089corR	466	144	463	243.4	41.9	3.3e-66
lcl|SIZZ01000003.1_prot_TBR36352.1_3426	105	431	BAC0022aioR/aoxR	442	103	426	239.2	41.3	6.2e-65
lcl|SIZZ01000004.1_prot_TBR35806.1_3467	8	100	BAC0125czcR	225	127	219	51.6	35.1	2.2e-08
lcl|SIZZ01000004.1_prot_TBR35806.1_3467	11	103	BAC0753copR	227	132	224	50.8	33	3.7e-08
lcl|SIZZ01000004.1_prot_TBR35806.1_3467	11	103	BAC0111cusR/ylcA	227	132	224	49.3	34	1.1e-07
lcl|SIZZ01000004.1_prot_TBR35806.1_3467	11	100	BAC0083copR	227	132	221	47	29.7	5.3e-07
lcl|SIZZ01000004.1_prot_TBR35806.1_3467	3	103	BAC0638copR	231	124	224	45.8	30.4	1.2e-06
lcl|SIZZ01000004.1_prot_TBR35811.1_3472	8	366	BAC0645mdtA	413	34	387	120.6	27.3	2.8e-29
lcl|SIZZ01000004.1_prot_TBR35811.1_3472	67	293	BAC0460zneB/hmxB	385	93	317	54.3	23.9	2.5e-09
lcl|SIZZ01000004.1_prot_TBR35811.1_3472	66	356	BAC0131czrB	405	137	388	51.6	25.2	1.6e-08
lcl|SIZZ01000004.1_prot_TBR35812.1_3473	3	1039	BAC0563acrD	1037	1	1027	714.9	40.3	9.2e-208
lcl|SIZZ01000004.1_prot_TBR35812.1_3473	4	1037	BAC0646mdtB	1040	13	1021	410.6	29.6	3.7e-116
lcl|SIZZ01000004.1_prot_TBR35812.1_3473	1	1036	BAC0647mdtC	1026	1	1006	404.1	30.1	3.5e-114
lcl|SIZZ01000004.1_prot_TBR35812.1_3473	25	1056	BAC0119czcA	1063	27	1054	256.1	25.4	1.2e-69
lcl|SIZZ01000004.1_prot_TBR35812.1_3473	2	1035	BAC0130czrA	1051	4	1033	250.4	25.5	6.4e-68
lcl|SIZZ01000004.1_prot_TBR35812.1_3473	16	1041	BAC0286nrsA	1054	22	1026	226.9	23.4	7.6e-61
lcl|SIZZ01000004.1_prot_TBR35812.1_3473	12	1053	BAC0107cusA/ybdE	1047	16	1047	211.1	23.5	4.3e-56
lcl|SIZZ01000004.1_prot_TBR35812.1_3473	18	1044	BAC0341silA	1048	20	1042	208.4	23.1	2.8e-55
lcl|SIZZ01000004.1_prot_TBR35812.1_3473	17	1032	BAC0203cnrA	1076	19	1053	203.4	23.9	9e-54
lcl|SIZZ01000004.1_prot_TBR35812.1_3473	13	1037	BAC0267nczA	1043	12	1034	200.3	24.1	7.6e-53
lcl|SIZZ01000004.1_prot_TBR35812.1_3473	20	1032	BAC0549nccA	1076	19	1053	199.1	23.1	1.7e-52
lcl|SIZZ01000004.1_prot_TBR35812.1_3473	2	1032	BAC0127cznA	1019	4	1005	181.8	22.3	2.8e-47
lcl|SIZZ01000004.1_prot_TBR35989.1_3474	24	479	BAC0374srpC	470	8	470	207.6	32.1	2.2e-55
lcl|SIZZ01000004.1_prot_TBR35989.1_3474	20	474	BAC0343silC	461	5	459	175.6	27.3	9.2e-46
lcl|SIZZ01000004.1_prot_TBR35989.1_3474	20	473	BAC0109cusC/ylcB	457	5	457	172.2	28.3	1e-44
lcl|SIZZ01000004.1_prot_TBR35835.1_3498	17	173	BAC0076comR/ycfQ	210	22	186	40	26.5	2.4e-05
lcl|SIZZ01000004.1_prot_TBR35861.1_3526	50	163	BAC0638copR	231	46	162	45.8	24.8	5e-07
lcl|SIZZ01000004.1_prot_TBR35861.1_3526	4	120	BAC0753copR	227	3	116	45.1	24.4	8.5e-07
lcl|SIZZ01000004.1_prot_TBR35992.1_3527	754	1006	BAC0112cusS	480	225	479	82.4	27.5	2.5e-17
lcl|SIZZ01000004.1_prot_TBR35992.1_3527	791	1006	BAC0289nrsS	454	226	445	81.3	31.4	5.6e-17
lcl|SIZZ01000004.1_prot_TBR35992.1_3527	785	1010	BAC0637copS	462	234	459	78.6	27.9	3.6e-16
lcl|SIZZ01000004.1_prot_TBR35992.1_3527	754	1013	BAC0348silS	497	226	491	75.5	25.3	3e-15
lcl|SIZZ01000004.1_prot_TBR35992.1_3527	755	1009	BAC0488pmrB	364	109	358	71.2	27.4	5.7e-14
lcl|SIZZ01000004.1_prot_TBR35992.1_3527	790	978	BAC0537copS	487	237	424	69.3	27.5	2.2e-13
lcl|SIZZ01000004.1_prot_TBR35992.1_3527	767	1008	BAC0720copS	477	235	476	68.9	26.5	2.9e-13
lcl|SIZZ01000004.1_prot_TBR35992.1_3527	756	983	BAC0309pcoS	466	213	442	57.4	25.9	8.6e-10
lcl|SIZZ01000004.1_prot_TBR35992.1_3527	790	982	BAC0752copS	445	245	438	56.2	28.4	1.9e-09
lcl|SIZZ01000004.1_prot_TBR35992.1_3527	757	1007	BAC0091corS	491	255	488	54.7	23.9	5.6e-09
lcl|SIZZ01000004.1_prot_TBR35878.1_3545	185	425	BAC0467zraR/hydH	441	140	371	132.5	36.4	9.7e-33
lcl|SIZZ01000004.1_prot_TBR35878.1_3545	169	440	BAC0089corR	466	122	389	129.8	33.9	6.3e-32
lcl|SIZZ01000004.1_prot_TBR35878.1_3545	210	426	BAC0022aioR/aoxR	442	156	362	100.9	33.6	3.1e-23
lcl|SIZZ01000004.1_prot_TBR35907.1_3574	72	257	BAC0599modB	233	21	221	37.7	25.4	0.00017
lcl|SIZZ01000004.1_prot_TBR35908.1_3575	66	289	BAC0610modB	229	8	226	42	24.2	9.5e-06
lcl|SIZZ01000004.1_prot_TBR35927.1_3594	1	134	BAC0125czcR	225	1	127	67	38.4	2.2e-13
lcl|SIZZ01000004.1_prot_TBR35927.1_3594	1	117	BAC0197irlR	229	1	121	58.9	35.8	6e-11
lcl|SIZZ01000004.1_prot_TBR35927.1_3594	1	115	BAC0083copR	227	1	113	57.4	39	1.7e-10
lcl|SIZZ01000004.1_prot_TBR35927.1_3594	1	131	BAC0638copR	231	1	132	55.1	34.8	8.7e-10
lcl|SIZZ01000004.1_prot_TBR35927.1_3594	3	117	BAC0089corR	466	7	121	51.6	34.7	9.6e-09
lcl|SIZZ01000004.1_prot_TBR35927.1_3594	1	115	BAC0753copR	227	1	113	47.8	36.4	1.4e-07
lcl|SIZZ01000004.1_prot_TBR35927.1_3594	3	219	BAC0467zraR/hydH	441	8	242	44.7	24.3	1.2e-06
lcl|SIZZ01000004.1_prot_TBR35927.1_3594	34	113	BAC0095crdR	213	34	117	43.1	33.3	3.4e-06
lcl|SIZZ01000004.1_prot_TBR35934.1_3602	9	467	BAC0343silC	461	8	459	138.7	27.8	1.2e-34
lcl|SIZZ01000004.1_prot_TBR35934.1_3602	64	467	BAC0374srpC	470	62	465	138.7	31.4	1.2e-34
lcl|SIZZ01000004.1_prot_TBR35934.1_3602	12	466	BAC0109cusC/ylcB	457	11	457	132.1	28.4	1.2e-32
lcl|SIZZ01000004.1_prot_TBR35935.1_3603	3	249	BAC0645mdtA	413	29	226	56.2	27.2	6.6e-10
lcl|SIZZ01000004.1_prot_TBR35935.1_3603	63	373	BAC0460zneB/hmxB	385	92	340	48.5	22.4	1.4e-07
lcl|SIZZ01000004.1_prot_TBR35935.1_3603	57	276	BAC0204cnrB	395	94	265	37.4	21.4	0.00032
lcl|SIZZ01000004.1_prot_TBR35943.1_3611	1	1029	BAC0647mdtC	1026	1	1011	751.1	44.9	1.3e-218
lcl|SIZZ01000004.1_prot_TBR35943.1_3611	8	1038	BAC0646mdtB	1040	17	1034	724.2	41.5	1.7e-210
lcl|SIZZ01000004.1_prot_TBR35943.1_3611	8	1023	BAC0563acrD	1037	6	1024	314.7	26.8	3e-87
lcl|SIZZ01000004.1_prot_TBR35943.1_3611	16	1038	BAC0286nrsA	1054	22	1029	241.1	24.8	4.3e-65
lcl|SIZZ01000004.1_prot_TBR35943.1_3611	20	1022	BAC0119czcA	1063	22	1033	234.6	24.6	4e-63
lcl|SIZZ01000004.1_prot_TBR35943.1_3611	19	1028	BAC0130czrA	1051	21	1039	225.7	22.2	1.9e-60
lcl|SIZZ01000004.1_prot_TBR35943.1_3611	7	1031	BAC0107cusA/ybdE	1047	5	1046	217.6	24.5	5.1e-58
lcl|SIZZ01000004.1_prot_TBR35943.1_3611	7	1036	BAC0341silA	1048	5	1047	210.7	24	6.2e-56
lcl|SIZZ01000004.1_prot_TBR35943.1_3611	8	1022	BAC0127cznA	1019	10	1008	201.8	22.4	2.9e-53
lcl|SIZZ01000004.1_prot_TBR35943.1_3611	25	1022	BAC0267nczA	1043	27	1032	185.3	23.5	2.8e-48
lcl|SIZZ01000004.1_prot_TBR35943.1_3611	25	1021	BAC0549nccA	1076	27	1055	177.6	22.6	5.8e-46
lcl|SIZZ01000004.1_prot_TBR35943.1_3611	154	1021	BAC0203cnrA	1076	187	1055	161.4	23.5	4.3e-41
lcl|SIZZ01000004.1_prot_TBR35943.1_3611	154	331	BAC0545cnrA	304	122	299	70.9	27.5	7.7e-14
lcl|SIZZ01000004.1_prot_TBR35943.1_3611	154	331	BAC0546cnrA	304	122	299	70.9	27.5	7.7e-14
lcl|SIZZ01000004.1_prot_TBR35943.1_3611	154	331	BAC0544cnrA	304	122	299	69.7	27	1.7e-13
lcl|SIZZ01000004.1_prot_TBR35944.1_3612	8	1038	BAC0646mdtB	1040	17	1034	690.3	40.9	2.7e-200
lcl|SIZZ01000004.1_prot_TBR35944.1_3612	1	1029	BAC0647mdtC	1026	1	1011	688.3	42.1	1e-199
lcl|SIZZ01000004.1_prot_TBR35944.1_3612	8	1023	BAC0563acrD	1037	6	1024	311.2	27.9	3.4e-86
lcl|SIZZ01000004.1_prot_TBR35944.1_3612	15	1022	BAC0286nrsA	1054	21	1020	239.6	24.7	1.2e-64
lcl|SIZZ01000004.1_prot_TBR35944.1_3612	15	1028	BAC0130czrA	1051	17	1039	229.2	22.7	1.7e-61
lcl|SIZZ01000004.1_prot_TBR35944.1_3612	15	1022	BAC0119czcA	1063	17	1033	217.2	23.2	6.6e-58
lcl|SIZZ01000004.1_prot_TBR35944.1_3612	7	1022	BAC0107cusA/ybdE	1047	5	1035	204.1	23.8	5.8e-54
lcl|SIZZ01000004.1_prot_TBR35944.1_3612	7	1032	BAC0341silA	1048	5	1043	195.7	23.3	2.1e-51
lcl|SIZZ01000004.1_prot_TBR35944.1_3612	3	1028	BAC0267nczA	1043	6	1038	195.3	24.2	2.7e-51
lcl|SIZZ01000004.1_prot_TBR35944.1_3612	8	1022	BAC0127cznA	1019	10	1008	181.8	23.3	3.1e-47
lcl|SIZZ01000004.1_prot_TBR35944.1_3612	15	1021	BAC0549nccA	1076	17	1055	159.8	22	1.3e-40
lcl|SIZZ01000004.1_prot_TBR35944.1_3612	15	1021	BAC0203cnrA	1076	17	1055	158.3	21.9	3.6e-40
lcl|SIZZ01000004.1_prot_TBR35944.1_3612	159	331	BAC0545cnrA	304	127	299	71.6	30.1	4.5e-14
lcl|SIZZ01000004.1_prot_TBR35944.1_3612	159	331	BAC0546cnrA	304	127	299	71.6	30.1	4.5e-14
lcl|SIZZ01000004.1_prot_TBR35944.1_3612	159	331	BAC0543cnrA	304	127	299	70.5	30.1	1e-13
lcl|SIZZ01000004.1_prot_TBR35946.1_3614	31	153	BAC0169fpvA	815	152	271	42.7	24.2	1.2e-05
lcl|SIZZ01000004.1_prot_TBR35958.1_3628	11	610	BAC0168fptA	720	26	605	51.2	21.5	4e-08
lcl|SIZZ01000004.1_prot_TBR35958.1_3628	11	236	BAC0169fpvA	815	113	331	46.2	22.8	1.3e-06
lcl|SIZZ01000005.1_prot_TBR35758.1_3667	684	825	BAC0461zntA/yhhO	732	457	599	40	26.8	0.00017

## Sheet: D_terraeKACC_Unique MRG
Unique BacMet Metal Resistance Genes for Dyella terrae KACC 12748 (BioProject: PRJNA523522)
gene.name	Count
acn	2
acrD	4
actP	1
aioR/aoxR	1
arsC	2
arsM	3
bfrA	1
chrC	1
chrR	2
comR/ycfQ	1
copA	3
copB	1
copR	16
copS	4
corC	2
corD	1
corR	3
corR/coaR	1
corS	2
crdR	1
ctpV	2
cusR/ylcA	1
cutA	1
cutC	1
czcA	1
czcR	11
czcS	2
dmeF	1
dmeR	1
dsbC	1
fbpC	1
fecD	1
fecE	1
fpvA	2
G2alt	1
golS	1
irlR	4
irlS	1
klaC/telB	1
kmtR	1
mdtA	2
mdtB	3
mdtC	2
merA	4
mgtA	1
modB	2
modC	2
nikE	4
nmtR	2
nreB	1
nrsR	1
nrsS	5
pbrB/pbrC	2
pgpA/ltpgpA	1
pmrA	4
pmrB	2
pstA	1
pstB	1
pstC	1
pstS	1
recG	2
ruvB	2
silC	1
silR	1
smtB/ziaR	1
srpC	6
troB	1
tupC	6
wtpC	10
ybtP	5
yqjH	1
zitB/ybgR	1
znuC/yebM	4
zraR/hydH	10
zraS/hydG	2
zur/yjbK	1
TOTAL:	184

## Sheet: D_terraeKACC MRG List Hits
All annotated BacMet metal resistance genes for Dyella terrae KACC 12748 (BioProject: PRJNA523522)
ID	qstart	qend	sseqID	slen	sstart	send	bitscore	pident	evalue	gene.name	COUNT
lcl|SIZZ01000001.1_prot_TBR39575.1_991	2	910	BAC0003acn	943	6	939	1100.1	58.8	0	acn	2
lcl|SIZZ01000001.1_prot_TBR39866.1_1306	34	860	BAC0003acn	943	36	942	726.9	43.3	1.9e-211	acn
lcl|SIZZ01000001.1_prot_TBR39724.1_1152	1	1028	BAC0563acrD	1037	1	1028	900.2	47.4	1.5e-263	acrD	4
lcl|SIZZ01000001.1_prot_TBR40295.1_1781	1	1028	BAC0563acrD	1037	1	1030	1177.2	61.1	0	acrD
lcl|SIZZ01000001.1_prot_TBR40301.1_1789	3	1023	BAC0563acrD	1037	1	1023	746.5	40.7	2.8e-217	acrD
lcl|SIZZ01000004.1_prot_TBR35812.1_3473	3	1039	BAC0563acrD	1037	1	1027	714.9	40.3	9.2e-208	acrD
lcl|SIZZ01000001.1_prot_TBR39074.1_434	58	813	BAC0568actP	841	34	836	808.1	56.1	6.1e-236	actP	1
lcl|SIZZ01000003.1_prot_TBR36284.1_3351	559	679	BAC0022aioR/aoxR	442	3	122	52.8	35.2	1.3e-08	aioR/aoxR	1
lcl|SIZZ01000001.1_prot_TBR39583.1_999	1	116	BAC0585arsC	141	1	116	102.8	47.4	1.8e-24	arsC	2
lcl|SIZZ01000001.1_prot_TBR40525.1_2035	1	128	BAC0586arsC	131	1	131	86.7	36.4	1.5e-19	arsC
lcl|SIZZ01000001.1_prot_TBR39804.1_1243	44	144	BAC0035arsM	283	75	177	50.8	32.4	1.7e-08	arsM	3
lcl|SIZZ01000002.1_prot_TBR36587.1_2299	56	164	BAC0035arsM	283	71	178	60.1	33.9	2.9e-11	arsM
lcl|SIZZ01000003.1_prot_TBR36038.1_3077	44	162	BAC0035arsM	283	75	201	56.6	33.9	3.7e-10	arsM
lcl|SIZZ01000002.1_prot_TBR36527.1_2234	1	149	BAC0048bfrA	159	1	149	135.2	46.3	4.4e-34	bfrA	1
lcl|SIZZ01000001.1_prot_TBR40111.1_1576	74	192	BAC0547chrC	197	75	192	69.7	36.9	2.8e-14	chrC	1
lcl|SIZZ01000001.1_prot_TBR39653.1_1076	6	177	BAC0538chrR	186	10	178	84.7	30.2	8e-19	chrR	2
lcl|SIZZ01000001.1_prot_TBR39712.1_1140	5	179	BAC0538chrR	186	7	181	156.8	44.9	1.6e-40	chrR
lcl|SIZZ01000001.1_prot_TBR39898.1_1341	4	62	BAC0076comR/ycfQ	210	20	78	42	35.6	5.8e-06	comR/ycfQ	1
lcl|SIZZ01000001.1_prot_TBR39644.1_1067	95	789	BAC0620copA	727	11	723	309.7	31.2	6.7e-86	copA	3
lcl|SIZZ01000001.1_prot_TBR39859.1_1299	13	565	BAC0077copA	609	7	607	672.2	55.8	3.6e-195	copA
lcl|SIZZ01000001.1_prot_TBR40429.1_1928	79	211	BAC0619copA	564	46	179	57.8	30.2	2.9e-10	copA
lcl|SIZZ01000001.1_prot_TBR39858.1_1298	73	318	BAC0626copB	328	79	328	234.6	46.6	1.1e-63	copB	1
lcl|SIZZ01000001.1_prot_TBR38711.1_36	1	220	BAC0719copR	230	1	221	154.8	42.2	7.6e-40	copR	16
lcl|SIZZ01000001.1_prot_TBR38797.1_127	35	164	BAC0638copR	231	32	162	60.8	32.6	1.4e-11	copR
lcl|SIZZ01000001.1_prot_TBR39041.1_397	755	874	BAC0638copR	231	2	119	69.7	32.5	1.3e-13	copR
lcl|SIZZ01000001.1_prot_TBR39043.1_399	5	120	BAC0638copR	231	4	117	55.1	30.2	7.7e-10	copR
lcl|SIZZ01000001.1_prot_TBR39381.1_769	7	120	BAC0083copR	227	3	116	67.4	36	9.3e-14	copR
lcl|SIZZ01000001.1_prot_TBR39529.1_941	21	244	BAC0719copR	230	5	219	85.1	30.7	8.5e-19	copR
lcl|SIZZ01000001.1_prot_TBR39660.1_1083	19	130	BAC0638copR	231	1	108	55.8	31	5.5e-10	copR
lcl|SIZZ01000001.1_prot_TBR39885.1_1328	4	123	BAC0753copR	227	3	119	42.4	30.6	5.4e-06	copR
lcl|SIZZ01000001.1_prot_TBR40033.1_1486	1	224	BAC0083copR	227	1	227	172.2	44.7	4.7e-45	copR
lcl|SIZZ01000001.1_prot_TBR40170.1_1643	11	229	BAC0719copR	230	3	221	162.5	41.8	3.9e-42	copR
lcl|SIZZ01000001.1_prot_TBR40189.1_1663	4	119	BAC0638copR	231	3	116	72.4	33.6	2.8e-15	copR
lcl|SIZZ01000001.1_prot_TBR40473.1_1974	1	223	BAC0719copR	230	1	224	178.7	42	5.1e-47	copR
lcl|SIZZ01000002.1_prot_TBR36617.1_2332	8	226	BAC0719copR	230	3	219	145.6	36.4	4.9e-37	copR
lcl|SIZZ01000002.1_prot_TBR36931.1_2683	1	224	BAC0719copR	230	1	225	166.8	42.5	2e-43	copR
lcl|SIZZ01000002.1_prot_TBR37022.1_2777	55	134	BAC0083copR	227	32	115	49.3	30.2	3e-08	copR
lcl|SIZZ01000003.1_prot_TBR36268.1_3334	48	189	BAC0719copR	230	33	169	57.8	32.2	1.6e-10	copR
lcl|SIZZ01000001.1_prot_TBR39505.1_914	295	406	BAC0637copS	462	344	457	56.2	31.9	6.7e-10	copS	4
lcl|SIZZ01000001.1_prot_TBR40224.1_1701	354	456	BAC0720copS	477	367	474	45.8	30.3	1e-06	copS
lcl|SIZZ01000001.1_prot_TBR40292.1_1778	808	1035	BAC0637copS	462	229	455	86.3	31	1.8e-18	copS
lcl|SIZZ01000003.1_prot_TBR36194.1_3253	158	441	BAC0637copS	462	161	439	129.8	32.6	5.5e-32	copS
lcl|SIZZ01000001.1_prot_TBR39970.1_1417	276	517	BAC0088corC	292	39	283	121.3	31.7	2.2e-29	corC	2
lcl|SIZZ01000001.1_prot_TBR40129.1_1597	20	276	BAC0088corC	292	23	279	239.2	48.1	3.9e-65	corC
lcl|SIZZ01000002.1_prot_TBR36991.1_2746	11	127	BAC0644corD	125	9	125	146	53.8	2e-37	corD	1
lcl|SIZZ01000001.1_prot_TBR40226.1_1703	3	442	BAC0089corR	466	6	457	285	39.1	9.8e-79	corR	3
lcl|SIZZ01000001.1_prot_TBR40780.1_1985	2	123	BAC0089corR	466	6	128	52.4	30.7	6.1e-09	corR
lcl|SIZZ01000001.1_prot_TBR40519.1_2026	5	165	BAC0089corR	466	8	181	70.9	30.9	1.7e-14	corR
lcl|SIZZ01000003.1_prot_TBR36166.1_3222	3	104	BAC0090corR/coaR	370	6	114	62.4	38.5	7.8e-12	corR/coaR	1
lcl|SIZZ01000001.1_prot_TBR38912.1_254	142	447	BAC0091corS	491	187	487	111.7	30.8	1.5e-26	corS	2
lcl|SIZZ01000002.1_prot_TBR37024.1_2780	309	533	BAC0091corS	491	272	486	113.2	34.2	6.3e-27	corS
lcl|SIZZ01000001.1_prot_TBR40393.1_1889	1120	1237	BAC0095crdR	213	3	118	63.2	33.1	1.9e-11	crdR	1
lcl|SIZZ01000001.1_prot_TBR39339.1_725	148	715	BAC0101ctpV	770	166	757	256.1	31.9	7.9e-70	ctpV	2
lcl|SIZZ01000002.1_prot_TBR36622.1_2337	89	579	BAC0101ctpV	770	242	713	183.3	30.6	6.2e-48	ctpV
lcl|SIZZ01000003.1_prot_TBR36072.1_3113	51	120	BAC0111cusR/ylcA	227	44	113	44.3	32.9	1.6e-06	cusR/ylcA	1
lcl|SIZZ01000002.1_prot_TBR36770.1_2506	4	106	BAC0113cutA	112	10	112	86.7	38.8	1.2e-19	cutA	1
lcl|SIZZ01000001.1_prot_TBR39649.1_1072	7	243	BAC0114cutC	248	4	244	152.9	39.1	3.2e-39	cutC	1
lcl|SIZZ01000001.1_prot_TBR40051.1_1506	1	1020	BAC0119czcA	1063	1	1033	743	40.8	3e-216	czcA	1
lcl|SIZZ01000001.1_prot_TBR38911.1_253	3	221	BAC0125czcR	225	2	219	145.6	39.7	4.7e-37	czcR	11
lcl|SIZZ01000001.1_prot_TBR39453.1_857	10	122	BAC0125czcR	225	3	112	73.2	34.5	3.4e-15	czcR
lcl|SIZZ01000001.1_prot_TBR39514.1_924	6	119	BAC0125czcR	225	3	116	57	33	1.4e-10	czcR
lcl|SIZZ01000001.1_prot_TBR40187.1_1660	1892	2009	BAC0125czcR	225	3	117	63.5	33.1	2.1e-11	czcR
lcl|SIZZ01000001.1_prot_TBR40754.1_1664	9	124	BAC0125czcR	225	1	113	67.8	34.5	7.1e-14	czcR
lcl|SIZZ01000001.1_prot_TBR40318.1_1806	7	121	BAC0125czcR	225	2	112	72.8	34.5	5.7e-15	czcR
lcl|SIZZ01000001.1_prot_TBR40392.1_1888	12	150	BAC0125czcR	225	3	138	77	36.4	3.4e-16	czcR
lcl|SIZZ01000001.1_prot_TBR40491.1_1996	1076	1213	BAC0125czcR	225	2	135	76.3	32.4	2e-15	czcR
lcl|SIZZ01000002.1_prot_TBR37231.1_3003	4	108	BAC0125czcR	225	1	101	43.1	31.1	5.3e-06	czcR
lcl|SIZZ01000004.1_prot_TBR35806.1_3467	8	100	BAC0125czcR	225	127	219	51.6	35.1	2.2e-08	czcR
lcl|SIZZ01000004.1_prot_TBR35927.1_3594	1	134	BAC0125czcR	225	1	127	67	38.4	2.2e-13	czcR
lcl|SIZZ01000001.1_prot_TBR39886.1_1329	753	970	BAC0126czcS	476	237	461	78.6	32	3.4e-16	czcS	2
lcl|SIZZ01000002.1_prot_TBR36618.1_2333	665	880	BAC0126czcS	476	241	454	96.7	35.3	9.8e-22	czcS
lcl|SIZZ01000001.1_prot_TBR40650.1_338	1	315	BAC0132dmeF	382	28	361	310.5	56.4	1.6e-86	dmeF	1
lcl|SIZZ01000001.1_prot_TBR38987.1_339	1	88	BAC0475dmeR	90	1	90	84.7	46.7	3.8e-19	dmeR	1
lcl|SIZZ01000001.1_prot_TBR40282.1_1767	24	241	BAC0138dsbC	236	18	226	147.5	33	1.3e-37	dsbC	1
lcl|SIZZ01000001.1_prot_TBR40345.1_1834	10	249	BAC0162fbpC	356	11	247	122.9	32.7	3.8e-30	fbpC	1
lcl|SIZZ01000002.1_prot_TBR37290.1_2368	48	342	BAC0163fecD	318	37	318	174.5	41.2	1.5e-45	fecD	1
lcl|SIZZ01000002.1_prot_TBR36651.1_2369	17	255	BAC0164fecE	255	3	237	154.8	39	9.3e-40	fecE	1
lcl|SIZZ01000001.1_prot_TBR40709.1_1122	7	736	BAC0169fpvA	815	79	815	440.7	36.4	2.3e-125	fpvA	2
lcl|SIZZ01000002.1_prot_TBR36648.1_2365	52	170	BAC0169fpvA	815	165	273	54.7	30.3	3.7e-09	fpvA
lcl|SIZZ01000002.1_prot_TBR37064.1_2826	7	216	BAC0490G2alt	221	4	210	105.1	32.6	7.1e-25	G2alt	1
lcl|SIZZ01000001.1_prot_TBR39073.1_433	8	134	BAC0182golS	154	1	126	98.2	44.1	5.4e-23	golS	1
lcl|SIZZ01000001.1_prot_TBR38994.1_346	4	223	BAC0197irlR	229	2	217	132.1	36.8	5.5e-33	irlR	4
lcl|SIZZ01000001.1_prot_TBR39229.1_601	3	119	BAC0197irlR	229	2	115	70.5	35	1e-14	irlR
lcl|SIZZ01000001.1_prot_TBR40741.1_1553	1	236	BAC0197irlR	229	1	227	100.1	32.1	2.5e-23	irlR
lcl|SIZZ01000003.1_prot_TBR36271.1_3337	4	221	BAC0197irlR	229	3	219	188	46.8	8.5e-50	irlR
lcl|SIZZ01000003.1_prot_TBR36262.1_3327	179	462	BAC0198irlS	464	144	442	109	30.3	1.1e-25	irlS	1
lcl|SIZZ01000002.1_prot_TBR36909.1_2658	40	104	BAC0200klaC/telB	317	85	149	57.4	44.6	9.5e-11	klaC/telB	1
lcl|SIZZ01000001.1_prot_TBR39727.1_1155	9	75	BAC0201kmtR	130	21	87	52.4	49.3	7.4e-09	kmtR	1
lcl|SIZZ01000002.1_prot_TBR36896.1_2643	26	371	BAC0645mdtA	413	37	389	216.1	39.9	4.7e-58	mdtA	2
lcl|SIZZ01000003.1_prot_TBR36207.1_3269	51	418	BAC0645mdtA	413	49	412	255.8	40	6e-70	mdtA
lcl|SIZZ01000003.1_prot_TBR36208.1_3270	2	1071	BAC0646mdtB	1040	11	1039	971.1	50.9	7.2e-285	mdtB	3
lcl|SIZZ01000003.1_prot_TBR36209.1_3271	7	1023	BAC0646mdtB	1040	16	1031	776.2	44	3.3e-226	mdtB
lcl|SIZZ01000004.1_prot_TBR35944.1_3612	8	1038	BAC0646mdtB	1040	17	1034	690.3	40.9	2.7e-200	mdtB
lcl|SIZZ01000002.1_prot_TBR36897.1_2644	6	1024	BAC0647mdtC	1026	6	1019	872.1	48.3	4.4e-255	mdtC	2
lcl|SIZZ01000004.1_prot_TBR35943.1_3611	1	1029	BAC0647mdtC	1026	1	1011	751.1	44.9	1.3e-218	mdtC
lcl|SIZZ01000001.1_prot_TBR39232.1_604	3	472	BAC0649merA	568	100	558	203.4	30.5	4e-54	merA	4
lcl|SIZZ01000001.1_prot_TBR39350.1_736	9	246	BAC0648merA	460	103	349	124.8	31	1.7e-30	merA
lcl|SIZZ01000001.1_prot_TBR39949.1_1396	3	430	BAC0653merA	562	98	529	165.6	30.2	8.7e-43	merA
lcl|SIZZ01000002.1_prot_TBR36803.1_2543	137	593	BAC0224merA	631	173	626	211.1	30.2	2.4e-56	merA
lcl|SIZZ01000002.1_prot_TBR36674.1_2395	35	885	BAC0087mgtA	898	51	896	919.5	56.3	2e-269	mgtA	1
lcl|SIZZ01000001.1_prot_TBR39510.1_920	67	266	BAC0599modB	233	20	219	126.3	37	3.8e-31	modB	2
lcl|SIZZ01000001.1_prot_TBR39511.1_921	57	268	BAC0599modB	233	18	233	116.3	35.9	3.7e-28	modB
lcl|SIZZ01000001.1_prot_TBR39147.1_510	30	169	BAC0611modC	352	17	160	57	30.7	2.1e-10	modC	2
lcl|SIZZ01000002.1_prot_TBR36603.1_2316	35	222	BAC0611modC	352	26	213	86.7	31.2	2.8e-19	modC
lcl|SIZZ01000001.1_prot_TBR40038.1_1492	22	231	BAC0274nikE	268	18	231	114.4	36.3	1.3e-27	nikE	4
lcl|SIZZ01000001.1_prot_TBR40047.1_1501	16	227	BAC0274nikE	268	27	233	73.2	30	3.3e-15	nikE
lcl|SIZZ01000001.1_prot_TBR40172.1_1645	27	225	BAC0274nikE	268	27	231	108.2	37.7	8.6e-26	nikE
lcl|SIZZ01000002.1_prot_TBR37318.1_2649	3	224	BAC0274nikE	268	2	232	110.5	32.3	1.7e-26	nikE
lcl|SIZZ01000001.1_prot_TBR40724.1_1326	8	69	BAC0281nmtR	120	22	83	43.9	38.7	1.1e-06	nmtR	2
lcl|SIZZ01000003.1_prot_TBR36362.1_3073	5	89	BAC0281nmtR	120	17	105	53.1	40.4	1.4e-09	nmtR
lcl|SIZZ01000002.1_prot_TBR36785.1_2522	38	395	BAC0285nreB	416	34	400	215.3	39.3	9e-58	nreB	1
lcl|SIZZ01000001.1_prot_TBR39558.1_972	50	116	BAC0288nrsR	234	49	115	42.4	32.8	5.4e-06	nrsR	1
lcl|SIZZ01000001.1_prot_TBR38993.1_345	191	404	BAC0289nrsS	454	222	441	129.8	35	5e-32	nrsS	5
lcl|SIZZ01000001.1_prot_TBR40092.1_1552	506	728	BAC0289nrsS	454	217	442	95.1	33.2	2.4e-21	nrsS
lcl|SIZZ01000001.1_prot_TBR40315.1_1803	546	782	BAC0289nrsS	454	222	445	98.6	32.5	3.5e-22	nrsS
lcl|SIZZ01000002.1_prot_TBR37333.1_2834	244	471	BAC0289nrsS	454	226	454	92.8	30.3	9.8e-21	nrsS
lcl|SIZZ01000004.1_prot_TBR35992.1_3527	791	1006	BAC0289nrsS	454	226	445	81.3	31.4	5.6e-17	nrsS
lcl|SIZZ01000001.1_prot_TBR38890.1_232	93	179	BAC0299pbrB/pbrC	358	97	181	43.5	38.7	2.1e-06	pbrB/pbrC	2
lcl|SIZZ01000001.1_prot_TBR39039.1_395	9	152	BAC0299pbrB/pbrC	358	203	342	86.7	42.4	1.9e-19	pbrB/pbrC
lcl|SIZZ01000001.1_prot_TBR40364.1_1854	53	98	BAC0311pgpA/ltpgpA	1548	1303	1355	43.1	43.4	6.9e-06	pgpA/ltpgpA	1
lcl|SIZZ01000001.1_prot_TBR39740.1_1171	1	221	BAC0487pmrA	222	1	221	171.4	40.3	7.8e-45	pmrA	4
lcl|SIZZ01000002.1_prot_TBR36816.1_2557	5	225	BAC0487pmrA	222	3	214	102.8	32.1	3.5e-24	pmrA
lcl|SIZZ01000003.1_prot_TBR36195.1_3254	1	219	BAC0487pmrA	222	1	218	169.1	41.6	4e-44	pmrA
lcl|SIZZ01000003.1_prot_TBR36263.1_3328	1	218	BAC0487pmrA	222	1	216	183.7	44.5	1.5e-48	pmrA
lcl|SIZZ01000001.1_prot_TBR39741.1_1172	172	459	BAC0488pmrB	364	71	352	134	35.3	3e-33	pmrB	2
lcl|SIZZ01000001.1_prot_TBR40034.1_1487	154	457	BAC0488pmrB	364	37	336	110.9	32.1	2.7e-26	pmrB
lcl|SIZZ01000001.1_prot_TBR38848.1_185	9	286	BAC0315pstA	296	22	294	247.7	47.9	1.1e-67	pstA	1
lcl|SIZZ01000001.1_prot_TBR38847.1_184	21	271	BAC0316pstB	257	7	257	369	69.7	3.1e-104	pstB	1
lcl|SIZZ01000001.1_prot_TBR38849.1_186	21	336	BAC0317pstC	319	14	317	308.5	53.8	6.3e-86	pstC	1
lcl|SIZZ01000001.1_prot_TBR40636.1_187	6	336	BAC0318pstS	346	9	338	331.3	50	9e-93	pstS	1
lcl|SIZZ01000001.1_prot_TBR38820.1_153	532	969	BAC0356recG	691	199	643	222.6	34.7	1.5e-59	recG	2
lcl|SIZZ01000002.1_prot_TBR36879.1_2624	19	694	BAC0356recG	691	8	682	812.4	62.4	2.8e-237	recG
lcl|SIZZ01000002.1_prot_TBR36780.1_2517	6	399	BAC0293ruvB	397	3	397	446	56.2	5.7e-127	ruvB	2
lcl|SIZZ01000002.1_prot_TBR37056.1_2817	1	344	BAC0355ruvB	352	1	347	460.7	67.1	1e-131	ruvB
lcl|SIZZ01000002.1_prot_TBR36944.1_2696	5	466	BAC0343silC	461	8	459	178.7	30.1	1.1e-46	silC	1
lcl|SIZZ01000001.1_prot_TBR39450.1_854	1116	1235	BAC0347silR	228	3	123	57.4	33.6	9.2e-10	silR	1
lcl|SIZZ01000003.1_prot_TBR36224.1_3287	11	88	BAC0366smtB/ziaR	122	36	112	43.5	35.9	2.5e-06	smtB/ziaR	1
lcl|SIZZ01000001.1_prot_TBR39154.1_517	16	475	BAC0374srpC	470	5	467	146.4	30	6.2e-37	srpC	6
lcl|SIZZ01000001.1_prot_TBR40294.1_1780	6	461	BAC0374srpC	470	3	466	350.5	46	2e-98	srpC
lcl|SIZZ01000001.1_prot_TBR40766.1_1788	14	456	BAC0374srpC	470	13	465	238.4	33.9	1.1e-64	srpC
lcl|SIZZ01000003.1_prot_TBR36275.1_3341	17	473	BAC0374srpC	470	14	466	186.8	31.2	4e-49	srpC
lcl|SIZZ01000004.1_prot_TBR35989.1_3474	24	479	BAC0374srpC	470	8	470	207.6	32.1	2.2e-55	srpC
lcl|SIZZ01000004.1_prot_TBR35934.1_3602	64	467	BAC0374srpC	470	62	465	138.7	31.4	1.2e-34	srpC
lcl|SIZZ01000003.1_prot_TBR36309.1_3380	11	255	BAC0400troB	266	8	239	113.6	33.9	2.4e-27	troB	1
lcl|SIZZ01000001.1_prot_TBR38799.1_129	2	209	BAC0607tupC	214	3	207	101.3	31	1.4e-23	tupC	6
lcl|SIZZ01000001.1_prot_TBR38959.1_305	6	222	BAC0607tupC	214	7	209	132.5	35.9	6.1e-33	tupC
lcl|SIZZ01000001.1_prot_TBR40747.1_1592	6	212	BAC0607tupC	214	8	212	104.4	31.9	1.7e-24	tupC
lcl|SIZZ01000001.1_prot_TBR40242.1_1720	6	210	BAC0607tupC	214	3	207	84	30.1	2.3e-18	tupC
lcl|SIZZ01000003.1_prot_TBR36230.1_3293	12	223	BAC0607tupC	214	3	209	100.5	30.1	2.5e-23	tupC
lcl|SIZZ01000003.1_prot_TBR36239.1_3302	2	210	BAC0607tupC	214	3	207	112.8	33.8	3.6e-27	tupC
lcl|SIZZ01000001.1_prot_TBR39029.1_383	462	571	BAC0604wtpC	344	106	215	47.4	35.4	7.4e-07	wtpC	10
lcl|SIZZ01000001.1_prot_TBR39165.1_532	32	230	BAC0604wtpC	344	16	209	114	35.5	1.6e-27	wtpC
lcl|SIZZ01000001.1_prot_TBR39458.1_863	392	537	BAC0604wtpC	344	26	174	67.4	32	4.2e-13	wtpC
lcl|SIZZ01000001.1_prot_TBR39509.1_919	3	343	BAC0604wtpC	344	2	336	192.6	37.9	5.7e-51	wtpC
lcl|SIZZ01000001.1_prot_TBR40067.1_1526	34	228	BAC0604wtpC	344	26	227	101.3	33.7	1.4e-23	wtpC
lcl|SIZZ01000001.1_prot_TBR40235.1_1713	1	223	BAC0604wtpC	344	1	214	118.6	33.3	6.5e-29	wtpC
lcl|SIZZ01000002.1_prot_TBR36647.1_2364	22	314	BAC0604wtpC	344	18	305	193.7	38.3	2.4e-51	wtpC
lcl|SIZZ01000002.1_prot_TBR36870.1_2615	30	258	BAC0604wtpC	344	21	245	120.6	34.7	2e-29	wtpC
lcl|SIZZ01000002.1_prot_TBR37131.1_2898	1	236	BAC0604wtpC	344	1	234	139	36	4.7e-35	wtpC
lcl|SIZZ01000003.1_prot_TBR36387.1_3332	1	216	BAC0604wtpC	344	1	210	108.6	31.8	6.3e-26	wtpC
lcl|SIZZ01000001.1_prot_430	3	126	BAC0432ybtP	600	360	483	120.6	46	9.3e-30	ybtP	5
lcl|SIZZ01000001.1_prot_TBR39168.1_536	71	579	BAC0432ybtP	600	62	575	175.6	30.2	1.1e-45	ybtP
lcl|SIZZ01000001.1_prot_TBR39648.1_1071	21	583	BAC0432ybtP	600	16	575	224.6	32.4	2.1e-60	ybtP
lcl|SIZZ01000001.1_prot_TBR40715.1_1190	298	599	BAC0432ybtP	600	286	577	199.5	39.8	7.5e-53	ybtP
lcl|SIZZ01000001.1_prot_TBR40287.1_1773	13	587	BAC0432ybtP	600	19	594	214.2	32.2	2.8e-57	ybtP
lcl|SIZZ01000001.1_prot_TBR39854.1_1294	9	255	BAC0452yqjH	254	11	251	158.3	37.2	8.3e-41	yqjH	1
lcl|SIZZ01000001.1_prot_TBR38900.1_242	35	320	BAC0459zitB/ybgR	313	19	300	219.9	44.3	2.8e-59	zitB/ybgR	1
lcl|SIZZ01000001.1_prot_TBR39437.1_837	36	204	BAC0465znuC/yebM	251	35	186	69.7	32.6	7.8e-14	znuC/yebM	4
lcl|SIZZ01000001.1_prot_TBR39546.1_959	311	501	BAC0465znuC/yebM	251	3	189	92.8	33.5	1e-20	znuC/yebM
lcl|SIZZ01000001.1_prot_TBR40260.1_1742	322	499	BAC0465znuC/yebM	251	4	180	83.2	31.9	7e-18	znuC/yebM
lcl|SIZZ01000002.1_prot_TBR36941.1_2693	312	489	BAC0465znuC/yebM	251	4	180	92.4	32.8	1.3e-20	znuC/yebM
lcl|SIZZ01000001.1_prot_TBR40691.1_904	8	437	BAC0467zraR/hydH	441	8	441	270	39.4	3.3e-74	zraR/hydH	10
lcl|SIZZ01000001.1_prot_TBR40163.1_1634	9	112	BAC0467zraR/hydH	441	8	111	73.6	35.6	1.9e-15	zraR/hydH
lcl|SIZZ01000002.1_prot_TBR37023.1_2779	6	462	BAC0467zraR/hydH	441	8	441	314.3	39.8	1.6e-87	zraR/hydH
lcl|SIZZ01000002.1_prot_TBR37196.1_2964	7	471	BAC0467zraR/hydH	441	5	441	273.5	38	3.2e-75	zraR/hydH
lcl|SIZZ01000002.1_prot_TBR37213.1_2984	4	123	BAC0467zraR/hydH	441	5	119	62.4	35	3.1e-12	zraR/hydH
lcl|SIZZ01000002.1_prot_TBR37225.1_2996	4	119	BAC0467zraR/hydH	441	8	121	79.3	37.1	2.2e-17	zraR/hydH
lcl|SIZZ01000003.1_prot_TBR36098.1_3143	4	449	BAC0467zraR/hydH	441	7	439	307	43	2.5e-85	zraR/hydH
lcl|SIZZ01000003.1_prot_TBR36218.1_3281	29	127	BAC0467zraR/hydH	441	32	133	55.1	34.3	8.9e-10	zraR/hydH
lcl|SIZZ01000003.1_prot_TBR36352.1_3426	30	430	BAC0467zraR/hydH	441	29	435	276.6	38.1	3.5e-76	zraR/hydH
lcl|SIZZ01000004.1_prot_TBR35878.1_3545	185	425	BAC0467zraR/hydH	441	140	371	132.5	36.4	9.7e-33	zraR/hydH
lcl|SIZZ01000002.1_prot_TBR37326.1_2778	127	374	BAC0468zraS/hydG	465	227	462	105.5	30.3	1.2e-24	zraS/hydG	2
lcl|SIZZ01000003.1_prot_TBR36097.1_3142	124	336	BAC0468zraS/hydG	465	251	461	111.7	32.7	1.1e-26	zraS/hydG
lcl|SIZZ01000001.1_prot_TBR38897.1_239	36	167	BAC0470zur/yjbK	171	14	146	124.8	46.6	6.5e-31	zur/yjbK	1

## Sheet: D_jiangning_Diamond Best Hits
Best DIAMOND hits for Dyella jiangningensis FCAV SCS01 (BioProject PRJNA386033)
qseqid	qstart	qend	sseqid	slen	sstart	send	bitscore	pident	evalue
lcl|NZ_NFZS01000001.1_prot_WP_172461678.1_12	868	986	BAC0752copS	445	326	438	53.1	34.4	1.6e-08
lcl|NZ_NFZS01000001.1_prot_WP_111982923.1_53	6	120	BAC0197irlR	229	1	112	50.8	31.6	1.8e-08
lcl|NZ_NFZS01000001.1_prot_59	3	915	BAC0563acrD	1037	1	905	608.2	39.5	1.2e-175
lcl|NZ_NFZS01000001.1_prot_WP_111980506.1_63	4	106	BAC0753copR	227	126	227	60.5	35	4.6e-11
lcl|NZ_NFZS01000001.1_prot_WP_111980515.1_74	668	785	BAC0433ybtQ	600	457	568	58.2	31.9	3.5e-10
lcl|NZ_NFZS01000001.1_prot_WP_111980520.1_81	124	332	BAC0468zraS/hydG	465	251	456	101.7	31.6	1.2e-23
lcl|NZ_NFZS01000001.1_prot_WP_111980521.1_82	1	454	BAC0467zraR/hydH	441	1	439	313.9	43.3	2.1e-87
lcl|NZ_NFZS01000001.1_prot_WP_111980569.1_140	44	148	BAC0035arsM	283	75	182	59.7	35.2	4.4e-11
lcl|NZ_NFZS01000001.1_prot_WP_111980600.1_179	22	339	BAC0604wtpC	344	18	325	195.7	36.4	6.4e-52
lcl|NZ_NFZS01000001.1_prot_WP_111982945.1_230	5	83	BAC0281nmtR	120	20	98	62.8	43	1.7e-12
lcl|NZ_NFZS01000001.1_prot_WP_172461686.1_238	172	441	BAC0637copS	462	163	439	121.3	33.2	1.9e-29
lcl|NZ_NFZS01000001.1_prot_WP_111980653.1_239	1	221	BAC0487pmrA	222	1	221	161	40.7	1.1e-41
lcl|NZ_NFZS01000001.1_prot_WP_111980699.1_292	12	112	BAC0071cmtR	118	11	115	41.6	32.1	9.9e-06
lcl|NZ_NFZS01000001.1_prot_WP_111982953.1_301	1	214	BAC0440yfeB	296	1	220	99	30.8	7.1e-23
lcl|NZ_NFZS01000001.1_prot_WP_111980714.1_311	1	211	BAC0604wtpC	344	1	210	104.8	30.7	9.9e-25
lcl|NZ_NFZS01000001.1_prot_WP_111980794.1_397	10	101	BAC0113cutA	112	16	107	84	44.6	7.8e-19
lcl|NZ_NFZS01000001.1_prot_WP_111980812.1_422	37	182	BAC0048bfrA	159	7	146	59.7	31.3	2.9e-11
lcl|NZ_NFZS01000001.1_prot_WP_111980825.1_438	30	431	BAC0467zraR/hydH	441	29	435	275	39	1e-75
lcl|NZ_NFZS01000001.1_prot_WP_111982967.1_469	5	225	BAC0487pmrA	222	3	214	104.4	32.6	1.2e-24
lcl|NZ_NFZS01000001.1_prot_WP_111980905.1_527	33	258	BAC0604wtpC	344	19	245	123.2	33.9	3.1e-30
lcl|NZ_NFZS01000001.1_prot_WP_111980912.1_536	20	703	BAC0356recG	691	8	688	840.5	64.2	9.6e-246
lcl|NZ_NFZS01000001.1_prot_WP_172461793.1_555	41	369	BAC0645mdtA	413	60	390	182.2	35.6	7.5e-48
lcl|NZ_NFZS01000001.1_prot_WP_111980928.1_556	1	1028	BAC0647mdtC	1026	1	1022	877.9	48.4	7.9e-257
lcl|NZ_NFZS01000001.1_prot_WP_111980933.1_561	2	224	BAC0162fbpC	356	9	226	116.3	32.1	3.1e-28
lcl|NZ_NFZS01000001.1_prot_WP_019466282.1_583	1	224	BAC0719copR	230	1	225	164.1	41.2	1.3e-42
lcl|NZ_NFZS01000001.1_prot_WP_111980954.1_584	214	382	BAC0289nrsS	454	222	398	61.6	30	1.7e-11
lcl|NZ_NFZS01000001.1_prot_WP_111982975.1_595	155	787	BAC0101ctpV	770	118	762	332.8	35	7.3e-93
lcl|NZ_NFZS01000001.1_prot_WP_111980970.1_601	312	489	BAC0465znuC/yebM	251	4	180	90.5	32.8	5e-20
lcl|NZ_NFZS01000001.1_prot_WP_111980993.1_628	80	212	BAC0077copA	609	48	180	52	30.2	1.6e-08
lcl|NZ_NFZS01000001.1_prot_WP_111981031.1_674	39	223	BAC0400troB	266	20	217	75.5	31	1.2e-15
lcl|NZ_NFZS01000001.1_prot_WP_111982984.1_699	10	229	BAC0162fbpC	356	11	227	115.2	33.3	8.1e-28
lcl|NZ_NFZS01000001.1_prot_WP_111982986.1_724	7	141	BAC0125czcR	225	2	132	68.9	30.9	8.2e-14
lcl|NZ_NFZS01000001.1_prot_WP_111981076.1_727	551	788	BAC0289nrsS	454	222	446	102.8	33.1	1.9e-23
lcl|NZ_NFZS01000001.1_prot_WP_111981091.1_744	54	721	BAC0169fpvA	815	139	815	430.6	37.8	2.3e-122
lcl|NZ_NFZS01000001.1_prot_WP_111981096.1_749	1059	1177	BAC0719copR	230	1	116	67	34.5	1.1e-12
lcl|NZ_NFZS01000001.1_prot_WP_111981101.1_754	29	567	BAC0433ybtQ	600	35	576	208	31.1	2e-55
lcl|NZ_NFZS01000001.1_prot_WP_111981106.1_761	2	245	BAC0138dsbC	236	5	228	142.1	32.1	5.7e-36
lcl|NZ_NFZS01000001.1_prot_WP_111981119.1_776	324	501	BAC0465znuC/yebM	251	4	180	87.4	33	3.7e-19
lcl|NZ_NFZS01000001.1_prot_WP_038615423.1_803	1	223	BAC0604wtpC	344	1	214	117.9	33.3	1.1e-28
lcl|NZ_NFZS01000001.1_prot_WP_111981152.1_813	3	442	BAC0089corR	466	6	457	279.3	38.6	5.4e-77
lcl|NZ_NFZS01000001.1_prot_WP_111981154.1_815	357	456	BAC0091corS	491	388	487	75.1	38	1.6e-15
lcl|NZ_NFZS01000001.1_prot_WP_111981160.1_824	122	423	BAC0091corS	491	181	487	116.3	30.4	5.9e-28
lcl|NZ_NFZS01000001.1_prot_WP_111981161.1_825	17	249	BAC0083copR	227	2	224	97.1	31.4	2.1e-22
lcl|NZ_NFZS01000001.1_prot_WP_038620857.1_902	1	236	BAC0604wtpC	344	1	234	140.6	36.4	1.6e-35
lcl|NZ_NFZS01000001.1_prot_WP_111983010.1_964	130	468	BAC0089corR	466	144	458	265.4	43.1	8.5e-73
lcl|NZ_NFZS01000001.1_prot_WP_038620666.1_984	5	130	BAC0111cusR/ylcA	227	1	121	67.4	30.2	9.7e-14
lcl|NZ_NFZS01000001.1_prot_WP_111981301.1_986	403	514	BAC0468zraS/hydG	465	376	458	53.9	33	5.4e-09
lcl|NZ_NFZS01000001.1_prot_WP_111981334.1_1025	12	165	BAC0125czcR	225	3	159	82	37.3	1.1e-17
lcl|NZ_NFZS01000001.1_prot_WP_172461723.1_1026	1133	1249	BAC0095crdR	213	4	118	61.2	33.3	7.2e-11
lcl|NZ_NFZS01000001.1_prot_WP_111981341.1_1033	4	119	BAC0467zraR/hydH	441	8	121	77.4	36.2	8.4e-17
lcl|NZ_NFZS01000001.1_prot_WP_111981342.1_1034	408	520	BAC0468zraS/hydG	465	373	458	53.9	30.1	5.4e-09
lcl|NZ_NFZS01000001.1_prot_WP_111981348.1_1040	2	108	BAC0467zraR/hydH	441	4	107	42.4	30.6	9e-06
lcl|NZ_NFZS01000001.1_prot_WP_111981412.1_1132	9	157	BAC0137dsbB	176	12	158	53.9	32.5	1.4e-09
lcl|NZ_NFZS01000001.1_prot_WP_111981489.1_1217	5	123	BAC0125czcR	225	4	120	49.7	32.2	3.9e-08
lcl|NZ_NFZS01000001.1_prot_WP_111981504.1_1232	3	527	sp|P0A5B9|DNAK_MYCTU	625	5	531	316.2	37	5e-88
lcl|NZ_NFZS01000001.1_prot_WP_111981561.1_1298	17	262	BAC0608modE	262	16	260	140.6	38.7	1.8e-35
lcl|NZ_NFZS01000001.1_prot_WP_026635939.1_1337	35	164	BAC0638copR	231	32	162	60.8	32.6	1.4e-11
lcl|NZ_NFZS01000001.1_prot_WP_111981623.1_1339	1	215	BAC0465znuC/yebM	251	4	204	96.7	30.7	3.4e-22
lcl|NZ_NFZS01000001.1_prot_WP_111981695.1_1367	534	971	BAC0356recG	691	199	643	221.1	35.2	4.5e-59
lcl|NZ_NFZS01000001.1_prot_WP_111981709.1_1375	13	574	BAC0077copA	609	7	607	686.4	57.9	1.9e-199
lcl|NZ_NFZS01000001.1_prot_WP_202864069.1_1376	50	247	BAC0718copB	326	126	325	222.6	54	3.3e-60
lcl|NZ_NFZS01000001.1_prot_WP_111981728.1_1381	7	258	BAC0452yqjH	254	9	254	157.1	36.1	1.8e-40
lcl|NZ_NFZS01000001.1_prot_WP_111981806.1_1408	369	528	BAC0274nikE	268	33	195	53.9	32.2	4.8e-09
lcl|NZ_NFZS01000001.1_prot_WP_111981860.1_1422	7	237	BAC0197irlR	229	3	221	122.9	35.3	3.6e-30
lcl|NZ_NFZS01000001.1_prot_WP_111981925.1_1455	855	970	BAC0348silS	497	374	492	53.5	30.8	1.2e-08
lcl|NZ_NFZS01000001.1_prot_WP_111981956.1_1464	1	86	BAC0682merR1	132	1	78	57	32.6	3.3e-10
lcl|NZ_NFZS01000001.1_prot_WP_111982113.1_1515	9	253	BAC0598modA	269	25	269	110.2	31.5	2.5e-26
lcl|NZ_NFZS01000001.1_prot_WP_111982115.1_1516	14	219	BAC0599modB	233	20	218	142.5	41.7	4e-36
lcl|NZ_NFZS01000001.1_prot_WP_202864043.1_1517	8	362	BAC0611modC	352	2	352	206.5	36.6	3.6e-55
lcl|NZ_NFZS01000001.1_prot_WP_111982137.1_1530	21	271	BAC0316pstB	257	7	257	380.2	71.7	1.4e-107
lcl|NZ_NFZS01000001.1_prot_WP_111982138.1_1531	10	287	BAC0315pstA	296	22	294	246.1	47.5	3.3e-67
lcl|NZ_NFZS01000001.1_prot_WP_111982139.1_1532	25	338	BAC0317pstC	319	16	317	300.1	52.5	2.2e-83
lcl|NZ_NFZS01000001.1_prot_WP_111983061.1_1533	1	338	BAC0318pstS	346	4	338	326.2	48.8	2.9e-91
lcl|NZ_NFZS01000001.1_prot_WP_111982155.1_1542	174	461	BAC0488pmrB	364	71	352	116.3	30.8	6.3e-28
lcl|NZ_NFZS01000001.1_prot_WP_111982157.1_1543	1	218	BAC0487pmrA	222	1	218	171	41.3	1e-44
lcl|NZ_NFZS01000001.1_prot_WP_111982173.1_1551	11	72	BAC0557ycnK	190	2	63	43.9	37.1	2.2e-06
lcl|NZ_NFZS01000001.1_prot_WP_111982179.1_1554	3	158	BAC0538chrR	186	7	166	67.4	33.1	1.3e-13
lcl|NZ_NFZS01000001.1_prot_WP_111982221.1_1583	50	182	BAC0299pbrB/pbrC	358	41	181	41.6	32.2	8e-06
lcl|NZ_NFZS01000001.1_prot_WP_111982227.1_1589	1	1041	BAC0130czrA	1051	1	1032	620.2	37.1	3.1e-179
lcl|NZ_NFZS01000001.1_prot_WP_111982230.1_1592	1	228	BAC0719copR	230	1	227	200.3	46.3	1.6e-53
lcl|NZ_NFZS01000001.1_prot_WP_111982232.1_1594	27	165	BAC0470zur/yjbK	171	7	146	126.3	45	2.2e-31
lcl|NZ_NFZS01000001.1_prot_WP_111982234.1_1596	39	321	BAC0459zitB/ybgR	313	19	299	235.3	44.7	6.5e-64
lcl|NZ_NFZS01000001.1_prot_WP_111982245.1_1607	3	223	BAC0125czcR	225	2	219	140.6	38.5	1.5e-35
lcl|NZ_NFZS01000001.1_prot_WP_111982246.1_1608	155	448	BAC0091corS	491	200	487	109.8	31.6	5.8e-26
lcl|NZ_NFZS01000001.1_prot_WP_172461802.1_1635	114	610	BAC0433ybtQ	600	100	589	186	30.8	8.6e-49
lcl|NZ_NFZS01000001.1_prot_WP_111982283.1_1656	8	138	BAC0182golS	154	1	130	100.5	43.5	1.1e-23
lcl|NZ_NFZS01000001.1_prot_WP_111983073.1_1657	49	809	BAC0568actP	841	34	841	813.5	56.3	1.4e-237
lcl|NZ_NFZS01000001.1_prot_WP_111982307.1_1682	46	272	BAC0610modB	229	2	229	110.9	33.2	1.6e-26
lcl|NZ_NFZS01000001.1_prot_WP_111982308.1_1683	61	268	BAC0599modB	233	18	222	119.4	33.7	4.5e-29
lcl|NZ_NFZS01000001.1_prot_WP_111982309.1_1684	3	338	BAC0604wtpC	344	2	332	195.7	36.5	6.5e-52
lcl|NZ_NFZS01000001.1_prot_WP_111982416.1_1806	6	181	BAC0538chrR	186	10	178	90.5	32.8	1.5e-20
lcl|NZ_NFZS01000001.1_prot_WP_111982419.1_1810	5	214	BAC0114cutC	248	3	210	157.1	42.4	1.7e-40
lcl|NZ_NFZS01000001.1_prot_WP_111982420.1_1811	20	582	BAC0432ybtP	600	16	575	223	31.6	6e-60
lcl|NZ_NFZS01000001.1_prot_WP_111982430.1_1822	4	461	BAC0126czcS	476	10	453	259.6	35.1	4.6e-71
lcl|NZ_NFZS01000001.1_prot_WP_111982431.1_1823	1	223	BAC0125czcR	225	1	223	298.1	65.5	5.7e-83
lcl|NZ_NFZS01000001.1_prot_WP_111982435.1_1826	20	476	BAC0374srpC	470	12	466	167.5	30.7	2.6e-43
lcl|NZ_NFZS01000001.1_prot_WP_111982492.1_1857	1	219	BAC0197irlR	229	1	219	175.3	45	5.4e-46
lcl|NZ_NFZS01000001.1_prot_WP_111982500.1_1861	1	1017	BAC0127cznA	1019	1	1009	840.5	45.7	1.4e-245
lcl|NZ_NFZS01000001.1_prot_WP_111982532.1_1877	9	309	BAC0132dmeF	382	38	365	313.5	56.7	1.9e-87
lcl|NZ_NFZS01000001.1_prot_WP_111982534.1_1878	1	88	BAC0475dmeR	90	1	90	81.3	47.8	4.2e-18
lcl|NZ_NFZS01000001.1_prot_WP_111982546.1_1884	16	237	BAC0719copR	230	1	219	93.2	31.7	3e-21
lcl|NZ_NFZS01000001.1_prot_WP_111982548.1_1885	225	451	BAC0091corS	491	270	487	100.5	31.3	3.6e-23
lcl|NZ_NFZS01000001.1_prot_WP_111982576.1_1901	11	107	BAC0083copR	227	128	224	54.7	32	3.6e-09
lcl|NZ_NFZS01000001.1_prot_WP_111982606.1_1919	1	321	BAC0089corR	466	144	463	253.8	45.4	1.8e-69
lcl|NZ_NFZS01000001.1_prot_WP_111982688.1_1971	3	1025	BAC0563acrD	1037	1	1023	731.5	40.7	9.4e-213
lcl|NZ_NFZS01000001.1_prot_WP_111982690.1_1972	9	463	BAC0374srpC	470	6	470	253.8	34.4	2.6e-69
lcl|NZ_NFZS01000001.1_prot_WP_111982704.1_1979	5	446	BAC0651merA	547	86	526	253.1	31.9	4.3e-69
lcl|NZ_NFZS01000001.1_prot_WP_172461775.1_2004	2	161	BAC0374srpC	470	307	466	73.6	31.9	1.7e-15
lcl|NZ_NFZS01000001.1_prot_WP_191983774.1_2005	38	99	BAC0752copS	445	368	433	41.6	37.9	6e-06
lcl|NZ_NFZS01000001.1_prot_WP_111982758.1_2008	1	73	BAC0592arsR	104	6	78	54.7	35.6	5.3e-10
lcl|NZ_NFZS01000002.1_prot_WP_111983106.1_2100	32	143	BAC0089corR	466	6	117	53.9	33.3	1.2e-09
lcl|NZ_NFZS01000002.1_prot_WP_111983107.1_2101	562	678	BAC0089corR	466	3	118	63.9	33.3	5.5e-12
lcl|NZ_NFZS01000002.1_prot_WP_202864078.1_2151	19	317	BAC0251mntH/yfeP	412	22	317	260.8	48	2.2e-71
lcl|NZ_NFZS01000002.1_prot_WP_172461813.1_2162	8	441	BAC0467zraR/hydH	441	8	441	268.9	38.2	7.3e-74
lcl|NZ_NFZS01000002.1_prot_WP_111983165.1_2169	267	513	BAC0468zraS/hydG	465	240	464	92	31	1.8e-20
lcl|NZ_NFZS01000002.1_prot_WP_111983186.1_2195	4	82	BAC0366smtB/ziaR	122	33	110	54.7	41.8	5.3e-10
lcl|NZ_NFZS01000002.1_prot_WP_202864087.1_2209	1	601	BAC0302pbrT	630	23	625	557.4	51.2	1.4e-160
lcl|NZ_NFZS01000002.1_prot_WP_111983258.1_2276	8	728	BAC0101ctpV	770	33	762	270.4	30.5	4.1e-74
lcl|NZ_NFZS01000003.1_prot_WP_111983389.1_2431	2	910	BAC0003acn	943	6	939	1117.8	59.7	0
lcl|NZ_NFZS01000003.1_prot_WP_111983397.1_2439	3	115	BAC0585arsC	141	4	116	96.3	46.9	1.7e-22
lcl|NZ_NFZS01000003.1_prot_WP_172461830.1_2450	6	118	BAC0083copR	227	3	116	47.8	30.4	8.2e-08
lcl|NZ_NFZS01000003.1_prot_WP_111983408.1_2451	12	113	BAC0089corR	466	4	104	54.3	32	1.4e-09
lcl|NZ_NFZS01000003.1_prot_WP_111983416.1_2462	337	514	BAC0465znuC/yebM	251	6	184	89	36.4	1.5e-19
lcl|NZ_NFZS01000003.1_prot_WP_111983428.1_2475	50	116	BAC0288nrsR	234	49	115	42.4	34.3	5.4e-06
lcl|NZ_NFZS01000004.1_prot_WP_111983481.1_2515	1	599	sp|P0A5B9|DNAK_MYCTU	625	1	577	629.4	56.9	3e-182
lcl|NZ_NFZS01000004.1_prot_WP_202864094.1_2528	19	125	BAC0071cmtR	118	2	106	47.8	34.6	1.5e-07
lcl|NZ_NFZS01000004.1_prot_WP_111983499.1_2538	12	254	BAC0604wtpC	344	2	242	127.5	35.1	1.8e-31
lcl|NZ_NFZS01000004.1_prot_WP_111983500.1_2539	1	91	BAC0475dmeR	90	1	90	77.4	40.7	6.3e-17
lcl|NZ_NFZS01000004.1_prot_WP_111983504.1_2543	18	163	BAC0073cnrH	191	33	189	64.3	34.4	9.9e-13
lcl|NZ_NFZS01000004.1_prot_WP_111983533.1_2574	5	467	BAC0224merA	631	170	621	225.3	30	9.8e-61
lcl|NZ_NFZS01000004.1_prot_WP_038616934.1_2577	3	119	BAC0197irlR	229	2	115	71.2	35	6e-15
lcl|NZ_NFZS01000004.1_prot_WP_111983590.1_2643	150	583	BAC0433ybtQ	600	153	580	198	33.4	2.1e-52
lcl|NZ_NFZS01000004.1_prot_WP_111983594.1_2647	6	225	BAC0604wtpC	344	1	210	122.1	35.3	5.7e-30
lcl|NZ_NFZS01000004.1_prot_WP_172461843.1_2688	1193	1321	BAC0125czcR	225	2	125	70.9	32.8	9.3e-14
lcl|NZ_NFZS01000004.1_prot_WP_111983633.1_2689	5	86	BAC0089corR	466	7	82	43.9	30.5	1.8e-06
lcl|NZ_NFZS01000004.1_prot_WP_111983643.1_2701	6	180	BAC0538chrR	186	7	181	176.4	48.3	2e-46
lcl|NZ_NFZS01000004.1_prot_WP_111984387.1_2708	4	217	BAC0162fbpC	356	15	233	110.5	30.4	2.3e-26
lcl|NZ_NFZS01000004.1_prot_WP_111983651.1_2712	3	157	BAC0103cueO	516	1	163	65.5	30.2	1.3e-12
lcl|NZ_NFZS01000004.1_prot_WP_111983665.1_2727	271	367	BAC0108cusB	407	287	382	47.4	30.9	3.1e-07
lcl|NZ_NFZS01000004.1_prot_WP_111983666.1_2728	1	1039	BAC0563acrD	1037	1	1028	918.7	47.7	4.3e-269
lcl|NZ_NFZS01000004.1_prot_WP_111983670.1_2732	6	121	BAC0201kmtR	130	18	121	51.6	36.2	1.3e-08
lcl|NZ_NFZS01000004.1_prot_WP_111984390.1_2755	9	153	BAC0299pbrB/pbrC	358	203	343	87.4	42.5	1.1e-19
lcl|NZ_NFZS01000004.1_prot_WP_111983697.1_2764	828	929	BAC0164fecE	255	137	229	50.8	35.9	6.7e-08
lcl|NZ_NFZS01000004.1_prot_WP_038616383.1_2799	4	223	BAC0197irlR	229	2	217	131.7	36.8	7.1e-33
lcl|NZ_NFZS01000004.1_prot_WP_111983731.1_2800	192	405	BAC0289nrsS	454	222	441	131	35.5	2.2e-32
lcl|NZ_NFZS01000004.1_prot_WP_111983751.1_2826	31	157	BAC0125czcR	225	2	131	77	34.6	1.7e-16
lcl|NZ_NFZS01000004.1_prot_WP_111983772.1_2853	26	223	BAC0607tupC	214	23	210	132.1	37.9	8.2e-33
lcl|NZ_NFZS01000004.1_prot_WP_111983871.1_2964	5	446	BAC0651merA	547	86	530	217.6	31.7	1.9e-58
lcl|NZ_NFZS01000004.1_prot_WP_111983890.1_2987	282	514	BAC0088corC	292	45	279	130.2	32.6	4.7e-32
lcl|NZ_NFZS01000004.1_prot_WP_111983912.1_3013	34	860	BAC0003acn	943	36	942	732.3	43	4.5e-213
lcl|NZ_NFZS01000004.1_prot_WP_111983939.1_3045	1	223	BAC0083copR	227	1	226	172.9	45.8	2.8e-45
lcl|NZ_NFZS01000004.1_prot_WP_111983940.1_3046	186	453	BAC0752copS	445	174	441	101.3	30.2	2.2e-23
lcl|NZ_NFZS01000004.1_prot_WP_111983947.1_3053	21	228	BAC0274nikE	268	24	235	119	38	5.1e-29
lcl|NZ_NFZS01000004.1_prot_WP_111983957.1_3064	16	227	BAC0274nikE	268	27	233	70.1	30.1	2.8e-14
lcl|NZ_NFZS01000004.1_prot_WP_111983976.1_3088	13	222	BAC0604wtpC	344	6	221	104.8	32.3	1.2e-24
lcl|NZ_NFZS01000004.1_prot_WP_111983980.1_3092	18	201	BAC0274nikE	268	24	216	57.8	30.1	3e-10
lcl|NZ_NFZS01000004.1_prot_WP_111984001.1_3119	1	188	BAC0028chrC	202	1	189	79	31.1	4.6e-17
lcl|NZ_NFZS01000004.1_prot_WP_111984016.1_3136	20	271	BAC0088corC	292	23	274	240.7	49	1.3e-65
lcl|NZ_NFZS01000004.1_prot_WP_111984045.1_3166	6	109	BAC0467zraR/hydH	441	8	111	76.3	36.5	2.9e-16
lcl|NZ_NFZS01000004.1_prot_WP_038615615.1_3170	11	229	BAC0719copR	230	3	221	162.5	41.8	4e-42
lcl|NZ_NFZS01000004.1_prot_WP_111984049.1_3172	32	230	BAC0274nikE	268	27	231	111.3	37.7	1e-26
lcl|NZ_NFZS01000004.1_prot_WP_111984063.1_3188	1913	2032	BAC0125czcR	225	3	119	64.7	32.5	9.5e-12
lcl|NZ_NFZS01000004.1_prot_WP_111984066.1_3191	4	119	BAC0753copR	227	3	116	72	34.5	3.6e-15
lcl|NZ_NFZS01000004.1_prot_WP_051595671.1_3192	17	111	BAC0083copR	227	20	112	65.5	32.6	3.2e-13
lcl|NZ_NFZS01000004.1_prot_WP_111984105.1_3234	8	215	BAC0490G2alt	221	5	207	103.6	34.7	2.1e-24
lcl|NZ_NFZS01000004.1_prot_WP_111984110.1_3243	5	344	BAC0355ruvB	352	6	348	459.1	68.2	3e-131
lcl|NZ_NFZS01000004.1_prot_WP_111984440.1_3276	309	532	BAC0091corS	491	272	486	111.7	33.5	1.8e-26
lcl|NZ_NFZS01000004.1_prot_WP_111984144.1_3285	5	465	BAC0089corR	466	6	457	305.4	41	7.3e-85
lcl|NZ_NFZS01000004.1_prot_WP_172461876.1_3287	60	133	BAC0753copR	227	47	121	43.5	34.7	5.8e-06
lcl|NZ_NFZS01000004.1_prot_WP_111984146.1_3288	64	134	BAC0638copR	231	47	115	49.7	35.2	2.3e-08
lcl|NZ_NFZS01000004.1_prot_WP_111984162.1_3306	7	121	BAC0581arsC	139	6	116	63.5	33.6	1.7e-12
lcl|NZ_NFZS01000004.1_prot_WP_111984163.1_3307	6	354	BAC0579arsB	383	11	369	252.7	42.6	4.4e-69
lcl|NZ_NFZS01000004.1_prot_WP_111984184.1_3329	8	225	BAC0719copR	230	3	219	157.1	39.7	1.6e-40
lcl|NZ_NFZS01000004.1_prot_WP_111984185.1_3330	665	880	BAC0126czcS	476	241	454	87.4	33.5	6e-19
lcl|NZ_NFZS01000004.1_prot_WP_202864108.1_3334	82	572	BAC0101ctpV	770	242	713	188.3	30.8	1.9e-49
lcl|NZ_NFZS01000004.1_prot_WP_111984450.1_3352	5	127	BAC0644corD	125	3	125	138.3	48	4.2e-35
lcl|NZ_NFZS01000004.1_prot_WP_038621324.1_3431	1	223	BAC0719copR	230	1	224	182.2	42.4	4.6e-48
lcl|NZ_NFZS01000004.1_prot_WP_111984305.1_3472	10	257	BAC0400troB	266	6	240	97.1	32.7	2.3e-22
lcl|NZ_NFZS01000004.1_prot_WP_111984315.1_3483	1	226	BAC0308pcoR	226	1	226	193.4	44.2	2e-51
lcl|NZ_NFZS01000004.1_prot_WP_111984318.1_3488	11	216	BAC0274nikE	268	18	231	112.8	36.4	3.4e-27
lcl|NZ_NFZS01000004.1_prot_WP_111984354.1_3527	5	105	BAC0719copR	230	124	224	60.8	34.7	4.4e-11
lcl|NZ_NFZS01000005.1_prot_WP_111984484.1_3569	158	614	BAC0224merA	631	173	626	219.5	30.8	7e-59
lcl|NZ_NFZS01000005.1_prot_WP_111984506.1_3592	25	394	BAC0285nreB	416	22	400	214.2	38.1	2e-57
lcl|NZ_NFZS01000005.1_prot_WP_111984516.1_3602	6	399	BAC0293ruvB	397	3	397	451.8	57.7	1e-128
lcl|NZ_NFZS01000005.1_prot_WP_111984525.1_3612	1	221	BAC0487pmrA	222	1	219	177.9	43	8.4e-47
lcl|NZ_NFZS01000005.1_prot_WP_111984526.1_3613	167	457	BAC0112cusS	480	188	480	126.3	31.4	6e-31
lcl|NZ_NFZS01000005.1_prot_WP_111984530.1_3617	6	126	BAC0125czcR	225	4	121	55.5	32.5	7.4e-10
lcl|NZ_NFZS01000005.1_prot_WP_111984563.1_3655	1	886	BAC0087mgtA	898	9	896	899.4	53	2.2e-263
lcl|NZ_NFZS01000005.1_prot_WP_111984689.1_3687	5	119	BAC0683merR1	144	8	119	60.1	35.3	1.9e-11
lcl|NZ_NFZS01000005.1_prot_WP_111984600.1_3700	153	454	BAC0488pmrB	364	53	347	123.6	33.3	3.9e-30
lcl|NZ_NFZS01000005.1_prot_WP_111984601.1_3701	1	218	BAC0487pmrA	222	1	218	168.7	41.3	5.1e-44
lcl|NZ_NFZS01000005.1_prot_WP_111984613.1_3715	10	472	BAC0343silC	461	7	459	184.9	30.9	1.6e-48
lcl|NZ_NFZS01000005.1_prot_WP_111984644.1_3749	7	1023	BAC0647mdtC	1026	7	1016	779.6	45.4	3e-227
lcl|NZ_NFZS01000005.1_prot_WP_111984645.1_3750	2	1063	BAC0646mdtB	1040	11	1032	956.8	50.5	1.4e-280
lcl|NZ_NFZS01000005.1_prot_WP_111984646.1_3751	5	408	BAC0645mdtA	413	9	412	234.2	36.2	1.9e-63
lcl|NZ_NFZS01000006.1_prot_WP_111984709.1_3808	339	424	BAC0080copJ	174	61	156	42.7	30.9	8.8e-06
lcl|NZ_NFZS01000006.1_prot_WP_111984726.1_3829	33	216	BAC0604wtpC	344	26	209	87	33	2.2e-19
lcl|NZ_NFZS01000006.1_prot_WP_111984743.1_3847	56	167	BAC0035arsM	283	71	181	60.5	33.9	2.2e-11
lcl|NZ_NFZS01000006.1_prot_WP_172461930.1_3863	270	342	BAC0091corS	491	202	273	47	38.4	7.7e-07
lcl|NZ_NFZS01000006.1_prot_WP_111984826.1_3950	1	149	BAC0048bfrA	159	1	149	135.2	46.3	4.4e-34
lcl|NZ_NFZS01000007.1_prot_WP_111984994.1_4038	18	229	BAC0162fbpC	356	14	226	134	33.2	1.6e-33
lcl|NZ_NFZS01000007.1_prot_WP_111984995.1_4041	1	1039	BAC0647mdtC	1026	1	1021	708	42.8	1.1e-205
lcl|NZ_NFZS01000007.1_prot_WP_111984931.1_4042	1	1037	BAC0647mdtC	1026	1	1021	730.7	43.7	1.6e-212
lcl|NZ_NFZS01000007.1_prot_WP_111984945.1_4058	1	113	BAC0125czcR	225	1	113	59.7	33.9	3.5e-11
lcl|NZ_NFZS01000007.1_prot_WP_111984966.1_4082	18	236	BAC0083copR	227	2	220	100.9	33.6	1.4e-23
lcl|NZ_NFZS01000007.1_prot_WP_111984967.1_4083	208	455	BAC0091corS	491	253	487	100.9	30.6	2.8e-23

[truncated: 2 more sheets: D_jiangning_Unique MRGs, D_jiangning_MRG Hits]
